# Supplementary material
Source: PubMed Central journal article supplement (PMC2757032)
Supplement: pr9004597_si_001.pdf [file pr9004597_si_001.pdf]

Q72LZ4

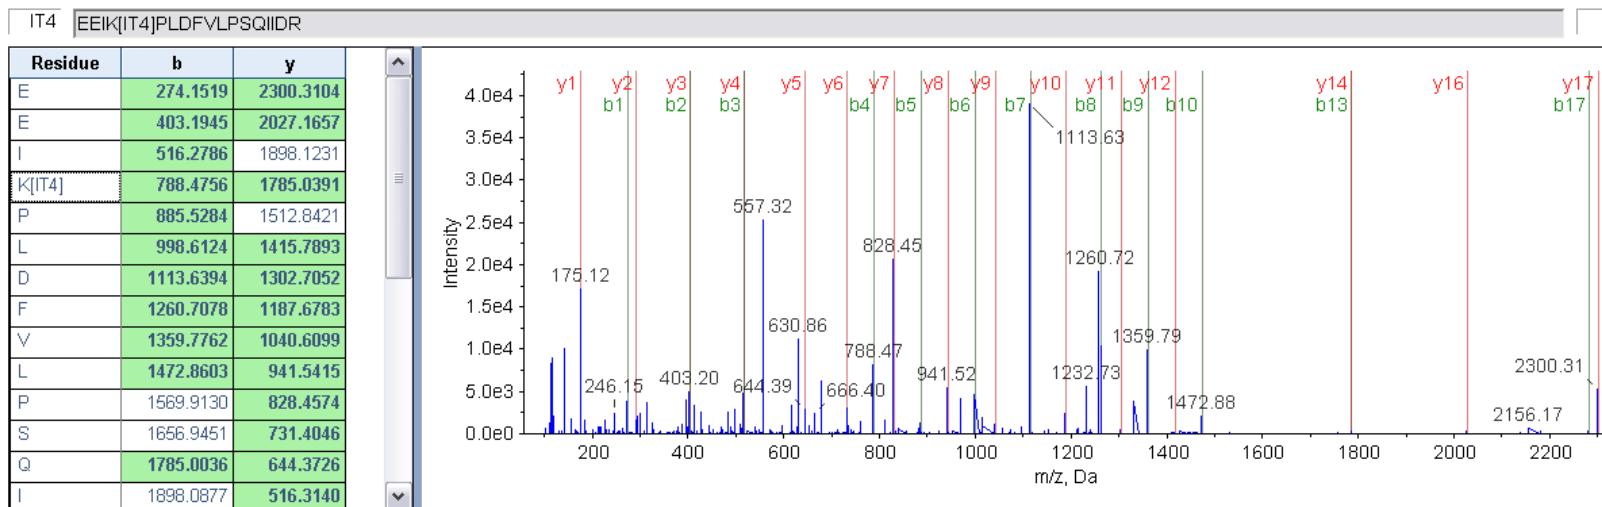

Q72MX9\_LEPIC

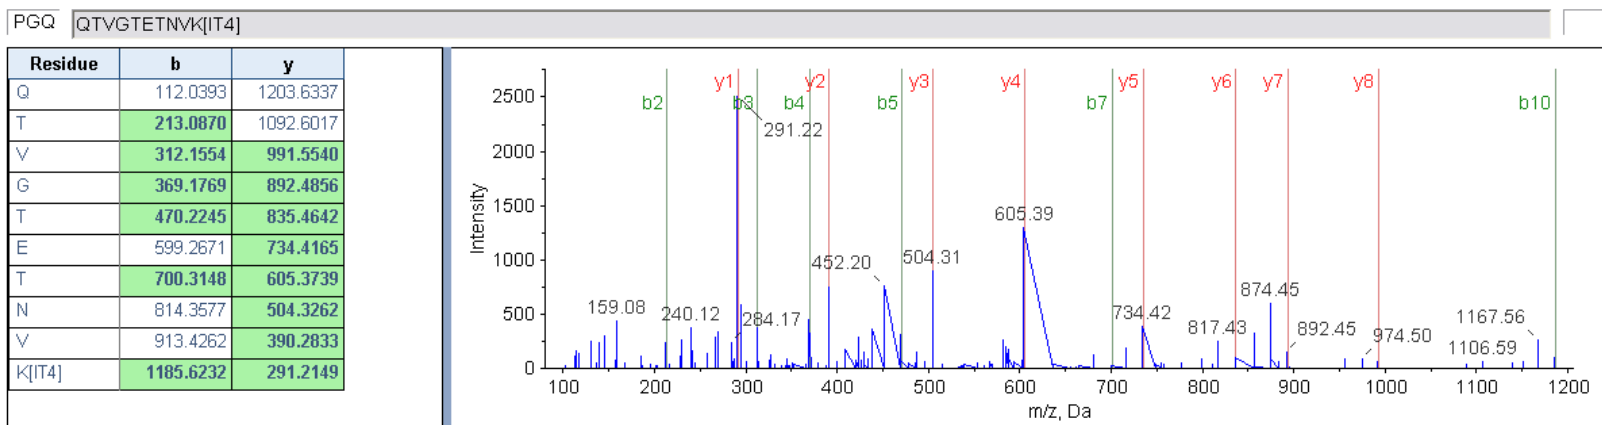

### Q72RP1

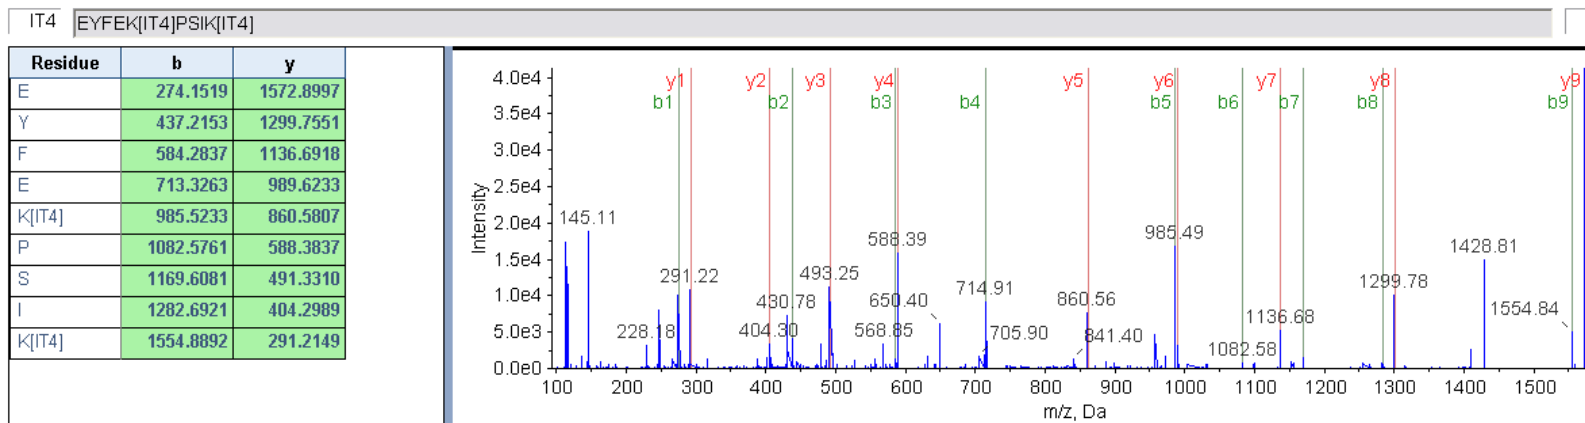

### Q72V73

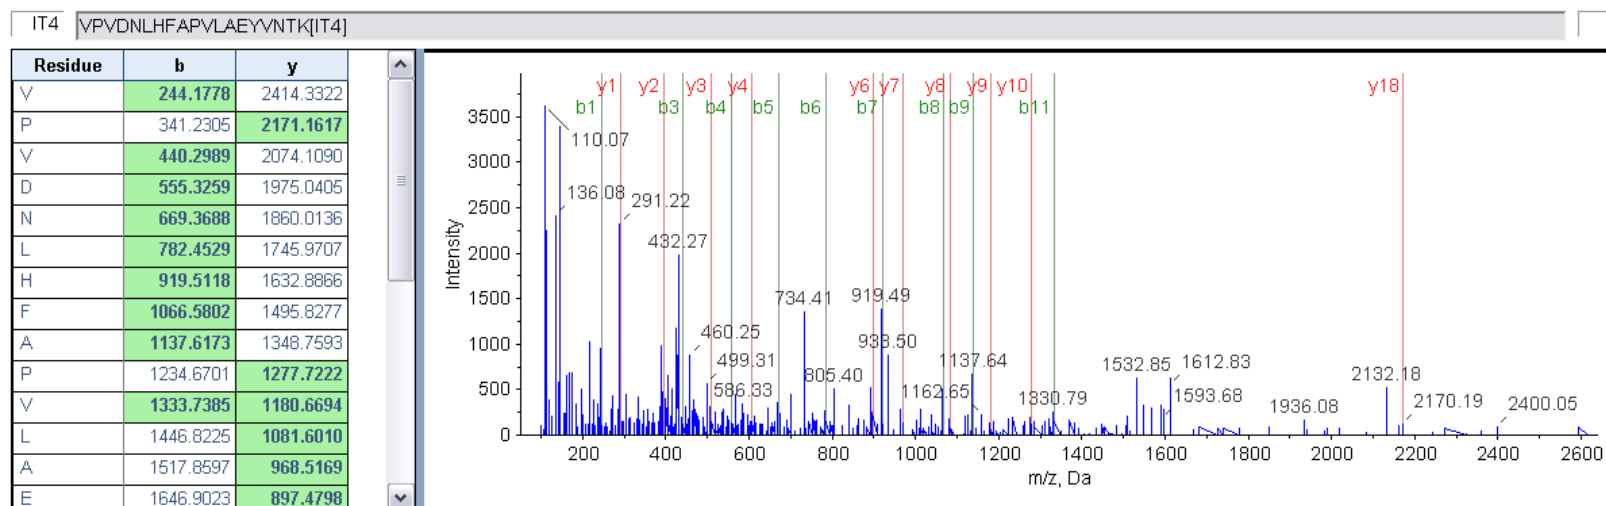

LIC2\_SPN3857

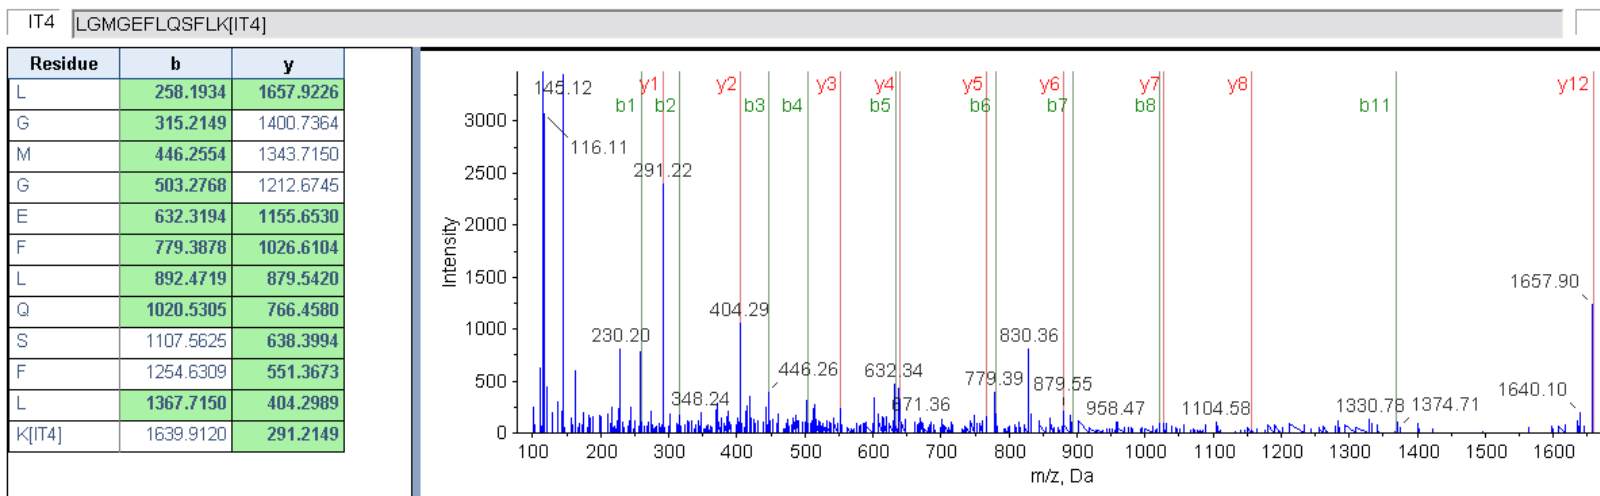

Q75G27

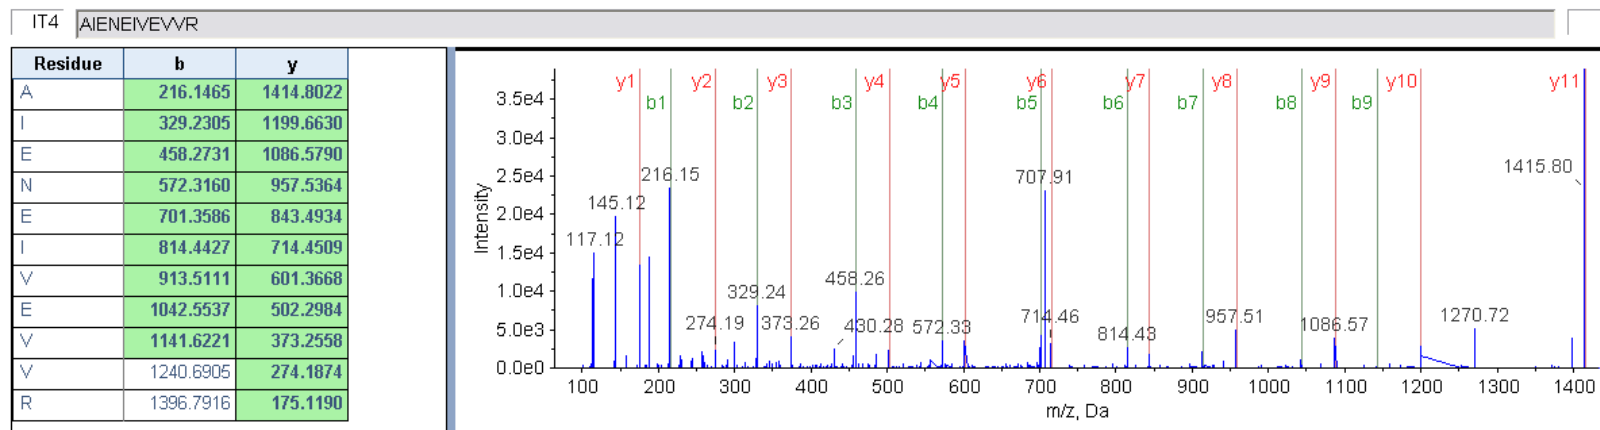

### Q75FW7

IT4 | TAMVAAIPLK[IT4]R

| Residue | b         | y         |
|---------|-----------|-----------|
| T       | 246.1570  | 1458.9069 |
| A       | 317.1941  | 1213.7571 |
| M       | 448.2346  | 1142.7200 |
| V       | 547.3030  | 1011.6795 |
| A       | 618.3401  | 912.6111  |
| A       | 689.3773  | 841.5740  |
| I       | 802.4613  | 770.5369  |
| P       | 899.5141  | 657.4528  |
| L       | 1012.5981 | 560.4000  |
| K[IT4]  | 1284.7952 | 447.3160  |
| R       | 1440.8963 | 175.1190  |

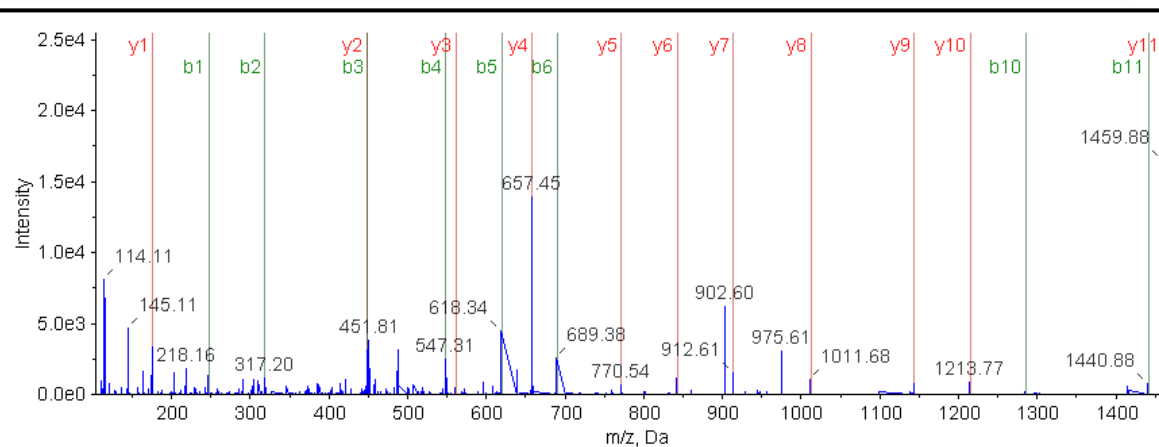

### Q75F18

IT4 | IAIAGPHR

| Residue | b         | y         |
|---------|-----------|-----------|
| I       | 258.1934  | 1091.6806 |
| A       | 329.2305  | 834.4944  |
| I       | 442.3146  | 763.4573  |
| I       | 555.3986  | 650.3733  |
| A       | 626.4358  | 537.2892  |
| G       | 683.4572  | 466.2521  |
| P       | 780.5100  | 409.2306  |
| H       | 917.5689  | 312.1779  |
| R       | 1073.6700 | 175.1190  |

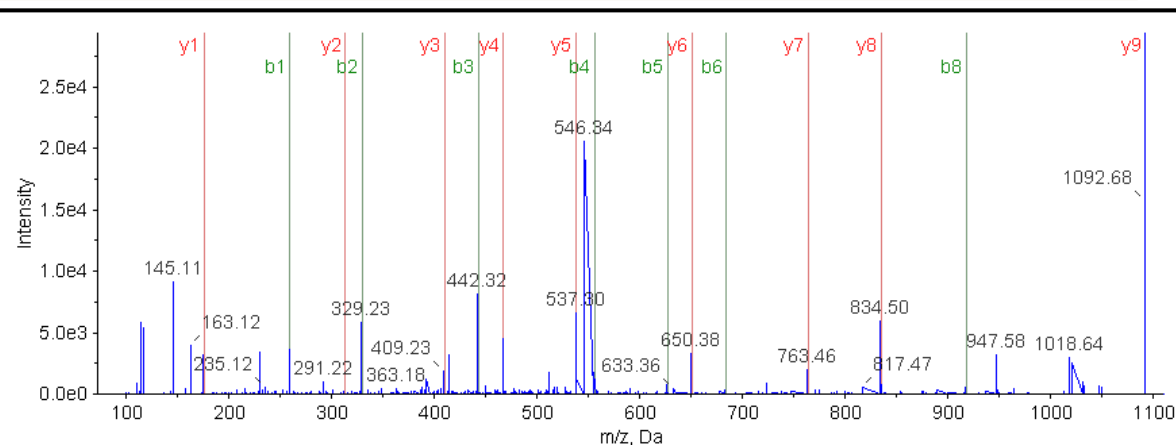

### Q72VT5

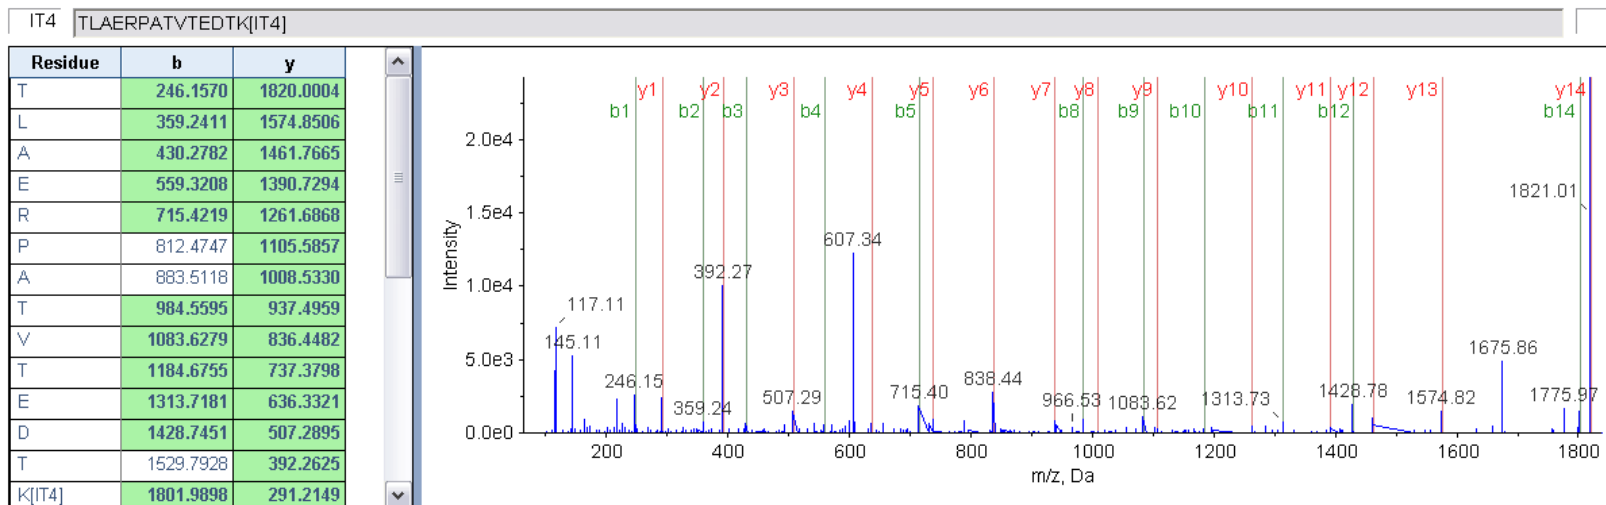

### Q72VD6

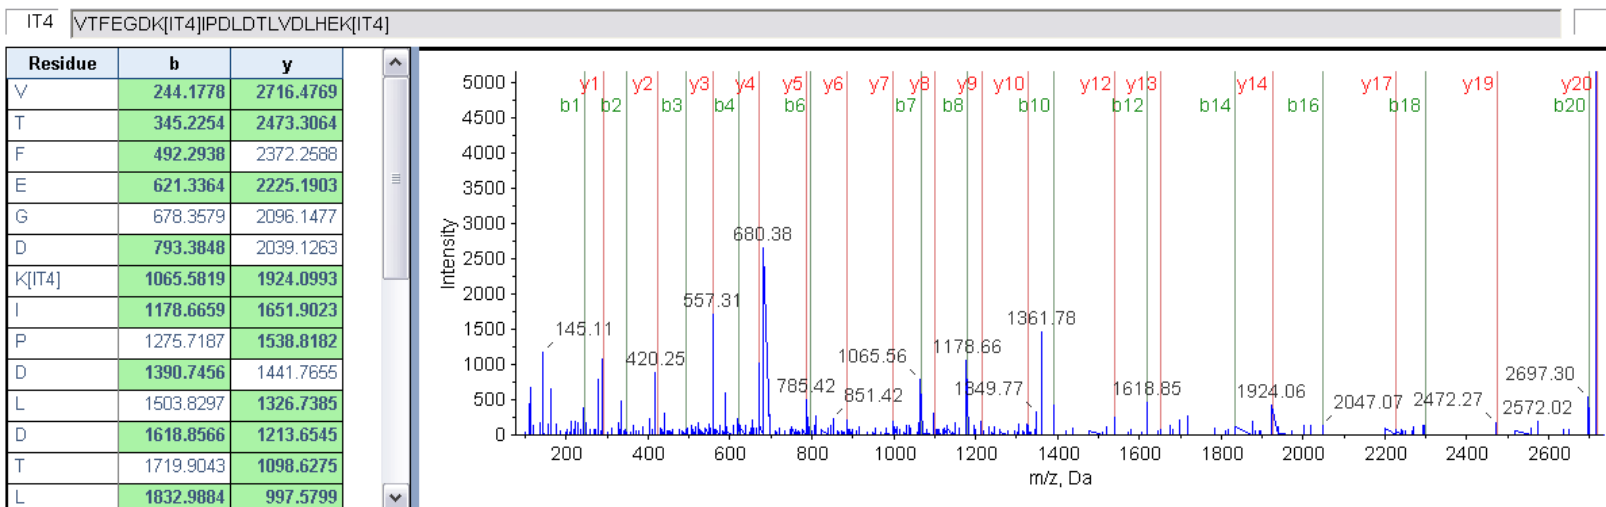

Q72VC1

IT4 QPATPEEEIAR

| Residue | b         | y         |
|---------|-----------|-----------|
| Q       | 273.1679  | 1455.7560 |
| P       | 370.2207  | 1183.5953 |
| A       | 441.2578  | 1086.5426 |
| T       | 542.3055  | 1015.5055 |
| P       | 639.3582  | 914.4578  |
| E       | 768.4008  | 817.4050  |
| E       | 897.4434  | 688.3624  |
| E       | 1026.4860 | 559.3198  |
| I       | 1139.5701 | 430.2772  |
| A       | 1210.6072 | 317.1932  |
| A       | 1281.6443 | 246.1561  |
| R       | 1437.7454 | 175.1190  |

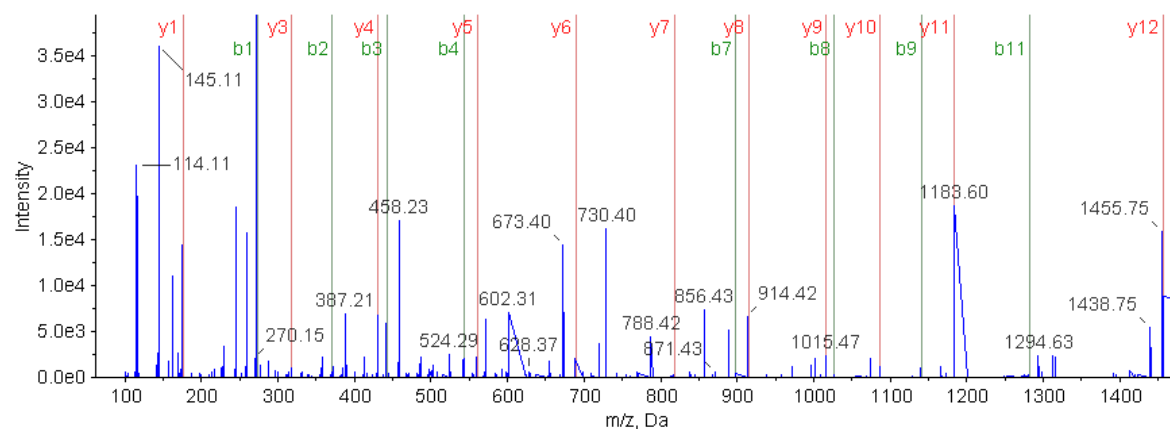

Q72V61

IT4 YEVDK[IT4]EYGILK[IT4]

| Residue | b         | y         |
|---------|-----------|-----------|
| Y       | 308.1727  | 1789.0107 |
| E       | 437.2153  | 1481.8454 |
| V       | 536.2837  | 1352.8028 |
| D       | 651.3106  | 1253.7343 |
| K[IT4]  | 923.5076  | 1138.7074 |
| E       | 1052.5502 | 866.5104  |
| Y       | 1215.6136 | 737.4678  |
| G       | 1272.6350 | 574.4045  |
| I       | 1385.7191 | 517.3830  |
| L       | 1498.8032 | 404.2989  |
| K[IT4]  | 1771.0002 | 291.2149  |

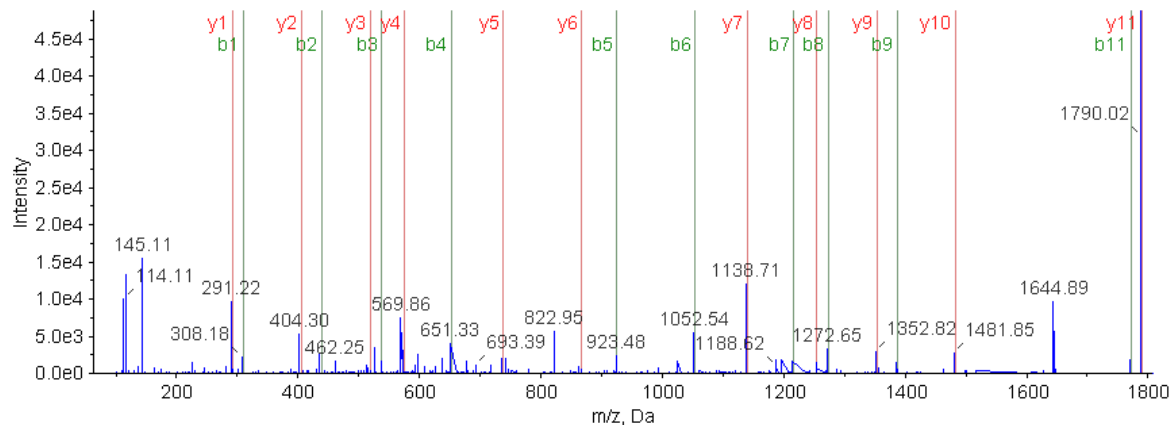

### Q72UU9

IT4 | EITGLDSEIHGEK(IT4)

| Residue | b         | y         |
|---------|-----------|-----------|
| E       | 274.1519  | 1715.9054 |
| I       | 387.2360  | 1442.7607 |
| T       | 488.2837  | 1329.6767 |
| G       | 545.3051  | 1228.6290 |
| L       | 658.3892  | 1171.6075 |
| D       | 773.4161  | 1058.5235 |
| S       | 860.4482  | 943.4965  |
| E       | 989.4908  | 856.4645  |
| I       | 1102.5748 | 727.4219  |
| H       | 1239.6337 | 614.3378  |
| G       | 1296.6552 | 477.2789  |
| E       | 1425.6978 | 420.2575  |
| K(IT4)  | 1697.8948 | 291.2149  |

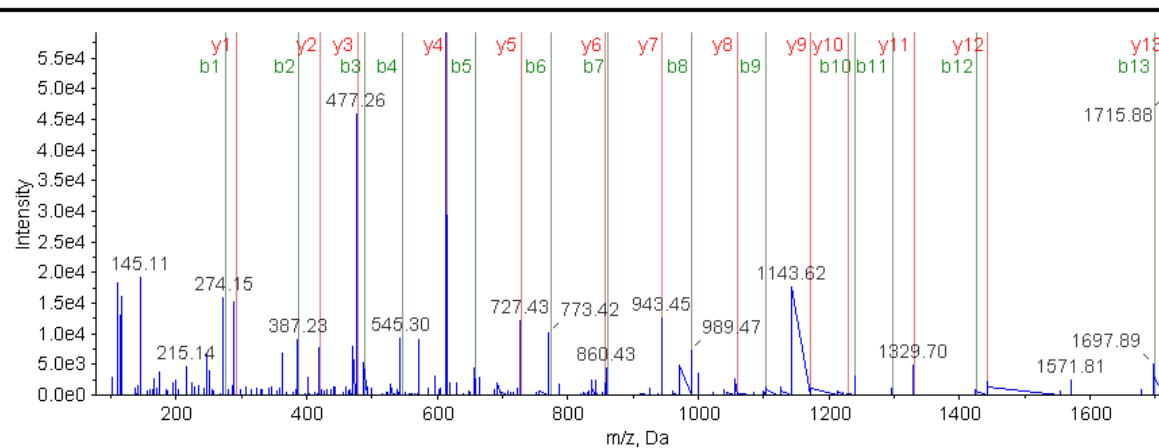

### Q72UU2

IT4 | IPAEVLTEFR

| Residue | b         | y         |
|---------|-----------|-----------|
| I       | 258.1934  | 1318.7487 |
| P       | 355.2462  | 1061.5626 |
| A       | 426.2833  | 964.5098  |
| E       | 555.3259  | 893.4727  |
| V       | 654.3943  | 764.4301  |
| L       | 767.4784  | 665.3617  |
| T       | 868.5260  | 552.2776  |
| E       | 997.5686  | 451.2300  |
| F       | 1144.6370 | 322.1874  |
| R       | 1300.7381 | 175.1190  |

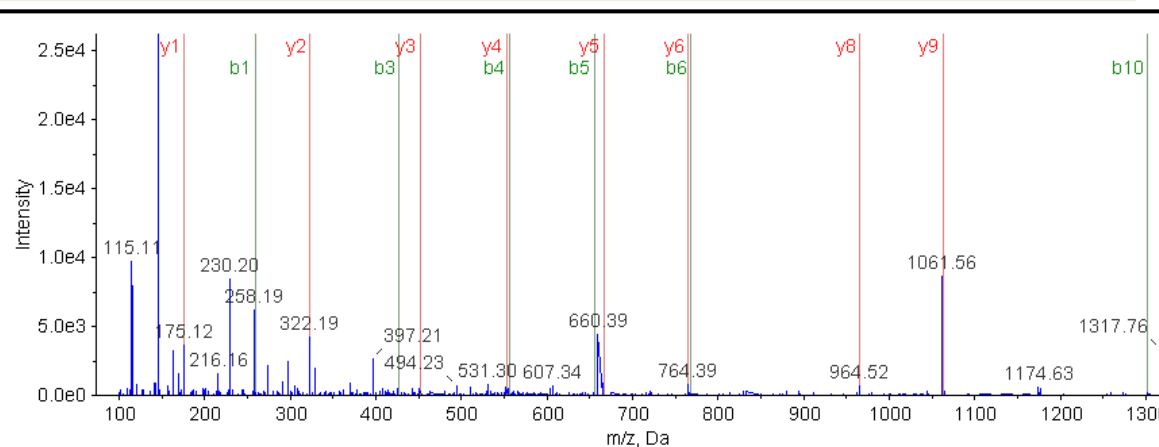

### Q72UH7

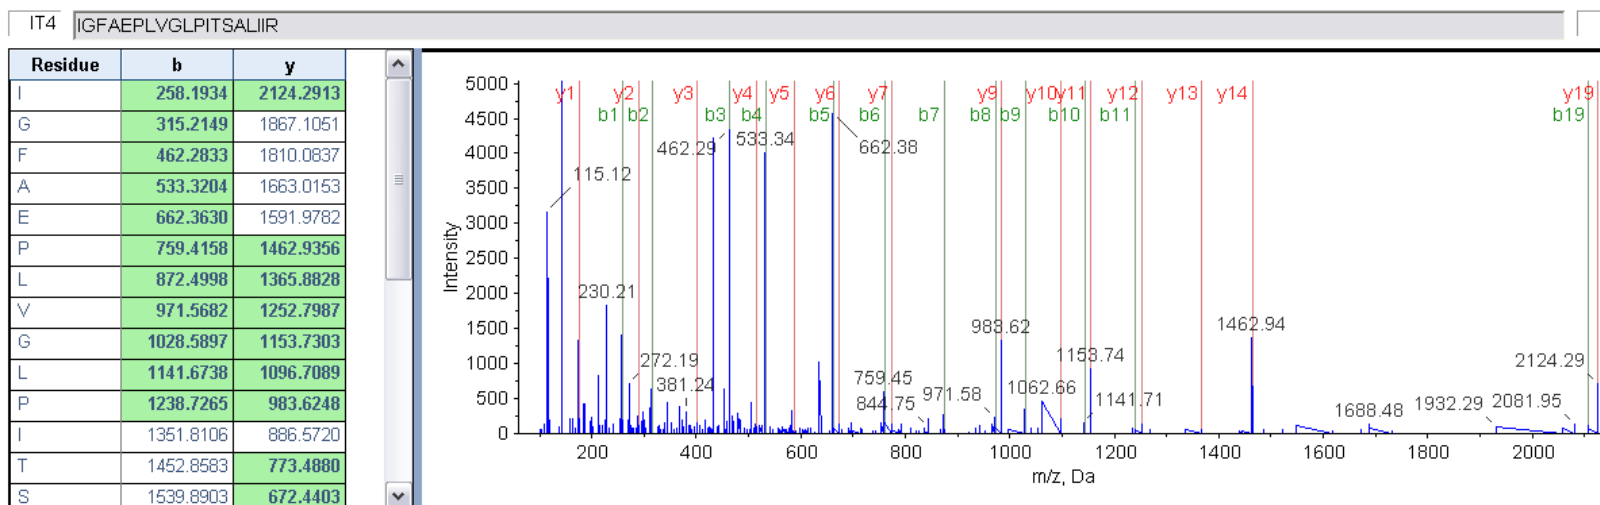

### Q72TJ7

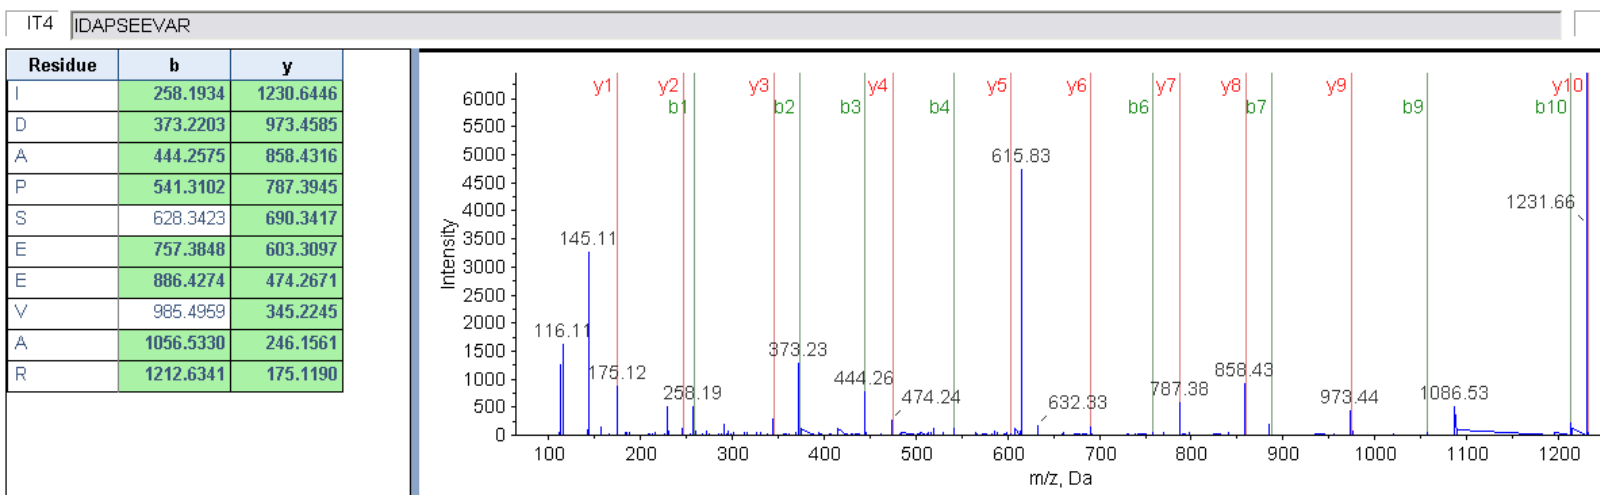



### Q72SZ8

PGQ QTGLELYEREER

| Residue | b         | y         |
|---------|-----------|-----------|
| Q       | 112.0393  | 1392.6390 |
| T       | 213.0870  | 1281.6070 |
| G       | 270.1084  | 1180.5593 |
| L       | 383.1925  | 1123.5378 |
| E       | 512.2351  | 1010.4538 |
| Y       | 675.2984  | 881.4112  |
| E       | 804.3410  | 718.3478  |
| R       | 960.4421  | 589.3052  |
| E       | 1089.4847 | 433.2041  |
| E       | 1218.5273 | 304.1615  |
| R       | 1374.6284 | 175.1190  |

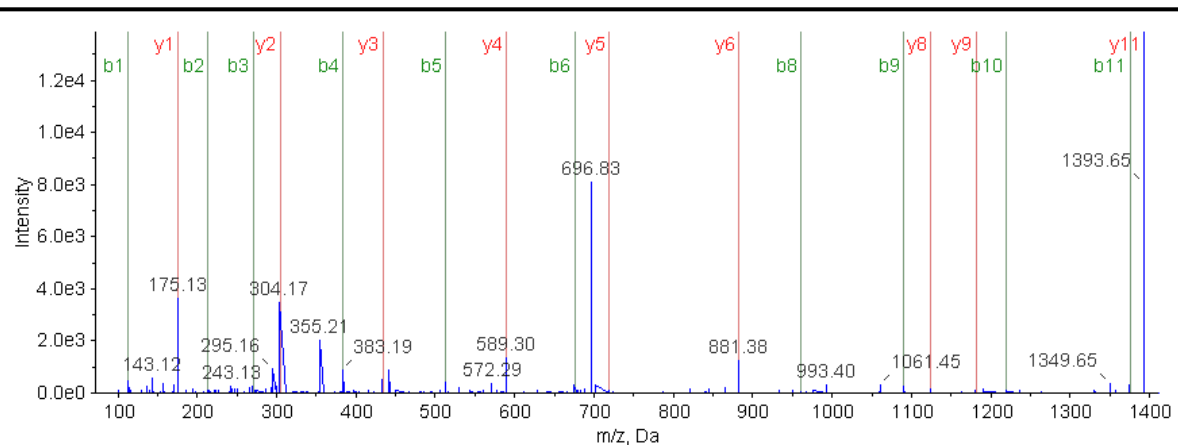

### Q72SU9

IT4 SVQDQSDSASGALVHADGK[IT4]

| Residue | b         | y         |
|---------|-----------|-----------|
| S       | 232.1414  | 2160.0771 |
| V       | 331.2098  | 1928.9430 |
| Q       | 459.2684  | 1829.8746 |
| D       | 574.2953  | 1701.8160 |
| Q       | 702.3539  | 1586.7891 |
| S       | 789.3859  | 1458.7305 |
| D       | 904.4129  | 1371.6985 |
| S       | 991.4449  | 1256.6715 |
| A       | 1062.4820 | 1169.6395 |
| S       | 1149.5140 | 1098.6024 |
| G       | 1206.5355 | 1011.5704 |
| A       | 1277.5726 | 954.5489  |
| L       | 1390.6567 | 883.5118  |
| V       | 1489.7251 | 770.4277  |

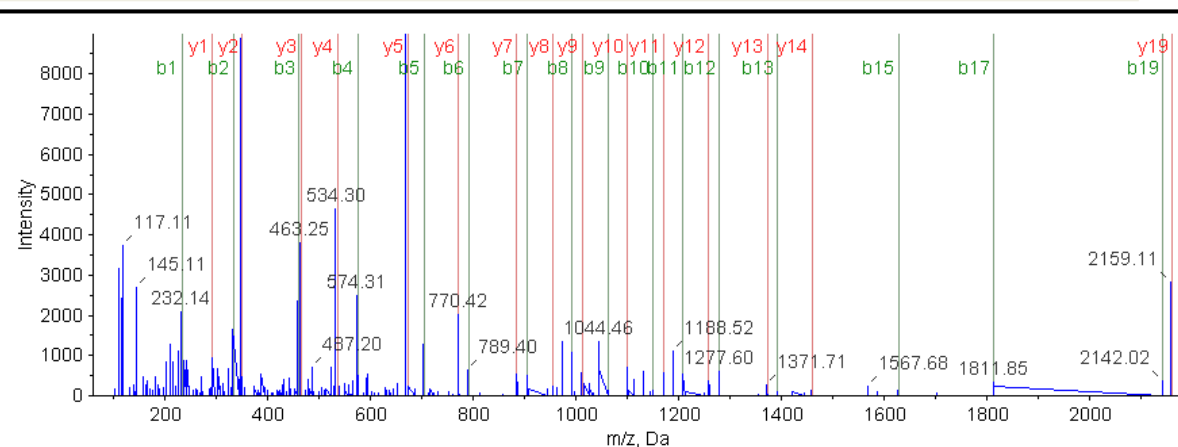

### Q72SP3

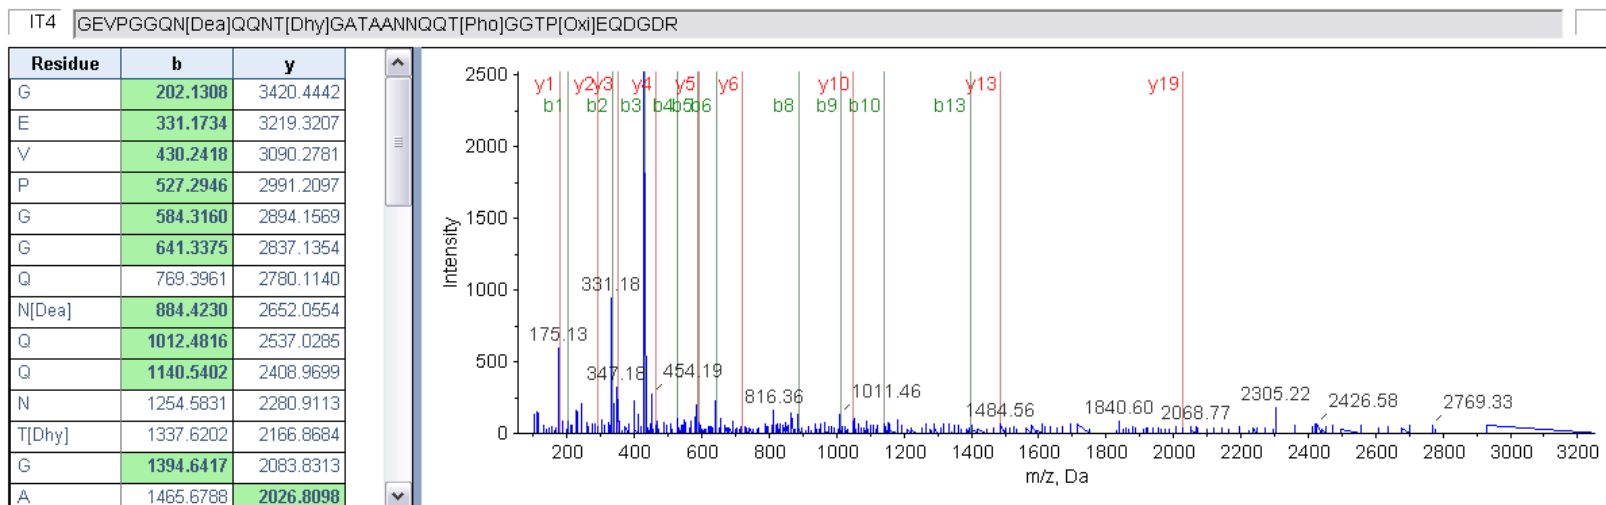

### Q72SH2

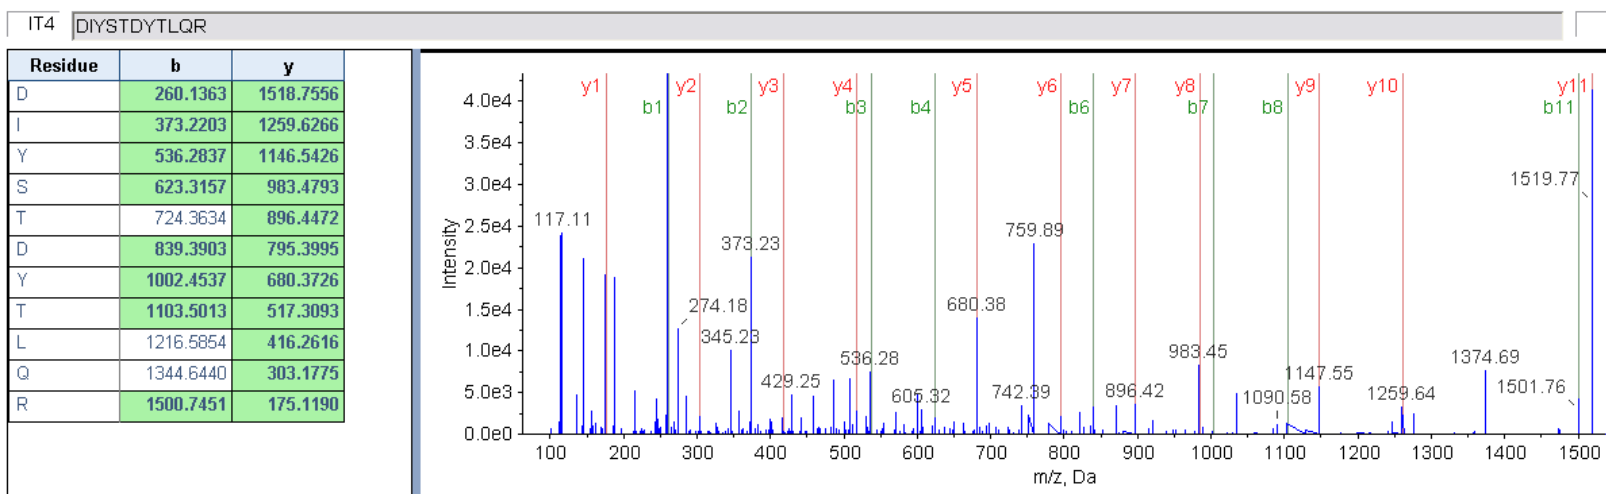

### Q72S33

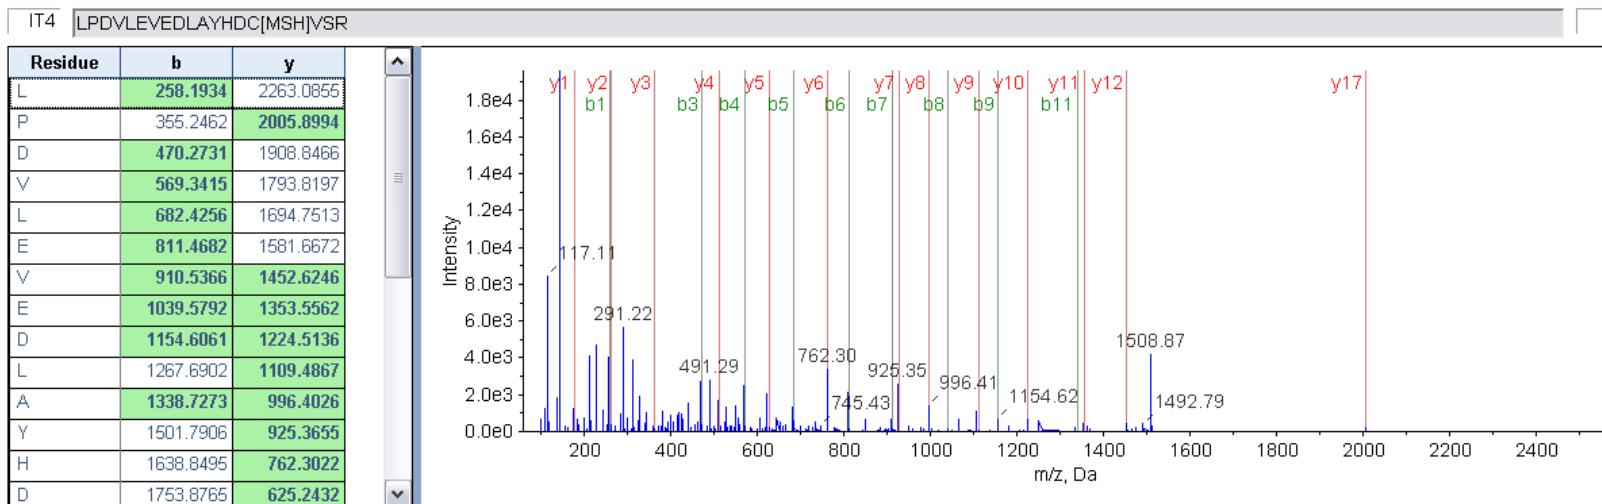

### Q72RZ8

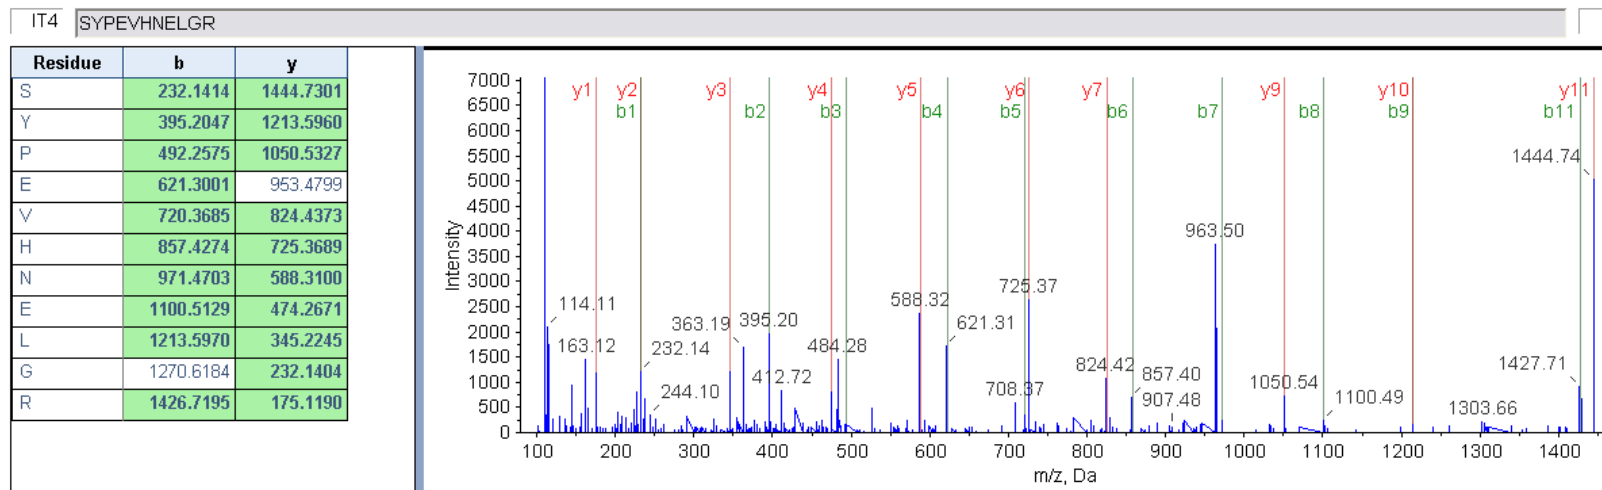

### Q72RW3

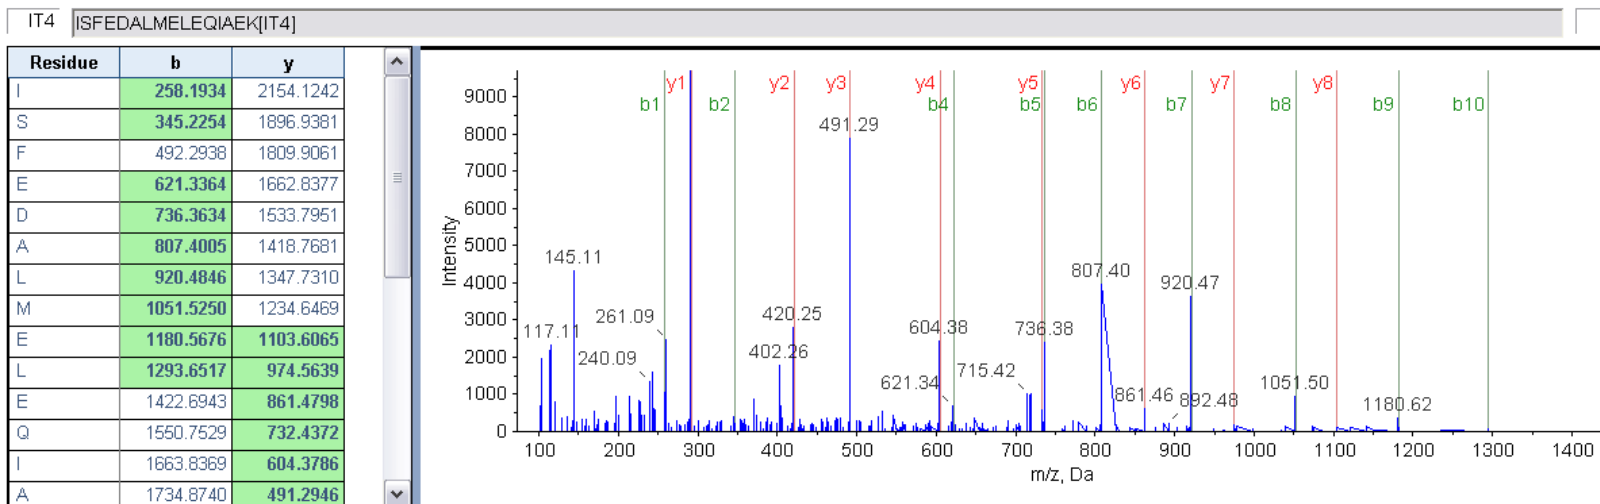

### Q72RS0

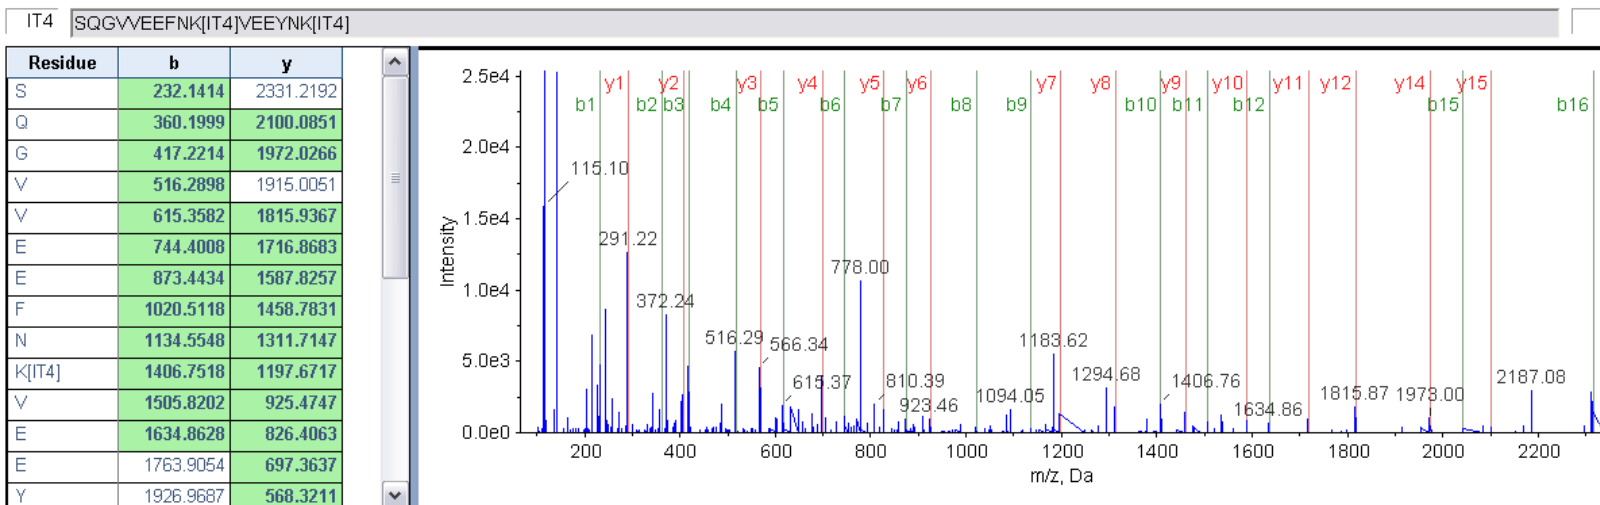

### Q72QM9

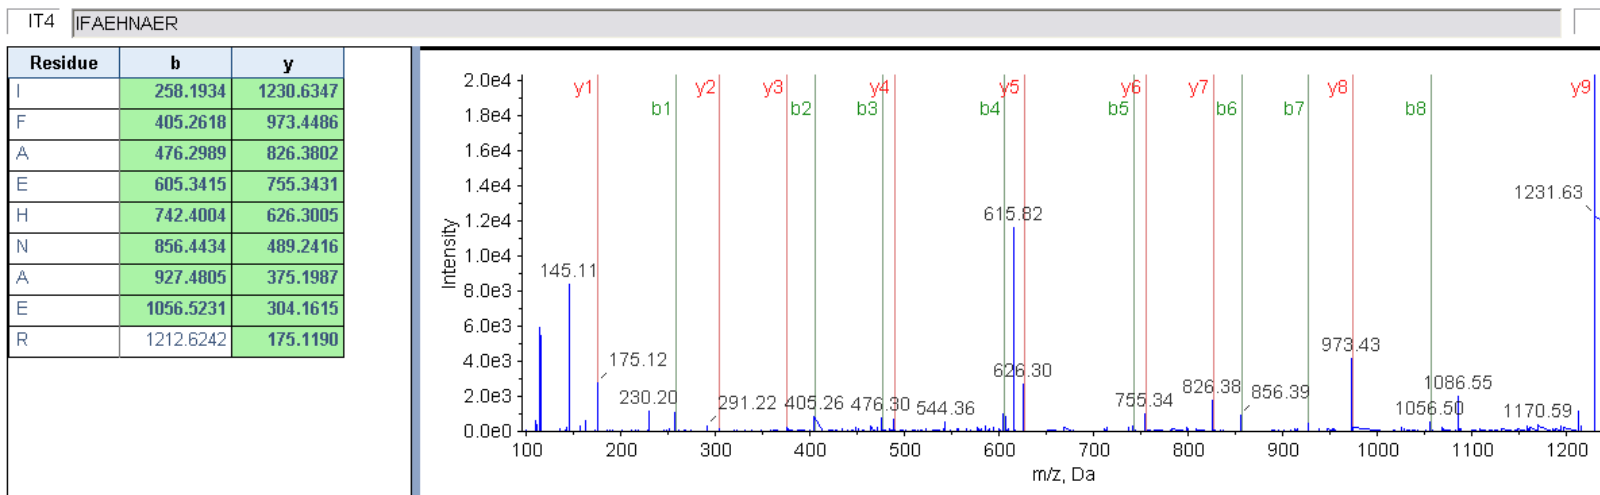

### Q72PU6

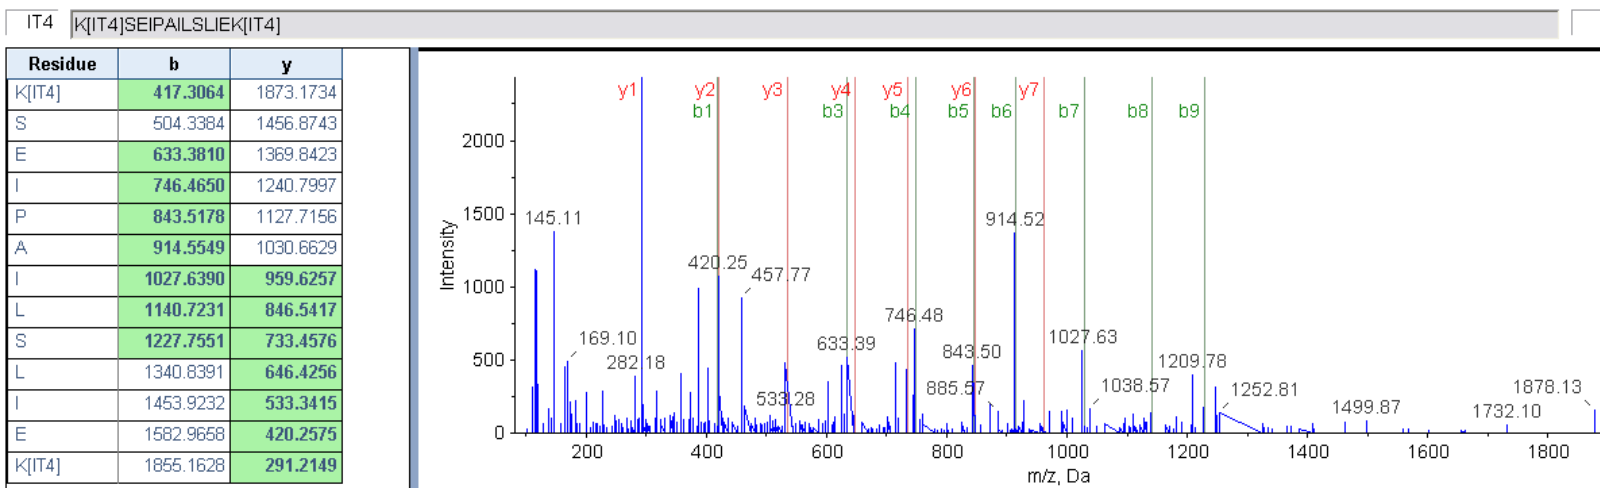

### Q72NT3

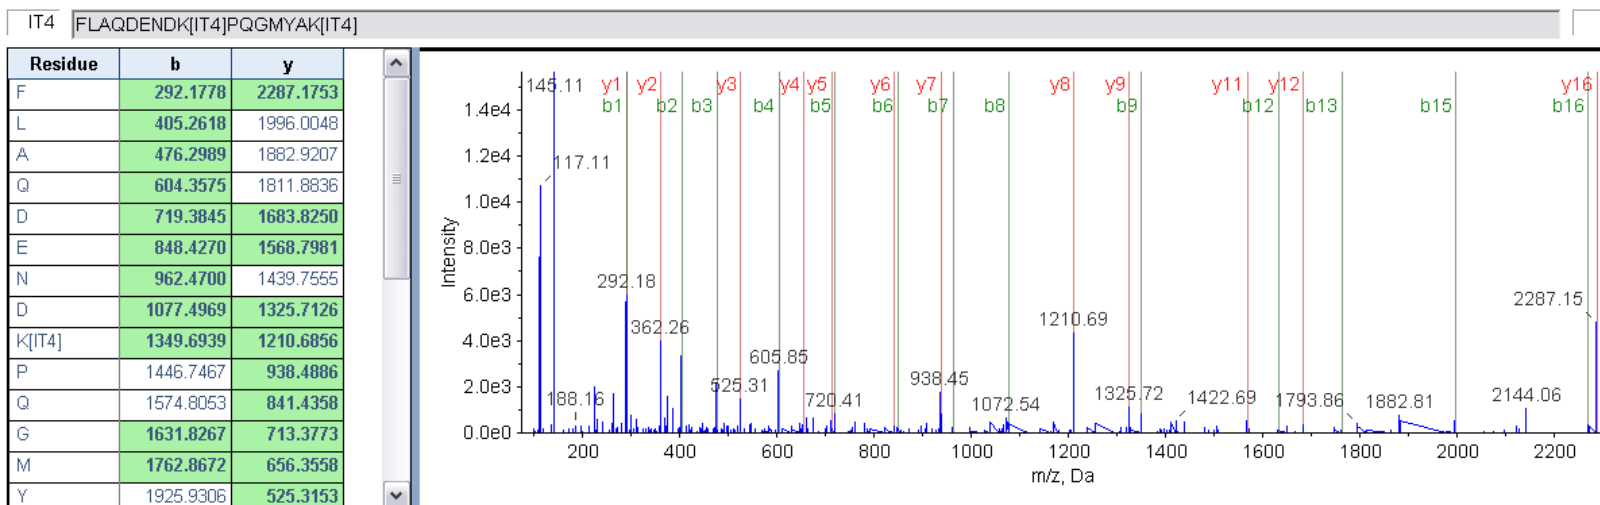

### Q72NQ6

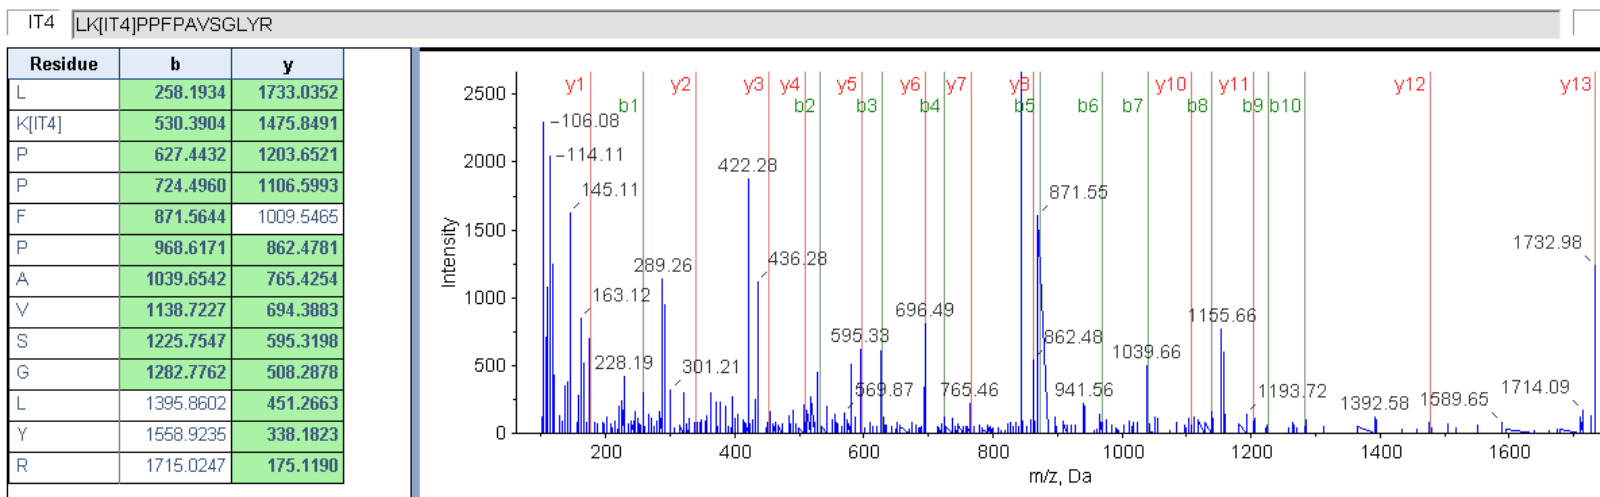

### Q72MG4

IT4 FRPGN[Dea]NVGLGK[IT4]

| Residue | b         | y         |
|---------|-----------|-----------|
| F       | 292.1778  | 1447.8260 |
| R       | 448.2789  | 1156.6555 |
| P       | 545.3316  | 1000.5544 |
| G       | 602.3531  | 903.5016  |
| N[Dea]  | 717.3800  | 846.4801  |
| N       | 831.4230  | 731.4532  |
| V       | 930.4914  | 617.4103  |
| G       | 987.5128  | 518.3419  |
| L       | 1100.5969 | 461.3204  |
| G       | 1157.6184 | 348.2363  |
| K[IT4]  | 1429.8154 | 291.2149  |

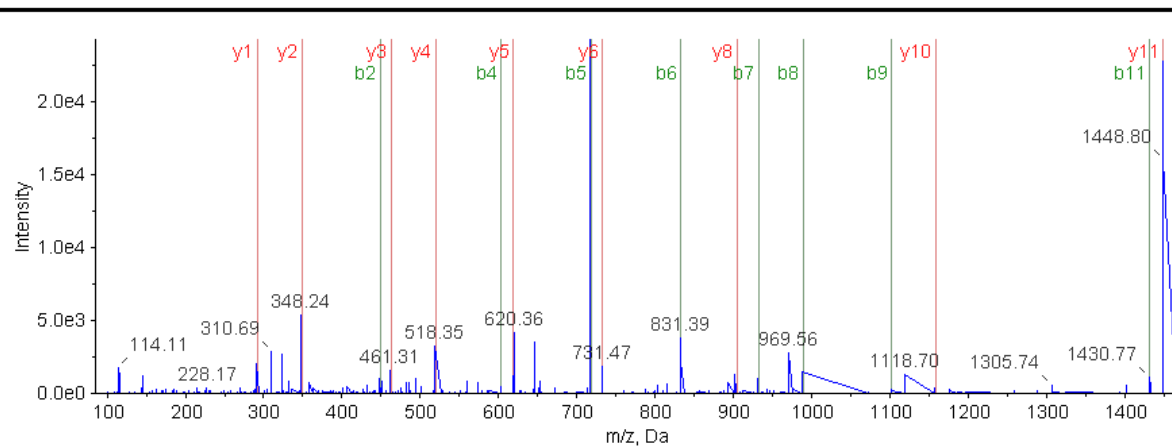

### Q72M59

IT4 ASIIEYPLTEHK[IT4]

| Residue | b         | y         |
|---------|-----------|-----------|
| A       | 216.1465  | 1817.9887 |
| S       | 303.1785  | 1602.8495 |
| I       | 416.2625  | 1515.8175 |
| E       | 545.3051  | 1402.7335 |
| I       | 658.3892  | 1273.6909 |
| Y       | 821.4525  | 1160.6068 |
| E       | 950.4951  | 997.5435  |
| P       | 1047.5479 | 868.5009  |
| L       | 1160.6320 | 771.4481  |
| T       | 1261.6796 | 658.3641  |
| E       | 1390.7222 | 557.3164  |
| H       | 1527.7811 | 428.2738  |
| K[IT4]  | 1799.9782 | 291.2149  |

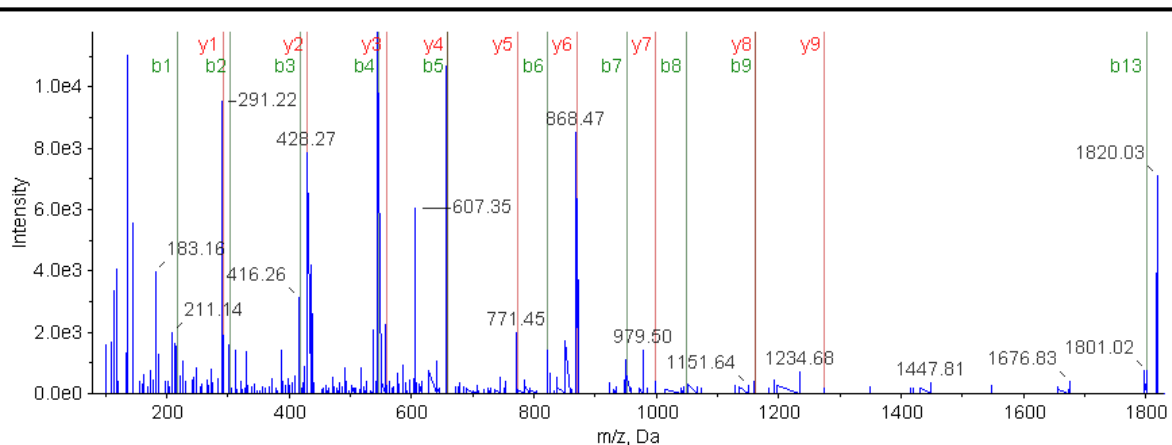

Q72LZ8

IT4 | SNLFLK[IT4]PSVFR

| Residue | b         | y         |
|---------|-----------|-----------|
| S       | 232.1414  | 1482.8671 |
| N       | 346.1843  | 1251.7330 |
| L       | 459.2684  | 1137.6901 |
| F       | 606.3368  | 1024.6060 |
| K[IT4]  | 878.5338  | 877.5376  |
| P       | 975.5866  | 605.3406  |
| S       | 1062.6186 | 508.2878  |
| V       | 1161.6870 | 421.2558  |
| F       | 1308.7554 | 322.1874  |
| R       | 1464.8565 | 175.1190  |

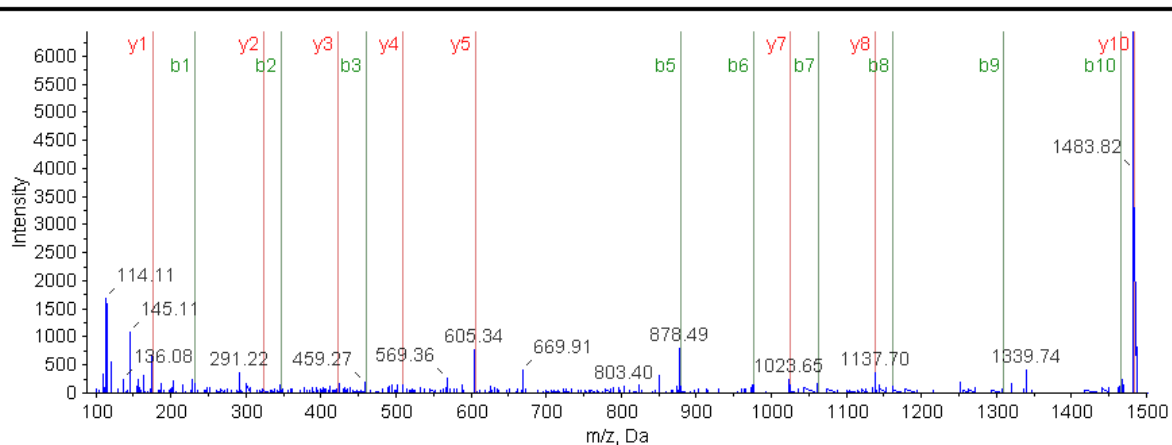

Q72LY3

IT4 | SMGK[IT4]PGLPPEDQDQYR

| Residue | b         | y         |
|---------|-----------|-----------|
| S       | 232.1414  | 2106.0528 |
| M       | 363.1819  | 1874.9187 |
| G       | 420.2033  | 1743.8782 |
| K[IT4]  | 692.4003  | 1686.8568 |
| P       | 789.4531  | 1414.6597 |
| G       | 846.4746  | 1317.6070 |
| L       | 959.5586  | 1260.5855 |
| P       | 1056.6114 | 1147.5014 |
| P       | 1153.6642 | 1050.4487 |
| E       | 1282.7068 | 953.3959  |
| D       | 1397.7337 | 824.3533  |
| Q       | 1525.7923 | 709.3264  |
| D       | 1640.8192 | 581.2678  |
| Q       | 1768.8778 | 466.2409  |

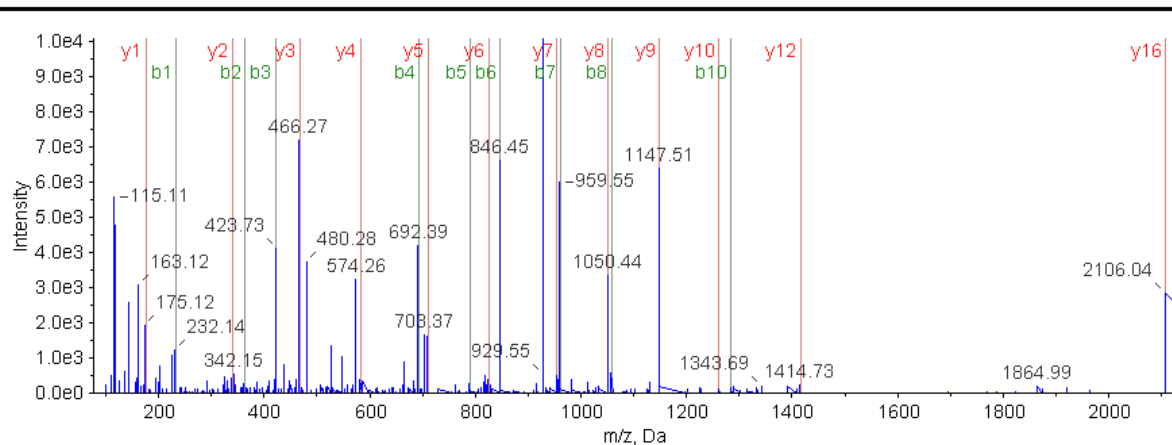



**Figure S1** Annotated MS/MS spectra for single peptide represented proteins. Modifications for individual amino acids are displayed in square brackets. The modification names follow the HUPO-PSI Modification Nomenclature for Mass Spectrometry standard (<http://www.unimod.org>).
