# Supplementary material
Source: PubMed Central journal article supplement (PMC2757032)
Supplement: pr9004597_si_002.pdf [file pr9004597_si_002.pdf]

Q72R58

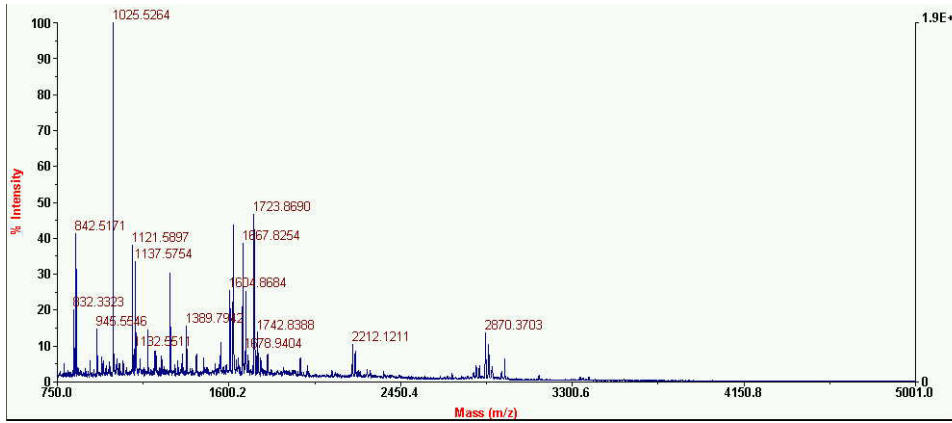

Q72MY9

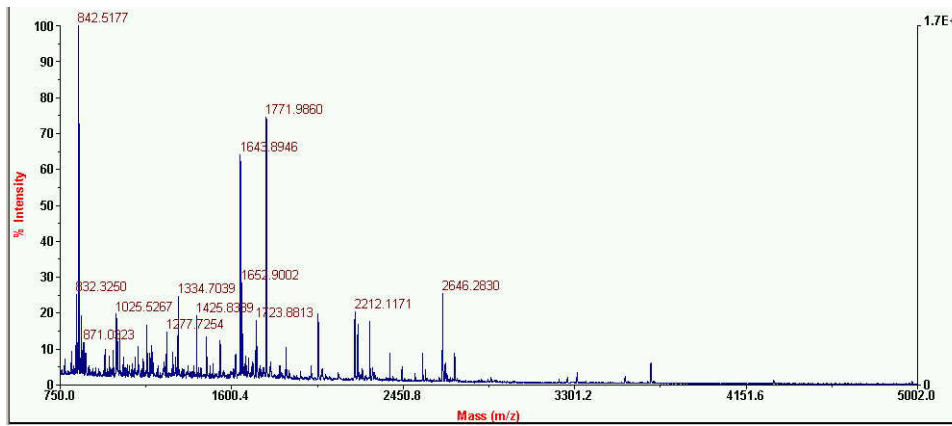

Q72MM7

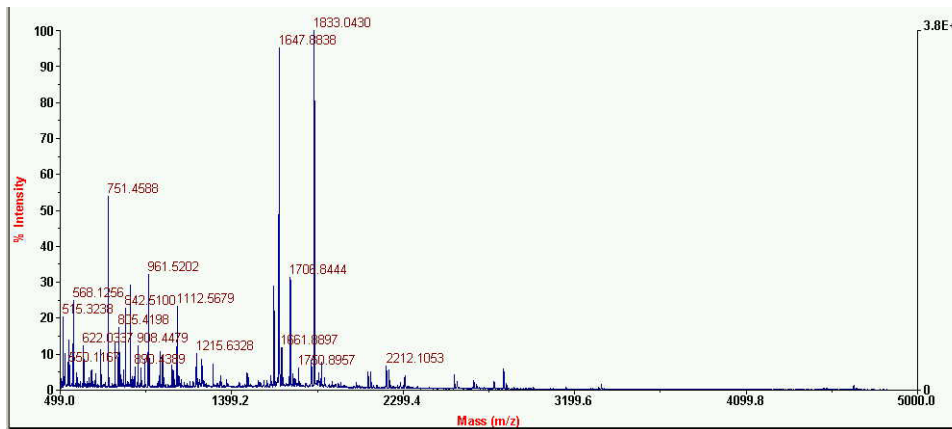

Q72VD7

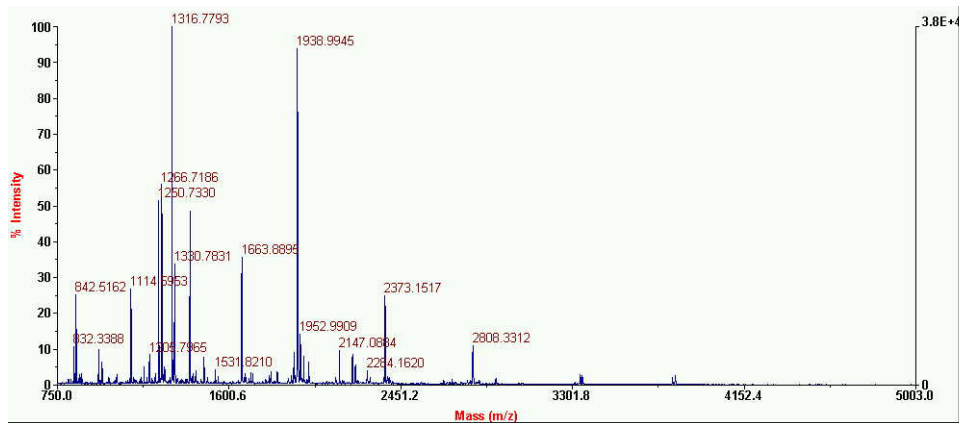

CH10\_LEPIC

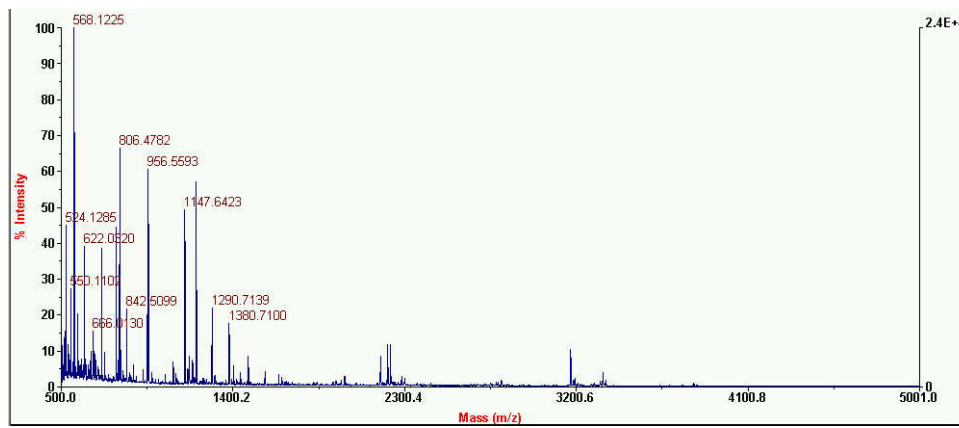

Q72QA2

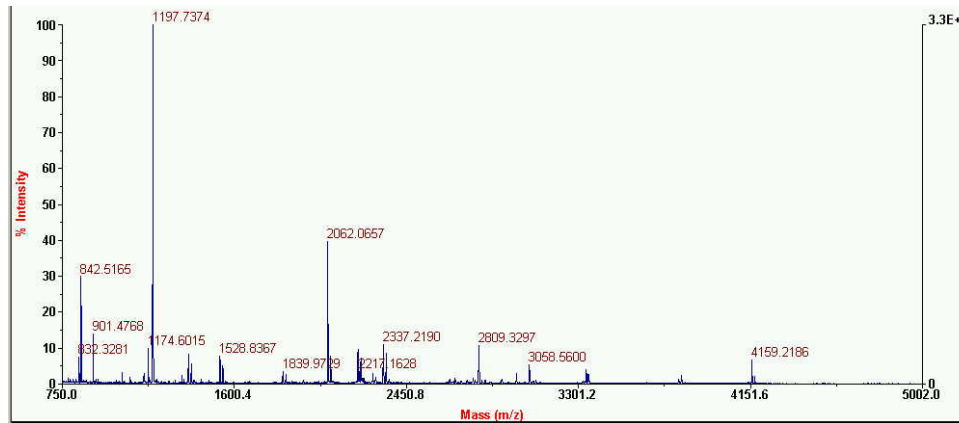

Q72RU5

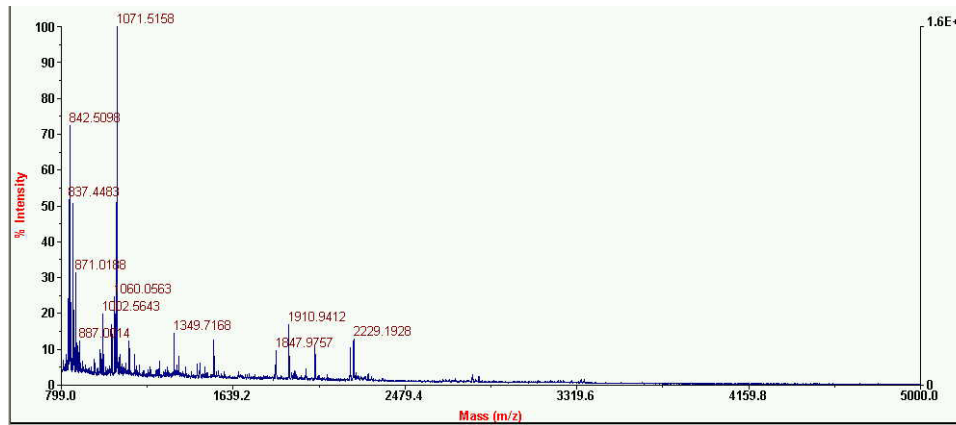

**Figure S2** Annotated mass spectra used for identification of proteins in 2DGE experiments. Displayed are raw spectra. To obtain peptide mass fingerprint lists spectra were baseline corrected, noise removed, deisotoped and two point internally calibrated using trypsin peaks. Peak % intensity used for generating the final mass list ranged from a minimum of 4 to 12%.
