# Supplementary material
Source: PubMed Central journal article supplement (PMC2757032)
Supplement: pr9004597_si_003.pdf [file pr9004597_si_003.pdf]

**A**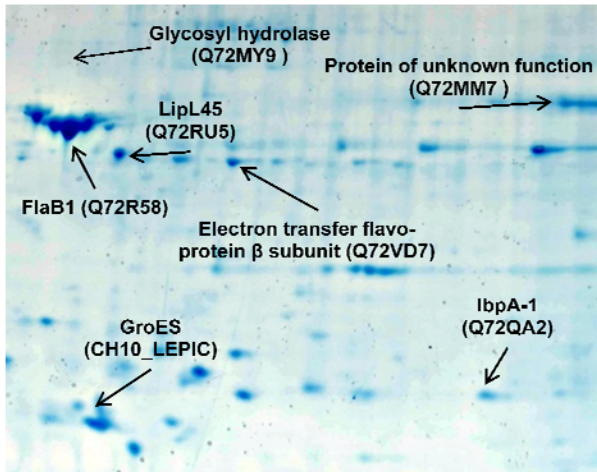**B**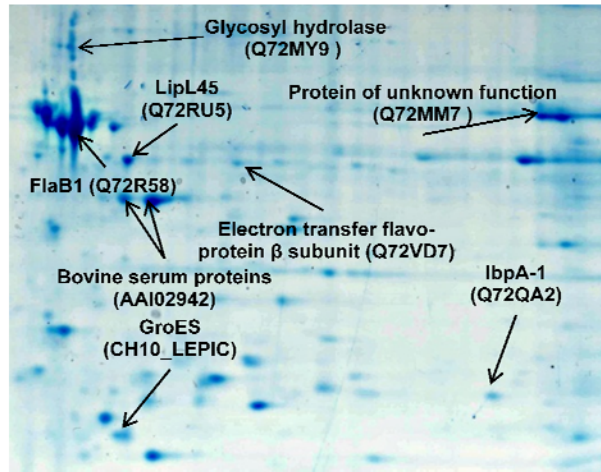

**Figure S3** Protein regulation in *Leptospira* in response to culture shift to 37°C and to media containing -Fe/FBS media as determined by 2DGE. *Leptospira* shifted to unmodified EMJH media at 37°C (A) or to -Fe/FBS media at 37°C (B). Protein expression changes were determined qualitatively using LipL45<sup>14</sup> as a reference point for proteins not altered in expression.
