# Supplementary material
Source: PubMed Central journal article supplement (PMC2757032)
Supplement: pr9004597_si_004.pdf [file pr9004597_si_004.pdf]

**Table S1** *Leptospira* proteins identified through iTRAQ analyses.

| UniProtKB ID | ORF      | Synonym | Protein Identification                                      | Putative Function                   | COG         | EC Number | Predicted Location | Predicted pI | Predicted MW |
|--------------|----------|---------|-------------------------------------------------------------|-------------------------------------|-------------|-----------|--------------------|--------------|--------------|
| Q72W82       | LIC10055 | CysE    | Serine O-acetyltransferase                                  | Amino acid transport and metabolism | COG1045,E   | 2.3.1.30  | CYT                | 8.28         | 25678.9      |
| Q72W01       | LIC10140 | AroC    | Chorismate synthase                                         | Amino acid transport and metabolism | COG0082,E   | 4.2.3.5   | CYT                | 6.79         | 41573.9      |
| Q72VI7       | LIC10310 | GcvH    | Glycine dehydrogenase (decarboxylating), protein H          | Amino acid transport and metabolism | COG0509,E   | 1.4.4.2   | CYT                | 4.41         | 14118        |
| Q72V62       | LIC10440 | GlnK    | Nitrogen regulatory protein PII                             | Amino acid transport and metabolism | COG0347,E   |           | CYT                | 9.79         | 12761.8      |
| Q72V19       | LIC10484 | ThrC    | Threonine synthase                                          | Amino acid transport and metabolism | COG0498,E   | 4.2.3.1   | CYT                | 8.27         | 48665        |
| Q72UC6       | LIC10733 | PepB    | Leucyl aminopeptidase                                       | amino acid transport and metabolism | COG0260,E   | 3.4.11.-  | CYT                | 9.40         | 54048.5      |
| Q72U05       | LIC10859 | TrpB    | Tryptophan synthase beta chain                              | Amino acid transport and metabolism | COG0133,E   | 4.2.1.20  | CYT                | 9.49         | 43679.8      |
| Q72SH3       | LIC11409 |         | Thiamine pyrophosphate-requiring enzyme                     | Amino acid transport and metabolism | COG0028,E,H |           | CYT                | 6.46         | 62325.5      |
| Q72SH2       | LIC11410 | IlvH    | Acetolactate synthase, small subunit                        | Amino acid transport and metabolism | COG0440,E   | 2.2.1.6   | CYT                | 6.68         | 17864.7      |
| Q72RZ1       | LIC11597 | LeuA-3  | 2-isopropylmalate/homocitrate synthase                      | Amino acid transport and metabolism | COG0119,E   | 2.3.3.13  | CYT                | 6.36         | 57305.2      |
| Q72RL9       | LIC11726 | LeuA-2  | 2-isopropylmalate synthase                                  | Amino acid transport and metabolism | COG0119,E   | 4.1.3.12  | CYT                | 5.75         | 54946.5      |
| Q72RJ9       | LIC11746 | ArgC    | N-acetyl-gamma-glutamyl-phosphate reductase                 | Amino acid transport and metabolism | COG0002,E   | 1.2.1.38  | CYT                | 7.39         | 37781.4      |
| Q72RH8       | LIC11767 | ArgD    | Acetylornithine aminotransferase                            | Amino acid transport and metabolism | COG4992,E   | 2.6.1.11  | CYT                | 4.91         | 44866.1      |
| Q72RF5       | LIC11790 |         | Aspartate/tyrosine/aromatic aminotransferase                | Amino acid transport and metabolism | COG0436,E   |           | CYT                | 7.28         | 44154.5      |
| Q72RD3       | LIC11813 | Ggt     | Gamma-glutamyltransferase                                   | Amino acid transport and metabolism | COG0405,E   | 2.3.2.2   | PER                | 9.36         | 63498.8      |
| Q72RA8       | LIC11840 | ArgH    | Argininosuccinate lyase                                     | Amino acid transport and metabolism | COG0165,E   | 4.3.2.1   | CYT                | 6.69         | 53352.2      |
| Q72R96       | LIC11852 | MetY    | O-acetylhomoserine aminocarboxypropyltransferase            | Amino acid transport and metabolism | COG2873,E   | 2.5.1.49  | CYT                | 6.90         | 47468.1      |
| Q72QN1       | LIC12082 | CysK-2  | Cysteine synthase                                           | Amino acid transport and metabolism | COG0031,E   | 2.5.1.47  | CYT                | 8.70         | 33248.2      |
| Q72PY2       | LIC12335 | GlyA    | Glycine hydroxymethyltransferase                            | Amino acid transport and metabolism | COG0112,E   | 2.1.2.1   | CYT                | 8.10         | 44974.3      |
| Q72PR0       | LIC12407 | GlnA    | Glutamate--ammonia ligase                                   | Amino acid transport and metabolism | COG0174,E   | 6.3.1.2   | CYT                | 6.31         | 53106.9      |
| Q72P58       | LIC12618 | LysA    | Diaminopimelate decarboxylase                               | Amino acid transport and metabolism | COG0019,E   | 4.1.1.20  | CYT                | 6.41         | 46457.8      |
| Q72NQ9       | LIC12771 | ProA    | Glutamate-5-semialdehyde dehydrogenase                      | Amino acid transport and metabolism | COG0014,E   | 1.2.1.41  | CYT                | 6.88         | 45794.9      |
| Q72MN1       | LIC13162 | AroF    | 3-deoxy-D-arabino-heptulosonate 7-phosphate (DAHP) synthase | Amino acid transport and metabolism | COG2876,E   | 2.5.1.54  | CYT                | 6.80         | 42396.5      |
| P61524       | LIC13324 | ArgG    | Argininosuccinate synthase                                  | Amino acid transport and metabolism | COG0137,E   | 6.3.4.5   | CYT                | 6.65         | 45074.6      |
| Q72M38       | LIC13353 | AofA    | Amine oxidase (flavin-containing)                           | Amino acid transport and metabolism | COG1231,E   | 1.4.3.4   | IM                 | 9.18         | 49194.1      |

|        |          |        |                                                        |                                                                                |             |          |         |      |         |
|--------|----------|--------|--------------------------------------------------------|--------------------------------------------------------------------------------|-------------|----------|---------|------|---------|
| Q75F15 | LIC20204 | CsdB   | Selenocysteine lyase                                   | Amino acid transport and metabolism                                            | COG0520,E   | 4.4.1.16 | CYT     | 5.16 | 43455.2 |
| Q72TC0 | LIC11101 | IlvD   | Dihydroxy-acid dehydratase                             | Amino acid transport and metabolism / Carbohydrate transport and metabolism    | COG0129,E,G | 4.2.1.9  | CYT     | 7.31 | 59415.6 |
| Q72U22 | LIC10842 | DapA   | Dihydrodipicolinate synthase/N-acetylneuraminate lyase | Amino acid transport and metabolism / Cell envelope biogenesis, outer membrane | COG0329,E,M |          | CYT     | 7.11 | 32035   |
| Q72US5 | LIC10582 | TrpE   | Anthranilate synthase (component I)                    | Amino acid transport and metabolism / Coenzyme metabolism                      | COG0147,E,H | 4.1.3.27 | CYT     | 4.76 | 52904.1 |
| Q72M00 | LIC13393 | IlvC   | Ketol-acid reductoisomerase                            | Amino acid transport and metabolism / Coenzyme metabolism                      | COG0059,E,H | 1.1.1.86 | CYT     | 6.63 | 36478.5 |
| Q75FE5 | LIC20249 | AcnA   | Aconitate hydratase                                    | carbohydrate metabolism, citric acid cycle                                     | COG1048,C   | 4.2.1.3  | CYT     | 6.84 | 81983.1 |
| Q72TV3 | LIC10913 | TktN   | Transketolase, N-terminal subunit                      | Carbohydrate Metabolism; Pentose phosphate pathway                             | COG3959,G   | 2.2.1.1  | CYT     | 7.34 | 30262.6 |
| Q72SM4 | LIC11355 | TktC   | Transketolase, C-terminal subunit                      | Carbohydrate transport and metabolism                                          | COG3958,G   |          | CYT     | 6.87 | 34782   |
| Q72RT8 | LIC11652 | MipB   | Transaldolase                                          | Carbohydrate transport and metabolism                                          | COG0176,G   |          | CYT     | 4.84 | 23490.2 |
| Q72RH9 | LIC11766 | ManB-2 | Phosphomannomutase                                     | Carbohydrate transport and metabolism                                          | COG1109,G   | 5.4.2.8  | CYT     | 9.97 | 65038.2 |
| Q72QZ8 | LIC11954 | Eno    | Enolase                                                | Carbohydrate transport and metabolism                                          | COG0148,G   | 4.2.1.11 | CYT     | 6.44 | 47044.4 |
| Q75FD0 | LIC20264 | PykF   | Pyruvate kinase                                        | Carbohydrate transport and metabolism                                          | COG0469,G   | 2.7.1.40 | CYT     | 6.34 | 54101.4 |
| Q72SW4 | LIC11258 | MreB   | Actin-like ATPase involved in cell morphogenesis       | Cell division and chromosome partitioning                                      | COG1077,D   |          | CYT     | 5.08 | 36835.6 |
| Q72UQ0 | LIC10607 |        | Pyridoxal-phosphate-dependent aminotransferase         | Cell envelope biogenesis, outer membrane                                       | COG0399,M   |          | CYT     | 6.53 | 41487.4 |
| Q72U07 | LIC10857 |        | Zinc metalloprotease                                   | Cell envelope biogenesis, outer membrane                                       | COG0750,M   |          | IM      | 6.07 | 63974.1 |
| P61656 | LIC11541 | KdsA   | 3-deoxy-8-phosphooctulonate synthase                   | Cell envelope biogenesis, outer membrane                                       | COG2877,M   | 2.5.1.55 | CYT     | 7.46 | 31948.6 |
| Q72QC5 | LIC12187 |        | pyridoxal-phosphate-dependent aminotransferase         | Cell envelope biogenesis, outer membrane                                       | COG0399,M   |          | CYT     | 7.05 | 39928.6 |
| Q72Q63 | LIC12250 | Prc-1  | Periplasmic protease                                   | Cell envelope biogenesis, outer membrane                                       | COG0793,M   | 3.4.21.- | NON-CYT | 7.81 | 67753.2 |
| Q72P56 | LIC12620 |        | Membrane carboxypeptidase/Penicillin-binding protein   | Cell envelope biogenesis, outer membrane                                       | COG5009,M   |          | IM      | 8.33 | 93430   |
| Q72MD8 | LIC13250 | Lnt    | Apolipoprotein N-acyltransferase                       | Cell envelope biogenesis, outer membrane                                       | COG0815,M   | 2.3.1.-  | IM      | 9.81 | 70742.2 |
| Q72UN4 | LIC10623 | MotB-1 | Endoflagellar motor protein                            | Cell motility and secretion                                                    | COG1360,N   |          | IM      | 7.14 | 30275.7 |
| Q72U75 | LIC10787 | FlaA-2 | Endoflagellar filament sheath protein                  | Cell motility and secretion                                                    |             |          | PER     | 9.46 | 27179.9 |
| Q72U74 | LIC10788 | FlaA-1 | Endoflagellar filament sheath protein                  | Cell motility and secretion                                                    |             |          | PER     | 8.03 | 34888.6 |
| Q72SK9 | LIC11370 | FliN-1 | Endoflagellar motor switch protein                     | Cell motility and secretion                                                    | COG1886,N,U |          | CYT     | 4.33 | 36833.9 |
| Q72SK8 | LIC11371 | FliO   | Endoflagellar biogenesis protein                       | Cell motility and secretion                                                    | COG3190,N   |          | IM      | 8.93 | 30038.1 |
| Q72S96 | LIC11488 | CheX   | Inhibitor of MCP methylation                           | Cell motility and secretion                                                    | COG1406,N   |          | CYT     | 4.74 | 16724.3 |
| Q72S55 | LIC11531 | FlaB-1 | Endoflagellar filament core protein                    | Cell motility and secretion                                                    | COG1344,N   |          | PER     | 7.91 | 31470.8 |
| Q72S54 | LIC11532 | FlgL-1 | Endoflagellar hook-filament protein                    | Cell motility and secretion                                                    | COG1344,N   |          | PER     | 7.76 | 31318.4 |
| Q72RN2 | LIC11713 |        | Endoflagellar motor protein                            | Cell motility and secretion                                                    | COG1360,N   |          | IM      | 6.98 | 39641   |
| Q72R59 | LIC11889 | FlaB-2 | Endoflagellar filament core protein                    | Cell motility and secretion                                                    | COG1344,N   |          | PER     | 9.26 | 31257.5 |
| Q72R58 | LIC11890 | FlaB1  | Endoflagellar filament core protein                    | Cell motility and secretion                                                    | COG1344,N   |          | PER     | 7.10 | 31305.4 |
| Q72NA5 | LIC12931 | MotA-2 | Endoflagellar motor protein                            | Cell motility and secretion                                                    | COG1291,N   |          | IM      | 7.55 | 26499.8 |

|        |          |        |                                                                      |                                                              |             |          |         |       |         |
|--------|----------|--------|----------------------------------------------------------------------|--------------------------------------------------------------|-------------|----------|---------|-------|---------|
| Q72MY3 | LIC13056 | MotB-3 | Endoflagellar motor protein                                          | Cell motility and secretion                                  | COG1360,N   |          | IM      | 9.34  | 24903.7 |
| Q72W94 | LIC10043 |        | Methyl-accepting chemotaxis protein                                  | Cell motility and secretion / Signal transduction mechanisms | COG0840,N,T |          | IM      | 5.89  | 62867.6 |
| Q72T06 | LIC11216 |        | Methyl-accepting chemotaxis protein                                  | Cell motility and secretion / Signal transduction mechanisms | COG0840,N,T |          | IM      | 4.70  | 63729.7 |
| Q72S63 | LIC11523 |        | Methyl-accepting chemotaxis protein                                  | Cell motility and secretion / Signal transduction mechanisms | COG0840,N,T |          | IM      | 5.44  | 108395  |
| Q72NB4 | LIC12921 |        | Methyl-accepting chemotaxis protein                                  | Cell motility and secretion / Signal transduction mechanisms | COG0840,N,T |          | NON-CYT | 4.98  | 76737.1 |
| Q72LZ9 | LIC13394 |        | Methyl-accepting chemotaxis protein                                  | Cell motility and secretion / Signal transduction mechanisms | COG0840,N,T |          | IM      | 7.17  | 59325.8 |
| Q72MM5 | LIC13168 | Gmd    | GDP-mannose 4,6-dehydratase                                          | cell wall biosynthesis                                       | COG1089,M   | 4.2.1.47 | CYT     | 8.33  | 38155.5 |
| Q72SM5 | LIC11354 | MetK   | Methionine adenosyltransferase                                       | Coenzyme metabolism                                          | COG0192,H   | 2.5.1.6  | CYT     | 6.65  | 42033.6 |
| Q72MN0 | LIC13163 | PanB   | 3-methyl-2-oxobutanoate hydroxymethyltransferase                     | Coenzyme metabolism                                          | COG0413,H   | 2.1.2.11 | CYT     | 5.65  | 28913.3 |
| Q72N21 | LIC13017 |        | Efflux pump, AcrB family                                             | Defense mechanisms                                           | COG0841,V   |          | IM      | 9.22  | 121230  |
| Q72SA5 | LIC11479 | XerD   | Site-specific recombinase XerD                                       | DNA replication, recombination, and repair                   | COG4974,L   |          | CYT     | 9.29  | 35073.1 |
| Q72QK1 | LIC12112 | Ssb    | Single-stranded DNA-binding protein                                  | DNA replication, recombination, and repair                   | COG0629,L   |          | CYT     | 4.98  | 16408   |
| Q72M43 | LIC13348 |        | DNA topoisomerase (ATP-hydrolyzing), subunit B                       | DNA replication, recombination, and repair                   | COG0187,L   | 5.99.1.3 | CYT     | 9.11  | 81524.3 |
| Q72VY3 | LIC10162 | FumC   | Fumarate hydratase                                                   | Energy production and conversion                             | COG0114,C   | 4.2.1.2  | CYT     | 6.93  | 50396.4 |
| Q72VD8 | LIC10360 | EtfA   | Electron transfer flavoprotein, alpha subunit                        | Energy production and conversion                             | COG2025,C   |          | CYT     | 9.21  | 32736.3 |
| Q72T20 | LIC10874 |        | Fe-S-cluster-containing hydrogenase                                  | Energy production and conversion                             | COG0437,C   |          | CYT     | 8.40  | 112671  |
| Q72TQ9 | LIC10958 |        | Zinc-binding alcohol dehydrogenase                                   | Energy production and conversion                             | COG0604,C   |          | CYT     | 7.25  | 36756.4 |
| Q72SY5 | LIC11237 | AtpB   | A Subunit of the H(+)-transporting two-sector ATPase, F0 sector      | Energy production and conversion                             | COG0356,C   | 3.6.3.14 | IM      | 6.88  | 39486.7 |
| Q72SY4 | LIC11238 | AtpE   | C subunit of the H(+)-transporting two-sector ATPase, F0 sector      | Energy production and conversion                             | COG0636,C   | 3.6.3.14 | IM      | 7.54  | 9678.24 |
| Q72SY3 | LIC11239 | AtpF   | B subunit of the H(+)-transporting two-sector ATPase, FO sector      | Energy production and conversion                             | COG0711,C   | 3.6.3.14 | IM      | 5.16  | 19042.3 |
| Q72SY2 | LIC11240 | AtpH   | Delta subunit of the H(+)-transporting two-sector ATPase, F1 sector  | Energy production and conversion                             | COG0712,C   | 3.6.3.14 | CYT     | 9.33  | 20751   |
| Q72SY1 | LIC11241 | AtpA   | Alpha subunit of the H(+)-transporting two-sector ATPase, F1 sector  | Energy production and conversion                             | COG0056,C   | 3.6.3.14 | CYT     | 5.48  | 55013.2 |
| Q72SY0 | LIC11242 | AtpG   | Gamma subunit of the H(+)-transporting two-sector ATPase, F1 sector  | Energy production and conversion                             | COG0224,C   | 3.6.3.14 | CYT     | 10.24 | 31719.7 |
| Q72SX9 | LIC11243 | AtpD   | Beta subunit of the H(+)-transporting two-sector ATPase, F1 sector   | Energy production and conversion                             | COG0055,C   | 3.6.3.14 | CYT     | 5.54  | 50565.6 |
| Q72RR8 | LIC11674 |        | Alkylglycerone-phosphate synthase                                    | Energy production and conversion                             | COG0277,C   | 2.5.1.26 | CYT     | 9.62  | 64072.2 |
| Q72RP5 | LIC11699 | GlpA-1 | Glycerol-3-phosphate dehydrogenase                                   | Energy production and conversion                             | COG0578,C   | 1.1.99.5 | CYT     | 9.72  | 61772.4 |
| P61975 | LIC11781 | Mdh    | Malate dehydrogenase                                                 | Energy production and conversion                             | COG0039,C   | 1.1.1.37 | CYT     | 7.45  | 34918   |
| Q72R51 | LIC11897 | AcoA   | Pyruvate dehydrogenase (lipoamide), alpha subunit                    | Energy production and conversion                             | COG1071,C   | 1.2.4.1  | CYT     | 6.76  | 36747.6 |
| Q72R50 | LIC11898 | AcoB   | Pyruvate dehydrogenase (lipoamide), beta subunit                     | Energy production and conversion                             | COG0022,C   | 1.2.4.1  | CYT     | 4.58  | 35744.8 |
| Q72R23 | LIC11928 |        | FAD/FMN-containing dehydrogenase                                     | Energy production and conversion                             | COG0277,C   |          | CYT     | 10.04 | 56818   |
| Q72QV6 | LIC12002 | SdhA   | Succinate dehydrogenase/fumarate reductase subunit A                 | Energy production and conversion                             | COG1053,C   | 1.3.99.1 | PER     | 8.60  | 70442.4 |
| Q72QV5 | LIC12003 | SdhB   | Succinate dehydrogenase/fumarate reductase subunit B                 | Energy production and conversion                             | COG0479,C   | 1.3.99.1 | CYT     | 6.64  | 26649.6 |
| Q72Q29 | LIC12285 |        | Inorganic pyrophosphatase                                            | Energy production and conversion                             | COG3808,C   |          | IM      | 5.56  | 73105.5 |
| Q72PJ7 | LIC12474 | SucA   | Oxoglutarate dehydrogenase (lipoamide), dehydrogenase (E1) component | Energy production and conversion                             | COG0567,C   | 1.2.4.2  | CYT     | 6.49  | 103921  |
| Q72PJ6 | LIC12475 | LpdA-1 | Dihydrolipoamide dehydrogenase                                       | Energy production and conversion                             | COG1249,C   | 1.8.1.4  | CYT     | 7.15  | 50216.9 |
| Q72PA2 | LIC12573 | SucC   | Succinyl-CoA synthetase, beta subunit                                | Energy production and conversion                             | COG0045,C   | 6.2.1.5  | CYT     | 5.73  | 41890.3 |
| Q72PA1 | LIC12574 | SucD   | Succinyl-CoA synthetase, alpha subunit                               | Energy production and conversion                             | COG0074,C   | 6.2.1.5  | CYT     | 8.61  | 30193.1 |
| Q72NS9 | LIC12750 | NuoL   | NADH dehydrogenase (ubiquinone), L chain                             | Energy production and conversion                             | COG1009,C,P | 1.6.5.3  | IM      | 9.33  | 71217.5 |

|        |          |         |                                                                                 |                                                                                  |             |          |         |       |         |
|--------|----------|---------|---------------------------------------------------------------------------------|----------------------------------------------------------------------------------|-------------|----------|---------|-------|---------|
| Q72NK5 | LIC12829 | GlitA-1 | Citrate (Si)-synthase                                                           | Energy production and conversion                                                 | COG0372,C   | 2.3.3.1  | CYT     | 7.10  | 48237.5 |
| Q72NB1 | LIC12925 | GlitA-2 | Citrate synthase                                                                | Energy production and conversion                                                 | COG0372,C   | 2.3.3.1  | CYT     | 8.27  | 48525.2 |
| Q72MG4 | LIC13223 |         | Inorganic pyrophosphatase                                                       | Energy production and conversion                                                 | COG0221,C   |          | CYT     | 4.94  | 20444.5 |
| Q72ME4 | LIC13244 | lcdA    | Isocitrate dehydrogenase                                                        | Energy production and conversion                                                 | COG0538,C   | 1.1.1.-  | CYT     | 6.80  | 44762.1 |
| Q72LT0 | LIC13470 |         | Reductase                                                                       | Energy production and conversion                                                 | COG0369,P   |          | CYT     | 8.06  | 34435.4 |
| Q72NI8 | LIC12846 | RpoA    | DNA-directed RNA polymerase, alpha subunit                                      | Genetic Information Processing;<br>Transcription; RNA polymerase                 | COG0202,K   | 2.7.7.6  | CYT     | 4.57  | 36686.5 |
| Q72SG2 | LIC11421 |         | Phosphate permease                                                              | Inorganic ion transport and metabolism                                           | COG0306,P   |          | IM      | 10.05 | 84071.6 |
| Q72RN3 | LIC11712 | MgtE    | Magnesium transporter                                                           | Inorganic ion transport and metabolism                                           | COG2239,P   |          | IM      | 4.53  | 51727.5 |
| Q72QS7 | LIC12032 | KatE    | Catalase                                                                        | Inorganic ion transport and metabolism                                           | COG0753,P   | 1.11.1.6 | CYT     | 8.62  | 54676.4 |
| Q72PI5 | LIC12486 |         | Membrane protein related to TerC                                                | Inorganic ion transport and metabolism                                           | COG0861,P   |          | IM      | 9.81  | 26146.2 |
| Q72SR5 | LIC11310 | Bfr     | Bacterioferritin (cytochrome b1)                                                | inorganic iron binding                                                           | COG2193,P   |          | CYT     | 4.49  | 18123.7 |
| Q72S17 | LIC11570 | GspD    | Type II secretory pathway component, protein D                                  | Intracellular trafficking and secretion                                          | COG1450,N,U |          | IM      | 8.92  | 66464.3 |
| Q72S14 | LIC11573 | GspG    | Type II secretory pathway component, protein G                                  | Intracellular trafficking and secretion                                          | COG2165,N,U |          | NON-CYT | 8.70  | 17877.4 |
| Q72RW7 | LIC11621 |         | Biopolymer transport protein, TolQ-like                                         | Intracellular trafficking and secretion                                          | COG0811,U   |          | IM      | 5.38  | 22022.8 |
| Q72RW6 | LIC11622 |         | ExbD-related biopolymer transport protein                                       | Intracellular trafficking and secretion                                          | COG0848,U   |          | NON-CYT | 10.35 | 16660.4 |
| Q72R08 | LIC11944 | SecA    | Preprotein translocase, SecA subunit                                            | Intracellular trafficking and secretion                                          | COG0653,U   |          | CYT     | 6.63  | 103529  |
| Q72QX8 | LIC11980 | TatA    | Sec-independent protein secretion pathway component                             | Intracellular trafficking and secretion                                          | COG1826,U   |          | NON-CYT | 10.26 | 9301.68 |
| Q72QL8 | LIC12095 | SecG    | Preprotein translocase, SecG subunit                                            | Intracellular trafficking and secretion                                          | COG1314,U   |          | IM      | 6.77  | 11700.7 |
| Q72PD4 | LIC12537 | SecF    | Preprotein translocase, SecF subunit                                            | Intracellular trafficking and secretion                                          | COG0341,U   |          | IM      | 6.13  | 34318.8 |
| Q72PD3 | LIC12538 | SecD    | Preprotein translocase, SecD subunit                                            | Intracellular trafficking and secretion                                          | COG0342,U   |          | IM      | 8.67  | 72161.5 |
| Q72PD1 | LIC12540 | YajC    | Preprotein translocase, YajC subunit                                            | Intracellular trafficking and secretion                                          | COG1862,U   |          | NON-CYT | 9.63  | 12060.1 |
| Q72NI1 | LIC12853 | SecY    | Preprotein translocase, SecY subunit                                            | Intracellular trafficking and secretion                                          | COG0201,U   |          | IM      | 10.01 | 50851.4 |
| Q72MZ3 | LIC13046 | LpxD-2  | UDP-3-O-[3-hydroxymyristoyl] glucosamine N-acyltransferase                      | Lipid A biosynthesis; third step                                                 | COG1044,M   | 2.3.1.-  | CYT     | 6.95  | 36859.7 |
| Q72W46 | LIC10094 | FadD    | Long-chain-fatty-acid--CoA ligase                                               | Lipid metabolism                                                                 | COG1022,I   | 6.2.1.3  | CYT     | 9.57  | 77005.5 |
| Q72VA5 | LIC10396 | PaaJ-4  | Acetyl-CoA C-acetyltransferase                                                  | Lipid metabolism                                                                 | COG0183,I   | 2.3.1.9  | CYT     | 7.43  | 41046.2 |
| Q72UU2 | LIC10565 | CaiD-3  | Enoyl-CoA hydratase                                                             | Lipid metabolism                                                                 | COG1024,I   |          | CYT     | 6.55  | 28723.4 |
| Q72US4 | LIC10583 |         | Acyl-CoA dehydrogenase                                                          | Lipid Metabolism                                                                 | COG1960,I   |          | CYT     | 6.19  | 42787.1 |
| Q72TP7 | LIC10970 |         | Acyl-CoA dehydrogenase                                                          | Lipid metabolism                                                                 | COG1960,I   |          | CYT     | 6.77  | 42596.4 |
| Q72TP3 | LIC10974 | PaaJ-2  | Acetyl-CoA acetyltransferase                                                    | Lipid metabolism                                                                 | COG0183,I   | 2.3.1.9  | CYT     | 6.79  | 42957.1 |
| Q72SM9 | LIC11350 | CaiA-3  | Acyl-CoA dehydrogenase                                                          | Lipid metabolism                                                                 | COG1960,I   | 1.3.99.- | CYT     | 5.62  | 65217.4 |
| Q72SM0 | LIC11359 | MaoC    | Acyl dehydratase                                                                | Lipid metabolism                                                                 | COG2030,I   |          | CYT     | 7.32  | 44035.2 |
| Q72S69 | LIC11517 | AccA    | Acetyl-CoA carboxylase, carboxyltransferase component (subunits alpha and beta) | Lipid metabolism                                                                 | COG4799,I   | 6.4.1.2  | CYT     | 6.52  | 60320.5 |
| Q72S68 | LIC11518 | AccC-2  | Biotin carboxylase subunit of acetyl CoA carboxylase                            | Lipid metabolism                                                                 | COG4770,I   |          | CYT     | 6.64  | 102167  |
| Q72RV8 | LIC11630 |         | Long-chain-fatty-acid--CoA ligase                                               | Lipid metabolism                                                                 | COG1022,I   | 6.2.1.3  | CYT     | 9.00  | 76147.7 |
| Q72RS0 | LIC11672 | CaiD-2  | Enoyl-CoA hydratase/carnithine racemase                                         | Lipid metabolism                                                                 | COG1024,I   | 4.2.1.-  | CYT     | 7.50  | 28603.1 |
| Q72PH6 | LIC12495 |         | Enoyl-CoA hydratase/isomerase family protein                                    | Lipid metabolism                                                                 | COG1024,I   |          | CYT     | 5.52  | 27586.8 |
| Q72PC9 | LIC12542 | PgsA-1  | CDP-diacylglycerol--glycerol-3-phosphate 3-phosphatidyltransferase              | Lipid metabolism                                                                 | COG0558,I   | 2.7.8.5  | IM      | 10.23 | 28118.3 |
| Q72P47 | LIC12629 |         | Enoyl-CoA hydratase                                                             | Lipid metabolism                                                                 | COG1024,I   | 4.2.1.17 | CYT     | 6.53  | 30572.9 |
| Q72NN7 | LIC12795 | PaaJ-1  | Acetyl-CoA acetyltransferase                                                    | Lipid metabolism                                                                 | COG0183,I   | 2.3.1.9  | CYT     | 6.33  | 47280.2 |
| Q72N29 | LIC13009 |         | Acyl-CoA dehydrogenase                                                          | Lipid metabolism                                                                 | COG1960,I   |          | CYT     | 5.79  | 61463.8 |
| Q72M90 | LIC13300 | FadB    | 3-hydroxyacyl-CoA dehydrogenase                                                 | Lipid metabolism                                                                 | COG1250,I   | 1.1.1.35 | CYT     | 9.09  | 47837.9 |
| Q72M89 | LIC13301 | PaaJ-5  | Acetyl-CoA acetyltransferase                                                    | Lipid metabolism                                                                 | COG0183,I   | 2.3.1.9  | CYT     | 8.26  | 45838.1 |
| Q72M72 | LIC13318 | FabD    | [Acyl-carrier protein] S-malonyltransferase                                     | Lipid metabolism                                                                 | COG0331,I   | 2.3.1.39 | CYT     | 6.33  | 42463.4 |
| Q75FX3 | LIC20058 | MeaA    | Methylmalonyl-CoA mutase                                                        | Lipid metabolism                                                                 | COG2185,I   | 5.4.99.2 | CYT     | 5.42  | 74877.5 |
| Q75FW6 | LIC20065 | AcpP    | Acyl carrier protein                                                            | Lipid metabolism / Secondary metabolites biosynthesis, transport, and catabolism | COG0236,I,Q |          | CYT     | 3.63  | 8502.39 |

|        |          |        |                                                                |                                                                                                        |             |           |         |       |         |
|--------|----------|--------|----------------------------------------------------------------|--------------------------------------------------------------------------------------------------------|-------------|-----------|---------|-------|---------|
| Q75G05 | LIC20010 | HemB   | Delta-aminolevulinic acid dehydratase                          | metabolism of cofactors and vitamins, porphyrin and chlorophyll                                        | COG0113,H   | 4.2.1.24  | CYT     | 7.61  | 35221.9 |
| Q75G04 | LIC20011 | HemL   | Glutamate-1-semialdehyde aminotransferase                      | metabolism of cofactors and vitamins, porphyrin and chlorophyll                                        | COG0001,H   | 5.4.3.8   | CYT     | 8.07  | 48526.5 |
| Q72NI2 | LIC12852 | Adk    | Adenylate kinase                                               | Metabolism; Nucleotide Metabolism; Purine metabolism                                                   | COG0563,F   | 2.7.4.3   | CYT     | 6.75  | 20593.7 |
| Q72W72 | LIC10065 | Dcd    | dCTP deaminase                                                 | Nucleotide transport and metabolism                                                                    | COG0717,F   | 3.5.4.13  | CYT     | 6.52  | 19527.6 |
| Q72S00 | LIC11587 | NrdA   | Ribonucleoside-triphosphate reductase, alpha subunit           | Nucleotide transport and metabolism                                                                    | COG0209,F   | 1.17.4.2  | CYT     | 6.45  | 133918  |
| Q72R32 | LIC11919 | ImdH   | Inosine-5'-monophosphate dehydrogenase                         | Nucleotide transport and metabolism                                                                    | COG0516,F   | 1.1.1.205 | CYT     | 8.65  | 55880.8 |
| Q72LZ4 | LIC13399 |        | Purine-nucleoside phosphorylase                                | Nucleotide transport and metabolism                                                                    | COG0005,F   | 2.4.2.-   | CYT     | 7.18  | 32069   |
| Q72W26 | LIC10115 |        | Protein-disulfide isomerase                                    | Posttranslational modification, protein turnover, chaperones                                           | COG1651,O   |           | IM      | 8.38  | 43738.6 |
| Q72VT7 | LIC10209 | CyoB   | Cytochrome C oxidase, subunit I                                | Posttranslational modification, protein turnover, chaperones                                           | COG0843,C   | 1.10.3.-  | IM      | 9.12  | 59012.5 |
| Q72V70 | LIC10432 |        | ATP-dependent Zn protease                                      | Posttranslational modification, protein turnover, chaperones                                           | COG0465,O   | 3.4.24.-  | IM      | 8.88  | 72543.6 |
| P61444 | LIC10525 | GrpE   | Chaperone protein, GrpE                                        | Posttranslational modification, protein turnover, chaperones                                           | COG0576,O   |           | CYT     | 4.36  | 24231.6 |
| Q72UP9 | LIC10608 | Lon    | Endopeptidase La                                               | Posttranslational modification, protein turnover, chaperones                                           | COG0466,O   | 3.4.21.53 | IM      | 9.41  | 94786.2 |
| Q72T03 | LIC11219 | AhpC   | Peroxiredoxin                                                  | Posttranslational modification, protein turnover, chaperones                                           | COG0450,O   | 1.6.4.-   | CYT     | 5.87  | 21516.8 |
| Q72SG7 | LIC11416 |        | FKBP-type peptidyl-prolyl cis-trans isomerase (trigger factor) | Posttranslational modification, protein turnover, chaperones                                           | COG0544,O   |           | CYT     | 5.48  | 52144.9 |
| Q72SG6 | LIC11417 | ClpP-1 | Protease subunit of endopeptidase Clp                          | Posttranslational modification, protein turnover, chaperones                                           | COG0740,O,U | 3.4.21.92 | CYT     | 5.74  | 22112.2 |
| Q72SF9 | LIC11424 |        | FKBP-type peptidyl-prolyl cis-trans isomerase                  | Posttranslational modification, protein turnover, chaperones                                           | COG0545,O   |           | NON-CYT | 10.26 | 14003.3 |
| Q72RY8 | LIC11600 | HslV   | ATP-dependent protease HslVU (ClpYQ), peptidase subunit        | Posttranslational modification, protein turnover, chaperones                                           | COG5405,O   |           | CYT     | 7.41  | 19584.4 |
| Q72QU2 | LIC12017 | ClpA-1 | Endopeptidase Clp, ATP-dependent proteolytic subunit           | Posttranslational modification, protein turnover, chaperones                                           | COG0542,O   | 3.4.21.92 | CYT     | 6.36  | 96325   |
| Q72NM1 | LIC12812 |        | Trypsin-like serine protease                                   | Posttranslational modification, protein turnover, chaperones                                           | COG0265,O   |           | PER     | 8.89  | 41115   |
| Q75FY7 | LIC20044 | HtpG   | HSP90 molecular chaperone                                      | Posttranslational modification, protein turnover, chaperones                                           | COG0326,O   |           | CYT     | 5.13  | 69753.1 |
| Q75FI7 | LIC20197 |        | Cysteine protease                                              | Posttranslational modification, protein turnover, chaperones                                           | COG4870,O   |           | NON-CYT | 8.98  | 87780.8 |
| Q72QY0 | LIC11978 | TrxA   | Thioredoxin                                                    | Posttranslational modification, protein turnover, chaperones / Energy production and conversion        | COG3118,O   |           | CYT     | 4.62  | 11369.1 |
| Q72R01 | LIC11951 | ClpP-2 | Protease subunit of an ATP-dependent Clp protease              | Posttranslational modification, protein turnover, chaperones / Intracellular trafficking and secretion | COG0740,O,U | 3.4.21.92 | CYT     | 6.03  | 21635   |
| Q72MU7 | LIC13092 | SppA-3 | Periplasmic serine protease                                    | Posttranslational modification, protein turnover, chaperones / Intracellular trafficking and secretion | COG0616,O,U |           | PER     | 7.49  | 35093.2 |

|        |          |       |                                                                           |                                                               |             |          |     |       |         |
|--------|----------|-------|---------------------------------------------------------------------------|---------------------------------------------------------------|-------------|----------|-----|-------|---------|
| Q75FW7 | LIC20064 |       | Short chain dehydrogenase                                                 | Secondary metabolites biosynthesis, transport, and catabolism | COG4221,R   |          | CYT | 8.48  | 26062.9 |
| Q72TJ6 | LIC11025 |       | Anti-Sigma factor antagonist                                              | Signal transduction mechanism                                 | COG1366,T   |          | CYT | 5.78  | 12913.1 |
| Q72VQ9 | LIC10237 |       | cAMP-binding protein                                                      | Signal transduction mechanisms                                | COG0664,T   |          | CYT | 9.66  | 46125.4 |
| Q72VF3 | LIC10344 |       | AntiSigma factor antagonist, part (N-term)                                | Signal transduction mechanisms                                | COG1366,T   |          | CYT | 8.22  | 9649.04 |
| Q72U02 | LIC10862 |       | Adenylate cyclase related protein                                         | Signal transduction mechanisms                                | COG2114,T   |          | IM  | 5.25  | 87381   |
| Q72TW4 | LIC10900 |       | Adenylate/guanylate cyclase, part (N-term)                                | Signal transduction mechanisms                                | COG2114,T   |          | IM  | 9.49  | 52770.8 |
| Q72TW3 | LIC10901 |       | Adenylate/guanylate cyclase, part (C-term)                                | Signal transduction mechanisms                                | COG2114,T   |          | UNK | 10.59 | 15312.9 |
| Q72TL4 | LIC11004 |       | Anti-sigma factor antagonist                                              | Signal transduction mechanisms                                | COG1366,T   |          | CYT | 4.69  | 12439.2 |
| Q72SF2 | LIC11431 |       | cAMP-dependent protein kinase                                             | Signal transduction mechanisms                                | COG0664,T   |          | CYT | 6.25  | 18260.7 |
| Q72SE6 | LIC11437 |       | Adenylate cyclase related protein                                         | Signal transduction mechanisms                                | COG2114,T   |          | IM  | 4.91  | 106645  |
| Q72S40 | LIC11546 | HprK  | HPr Serine kinase                                                         | Signal transduction mechanisms                                | COG1493,T   | 2.7.1.-  | CYT | 6.92  | 36118.7 |
| Q72RN6 | LIC11709 |       | Sensor histidine kinase and response regulator of a two component complex | Signal transduction mechanisms                                | COG4251,T   |          | CYT | 5.54  | 95001   |
| Q72QY1 | LIC11977 |       | CAP family transcription factor                                           | Signal transduction mechanisms                                | COG0664,T   |          | CYT | 6.06  | 82641   |
| Q72PL6 | LIC12454 |       | Response regulator, receiver domain                                       | Signal transduction mechanisms                                | COG2204,T   |          | CYT | 5.25  | 13325.5 |
| Q75FK7 | LIC20175 | DksA  | DnaK suppressor protein                                                   | Signal transduction mechanisms                                | COG1734,T   |          | CYT | 4.71  | 16632.7 |
| Q75FU2 | LIC20089 |       | Serine phosphatase RsbU, regulator of sigma subunit                       | Signal transduction mechanisms / Transcription                | COG2208,T,K |          | CYT | 4.62  | 64925.9 |
| Q75FE0 | LIC20254 |       | Response regulator                                                        | Signal transduction mechanisms / Transcription                | COG0745,T,K |          | CYT | 5.49  | 27711.7 |
| Q72SK1 | LIC11380 |       | RNA polymerase sigma subunit                                              | Transcription                                                 | COG1191,K   |          | CYT | 4.96  | 30871.3 |
| P61540 | LIC11701 | RpoD  | DNA-directed RNA polymerase, sigma subunit (sigma70/sigma32)              | Transcription                                                 | COG0568,K   |          | CYT | 9.68  | 67873.1 |
| Q72P40 | LIC12636 | Rho   | Transcription termination factor Rho                                      | Transcription                                                 | COG1158,K   |          | CYT | 6.76  | 53790.1 |
| Q72NX2 | LIC12706 | NusA  | Transcription elongation factor                                           | Transcription                                                 | COG0195,K   |          | CYT | 4.74  | 50893.1 |
| Q75G28 | LIC20021 |       | ParB-like protein                                                         | Transcription                                                 | COG1475,K   |          | CYT | 10.48 | 26556.9 |
| Q72VM5 | LIC10272 |       | Protein-synthesizing GTPase complex, EF-G component                       | Translation, ribosomal structure and biogenesis               | COG0480,J   | 3.6.1.48 | CYT | 5.51  | 79001   |
| Q72V71 | LIC10431 | Pth-2 | Aminoacyl-tRNA hydrolase                                                  | Translation, ribosomal structure and biogenesis               | COG0193,J   | 3.1.1.29 | CYT | 5.10  | 20992   |
| Q72U13 | LIC10851 | Tsf   | Translation elongation factor Ts                                          | Translation, ribosomal structure and biogenesis               | COG0264,J   |          | CYT | 5.52  | 22185.6 |
| Q72U11 | LIC10853 | Frr   | Ribosome recycling factor                                                 | Translation, ribosomal structure and biogenesis               | COG0233,J   |          | CYT | 9.29  | 20600.7 |
| Q72U06 | LIC10858 | ProS  | Prolyl-tRNA ligase                                                        | Translation, ribosomal structure and biogenesis               | COG0442,J   | 6.1.1.15 | CYT | 5.81  | 64843.3 |
| Q72TF6 | LIC11065 | PcnB  | tRNA nucleotidyltransferase                                               | Translation, ribosomal structure and biogenesis               | COG0617,J   |          | CYT | 10.23 | 57089   |
| Q72T80 | LIC11141 |       | Ribonuclease D-related                                                    | Translation, ribosomal structure and biogenesis               | COG0349,J   |          | CYT | 5.82  | 24748.6 |
| Q72S74 | LIC11511 | Def   | N-formylmethionyl-tRNA deformylase                                        | Translation, ribosomal structure and biogenesis               | COG0242,J   | 3.5.1.31 | CYT | 4.93  | 20379.3 |
| Q72R38 | LIC11913 | LysU  | Lysine--tRNA ligase                                                       | Translation, ribosomal structure and biogenesis               | COG1190,J   | 6.1.1.6  | CYT | 5.46  | 56626.9 |
| Q72PW7 | LIC12350 | GlyRS | Glycine--tRNA ligase                                                      | Translation, ribosomal structure and biogenesis               | COG0423,J   |          | CYT | 5.84  | 53770.8 |
| Q72PR7 | LIC12400 | IleS  | Isoleucine--tRNA ligase                                                   | Translation, ribosomal structure and biogenesis               | COG0060,J   | 6.1.1.5  | CYT | 6.66  | 104366  |
| Q72NX7 | LIC12701 | Pnp   | Polyribonucleotide nucleotidyltransferase                                 | Translation, ribosomal structure and biogenesis               | COG1185,J   | 2.7.7.8  | CYT | 6.08  | 76295.9 |
| Q72NX3 | LIC12705 | InfB  | Translation initiation factor 2 (IF-2; GTPase)                            | Translation, ribosomal structure and biogenesis               | COG0532,J   |          | CYT | 9.51  | 92993.5 |

|        |          |        |                                                      |                                                                |           |          |     |       |         |
|--------|----------|--------|------------------------------------------------------|----------------------------------------------------------------|-----------|----------|-----|-------|---------|
| Q72NF9 | LIC12875 | TufB   | Protein-synthesizing GTPase complex, EF-Tu component | Translation, ribosomal structure and biogenesis                | COG0050,J | 3.6.1.48 | CYT | 5.99  | 43573.9 |
| Q72MR4 | LIC13129 | MetG   | Methionine--tRNA ligase                              | Translation, ribosomal structure and biogenesis                | COG0143,J | 6.1.1.10 | CYT | 6.48  | 81099.1 |
| Q72MG8 | LIC13219 | PheT   | Phenylalanine--tRNA ligase beta subunit              | Translation, ribosomal structure and biogenesis                | COG0072,J | 6.1.1.20 | CYT | 6.38  | 92049.4 |
| Q72M80 | LIC13310 | PheS   | Phenylalanine-tRNA synthetase alpha subunit          | Translation, ribosomal structure and biogenesis                | COG0016,J | 6.1.1.20 | CYT | 6.52  | 38626.2 |
| Q72V72 | LIC10430 | RplY   | 50S Ribosomal protein L25                            | Translation, ribosomal structure and biogenesis; transcription | COG1825,J |          | CYT | 10.16 | 23069.5 |
| P62436 | LIC10749 | RplK   | 50S Ribosomal protein L11                            | Translation, ribosomal structure and biogenesis; transcription | COG0080,J |          | CYT | 10.46 | 15107.7 |
| Q72UB1 | LIC10750 | RplA   | 50S Ribosomal protein L1                             | Translation, ribosomal structure and biogenesis; transcription | COG0081,J |          | CYT | 10.27 | 24966.9 |
| Q72UB0 | LIC10751 | RplJ   | 50S Ribosomal protein L10                            | Translation, ribosomal structure and biogenesis; transcription | COG0244,J |          | CYT | 9.93  | 18851.7 |
| Q72UA9 | LIC10752 | RplL   | 50S Ribosomal protein L7/L12                         | Translation, ribosomal structure and biogenesis; transcription | COG0222,J |          | CYT | 4.98  | 12807.8 |
| Q72UA6 | LIC10755 | RpsL   | 30S Ribosomal protein S12                            | Translation, ribosomal structure and biogenesis; transcription | COG0048,J |          | CYT | 12.28 | 13943.3 |
| Q72UA5 | LIC10756 | RpsG   | 30S Ribosomal protein S7                             | Translation, ribosomal structure and biogenesis; transcription | COG0049,J |          | CYT | 10.66 | 18072.9 |
| Q72UA0 | LIC10761 | RplM   | 50S Ribosomal protein L13                            | Translation, ribosomal structure and biogenesis; transcription | COG0102,J |          | CYT | 10.48 | 16460.2 |
| Q72U99 | LIC10762 | RpsI   | 30S Ribosomal protein S9                             | Translation, ribosomal structure and biogenesis; transcription | COG0103,J |          | CYT | 11.43 | 14904.4 |
| Q72U14 | LIC10850 | RpsB   | 30S Ribosomal protein S2                             | Translation, ribosomal structure and biogenesis; transcription | COG0052,J |          | CYT | 5.92  | 33097.9 |
| P62232 | LIC11555 | RpsP   | 30S Ribosomal protein S16                            | Translation, ribosomal structure and biogenesis; transcription | COG0228,J |          | CYT | 10.79 | 10103.6 |
| Q72S27 | LIC11559 | RplS   | 50S Ribosomal protein L19                            | Translation, ribosomal structure and biogenesis; transcription | COG0335,J |          | CYT | 10.81 | 15522   |
| Q72RP1 | LIC11704 | RpsU   | 30S Ribosomal protein S21                            | Translation, ribosomal structure and biogenesis; transcription | COG0828,J |          | CYT | 10.95 | 7972.47 |
| Q72RI5 | LIC11760 | RpmB   | 50S Ribosomal protein L28                            | Translation, ribosomal structure and biogenesis; transcription | COG0227,J |          | CYT | 12.18 | 10552.4 |
| Q72QK3 | LIC12110 | RplI   | 50S Ribosomal protein L9                             | Translation, ribosomal structure and biogenesis; transcription | COG0359,J |          | CYT | 10.31 | 16607.3 |
| Q72QK2 | LIC12111 | RpsR   | 30S Ribosomal protein S18                            | Translation, ribosomal structure and biogenesis; transcription | COG0238,J |          | CYT | 11.50 | 9603.33 |
| Q72QK0 | LIC12113 | RpsF   | 30S Ribosomal protein S6                             | Translation, ribosomal structure and biogenesis; transcription | COG0360,J |          | CYT | 8.52  | 10711.2 |
| Q72PM2 | LIC12447 | RpsA-2 | 30S Ribosomal protein S1                             | Translation, ribosomal structure and biogenesis; transcription | COG0539,J |          | CYT | 5.96  | 63547.8 |
| Q72NQ6 | LIC12774 | RpmA   | 50S Ribosomal protein L27                            | Translation, ribosomal structure and biogenesis; transcription | COG0211,J |          | CYT | 11.54 | 9102.53 |
| Q72NQ4 | LIC12776 | RplU   | 50S Ribosomal protein L21                            | Translation, ribosomal structure and biogenesis; transcription | COG0261,J |          | CYT | 10.47 | 11878.6 |
| Q72NI9 | LIC12845 | RplQ   | 50S Ribosomal protein L17                            | Translation, ribosomal structure and biogenesis; transcription | COG0203,J |          | CYT | 11.28 | 20088.4 |
| Q72NI7 | LIC12847 | RpsD   | 30S Ribosomal protein S4                             | Translation, ribosomal structure and biogenesis; transcription | COG0522,J |          | CYT | 10.61 | 24043.7 |
| Q72NI6 | LIC12848 | RpsK   | 30S Ribosomal protein S11                            | Translation, ribosomal structure and biogenesis; transcription | COG0100,J |          | CYT | 11.18 | 14702.1 |

|        |          |      |                           |                                                                |           |  |         |       |         |
|--------|----------|------|---------------------------|----------------------------------------------------------------|-----------|--|---------|-------|---------|
| Q72NI5 | LIC12849 | RpsM | 30S Ribosomal protein S13 | Translation, ribosomal structure and biogenesis; transcription | COG0099,J |  | CYT     | 11.40 | 14038.4 |
| Q72NI0 | LIC12854 | RplO | 50S Ribosomal protein L15 | Translation, ribosomal structure and biogenesis; transcription | COG0200,J |  | CYT     | 11.22 | 19865.1 |
| Q72NH9 | LIC12855 | RpmD | 50S Ribosomal protein L30 | Translation, ribosomal structure and biogenesis; transcription | COG1841,J |  | CYT     | 11.82 | 6693.95 |
| Q72NH8 | LIC12856 | RpsE | 30S Ribosomal protein S5  | Translation, ribosomal structure and biogenesis; transcription | COG0098,J |  | CYT     | 10.74 | 18124   |
| Q72NH7 | LIC12857 | RplR | 50S Ribosomal protein L18 | Translation, ribosomal structure and biogenesis; transcription | COG0256,J |  | CYT     | 11.05 | 13522.8 |
| Q72NH6 | LIC12858 | RplF | 50S Ribosomal protein L6  | Translation, ribosomal structure and biogenesis; transcription | COG0097,J |  | CYT     | 10.42 | 19782.1 |
| Q72NH5 | LIC12859 | RpsH | 30S Ribosomal protein S8  | Translation, ribosomal structure and biogenesis; transcription | COG0096,J |  | CYT     | 10.56 | 15118.8 |
| Q72NH3 | LIC12861 | RplE | 50S Ribosomal protein L5  | Translation, ribosomal structure and biogenesis; transcription | COG0094,J |  | CYT     | 10.37 | 20620.2 |
| Q72NH2 | LIC12862 | RplX | 50S Ribosomal protein L24 | Translation, ribosomal structure and biogenesis; transcription | COG0198,J |  | CYT     | 11.16 | 13800.3 |
| Q72NH0 | LIC12864 | RpsQ | 30S Ribosomal protein S17 | Translation, ribosomal structure and biogenesis; transcription | COG0186,J |  | CYT     | 11.09 | 10377.3 |
| Q72NG9 | LIC12865 | RpmC | 50S Ribosomal protein L29 | Translation, ribosomal structure and biogenesis; transcription | COG0255,J |  | CYT     | 11.78 | 10958   |
| Q72NG8 | LIC12866 | RplP | 50S Ribosomal protein L16 | Translation, ribosomal structure and biogenesis; transcription | COG0197,J |  | CYT     | 11.89 | 15505.2 |
| Q72NG7 | LIC12867 | RpsC | 30S Ribosomal protein S3  | Translation, ribosomal structure and biogenesis; transcription | COG0092,J |  | CYT     | 10.79 | 25671.8 |
| Q72NG6 | LIC12868 | RplV | 50S Ribosomal protein L22 | Translation, ribosomal structure and biogenesis; transcription | COG0091,J |  | CYT     | 11.74 | 12565.8 |
| Q72NG5 | LIC12869 | RpsS | 30S Ribosomal protein S19 | Translation, ribosomal structure and biogenesis; transcription | COG0185,J |  | CYT     | 11.18 | 10668.4 |
| Q72NG4 | LIC12870 | RplB | 50S Ribosomal protein L2  | Translation, ribosomal structure and biogenesis; transcription | COG0090,J |  | CYT     | 10.96 | 30650.2 |
| Q72NG3 | LIC12871 | RplW | 50S Ribosomal protein L23 | Translation, ribosomal structure and biogenesis; transcription | COG0089,J |  | CYT     | 10.98 | 11803.8 |
| Q72NG2 | LIC12872 | RplD | 50S Ribosomal protein L4  | Translation, ribosomal structure and biogenesis; transcription | COG0088,J |  | CYT     | 10.73 | 23325.9 |
| Q72NG1 | LIC12873 | RplC | 50S Ribosomal protein L3  | Translation, ribosomal structure and biogenesis; transcription | COG0087,J |  | CYT     | 10.77 | 21838.1 |
| Q72NG0 | LIC12874 | RpsJ | 30S Ribosomal protein S10 | Translation, ribosomal structure and biogenesis; transcription | COG0051,J |  | CYT     | 10.43 | 11467.3 |
| Q72W61 | LIC10076 |      | Uncharacterized protein   | Unknown                                                        |           |  | CYT     | 5.22  | 11004   |
| Q72W45 | LIC10095 |      | Uncharacterized protein   | Unknown                                                        |           |  | NON-CYT | 9.94  | 9086.34 |
| Q72VY4 | LIC10161 |      | Uncharacterized protein   | Unknown                                                        |           |  | CYT     | 7.87  | 81029.9 |
| Q72VU0 | LIC10206 |      | Uncharacterized protein   | Unknown                                                        |           |  | CYT     | 11.15 | 7812.22 |
| Q72VS7 | LIC10219 |      | Uncharacterized protein   | Unknown                                                        |           |  | CYT     | 7.19  | 30943.8 |
| Q72VR5 | LIC10231 |      | Uncharacterized protein   | Unknown                                                        |           |  | NON-CYT | 5.04  | 37703   |
| Q72VR1 | LIC10235 |      | Uncharacterized protein   | Unknown                                                        |           |  | CYT     | 10.63 | 10784.6 |
| Q72VQ2 | LIC10244 |      | Uncharacterized protein   | Unknown                                                        |           |  | CYT     | 4.89  | 29409.7 |
| Q72VD6 | LIC10362 |      | Uncharacterized protein   | Unknown                                                        |           |  | IM      | 9.44  | 15655.4 |
| Q72V17 | LIC10486 |      | Uncharacterized protein   | Unknown                                                        |           |  | CYT     | 6.16  | 38999.7 |
| Q72UZ1 | LIC10512 |      | Uncharacterized protein   | Unknown                                                        |           |  | NON-CYT | 8.92  | 31872.7 |
| Q72UI5 | LIC10672 |      | Uncharacterized protein   | Unknown                                                        |           |  | NON-CYT | 9.19  | 26922.2 |
| Q72U96 | LIC10765 |      | Uncharacterized protein   | Unknown                                                        |           |  | NON-CYT | 9.66  | 14506.2 |
| Q72U89 | LIC10772 |      | Uncharacterized protein   | Unknown                                                        |           |  | NON-CYT | 9.18  | 30150.6 |



|        |              |  |                                   |         |           |  |         |       |         |
|--------|--------------|--|-----------------------------------|---------|-----------|--|---------|-------|---------|
| Q72TK9 | LIC11009     |  | Uncharacterized protein           | Unknown |           |  | NON-CYT | 5.47  | 28365.4 |
| Q72T39 | LIC11182     |  | Uncharacterized protein           | Unknown |           |  | CYT     | 11.11 | 19079.6 |
| Q72SV4 | LIC11268     |  | Uncharacterized protein           | Unknown |           |  | OM      | 8.82  | 68851.1 |
| Q72SU9 | LIC11274     |  | Uncharacterized protein           | Unknown |           |  | NON-CYT | 9.52  | 43248.1 |
| Q72S95 | LIC11489     |  | Uncharacterized protein           | Unknown |           |  | NON-CYT | 5.34  | 46423.5 |
| Q72S85 | LIC11499     |  | Uncharacterized protein           | Unknown |           |  | CYT     | 10.81 | 9059.46 |
| Q72RW3 | LIC11625     |  | Uncharacterized protein           | Unknown |           |  | NON-CYT | 8.80  | 17103.6 |
| Q72RU0 | LIC11650     |  | Uncharacterized protein           | Unknown |           |  | CYT     | 9.73  | 41067.6 |
| Q72RQ1 | LIC11693     |  | Uncharacterized protein           | Unknown |           |  | NON-CYT | 6.55  | 18697.7 |
| Q72RG1 | LIC11784     |  | Uncharacterized protein           | Unknown |           |  | NON-CYT | 8.63  | 24207   |
| Q72RC0 | LIC11826     |  | Uncharacterized protein           | Unknown |           |  | CYT     | 10.02 | 30612   |
| Q72RA0 | LIC11848     |  | Uncharacterized protein           | Unknown |           |  | NON-CYT | 8.57  | 32021.2 |
| Q72QN8 | LIC12075     |  | Uncharacterized protein           | Unknown |           |  | NON-CYT | 9.19  | 32961.4 |
| Q72QM9 | LIC12084     |  | Uncharacterized protein           | Unknown |           |  | CYT     | 8.42  | 40145.4 |
| Q72Q50 | LIC12263     |  | Uncharacterized protein           | Unknown |           |  | NON-CYT | 6.69  | 37517.9 |
| Q72PW8 | LIC12349     |  | Uncharacterized protein           | Unknown |           |  | IM      | 9.91  | 64753.7 |
| Q72PS0 | LIC12397     |  | Uncharacterized protein           | Unknown |           |  | CYT     | 6.57  | 68916.2 |
| Q72PM3 | LIC12446     |  | Uncharacterized protein           | Unknown |           |  | CYT     | 9.73  | 27904   |
| Q72PL1 | LIC12460     |  | Uncharacterized protein           | Unknown |           |  | CYT     | 3.66  | 23671.6 |
| Q72NY3 | LIC12695     |  | Uncharacterized protein           | Unknown |           |  | CYT     | 5.77  | 50175.3 |
| Q72NM7 | LIC12805     |  | Uncharacterized protein           | Unknown |           |  | IM      | 7.69  | 38344.7 |
| Q72NL2 | LIC12822     |  | Uncharacterized protein           | Unknown |           |  | CYT     | 6.39  | 30209.3 |
| Q72NA0 | LIC12936     |  | Uncharacterized protein           | Unknown |           |  | NON-CYT | 9.51  | 26876.8 |
| Q72N79 | LIC12958     |  | Uncharacterized protein           | Unknown |           |  | CYT     | 9.37  | 11214.2 |
| Q72MR5 | LIC13128     |  | Uncharacterized protein           | Unknown |           |  | CYT     | 4.74  | 19312.2 |
| Q72MM7 | LIC13166     |  | Uncharacterized protein           | Unknown |           |  | NON-CYT | 8.80  | 36212.2 |
| Q72MC0 | LIC13268     |  | Uncharacterized protein           | Unknown |           |  | IM      | 7.78  | 17199.9 |
| Q72M77 | LIC13313     |  | Uncharacterized protein           | Unknown |           |  | NON-CYT | 9.23  | 42378.3 |
| Q72M28 | LIC13363     |  | Uncharacterized protein           | Unknown |           |  | NON-CYT | 9.54  | 29526.9 |
| Q72LS9 | LIC13471     |  | Uncharacterized protein           | Unknown |           |  | CYT     | 4.87  | 8139.24 |
| Q75FR8 | LIC20113     |  | Uncharacterized protein           | Unknown |           |  | CYT     | 9.77  | 21575.2 |
| Q75FR4 | LIC20118     |  | Uncharacterized protein           | Unknown |           |  | CYT     | 9.88  | 12763.1 |
| Q75FL7 | LIC20165     |  | Uncharacterized protein           | Unknown |           |  | CYT     | 9.03  | 44785.8 |
| Q75FI8 | LIC20196     |  | Uncharacterized protein           | Unknown |           |  | NON-CYT | 9.36  | 17174   |
| Q75FI6 | LIC20198     |  | Uncharacterized protein           | Unknown | COG2200,T |  | CYT     | 4.99  | 52014.6 |
| Q75FC2 | LIC20272     |  | Uncharacterized protein           | Unknown |           |  | CYT     | 8.63  | 38802.8 |
| NA     | LIC2_SPN3857 |  | Uncharacterized protein           | Unknown |           |  | CYT     | 4.49  | 10326.7 |
| Q72WC8 | LIC10009     |  | Uncharacterized lipoprotein       | Unknown |           |  | NON-CYT | 6.73  | 27700.8 |
| Q72W17 | LIC10124     |  | Uncharacterized lipoprotein       | Unknown |           |  | NON-CYT | 6.11  | 60434.7 |
| Q72UU9 | LIC10558     |  | Uncharacterized lipoprotein       | Unknown |           |  | NON-CYT | 10.10 | 17300.2 |
| Q72TY5 | LIC10879     |  | Uncharacterized lipoprotein       | Unknown |           |  | NON-CYT | 8.45  | 17955.6 |
| NA     | LIC13520     |  | Uncharacterized lipoprotein       | Unknown |           |  | NON-CYT | 9.26  | 58226.4 |
| Q75FL0 | LIC20172     |  | Uncharacterized lipoprotein       | Unknown | COG5422,T |  | NON-CYT | 5.08  | 71720.9 |
| NA     | LIC2_SPN3853 |  | Uncharacterized lipoprotein       | Unknown |           |  | NON-CYT | 8.50  | 9766.71 |
| Q72VT5 | LIC10211     |  | Uncharacterized lipoprotein       | Unknown |           |  | NON-CYT | 8.76  | 10845.9 |
| Q72VJ6 | LIC10301     |  | Uncharacterized lipoprotein       | Unknown |           |  | NON-CYT | 8.06  | 13445.6 |
| Q72UZ6 | LIC10507     |  | Uncharacterized lipoprotein       | Unknown |           |  | NON-CYT | 5.48  | 24021.4 |
| Q72TN2 | LIC10985     |  | Uncharacterized lipoprotein       | Unknown |           |  | NON-CYT | 9.36  | 40107.2 |
| Q72QY9 | LIC11966     |  | Uncharacterized lipoprotein       | Unknown |           |  | NON-CYT | 5.98  | 17836.2 |
| Q72Q81 | LIC12231     |  | Uncharacterized lipoprotein       | Unknown |           |  | NON-CYT | 9.15  | 21453.6 |
| Q72ND9 | LIC12895     |  | Uncharacterized lipoprotein       | Unknown |           |  | NON-CYT | 6.94  | 25565.1 |
| Q72MW3 | LIC13076     |  | Uncharacterized lipoprotein       | Unknown |           |  | NON-CYT | 9.83  | 28159.1 |
| Q72LY3 | LIC13410     |  | Uncharacterized lipoprotein       | Unknown |           |  | NON-CYT | 8.66  | 14227.5 |
| Q72WB0 | LIC10027     |  | Conserved uncharacterized protein | Unknown | COG3748,S |  | IM      | 9.59  | 25746.5 |

|        |          |  |                                   |         |           |  |         |       |         |
|--------|----------|--|-----------------------------------|---------|-----------|--|---------|-------|---------|
| Q72W73 | LIC10064 |  | Conserved uncharacterized protein | Unknown | COG4731,S |  | NON-CYT | 9.59  | 17389   |
| Q72W37 | LIC10103 |  | Conserved uncharacterized protein | Unknown |           |  | CYT     | 10.15 | 22854.4 |
| Q72W24 | LIC10117 |  | Conserved uncharacterized protein | Unknown | COG4805,S |  | NON-CYT | 9.20  | 70380.6 |
| Q72VX0 | LIC10175 |  | Conserved uncharacterized protein | Unknown |           |  | CYT     | 5.73  | 54179   |
| Q72VT1 | LIC10215 |  | Conserved uncharacterized protein | Unknown | COG4956,R |  | IM      | 7.17  | 36920.7 |
| Q72VI3 | LIC10314 |  | Conserved uncharacterized protein | Unknown |           |  | NON-CYT | 8.90  | 63679.6 |
| Q72VH9 | LIC10318 |  | Conserved uncharacterized protein | Unknown |           |  | OM      | 9.24  | 72817.3 |
| Q72VC1 | LIC10380 |  | Conserved uncharacterized protein | Unknown | COG3449,L |  | NON-CYT | 8.75  | 20941.7 |
| Q72V90 | LIC10411 |  | Conserved uncharacterized protein | Unknown |           |  | NON-CYT | 7.52  | 17243.7 |
| Q72V20 | LIC10483 |  | Conserved uncharacterized protein | Unknown | COG4260,S |  | CYT     | 5.43  | 36148.3 |
| Q72UV6 | LIC10551 |  | Conserved uncharacterized protein | Unknown |           |  | NON-CYT | 9.15  | 41570.9 |
| Q72US9 | LIC10578 |  | Conserved uncharacterized protein | Unknown | COG1413,C |  | NON-CYT | 9.50  | 55260.7 |
| Q72UQ6 | LIC10601 |  | Conserved uncharacterized protein | Unknown |           |  | CYT     | 6.53  | 17096.6 |
| Q72UL4 | LIC10643 |  | Conserved uncharacterized protein | Unknown |           |  | CYT     | 8.17  | 50082.8 |
| Q72UJ5 | LIC10662 |  | Conserved uncharacterized protein | Unknown |           |  | NON-CYT | 7.66  | 20352.4 |
| Q72UA1 | LIC10760 |  | Conserved uncharacterized protein | Unknown | COG2353,S |  | NON-CYT | 9.83  | 23034.5 |
| Q72U97 | LIC10764 |  | Conserved uncharacterized protein | Unknown |           |  | CYT     | 9.48  | 18364.2 |
| Q72TZ1 | LIC10873 |  | Conserved uncharacterized protein | Unknown |           |  | NON-CYT | 8.28  | 18650.2 |
| Q72TY8 | LIC10876 |  | Conserved uncharacterized protein | Unknown |           |  | CYT     | 8.20  | 20699.9 |
| Q72TY7 | LIC10877 |  | Conserved uncharacterized protein | Unknown |           |  | CYT     | 9.21  | 17732   |
| Q72TY6 | LIC10878 |  | Conserved uncharacterized protein | Unknown | COG5557,C |  | IM      | 8.89  | 46373.1 |
| Q72TU8 | LIC10918 |  | Conserved uncharacterized protein | Unknown | COG3832,S |  | CYT     | 6.51  | 19141.9 |
| Q72TN3 | LIC10984 |  | Conserved uncharacterized protein | Unknown | COG1262,S |  | NON-CYT | 8.65  | 33245.1 |
| Q72TG2 | LIC11059 |  | Conserved uncharacterized protein | Unknown |           |  | CYT     | 4.87  | 10044.2 |
| Q72T25 | LIC11196 |  | Conserved uncharacterized protein | Unknown |           |  | CYT     | 6.53  | 17317   |
| Q72T13 | LIC11209 |  | Conserved uncharacterized protein | Unknown |           |  | CYT     | 5.78  | 15055.2 |
| Q72SZ8 | LIC11224 |  | Conserved uncharacterized protein | Unknown |           |  | NON-CYT | 7.09  | 39951.6 |
| Q72SV0 | LIC11273 |  | Conserved uncharacterized protein | Unknown | COG1655,S |  | CYT     | 8.51  | 33166.9 |
| Q72SP3 | LIC11334 |  | Conserved uncharacterized protein | Unknown | COG2968,S |  | NON-CYT | 9.14  | 25116.9 |
| Q72SJ3 | LIC11389 |  | Conserved uncharacterized protein | Unknown |           |  | NON-CYT | 4.56  | 24385.1 |
| Q72SH7 | LIC11405 |  | Conserved uncharacterized protein | Unknown |           |  | CYT     | 8.73  | 76763.4 |
| Q72S33 | LIC11553 |  | Conserved uncharacterized protein | Unknown | COG2815,S |  | NON-CYT | 8.57  | 37007.4 |
| Q72RV3 | LIC11635 |  | Conserved uncharacterized protein | Unknown | COG2013,S |  | CYT     | 5.71  | 23638.1 |
| Q72R87 | LIC11861 |  | Conserved uncharacterized protein | Unknown | COG4929,S |  | NON-CYT | 8.34  | 20958.3 |
| Q72QZ7 | LIC11955 |  | Conserved uncharacterized protein | Unknown |           |  | CYT     | 3.64  | 19067.1 |
| Q72QZ4 | LIC11958 |  | Conserved uncharacterized protein | Unknown | COG1413,C |  | NON-CYT | 8.60  | 45451.3 |
| Q72QY5 | LIC11972 |  | Conserved uncharacterized protein | Unknown |           |  | CYT     | 7.54  | 15094.2 |
| Q72QV7 | LIC12001 |  | Conserved uncharacterized protein | Unknown |           |  | IM      | 10.31 | 24960.6 |
| Q72QS2 | LIC12040 |  | Conserved uncharacterized protein | Unknown | COG2764,S |  | CYT     | 5.01  | 16484.8 |
| Q72QC4 | LIC12188 |  | Conserved uncharacterized protein | Unknown | COG2227,H |  | CYT     | 6.74  | 46218.9 |
| Q72QB9 | LIC12193 |  | Conserved uncharacterized protein | Unknown |           |  | CYT     | 5.43  | 30591.7 |
| Q72Q65 | LIC12247 |  | Conserved uncharacterized protein | Unknown |           |  | CYT     | 8.91  | 18941.6 |
| Q72Q37 | LIC12277 |  | Conserved uncharacterized protein | Unknown |           |  | NON-CYT | 10.44 | 28580.6 |
| Q72PZ0 | LIC12325 |  | Conserved uncharacterized protein | Unknown |           |  | CYT     | 8.38  | 21029.9 |
| Q72PY9 | LIC12326 |  | Conserved uncharacterized protein | Unknown |           |  | CYT     | 4.18  | 14273   |
| Q72PU6 | LIC12371 |  | Conserved uncharacterized protein | Unknown |           |  | CYT     | 4.51  | 17807.1 |
| Q72PD2 | LIC12539 |  | Conserved uncharacterized protein | Unknown |           |  | NON-CYT | 10.64 | 27451.1 |
| Q72PA6 | LIC12568 |  | Conserved uncharacterized protein | Unknown |           |  | CYT     | 5.91  | 31874.6 |
| Q72P55 | LIC12621 |  | Conserved uncharacterized protein | Unknown | COG1664,M |  | CYT     | 5.98  | 14522.4 |
| Q72MY9 | LIC13050 |  | Conserved uncharacterized protein | Unknown |           |  | NON-CYT | 5.02  | 39232.9 |
| Q72MR9 | LIC13123 |  | Conserved uncharacterized protein | Unknown |           |  | NON-CYT | 6.81  | 33139.2 |
| Q72ML0 | LIC13183 |  | Conserved uncharacterized protein | Unknown |           |  | CYT     | 6.96  | 13819.8 |
| Q72MJ7 | LIC13196 |  | Conserved uncharacterized protein | Unknown |           |  | CYT     | 9.98  | 28248.6 |
| Q72MH3 | LIC13214 |  | Conserved uncharacterized protein | Unknown |           |  | IM      | 9.61  | 21664.5 |

|        |              |        |                                                                                       |         |             |          |         |       |         |
|--------|--------------|--------|---------------------------------------------------------------------------------------|---------|-------------|----------|---------|-------|---------|
| Q72M76 | LIC13314     |        | Conserved uncharacterized protein                                                     | Unknown |             |          | IM      | 9.19  | 75562.9 |
| Q72M59 | LIC13332     |        | Conserved uncharacterized protein                                                     | Unknown |             |          | CYT     | 4.20  | 8667.69 |
| Q75G12 | LIC20001     |        | Conserved uncharacterized protein                                                     | Unknown |             |          | OM      | 6.42  | 90967.8 |
| Q75FZ9 | LIC20016     |        | Conserved uncharacterized protein                                                     | Unknown |             |          | IM      | 9.63  | 36104.2 |
| Q75FT5 | LIC20096     |        | Conserved uncharacterized protein                                                     | Unknown |             |          | CYT     | 9.25  | 40457.1 |
| Q75FJ1 | LIC20191     |        | Conserved uncharacterized protein                                                     | Unknown |             |          | CYT     | 9.49  | 76377.9 |
| Q75FI4 | LIC20205     |        | Conserved uncharacterized protein                                                     | Unknown | COG1633,S   |          | CYT     | 10.38 | 32144.8 |
| Q72UM9 | LIC10628     |        | Conserved uncharacterized lipoprotein                                                 | Unknown |             |          | NON-CYT | 8.48  | 14817.9 |
| Q72R63 | LIC11885     |        | conserved uncharacterized lipoprotein                                                 | Unknown |             |          | OM      | 6.90  | 44713.7 |
| Q75G29 | LIC20035     |        | Conserved uncharacterized lipoprotein                                                 | Unknown | COG2849,S   |          | NON-CYT | 8.97  | 49905.8 |
| Q72RC4 | LIC11822     | LeuC   | 3-isopropylmalate dehydratase, large subunit                                          | NA      | COG0065,E   | 4.2.1.33 | CYT     | 6.99  | 50641.7 |
| Q72RC5 | LIC11821     | LeuD   | 3-isopropylmalate dehydratase, small subunit                                          | NA      | COG0066,E   | 4.2.1.33 | CYT     | 5.71  | 23596.9 |
| Q72RH7 | LIC11768     | LeuB-1 | 3-isopropylmalate dehydrogenase                                                       | NA      | COG0473,C,E | 1.1.1.85 | CYT     | 5.84  | 38870.6 |
| Q72PZ2 | LIC12323     | FabH   | 3-oxoacyl-[acyl-carrier protein] synthase                                             | NA      | COG0332,I   | 2.3.1.41 | CYT     | 6.69  | 35134   |
| Q72RG5 | LIC11780     | BioF   | 8-amino-7-oxononanoate synthase                                                       | NA      | COG0156,H   | 2.3.1.47 | CYT     | 8.29  | 41743.8 |
| Q72R12 | LIC11940     |        | AcrA-related membrane protein                                                         | NA      | COG0845,M   |          | IM      | 8.78  | 36552.8 |
| Q72NU0 | LIC12739     |        | Acyl dehydratase                                                                      | NA      | COG2030,I   |          | CYT     | 8.75  | 17088.8 |
| Q72UQ7 | LIC10600     |        | Acyl dehydratase, MaoC family                                                         | NA      | COG2030,I   |          | CYT     | 7.44  | 15149.3 |
| Q72TC6 | LIC11095     |        | Adenylate/guanylate cyclase, part (C-term)                                            | NA      | COG2114,T   |          | IM      | 7.08  | 40727.3 |
| Q72PA7 | LIC12565     |        | Adenylosuccinate synthase                                                             | NA      | COG0104,F   | 6.3.4.4  | CYT     | 7.54  | 47056.9 |
| P61703 | LIC10763     | AlaS   | Alanine--tRNA ligase                                                                  | NA      | COG0013,J   | 6.1.1.7  | CYT     | 6.01  | 108515  |
| Q72QE6 | LIC12166     |        | Alcohol dehydrogenase                                                                 | NA      | COG1454,C   |          | CYT     | 6.99  | 39768.8 |
| Q72Q79 | LIC12233     |        | Aldolase                                                                              | NA      | COG1830,G   |          | CYT     | 7.25  | 37977.1 |
| Q72T81 | LIC11140     |        | Alpha-galactosidase                                                                   | NA      | COG3345,G   |          | CYT     | 9.28  | 73882.1 |
| Q72PS5 | LIC12392     |        | Amidase                                                                               | NA      | COG0154,J   |          | CYT     | 9.66  | 54410.6 |
| Q72QE4 | LIC12168     |        | Aminotransferase                                                                      | NA      | COG0399,M   |          | CYT     | 6.85  | 44359.8 |
| Q72V61 | LIC10441     | AmtB   | Ammonia permease                                                                      | NA      | COG0004,P   |          | IM      | 7.23  | 45133.3 |
| Q72ML7 | LIC13176     |        | Aryl-alcohol dehydrogenase-related oxidoreductase                                     | NA      | COG0667,C   |          | CYT     | 8.54  | 39715.3 |
| Q72NC5 | LIC12909     | LysC   | Aspartate kinase                                                                      | NA      | COG0527,E   | 2.7.2.4  | CYT     | 6.44  | 43059.3 |
| Q75FC8 | LIC20266     | Asd    | Aspartate-semialdehyde dehydrogenase                                                  | NA      | COG0136,E   | 1.2.1.11 | CYT     | 8.47  | 38031.9 |
| Q72VE7 | LIC10351     |        | ATP-binding protein of an ABC transporter complex                                     | NA      | COG1131,V   |          | CYT     | 9.60  | 33388.7 |
| Q72UW9 | LIC10538     |        | ATP-binding protein of an ABC transporter complex                                     | NA      | COG0488,R   |          | IM      | 4.99  | 60875.1 |
| Q72Q04 | LIC12311     |        | ATP-binding protein of an ABC transporter complex                                     | NA      | COG1136,V   |          | CYT     | 4.83  | 24654.2 |
| Q72PE5 | LIC12526     |        | ATP-binding protein of an ABC transporter complex                                     | NA      | COG1118,P   |          | CYT     | 6.76  | 40301.9 |
| Q72M74 | LIC13316     |        | ATP-binding protein of an ABC transporter complex                                     | NA      | COG1131,V   |          | CYT     | 7.50  | 34872.1 |
| Q72VF8 | LIC10339     | ClpA-3 | ATP-dependent Clp protease                                                            | NA      | COG0542,O   |          | CYT     | 6.61  | 95304.8 |
| Q75FT8 | LIC20093     |        | Bacterioferritin comigratory protein                                                  | NA      | COG1225,O   |          | CYT     | 5.80  | 17733.1 |
| Q72SG9 | LIC11413     |        | Beta-glucosidase-related glycosidase                                                  | NA      | COG1472,G   |          | NON-CYT | 8.50  | 64962   |
| Q72PD7 | LIC12534     | RibAB  | Bifunctional 3,4-dihydroxy-2-butanone 4-phosphate                                     | NA      | COG0108,H   | 3.5.4.25 | CYT     | 5.86  | 44361.1 |
| Q72PJ5 | LIC12476     | AceF   | Bifunctional dihydrolipoyllysine-residue                                              | NA      | COG0508,C   | 2.3.1.12 | CYT     | 7.19  | 45197.9 |
| NA     | LIC1_SPN3184 |        | Bifunctional dihydrolipoyllysine-residue                                              | NA      | COG0508,C   | 2.3.1.12 | CYT     | 7.69  | 49036.7 |
| Q72PA9 | LIC12563     |        | Bifunctional glycerol-3-phosphate dehydrogenase /glycerol-3-phosphate acyltransferase | NA      | COG0240,C   |          | CYT     | 8.37  | 75133.9 |
| Q72N17 | LIC13021     |        | cAMP-dependent protein kinase                                                         | NA      | COG0664,T   |          | CYT     | 7.14  | 95355.2 |
| P61442 | LIC10524     | DnaK   | Chaperone protein, Hsp70                                                              | NA      | COG0443,O   |          | CYT     | 4.85  | 69098.7 |
| NA     | LIC13522     | CheA   | Chemotaxis protein histidine kinase                                                   | NA      | COG0643,N,T |          | CYT     | 4.75  | 119746  |
| Q72PL4 | LIC12457     | CheW   | Chemotaxis signal transduction protein                                                | NA      | COG0835,N,T |          | CYT     | 4.25  | 18595.3 |
| Q72T27 | LIC11194     | CitE   | Citrate lyase, beta subunit                                                           | NA      | COG2301,G   | 4.1.3.6  | CYT     | 6.51  | 37061.4 |
| Q72PX6 | LIC12341     |        | Component of an ABC transporter system                                                | NA      | COG2854,Q   |          | NON-CYT | 9.83  | 22899.3 |
| Q72V96 | LIC10405     |        | Conserved uncharacterized protein containing tetratricopeptide repeat (TPR) domains   | NA      | COG1729,S   |          | NON-CYT | 6.20  | 78007.8 |
| Q72VH2 | LIC10325     |        | Conserved uncharacterized protein with tetratricopeptide repeat domain                | NA      | COG1729,S   |          | NON-CYT | 5.98  | 43370.6 |
| Q72Q11 | LIC12303     | Prc-2  | C-terminal processing periplasmic-protease-3                                          | NA      | COG0793,M   |          | PER     | 8.93  | 51529.4 |

|        |          |        |                                                                             |    |             |                             |         |       |         |
|--------|----------|--------|-----------------------------------------------------------------------------|----|-------------|-----------------------------|---------|-------|---------|
| Q72U71 | LIC10791 |        | Cyclic nucleotide binding protein                                           | NA | COG0664,T   |                             | CYT     | 9.32  | 23779.8 |
| Q72RC6 | LIC11820 | CysK-3 | Cysteine synthase                                                           | NA | COG0031,E   | 2.5.1.47                    | CYT     | 9.19  | 37012.2 |
| Q72VT8 | LIC10208 | CyoA   | Cytochrome C oxidase subunit II                                             | NA | COG1622,C   | 1.10.3.-                    | IM      | 7.97  | 37679.3 |
| Q72SC8 | LIC11456 | LipL31 | Cytoplasmic membrane lipoprotein, LipL31                                    | NA |             |                             | IM      | 7.35  | 27620.7 |
| Q72RY6 | LIC11602 |        | Dehydrogenase                                                               | NA | COG2133,G   |                             | CYT     | 8.98  | 57645.7 |
| Q72QW6 | LIC11992 |        | Dehydrogenase                                                               | NA | COG0111,H,E |                             | CYT     | 7.12  | 44788.5 |
| Q72W68 | LIC10069 |        | Dioxygenase superfamily protein                                             | NA | COG0346,E   |                             | CYT     | 3.89  | 13657.3 |
| Q72RF4 | LIC11791 |        | DNA or RNA helicase of superfamily II                                       | NA | COG1061,K,L |                             | CYT     | 6.75  | 64575.7 |
| Q72M44 | LIC13347 |        | DNA topoisomerase (ATP-hydrolyzing), subunit A                              | NA | COG0188,L   | 5.99.1.3                    | CYT     | 8.69  | 54076.9 |
| Q72UQ1 | LIC10606 | Dps    | DNA-binding ferritin-like protein                                           | NA | COG0783,P   |                             | CYT     | 6.01  | 18228.6 |
| Q72WD5 | LIC10002 | DnaN   | DNA-directed DNA polymerase, beta subunit                                   | NA | COG0592,L   | 2.7.7.7                     | CYT     | 4.76  | 41443.1 |
| Q72UA8 | LIC10753 | RpoB   | DNA-directed RNA polymerase, beta subunit                                   | NA | COG0085,K   | 2.7.7.6                     | CYT     | 5.56  | 137767  |
| Q72UA7 | LIC10754 | RpoC   | DNA-directed RNA polymerase, beta subunit                                   | NA | COG0086,K   | 2.7.7.6                     | CYT     | 6.96  | 157624  |
| Q72S75 | LIC11510 |        | Efflux pump, AcrB family                                                    | NA | COG0841,V   |                             | IM      | 6.94  | 120334  |
| Q72VD7 | LIC10361 | EftB   | Electron transfer flavoprotein, beta subunit                                | NA | COG2086,C   |                             | CYT     | 5.46  | 27068   |
| Q72UN3 | LIC10624 | FliL   | Endoflagellar basal body-associated protein                                 | NA | COG1580,N   |                             | PER     | 4.51  | 19206.1 |
| Q72S18 | LIC11394 | FliH   | Endoflagellar biosynthesis/type III secretory pathway protein               | NA | COG1317,N,U |                             | CYT     | 4.72  | 35818.8 |
| Q72NV4 | LIC12725 |        | Enoyl-CoA hydratase/carnithine racemase                                     | NA | COG1024,I   |                             | CYT     | 8.45  | 29764.2 |
| Q72RZ8 | LIC11590 | XseB   | Exodeoxyribonuclease VII, small subunit                                     | NA | COG1722,L   | 3.1.11.6                    | CYT     | 4.50  | 10854.2 |
| Q72ST1 | LIC11294 |        | Fe-S oxidoreductase                                                         | NA | COG0247,C   |                             | IM      | 6.51  | 77136.3 |
| Q72TY9 | LIC10875 |        | Fe-S-cluster-containing hydrogenase, membrane component                     | NA | COG5557,C   |                             | IM      | 7.76  | 52036.3 |
| Q72T74 | LIC11147 |        | Flavin reductase related protein                                            | NA | COG1853,R   |                             | CYT     | 6.22  | 17397.7 |
| Q72TQ8 | LIC10959 |        | Flavoprotein                                                                | NA | COG2072,P   |                             | NON-CYT | 9.71  | 53881.9 |
| Q75G27 | LIC20022 |        | Flavoprotein                                                                | NA | COG0431,R   |                             | CYT     | 8.65  | 22305.5 |
| Q72NY4 | LIC12694 | GlitB  | Glutamate synthase (NADH)                                                   | NA | COG0069,E   | 1.4.1.13                    | CYT     | 6.58  | 166269  |
| Q72RE6 | LIC11799 | GlpK-1 | Glycerol kinase                                                             | NA | COG0554,C   | 2.7.1.30                    | CYT     | 9.56  | 55085.9 |
| Q72VI8 | LIC10309 | GcvP   | Glycine dehydrogenase (decarboxylating), protein P                          | NA | COG1003,E   | 1.4.4.2                     | CYT     | 6.54  | 106324  |
| Q72V51 | LIC10452 |        | Glycosyltransferase                                                         | NA | COG0463,M   |                             | CYT     | 9.03  | 26480.7 |
| Q72UN7 | LIC10620 |        | Glycosyltransferase                                                         | NA | COG0438,M   |                             | CYT     | 9.85  | 42432.9 |
| Q72TJ7 | LIC11024 |        | Glycosyltransferase                                                         | NA | COG0463,M   |                             | CYT     | 9.69  | 37951   |
| Q72QD3 | LIC12179 |        | Glycosyltransferase                                                         | NA | COG0463,M   |                             | CYT     | 9.66  | 35580.4 |
| Q72U26 | LIC10838 |        | Glyoxalase                                                                  | NA | COG3324,R   |                             | CYT     | 4.41  | 16221   |
| Q72WA0 | LIC10037 |        | GMC-family oxidoreductase                                                   | NA | COG2303,E   |                             | CYT     | 8.64  | 58470.7 |
| Q72U73 | LIC10789 | GreA   | greA transcription elongation factor related protein                        | NA | COG1747,S   |                             | CYT     | 5.62  | 106948  |
| Q72RB6 | LIC11832 |        | GTP cyclohydrolase-1 related protein                                        | NA | COG0780,R   |                             | CYT     | 7.50  | 15352.6 |
| Q72RA4 | LIC11844 |        | HflC membrane associated protease                                           | NA | COG0330,O   |                             | IM      | 5.07  | 35195.6 |
| Q72RA3 | LIC11845 |        | HflC membrane associated protease                                           | NA | COG0330,O   |                             | IM      | 8.88  | 35083.3 |
| P62359 | LIC12564 |        | Histidine biosynthesis protein                                              | NA | COG0124,J   |                             | CYT     | 6.17  | 39113.5 |
| P62458 | LIC11453 | HisD   | Histidinol dehydrogenase                                                    | NA | COG0141,E   | 1.1.1.23                    | CYT     | 9.67  | 46380.6 |
| Q72NN1 | LIC12801 |        | Hydrolase or acyltransferase                                                | NA | COG0596,R   |                             | CYT     | 10.43 | 34339.8 |
| Q72UW1 | LIC10546 |        | Hydrolase or acyltransferase, alpha/beta hydrolase superfamily, lipoprotein | NA | COG3243,I   |                             | NON-CYT | 8.57  | 40267   |
| Q72U64 | LIC10800 |        | Hydroxyethylthiazole kinase family                                          | NA | COG2145,H   |                             | CYT     | 5.86  | 27371.6 |
| P61660 | LIC10112 | HisB   | Imidazoleglycerol-phosphate dehydratase or histidinol-phosphatase           | NA | COG0131,E   | 3.1.3.15<br>~~~<br>4.2.1.19 | CYT     | 6.65  | 23167.6 |
| Q72M63 | LIC13328 | LeuB-2 | Isocitrate dehydrogenase (NADP+)                                            | NA | COG0473,C,E | 1.1.1.42                    | CYT     | 7.16  | 53888   |
| Q72PR6 | LIC12401 |        | Leucine-rich-repeat protein                                                 | NA | COG4886,S   |                             | NON-CYT | 8.79  | 24581.7 |
| Q72MX9 | LIC13060 | LipL36 | LipL36, outer membrane lipoprotein                                          | NA |             |                             | OM      | 4.63  | 37620.1 |
| Q72N71 | LIC12966 | LipL41 | LipL41 lipoprotein                                                          | NA |             |                             | OM      | 7.96  | 38938.7 |
| Q72W18 | LIC10123 |        | LipL45-related lipoprotein                                                  | NA | COG4254,S   |                             | NON-CYT | 8.85  | 33712.4 |
| Q72RB4 | LIC11834 |        | LipL45-related lipoprotein                                                  | NA | COG4254,S   |                             | NON-CYT | 4.91  | 34682   |

|        |          |        |                                                          |    |             |          |         |       |         |
|--------|----------|--------|----------------------------------------------------------|----|-------------|----------|---------|-------|---------|
| Q75FJ7 | LIC20185 |        | LipL45-related lipoprotein                               | NA |             |          | NON-CYT | 8.45  | 26204.9 |
| Q72TW2 | LIC10902 |        | LipL45-related protein                                   | NA |             |          | UNK     | 9.84  | 41705.5 |
| Q72TL5 | LIC11003 | LipL71 | LipL71 lipoprotein                                       | NA |             |          | NON-CYT | 5.34  | 62027.3 |
| Q72RU5 | LIC11643 | LipL45 | Lipoprotein LipL45                                       | NA | COG4254,S   |          | IM      | 7.59  | 42101   |
| Q72VR4 | LIC10232 | LolE-1 | Lipoprotein releasing system, LolE permease component    | NA | COG4591,M   |          | IM      | 9.56  | 50974.3 |
| Q72SM7 | LIC11352 | LipL32 | Major outer membrane protein (MOMP), LipL32 lipoprotein  | NA |             |          | OM      | 6.81  | 29612.9 |
| Q72QK7 | LIC12106 |        | Membrane-associated HD superfamily hydrolase             | NA | COG1480,R   |          | IM      | 8.73  | 91067.6 |
| Q72LR2 | LIC13491 | ArgE   | Metallopeptidase                                         | NA | COG0624,E   |          | CYT     | 8.73  | 53758   |
| Q72QH2 | LIC12141 |        | N-acetyl glucosamine/N-acetyl galactosamine epimerase    | NA | COG1086,M,G |          | CYT     | 8.57  | 38942   |
| Q72W91 | LIC10046 | PntA   | NAD(P)(+) transhydrogenase (AB-specific), alpha subunit  | NA | COG3288,C   | 1.6.1.2  | IM      | 10.11 | 41418.8 |
| Q72VK7 | LIC10290 | PntB   | NAD(P)(+) transhydrogenase , beta component              | NA | COG1282,C   | 1.6.1.2  | IM      | 5.41  | 49189.7 |
| Q72NT7 | LIC12742 | NuoB   | NADH dehydrogenase (ubiquinone), B chain                 | NA | COG0377,C   | 1.6.5.3  | CYT     | 7.82  | 20577.8 |
| Q72NT6 | LIC12743 | NuoC   | NADH dehydrogenase (ubiquinone), C chain                 | NA | COG0852,C   | 1.6.5.3  | CYT     | 5.63  | 20599.5 |
| Q72NT5 | LIC12744 | NuoD   | NADH dehydrogenase (ubiquinone), D chain                 | NA | COG0649,C   | 1.6.5.3  | CYT     | 6.09  | 46117   |
| Q72NT4 | LIC12745 | NuoE   | NADH dehydrogenase (ubiquinone), E chain                 | NA | COG1905,C   | 1.6.5.3  | CYT     | 4.72  | 18209.6 |
| Q72NT3 | LIC12746 | NuoF   | NADH dehydrogenase (ubiquinone), F chain                 | NA | COG1894,C   | 1.6.5.3  | CYT     | 7.47  | 48529.6 |
| Q72NT2 | LIC12747 | NuoH   | NADH dehydrogenase (ubiquinone), H chain                 | NA | COG1005,C   | 1.6.5.3  | IM      | 8.28  | 38964.3 |
| Q72NU9 | LIC12730 |        | NHL repeat protein                                       | NA | COG3391,S   |          | OM      | 9.72  | 76452.1 |
| Q72M65 | LIC13326 | Ndk    | Nucleoside-diphosphate kinase                            | NA | COG0105,F   | 2.7.4.6  | CYT     | 7.67  | 15254.4 |
| Q72QB0 | LIC12202 |        | Nucleoside-diphosphate-sugar epimerase                   | NA | COG0451,M,G |          | CYT     | 6.69  | 36606.6 |
| Q72VV5 | LIC10191 |        | OmpA-family lipoprotein                                  | NA | COG2885,M   |          | NON-CYT | 8.98  | 20912.5 |
| Q72UR5 | LIC10592 |        | OmpA-family protein                                      | NA | COG2885,M   |          | OM      | 9.42  | 53006   |
| Q75FE4 | LIC20250 |        | OmpA-family protein                                      | NA | COG2885,M   |          | OM      | 10.09 | 44251   |
| Q72T26 | LIC11195 | ArgF   | Ornithine carbamoyltransferase                           | NA | COG0078,E   | 2.1.3.3  | CYT     | 6.52  | 35415.7 |
| Q72LZ8 | LIC13395 |        | OsmC/Ohr family protein                                  | NA | COG1764,O   |          | CYT     | 6.95  | 17725.1 |
| Q72UY1 | LIC10522 |        | Oxidoreductase                                           | NA | COG0673,R   |          | CYT     | 6.76  | 36036.5 |
| Q72RG3 | LIC11782 |        | Oxidoreductase                                           | NA | COG1651,O   |          | CYT     | 7.92  | 39757.4 |
| Q72VS6 | LIC10220 |        | ParA-like protein                                        | NA | COG1192,D   |          | CYT     | 6.68  | 28607.1 |
| Q72LR5 | LIC13488 |        | ParB-like protein                                        | NA | COG1475,K   |          | CYT     | 10.18 | 32511.6 |
| Q72RA9 | LIC11839 | PpiB-2 | Peptidylprolyl isomerase                                 | NA | COG0652,O   | 5.2.1.8  | CYT     | 8.56  | 32428.1 |
| Q72RF2 | LIC11793 | SppA-2 | Periplasmic serine protease (ClpP class)                 | NA | COG0616,O,U | 3.4.21.- | NON-CYT | 9.29  | 36644.4 |
| Q72LX7 | LIC13416 |        | Permease                                                 | NA | COG3329,R   |          | IM      | 7.14  | 34684.4 |
| Q72VT0 | LIC10216 | PckA   | Phosphoenolpyruvate carboxykinase (ATP)                  | NA | COG1866,C   | 4.1.1.49 | CYT     | 7.25  | 59174.3 |
| P62414 | LIC12091 | Pgk    | Phosphoglycerate kinase                                  | NA | COG0126,G   | 2.7.2.3  | CYT     | 10.06 | 43002   |
| Q72MW8 | LIC13071 |        | Phospholipid binding protein                             | NA | COG1881,R   |          | NON-CYT | 9.55  | 19958.8 |
| Q72UH7 | LIC10680 | PurS   | Phosphoribosylformylglycinamide synthase                 | NA | COG1828,F   | 6.3.5.3  | CYT     | 7.35  | 9299.86 |
| Q75FP0 | LIC20142 |        | Phosphoribosyltransferase                                | NA | COG0503,F   |          | CYT     | 6.54  | 19281.6 |
| Q72VY8 | LIC10157 | YidC   | Preprotein translocase, YidC subunit                     | NA | COG0706,U   |          | IM      | 9.33  | 71489.4 |
| Q72TF8 | LIC11063 | Lgt    | Prolipoprotein diacylglyceryltransferase                 | NA | COG0682,M   | 2.4.99.- | IM      | 8.18  | 36707.9 |
| P62217 | LIC11745 | RecA   | RecA recombinase                                         | NA | COG0468,L   |          | CYT     | 6.95  | 39686.6 |
| Q72UV0 | LIC10557 |        | Receiver component of a response regulator               | NA | COG2204,T   |          | CYT     | 6.80  | 26017.3 |
| Q72MV1 | LIC13088 |        | Receiver component of a two-component response regulator | NA | COG2197,T,K |          | CYT     | 7.16  | 24519.3 |
| Q72V73 | LIC10429 | PrsA   | Ribose-phosphate diphosphokinase                         | NA | COG0462,FE  | 2.7.6.1  | CYT     | 7.18  | 33846.9 |
| Q72SG0 | LIC11423 |        | RNA binding protein                                      | NA | COG0724,R   |          | CYT     | 10.20 | 12996.6 |
| Q72VS1 | LIC10225 |        | RNA polymerase sigma subunit                             | NA | COG1595,K   |          | CYT     | 5.88  | 35445.4 |
| Q72QX3 | LIC11985 |        | RNA-binding protein                                      | NA | COG0724,R   |          | CYT     | 9.55  | 10151.5 |
| Q75FU8 | LIC20083 | SahH   | S-adenosylhomocysteine hydrolase                         | NA | COG0499,H   | 3.3.1.1  | CYT     | 6.08  | 48233.3 |
| Q72W77 | LIC10060 |        | Serine phosphatase RsbU, regulator of sigma subunit      | NA | COG2208,T,K |          | IM      | 6.46  | 122167  |
| Q72NL3 | LIC12821 |        | Shape determination protein                              | NA | COG1664,M   |          | UNK     | 9.06  | 15851.2 |

|        |              |        |                                                         |    |               |           |         |       |         |
|--------|--------------|--------|---------------------------------------------------------|----|---------------|-----------|---------|-------|---------|
| Q72UF7 | LIC10700     |        | Short chain dehydrogenase                               | NA | COG1028,I,Q,R |           | CYT     | 8.44  | 27169.2 |
| Q72SL5 | LIC11364     |        | Short chain dehydrogenase                               | NA | COG0300,R     |           | CYT     | 10.04 | 28597.3 |
| Q72R22 | LIC11929     |        | Short chain dehydrogenase                               | NA | COG0300,R     |           | CYT     | 10.35 | 26948.5 |
| Q72P25 | LIC12320     |        | Short chain dehydrogenase                               | NA | COG1028,I,Q,R |           | CYT     | 7.98  | 27134.4 |
| Q75G18 | LIC20026     |        | Short chain dehydrogenase                               | NA | COG0300,R     |           | CYT     | 10.74 | 26881.4 |
| Q75FT4 | LIC20097     |        | Short chain dehydrogenase                               | NA | COG4221,R     |           | CYT     | 10.15 | 29414.5 |
| Q72SY9 | LIC11233     | LepB-2 | Signal peptidase I                                      | NA | COG0681,U     | 3.4.21.89 | IM      | 6.20  | 38431.6 |
| Q72QN5 | LIC12078     |        | Signal transduction protein                             | NA | COG1639,T     |           | CYT     | 7.19  | 55889.8 |
| Q75FT1 | LIC20100     |        | Signal transduction protein                             | NA | COG1639,T     |           | CYT     | 7.03  | 31588.6 |
| Q72PZ1 | LIC12324     |        | Signal transduction protein with multiple domains       | NA | COG3899,R     |           | CYT     | 6.00  | 201611  |
| Q72QA2 | LIC12210     | lbpA-1 | Small heat shock protein (molecular chaperone)          | NA | COG0071,O     |           | CYT     | 6.81  | 15588.6 |
| Q72QA1 | LIC12211     | lbpA-2 | Small heat shock protein (molecular chaperone)          | NA | COG0071,O     |           | CYT     | 5.39  | 14999.9 |
| NA     | LIC2_SPN3825 | SpeE   | Spermidine synthase                                     | NA | COG0421,E     | 2.5.1.16  | CYT     | 6.28  | 31956.8 |
| Q72TK6 | LIC11013     |        | Substrate binding protein of an ABC transporter complex | NA | COG0747,E     |           | PER     | 8.85  | 70146   |
| Q72SV5 | LIC11267     |        | Substrate binding protein of an ABC transporter complex | NA | COG1613,P     |           | PER     | 9.66  | 37478.6 |
| Q72QB5 | LIC12197     |        | Sugar pyridoxal-phosphate-dependent aminotransferase    | NA | COG0399,M     |           | CYT     | 6.80  | 41048.9 |
| Q72QB4 | LIC12198     |        | Sugar pyridoxal-phosphate-dependent aminotransferase    | NA | COG0399,M     |           | CYT     | 6.99  | 41248.4 |
| Q72M24 | LIC13367     | CysI   | Sulfite reductase (NADPH), alpha subunit                | NA | COG0155,P     | 1.8.1.2   | CYT     | 6.62  | 62467.7 |
| Q72PZ4 | LIC12321     |        | Thioesterase                                            | NA | COG0824,R     |           | CYT     | 9.73  | 32907.3 |
| Q72TA6 | LIC11115     | SseA   | Thiosulfate sulfurtransferase                           | NA | COG2897,P     | 2.8.1.1   | CYT     | 9.51  | 31821.3 |
| Q72PK6 | LIC12465     | ThrS   | Threonine--tRNA ligase                                  | NA | COG0441,J     | 6.1.1.3   | CYT     | 6.71  | 73786   |
| Q72Q80 | LIC12232     |        | Thymidylate synthase                                    | NA | COG1351,F     |           | CYT     | 7.18  | 60923.1 |
| Q72PA0 | LIC12575     |        | ToIC-like protein                                       | NA | COG1538,M,U   |           | OM      | 9.51  | 59860.3 |
| Q75FH3 | LIC20216     | ExbB   | ToIQ-like transport protein                             | NA | COG0811,U     |           | IM      | 8.84  | 22190.9 |
| Q72W16 | LIC10125     |        | TPR-repeat-containing lipoprotein                       | NA |               |           | NON-CYT | 9.48  | 135262  |
| Q72QW8 | LIC11990     |        | TPR-repeat-containing protein                           | NA |               |           | OM      | 4.19  | 133846  |
| Q72UB3 | LIC10748     | NusG   | Transcription antiterminator                            | NA | COG0250,K     |           | CYT     | 7.51  | 20454.6 |
| Q72W09 | LIC10132     |        | Transcriptional regulator                               | NA | COG3604,K,T   |           | CYT     | 5.29  | 78157.9 |
| Q72VT2 | LIC10214     |        | Transcriptional regulator                               | NA | COG1329,K     |           | CYT     | 9.22  | 20555.8 |
| Q72QU3 | LIC12016     |        | Transcriptional regulator                               | NA | COG1476,K     |           | CYT     | 9.98  | 16502.3 |
| Q72PN0 | LIC12438     |        | Transcriptional regulator                               | NA |               |           | CYT     | 8.91  | 16753.1 |
| Q72PL8 | LIC12452     |        | Transcriptional regulator                               | NA | COG1386,K     |           | CYT     | 4.66  | 19707.8 |
| Q72PC7 | LIC12544     |        | Transcriptional regulator                               | NA | COG1426,S     |           | CYT     | 5.02  | 41529.1 |
| Q72RX1 | LIC11617     |        | Transcriptional regulator, ArsR family                  | NA | COG0640,K     |           | CYT     | 10.47 | 11178   |
| Q72QB8 | LIC12194     | TktC   | Transketolase, C-terminal subunit                       | NA | COG3958,G     |           | CYT     | 5.92  | 34219.8 |
| Q72QL9 | LIC12094     | TpiA   | Triosephosphate isomerase                               | NA | COG0149,G     | 5.3.1.1   | CYT     | 7.56  | 27237.2 |
| Q75FN9 | LIC20143     |        | Trypsin-like serine protease                            | NA | COG0265,O     |           | NON-CYT | 8.66  | 56920.9 |
| Q72QB3 | LIC12199     | GalE   | UDP-glucose 4-epimerase                                 | NA | COG0451,MG    | 5.1.3.2   | CYT     | 6.64  | 36998.2 |
| Q72UV9 | LIC10548     |        | Uracil-DNA glycosylase                                  | NA | COG1573,L     | 3.2.2.-   | CYT     | 9.23  | 22821.5 |
| Q72M95 | LIC13293     |        | Zinc dependent protease                                 | NA | COG4783,R     |           | NON-CYT | 8.75  | 74852.5 |
| Q72VP3 | LIC10253     |        | Zinc-binding dehydrogenase                              | NA | COG1064,R     |           | CYT     | 7.59  | 45516.2 |
| Q72MD1 | LIC13257     |        | Zn-dependent oxidoreductase                             | NA | COG0604,C     |           | CYT     | 9.88  | 37404.6 |
| Q72U93 | LIC10768     |        | Zn-dependent peptidase                                  | NA | COG0612,R     |           | NON-CYT | 8.45  | 62280.5 |
| Q72U92 | LIC10769     |        | Zn-dependent peptidase                                  | NA | COG0612,R     |           | NON-CYT | 9.71  | 64109.1 |
