# Supplementary material
Source: PubMed Central journal article supplement (PMC2757032)
Supplement: pr9004597_si_005.pdf [file pr9004597_si_005.pdf]

Table S2 Peptide evidence for all identified proteins. Modification names follow the HUPO-PSI Modification Nomenclature for Mass Spectrometry standard (<http://www.unimod.org>).

| KEGG Locus ID | ProteinPilot Score (Unused) | %Coverage (95) | Sequence                        | Modifications                                                                                         | Cleavages                                      | dMass   | Precursor MW | Precursor m/z | Theoretical MW | Theoretical m/z | Theoretical z | Time  |
|---------------|-----------------------------|----------------|---------------------------------|-------------------------------------------------------------------------------------------------------|------------------------------------------------|---------|--------------|---------------|----------------|-----------------|---------------|-------|
| LIC11768      |                             |                |                                 |                                                                                                       |                                                |         |              |               |                |                 |               |       |
|               | 2                           | 4.7            | AISVLK                          | ITRAQ4plex@N-term; ITRAQ4plex(K)@6                                                                    | cleaved I-A@N-term                             | 0.0166  | 917.6320     | 459.8232      | 917.6153       | 459.8149        | 2             | 40.23 |
|               | 6                           | 14.2           | EGFVGGIADK                      | ITRAQ4plex@N-term; ITRAQ4plex(K)@11                                                                   |                                                | 0.0294  | 1392.8151    | 697.4148      | 1392.7856      | 697.4001        | 2             | 44.87 |
|               | 6                           | 14.2           | ETLPPEKQPER                     | ITRAQ4plex@N-term; ITRAQ4plex(K)@7                                                                    | cleaved W-E@N-term; missed K-Q@7               | -0.0053 | 1610.8818    | 537.9679      | 1610.8872      | 537.9697        | 3             | 26.22 |
|               | 6                           | 14.2           | GVANPIAQLVSAALMLR               | ITRAQ4plex@N-term                                                                                     |                                                | -0.0222 | 1867.0613    | 934.5379      | 1867.0835      | 934.5490        | 2             | 4.48  |
|               | 6                           | 14.2           | NVAVLSGDGIGPEVM EIAISVLK        | ITRAQ4plex@N-term; ITRAQ4plex(K)@23                                                                   |                                                | -1.0956 | 2597.3591    | 866.7936      | 2598.4546      | 867.1588        | 3             | 50.88 |
|               | 2                           | 4.7            | TGHPPLPETLK                     | ITRAQ4plex@N-term; ITRAQ4plex(K)@11                                                                   |                                                | -0.0092 | 1476.8452    | 493.2890      | 1476.8544      | 493.2921        | 3             | 38.98 |
|               | 6                           | 14.2           | VGST                            | ITRAQ4plex@N-term                                                                                     | cleaved E-V@N-term; cleaved T-I@C-term         | 0.0213  | 506.3035     | 507.3108      | 506.2822       | 507.2895        | 1             | 57.37 |
|               | 2                           | 4.7            | YSRREIERIAK                     | No ITRAQ4plex@N-term; Oxidation(R)@8; ITRAQ4plex(K)@11                                                | missed R-R@3; missed R-E@4; missed R-I@8       | -0.0455 | 1579.8461    | 527.6226      | 1579.8916      | 527.6378        | 3             | 39.58 |
| LIC12771      |                             |                |                                 |                                                                                                       |                                                |         |              |               |                |                 |               |       |
|               | 6                           | 9.1            | EIAALPDPIGEVR                   | ITRAQ4plex@N-term                                                                                     |                                                | 0.0102  | 1623.9056    | 812.9601      | 1623.8954      | 812.9550        | 2             | 33.53 |
|               | 6                           | 9.1            | FLDLR                           | ITRAQ4plex@N-term                                                                                     | cleaved E-F@N-term                             | 0.1173  | 806.5945     | 404.3045      | 806.4772       | 404.2459        | 2             | 15.65 |
|               | 6                           | 9.1            | GGGLIRFVSENSK                   | No ITRAQ4plex@N-term; Deamidated(N)@12; ITRAQ4plex(K)@14                                              | missed R-F@7                                   | -0.0126 | 1636.8417    | 819.4281      | 1636.8542      | 819.4344        | 2             | 26.42 |
|               | 6                           | 9.1            | GITLPLNGLELVTR                  | ITRAQ4plex@N-term; Deamidated(N)@6                                                                    |                                                | -0.0062 | 1526.8728    | 764.4437      | 1526.8790      | 764.4468        | 2             | 34.16 |
|               | 6                           | 9.1            | GPMLVHLTTTTYYT GNGQIR           | ITRAQ4plex@N-term; Oxidation(P)@2; ITRAQ4plex(T)@9                                                    |                                                | 0.0895  | 2620.4783    | 874.5000      | 2620.3887      | 874.4702        | 3             | 52.53 |
|               | 6                           | 9.1            | IFSMASAVR                       | ITRAQ4plex@N-term                                                                                     |                                                | 0.0380  | 1124.6514    | 563.3329      | 1124.6134      | 563.3140        | 2             | 26.69 |
|               | 6                           | 9.1            | ILLSLADLLEK                     | ITRAQ4plex@N-term; ITRAQ4plex(K)@11                                                                   |                                                | -0.0137 | 1514.9391    | 758.4768      | 1514.9527      | 758.4836        | 2             | 0.63  |
|               | 6                           | 9.1            | LLDP                            | No ITRAQ4plex@N-term                                                                                  | cleaved L-L@N-term; cleaved P-S@C-term         | 0.0110  | 456.2694     | 457.2766      | 456.2584       | 457.2657        | 1             | 56.48 |
|               | 6                           | 9.1            | LYPK                            | ITRAQ4plex@N-term; ITRAQ4plex(K)@4                                                                    | cleaved A-L@N-term                             | 0.0551  | 807.5649     | 404.7897      | 807.5098       | 404.7622        | 2             | 43.69 |
|               | 6                           | 9.1            | VTGNGQIR                        | ITRAQ4plex@N-term; Deamidated(N)@4                                                                    | cleaved Y-V@N-term                             | 0.0007  | 988.5430     | 495.2788      | 988.5423       | 495.2784        | 2             | 31.88 |
| LIC10753      |                             |                |                                 |                                                                                                       |                                                |         |              |               |                |                 |               |       |
|               | 2                           | 5.6            | AAGVEEMVK                       | ITRAQ4plex@N-term; ITRAQ4plex(K)@9                                                                    | cleaved L-A@N-term                             | 0.0219  | 1220.6898    | 611.3522      | 1220.6678      | 611.3412        | 2             | 25.33 |
|               | 2                           | 5.6            | ARVMAQEDMPYMED GSPVDIVLNPLGVPSR | No ITRAQ4plex@N-term                                                                                  | cleaved V-A@N-term; missed R-V@2               | -0.1182 | 3285.4651    | 822.3735      | 3285.5832      | 822.4031        | 4             | 40.92 |
|               | 2                           | 5.6            | AVIRLIK                         | ITRAQ4plex@N-term; Deamidated(R)@4; No ITRAQ4plex(K)@8                                                | missed R-L@4                                   | -0.0887 | 1069.6459    | 535.8302      | 1069.7345      | 535.8745        | 2             | 41.55 |
|               | 2                           | 5.6            | DDIDLGNR                        | ITRAQ4plex@N-term                                                                                     | cleaved P-D@N-term                             | 0.0297  | 1197.6156    | 400.2125      | 1197.5860      | 400.2026        | 3             | 26.31 |
|               | 2                           | 5.6            | DIPNLSDK                        | ITRAQ4plex@N-term; ITRAQ4plex(K)@8                                                                    |                                                | -0.0251 | 1188.6343    | 595.3244      | 1188.6594      | 595.3370        | 2             | 28.58 |
|               | 2                           | 5.6            | EDEFKSKKK                       | ITRAQ4plex@N-term; Oxidation(F)@4; ITRAQ4plex(K)@6; Deamidated(N)@7; ITRAQ4plex(K)@8; ITRAQ4plex(K)@9 | cleaved Y-E@N-term; missed K-N@6; missed K-K@8 | -0.0112 | 1716.9270    | 573.3163      | 1716.9381      | 573.3200        | 3             | 32.57 |
|               | 2                           | 5.6            | EFNNPK                          | ITRAQ4plex@N-term; ITRAQ4plex(K)@6                                                                    | cleaved F-E@N-term                             | 0.0033  | 1035.5626    | 518.7886      | 1035.5593      | 518.7869        | 2             | 25.85 |
|               | 2                           | 5.6            | ETQLGFAAKK                      | ITRAQ4plex@N-term; Deamidated(Q)@3; ITRAQ4plex(K)@9; ITRAQ4plex(K)@10                                 | cleaved F-E@N-term; missed K-K@9               | -0.0024 | 1524.8853    | 509.3024      | 1524.8877      | 509.3032        | 3             | 38.42 |
|               | 2                           | 5.6            | FEFNNPK                         | ITRAQ4plex@N-term; ITRAQ4plex(K)@7                                                                    |                                                | 0.0003  | 1182.6281    | 592.3213      | 1182.6277      | 592.3211        | 2             | 29.52 |
|               | 2                           | 5.6            | GIHSIKPGIPESFNVLV QELR          | ITRAQ4plex@N-term; ITRAQ4plex(K)@6                                                                    |                                                | -0.0227 | 2620.4717    | 874.4979      | 2620.4944      | 874.5054        | 3             | 46.06 |
|               | 2                           | 5.6            | GSWLEFEMDNK                     | ITRAQ4plex@N-term; ITRAQ4plex(K)@11                                                                   |                                                | 0.0382  | 1642.8287    | 822.4216      | 1642.7905      | 822.4025        | 2             | 52.20 |
|               | 2                           | 5.6            | GTFIINGAER                      | No ITRAQ4plex@N-term                                                                                  | cleaved H-G@N-term                             | -0.0210 | 1076.5405    | 539.2775      | 1076.5615      | 539.2880        | 2             | 26.53 |
|               | 2                           | 5.6            | IANQ                            | No ITRAQ4plex@N-term                                                                                  | cleaved L-I@N-term; cleaved Q-L@C-term         | 0.0199  | 444.2532     | 445.2605      | 444.2332       | 445.2405        | 1             | 67.42 |

|          |       |      |                                  |                                                                                  |                                                         |         |           |          |           |          |   |       |
|----------|-------|------|----------------------------------|----------------------------------------------------------------------------------|---------------------------------------------------------|---------|-----------|----------|-----------|----------|---|-------|
|          | 2     | 5.6  | KFPATLLVK                        | ITRAQ4plex@N-term;<br>ITRAQ4plex(K)@1;<br>ITRAQ4plex(K)@9                        | missed K-F@1                                            | -0.0223 | 1447.9269 | 483.6496 | 1447.9492 | 483.6570 | 3 | 34.70 |
|          | 2     | 5.6  | LAHLVDDK                         | ITRAQ4plex@N-term;<br>Methyl(D)@6; ITRAQ4plex(K)@8                               |                                                         | 0.0133  | 1211.7251 | 606.8698 | 1211.7118 | 606.8632 | 2 | 31.26 |
|          | 2     | 5.6  | LGQEITRDIPIPLSDK                 | ITRAQ4plex@N-term;<br>ITRAQ4plex(S)@14;<br>ITRAQ4plex(K)@16                      | missed R-D@8                                            | 0.0332  | 2258.2927 | 753.7715 | 2258.2596 | 753.7605 | 3 | 32.20 |
|          | 2     | 5.6  | LIKF                             | ITRAQ4plex@N-term;<br>ITRAQ4plex(K)@3                                            | cleaved P-L@N-term; cleaved F-K@C-term;<br>missed K-F@3 | 0.0187  | 807.5649  | 404.7897 | 807.5462  | 404.7804 | 2 | 43.69 |
|          | 2     | 5.6  | LISTRHR                          | ITRAQ4plex@N-term;<br>Phospho(T)@4                                               | missed R-H@5                                            | -0.0147 | 1105.5732 | 553.7939 | 1105.5879 | 553.8012 | 2 | 30.94 |
|          | 2     | 5.6  | LLHSIFGEK                        | ITRAQ4plex@N-term;<br>ITRAQ4plex(K)@9                                            |                                                         | 0.0092  | 1330.7944 | 444.6054 | 1330.7853 | 444.6024 | 3 | 34.29 |
|          | 2     | 5.6  | LNALGPGGLSRDR                    | No ITRAQ4plex@N-term                                                             | missed R-D@11                                           | -0.0539 | 1324.6674 | 663.3409 | 1324.7211 | 663.3678 | 2 | 26.44 |
|          | 2     | 5.6  | MAQSNSTVDEKGEFT<br>SKLISTR       | ITRAQ4plex@N-term;<br>ITRAQ4plex(K)@11;<br>ITRAQ4plex(K)@17                      | cleaved Y-M@N-term; missed K-G@11;<br>missed K-L@17     | -0.1681 | 2860.3286 | 716.0894 | 2860.4966 | 716.1314 | 4 | 45.03 |
|          | 2     | 5.6  | QAVPL                            | No ITRAQ4plex@N-term                                                             | cleaved L-L@C-term                                      | -0.0229 | 526.2886  | 527.2959 | 526.3115  | 527.3188 | 1 | 38.14 |
|          | 2     | 5.6  | QELLTIKSDMLGR                    | ITRAQ4plex@N-term;<br>ITRAQ4plex(K)@7                                            | cleaved L-Q@N-term; missed K-S@7                        | -0.0303 | 1906.0134 | 636.3451 | 1906.0437 | 636.3552 | 3 | 32.88 |
|          | 2     | 5.6  | QLGF                             | Gln->pyro-Glu@N-term                                                             | cleaved T-Q@N-term; cleaved F-A@C-term                  | 0.0187  | 446.2352  | 447.2425 | 446.2165  | 447.2238 | 1 | 18.25 |
|          | 2     | 5.6  | QTPQ                             | Gln->pyro-Glu@N-term                                                             | cleaved Q-Q@N-term; cleaved Q-L@C-term                  | -0.0274 | 455.1743  | 456.1815 | 455.2016  | 456.2089 | 1 | 58.10 |
|          | 2     | 5.6  | RHGNK                            | ITRAQ4plex@N-term;<br>ITRAQ4plex(K)@5                                            | cleaved G-R@N-term; missed R-H@1                        | 0.0336  | 898.5677  | 450.2911 | 898.5341  | 450.2743 | 2 | 42.38 |
|          | 2     | 5.6  | VGAEVKPGDILVMV<br>TPK            | ITRAQ4plex@N-term;<br>Methyl(E)@4; ITRAQ4plex(K)@6;<br>ITRAQ4plex(K)@18          |                                                         | -0.0094 | 2255.3193 | 752.7804 | 2255.3288 | 752.7836 | 3 | 34.75 |
|          | 2     | 5.6  | VLNP                             | ITRAQ4plex@N-term;<br>Deamidated(N)@3                                            | cleaved I-V@N-term; cleaved P-L@C-term                  | 0.0104  | 586.3553  | 587.3625 | 586.3448  | 587.3521 | 1 | 53.86 |
|          | 2     | 5.6  | VMAQEDMPYMEDGS<br>PVDIVLNPLGVPSR | ITRAQ4plex@N-term;<br>Deamidated(Q)@4;<br>Phospho(S)@14;<br>Deamidated(N)@21     |                                                         | -0.0103 | 3284.4712 | 822.1251 | 3284.4814 | 822.1276 | 4 | 40.82 |
|          | 2     | 5.6  | VNFGK                            | ITRAQ4plex@N-term;<br>ITRAQ4plex(K)@5                                            |                                                         | -0.0041 | 851.5068  | 426.7607 | 851.5109  | 426.7627 | 2 | 27.80 |
|          | 2     | 5.6  | VTQQPLGGK                        | ITRAQ4plex@N-term;<br>Deamidated(Q)@4;<br>ITRAQ4plex(K)@9                        | cleaved L-V@N-term                                      | -0.0338 | 1215.6729 | 608.8437 | 1215.7067 | 608.8606 | 2 | 27.52 |
|          | 2     | 5.6  | YGDFGQILQK                       | ITRAQ4plex@N-term;<br>ITRAQ4plex(K)@10                                           |                                                         | 0.0192  | 1455.8158 | 486.2792 | 1455.7965 | 486.2728 | 3 | 27.61 |
| LIC10065 |       |      |                                  |                                                                                  |                                                         |         |           |          |           |          |   |       |
|          | 2     | 11.0 | LVIPESGLLLKPGILYL<br>GR          | ITRAQ4plex@N-term;<br>ITRAQ4plex(K)@11                                           |                                                         | -0.0068 | 2338.4526 | 780.4915 | 2338.4596 | 780.4938 | 3 | 37.76 |
| LIC10112 |       |      |                                  |                                                                                  |                                                         |         |           |          |           |          |   |       |
|          | 2     | 11.2 | GTGQQFDTEIPFFEH<br>MLSHISK       | ITRAQ4plex@N-term;<br>ITRAQ4plex(K)@23                                           |                                                         | 0.0046  | 2999.4778 | 750.8767 | 2999.4731 | 750.8756 | 4 | 46.61 |
|          | 2     | 11.2 | LGDK                             | ITRAQ4plex@N-term;<br>ITRAQ4plex(K)@4                                            | cleaved Q-L@N-term                                      | -0.0255 | 719.4166  | 720.4239 | 719.4421  | 720.4494 | 1 | 55.36 |
|          | 2     | 11.2 | LGGR                             | ITRAQ4plex@N-term                                                                | cleaved D-L@N-term                                      | 0.0557  | 545.3965  | 546.4037 | 545.3407  | 546.3480 | 1 | 54.94 |
|          | 2     | 11.2 | MAIAQDSAAAGAIPT<br>K             | ITRAQ4plex@N-term;<br>ITRAQ4plex(K)@17                                           |                                                         | -4.9987 | 1885.0138 | 629.3452 | 1890.0124 | 631.0114 | 3 | 29.49 |
| LIC10140 |       |      |                                  |                                                                                  |                                                         |         |           |          |           |          |   |       |
|          | 4     | 5.8  | AAFKPTSTIFK                      | ITRAQ4plex@N-term;<br>ITRAQ4plex(K)@4;<br>ITRAQ4plex(K)@11                       |                                                         | -0.0133 | 1641.9688 | 548.3302 | 1641.9819 | 548.3346 | 3 | 33.09 |
|          | 4     | 5.8  | AHVGGRRSSVRETIG<br>RVAAAAIAR     | ITRAQ4plex@N-term;<br>Oxidation(H)@2; Oxidation(R)@7                             | missed R-S@7; missed R-E@11; missed R-<br>V@16          | -0.0647 | 2537.3374 | 846.7864 | 2537.4020 | 846.8080 | 3 | 42.35 |
|          | 4     | 5.8  | IGDK                             | ITRAQ4plex@N-term;<br>ITRAQ4plex(K)@4                                            | cleaved N-I@N-term                                      | -0.0255 | 719.4166  | 720.4239 | 719.4421  | 720.4494 | 1 | 55.36 |
|          | 4     | 5.8  | PGQSNLTTPR                       | ITRAQ4plex@N-term;<br>Oxidation(P)@1                                             | cleaved R-P@N-term                                      | -0.0132 | 1229.6354 | 615.8250 | 1229.6486 | 615.8316 | 2 | 27.30 |
|          | 4     | 5.8  | RPGQSNLTTPR                      | ITRAQ4plex@N-term                                                                |                                                         | -0.0080 | 1369.7468 | 685.8807 | 1369.7548 | 685.8847 | 2 | 36.29 |
|          | 3.4   | 6.1  | RRPGQSNLTTPR                     | Carbamyl@N-term                                                                  | missed R-R@1                                            | 0.0028  | 1424.7623 | 475.9281 | 1424.7597 | 475.9272 | 3 | 34.50 |
|          | 4     | 5.8  | SREEVDQNEVR                      | ITRAQ4plex@N-term                                                                | missed R-E@2                                            | -0.0145 | 1503.7255 | 502.2491 | 1503.7399 | 502.2539 | 3 | 25.42 |
| LIC10216 |       |      |                                  |                                                                                  |                                                         |         |           |          |           |          |   |       |
|          | 15.62 | 18.3 | AQTQVKGLK                        | ITRAQ4plex@N-term;<br>Deamidated(Q)@2; No<br>ITRAQ4plex(K)@6;<br>ITRAQ4plex(K)@9 | cleaved Q-A@N-term; missed K-G@6                        | -0.0403 | 1260.7242 | 631.3694 | 1260.7645 | 631.3895 | 2 | 25.64 |
|          | 15.62 | 18.3 | DFDFTAFGPK                       | ITRAQ4plex@N-term;<br>ITRAQ4plex(K)@10                                           |                                                         | -0.0027 | 1431.7251 | 716.8698 | 1431.7278 | 716.8712 | 2 | 33.76 |

|          |       |      |                        |                                                                                    |                                                          |         |           |          |           |          |   |       |
|----------|-------|------|------------------------|------------------------------------------------------------------------------------|----------------------------------------------------------|---------|-----------|----------|-----------|----------|---|-------|
|          | 15.62 | 18.3 | DIYEAIR                | No iTRAQ4plex@N-term                                                               | cleaved P-D@N-term                                       | 0.0218  | 878.4716  | 879.4788 | 878.4498  | 879.4571 | 1 | 54.72 |
|          | 15.62 | 18.3 | EAWTDKAAVDQTA          | iTRAQ4plex@N-term;<br>Oxidation(W)@3;<br>iTRAQ4plex(K)@6;<br>iTRAQ4plex(K)@14      | missed K-A@6                                             | 0.0639  | 2045.1069 | 682.7096 | 2045.0431 | 682.6883 | 3 | 38.98 |
|          | 15.62 | 18.3 | ENFK                   | iTRAQ4plex@N-term;<br>iTRAQ4plex(K)@4                                              | cleaved N-E@N-term                                       | 0.0176  | 824.4812  | 413.2479 | 824.4636  | 413.2391 | 2 | 33.68 |
|          | 15.62 | 18.3 | GIFSVMNYK              | iTRAQ4plex@N-term;<br>iTRAQ4plex(K)@9                                              |                                                          | 0.0088  | 1345.7396 | 673.8771 | 1345.7308 | 673.8727 | 2 | 33.99 |
|          | 6     | 7.7  | GVLPVSKL               | iTRAQ4plex@N-term;<br>iTRAQ4plex(K)@8                                              | cleaved F-G@N-term; cleaved L-S@C-term;<br>missed K-L@8  | -0.0681 | 1196.7056 | 599.3600 | 1196.7736 | 599.3941 | 2 | 43.31 |
|          | 15.62 | 18.3 | ILDP                   | No iTRAQ4plex@N-term                                                               | cleaved A-I@N-term; cleaved P-R@C-term                   | 0.0110  | 456.2694  | 457.2766 | 456.2584  | 457.2657 | 1 | 56.48 |
|          | 15.62 | 18.3 | INFK                   | iTRAQ4plex@N-term;<br>iTRAQ4plex(K)@4                                              | cleaved H-I@N-term                                       | 0.0016  | 808.5067  | 405.2606 | 808.5051  | 405.2598 | 2 | 29.09 |
|          | 15.62 | 18.3 | KIIDEILNGNIEK          | iTRAQ4plex@N-term;<br>iTRAQ4plex(K)@1;<br>Deamidated(N)@8;<br>iTRAQ4plex(K)@13     | missed K-I@1                                             | 0.0127  | 1931.1432 | 644.7217 | 1931.1305 | 644.7174 | 3 | 35.53 |
|          | 15.62 | 18.3 | LSGTGK                 | iTRAQ4plex@N-term;<br>iTRAQ4plex(K)@6                                              | cleaved G-L@N-term                                       | 0.0193  | 849.5356  | 425.7751 | 849.5164  | 425.7655 | 2 | 30.19 |
|          | 15.62 | 18.3 | LSIEQAMYHFLSGYTA<br>K  | iTRAQ4plex@N-term;<br>iTRAQ4plex(K)@17                                             |                                                          | 0.0090  | 2246.1741 | 749.7319 | 2246.1649 | 749.7289 | 3 | 41.99 |
|          | 15.62 | 18.3 | NENFK                  | iTRAQ4plex@N-term;<br>Deamidated(N)@1;<br>iTRAQ4plex(K)@5                          |                                                          | 0.0667  | 939.5573  | 470.7859 | 939.4905  | 470.7525 | 2 | 31.47 |
|          | 15.62 | 18.3 | PIFHINNIQVPSKGGH<br>PK | No iTRAQ4plex@N-term;<br>Deamidated(N)@7;<br>iTRAQ4plex(K)@13;<br>iTRAQ4plex(K)@18 | cleaved Y-P@N-term; missed K-G@13                        | -0.0201 | 2271.2529 | 758.0916 | 2271.2732 | 758.0983 | 3 | 36.74 |
|          | 15.62 | 18.3 | QAQTQVK                | iTRAQ4plex@N-term;<br>Deamidated(Q)@5;<br>iTRAQ4plex(K)@7                          | cleaved M-Q@N-term                                       | 0.1626  | 1090.7853 | 546.3999 | 1090.6226 | 546.3186 | 2 | 55.20 |
|          | 15.62 | 18.3 | QAQTQVQGL              | iTRAQ4plex@N-term;<br>Deamidated(Q)@1;<br>iTRAQ4plex(K)@7                          | cleaved M-Q@N-term; cleaved L-K@C-<br>term; missed K-G@7 | -0.0077 | 1260.7205 | 631.3675 | 1260.7281 | 631.3713 | 2 | 25.74 |
|          | 15.62 | 18.3 | SEFVTHPVFQVAYPK        | iTRAQ4plex@N-term;<br>iTRAQ4plex(K)@15                                             |                                                          | -0.9898 | 2035.1078 | 679.3765 | 2036.0975 | 679.7064 | 3 | 48.29 |
|          | 15.62 | 18.3 | TEPDIYEAIR             | iTRAQ4plex@N-term                                                                  |                                                          | 0.0055  | 1349.7004 | 675.8575 | 1349.6949 | 675.8547 | 2 | 30.28 |
|          | 15.62 | 18.3 | TISGVDSAILDPR          | iTRAQ4plex@N-term                                                                  |                                                          | -0.0036 | 1486.8077 | 744.4111 | 1486.8113 | 744.4129 | 2 | 31.34 |
|          | 15.62 | 18.3 | TTLSTDPNRK             | iTRAQ4plex@N-term;<br>iTRAQ4plex(K)@10                                             | missed R-K@9                                             | -0.0018 | 1419.7906 | 474.2708 | 1419.7925 | 474.2715 | 3 | 25.38 |
|          | 15.62 | 18.3 | VSYPIFHINNIQVPSK       | iTRAQ4plex@N-term;<br>iTRAQ4plex(Y)@3;<br>iTRAQ4plex(K)@16                         |                                                          | -0.0428 | 2287.2627 | 763.4282 | 2287.3054 | 763.4424 | 3 | 41.41 |
| LIC10272 |       |      |                        |                                                                                    |                                                          |         |           |          |           |          |   |       |
|          | 18.45 | 19.7 | ADFDYTHK               | iTRAQ4plex@N-term;<br>iTRAQ4plex(K)@8                                              |                                                          | -0.0355 | 1283.6035 | 428.8751 | 1283.6390 | 428.8869 | 3 | 29.17 |
|          | 18.45 | 19.7 | ANPQILEPIMK            | iTRAQ4plex@N-term;<br>iTRAQ4plex(K)@11                                             |                                                          | -0.0060 | 1540.8831 | 771.4488 | 1540.8891 | 771.4518 | 2 | 31.19 |
|          | 18.45 | 19.7 | EIPDDLKELAQK           | iTRAQ4plex@N-term;<br>iTRAQ4plex(K)@7;<br>iTRAQ4plex(K)@12                         |                                                          | -0.0091 | 1830.0374 | 611.0197 | 1830.0464 | 611.0227 | 3 | 33.97 |
|          | 18.45 | 19.7 | EYIQSVDK               | Glu->pyro-Glu@N-term;<br>iTRAQ4plex(K)@8                                           |                                                          | -0.0079 | 1106.5652 | 554.2899 | 1106.5730 | 554.2938 | 2 | 37.91 |
|          | 18.45 | 19.7 | GIVDLVTMK              | iTRAQ4plex@N-term;<br>iTRAQ4plex(K)@9                                              |                                                          | 0.0054  | 1262.7566 | 632.3856 | 1262.7512 | 632.3829 | 2 | 33.59 |
|          | 14.74 | 11.3 | GMGELHLEVYIER          | No iTRAQ4plex@N-term;<br>Oxidation(M)@2; Oxidation(H)@6                            |                                                          | 0.0942  | 1576.8497 | 789.4321 | 1576.7555 | 789.3850 | 2 | 49.47 |
|          | 18.45 | 19.7 | GSLIGFPIQIVR           | iTRAQ4plex@N-term                                                                  |                                                          | 0.0126  | 1371.8486 | 686.9316 | 1371.8360 | 686.9253 | 2 | 35.73 |
|          | 14.74 | 11.3 | HAIHEVR                | No iTRAQ4plex@N-term                                                               | cleaved I-H@N-term                                       | 0.0040  | 860.4657  | 431.2401 | 860.4617  | 431.2381 | 2 | 39.19 |
|          | 18.45 | 19.7 | HLEVYIER               | iTRAQ4plex@N-term;<br>Oxidation(H)@1                                               | cleaved L-H@N-term                                       | -0.0150 | 1217.6377 | 406.8865 | 1217.6526 | 406.8915 | 3 | 37.89 |
|          | 18.45 | 19.7 | HNAVVPQIPIGLENDL<br>K  | iTRAQ4plex@N-term;<br>Deamidated(N)@14;<br>iTRAQ4plex(K)@17                        |                                                          | -0.0665 | 2145.1372 | 716.0530 | 2145.2037 | 716.0752 | 3 | 50.31 |
|          | 14.74 | 11.3 | IHAIHEVR               | Carbamyl@N-term                                                                    |                                                          | 0.0070  | 1016.5586 | 509.2866 | 1016.5516 | 509.2831 | 2 | 38.94 |
|          | 14.74 | 11.3 | ILFYTNR                | iTRAQ4plex@N-term                                                                  |                                                          | 0.0064  | 1069.6107 | 535.8126 | 1069.6042 | 535.8094 | 2 | 43.11 |
|          | 18.45 | 19.7 | LAFKL                  | iTRAQ4plex@N-term;<br>iTRAQ4plex(K)@4                                              | cleaved C-L@N-term; cleaved L-E@C-term;<br>missed K-L@4  | 0.0209  | 878.6042  | 440.3094 | 878.5833  | 440.2989 | 2 | 38.35 |
|          | 18.45 | 19.7 | LASPDVVKNK             | iTRAQ4plex@N-term;<br>iTRAQ4plex(K)@8;<br>iTRAQ4plex(K)@10                         | cleaved Y-L@N-term; missed K-N@8                         | -0.1009 | 1501.8185 | 751.9165 | 1501.9193 | 751.9669 | 2 | 29.59 |
|          | 18.45 | 19.7 | LLDGLVDYLASPDVVK       | iTRAQ4plex@N-term;<br>iTRAQ4plex(K)@16                                             |                                                          | 0.0065  | 2004.1451 | 669.0557 | 2004.1387 | 669.0535 | 3 | 39.01 |

|          |       |      |                                            |                                                                                                    |                                                         |         |           |           |           |           |   |       |
|----------|-------|------|--------------------------------------------|----------------------------------------------------------------------------------------------------|---------------------------------------------------------|---------|-----------|-----------|-----------|-----------|---|-------|
|          | 18.45 | 19.7 | MSNNK                                      | ITRAQ4plex@N-term;<br>ITRAQ4plex(K)@5                                                              | cleaved N-M@N-term                                      | 0.0386  | 880.5066  | 441.2606  | 880.4680  | 441.2413  | 2 | 25.22 |
|          | 14.74 | 11.3 | MTPVFMGSAFK                                | ITRAQ4plex@N-term;<br>ITRAQ4plex(K)@11                                                             |                                                         | 0.0052  | 1502.7921 | 752.4033  | 1502.7869 | 752.4007  | 2 | 46.14 |
|          | 18.45 | 19.7 | QGFK                                       | ITRAQ4plex@N-term;<br>ITRAQ4plex(K)@5                                                              |                                                         | 0.0069  | 880.5080  | 441.2613  | 880.5010  | 441.2578  | 2 | 25.12 |
|          | 14.74 | 11.3 | QSVD                                       | Gln->pyro-Glu@N-term                                                                               | cleaved I-Q@N-term; cleaved D-K@C-term                  | 0.1645  | 430.3345  | 431.3418  | 430.1700  | 431.1773  | 1 | 58.37 |
|          | 14.74 | 11.3 | RSST                                       | ITRAQ4plex@N-term                                                                                  | cleaved L-R@N-term; cleaved T-Q@C-term;<br>missed R-S@1 | 0.0082  | 593.3337  | 594.3409  | 593.3255  | 594.3328  | 1 | 50.51 |
|          | 18.45 | 19.7 | RTGT                                       | ITRAQ4plex@N-term                                                                                  | cleaved I-R@N-term; cleaved T-I@C-term;<br>missed R-T@1 | 0.0269  | 577.3574  | 578.3647  | 577.3306  | 578.3378  | 1 | 56.92 |
|          | 14.74 | 11.3 | SSTQGK                                     | ITRAQ4plex@N-term;<br>ITRAQ4plex(K)@6                                                              |                                                         | 0.0249  | 894.5264  | 448.2704  | 894.5014  | 448.2580  | 2 | 40.04 |
|          | 18.45 | 19.7 | STAVAEFKPSEK                               | ITRAQ4plex@N-term;<br>ITRAQ4plex(K)@8;<br>ITRAQ4plex(K)@12                                         | cleaved M-S@N-term                                      | -0.0246 | 1724.9429 | 575.9882  | 1724.9674 | 575.9964  | 3 | 29.80 |
|          | 18.45 | 19.7 | TEAEVPLADMFGYST<br>VLR                     | ITRAQ4plex@N-term                                                                                  |                                                         | 0.0148  | 2142.0935 | 1072.0540 | 2142.0789 | 1072.0467 | 2 | 39.02 |
|          | 18.45 | 19.7 | TEAEVPLADMFGYST<br>VLRSSSTQGKAIFSME<br>FSR | ITRAQ4plex@N-term;<br>Deamidated(R)@18;<br>ITRAQ4plex(K)@24;<br>Oxidation(F)@31                    | missed R-S@18; missed K-A@24                            | -0.0851 | 3975.8264 | 994.9639  | 3975.9114 | 994.9851  | 4 | 49.80 |
|          | 18.45 | 19.7 | VAFINK                                     | ITRAQ4plex@N-term;<br>ITRAQ4plex(K)@6                                                              |                                                         | -0.0072 | 978.6035  | 490.3090  | 978.6106  | 490.3126  | 2 | 29.70 |
|          | 18.45 | 19.7 | VAGYMEPIPLEETLDY<br>DFVNK                  | ITRAQ4plex@N-term;<br>ITRAQ4plex(K)@21                                                             |                                                         | -0.0154 | 2730.3552 | 911.1257  | 2730.3706 | 911.1308  | 3 | 37.55 |
|          | 18.45 | 19.7 | VEVDGPFSEFQGAILG<br>SLNQR                  | ITRAQ4plex@N-term                                                                                  |                                                         | -0.9636 | 2258.1982 | 753.7400  | 2259.1617 | 754.0612  | 3 | 43.19 |
|          | 14.74 | 11.3 | YGQLTYVR                                   | ITRAQ4plex@N-term                                                                                  |                                                         | 0.0041  | 1142.6248 | 572.3196  | 1142.6206 | 572.3176  | 2 | 39.78 |
| LIC10309 |       |      |                                            |                                                                                                    |                                                         |         |           |           |           |           |   |       |
|          | 2.2   | 1.3  | AAMA                                       | ITRAQ4plex@N-term                                                                                  | cleaved S-A@N-term; cleaved A-G@C-term                  | 0.0254  | 506.2899  | 507.2972  | 506.2645  | 507.2717  | 1 | 54.73 |
|          | 2.2   | 1.3  | AGVSLOPNAGSQGEY<br>AGLLAIRR                | ITRAQ4plex@N-term;<br>Deamidated(Q)@6;<br>Deamidated(N)@8                                          | cleaved F-A@N-term; missed R-R@22                       | 0.0171  | 2473.3218 | 825.4479  | 2473.3047 | 825.4422  | 3 | 38.12 |
|          | 2.2   | 1.3  | DLEDLK                                     | ITRAQ4plex@N-term;<br>ITRAQ4plex(K)@6                                                              | cleaved V-D@N-term                                      | 0.0097  | 1019.5840 | 510.7993  | 1019.5743 | 510.7944  | 2 | 27.23 |
|          | 2.2   | 1.3  | DQTK                                       | No ITRAQ4plex@N-term;<br>ITRAQ4plex(K)@4                                                           | cleaved A-D@N-term                                      | 0.0364  | 634.3772  | 635.3845  | 634.3408  | 635.3481  | 1 | 54.37 |
|          | 2.2   | 1.3  | IPLGS                                      | No ITRAQ4plex@N-term                                                                               | cleaved M-I@N-term; cleaved S-C@C-term                  | 0.0041  | 485.2891  | 486.2963  | 485.2849  | 486.2922  | 1 | 33.69 |
|          | 2.2   | 1.3  | NATT                                       | ITRAQ4plex@N-term                                                                                  | cleaved L-N@N-term; cleaved T-E@C-term                  | -0.0322 | 549.2558  | 550.2631  | 549.2880  | 550.2953  | 1 | 49.61 |
|          | 2.2   | 1.3  | NILENPGWYTAYTPY<br>QAEISQGR                | ITRAQ4plex@N-term;<br>Deamidated(N)@1;<br>Oxidation(W)@8;<br>Deamidated(Q)@16                      |                                                         | 0.1113  | 2832.4478 | 945.1566  | 2832.3364 | 945.1194  | 3 | 39.93 |
|          | 2.2   | 1.3  | NSPHTAAMVTSR                               | ITRAQ4plex@N-term                                                                                  |                                                         | -0.0099 | 1529.7279 | 510.9166  | 1529.7378 | 510.9199  | 3 | 26.18 |
|          | 2.2   | 1.3  | QNGT                                       | No ITRAQ4plex@N-term                                                                               | cleaved V-Q@N-term; cleaved T-L@C-term                  | 0.0606  | 418.2418  | 419.2491  | 418.1812  | 419.1885  | 1 | 49.86 |
|          | 2.2   | 1.3  | TDNPLKNSPHTAAMV<br>TSDRWDHLYPRER           | ITRAQ4plex@N-term;<br>Oxidation(P)@4;<br>ITRAQ4plex(K)@6;<br>Deamidated(R)@19;<br>Deamidated(R)@28 | missed K-N@6; missed R-W@19; missed R-E@26              | -0.0308 | 3612.7314 | 904.1901  | 3612.7623 | 904.1979  | 4 | 50.94 |
|          | 2.2   | 1.3  | TLQNQTKTNLEK                               | ITRAQ4plex@N-term;<br>Deamidated(N)@4;<br>ITRAQ4plex(K)@7;<br>ITRAQ4plex(K)@12                     | cleaved S-T@N-term; missed K-T@7                        | -0.0588 | 1849.9886 | 617.6702  | 1850.0475 | 617.6898  | 3 | 55.51 |
|          | 2.2   | 1.3  | VGTDPLDTFPR                                | Delta-(2)C(2)@N-term;<br>Methyl(T)@3                                                               |                                                         | 0.0041  | 1256.6442 | 629.3293  | 1256.6401 | 629.3273  | 2 | 33.97 |
| LIC10310 |       |      |                                            |                                                                                                    |                                                         |         |           |           |           |           |   |       |
|          | 1.7   | 6.9  | AETQAPTGYLFSEK                             | ITRAQ4plex@N-term;<br>ITRAQ4plex(K)@14                                                             | cleaved M-A@N-term                                      | -0.0766 | 1828.8684 | 915.4415  | 1828.9451 | 915.4798  | 2 | 41.69 |
|          | 1.7   | 6.9  | GFSTSELDK                                  | ITRAQ4plex@N-term;<br>ITRAQ4plex(K)@9                                                              |                                                         | 0.0080  | 1270.6729 | 636.3437  | 1270.6649 | 636.3397  | 2 | 29.00 |
|          | 1.7   | 6.9  | VDLP                                       | ITRAQ4plex@N-term                                                                                  | cleaved F-V@N-term; cleaved P-K@C-term                  | 0.0104  | 586.3553  | 587.3625  | 586.3448  | 587.3521  | 1 | 53.86 |
| LIC12875 |       |      |                                            |                                                                                                    |                                                         |         |           |           |           |           |   |       |
|          | 38.05 | 55.4 | AAEVYVLT                                   | ITRAQ4plex@N-term;<br>ITRAQ4plex(K)@9                                                              | cleaved F-A@N-term                                      | 0.0026  | 1280.7610 | 641.3878  | 1280.7584 | 641.3865  | 2 | 30.05 |
|          | 38.05 | 55.4 | ADMLAADER                                  | ITRAQ4plex@N-term                                                                                  |                                                         | 0.0087  | 1134.5548 | 568.2847  | 1134.5461 | 568.2803  | 2 | 27.45 |
|          | 38.05 | 55.4 | ADMLAADERAEMIEM<br>VEMDVR                  | No ITRAQ4plex@N-term;<br>Oxidation(D)@2; Arg->GluSA(R)@9                                           | missed R-A@9                                            | 0.2688  | 2397.2896 | 800.1038  | 2397.0208 | 800.0142  | 3 | 48.49 |
|          | 38.05 | 55.4 | AEMIEMVEMDVR                               | ITRAQ4plex@N-term                                                                                  |                                                         | 0.0200  | 1595.7679 | 798.8912  | 1595.7479 | 798.8812  | 2 | 54.96 |

|       |      |                             |                                                                                  |                                                   |         |           |          |           |          |   |       |
|-------|------|-----------------------------|----------------------------------------------------------------------------------|---------------------------------------------------|---------|-----------|----------|-----------|----------|---|-------|
| 38.05 | 55.4 | AGDNIGALLR                  | ITRAQ4plex@N-term                                                                | cleaved E-A@N-term                                | 0.0264  | 1142.6793 | 572.3469 | 1142.6530 | 572.3338 | 2 | 29.97 |
| 38.05 | 55.4 | ALEGESEIGMPAILK             | ITRAQ4plex@N-term;<br>ITRAQ4plex(K)@16                                           |                                                   | -0.0351 | 1960.0081 | 981.0113 | 1960.0431 | 981.0288 | 2 | 33.45 |
| 39.24 | 49.9 | APEEKARGITIATSHQ<br>EYETANR | ITRAQ4plex@N-term;<br>ITRAQ4plex(K)@5                                            | cleaved N-A@N-term; missed K-A@5;<br>missed R-G@7 | -2.1230 | 2857.3489 | 953.4569 | 2859.4719 | 954.1646 | 3 | 38.74 |
| 38.05 | 55.4 | AVAYDQIDNAPEEK              | ITRAQ4plex@N-term;<br>ITRAQ4plex(K)@14                                           |                                                   | -0.0168 | 1849.9133 | 925.9639 | 1849.9301 | 925.9723 | 2 | 28.35 |
| 38.05 | 55.4 | DQAEAGDNIGALLR              | ITRAQ4plex@N-term                                                                | cleaved L-D@N-term                                | 0.0521  | 1585.8702 | 793.9424 | 1585.8182 | 793.9164 | 2 | 57.31 |
| 39.24 | 49.9 | DQIDNAPEEK                  | ITRAQ4plex@N-term;<br>ITRAQ4plex(K)@10                                           | cleaved Y-D@N-term                                | 0.0018  | 1445.7260 | 723.8702 | 1445.7242 | 723.8694 | 2 | 33.51 |
| 38.05 | 55.4 | EEIERGQVLAKPGSIT<br>PHKK    | ITRAQ4plex@N-term;<br>ITRAQ4plex(K)@11;<br>ITRAQ4plex(K)@19;<br>ITRAQ4plex(K)@20 | missed R-G@5; missed K-K@19                       | -0.1968 | 2792.4392 | 699.1171 | 2792.6360 | 699.1663 | 4 | 49.74 |
| 38.05 | 55.4 | EHILLAR                     | ITRAQ4plex@N-term                                                                |                                                   | -0.0024 | 994.6021  | 498.3083 | 994.6045  | 498.3096 | 2 | 49.56 |
| 38.05 | 55.4 | FAAEVYVLTG                  | ITRAQ4plex@N-term;<br>ITRAQ4plex(K)@10                                           |                                                   | 0.0307  | 1427.8575 | 714.9360 | 1427.8268 | 714.9207 | 2 | 42.89 |
| 38.05 | 55.4 | FAIREGGR                    | ITRAQ4plex@N-term                                                                | missed R-E@4                                      | 0.1709  | 1048.7609 | 525.3877 | 1048.5900 | 525.3023 | 2 | 57.19 |
| 38.05 | 55.4 | GITIATSHQEYETANR            | ITRAQ4plex@N-term                                                                |                                                   | -0.0011 | 1933.9604 | 645.6608 | 1933.9616 | 645.6611 | 3 | 39.49 |
| 39.24 | 49.9 | GITIATSHQEYETANR<br>H       | Carbamylation@N-term                                                             | cleaved H-Y@C-term; missed R-H@16                 | 0.0001  | 1969.9244 | 657.6487 | 1969.9242 | 657.6487 | 3 | 38.34 |
| 38.05 | 55.4 | GQVLAKPGSITPH               | ITRAQ4plex@N-term;<br>ITRAQ4plex(K)@6                                            | cleaved H-K@C-term                                | -0.0076 | 1591.9213 | 531.6477 | 1591.9290 | 531.6503 | 3 | 28.99 |
| 39.24 | 49.9 | GQVLAKPGSITPHK              | Carbamylation@N-term;<br>ITRAQ4plex(K)@6;<br>ITRAQ4plex(K)@14                    |                                                   | 0.0053  | 1763.0350 | 588.6856 | 1763.0297 | 588.6839 | 3 | 39.90 |
| 38.05 | 55.4 | GTVATGRVEQGVLK              | No ITRAQ4plex@N-term;<br>ITRAQ4plex(K)@14                                        | missed R-V@7                                      | 0.0215  | 1557.9175 | 520.3131 | 1557.8960 | 520.3060 | 3 | 34.06 |
| 38.05 | 55.4 | HTPFINNYRPOFYFR             | ITRAQ4plex@N-term;<br>Deamidated(N)@6                                            |                                                   | -0.0686 | 2144.0027 | 537.0079 | 2144.0714 | 537.0251 | 4 | 43.75 |
| 39.24 | 49.9 | IGIR                        | ITRAQ4plex@N-term                                                                | cleaved I-I@N-term; cleaved R-P@C-term            | 0.0075  | 601.4109  | 602.4182 | 601.4033  | 602.4106 | 1 | 53.62 |
| 39.24 | 49.9 | INNYRPOFYFR                 | ITRAQ4plex@N-term;<br>Deamidated(N)@2                                            | cleaved F-I@N-term                                | 0.0088  | 1661.8524 | 554.9581 | 1661.8436 | 554.9551 | 3 | 45.99 |
| 38.05 | 55.4 | ITGRGTVATGR                 | ITRAQ4plex@N-term                                                                | cleaved S-I@N-term; missed R-G@4                  | 0.0273  | 1231.7393 | 616.8769 | 1231.7119 | 616.8632 | 2 | 59.85 |
| 38.05 | 55.4 | KLLDQAEAGDNIGALL<br>R       | ITRAQ4plex@N-term;<br>ITRAQ4plex(K)@1                                            | missed K-L@1                                      | -0.0057 | 2084.1777 | 695.7332 | 2084.1833 | 695.7351 | 3 | 34.35 |
| 38.05 | 55.4 | KLMEALDTFVNPVK              | ITRAQ4plex@N-term;<br>ITRAQ4plex(K)@1;<br>ITRAQ4plex(K)@14                       | cleaved L-K@N-term; missed K-L@1                  | 0.0060  | 2034.1609 | 679.0609 | 2034.1549 | 679.0589 | 3 | 36.83 |
| 39.24 | 49.9 | LDQAEAGDNIGALLR             | ITRAQ4plex@N-term;<br>Dehydrated(D)@2                                            | cleaved L-L@N-term                                | -1.0056 | 1679.8861 | 840.9503 | 1680.8917 | 841.4531 | 2 | 47.58 |
| 38.05 | 55.4 | LLDQAEAGDNIGALLR            | ITRAQ4plex@N-term                                                                |                                                   | -0.0204 | 1811.9659 | 906.9902 | 1811.9863 | 907.0004 | 2 | 34.64 |
| 38.05 | 55.4 | LMEALDTFV                   | ITRAQ4plex@N-term;<br>Dehydrated(T)@7                                            | cleaved V-P@C-term                                | 0.0054  | 1163.6073 | 582.8109 | 1163.6018 | 582.8082 | 2 | 35.85 |
| 38.05 | 55.4 | LMEALDTFVNPVK               | ITRAQ4plex@N-term;<br>ITRAQ4plex(K)@13                                           |                                                   | -0.0108 | 1761.9471 | 881.9808 | 1761.9579 | 881.9862 | 2 | 35.64 |
| 38.05 | 55.4 | LMPVEDVFSITGR               | ITRAQ4plex@N-term;<br>ITRAQ4plex(T)@11                                           | cleaved F-L@N-term                                | -0.0051 | 1750.9480 | 584.6566 | 1750.9531 | 584.6583 | 3 | 36.41 |
| 38.05 | 55.4 | PIVHGSAYK                   | No ITRAQ4plex@N-term;<br>ITRAQ4plex(S)@6;<br>ITRAQ4plex(K)@9                     | cleaved T-P@N-term                                | -0.0105 | 1194.7224 | 598.3685 | 1194.7328 | 598.3737 | 2 | 34.11 |
| 38.05 | 55.4 | PQFYFR                      | ITRAQ4plex@N-term                                                                | cleaved R-P@N-term                                | 0.0236  | 1000.5489 | 501.2817 | 1000.5252 | 501.2699 | 2 | 40.48 |
| 38.05 | 55.4 | QVGVPYVIVFINK               | ITRAQ4plex@N-term;<br>ITRAQ4plex(K)@13                                           |                                                   | -0.0604 | 1762.9985 | 882.5065 | 1763.0589 | 882.5367 | 2 | 58.25 |
| 38.05 | 55.4 | QVGVPYVIVFINKADM<br>LAADER  | No ITRAQ4plex@N-term;<br>Oxidation(P)@5;<br>ITRAQ4plex(K)@13                     | missed K-A@13                                     | -0.0224 | 2607.3628 | 870.1282 | 2607.3852 | 870.1357 | 3 | 43.91 |
| 39.24 | 49.9 | RVIDKPLMPVEDVFS<br>ITGR     | Carbamylation@N-term;<br>ITRAQ4plex(K)@5                                         | missed R-V@1                                      | -0.0170 | 2505.3364 | 836.1194 | 2505.3535 | 836.1251 | 3 | 57.32 |
| 39.24 | 49.9 | TLAK                        | ITRAQ4plex@N-term;<br>ITRAQ4plex(K)@4                                            | cleaved T-T@N-term                                | 0.0116  | 719.4901  | 720.4974 | 719.4785  | 720.4858 | 1 | 58.63 |
| 38.05 | 55.4 | TTLTAAITTLAK                | ITRAQ4plex@N-term;<br>ITRAQ4plex(K)@13                                           |                                                   | -0.0122 | 1592.9470 | 797.4808 | 1592.9593 | 797.4869 | 2 | 39.15 |
| 39.24 | 49.9 | TVELISPIAMDK                | ITRAQ4plex@N-term;<br>Oxidation(P)@7;<br>ITRAQ4plex(K)@12                        | cleaved L-T@N-term                                | 0.0389  | 1619.9437 | 540.9885 | 1619.9048 | 540.9755 | 3 | 51.27 |
| 38.05 | 55.4 | TVVTGIEMFR                  | ITRAQ4plex@N-term                                                                |                                                   | -0.0491 | 1295.6539 | 648.8342 | 1295.7029 | 648.8587 | 2 | 32.70 |
| 39.24 | 49.9 | VEQGVLK                     | ITRAQ4plex@N-term;<br>ITRAQ4plex(K)@7                                            |                                                   | -2.0231 | 1057.6301 | 529.8223 | 1059.6532 | 530.8339 | 2 | 36.34 |
| 38.05 | 55.4 | VIDKPLMPVEDVFSIT<br>GR      | ITRAQ4plex@N-term;<br>ITRAQ4plex(K)@4                                            |                                                   | -0.0184 | 2450.3303 | 817.7841 | 2450.3487 | 817.7902 | 3 | 39.72 |
| 39.24 | 49.9 | VIVFINK                     | ITRAQ4plex@N-term;<br>ITRAQ4plex(K)@7                                            | cleaved Y-V@N-term                                | 0.0089  | 1119.7349 | 560.8747 | 1119.7259 | 560.8703 | 2 | 44.42 |
| 38.05 | 55.4 | VNDEVEIIGIRPTTK             | ITRAQ4plex@N-term;<br>ITRAQ4plex(K)@15                                           |                                                   | 0.0101  | 1971.1345 | 658.0521 | 1971.1244 | 658.0488 | 3 | 41.50 |

|          |       |      |                                       |                                                                                                                          |                                                            |         |           |           |           |           |   |       |
|----------|-------|------|---------------------------------------|--------------------------------------------------------------------------------------------------------------------------|------------------------------------------------------------|---------|-----------|-----------|-----------|-----------|---|-------|
|          | 38.05 | 55.4 | VTGIEMFR                              | ITRAQ4plex@N-term                                                                                                        | cleaved V-V@N-term                                         | -0.0015 | 1095.5853 | 548.7999  | 1095.5868 | 548.8007  | 2 | 31.40 |
|          | 38.05 | 55.4 | VVTGIEMFR                             | ITRAQ4plex@N-term                                                                                                        | cleaved T-V@N-term                                         | -0.0040 | 1194.6514 | 598.3329  | 1194.6553 | 598.3349  | 2 | 32.36 |
|          | 38.05 | 55.4 | YDQIDNAPEEK                           | ITRAQ4plex@N-term;<br>ITRAQ4plex(K)@11                                                                                   | cleaved A-Y@N-term                                         | -0.0145 | 1608.7731 | 805.3938  | 1608.7875 | 805.4010  | 2 | 27.72 |
|          | 39.24 | 49.9 | YRPOFYFR                              | ITRAQ4plex@N-term                                                                                                        | cleaved N-Y@N-term                                         | 0.0039  | 1319.6935 | 440.9051  | 1319.6897 | 440.9038  | 3 | 49.30 |
|          | 38.05 | 55.4 | YSFPGDTPPIVHGS<br>AVK                 | ITRAQ4plex@N-term;<br>ITRAQ4plex(K)@17                                                                                   |                                                            | -0.0199 | 2063.0732 | 688.6984  | 2063.0931 | 688.7050  | 3 | 32.11 |
| LIC12874 |       |      |                                       |                                                                                                                          |                                                            |         |           |           |           |           |   |       |
|          | 2     | 16.7 | LIDILDTNEDTVEALMK                     | ITRAQ4plex@N-term;<br>ITRAQ4plex(K)@17                                                                                   |                                                            | -0.0002 | 2220.1802 | 741.0673  | 2220.1803 | 741.0674  | 3 | 38.43 |
|          | 2     | 16.7 | LIDILDTNEDTVEALMK<br>LQLPAGVSVDIK     | ITRAQ4plex@N-term;<br>ITRAQ4plex(K)@17;<br>ITRAQ4plex(K)@29                                                              | missed K-L@17                                              | -0.0043 | 3584.9910 | 897.2550  | 3584.9952 | 897.2561  | 4 | 35.44 |
| LIC12873 |       |      |                                       |                                                                                                                          |                                                            |         |           |           |           |           |   |       |
|          | 6     | 21.4 | EFRS                                  | ITRAQ4plex@N-term                                                                                                        | cleaved S-F@C-term; missed R-S@3                           | 0.0572  | 681.4139  | 682.4212  | 681.3568  | 682.3641  | 1 | 55.75 |
|          | 6     | 21.4 | GPGA                                  | ITRAQ4plex@N-term                                                                                                        | cleaved G-G@N-term; cleaved A-H@C-term                     | 0.0391  | 444.2845  | 445.2918  | 444.2454  | 445.2527  | 1 | 35.45 |
|          | 6     | 21.4 | HGHAGGPGAHSRFR<br>HRHPGSMGANSTPS<br>R | ITRAQ4plex@N-term;<br>Deamidated(M)@21                                                                                   | missed R-F@13; missed R-H@16                               | -0.0264 | 3012.4282 | 1005.1500 | 3012.4546 | 1005.1588 | 3 | 52.80 |
|          | 6     | 21.4 | HPGSMGANSTPSR                         | ITRAQ4plex@N-term;<br>Deamidated(N)@8                                                                                    |                                                            | 0.0061  | 1442.6755 | 481.8991  | 1442.6694 | 481.8971  | 3 | 24.85 |
|          | 6     | 21.4 | HPGSMGANSTPSRVF<br>KGVKLPGRGTSQK      | ITRAQ4plex@N-term;<br>Deamidated(N)@8;<br>ITRAQ4plex(K)@16;<br>ITRAQ4plex(K)@19;<br>Oxidation(R)@23;<br>ITRAQ4plex(K)@28 | missed R-V@13; missed K-G@16; missed K-L@19; missed R-T@23 | -0.0134 | 3473.8879 | 869.4792  | 3473.9013 | 869.4826  | 4 | 26.15 |
|          | 6     | 21.4 | INEEKLLFVSGAVPG<br>TANTVITIE          | No ITRAQ4plex@N-term;<br>ITRAQ4plex(K)@5;<br>Oxidation(N)@6                                                              | cleaved E-K@C-term; missed K-N@5                           | -0.0035 | 2788.4944 | 930.5054  | 2788.4980 | 930.5066  | 3 | 44.93 |
|          | 6     | 21.4 | LPGR                                  | No ITRAQ4plex@N-term                                                                                                     |                                                            | -0.0113 | 441.2587  | 442.2660  | 441.2700  | 442.2772  | 1 | 60.44 |
|          | 6     | 21.4 | QLAFQDIK                              | ITRAQ4plex@N-term;<br>Deamidated(Q)@1;<br>ITRAQ4plex(K)@8                                                                | cleaved I-Q@N-term                                         | 0.0192  | 1250.7306 | 626.3726  | 1250.7114 | 626.3630  | 2 | 39.45 |
|          | 6     | 21.4 | SFGDSPTAGSVLK                         | ITRAQ4plex@N-term;<br>ITRAQ4plex(K)@13                                                                                   |                                                            | 0.0168  | 1552.8508 | 777.4327  | 1552.8341 | 777.4243  | 2 | 29.00 |
|          | 6     | 21.4 | SVENDGYEAIQLAFQD<br>IK                | ITRAQ4plex@N-term;<br>ITRAQ4plex(K)@18                                                                                   |                                                            | -0.0212 | 2327.1677 | 776.7299  | 2327.1889 | 776.7369  | 3 | 37.15 |
|          | 6     | 21.4 | TGVSK                                 | No ITRAQ4plex@N-term;<br>ITRAQ4plex(K)@5                                                                                 | cleaved V-T@N-term                                         | 0.0162  | 634.3934  | 635.4007  | 634.3772  | 635.3845  | 1 | 54.88 |
| LIC12872 |       |      |                                       |                                                                                                                          |                                                            |         |           |           |           |           |   |       |
|          | 6.62  | 20.4 | AENANLRSGNHATK<br>R                   | ITRAQ4plex@N-term;<br>ITRAQ4plex(K)@14                                                                                   | missed R-S@7; missed K-T@14                                | -0.0018 | 2027.0846 | 676.7021  | 2027.0864 | 676.7027  | 3 | 44.30 |
|          | 6.62  | 20.4 | AFDSIFK                               | ITRAQ4plex@N-term;<br>ITRAQ4plex(K)@7                                                                                    |                                                            | 0.0270  | 1114.6537 | 558.3341  | 1114.6266 | 558.3206  | 2 | 46.48 |
|          | 6.96  | 19.4 | APHWVGGGTVHGPO<br>K                   | Carbamyl@N-term;<br>ITRAQ4plex(K)@15                                                                                     |                                                            | -0.0297 | 1713.8525 | 572.2914  | 1713.8821 | 572.3013  | 3 | 41.23 |
|          | 6.62  | 20.4 | AVLSILGK                              | ITRAQ4plex@N-term;<br>ITRAQ4plex(K)@8                                                                                    |                                                            | 0.0075  | 1087.7284 | 544.8715  | 1087.7209 | 544.8677  | 2 | 42.34 |
|          | 6.96  | 19.4 | ENANLR                                | ITRAQ4plex@N-term;<br>Deamidated(N)@4                                                                                    | cleaved A-E@N-term                                         | 0.0181  | 860.4655  | 431.2400  | 860.4474  | 431.2310  | 2 | 39.08 |
|          | 6.62  | 20.4 | LISEIELPSALFESK                       | ITRAQ4plex@N-term;<br>ITRAQ4plex(K)@15                                                                                   |                                                            | 0.0029  | 1963.1151 | 655.3790  | 1963.1121 | 655.3780  | 3 | 37.34 |
|          | 6.62  | 20.4 | LSVASIYEAIK                           | ITRAQ4plex@N-term;<br>ITRAQ4plex(K)@11                                                                                   |                                                            | 0.0024  | 1480.8770 | 741.4457  | 1480.8745 | 741.4445  | 2 | 35.47 |
|          | 6.62  | 20.4 | NTGVIGLLVQGENDFL<br>K                 | ITRAQ4plex@N-term;<br>ITRAQ4plex(K)@17                                                                                   |                                                            | 0.0000  | 2104.1772 | 702.3997  | 2104.1772 | 702.3997  | 3 | 38.11 |
|          | 6.96  | 19.4 | YEAIKAEANL                            | ITRAQ4plex@N-term;<br>ITRAQ4plex(K)@5                                                                                    | cleaved I-Y@N-term; cleaved L-R@C-term;<br>missed K-A@5    | -0.0494 | 1522.7742 | 762.3943  | 1522.8235 | 762.4190  | 2 | 33.87 |
| LIC12871 |       |      |                                       |                                                                                                                          |                                                            |         |           |           |           |           |   |       |
|          | 4     | 26.0 | AIVFRDGSIDFAK                         | ITRAQ4plex@N-term;<br>Oxidation(F)@5;<br>Oxidation(F)@13;<br>ITRAQ4plex(K)@15                                            | missed R-D@6                                               | -0.0325 | 1930.0079 | 644.3433  | 1930.0404 | 644.3541  | 3 | 28.55 |
|          | 4     | 26.0 | DGASIDFAK                             | ITRAQ4plex@N-term;<br>ITRAQ4plex(K)@9                                                                                    |                                                            | -0.0967 | 1210.5471 | 606.2808  | 1210.6437 | 606.3291  | 2 | 35.82 |
|          | 4     | 26.0 | IDANK                                 | ITRAQ4plex@N-term;<br>ITRAQ4plex(K)@5                                                                                    | cleaved H-I@N-term                                         | 0.0038  | 847.5045  | 424.7595  | 847.5007  | 424.7576  | 2 | 23.41 |
|          | 4     | 26.0 | ILTP                                  | ITRAQ4plex@N-term                                                                                                        | cleaved V-I@N-term; cleaved P-I@C-term                     | -0.0291 | 586.3521  | 587.3594  | 586.3812  | 587.3885  | 1 | 54.24 |
|          | 4     | 26.0 | MNLQDVILTPIVTEK                       | ITRAQ4plex@N-term;<br>ITRAQ4plex(K)@15                                                                                   |                                                            | -0.0159 | 2001.1265 | 668.0494  | 2001.1424 | 668.0547  | 3 | 35.81 |

|          |       |      |                              |                                                                                                                                              |                                                                                                              |         |           |          |           |          |   |       |
|----------|-------|------|------------------------------|----------------------------------------------------------------------------------------------------------------------------------------------|--------------------------------------------------------------------------------------------------------------|---------|-----------|----------|-----------|----------|---|-------|
|          | 4     | 26.0 | NMPAARPHWK                   | ITRAQ4plex@N-term;<br>Deamidated(N)@1;<br>Deamidated(R)@6;<br>ITRAQ4plex(H)@8;<br>ITRAQ4plex(K)@10                                           |                                                                                                              | -0.0277 | 1640.8545 | 821.4345 | 1640.8822 | 821.4484 | 2 | 32.13 |
|          | 4     | 26.0 | QDVILTPIVTEK                 | ITRAQ4plex@N-term;<br>Phospho(T)@6;<br>ITRAQ4plex(K)@12                                                                                      | cleaved L-Q@N-term                                                                                           | 0.0316  | 1722.9728 | 575.3315 | 1722.9412 | 575.3210 | 3 | 32.24 |
|          | 4     | 26.0 | VTPSSVNVQVYR                 | ITRAQ4plex@N-term                                                                                                                            |                                                                                                              | 0.0077  | 1491.8245 | 746.9195 | 1491.8167 | 746.9156 | 2 | 29.10 |
| LIC12870 |       |      |                              |                                                                                                                                              |                                                                                                              |         |           |          |           |          |   |       |
|          | 12.41 | 32.6 | AGRGDGGK                     | ITRAQ4plex@N-term;<br>Deamidated(R)@3;<br>ITRAQ4plex(K)@8                                                                                    | missed R-G@3                                                                                                 | 0.0461  | 1005.5908 | 503.8027 | 1005.5447 | 503.7796 | 2 | 29.61 |
|          | 12.41 | 32.6 | AGRSRWLGK                    | ITRAQ4plex@N-term;<br>Deamidated(R)@3;<br>Oxidation(R)@5;<br>Oxidation(W)@6;<br>ITRAQ4plex(K)@9                                              | missed R-S@3; missed R-W@5                                                                                   | -0.0307 | 1350.7305 | 676.3725 | 1350.7612 | 676.3879 | 2 | 44.94 |
|          | 12.41 | 32.6 | DGEYLLK                      | ITRAQ4plex@N-term;<br>ITRAQ4plex(K)@8                                                                                                        |                                                                                                              | 0.0002  | 1237.7164 | 619.8655 | 1237.7162 | 619.8654 | 2 | 31.51 |
|          | 12.41 | 32.6 | DHNLVSIK                     | ITRAQ4plex@N-term;<br>Oxidation(H)@2;<br>Deamidated(N)@3;<br>ITRAQ4plex(K)@9                                                                 |                                                                                                              | 0.0154  | 1286.7228 | 644.3687 | 1286.7074 | 644.3610 | 2 | 38.28 |
|          | 10    | 24.0 | FIQK                         | ITRAQ4plex@N-term;<br>ITRAQ4plex(K)@5                                                                                                        |                                                                                                              | 0.0039  | 935.6087  | 468.8116 | 935.6048  | 468.8097 | 2 | 40.53 |
|          | 12.41 | 32.6 | FKPVTASR                     | ITRAQ4plex@N-term;<br>ITRAQ4plex(K)@2                                                                                                        |                                                                                                              | 0.0033  | 1279.7524 | 427.5914 | 1279.7492 | 427.5903 | 3 | 27.63 |
|          | 12.41 | 32.6 | GVVMNPVDHPHGGG<br>EGR        | ITRAQ4plex@N-term                                                                                                                            |                                                                                                              | -0.0267 | 1857.8760 | 620.2993 | 1857.9026 | 620.3081 | 3 | 30.28 |
|          | 12.41 | 32.6 | HPVSPWGQPTK                  | ITRAQ4plex@N-term;<br>ITRAQ4plex(K)@11                                                                                                       |                                                                                                              | 0.0024  | 1520.8367 | 507.9529 | 1520.8343 | 507.9521 | 3 | 44.08 |
|          | 12.41 | 32.6 | IDFK                         | ITRAQ4plex@N-term;<br>ITRAQ4plex(K)@4                                                                                                        | cleaved I-I@N-term                                                                                           | -0.0022 | 809.4869  | 405.7507 | 809.4891  | 405.7518 | 2 | 29.36 |
|          | 12.41 | 32.6 | IGNAMPIGK                    | ITRAQ4plex@N-term;<br>ITRAQ4plex(K)@9                                                                                                        |                                                                                                              | -0.0014 | 1187.6926 | 594.8536 | 1187.6940 | 594.8543 | 2 | 28.69 |
|          | 12.41 | 32.6 | IPPGTNVHNVELQIGK             | ITRAQ4plex@N-term;<br>ITRAQ4plex(K)@16                                                                                                       |                                                                                                              | -0.0286 | 2003.1121 | 668.7113 | 2003.1407 | 668.7209 | 3 | 31.34 |
|          | 12.41 | 32.6 | SVLDFAEITETEPYKPL<br>TLTLNFK | ITRAQ4plex@N-term;<br>ITRAQ4plex(K)@15;<br>ITRAQ4plex(K)@24                                                                                  |                                                                                                              | -0.0004 | 3216.7532 | 805.1956 | 3216.7535 | 805.1957 | 4 | 37.72 |
|          | 12.41 | 32.6 | TAGSFGTIAGR                  | No ITRAQ4plex@N-term                                                                                                                         |                                                                                                              | 0.0072  | 1036.5374 | 519.2759 | 1036.5302 | 519.2724 | 2 | 27.95 |
|          | 12.41 | 32.6 | TSGGRHPVSPWQGP<br>TK         | ITRAQ4plex@N-term;<br>Oxidation(P)@10;<br>Oxidation(P)@14;<br>ITRAQ4plex(K)@16                                                               | missed R-H@5                                                                                                 | -0.0462 | 2011.0017 | 671.3412 | 2011.0479 | 671.3566 | 3 | 44.38 |
|          | 10    | 24.0 | VGDTVQSGAG                   | ITRAQ4plex@N-term;<br>Deamidated(Q)@6                                                                                                        | cleaved G-S@C-term                                                                                           | 0.0592  | 1034.5594 | 518.2870 | 1034.5002 | 518.2574 | 2 | 43.46 |
|          | 12.41 | 32.6 | VGDTVQSGAGSEIK               | ITRAQ4plex@N-term;<br>ITRAQ4plex(K)@14                                                                                                       |                                                                                                              | 0.0058  | 1634.8778 | 818.4462 | 1634.8719 | 818.4432 | 2 | 27.45 |
|          | 12.41 | 32.6 | VGDTVQSGAGSEIKIG<br>NAMPIGKI | ITRAQ4plex@N-term;<br>Deamidated(Q)@6;<br>ITRAQ4plex(K)@14;<br>Oxidation(P)@20;<br>ITRAQ4plex(K)@23                                          | cleaved I-P@C-term; missed K-I@14;<br>missed K-I@23                                                          | -0.0371 | 2790.4792 | 931.1670 | 2790.5163 | 931.1794 | 3 | 49.55 |
| LIC12868 |       |      |                              |                                                                                                                                              |                                                                                                              |         |           |          |           |          |   |       |
|          | 4.13  | 19.1 | AARIR                        | No ITRAQ4plex@N-term;<br>Deamidated(R)@3                                                                                                     | missed R-I@3                                                                                                 | -0.0030 | 586.3521  | 587.3594 | 586.3551  | 587.3624 | 1 | 54.24 |
|          | 4.13  | 19.1 | AKAVSRFVRMSPRKV<br>RLVADEIR  | ITRAQ4plex@N-term;<br>ITRAQ4plex(K)@2;<br>Deamidated(R)@6;<br>Deamidated(R)@9;<br>Deamidated(R)@13;<br>ITRAQ4plex(K)@14;<br>Deamidated(R)@16 | cleaved E-A@N-term; missed K-A@2;<br>missed R-F@6; missed R-M@9; missed R-K@13; missed K-V@14; missed R-L@16 | 0.0469  | 3119.8435 | 520.9812 | 3119.7967 | 520.9734 | 6 | 53.59 |
|          | 2     | 8.2  | FRPRARGRAAR                  | ITRAQ4plex@N-term;<br>Deamidated(R)@8                                                                                                        | missed R-A@4; missed R-G@6; missed R-A@8                                                                     | 0.0441  | 1457.9004 | 486.9741 | 1457.8562 | 486.9593 | 3 | 43.07 |
|          | 4.13  | 19.1 | GYAVNEALDILK                 | ITRAQ4plex@N-term;<br>ITRAQ4plex(K)@12                                                                                                       |                                                                                                              | -0.0005 | 1592.9014 | 797.4579 | 1592.9017 | 797.4581 | 2 | 34.63 |
|          | 4.13  | 19.1 | ILKF                         | ITRAQ4plex@N-term;<br>ITRAQ4plex(K)@3                                                                                                        | cleaved D-I@N-term; cleaved F-T@C-term;<br>missed K-F@3                                                      | 0.0187  | 807.5649  | 404.7897 | 807.5462  | 404.7804 | 2 | 43.69 |
|          | 4.13  | 19.1 | IYDEGPIMK                    | ITRAQ4plex@N-term;<br>ITRAQ4plex(K)@10                                                                                                       |                                                                                                              | 0.0050  | 1451.7988 | 726.9067 | 1451.7938 | 726.9042 | 2 | 30.63 |
|          | 4.13  | 19.1 | LFIK                         | ITRAQ4plex@N-term;<br>ITRAQ4plex(K)@4                                                                                                        | cleaved Q-L@N-term                                                                                           | 0.0155  | 807.5617  | 404.7881 | 807.5462  | 404.7804 | 2 | 43.48 |

|          |      |      |                                   |                                                                                 |                                                                        |         |           |          |           |          |   |       |
|----------|------|------|-----------------------------------|---------------------------------------------------------------------------------|------------------------------------------------------------------------|---------|-----------|----------|-----------|----------|---|-------|
|          | 4.13 | 19.1 | MEAKAVSRFVR                       | ITRAQ4plex@N-term;<br>ITRAQ4plex(K)@4;<br>Oxidation(F)@9                        | missed K-A@4; missed R-F@8                                             | -0.1012 | 1596.8002 | 799.4073 | 1596.9014 | 799.4580 | 2 | 45.59 |
|          | 4.13 | 19.1 | VDFNQLFIK                         | ITRAQ4plex@N-term;<br>ITRAQ4plex(K)@9                                           |                                                                        | -0.0061 | 1410.8054 | 706.4100 | 1410.8115 | 706.4130 | 2 | 34.90 |
| LIC12867 |      |      |                                   |                                                                                 |                                                                        |         |           |          |           |          |   |       |
|          | 8.03 | 19.1 | EESEEDKYAVK                       | ITRAQ4plex@N-term;<br>ITRAQ4plex(K)@7;<br>ITRAQ4plex(K)@11                      | missed K-Y@7                                                           | -0.0400 | 1757.8649 | 586.9622 | 1757.9049 | 586.9756 | 3 | 28.26 |
|          | 8.03 | 19.1 | IDLGFK                            | ITRAQ4plex@N-term;<br>ITRAQ4plex(K)@6                                           |                                                                        | 0.0132  | 979.6078  | 490.8112 | 979.5946  | 490.8046 | 2 | 35.46 |
|          | 3.24 | 6.7  | IGLR                              | ITRAQ4plex@N-term                                                               | cleaved P-I@N-term                                                     | 0.0075  | 601.4109  | 602.4182 | 601.4033  | 602.4106 | 1 | 53.62 |
|          | 8.03 | 19.1 | ILISGRLNGADMARR                   | ITRAQ4plex@N-term;<br>Deamidated(R)@6;<br>Dethiomethyl(M)@12                    | missed R-L@6; missed R-R@14                                            | 0.1012  | 1739.0936 | 580.7051 | 1738.9924 | 580.6714 | 3 | 2.63  |
|          | 8.03 | 19.1 | INVNLHTAK                         | ITRAQ4plex@N-term;<br>ITRAQ4plex(K)@9                                           | cleaved K-P@C-term                                                     | 0.0121  | 1296.7878 | 433.2699 | 1296.7758 | 433.2659 | 3 | 29.54 |
|          | 3.24 | 6.7  | IPLHLTLR                          | ITRAQ4plex@N-term                                                               |                                                                        | -0.0096 | 992.6157  | 497.3151 | 992.6253  | 497.3199 | 2 | 40.96 |
|          | 8.03 | 19.1 | KFVQNR                            | ITRAQ4plex@N-term;<br>ITRAQ4plex(K)@1;<br>Deamidated(Q)@4                       | missed K-F@1                                                           | -0.0546 | 1079.5786 | 540.7966 | 1079.6331 | 540.8238 | 2 | 32.09 |
|          | 8.03 | 19.1 | LGFK                              | ITRAQ4plex@N-term;<br>ITRAQ4plex(K)@4                                           | cleaved D-L@N-term                                                     | 0.0153  | 751.4989  | 752.5062 | 751.4836  | 752.4909 | 1 | 56.22 |
|          | 8.03 | 19.1 | NLHEDIK                           | ITRAQ4plex@N-term;<br>ITRAQ4plex(K)@7                                           |                                                                        | -0.0048 | 1155.6443 | 578.8294 | 1155.6492 | 578.8319 | 2 | 31.14 |
|          | 8.03 | 19.1 | PGVIGQK                           | ITRAQ4plex@N-term;<br>ITRAQ4plex(K)@8                                           | cleaved K-P@N-term                                                     | -0.0041 | 1098.6964 | 550.3555 | 1098.7005 | 550.3575 | 2 | 29.19 |
|          | 8.03 | 19.1 | QELRRAMRGVGEIKI<br>LISGRLNGADMARR | ITRAQ4plex@N-term;<br>Deamidated(R)@8;<br>ITRAQ4plex(K)@15;<br>Deamidated(N)@23 | missed R-R@4; missed R-A@5; missed R-G@8; missed K-I@15; missed R-L@21 | -0.0516 | 3456.8499 | 865.2197 | 3456.9013 | 865.2326 | 4 | 53.75 |
|          | 8.03 | 19.1 | QKVNPIGLRIGITR                    | Gln->pyro-Glu@N-term;<br>ITRAQ4plex(K)@2;<br>Oxidation(N)@4; Oxidation(P)@5     | cleaved G-Q@N-term; missed K-V@2;<br>missed R-I@9                      | -0.0352 | 1722.9874 | 575.3364 | 1723.0226 | 575.3482 | 3 | 44.03 |
|          | 8.03 | 19.1 | TMTDKPVLNIIIEVK                   | ITRAQ4plex@N-term;<br>ITRAQ4plex(K)@5;<br>ITRAQ4plex(K)@15                      |                                                                        | -0.0273 | 2146.2124 | 716.4114 | 2146.2397 | 716.4205 | 3 | 32.89 |
|          | 3.24 | 6.7  | TTFGQIGVK                         | ITRAQ4plex@N-term;<br>ITRAQ4plex(K)@9                                           |                                                                        | -0.0034 | 1237.7240 | 619.8693 | 1237.7274 | 619.8710 | 2 | 40.45 |
|          | 3.24 | 6.7  | VNPIGLR                           | ITRAQ4plex@N-term                                                               |                                                                        | -0.0026 | 911.5649  | 456.7897 | 911.5674  | 456.7910 | 2 | 39.55 |
|          | 3.24 | 6.7  | VWVYSGDFIQSK                      | ITRAQ4plex@N-term;<br>Oxidation(F)@8;<br>ITRAQ4plex(K)@12                       |                                                                        | -0.0193 | 1733.8676 | 578.9631 | 1733.8868 | 578.9695 | 3 | 41.40 |
| LIC12866 |      |      |                                   |                                                                                 |                                                                        |         |           |          |           |          |   |       |
|          | 6.14 | 23.4 | ALSLASYK                          | ITRAQ4plex@N-term;<br>ITRAQ4plex(K)@8                                           |                                                                        | -0.0043 | 1139.6750 | 570.8448 | 1139.6794 | 570.8470 | 2 | 41.62 |
|          | 4    | 16.8 | GNPEFWIAEIRPGR                    | ITRAQ4plex@N-term                                                               |                                                                        | 0.0044  | 1784.9487 | 595.9902 | 1784.9444 | 595.9887 | 3 | 34.91 |
|          | 6.14 | 23.4 | GSSVSFGFGL                        | No ITRAQ4plex@N-term;<br>Methyl(L)@11                                           | cleaved L-K@C-term                                                     | 0.0554  | 1099.5741 | 550.7943 | 1099.5186 | 550.7666 | 2 | 44.36 |
|          | 6.14 | 23.4 | IFPHTPTK                          | ITRAQ4plex@N-term;<br>ITRAQ4plex(K)@9                                           |                                                                        | -0.0020 | 1340.8040 | 447.9419 | 1340.8060 | 447.9426 | 3 | 43.86 |
|          | 4    | 16.8 | LPIHTEFVK                         | ITRAQ4plex@N-term;<br>ITRAQ4plex(K)@9                                           |                                                                        | -0.0069 | 1370.8097 | 457.9438 | 1370.8166 | 457.9461 | 3 | 31.57 |
|          | 4    | 16.8 | QIEAARITINR                       | ITRAQ4plex@N-term                                                               | missed R-I@6                                                           | -0.0016 | 1427.8315 | 714.9230 | 1427.8330 | 714.9238 | 2 | 52.64 |
| LIC12865 |      |      |                                   |                                                                                 |                                                                        |         |           |          |           |          |   |       |
|          | 2    | 12.8 | DSEILEQLEEAR                      | ITRAQ4plex@N-term                                                               |                                                                        | -0.0011 | 1574.7899 | 788.4022 | 1574.7910 | 788.4028 | 2 | 33.11 |
|          | 2    | 12.8 | LENPK                             | ITRAQ4plex@N-term;<br>ITRAQ4plex(K)@5                                           | cleaved S-L@N-term                                                     | -0.0047 | 887.5273  | 444.7709 | 887.5320  | 444.7733 | 2 | 24.69 |
| LIC12864 |      |      |                                   |                                                                                 |                                                                        |         |           |          |           |          |   |       |
|          | 5.22 | 21.3 | ILAIETRPLSK                       | ITRAQ4plex@N-term;<br>ITRAQ4plex(K)@11                                          |                                                                        | 0.0021  | 1527.9613 | 510.3277 | 1527.9592 | 510.3270 | 3 | 31.66 |
|          | 5.22 | 21.3 | NSMNK                             | ITRAQ4plex@N-term;<br>ITRAQ4plex(K)@5                                           | cleaved S-N@N-term                                                     | 0.0386  | 880.5066  | 441.2606 | 880.4680  | 441.2413 | 2 | 25.22 |
|          | 5.22 | 21.3 | TVVILVETR                         | ITRAQ4plex@N-term                                                               |                                                                        | 1.0098  | 1173.7349 | 587.8747 | 1172.7251 | 587.3698 | 2 | 56.43 |
|          | 5.22 | 21.3 | VVSNSMNK                          | ITRAQ4plex@N-term;<br>ITRAQ4plex(K)@8                                           |                                                                        | -0.0193 | 1165.6176 | 583.8160 | 1165.6369 | 583.8257 | 2 | 25.60 |
| LIC12862 |      |      |                                   |                                                                                 |                                                                        |         |           |          |           |          |   |       |
|          | 1.73 | 7.6  | VGFEVTK                           | ITRAQ4plex@N-term;<br>ITRAQ4plex(K)@7                                           |                                                                        | -0.0047 | 1066.6219 | 534.3182 | 1066.6266 | 534.3206 | 2 | 39.19 |
|          | 1.73 | 7.6  | VIVEGLNKR                         | ITRAQ4plex@N-term;<br>ITRAQ4plex(K)@8                                           | missed K-R@8                                                           | 0.0195  | 1314.8423 | 439.2880 | 1314.8227 | 439.2815 | 3 | 41.93 |
| LIC12861 |      |      |                                   |                                                                                 |                                                                        |         |           |          |           |          |   |       |
|          | 8.75 | 18.7 | AARLR                             | No ITRAQ4plex@N-term;<br>Deamidated(R)@3                                        | cleaved M-A@N-term; missed R-L@3                                       | -0.0030 | 586.3521  | 587.3594 | 586.3551  | 587.3624 | 1 | 54.24 |
|          | 8.75 | 18.7 | ALEAAVEELALITGQR<br>PVK           | ITRAQ4plex@N-term;<br>ITRAQ4plex(K)@19                                          |                                                                        | -0.0126 | 2295.3279 | 766.1166 | 2295.3406 | 766.1208 | 3 | 41.63 |



|          |      |      |                              |                                                                                                                     |                                           |         |           |           |           |           |   |       |
|----------|------|------|------------------------------|---------------------------------------------------------------------------------------------------------------------|-------------------------------------------|---------|-----------|-----------|-----------|-----------|---|-------|
|          | 8.75 | 18.7 | EIVP                         | No iTRAQ4plex@N-term                                                                                                | cleaved P-E@C-term                        | 0.0100  | 456.2684  | 457.2757  | 456.2584  | 457.2657  | 1 | 56.32 |
|          | 8.75 | 18.7 | EIVPELNKK                    | iTRAQ4plex@N-term;<br>iTRAQ4plex(K)@8;<br>iTRAQ4plex(K)@9                                                           | missed K-K@8                              | -0.0120 | 1500.9121 | 501.3113  | 1500.9241 | 501.3153  | 3 | 30.90 |
|          | 8.75 | 18.7 | EQUIFPEIK                    | iTRAQ4plex@N-term;<br>iTRAQ4plex(K)@9                                                                               |                                           | 0.0085  | 1403.8353 | 702.9249  | 1403.8268 | 702.9207  | 2 | 32.50 |
|          | 8.75 | 18.7 | FSSIMQVPR                    | No iTRAQ4plex@N-term                                                                                                |                                           | 0.0120  | 1063.5605 | 532.7875  | 1063.5485 | 532.7815  | 2 | 32.68 |
|          | 8.75 | 18.7 | IVLNVGMGEAHTNPK              | iTRAQ4plex@N-term;<br>iTRAQ4plex(K)@15                                                                              |                                           | -0.0085 | 1867.0144 | 623.3454  | 1867.0229 | 623.3483  | 3 | 31.61 |
|          | 8.75 | 18.7 | LVNVALPR                     | iTRAQ4plex@N-term                                                                                                   |                                           | 0.0074  | 1024.6589 | 513.3367  | 1024.6515 | 513.3330  | 2 | 30.80 |
|          | 8.75 | 18.7 | NVGMGEAHTNPK                 | iTRAQ4plex@N-term;<br>iTRAQ4plex(K)@12                                                                              | cleaved L-N@N-term                        | -0.0052 | 1541.7811 | 514.9343  | 1541.7864 | 514.9361  | 3 | 25.94 |
|          | 6.03 | 23.6 | SIAGFK                       | iTRAQ4plex@N-term;<br>iTRAQ4plex(K)@6                                                                               |                                           | -0.0042 | 909.5486  | 455.7816  | 909.5527  | 455.7836  | 2 | 39.25 |
| LIC12859 |      |      |                              |                                                                                                                     |                                           |         |           |           |           |           |   |       |
|          | 4.34 | 16.5 | ELVR                         | Glu->pyro-Glu@N-term                                                                                                |                                           | 0.0034  | 497.2996  | 498.3068  | 497.2962  | 498.3035  | 1 | 56.15 |
|          | 4.34 | 16.5 | SAEIRPYK                     | iTRAQ4plex@N-term;<br>iTRAQ4plex(K)@8                                                                               |                                           | -0.0092 | 1250.7135 | 417.9118  | 1250.7227 | 417.9148  | 3 | 28.14 |
|          | 4.34 | 16.5 | SILDLMK                      | iTRAQ4plex@N-term;<br>iTRAQ4plex(K)@7                                                                               |                                           | 0.0199  | 1106.6812 | 554.3478  | 1106.6613 | 554.3379  | 2 | 47.80 |
|          | 4.34 | 16.5 | SILDLMKEEGFIK                | iTRAQ4plex@N-term;<br>iTRAQ4plex(K)@7;<br>iTRAQ4plex(K)@13                                                          |                                           | 0.0098  | 1954.1273 | 652.3831  | 1954.1175 | 652.3798  | 3 | 39.83 |
|          | 4.34 | 16.5 | VNETFEDYK                    | iTRAQ4plex@N-term;<br>iTRAQ4plex(K)@9                                                                               |                                           | -0.0106 | 1431.7020 | 716.8583  | 1431.7125 | 716.8635  | 2 | 29.73 |
|          | 4.34 | 16.5 | VSTSK                        | No iTRAQ4plex@N-term;<br>iTRAQ4plex(K)@5                                                                            | cleaved I-V@N-term                        | 0.0209  | 664.4087  | 665.4160  | 664.3877  | 665.3950  | 1 | 58.04 |
| LIC12858 |      |      |                              |                                                                                                                     |                                           |         |           |           |           |           |   |       |
|          | 3.94 | 9.5  | GPLGELFTPIFEGISVK            | iTRAQ4plex@N-term;<br>iTRAQ4plex(K)@17                                                                              |                                           | 0.0108  | 2091.1965 | 1046.6060 | 2091.1860 | 1046.6003 | 2 | 1.85  |
|          | 3.94 | 9.5  | GPLGELFTPIFEGISVK<br>TENGIVK | iTRAQ4plex@N-term;<br>Oxidation(P)@2; Oxidation(P)@9;<br>iTRAQ4plex(K)@17;<br>Deamidated(N)@20;<br>iTRAQ4plex(K)@24 | missed K-T@17                             | -0.0036 | 3009.6604 | 502.6173  | 3009.6640 | 502.6179  | 6 | 60.03 |
|          | 3.94 | 9.5  | GVSQGWK                      | iTRAQ4plex@N-term;<br>iTRAQ4plex(K)@8                                                                               |                                           | -0.9845 | 1176.6490 | 589.3318  | 1177.6335 | 589.8240  | 2 | 27.68 |
|          | 3.94 | 9.5  | IDVQEQLK                     | iTRAQ4plex@N-term;<br>iTRAQ4plex(K)@8                                                                               |                                           | -0.0176 | 1259.7153 | 630.8649  | 1259.7329 | 630.8737  | 2 | 28.79 |
|          | 4.29 | 14.5 | IRSK                         | No iTRAQ4plex@N-term;<br>iTRAQ4plex(K)@4                                                                            | cleaved D-I@N-term; missed R-S@2          | 0.0113  | 646.4361  | 647.4434  | 646.4248  | 647.4321  | 1 | 59.43 |
|          | 3.94 | 9.5  | LPDKVEVK                     | iTRAQ4plex@N-term;<br>iTRAQ4plex(K)@4;<br>iTRAQ4plex(K)@8                                                           | missed K-V@4                              | -0.0639 | 1358.7860 | 453.9359  | 1358.8499 | 453.9572  | 3 | 30.55 |
|          | 3.94 | 9.5  | RIGK                         | No iTRAQ4plex@N-term;<br>iTRAQ4plex(K)@4                                                                            | cleaved S-R@N-term; missed R-I@1          | 0.0452  | 616.4594  | 617.4667  | 616.4142  | 617.4215  | 1 | 55.94 |
|          | 3.94 | 9.5  | VVALHGLTR                    | iTRAQ4plex@N-term                                                                                                   |                                           | -0.0189 | 1108.6649 | 555.3397  | 1108.6839 | 555.3492  | 2 | 59.93 |
| LIC12857 |      |      |                              |                                                                                                                     |                                           |         |           |           |           |           |   |       |
|          | 2.28 | 7.4  | EAGL                         | iTRAQ4plex@N-term                                                                                                   | cleaved L-E@C-term                        | -0.0076 | 532.2902  | 533.2975  | 532.2979  | 533.3051  | 1 | 49.25 |
|          | 2.28 | 7.4  | IAAFAEGAR                    | iTRAQ4plex@N-term                                                                                                   |                                           | 0.0259  | 1048.6046 | 525.3096  | 1048.5787 | 525.2966  | 2 | 40.43 |
|          | 2.28 | 7.4  | SGMIFHGR                     | iTRAQ4plex@N-term                                                                                                   |                                           | 0.0070  | 1047.5476 | 524.7811  | 1047.5406 | 524.7776  | 2 | 40.33 |
| LIC12854 |      |      |                              |                                                                                                                     |                                           |         |           |           |           |           |   |       |
|          | 4.09 | 11.7 | AIHVIADGF                    | iTRAQ4plex@N-term                                                                                                   | cleaved F-S@C-term                        | -0.0721 | 1085.5271 | 543.7708  | 1085.5991 | 543.8068  | 2 | 39.11 |
|          | 8    | 24.4 | AIHVIADGFSQSAK               | iTRAQ4plex@N-term;<br>iTRAQ4plex(K)@14                                                                              |                                           | -0.0142 | 1730.9418 | 577.9879  | 1730.9559 | 577.9926  | 3 | 31.43 |
|          | 8    | 24.4 | GFEGGQMPIHR                  | iTRAQ4plex@N-term                                                                                                   |                                           | 0.0005  | 1371.6844 | 458.2354  | 1371.6839 | 458.2353  | 3 | 29.59 |
|          | 8    | 24.4 | GQYARNTVRRGFEG<br>GOMPPIHR   | iTRAQ4plex@N-term;<br>Oxidation(Y)@3;<br>Oxidation(F)@12;<br>Deamidated(Q)@16                                       | missed R-N@5; missed R-R@9; missed R-G@10 | -0.0393 | 2606.2612 | 869.7610  | 2606.3006 | 869.7741  | 3 | 47.08 |
|          | 8    | 24.4 | GSIK                         | No iTRAQ4plex@N-term;<br>iTRAQ4plex(K)@4                                                                            | cleaved G-G@N-term                        | -0.0392 | 547.3060  | 548.3133  | 547.3451  | 548.3524  | 1 | 38.83 |
|          | 8    | 24.4 | ILDKETTLFK                   | iTRAQ4plex@N-term;<br>iTRAQ4plex(K)@4;<br>iTRAQ4plex(K)@10                                                          |                                           | -0.0022 | 1638.9900 | 547.3373  | 1638.9922 | 547.3380  | 3 | 34.28 |
|          | 8    | 24.4 | LEQASAFGK                    | iTRAQ4plex@N-term;<br>iTRAQ4plex(K)@9                                                                               |                                           | -0.0136 | 1237.6774 | 619.8459  | 1237.6910 | 619.8528  | 2 | 28.85 |
|          | 8    | 24.4 | LTGN                         | No iTRAQ4plex@N-term                                                                                                | cleaved G-L@N-term; cleaved N-I@C-term    | 0.0052  | 403.2119  | 404.2191  | 403.2067  | 404.2140  | 1 | 46.98 |
|          | 4.09 | 11.7 | RGFEGGQMPIHR                 | Carbonyl@N-term;<br>Oxidation(M)@8                                                                                  | missed R-G@1                              | -0.0049 | 1442.6788 | 481.9002  | 1442.6837 | 481.9018  | 3 | 35.59 |
|          | 4.09 | 11.7 | SGLTGNIDAK                   | iTRAQ4plex@N-term;<br>iTRAQ4plex(K)@10                                                                              |                                           | -0.0005 | 1262.7069 | 632.3607  | 1262.7074 | 632.3610  | 2 | 36.72 |
|          | 4.09 | 11.7 | TGEIK                        | No iTRAQ4plex@N-term;<br>iTRAQ4plex(K)@5                                                                            | cleaved G-T@N-term                        | 0.0106  | 690.4139  | 691.4212  | 690.4034  | 691.4107  | 1 | 57.98 |

|          |       |      |                                  |                                                                                                                          |                                                                                                               |         |           |           |           |           |   |       |
|----------|-------|------|----------------------------------|--------------------------------------------------------------------------------------------------------------------------|---------------------------------------------------------------------------------------------------------------|---------|-----------|-----------|-----------|-----------|---|-------|
|          | 4.09  | 11.7 | VNLR                             | ITRAQ4plex@N-term;<br>Oxidation(N)@2                                                                                     | cleaved P-V@N-term                                                                                            | 0.0326  | 660.4366  | 661.4439  | 660.4041  | 661.4113  | 1 | 59.58 |
| LIC12852 |       |      |                                  |                                                                                                                          |                                                                                                               |         |           |           |           |           |   |       |
|          | 2.32  | 5.9  | AINLQVPAELLKR                    | ITRAQ4plex@N-term;<br>Deamidated(Q)@5;<br>ITRAQ4plex(K)@13                                                               | missed K-R@13                                                                                                 | -0.0232 | 1868.0743 | 623.6987  | 1868.0975 | 623.7064  | 3 | 46.96 |
|          | 2.32  | 5.9  | IGIIK                            | ITRAQ4plex@N-term;<br>ITRAQ4plex(K)@5                                                                                    | cleaved V-I@N-term                                                                                            | 0.0086  | 830.5919  | 416.3032  | 830.5833  | 416.2989  | 2 | 39.82 |
|          | 2.32  | 5.9  | LLGRAEIEGR                       | ITRAQ4plex@N-term                                                                                                        | missed R-A@4                                                                                                  | 0.0442  | 1256.7765 | 629.3955  | 1256.7323 | 629.3734  | 2 | 51.60 |
|          | 2.32  | 5.9  | TLPLLDIFYATR                     | ITRAQ4plex@N-term                                                                                                        |                                                                                                               | -0.0008 | 1452.8091 | 727.4118  | 1452.8099 | 727.4122  | 2 | 49.57 |
|          | 2.32  | 5.9  | VIGIIK                           | ITRAQ4plex@N-term;<br>ITRAQ4plex(K)@6                                                                                    | cleaved V-V@N-term                                                                                            | -0.0013 | 929.6504  | 465.8325  | 929.6517  | 465.8331  | 2 | 42.10 |
| LIC12849 |       |      |                                  |                                                                                                                          |                                                                                                               |         |           |           |           |           |   |       |
|          | 4.76  | 10.4 | ARIAGIDLPR                       | ITRAQ4plex@N-term;<br>Deamidated(R)@2;<br>Deamidated(R)@10                                                               | cleaved M-A@N-term; missed R-I@2                                                                              | -0.0804 | 1226.6301 | 614.3223  | 1226.7105 | 614.3625  | 2 | 42.17 |
|          | 4.76  | 10.4 | DLNESQEAIR                       | ITRAQ4plex@N-term;<br>Deamidated(N)@3                                                                                    |                                                                                                               | 0.0079  | 1389.6937 | 695.8541  | 1389.6858 | 695.8502  | 2 | 27.17 |
|          | 4.76  | 10.4 | IAGIDLPR                         | ITRAQ4plex@N-term                                                                                                        |                                                                                                               | 0.0028  | 997.6071  | 499.8108  | 997.6042  | 499.8094  | 2 | 30.84 |
|          | 4.76  | 10.4 | SEIQLNIK                         | ITRAQ4plex@N-term;<br>ITRAQ4plex(K)@8                                                                                    |                                                                                                               | 0.0001  | 1231.7382 | 616.8763  | 1231.7380 | 616.8763  | 2 | 39.65 |
|          | 4.76  | 10.4 | SEIQLNIKRLMDIGCYR<br>GLRHRRLP    | ITRAQ4plex@N-term;<br>ITRAQ4plex(K)@8;<br>Methylthio(C)@15;<br>Oxidation(H)@21;<br>Deamidated(R)@22;<br>Deamidated(R)@23 | cleaved P-V@C-term; missed K-R@8;<br>missed R-L@9; missed R-G@17; missed R-H@20; missed R-R@22; missed R-G@23 | 0.1002  | 3445.9468 | 575.3317  | 3445.8465 | 575.3150  | 6 | 53.13 |
|          | 4.76  | 10.4 | TRKGGK                           | ITRAQ4plex@N-term;<br>ITRAQ4plex(K)@3;<br>ITRAQ4plex(K)@6                                                                | missed R-K@2; missed K-G@3                                                                                    | -0.0151 | 1077.6833 | 539.8489  | 1077.6984 | 539.8565  | 2 | 40.56 |
|          | 4.76  | 10.4 | VKDLNESQEAIR                     | ITRAQ4plex@N-term;<br>ITRAQ4plex(K)@2                                                                                    |                                                                                                               | -0.0181 | 1759.9491 | 587.6570  | 1759.9672 | 587.6630  | 3 | 28.90 |
|          | 4.76  | 10.4 | YRGLR                            | No ITRAQ4plex@N-term;<br>Deamidated(R)@2                                                                                 | cleaved C-Y@N-term; missed R-G@2                                                                              | 0.0430  | 664.4087  | 665.4160  | 664.3657  | 665.3729  | 1 | 58.04 |
| LIC12848 |       |      |                                  |                                                                                                                          |                                                                                                               |         |           |           |           |           |   |       |
|          | 2.85  | 15.4 | AMDSAGLQEVDMVMS<br>GPGIGR        | ITRAQ4plex@N-term                                                                                                        |                                                                                                               | -0.0574 | 2232.0427 | 745.0215  | 2232.1000 | 745.0406  | 3 | 57.98 |
|          | 2.85  | 15.4 | STPYAAQIAAGNAAEK                 | ITRAQ4plex@N-term;<br>ITRAQ4plex(K)@16                                                                                   |                                                                                                               | -0.1185 | 1849.8593 | 925.9369  | 1849.9778 | 925.9962  | 2 | 28.34 |
| LIC12847 |       |      |                                  |                                                                                                                          |                                                                                                               |         |           |           |           |           |   |       |
|          | 4.28  | 4.3  | AYGELLEK                         | ITRAQ4plex@N-term;<br>ITRAQ4plex(K)@7                                                                                    |                                                                                                               | -0.0010 | 1080.6412 | 541.3279  | 1080.6423 | 541.3284  | 2 | 40.99 |
|          | 3.46  | 4.8  | EGVDLFLK                         | ITRAQ4plex@N-term;<br>ITRAQ4plex(K)@8                                                                                    |                                                                                                               | -0.0172 | 1207.6885 | 604.8515  | 1207.7056 | 604.8601  | 2 | 37.34 |
|          | 3.46  | 4.8  | EQUIVELYSK                       | ITRAQ4plex@N-term;<br>ITRAQ4plex(K)@10                                                                                   |                                                                                                               | 0.0021  | 1494.8558 | 748.4352  | 1494.8537 | 748.4341  | 2 | 49.43 |
|          | 3.46  | 4.8  | LFK                              | ITRAQ4plex@N-term;<br>ITRAQ4plex(K)@4                                                                                    | cleaved D-L@N-term                                                                                            | 0.0155  | 807.5617  | 404.7881  | 807.5462  | 404.7804  | 2 | 43.48 |
|          | 4.28  | 4.3  | LGFAITR                          | ITRAQ4plex@N-term                                                                                                        |                                                                                                               | -0.0001 | 920.5565  | 461.2855  | 920.5565  | 461.2855  | 2 | 42.47 |
|          | 3.46  | 4.8  | LGFAITRRQAR                      | ITRAQ4plex@N-term;<br>Oxidation(R)@7                                                                                     | missed R-R@7; missed R-Q@8                                                                                    | -0.0267 | 1447.8226 | 483.6148  | 1447.8494 | 483.6237  | 3 | 41.73 |
|          | 4.28  | 4.3  | LLERRLDNVVYR                     | ITRAQ4plex@N-term;<br>Oxidation(N)@8                                                                                     | cleaved Q-L@N-term; missed R-R@4;<br>missed R-L@5                                                             | -0.0051 | 1704.9706 | 569.3308  | 1704.9757 | 569.3325  | 3 | 45.37 |
|          | 3.46  | 4.8  | LSQSLQGIPSWLSAD<br>YTNFGGDVTLPER | ITRAQ4plex@N-term                                                                                                        |                                                                                                               | 3.0108  | 3268.6484 | 1090.5570 | 3265.6377 | 1089.5532 | 3 | 39.55 |
|          | 4.28  | 4.3  | QARNFIAHRHILVNGE<br>R            | Gln->pyro-Glu@N-term;<br>ITRAQ4plex(H)@8                                                                                 | missed R-N@3; missed R-H@9                                                                                    | 0.0506  | 2157.2295 | 720.0838  | 2157.1790 | 720.0669  | 3 | 49.04 |
|          | 4.28  | 4.3  | RLDNVVYR                         | Carbamyl@N-term                                                                                                          | missed R-L@1                                                                                                  | 0.0013  | 1076.5740 | 539.2943  | 1076.5727 | 539.2936  | 2 | 38.82 |
|          | 3.46  | 4.8  | SSYTFNK                          | ITRAQ4plex@N-term;<br>ITRAQ4plex(K)@7                                                                                    |                                                                                                               | 0.0064  | 1133.6025 | 567.8085  | 1133.5961 | 567.8053  | 2 | 28.35 |
|          | 3.46  | 4.8  | VDIP                             | ITRAQ4plex@N-term                                                                                                        | cleaved P-S@C-term                                                                                            | 0.0104  | 586.3553  | 587.3625  | 586.3448  | 587.3521  | 1 | 53.86 |
|          | 3.46  | 4.8  | VDIPSYR                          | ITRAQ4plex@N-term                                                                                                        |                                                                                                               | 0.0005  | 992.5418  | 497.2782  | 992.5413  | 497.2779  | 2 | 29.94 |
|          | 3.46  | 4.8  | VDIPSYRLNVGDK                    | ITRAQ4plex@N-term;<br>ITRAQ4plex(K)@13                                                                                   | missed R-L@7                                                                                                  | 1.9717  | 1764.9539 | 883.4842  | 1762.9821 | 882.4983  | 2 | 35.69 |
|          | 4.28  | 4.3  | VSEYGAQLR                        | ITRAQ4plex@N-term                                                                                                        |                                                                                                               | -0.0088 | 1165.6125 | 583.8135  | 1165.6213 | 583.8179  | 2 | 37.83 |
| LIC12846 |       |      |                                  |                                                                                                                          |                                                                                                               |         |           |           |           |           |   |       |
|          | 13.95 | 22.8 | DIEVLGTIPVDSIFSPV<br>QK          | ITRAQ4plex@N-term;<br>ITRAQ4plex(K)@19                                                                                   |                                                                                                               | 0.0295  | 2344.3428 | 782.4549  | 2344.3133 | 782.4451  | 3 | 50.35 |
|          | 13.95 | 22.8 | EDAN                             | Glu->pyro-Glu@N-term                                                                                                     | cleaved N-E@N-term; cleaved N-L@C-term                                                                        | 0.1861  | 429.3357  | 430.3430  | 429.1496  | 430.1569  | 1 | 58.43 |
|          | 13.95 | 22.8 | FVAEPFER                         | ITRAQ4plex@N-term                                                                                                        |                                                                                                               | -0.0030 | 1137.5911 | 569.8028  | 1137.5940 | 569.8043  | 2 | 41.91 |
|          | 13.95 | 22.8 | GFATTIGNSLR                      | ITRAQ4plex@N-term;<br>Deamidated(N)@8                                                                                    |                                                                                                               | -0.0350 | 1280.6497 | 641.3321  | 1280.6846 | 641.3496  | 2 | 40.93 |
|          | 13.95 | 22.8 | GYVPAEEK                         | Carbamyl@N-term;<br>ITRAQ4plex(Y)@2;<br>ITRAQ4plex(K)@8                                                                  |                                                                                                               | 0.0052  | 1222.6489 | 612.3317  | 1222.6437 | 612.3291  | 2 | 35.90 |

|          |       |      |                                             |                                                                                          |                                           |         |           |           |           |           |   |       |
|----------|-------|------|---------------------------------------------|------------------------------------------------------------------------------------------|-------------------------------------------|---------|-----------|-----------|-----------|-----------|---|-------|
|          | 13.95 | 22.8 | HVEELELSVR                                  | Carbamyl@N-term                                                                          |                                           | 0.0208  | 1252.6620 | 627.3383  | 1252.6412 | 627.3279  | 2 | 50.37 |
|          | 13.95 | 22.8 | IEGVNHEFSFIEGVAE DVTR                       | Carbamyl@N-term                                                                          |                                           | 0.0117  | 2290.0981 | 1146.0560 | 2290.0866 | 1146.0506 | 2 | 52.14 |
|          | 13.95 | 22.8 | IHLLELK                                     | ITRAQ4plex@N-term; ITRAQ4plex(K)@7                                                       |                                           | -0.0016 | 1152.7458 | 577.3802  | 1152.7474 | 577.3810  | 2 | 49.93 |
|          | 13.95 | 22.8 | IILNLK                                      | ITRAQ4plex@N-term; ITRAQ4plex(K)@6                                                       |                                           | 0.0038  | 1000.6927 | 501.3536  | 1000.6888 | 501.3517  | 2 | 44.25 |
|          | 13.95 | 22.8 | KIEFN                                       | ITRAQ4plex@N-term; ITRAQ4plex(K)@1                                                       | cleaved N-T@C-term; missed K-I@1          | 0.0078  | 937.5555  | 469.7850  | 937.5477  | 469.7811  | 2 | 39.26 |
|          | 13.95 | 22.8 | LSTLGLSFGMR                                 | ITRAQ4plex@N-term                                                                        |                                           | 0.0135  | 1324.7430 | 663.3788  | 1324.7295 | 663.3720  | 2 | 53.00 |
|          | 13.95 | 22.8 | NVLR                                        | ITRAQ4plex@N-term; Oxidation(N)@1                                                        | cleaved L-N@N-term                        | 0.0326  | 660.4366  | 661.4439  | 660.4041  | 661.4113  | 1 | 59.58 |
|          | 13.95 | 22.8 | SSIEGAAISAIRIEGVN HEFSFIEGVAE DVTR          | ITRAQ4plex@N-term                                                                        | cleaved M-S@N-term; missed R-I@12         | -3.6284 | 3543.1792 | 1182.0670 | 3546.8076 | 1183.2765 | 3 | 52.08 |
|          | 13.95 | 22.8 | TLMSSIEGAISAIR                              | ITRAQ4plex@N-term                                                                        |                                           | -0.0011 | 1662.9086 | 832.4615  | 1662.9096 | 832.4621  | 2 | 50.62 |
|          | 13.95 | 22.8 | VVFEVSETR                                   | ITRAQ4plex@N-term                                                                        |                                           | -0.0035 | 1208.6488 | 605.3317  | 1208.6523 | 605.3334  | 2 | 41.08 |
|          | 19.59 | 40.0 | AAIS                                        | ITRAQ4plex@N-term                                                                        | cleaved G-A@N-term; cleaved S-A@C-term    | -0.0028 | 504.3002  | 505.3075  | 504.3029  | 505.3102  | 1 | 56.17 |
|          | 19.59 | 40.0 | DLHI                                        | ITRAQ4plex@N-term                                                                        | cleaved P-D@N-term; cleaved I-A@C-term    | -0.0038 | 640.3628  | 641.3701  | 640.3666  | 641.3739  | 1 | 56.98 |
|          | 19.59 | 40.0 | DQSKIIHLELK                                 | ITRAQ4plex@N-term; Deamidated(Q)@2; ITRAQ4plex(S)@3; ITRAQ4plex(K)@4; ITRAQ4plex(K)@11   | missed K-I@4                              | 0.1562  | 1900.3042 | 634.4420  | 1900.1481 | 634.3900  | 3 | 54.49 |
|          | 19.59 | 40.0 | EEKDQSK                                     | ITRAQ4plex@N-term; ITRAQ4plex(K)@3; ITRAQ4plex(K)@7                                      | cleaved P-E@N-term                        | -0.0502 | 1294.6593 | 648.3369  | 1294.7094 | 648.3620  | 2 | 24.96 |
|          | 19.59 | 40.0 | EIDFIGDLVK                                  | ITRAQ4plex@N-term; ITRAQ4plex(K)@10                                                      | cleaved L-E@N-term                        | -0.0035 | 1435.8131 | 718.9138  | 1435.8166 | 718.9156  | 2 | 35.22 |
|          | 19.59 | 40.0 | GRGYVPAEEK                                  | ITRAQ4plex@N-term; Oxidation(R)@2; ITRAQ4plex(K)@10                                      | missed R-G@2                              | -0.0056 | 1408.7499 | 705.3822  | 1408.7554 | 705.3850  | 2 | 26.73 |
|          | 19.59 | 40.0 | KIEFNTEANTPNYK                              | ITRAQ4plex@N-term; ITRAQ4plex(K)@1; ITRAQ4plex(K)@15                                     | missed K-I@1                              | -0.0251 | 2157.1182 | 720.0466  | 2157.1432 | 720.0550  | 3 | 31.36 |
|          | 19.59 | 40.0 | LTLVWTDGVSVPDD AVAAQAK                      | ITRAQ4plex@N-term; ITRAQ4plex(K)@22                                                      |                                           | 0.0038  | 2560.3303 | 854.4507  | 2560.3264 | 854.4494  | 3 | 45.94 |
|          | 19.59 | 40.0 | SLEIDFIGDLVK                                | ITRAQ4plex@N-term; ITRAQ4plex(K)@12                                                      |                                           | 0.0265  | 1635.9592 | 818.9869  | 1635.9327 | 818.9736  | 2 | 57.51 |
| LIC12774 |       |      |                                             |                                                                                          |                                           |         |           |           |           |           |   |       |
|          | 2     | 13.1 | FRPGNNVGLGK                                 | ITRAQ4plex@N-term; Deamidated(N)@5; ITRAQ4plex(K)@11                                     |                                           | 0.0007  | 1446.8193 | 483.2804  | 1446.8187 | 483.2802  | 3 | 40.54 |
| LIC12747 |       |      |                                             |                                                                                          |                                           |         |           |           |           |           |   |       |
|          | 1.7   | 4.3  | AGFWGLLQPLADGIK                             | ITRAQ4plex@N-term; ITRAQ4plex(K)@15                                                      |                                           | -0.0132 | 1873.0574 | 625.3597  | 1873.0705 | 625.3641  | 3 | 39.21 |
|          | 1.7   | 4.3  | GPNRAGFWLLQPLA DGIK                         | ITRAQ4plex@N-term; ITRAQ4plex(K)@19                                                      | missed R-A@4                              | 0.0118  | 2297.3005 | 575.3324  | 2297.2888 | 575.3295  | 4 | 53.69 |
|          | 1.7   | 4.3  | VAGFIQDRK                                   | ITRAQ4plex@N-term; Deamidated(Q)@6; ITRAQ4plex(K)@9                                      | missed R-K@8                              | 0.0348  | 1321.7947 | 661.9046  | 1321.7598 | 661.8872  | 2 | 37.77 |
| LIC12705 |       |      |                                             |                                                                                          |                                           |         |           |           |           |           |   |       |
|          | 20.36 | 15.9 | AMYNDLGQLIQEAGP AFPAQVTGIDGVPDA GAPPDAMADEK | ITRAQ4plex@N-term; Deamidated(Q)@20; ITRAQ4plex(K)@41                                    |                                           | -0.0257 | 4479.1235 | 896.8320  | 4479.1494 | 896.8372  | 5 | 40.29 |
|          | 20.36 | 15.9 | ARESFMEDKNKTIKET LQGSADAGK                  | ITRAQ4plex@N-term; ITRAQ4plex(K)@9; ITRAQ4plex(K)@11; ITRAQ4plex(K)@14; ITRAQ4plex(K)@25 | missed R-E@2; missed K-N@9; missed K-T@11 | 0.0162  | 3473.8918 | 869.4802  | 3473.8757 | 869.4762  | 4 | 41.41 |
|          | 20.36 | 15.9 | DSGQ                                        | ITRAQ4plex@N-term                                                                        | cleaved D-D@N-term; cleaved Q-S@C-term    | 0.0042  | 549.2558  | 550.2631  | 549.2516  | 550.2589  | 1 | 49.61 |
|          | 20.36 | 15.9 | EDSNIIVSRPI                                 | ITRAQ4plex@N-term; Deamidated(N)@4                                                       | cleaved I-Q@C-term                        | 0.0807  | 1386.8284 | 694.4214  | 1386.7476 | 694.3811  | 2 | 36.95 |
|          | 20.36 | 15.9 | EDSNIIVSRPIQR                               | Glu->pyro-Glu@N-term; ITRAQ4plex(S)@3; Deamidated(R)@9                                   |                                           | 0.0280  | 1652.9248 | 827.4697  | 1652.8968 | 827.4557  | 2 | 34.06 |
|          | 20.36 | 15.9 | EDSNIIVSRPIQRTGPS R                         | Glu->pyro-Glu@N-term                                                                     | cleaved R-P@C-term; missed R-T@13         | 0.0736  | 2006.1394 | 669.7204  | 2006.0657 | 669.6959  | 3 | 38.83 |
|          | 20.36 | 15.9 | EGVQIKYYNII                                 | ITRAQ4plex@N-term; ITRAQ4plex(K)@6                                                       | cleaved I-Y@C-term; missed K-Y@6          | 0.0175  | 1626.9401 | 814.4773  | 1626.9225 | 814.4685  | 2 | 2.06  |
|          | 20.36 | 15.9 | EIFK                                        | ITRAQ4plex@N-term; ITRAQ4plex(K)@4                                                       |                                           | -0.0679 | 823.4368  | 824.4441  | 823.5047  | 824.5120  | 1 | 53.59 |
|          | 20.36 | 15.9 | ENIGIDK                                     | ITRAQ4plex@N-term; ITRAQ4plex(K)@7                                                       |                                           | -0.1209 | 1075.4908 | 538.7527  | 1075.6117 | 538.8131  | 2 | 36.87 |

|          |      |                                                         |                                                                                     |                                                                                     |         |           |           |           |           |   |       |
|----------|------|---------------------------------------------------------|-------------------------------------------------------------------------------------|-------------------------------------------------------------------------------------|---------|-----------|-----------|-----------|-----------|---|-------|
| 20.36    | 15.9 | ETLQGSADAGK                                             | ITRAQ4plex@N-term;<br>ITRAQ4plex(K)@11                                              |                                                                                     | 0.0017  | 1363.7203 | 682.8674  | 1363.7187 | 682.8666  | 2 | 23.49 |
| 20.36    | 15.9 | ETLQGSADAGKR                                            | ITRAQ4plex@N-term;<br>ITRAQ4plex(K)@11                                              | missed K-R@11                                                                       | -0.0257 | 1519.7941 | 507.6053  | 1519.8198 | 507.6139  | 3 | 25.49 |
| 20.36    | 15.9 | GPGQGGGGYQGNR                                           | ITRAQ4plex@N-term;<br>Oxidation(Y)@9;<br>Deamidated(Q)@10;<br>Hex(1)HexNAc(1)(N)@12 |                                                                                     | 0.0657  | 1729.8169 | 577.6129  | 1729.7513 | 577.5910  | 3 | 24.63 |
| 20.36    | 15.9 | GPGQGGGGYQGNR<br>PGGG                                   | ITRAQ4plex@N-term;<br>Deamidated(R)@13;<br>Oxidation(P)@17                          | cleaved G-Q@C-term; missed R-G@13                                                   | 0.0279  | 1729.8169 | 577.6129  | 1729.7890 | 577.6036  | 3 | 24.63 |
| 20.36    | 15.9 | GPGQGGGGYQGNR<br>PQQG                                   | ITRAQ4plex@N-term                                                                   | cleaved G-G@C-term; missed R-G@13                                                   | -7.0371 | 1736.7788 | 869.3967  | 1743.8159 | 872.9152  | 2 | 25.84 |
| 20.36    | 15.9 | GPGQGGGGYQGNR<br>PR                                     | ITRAQ4plex@N-term;<br>Hex(1)HexNAc(1)NeuAc(2)(N)@12                                 | missed R-G@13                                                                       | 0.0297  | 2605.1682 | 869.3967  | 2605.1385 | 869.3868  | 3 | 25.84 |
| 20.36    | 15.9 | GSVATVLIQNGTLR                                          | No ITRAQ4plex@N-term                                                                |                                                                                     | 0.0395  | 1427.8491 | 714.9318  | 1427.8096 | 714.9121  | 2 | 46.67 |
| 20.36    | 15.9 | IDLPAANPEK                                              | ITRAQ4plex@N-term;<br>Oxidation(P)@8;<br>ITRAQ4plex(K)@10                           |                                                                                     | 0.0630  | 1370.8279 | 457.9499  | 1370.7649 | 457.9289  | 3 | 38.06 |
| 20.36    | 15.9 | IMQELANHGLQSEEW<br>GGETMYAKISAR                         | ITRAQ4plex@N-term;<br>Deamidated(Q)@3;<br>ITRAQ4plex(T)@19;<br>ITRAQ4plex(K)@23     | missed K-I@23                                                                       | 0.0762  | 3481.8098 | 871.4597  | 3481.7335 | 871.4407  | 4 | 36.57 |
| 20.36    | 15.9 | IQEAGPAFFPAQVTGID<br>GVPDAGAPFDAMADE<br>K               | ITRAQ4plex@N-term;<br>Deamidated(Q)@11;<br>ITRAQ4plex(K)@32                         | cleaved L-I@N-term                                                                  | 0.2044  | 3473.8948 | 869.4810  | 3473.6904 | 869.4299  | 4 | 53.83 |
| 20.36    | 15.9 | KGDDPSTPSAASPK                                          | ITRAQ4plex@N-term;<br>ITRAQ4plex(K)@1;<br>ITRAQ4plex(K)@15                          | missed K-G@1                                                                        | -0.0387 | 1885.9724 | 629.6647  | 1886.0111 | 629.6776  | 3 | 27.41 |
| 20.36    | 15.9 | LDPGRGSVATVLIQNG<br>TLR                                 | ITRAQ4plex@N-term;<br>Oxidation(D)@2; Oxidation(P)@3                                | missed R-G@5                                                                        | -0.0612 | 2142.1267 | 715.0495  | 2142.1879 | 715.0699  | 3 | 20.09 |
| 20.36    | 15.9 | LOGS                                                    | ITRAQ4plex@N-term                                                                   | cleaved T-L@N-term; cleaved S-A@C-term                                              | 0.0244  | 547.3333  | 548.3405  | 547.3088  | 548.3160  | 1 | 42.24 |
| 20.36    | 15.9 | LSGK                                                    | No ITRAQ4plex@N-term;<br>ITRAQ4plex(K)@4                                            | cleaved V-L@N-term                                                                  | -0.0413 | 547.3039  | 548.3112  | 547.3451  | 548.3524  | 1 | 41.87 |
| 20.36    | 15.9 | MNLKPGDVIGK                                             | ITRAQ4plex@N-term;<br>ITRAQ4plex(K)@4;<br>ITRAQ4plex(K)@11                          |                                                                                     | -0.0179 | 1602.9314 | 535.3177  | 1602.9493 | 535.3237  | 3 | 31.84 |
| 20.36    | 15.9 | PSTPSAASPK                                              | No ITRAQ4plex@N-term;<br>ITRAQ4plex(K)@11                                           | cleaved D-P@N-term                                                                  | -0.0109 | 1182.6257 | 592.3201  | 1182.6366 | 592.3256  | 2 | 24.46 |
| 20.36    | 15.9 | QDAGRPPR                                                | Formyl@N-term                                                                       |                                                                                     | -0.0053 | 923.4521  | 462.7333  | 923.4573  | 462.7359  | 2 | 30.09 |
| 20.36    | 15.9 | QGGGSSYPSPR                                             | ITRAQ4plex@N-term;<br>ITRAQ4plex(Y)@7                                               |                                                                                     | 0.0615  | 1379.7653 | 690.8899  | 1379.7037 | 690.8591  | 2 | 33.61 |
| 20.36    | 15.9 | QGNRGPQGGGGYQ<br>GNR                                    | Gln->pyro-Glu@N-term;<br>Deamidated(N)@3                                            | cleaved Y-Q@N-term; missed R-G@4                                                    | 0.1091  | 1642.8287 | 822.4216  | 1642.7196 | 822.3671  | 2 | 52.20 |
| 20.36    | 15.9 | QGNRGPQGGGGYQ<br>GNRGPQGGGGYQ<br>QGNRGPQGGGGYQ<br>GNRGP | ITRAQ4plex@N-term;<br>Deamidated(N)@16;<br>Deamidated(Q)@29;<br>Deamidated(N)@31    | cleaved Y-Q@N-term; missed R-G@4;<br>missed R-G@17; missed R-G@32; missed<br>R-G@45 | 0.1572  | 4641.2778 | 1161.3270 | 4641.1209 | 1161.2875 | 4 | 42.36 |
| 20.36    | 15.9 | QGSADAGK                                                | ITRAQ4plex@N-term;<br>ITRAQ4plex(K)@8                                               | cleaved L-Q@N-term                                                                  | 0.0135  | 1020.5579 | 511.2862  | 1020.5444 | 511.2795  | 2 | 25.87 |
| 20.36    | 15.9 | STSDRDFSGAENTK                                          | ITRAQ4plex@N-term;<br>ITRAQ4plex(K)@14                                              | missed R-D@5                                                                        | -0.0112 | 1801.8574 | 601.6264  | 1801.8686 | 601.6301  | 3 | 26.68 |
| 20.36    | 15.9 | SVTSK                                                   | No ITRAQ4plex@N-term;<br>ITRAQ4plex(K)@5                                            | cleaved S-S@N-term                                                                  | 0.0209  | 664.4087  | 665.4160  | 664.3877  | 665.3950  | 1 | 58.04 |
| 20.36    | 15.9 | TGPSRPNSGGYQ<br>NR                                      | ITRAQ4plex@N-term                                                                   |                                                                                     | -0.0192 | 1747.8281 | 583.6166  | 1747.8472 | 583.6230  | 3 | 23.82 |
| 20.36    | 15.9 | TIKETLQGSADAGK                                          | ITRAQ4plex@N-term;<br>ITRAQ4plex(K)@3;<br>ITRAQ4plex(K)@14                          |                                                                                     | -0.0450 | 1850.0024 | 617.6747  | 1850.0475 | 617.6898  | 3 | 42.36 |
| 20.36    | 15.9 | VDMDVMLASASNALII<br>GFHVR                               | ITRAQ4plex@N-term;<br>Oxidation(H)@19                                               | cleaved I-V@N-term                                                                  | -0.0004 | 2418.2517 | 807.0912  | 2418.2521 | 807.0913  | 3 | 48.36 |
| 20.36    | 15.9 | VGDPFVAGVFSGR                                           | Delta:H(2)C(2)@N-term;<br>Methyl(D)@3                                               |                                                                                     | -0.0008 | 1346.6975 | 674.3560  | 1346.6983 | 674.3564  | 2 | 36.77 |
| 20.36    | 15.9 | VVGVSQVVPKEI                                            | ITRAQ4plex@N-term;<br>Oxidation(P)@10;<br>ITRAQ4plex(K)@11                          | cleaved I-T@C-term                                                                  | -0.0271 | 1572.9059 | 787.4602  | 1572.9330 | 787.4738  | 2 | 44.54 |
| LIC12573 |      |                                                         |                                                                                     |                                                                                     |         |           |           |           |           |   |       |
| 7.52     | 13.1 | AEGI                                                    | ITRAQ4plex@N-term                                                                   | cleaved V-A@N-term; cleaved I-I@C-term                                              | -0.0076 | 532.2902  | 533.2975  | 532.2979  | 533.3051  | 1 | 49.25 |
| 15.1     | 20.3 | ANVPFGVIDK                                              | ITRAQ4plex@N-term;<br>ITRAQ4plex(K)@11                                              |                                                                                     | -0.0027 | 1445.8459 | 723.9302  | 1445.8486 | 723.9316  | 2 | 32.71 |
| 15.1     | 20.3 | ANVPFGVIDKK                                             | ITRAQ4plex@N-term;<br>ITRAQ4plex(K)@11;<br>ITRAQ4plex(K)@12                         | missed K-K@11                                                                       | -0.0022 | 1718.0435 | 573.6884  | 1718.0456 | 573.6891  | 3 | 33.65 |

|          |      |                         |                                                                                                           |                                                               |         |           |          |           |          |   |       |
|----------|------|-------------------------|-----------------------------------------------------------------------------------------------------------|---------------------------------------------------------------|---------|-----------|----------|-----------|----------|---|-------|
| 15.1     | 20.3 | AQIHAGGRGKGGGVK         | ITRAQ4plex@N-term; No ITRAQ4plex(K)@10; ITRAQ4plex(K)@15                                                  | missed R-G@8; missed K-G@10                                   | 0.0322  | 1680.0110 | 561.0109 | 1679.9787 | 561.0002 | 3 | 33.44 |
| 15.1     | 20.3 | AVDK                    | ITRAQ4plex@N-term; ITRAQ4plex(K)@4                                                                        | cleaved A-A@N-term                                            | -0.0255 | 719.4166  | 720.4239 | 719.4421  | 720.4494 | 1 | 55.36 |
| 7.52     | 13.1 | AVDLKVPLVVR             | No ITRAQ4plex@N-term; Oxidation(D)@3; ITRAQ4plex(K)@5                                                     | missed K-V@5                                                  | -0.0330 | 1367.8292 | 684.9219 | 1367.8622 | 684.9384 | 2 | 45.36 |
| 15.1     | 20.3 | AVDLKVPLVRLQGT NSELGR   | ITRAQ4plex@N-term; ITRAQ4plex(K)@5; Oxidation(P)@7; Deamidated(R)@11; Deamidated(Q)@13                    | missed K-V@5; missed R-L@11                                   | -0.1085 | 2569.3596 | 857.4605 | 2569.4683 | 857.4967 | 3 | 44.06 |
| 15.1     | 20.3 | AYIK                    | No ITRAQ4plex@N-term; ITRAQ4plex(K)@4                                                                     | cleaved E-A@N-term                                            | -0.0048 | 637.3873  | 638.3946 | 637.3921  | 638.3994 | 1 | 56.42 |
| 15.1     | 20.3 | DITEEDPLEVQASEFN LNYVK  | ITRAQ4plex@N-term; ITRAQ4plex(K)@21                                                                       |                                                               | -0.0155 | 2740.3533 | 914.4584 | 2740.3687 | 914.4635 | 3 | 35.25 |
| 7.52     | 13.1 | EILR                    | ITRAQ4plex@N-term                                                                                         |                                                               | 0.0274  | 673.4519  | 674.4592 | 673.4245  | 674.4317 | 1 | 58.31 |
| 7.52     | 13.1 | EPAN                    | No ITRAQ4plex@N-term                                                                                      | cleaved A-E@N-term; cleaved N-F@C-term                        | 0.1497  | 429.3357  | 430.3430 | 429.1860  | 430.1932 | 1 | 58.43 |
| 15.1     | 20.3 | EYLLSILLDR              | ITRAQ4plex@N-term                                                                                         |                                                               | -0.0068 | 1427.7715 | 714.8930 | 1427.7782 | 714.8964 | 2 | 44.57 |
| 15.1     | 20.3 | GIFVNIFFGIVR            | ITRAQ4plex@N-term                                                                                         |                                                               | -0.0330 | 1434.8140 | 718.4142 | 1434.8469 | 718.4307 | 2 | 46.25 |
| 15.1     | 20.3 | IAIDPGIGLQVNOAR         | ITRAQ4plex@N-term; Oxidation(P)@5; Deamidated(N)@12                                                       |                                                               | 0.0391  | 1724.9934 | 576.0051 | 1724.9543 | 575.9920 | 3 | 39.99 |
| 15.1     | 20.3 | IILGDPNVK               | ITRAQ4plex@N-term; ITRAQ4plex(K)@9                                                                        |                                                               | -0.0141 | 1255.7603 | 628.8874 | 1255.7744 | 628.8945 | 2 | 29.91 |
| 7.52     | 13.1 | ILGMQLITPQTGPEGK        | ITRAQ4plex@N-term; Deamidated(Q)@5; Deamidated(Q)@10; ITRAQ4plex(K)@16                                    |                                                               | 0.0382  | 1972.1177 | 658.3798 | 1972.0794 | 658.3671 | 3 | 50.77 |
| 15.1     | 20.3 | ITGVDDLREAASTIAK        | No ITRAQ4plex@N-term; Oxidation(R)@8; ITRAQ4plex(K)@16                                                    | missed R-E@8                                                  | -0.0667 | 1818.9142 | 607.3120 | 1818.9809 | 607.3342 | 3 | 26.27 |
| 15.1     | 20.3 | ITGVDDLREAASTIAK LIG    | ITRAQ4plex@N-term; Oxidation(D)@6; Oxidation(R)@8; ITRAQ4plex(K)@16                                       | missed R-E@8; missed K-L@16                                   | -0.0861 | 2262.1814 | 755.0677 | 2262.2675 | 755.0964 | 3 | 36.64 |
| 15.1     | 20.3 | LITP                    | ITRAQ4plex@N-term                                                                                         | cleaved Q-L@N-term; cleaved P-Q@C-term                        | -0.0291 | 586.3521  | 587.3594 | 586.3812  | 587.3885 | 1 | 54.24 |
| 15.1     | 20.3 | LOGTNSSELGREVLNK SGLK   | ITRAQ4plex@N-term; Deamidated(Q)@2; Deamidated(N)@5; ITRAQ4plex(K)@15; ITRAQ4plex(S)@16; ITRAQ4plex(K)@19 | missed R-E@10; missed K-S@15                                  | -0.0101 | 2620.4783 | 874.5000 | 2620.4883 | 874.5034 | 3 | 52.53 |
| 15.1     | 20.3 | QLAFELGLPAESHK          | ITRAQ4plex@N-term; ITRAQ4plex(K)@14                                                                       |                                                               | 0.0054  | 1827.0188 | 610.0135 | 1827.0134 | 610.0117 | 3 | 33.55 |
| 15.1     | 20.3 | SGLK                    | No ITRAQ4plex@N-term; ITRAQ4plex(K)@4                                                                     |                                                               | -0.0392 | 547.3060  | 548.3133 | 547.3451  | 548.3524 | 1 | 38.83 |
| 15.1     | 20.3 | TGGSVVVVK               | ITRAQ4plex@N-term; ITRAQ4plex(K)@9                                                                        |                                                               | -0.0130 | 1132.6930 | 567.3538 | 1132.7059 | 567.3602 | 2 | 27.14 |
| 15.1     | 20.3 | TKEDIAAIVDK             | ITRAQ4plex@N-term; ITRAQ4plex(K)@2; ITRAQ4plex(K)@11                                                      |                                                               | -0.0396 | 1591.8751 | 531.6323 | 1591.9147 | 531.6455 | 3 | 30.32 |
| 7.52     | 13.1 | VIDKK                   | No ITRAQ4plex@N-term; ITRAQ4plex(K)@4; ITRAQ4plex(K)@5                                                    | cleaved V-V@N-term; missed K-K@4                              | -0.0002 | 889.5839  | 445.7992 | 889.5840  | 445.7993 | 2 | 36.74 |
| 15.1     | 20.3 | VNIFGGIVR               | ITRAQ4plex@N-term; Deamidated(N)@2                                                                        | cleaved F-V@N-term                                            | 0.0107  | 1118.6677 | 560.3411 | 1118.6570 | 560.3358 | 2 | 28.99 |
| LIC12565 |      |                         |                                                                                                           |                                                               |         |           |          |           |          |   |       |
| 3.4      | 4.9  | ADKMMRTGLRVGDLL DTSYQTR | ITRAQ4plex@N-term; ITRAQ4plex(K)@3                                                                        | cleaved Y-A@N-term; missed K-M@3; missed R-T@6; missed R-V@10 | -1.0218 | 2813.4507 | 704.3699 | 2814.4724 | 704.6254 | 4 | 41.48 |
| 3.34     | 2.8  | EAGEK                   | ITRAQ4plex@N-term; ITRAQ4plex(K)@5                                                                        | cleaved G-E@N-term                                            | 0.0525  | 820.5060  | 411.2603 | 820.4534  | 411.2340 | 2 | 40.99 |
| 3.4      | 4.9  | ETTLSQEHK               | ITRAQ4plex@N-term; ITRAQ4plex(K)@9                                                                        |                                                               | 0.0001  | 1359.7239 | 454.2486 | 1359.7238 | 454.2485 | 3 | 25.03 |
| 3.34     | 2.8  | GGFGATTGRPR             | ITRAQ4plex@N-term                                                                                         |                                                               | -0.0129 | 1348.6840 | 450.5686 | 1348.6969 | 450.5729 | 3 | 35.48 |
| 3.34     | 2.8  | HLVDEK                  | No ITRAQ4plex@N-term; ITRAQ4plex(K)@6                                                                     |                                                               | 0.0147  | 883.5032  | 442.7589 | 883.4885  | 442.7515 | 2 | 38.88 |
| 3.4      | 4.9  | HSVRINGITSIALTK         | ITRAQ4plex@N-term; ITRAQ4plex(K)@15                                                                       | missed R-I@4                                                  | -0.0614 | 1897.0739 | 633.3652 | 1897.1353 | 633.3857 | 3 | 46.35 |
| 3.34     | 2.8  | LNGKTLDCFPSQGLD K       | No ITRAQ4plex@N-term; ITRAQ4plex(K)@4; Methylthio(C)@8; ITRAQ4plex(K)@16                                  | missed K-T@4                                                  | 0.0943  | 2069.1472 | 518.2941 | 2069.0529 | 518.2705 | 4 | 47.23 |

|          |       |      |                              |                                                                                                    |                                                         |         |           |           |           |           |   |       |
|----------|-------|------|------------------------------|----------------------------------------------------------------------------------------------------|---------------------------------------------------------|---------|-----------|-----------|-----------|-----------|---|-------|
|          | 3.34  | 2.8  | QIDS                         | Gln->pyro-Glu@N-term                                                                               | cleaved S-Q@N-term; cleaved S-A@C-term                  | 0.1552  | 444.3409  | 445.3481  | 444.1856  | 445.1929  | 1 | 1.85  |
|          | 3.4   | 4.9  | VGDLLDTSYQTR                 | Delta:H(2)C(2)@N-term;<br>Methyl(D)@3                                                              |                                                         | 0.0111  | 1406.7153 | 704.3649  | 1406.7042 | 704.3594  | 2 | 41.38 |
|          | 3.34  | 2.8  | VIDFLSK                      | ITRAQ4plex@N-term;<br>ITRAQ4plex(K)@7                                                              |                                                         | 0.0098  | 1108.6835 | 555.3490  | 1108.6736 | 555.3441  | 2 | 46.12 |
| LIC12564 |       |      |                              |                                                                                                    |                                                         |         |           |           |           |           |   |       |
|          | 2     | 4.4  | NSLNINLSK                    | ITRAQ4plex@N-term;<br>Deamidated(N)@1;<br>Deamidated(N)@4;<br>Deamidated(N)@6;<br>ITRAQ4plex(K)@10 |                                                         | 0.0541  | 1379.7928 | 690.9037  | 1379.7388 | 690.8767  | 2 | 45.08 |
|          | 2     | 4.4  | SSLK                         | No ITRAQ4plex@N-term;<br>ITRAQ4plex(K)@4                                                           | cleaved E-S@N-term                                      | 0.0017  | 577.3574  | 578.3647  | 577.3557  | 578.3630  | 1 | 56.92 |
|          | 2     | 4.4  | WIPDGFHFLGPEDSK              | ITRAQ4plex@N-term;<br>ITRAQ4plex(K)@15                                                             |                                                         | 0.0208  | 2032.0507 | 678.3575  | 2032.0298 | 678.3505  | 3 | 35.73 |
| LIC12474 |       |      |                              |                                                                                                    |                                                         |         |           |           |           |           |   |       |
|          | 19.52 | 12.4 | AASIR                        | ITRAQ4plex@N-term                                                                                  | cleaved Q-A@N-term                                      | 0.0326  | 660.4366  | 661.4439  | 660.4041  | 661.4113  | 1 | 59.58 |
|          | 27.84 | 19.9 | DFIIDLVCYR                   | ITRAQ4plex@N-term;<br>Methylthio(C)@8                                                              |                                                         | 0.0082  | 1445.7251 | 723.8698  | 1445.7169 | 723.8657  | 2 | 47.05 |
|          | 27.84 | 19.9 | DPLGIQKPNR                   | ITRAQ4plex@N-term;<br>ITRAQ4plex(K)@7;<br>Deamidated(N)@9                                          | cleaved L-D@N-term                                      | -0.0354 | 1425.7830 | 476.2682  | 1425.8183 | 476.2801  | 3 | 29.17 |
|          | 19.52 | 12.4 | EMGIINLLNAY                  | Glu->pyro-Glu@N-term;<br>Deamidated(N)@6                                                           | cleaved Y-R@C-term                                      | -0.0207 | 1232.5905 | 617.3025  | 1232.6111 | 617.3128  | 2 | 43.43 |
|          | 27.84 | 19.9 | EMGIINLLNAYR                 | ITRAQ4plex@N-term                                                                                  |                                                         | 0.0003  | 1549.8412 | 775.9279  | 1549.8408 | 775.9277  | 2 | 36.92 |
|          | 19.52 | 12.4 | ERIEELLPGNAR                 | Carbamyl@N-term;<br>Deamidated(N)@10                                                               | missed R-I@2                                            | 0.0546  | 1439.7914 | 720.9030  | 1439.7369 | 720.8757  | 2 | 43.42 |
|          | 27.84 | 19.9 | ESPSPAAGHMK                  | ITRAQ4plex@N-term;<br>ITRAQ4plex(K)@11                                                             | cleaved H-E@N-term                                      | -0.0068 | 1398.7101 | 467.2440  | 1398.7169 | 467.2462  | 3 | 25.84 |
|          | 27.84 | 19.9 | FPASLSPVEDILQGA<br>R         | ITRAQ4plex@N-term                                                                                  |                                                         | 0.0036  | 1990.0681 | 996.0413  | 1990.0646 | 996.0396  | 2 | 41.19 |
|          | 27.84 | 19.9 | GFQPIIHVNGDDPEA<br>VYR       | ITRAQ4plex@N-term;<br>Deamidated(N)@10                                                             |                                                         | -0.0046 | 2284.1565 | 762.3928  | 2284.1610 | 762.3943  | 3 | 34.49 |
|          | 27.84 | 19.9 | IRLSGQDSQRGTFSH<br>R         | ITRAQ4plex@N-term;<br>Oxidation(R)@10                                                              | missed R-L@2; missed R-G@10                             | 0.0648  | 2004.1019 | 669.0413  | 2004.0371 | 669.0196  | 3 | 45.62 |
|          | 19.52 | 12.4 | KMESPEFLAPLPR                | ITRAQ4plex@N-term;<br>ITRAQ4plex(K)@1                                                              | missed K-M@1                                            | 0.0000  | 1802.0004 | 601.6741  | 1802.0004 | 601.6741  | 3 | 47.19 |
|          | 27.84 | 19.9 | KPLVIVTPK                    | ITRAQ4plex@N-term;<br>ITRAQ4plex(K)@1;<br>ITRAQ4plex(K)@9                                          |                                                         | -0.0023 | 1425.9625 | 476.3281  | 1425.9648 | 476.3289  | 3 | 31.47 |
|          | 27.84 | 19.9 | LAEIVDLYEK                   | ITRAQ4plex@N-term;<br>ITRAQ4plex(K)@10                                                             |                                                         | 0.0059  | 1479.8488 | 740.9316  | 1479.8428 | 740.9287  | 2 | 34.22 |
|          | 19.52 | 12.4 | LAPLPRGIK                    | ITRAQ4plex@N-term;<br>Deamidated(R)@6;<br>ITRAQ4plex(K)@9                                          | cleaved F-L@N-term; missed R-G@6                        | -0.0170 | 1252.7941 | 627.4043  | 1252.8111 | 627.4128  | 2 | 44.40 |
|          | 27.84 | 19.9 | LDPLGIQKPNR                  | ITRAQ4plex@N-term;<br>ITRAQ4plex(K)@8                                                              |                                                         | -0.0016 | 1537.9169 | 513.6462  | 1537.9184 | 513.6467  | 3 | 31.14 |
|          | 27.84 | 19.9 | LGHNETDEPAFTQPK              | ITRAQ4plex@N-term;<br>ITRAQ4plex(K)@15                                                             |                                                         | -0.0017 | 1970.9924 | 658.0048  | 1970.9941 | 658.0053  | 3 | 28.86 |
|          | 27.84 | 19.9 | LHLQEQQQLVLDAFQ<br>A         | ITRAQ4plex@N-term                                                                                  |                                                         | -0.0421 | 2011.0074 | 1006.5110 | 2011.0496 | 1006.5321 | 2 | 53.92 |
|          | 19.52 | 12.4 | LHNISPADITVVDSET<br>LGR      | Carbamyl@N-term                                                                                    |                                                         | 0.0131  | 2194.0996 | 1098.0570 | 2194.0866 | 1098.0506 | 2 | 46.57 |
|          | 27.84 | 19.9 | LMALYGENGALLEELY<br>NQYK     | ITRAQ4plex@N-term;<br>Deamidated(N)@8;<br>ITRAQ4plex(K)@20                                         |                                                         | 0.0063  | 2620.3401 | 874.4540  | 2620.3338 | 874.4519  | 3 | 38.74 |
|          | 27.84 | 19.9 | LNPETLDKEWK                  | ITRAQ4plex@N-term;<br>ITRAQ4plex(K)@8;<br>ITRAQ4plex(K)@11                                         |                                                         | -0.0321 | 1803.9775 | 602.3331  | 1804.0096 | 602.3438  | 3 | 34.40 |
|          | 27.84 | 19.9 | LSGQ                         | ITRAQ4plex@N-term                                                                                  | cleaved Q-D@C-term                                      | 0.0244  | 547.3333  | 548.3405  | 547.3088  | 548.3160  | 1 | 42.24 |
|          | 19.52 | 12.4 | LSLAFNPShLECVDPV<br>VTGSVR   | ITRAQ4plex@N-term;<br>Deamidated(N)@6;<br>Methylthio(C)@12                                         |                                                         | 0.1287  | 2530.3970 | 844.4729  | 2530.2682 | 844.4300  | 3 | 49.30 |
|          | 19.52 | 12.4 | LSLAFNPShLECVDPV<br>VTGSVRAR | ITRAQ4plex@N-term;<br>Oxidation(P)@7; Oxidation(H)@9<br>Methylthio(C)@12                           | missed R-A@22                                           | 0.1182  | 2788.5303 | 930.5174  | 2788.4122 | 930.4780  | 3 | 57.60 |
|          | 27.84 | 19.9 | NARL                         | ITRAQ4plex@N-term                                                                                  | cleaved G-N@N-term; cleaved L-V@C-term;<br>missed R-L@3 | 0.0816  | 616.4594  | 617.4667  | 616.3778  | 617.3851  | 1 | 55.94 |
|          | 19.52 | 12.4 | QMLR                         | ITRAQ4plex@N-term                                                                                  |                                                         | 0.0171  | 690.4139  | 691.4212  | 690.3969  | 691.4041  | 1 | 57.98 |
|          | 27.84 | 19.9 | QTLIGDKDR                    | ITRAQ4plex@N-term;<br>ITRAQ4plex(K)@7                                                              |                                                         | -0.0147 | 1332.7458 | 445.2559  | 1332.7605 | 445.2608  | 3 | 27.83 |
|          | 27.84 | 19.9 | RLGHNETDEPAFTQPK             | ITRAQ4plex@N-term;<br>Oxidation(H)@4;<br>ITRAQ4plex(K)@16                                          | missed R-L@1                                            | -0.0031 | 2143.0872 | 715.3696  | 2143.0902 | 715.3707  | 3 | 46.98 |

|          |      |                                |                                                                                 |                                                         |         |           |          |           |          |   |       |
|----------|------|--------------------------------|---------------------------------------------------------------------------------|---------------------------------------------------------|---------|-----------|----------|-----------|----------|---|-------|
| 27.84    | 19.9 | SAGK                           | Protein Terminal Acetyl@N-term;<br>ITRAQ4plex(K)@4                              | cleaved F-S@N-term                                      | -0.0049 | 547.3039  | 548.3112 | 547.3088  | 548.3160 | 1 | 41.87 |
| 27.84    | 19.9 | SAVATSFTDAQAASIR               | ITRAQ4plex@N-term                                                               |                                                         | 0.0044  | 1738.9015 | 870.4580 | 1738.8972 | 870.4559 | 2 | 58.53 |
| 19.52    | 12.4 | SRST                           | ITRAQ4plex@N-term                                                               | cleaved E-S@N-term; cleaved T-L@C-term;<br>missed R-S@2 | 0.0082  | 593.3337  | 594.3409 | 593.3255  | 594.3328 | 1 | 50.51 |
| 27.84    | 19.9 | STLYATDLAK                     | ITRAQ4plex@N-term;<br>ITRAQ4plex(K)@10                                          |                                                         | -0.0172 | 1369.7524 | 685.8835 | 1369.7697 | 685.8921 | 2 | 29.01 |
| 27.84    | 19.9 | TDKDNLSYADVK                   | ITRAQ4plex@N-term;<br>ITRAQ4plex(K)@3;<br>ITRAQ4plex(K)@12                      |                                                         | -0.0292 | 1799.9338 | 600.9852 | 1799.9631 | 600.9950 | 3 | 30.52 |
| 27.84    | 19.9 | VDTMQGVWSK                     | ITRAQ4plex@N-term;<br>Deamidated(Q)@5;<br>ITRAQ4plex(K)@10                      |                                                         | 0.0276  | 1438.7646 | 480.5955 | 1438.7370 | 480.5863 | 3 | 25.65 |
| 27.84    | 19.9 | VEQIYFFPAK                     | ITRAQ4plex@N-term;<br>Oxidation(F)@8;<br>ITRAQ4plex(K)@10                       |                                                         | 0.0337  | 1494.8663 | 748.4404 | 1494.8326 | 748.4236 | 2 | 39.04 |
| 19.52    | 12.4 | VQALTSVPQGF                    | ITRAQ4plex@N-term                                                               | cleaved I-V@N-term; cleaved F-T@C-term                  | -0.0044 | 1289.7057 | 430.9092 | 1289.7101 | 430.9107 | 3 | 39.31 |
| 19.52    | 12.4 | VVFSAGK                        | ITRAQ4plex@N-term;<br>ITRAQ4plex(K)@7                                           |                                                         | -0.0029 | 994.6026  | 498.3086 | 994.6055  | 498.3100 | 2 | 38.42 |
| 19.52    | 12.4 | YHLGYSNSR                      | No ITRAQ4plex@N-term;<br>Deamidated(N)@7                                        |                                                         | 0.0114  | 1096.5052 | 549.2599 | 1096.4938 | 549.2542 | 2 | 37.50 |
| 19.52    | 12.4 | YIPLNHSSK                      | ITRAQ4plex@N-term;<br>ITRAQ4plex(K)@10                                          |                                                         | 0.0018  | 1458.8456 | 487.2892 | 1458.8438 | 487.2886 | 3 | 43.34 |
| LIC12350 |      |                                |                                                                                 |                                                         |         |           |          |           |          |   |       |
| 5.72     | 6.3  | AAIFPLMK                       | No ITRAQ4plex@N-term;<br>ITRAQ4plex(K)@8                                        |                                                         | 0.0447  | 1033.6564 | 517.8354 | 1033.6116 | 517.8131 | 2 | 39.75 |
| 5.72     | 6.3  | EIGT                           | No ITRAQ4plex@N-term                                                            | cleaved D-E@N-term; cleaved T-P@C-term                  | 0.0354  | 418.2418  | 419.2491 | 418.2064  | 419.2136 | 1 | 49.86 |
| 5.72     | 6.3  | EIMA                           | Glu->pyro-Glu@N-term                                                            | cleaved N-E@N-term; cleaved A-R@C-term                  | 0.0360  | 444.2403  | 445.2475 | 444.2043  | 445.2115 | 1 | 16.49 |
| 5.72     | 6.3  | FADLSKLGNEYDDGG<br>AIGK        | ITRAQ4plex@N-term;<br>ITRAQ4plex(K)@6;<br>Deamidated(N)@9;<br>ITRAQ4plex(K)@20  | cleaved I-F@N-term; missed K-L@6                        | -0.0160 | 2515.3010 | 839.4410 | 2515.3172 | 839.4463 | 3 | 35.37 |
| 5.72     | 6.3  | GEGFATGLTLEK                   | ITRAQ4plex@N-term;<br>ITRAQ4plex(K)@12                                          |                                                         | 0.0142  | 1509.8424 | 755.9285 | 1509.8282 | 755.9214 | 2 | 48.13 |
| 5.72     | 6.3  | GGLSNTFDYGPYGVE<br>LLQLNKQLWWK | ITRAQ4plex@N-term;<br>ITRAQ4plex(K)@21;<br>Oxidation(W)@25;<br>ITRAQ4plex(K)@26 | cleaved Y-G@N-term; missed K-Q@21                       | 0.0888  | 3473.9238 | 869.4882 | 3473.8349 | 869.4660 | 4 | 12.05 |
| 5.72     | 6.3  | KIPFGIAQIGK                    | ITRAQ4plex@N-term;<br>ITRAQ4plex(K)@1;<br>ITRAQ4plex(K)@11                      | missed K-I@1                                            | -0.0450 | 1602.9738 | 535.3318 | 1603.0187 | 535.3468 | 3 | 36.47 |
| 5.72     | 6.3  | LGNEYDDGGAIGKR                 | ITRAQ4plex@N-term;<br>Deamidated(N)@3;<br>ITRAQ4plex(K)@14;<br>Oxidation(R)@15  | missed K-R@14                                           | 0.0204  | 1881.9880 | 628.3366 | 1881.9676 | 628.3298 | 3 | 30.11 |
| 5.72     | 6.3  | LLNP                           | No ITRAQ4plex@N-term;<br>Deamidated(N)@3                                        | cleaved I-L@N-term; cleaved P-K@C-term                  | 0.0110  | 456.2694  | 457.2766 | 456.2584  | 457.2657 | 1 | 56.48 |
| 5.72     | 6.3  | LNFK                           | ITRAQ4plex@N-term;<br>ITRAQ4plex(K)@4                                           | cleaved F-L@N-term                                      | 0.0016  | 808.5067  | 405.2606 | 808.5051  | 405.2598 | 2 | 29.09 |
| 5.72     | 6.3  | TDYDLNQHQK                     | ITRAQ4plex@N-term;<br>ITRAQ4plex(K)@10                                          |                                                         | 0.0063  | 1548.7841 | 517.2686 | 1548.7776 | 517.2665 | 3 | 26.38 |
| 5.72     | 6.3  | VSTT                           | ITRAQ4plex@N-term                                                               | cleaved V-V@N-term; cleaved T-R@C-term                  | 0.0325  | 550.3409  | 551.3482 | 550.3084  | 551.3157 | 1 | 56.04 |
| 5.72     | 6.3  | VVEP                           | ITRAQ4plex@N-term                                                               | cleaved F-V@N-term; cleaved P-A@C-term                  | 0.0104  | 586.3553  | 587.3625 | 586.3448  | 587.3521 | 1 | 53.86 |
| 5.72     | 6.3  | YQDQVQNK                       | ITRAQ4plex@N-term;<br>ITRAQ4plex(K)@8                                           |                                                         | -0.0132 | 1309.6738 | 655.8442 | 1309.6870 | 655.8508 | 2 | 26.62 |
| 5.72     | 6.3  | YVPFVVEPALGVNR                 | ITRAQ4plex@N-term;<br>Deamidated(N)@13                                          |                                                         | -0.0243 | 1703.9126 | 852.9636 | 1703.9368 | 852.9757 | 2 | 34.37 |
| LIC12335 |      |                                |                                                                                 |                                                         |         |           |          |           |          |   |       |
| 7.73     | 11.8 | ADPEIFAALK                     | ITRAQ4plex@N-term;<br>ITRAQ4plex(K)@10                                          |                                                         | 0.0056  | 1361.7854 | 681.9000 | 1361.7798 | 681.8972 | 2 | 33.55 |
| 7.73     | 11.8 | GGIQEMTQK                      | ITRAQ4plex@N-term;<br>Deamidated(Q)@8;<br>ITRAQ4plex(K)@9                       |                                                         | 0.0201  | 1279.6887 | 640.8516 | 1279.6686 | 640.8416 | 2 | 30.59 |
| 7.73     | 11.8 | IDFSK                          | ITRAQ4plex@N-term;<br>ITRAQ4plex(K)@5                                           | cleaved T-I@N-term                                      | 0.0062  | 896.5273  | 449.2709 | 896.5211  | 449.2678 | 2 | 29.80 |
| 7.73     | 11.8 | IYKPIPYGVDSK                   | ITRAQ4plex@N-term;<br>ITRAQ4plex(K)@3;<br>ITRAQ4plex(K)@12                      |                                                         | -0.0010 | 1811.0548 | 604.6922 | 1811.0558 | 604.6926 | 3 | 31.16 |

|          |      |      |                                 |                                                                                                     |                                                         |         |           |          |           |          |   |       |
|----------|------|------|---------------------------------|-----------------------------------------------------------------------------------------------------|---------------------------------------------------------|---------|-----------|----------|-----------|----------|---|-------|
|          | 7.73 | 11.8 | KYIETVLANAK                     | ITRAQ4plex@N-term;<br>ITRAQ4plex(K)@1;<br>Oxidation(N)@9;<br>ITRAQ4plex(K)@11                       | missed K-Y@1                                            | -0.2034 | 1696.8055 | 566.6091 | 1697.0089 | 566.6769 | 3 | 33.46 |
|          | 4.88 | 6.3  | LGTPALTR                        | ITRAQ4plex@N-term                                                                                   |                                                         | -0.0035 | 1072.6328 | 537.3237 | 1072.6362 | 537.3254 | 2 | 38.32 |
|          | 7.73 | 11.8 | LRGP                            | No ITRAQ4plex@N-term                                                                                | cleaved T-L@N-term; cleaved P-R@C-term;<br>missed R-G@2 | -0.0113 | 441.2587  | 442.2660 | 441.2700  | 442.2772 | 1 | 60.44 |
|          | 7.73 | 11.8 | NPPAVASGIR                      | ITRAQ4plex@N-term                                                                                   |                                                         | 0.0090  | 1124.6514 | 563.3329 | 1124.6424 | 563.3285 | 2 | 26.69 |
|          | 7.73 | 11.8 | QANM                            | Gln->pyro-Glu@N-term;<br>Deamidated(N)@3                                                            | cleaved A-Q@N-term; cleaved M-A@C-term                  | -0.0185 | 446.1286  | 447.1359 | 446.1471  | 447.1544 | 1 | 3.57  |
|          | 7.73 | 11.8 | TLAEVFK                         | ITRAQ4plex@N-term;<br>ITRAQ4plex(K)@8                                                               |                                                         | -0.0074 | 1193.7190 | 597.8668 | 1193.7263 | 597.8704 | 2 | 38.26 |
|          | 7.73 | 11.8 | VFPGIQGGPLMHVIAAK               | ITRAQ4plex@N-term;<br>ITRAQ4plex(K)@17                                                              |                                                         | -0.0147 | 2022.1545 | 675.0588 | 2022.1692 | 675.0637 | 3 | 35.02 |
|          | 4.88 | 6.3  | YAEGYPGK                        | ITRAQ4plex@N-term;<br>ITRAQ4plex(K)@8                                                               |                                                         | 0.0004  | 1171.6122 | 586.8134 | 1171.6117 | 586.8131 | 2 | 35.78 |
| LIC12285 |      |      |                                 |                                                                                                     |                                                         |         |           |          |           |          |   |       |
|          | 6    | 4.3  | AADVGADLVGK                     | ITRAQ4plex@N-term;<br>ITRAQ4plex(K)@11                                                              |                                                         | 0.0017  | 1302.7404 | 652.3774 | 1302.7387 | 652.3766 | 2 | 28.95 |
|          | 6    | 4.3  | AAVDMVEEVR                      | ITRAQ4plex@N-term                                                                                   |                                                         | 0.0048  | 1261.6506 | 631.8326 | 1261.6458 | 631.8302 | 2 | 29.76 |
|          | 6    | 4.3  | AFRVAFDSGAVMGF                  | ITRAQ4plex@N-term;<br>Deamidated(R)@3                                                               | cleaved F-G@C-term; missed R-V@3                        | 0.0104  | 1618.8040 | 810.4092 | 1618.7935 | 810.4041 | 2 | 51.85 |
|          | 6    | 4.3  | DRTDLDAAAGNTAAIGK               | ITRAQ4plex@N-term;<br>Deamidated(N)@11;<br>ITRAQ4plex(K)@18                                         | missed R-T@2                                            | 0.0917  | 2079.1606 | 694.0608 | 2079.0688 | 694.0302 | 3 | 42.02 |
|          | 6    | 4.3  | EIPGIMEGK                       | ITRAQ4plex@N-term;<br>ITRAQ4plex(K)@9                                                               |                                                         | -0.0244 | 1260.6748 | 631.3447 | 1260.6991 | 631.3568 | 2 | 30.01 |
|          | 6    | 4.3  | LIFK                            | ITRAQ4plex@N-term;<br>ITRAQ4plex(K)@4                                                               | cleaved G-L@N-term                                      | 0.0065  | 807.5527  | 404.7836 | 807.5462  | 404.7804 | 2 | 39.59 |
| LIC12211 |      |      |                                 |                                                                                                     |                                                         |         |           |          |           |          |   |       |
|          | 2.02 | 12.3 | ISAVYK                          | ITRAQ4plex@N-term;<br>ITRAQ4plex(K)@6                                                               |                                                         | -0.0097 | 967.5850  | 484.7997 | 967.5946  | 484.8046 | 2 | 38.21 |
|          | 2.02 | 12.3 | ISAVYKNGVNLTLPK                 | ITRAQ4plex@N-term;<br>ITRAQ4plex(K)@6;<br>Deamidated(N)@7;<br>ITRAQ4plex(K)@16                      | missed K-N@6                                            | -0.0016 | 2162.3022 | 721.7747 | 2162.3040 | 721.7753 | 3 | 53.61 |
|          | 4.44 | 24.6 | ISGK                            | No ITRAQ4plex@N-term;<br>ITRAQ4plex(K)@4                                                            | cleaved I-I@N-term                                      | -0.0413 | 547.3039  | 548.3112 | 547.3451  | 548.3524 | 1 | 41.87 |
|          | 4.44 | 24.6 | NGVNLTLPK                       | ITRAQ4plex@N-term;<br>Deamidated(N)@1;<br>ITRAQ4plex(K)@10                                          |                                                         | -0.0044 | 1356.8176 | 679.4161 | 1356.8220 | 679.4183 | 2 | 32.40 |
|          | 2.02 | 12.3 | SAVYK                           | ITRAQ4plex@N-term;<br>ITRAQ4plex(K)@5                                                               | cleaved I-S@N-term                                      | -0.0215 | 854.4891  | 428.2518 | 854.5105  | 428.2625 | 2 | 41.97 |
|          | 4.44 | 24.6 | TFTLTSEVEDR                     | ITRAQ4plex@N-term                                                                                   |                                                         | 0.0133  | 1569.7778 | 785.8962 | 1569.7644 | 785.8895 | 2 | 59.32 |
|          | 4.44 | 24.6 | VDIYSDEENIYLLADLP<br>GVEEK      | ITRAQ4plex@N-term;<br>ITRAQ4plex(K)@22                                                              |                                                         | -0.0425 | 2811.3884 | 938.1368 | 2811.4310 | 938.1509 | 3 | 49.26 |
| LIC12113 |      |      |                                 |                                                                                                     |                                                         |         |           |          |           |          |   |       |
|          | 4    | 20.9 | EFLINQILR                       | ITRAQ4plex@N-term                                                                                   |                                                         | -0.0020 | 1402.8035 | 702.4090 | 1402.8054 | 702.4100 | 2 | 33.26 |
|          | 4    | 20.9 | ELTT                            | Glu->pyro-Glu@N-term                                                                                | cleaved Y-E@N-term; cleaved T-I@C-term                  | 0.0102  | 444.2322  | 445.2395 | 444.2220  | 445.2293 | 1 | 59.77 |
|          | 4    | 20.9 | ELTTITRVSSREVAK                 | ITRAQ4plex@N-term;<br>Deamidated(R)@7;<br>ITRAQ4plex(K)@15                                          | cleaved Y-E@N-term; missed R-V@7;<br>missed R-E@11      | -0.0377 | 1978.0925 | 660.3715 | 1978.1302 | 660.3840 | 3 | 29.89 |
|          | 4    | 20.9 | NYELTTITR                       | ITRAQ4plex@N-term                                                                                   |                                                         | -0.0016 | 1253.6721 | 627.8433 | 1253.6738 | 627.8442 | 2 | 29.40 |
|          | 4    | 20.9 | TTITRVSSR                       | ITRAQ4plex@N-term                                                                                   | cleaved L-T@N-term; missed R-V@5                        | -0.0545 | 1163.6200 | 582.8173 | 1163.6744 | 582.8445 | 2 | 29.51 |
|          | 4    | 20.9 | YELTTITRVSSR                    | No ITRAQ4plex@N-term;<br>Deamidated(R)@12                                                           | cleaved N-Y@N-term; missed R-V@8                        | 0.0371  | 1425.7834 | 476.2684 | 1425.7464 | 476.2561 | 3 | 29.06 |
| LIC12111 |      |      |                                 |                                                                                                     |                                                         |         |           |          |           |          |   |       |
|          | 3.92 | 8.7  | FTADPELAK                       | ITRAQ4plex@N-term;<br>ITRAQ4plex(K)@9                                                               |                                                         | 0.0141  | 1278.7205 | 640.3675 | 1278.7063 | 640.3604 | 2 | 28.90 |
|          | 3.92 | 8.7  | LERFITNR                        | ITRAQ4plex@N-term;<br>Oxidation(F)@4                                                                | cleaved L-L@N-term; missed R-F@3                        | -0.0458 | 1207.6337 | 403.5518 | 1207.6795 | 403.5671 | 3 | 28.68 |
|          | 3.92 | 8.7  | NIELLERFITNR                    | ITRAQ4plex@N-term;<br>Deamidated(R)@7                                                               | missed R-F@7                                            | 0.1153  | 1662.0377 | 555.0198 | 1661.9223 | 554.9814 | 3 | 33.44 |
|          | 3.92 | 8.7  | RITGTSARYQORVLAR                | No ITRAQ4plex@N-term                                                                                | missed R-I@1; missed R-Y@8; missed R-V@11               | -0.0842 | 1746.9124 | 583.3114 | 1746.9965 | 583.3395 | 3 | 46.69 |
|          | 3.92 | 8.7  | SENEIKEER                       | ITRAQ4plex@N-term;<br>ITRAQ4plex(K)@6                                                               | cleaved M-S@N-term                                      | -0.0385 | 1420.7017 | 474.5745 | 1420.7402 | 474.5873 | 3 | 27.10 |
|          | 3.92 | 8.7  | SIGLLPYK                        | ITRAQ4plex@N-term;<br>ITRAQ4plex(K)@8                                                               |                                                         | -0.0081 | 1177.7234 | 589.8690 | 1177.7314 | 589.8730 | 2 | 31.40 |
| LIC12110 |      |      |                                 |                                                                                                     |                                                         |         |           |          |           |          |   |       |
|          | 2.05 | 10.1 | DVINLGDAGDLKEVAD<br>GYARNFLFPKR | ITRAQ4plex@N-term;<br>ITRAQ4plex(K)@12;<br>Oxidation(Y)@18;<br>Oxidation(R)@20;<br>ITRAQ4plex(K)@26 | missed R-N@20; missed K-R@26                            | -0.0296 | 3456.8071 | 865.2090 | 3456.8367 | 865.2164 | 4 | 53.82 |



|          |      |      |                                 |                                                                               |                                                    |         |           |          |           |          |   |       |
|----------|------|------|---------------------------------|-------------------------------------------------------------------------------|----------------------------------------------------|---------|-----------|----------|-----------|----------|---|-------|
|          | 2.05 | 10.1 | ILQKDVINLGDAGDLK                | ITRAQ4plex@N-term;<br>ITRAQ4plex(K)@4;<br>ITRAQ4plex(K)@16                    | cleaved V-I@N-term                                 | -0.1391 | 2143.1187 | 715.3802 | 2143.2578 | 715.4265 | 3 | 39.32 |
|          | 2.89 | 10.1 | KIEIAEPIR                       | ITRAQ4plex@N-term;<br>ITRAQ4plex(K)@1                                         | missed K-I@1                                       | 0.0059  | 1355.8440 | 452.9553 | 1355.8380 | 452.9533 | 3 | 44.09 |
|          | 2.05 | 10.1 | LAEGIQPTITLHVK                  | ITRAQ4plex@N-term;<br>ITRAQ4plex(K)@14                                        |                                                    | -1.0442 | 1806.0370 | 603.0196 | 1807.0811 | 603.3676 | 3 | 32.86 |
|          | 2.05 | 10.1 | LFGAVTPIDVASILK                 | ITRAQ4plex@N-term;<br>ITRAQ4plex(K)@15                                        |                                                    | -0.0075 | 1831.0988 | 916.5566 | 1831.1063 | 916.5604 | 2 | 38.07 |
|          | 2.05 | 10.1 | NFLFPK                          | ITRAQ4plex@N-term;<br>ITRAQ4plex(K)@6                                         |                                                    | -0.0020 | 1052.6243 | 527.3194 | 1052.6262 | 527.3204 | 2 | 43.60 |
| LIC11980 |      |      |                                 |                                                                               |                                                    |         |           |          |           |          |   |       |
|          | 2    | 21.1 | DLGDGIRSFRR                     | ITRAQ4plex@N-term;<br>Oxidation(F)@9;<br>Deamidated(R)@10                     | missed R-S@7                                       | 0.0134  | 1295.6726 | 648.8436 | 1295.6592 | 648.8369 | 2 | 32.59 |
|          | 2    | 21.1 | LFGGK                           | ITRAQ4plex@N-term;<br>ITRAQ4plex(K)@5                                         | cleaved L-L@N-term                                 | 0.0016  | 808.5067  | 405.2606 | 808.5051  | 405.2598 | 2 | 29.09 |
|          | 2    | 21.1 | SLTGESDDSSQIQISEQER             | ITRAQ4plex@N-term                                                             |                                                    | -0.0227 | 2267.0044 | 756.6754 | 2267.0271 | 756.6830 | 3 | 26.65 |
| LIC11954 |      |      |                                 |                                                                               |                                                    |         |           |          |           |          |   |       |
|          | 2    | 3.7  | DVLLGLDAASSEFYDK                | ITRAQ4plex@N-term;<br>ITRAQ4plex(K)@16                                        |                                                    | 0.0148  | 2030.0601 | 677.6940 | 2030.0452 | 677.6890 | 3 | 49.19 |
|          | 2.44 | 1.9  | ELLR                            | ITRAQ4plex@N-term                                                             | cleaved N-E@N-term                                 | 0.0274  | 673.4519  | 674.4592 | 673.4245  | 674.4317 | 1 | 58.31 |
|          | 2    | 3.7  | GSLSETLSSEIMAK                  | No ITRAQ4plex@N-term;<br>ITRAQ4plex(K)@14                                     | cleaved I-G@N-term                                 | -0.0476 | 1595.7722 | 798.8934 | 1595.8198 | 798.9172 | 2 | 55.87 |
|          | 2    | 3.7  | IQAREIMDSR                      | ITRAQ4plex@N-term;<br>Deamidated(R)@4;<br>ITRAQ4plex(S)@9                     | missed R-E@4                                       | 0.0233  | 1506.8301 | 503.2840 | 1506.8068 | 503.2762 | 3 | 28.05 |
|          | 2.44 | 1.9  | MGAEIFHSLK                      | ITRAQ4plex@N-term;<br>ITRAQ4plex(K)@10                                        |                                                    | 0.0108  | 1419.7896 | 474.2704 | 1419.7788 | 474.2669 | 3 | 50.56 |
|          | 2    | 3.7  | SHHSQIQIQIAR                    | ITRAQ4plex@N-term;<br>Deamidated(O)@7;<br>ITRAQ4plex(K)@8;<br>Oxidation(R)@12 | cleaved M-S@N-term; missed K-I@8                   | -0.0267 | 1736.9259 | 869.4702 | 1736.9525 | 869.4836 | 2 | 58.40 |
|          | 2.44 | 1.9  | YTNVVSHR                        | ITRAQ4plex@N-term                                                             |                                                    | 0.0002  | 1118.5957 | 560.3051 | 1118.5954 | 560.3050 | 2 | 35.75 |
| LIC11889 |      |      |                                 |                                                                               |                                                    |         |           |          |           |          |   |       |
|          | 2.92 | 3.2  | ADMGAYYNR                       | ITRAQ4plex@N-term                                                             |                                                    | 0.0061  | 1203.5526 | 602.7836 | 1203.5464 | 602.7805 | 2 | 37.31 |
|          | 2.92 | 3.2  | INHNL                           | ITRAQ4plex@N-term                                                             | cleaved I-I@N-term; cleaved N-L@C-term             | 0.0163  | 640.3578  | 641.3651 | 640.3415  | 641.3487 | 1 | 59.26 |
|          | 2.92 | 3.2  | INHNL SAVNAHR                   | No ITRAQ4plex@N-term;<br>Oxidation(N)@4;<br>Deamidated(N)@9                   | cleaved I-I@N-term                                 | 0.0050  | 1361.6851 | 681.8498 | 1361.6800 | 681.8473 | 2 | 41.74 |
|          | 2.92 | 3.2  | LFEGQFAR                        | ITRAQ4plex@N-term                                                             |                                                    | 0.0031  | 1110.5975 | 556.3060 | 1110.5944 | 556.3045 | 2 | 42.53 |
|          | 2.92 | 3.2  | LRTQINGLRQAER                   | ITRAQ4plex@N-term;<br>Deamidated(O)@10                                        | missed R-T@2; missed R-Q@9                         | 0.1158  | 1699.0768 | 567.3662 | 1698.9611 | 567.3276 | 3 | 45.39 |
|          | 2.92 | 3.2  | MIINHNL SAVNAHR                 | ITRAQ4plex@N-term;<br>Oxidation(H)@5                                          |                                                    | 0.0012  | 1748.9238 | 583.9819 | 1748.9226 | 583.9815 | 3 | 47.44 |
| LIC11840 |      |      |                                 |                                                                               |                                                    |         |           |          |           |          |   |       |
|          | 2.02 | 1.7  | ALDSLK                          | ITRAQ4plex@N-term;<br>ITRAQ4plex(K)@6                                         | cleaved I-A@N-term                                 | -0.0126 | 933.5613  | 467.7879 | 933.5739  | 467.7942 | 2 | 37.33 |
|          | 2.02 | 1.7  | EDIQGSIAHAR                     | No ITRAQ4plex@N-term;<br>Oxidation(H)@9                                       |                                                    | 0.0317  | 1211.6212 | 606.8179 | 1211.5895 | 606.8020 | 2 | 41.35 |
|          | 2.02 | 1.7  | ELGLSK                          | ITRAQ4plex@N-term;<br>ITRAQ4plex(K)@6                                         |                                                    | -0.0126 | 933.5613  | 467.7879 | 933.5739  | 467.7942 | 2 | 37.33 |
|          | 2.02 | 1.7  | ELIR                            | ITRAQ4plex@N-term                                                             | cleaved A-E@N-term                                 | 0.0274  | 673.4519  | 674.4592 | 673.4245  | 674.4317 | 1 | 58.31 |
|          | 2.02 | 1.7  | GLPSTYNRDLQEDKLALFDSI           | ITRAQ4plex@N-term;<br>Oxidation(D)@13;<br>ITRAQ4plex(K)@14                    | cleaved I-E@C-term; missed R-D@8;<br>missed K-L@14 | -0.0082 | 2698.3977 | 675.6067 | 2698.4057 | 675.6087 | 4 | 36.12 |
|          | 2.02 | 1.7  | ISYGGTSK                        | ITRAQ4plex@N-term;<br>ITRAQ4plex(K)@8                                         |                                                    | 0.0027  | 1099.6145 | 550.8145 | 1099.6117 | 550.8131 | 2 | 34.97 |
|          | 2.02 | 1.7  | LDLSK                           | ITRAQ4plex@N-term;<br>Oxidation(D)@2;<br>ITRAQ4plex(K)@5                      | cleaved A-L@N-term                                 | 0.0691  | 878.6008  | 440.3077 | 878.5317  | 440.2731 | 2 | 43.63 |
|          | 2.02 | 1.7  | LSADK                           | ITRAQ4plex@N-term;<br>ITRAQ4plex(K)@5                                         | cleaved S-L@N-term                                 | 0.0117  | 820.5016  | 411.2581 | 820.4898  | 411.2522 | 2 | 40.92 |
|          | 2.02 | 1.7  | LVMLK                           | ITRAQ4plex@N-term;<br>ITRAQ4plex(K)@5                                         | cleaved L-L@N-term                                 | 0.0145  | 890.6012  | 446.3079 | 890.5867  | 446.3006 | 2 | 42.74 |
|          | 2.02 | 1.7  | VSPNSMDGVSSRDHILEFLFACTQLMIHVSR | ITRAQ4plex@N-term;<br>Deamidated(N)@4;<br>Methylthio(C)@22                    | missed R-D@12                                      | 0.1854  | 3679.9595 | 920.9971 | 3679.7741 | 920.9508 | 4 | 56.20 |
| LIC11822 |      |      |                                 |                                                                               |                                                    |         |           |          |           |          |   |       |
|          | 3.22 | 4.3  | AAAATVK                         | ITRAQ4plex@N-term;<br>ITRAQ4plex(K)@7                                         |                                                    | -0.0781 | 918.4961  | 460.2553 | 918.5742  | 460.2944 | 2 | 44.35 |
|          | 3.22 | 4.3  | DILAIIGK                        | ITRAQ4plex@N-term;<br>ITRAQ4plex(K)@9                                         |                                                    | -0.0089 | 1242.8066 | 622.4106 | 1242.8155 | 622.4150 | 2 | 51.67 |
|          | 3.22 | 4.3  | LAIIGK                          | ITRAQ4plex@N-term;<br>ITRAQ4plex(K)@6                                         | cleaved I-L@N-term                                 | 0.0074  | 901.6279  | 451.8212 | 901.6204  | 451.8175 | 2 | 41.54 |

|          |       |      |                                 |                                                                                                                                              |                                        |         |           |           |           |           |   |       |
|----------|-------|------|---------------------------------|----------------------------------------------------------------------------------------------------------------------------------------------|----------------------------------------|---------|-----------|-----------|-----------|-----------|---|-------|
|          | 3.22  | 4.3  | VQAIIVPGSGR                     | ITRAQ4plex@N-term                                                                                                                            |                                        | -0.0098 | 1225.7167 | 613.8656  | 1225.7265 | 613.8705  | 2 | 39.72 |
| LIC11821 |       |      |                                 |                                                                                                                                              |                                        |         |           |           |           |           |   |       |
|          | 4     | 21.8 | DAGTK                           | No ITRAQ4plex@N-term;<br>ITRAQ4plex(K)@5                                                                                                     | cleaved D-D@N-term                     | 0.0364  | 634.3772  | 635.3845  | 634.3408  | 635.3481  | 1 | 54.37 |
|          | 4     | 21.8 | MKPFTILNGIAALLDRP<br>NVDTDQIIPK | ITRAQ4plex@N-term;<br>ITRAQ4plex(K)@2;<br>Deamidated(N)@8;<br>Oxidation(P)@17;<br>Deamidated(N)@18;<br>Dehydrated(D)@20;<br>ITRAQ4plex(K)@27 |                                        | -0.0498 | 3424.8508 | 857.2200  | 3424.9005 | 857.2324  | 4 | 40.58 |
|          | 4     | 21.8 | SEEVEELFHLVSTNVG<br>AK          | ITRAQ4plex@N-term;<br>ITRAQ4plex(K)@18                                                                                                       |                                        | -0.0211 | 2275.1729 | 759.3983  | 2275.1940 | 759.4053  | 3 | 37.43 |
|          | 4     | 21.8 | VIVDLDKQTVTGPTGK                | ITRAQ4plex@N-term;<br>ITRAQ4plex(K)@7;<br>Deamidated(Q)@8;<br>Oxidation(P)@13;<br>ITRAQ4plex(K)@16                                           | missed K-Q@7                           | -0.0037 | 2119.2065 | 707.4094  | 2119.2102 | 707.4107  | 3 | 39.25 |
| LIC11781 |       |      |                                 |                                                                                                                                              |                                        |         |           |           |           |           |   |       |
|          | 16.01 | 30.7 | AGVPPVK                         | ITRAQ4plex@N-term;<br>ITRAQ4plex(K)@6                                                                                                        |                                        | 0.0082  | 857.5661  | 429.7903  | 857.5578  | 429.7862  | 2 | 25.54 |
|          | 16.01 | 30.7 | EINWALLVGSVPR                   | ITRAQ4plex@N-term                                                                                                                            |                                        | -0.0417 | 1596.8693 | 799.4419  | 1596.9110 | 799.4628  | 2 | 38.98 |
|          | 16.01 | 30.7 | EINWALLVGSVPRK                  | Glu->pyro-Glu@N-term;<br>Oxidation(N)@3;<br>ITRAQ4plex(K)@14                                                                                 | missed R-K@13                          | 0.0025  | 1722.9928 | 575.3382  | 1722.9903 | 575.3374  | 3 | 49.93 |
|          | 16.01 | 30.7 | EVTHLGIWGNHSATQ<br>YPDFYNTK     | ITRAQ4plex@N-term;<br>ITRAQ4plex(K)@23                                                                                                       |                                        | 0.0125  | 2965.4727 | 742.3754  | 2965.4602 | 742.3723  | 4 | 36.79 |
|          | 16.01 | 30.7 | GASSAASAANGVVDV<br>VR           | ITRAQ4plex@N-term;<br>Deamidated(N)@10                                                                                                       |                                        | -0.0084 | 1676.8367 | 839.4256  | 1676.8451 | 839.4298  | 2 | 26.86 |
|          | 16.01 | 30.7 | GLIFGFPLK                       | ITRAQ4plex@N-term;<br>ITRAQ4plex(K)@9                                                                                                        |                                        | 0.0123  | 1278.8068 | 640.4106  | 1278.7944 | 640.4045  | 2 | 42.56 |
|          | 16.01 | 30.7 | GVIMELEDCAFPLLQK                | ITRAQ4plex@N-term;<br>Methylthio(C)@9;<br>ITRAQ4plex(K)@16                                                                                   |                                        | 0.0370  | 2139.1392 | 1070.5770 | 2139.1022 | 1070.5584 | 2 | 3.53  |
|          | 16.01 | 30.7 | IITP                            | ITRAQ4plex@N-term                                                                                                                            | cleaved G-I@N-term; cleaved P-T@C-term | -0.0291 | 586.3521  | 587.3594  | 586.3812  | 587.3885  | 1 | 54.24 |
|          | 16.01 | 30.7 | INGGIFVNQGK                     | ITRAQ4plex@N-term;<br>Deamidated(N)@2;<br>ITRAQ4plex(K)@11                                                                                   |                                        | 0.0261  | 1434.8335 | 718.4240  | 1434.8074 | 718.4110  | 2 | 31.67 |
|          | 16.01 | 30.7 | ITHEELVSR                       | ITRAQ4plex@N-term                                                                                                                            |                                        | -0.0076 | 1355.7091 | 452.9103  | 1355.7167 | 452.9128  | 3 | 27.70 |
|          | 16.01 | 30.7 | ITHEELVSRNEVK                   | No ITRAQ4plex@N-term;<br>Deamidated(R)@10;<br>ITRAQ4plex(K)@14                                                                               | missed R-N@10                          | 0.0514  | 1827.0010 | 914.5078  | 1826.9496 | 914.4821  | 2 | 52.22 |
|          | 16.01 | 30.7 | KVEIQGISLNDFAK                  | ITRAQ4plex@N-term;<br>ITRAQ4plex(K)@1;<br>Deamidated(N)@11;<br>ITRAQ4plex(K)@15                                                              | missed K-V@1                           | -0.1538 | 2107.0718 | 703.3645  | 2107.2254 | 703.4158  | 3 | 43.98 |
|          | 16.01 | 30.7 | SSAASAANGVVDVTR                 | ITRAQ4plex@N-term;<br>Deamidated(N)@8                                                                                                        | cleaved A-S@N-term                     | -0.0084 | 1548.7782 | 775.3964  | 1548.7865 | 775.4006  | 2 | 26.55 |
|          | 16.01 | 30.7 | VAVTGAAGQIGYSLLF<br>R           | ITRAQ4plex@N-term                                                                                                                            |                                        | 0.0076  | 1866.0562 | 934.0353  | 1866.0485 | 934.0315  | 2 | 60.51 |
|          | 16.01 | 30.7 | VEIQGISLNDFAKEK                 | ITRAQ4plex@N-term;<br>ITRAQ4plex(K)@14;<br>ITRAQ4plex(K)@16                                                                                  |                                        | 0.0102  | 2235.2942 | 746.1053  | 2235.2840 | 746.1019  | 3 | 36.27 |
|          | 16.01 | 30.7 | VGSVPR                          | ITRAQ4plex@N-term;<br>Deamidated(R)@6                                                                                                        | cleaved L-V@N-term                     | 0.0099  | 758.4507  | 759.4580  | 758.4408  | 759.4481  | 1 | 49.96 |
|          | 16.01 | 30.7 | VTVSSDLDTAFK                    | ITRAQ4plex@N-term;<br>ITRAQ4plex(K)@12                                                                                                       |                                        | 0.0115  | 1569.8608 | 785.9377  | 1569.8494 | 785.9320  | 2 | 59.29 |
| LIC11767 |       |      |                                 |                                                                                                                                              |                                        |         |           |           |           |           |   |       |
|          | 2     | 4.7  | EMQEKYPVISEVR                   | Glu->pyro-Glu@N-term;<br>Oxidation(M)@2;<br>Deamidated(Q)@3;<br>ITRAQ4plex(K)@5                                                              | missed K-Y@5                           | -0.0009 | 1749.8721 | 875.9433  | 1749.8729 | 875.9437  | 2 | 34.37 |
|          | 2     | 4.7  | GIEFIEPNNDALVAAF<br>ER          | ITRAQ4plex@N-term                                                                                                                            |                                        | 0.0027  | 2277.1426 | 760.0548  | 2277.1399 | 760.0539  | 3 | 38.50 |
| LIC11760 |       |      |                                 |                                                                                                                                              |                                        |         |           |           |           |           |   |       |
|          | 3.7   | 31.9 | AAIKDNGGSLGVLPK                 | ITRAQ4plex@N-term;<br>ITRAQ4plex(K)@4;<br>Deamidated(N)@6;<br>ITRAQ4plex(K)@16                                                               |                                        | 0.0197  | 1943.1614 | 648.7277  | 1943.1417 | 648.7212  | 3 | 45.36 |
|          | 3.7   | 31.9 | GTVSGNNVSHSHIK                  | CarbamyI@N-term;<br>Deamidated(N)@6;<br>ITRAQ4plex(K)@14                                                                                     |                                        | 0.0116  | 1623.8203 | 542.2807  | 1623.8087 | 542.2768  | 3 | 35.04 |
| LIC11745 |       |      |                                 |                                                                                                                                              |                                        |         |           |           |           |           |   |       |
|          | 9.71  | 18.9 | AEIEGDMGDSHMLQ<br>AR            | ITRAQ4plex@N-term                                                                                                                            |                                        | 0.0441  | 1959.9342 | 654.3187  | 1959.8900 | 654.3040  | 3 | 58.72 |

|          |      |                                                     |                                                                                       |                                                      |         |           |          |           |          |   |       |
|----------|------|-----------------------------------------------------|---------------------------------------------------------------------------------------|------------------------------------------------------|---------|-----------|----------|-----------|----------|---|-------|
| 9.71     | 18.9 | AEIEGDMGDSHMLQARLMSQALR                             | ITRAQ4plex@N-term; ITRAQ4plex(S)@10; Deamidated(Q)@15                                 | missed R-L@17                                        | 0.0913  | 2904.5049 | 969.1756 | 2904.4136 | 969.1451 | 3 | 52.62 |
| 3.6      | 7.4  | AKEDAPSVDDSK                                        | CarbamyI@N-term; ITRAQ4plex(K)@2; ITRAQ4plex(K)@12                                    |                                                      | 0.0034  | 1591.7968 | 796.9056 | 1591.7933 | 796.9039 | 2 | 33.97 |
| 3.6      | 7.4  | DLNSLPLLQENKK                                       | ITRAQ4plex@N-term; Deamidated(N)@12; ITRAQ4plex(K)@14; ITRAQ4plex(K)@15               | missed K-K@14                                        | -0.0074 | 2157.2295 | 720.0838 | 2157.2371 | 720.0863 | 3 | 49.04 |
| 9.71     | 18.9 | EDAPSVDDSKK                                         | ITRAQ4plex@N-term; ITRAQ4plex(K)@10; ITRAQ4plex(K)@11                                 | missed K-K@10                                        | -0.0358 | 1621.8168 | 541.6129 | 1621.8524 | 541.6248 | 3 | 26.75 |
| 9.71     | 18.9 | EGSLVDLGVK                                          | ITRAQ4plex@N-term; ITRAQ4plex(K)@10                                                   |                                                      | 0.0108  | 1303.7700 | 652.8923 | 1303.7591 | 652.8868 | 2 | 30.57 |
| 9.71     | 18.9 | EKEESVGNR                                           | ITRAQ4plex@N-term; ITRAQ4plex(K)@2                                                    |                                                      | -0.0500 | 1334.6534 | 445.8918 | 1334.7034 | 445.9084 | 3 | 26.08 |
| 9.71     | 18.9 | GGVAAFIDAEHALDPSYAK                                 | ITRAQ4plex@N-term; ITRAQ4plex(K)@19                                                   |                                                      | 0.0056  | 2219.1521 | 740.7247 | 2219.1466 | 740.7228 | 3 | 37.10 |
| 3.6      | 7.4  | GSIMKLGSDSAK                                        | No ITRAQ4plex@N-term; Oxidation(M)@4; ITRAQ4plex(K)@5; ITRAQ4plex(K)@12               | missed K-L@5                                         | -0.0426 | 1496.7687 | 749.3916 | 1496.8112 | 749.4129 | 2 | 33.70 |
| 9.71     | 18.9 | KLAIEQAMSQIEK                                       | ITRAQ4plex@N-term; ITRAQ4plex(K)@1; ITRAQ4plex(K)@13                                  | missed K-L@1                                         | 0.0093  | 1920.1172 | 641.0463 | 1920.1080 | 641.0433 | 3 | 35.99 |
| 9.71     | 18.9 | LGSDSAKQTVQVIPS<br>GSLDLIALGIGGYPIGR                | No ITRAQ4plex@N-term; ITRAQ4plex(K)@7; Oxidation(D)@21                                | missed K-Q@7                                         | -0.0417 | 3456.8169 | 865.2115 | 3456.8586 | 865.2219 | 4 | 62.61 |
| 9.71     | 18.9 | LMSQALRKL                                           | ITRAQ4plex@N-term; Oxidation(M)@2; ITRAQ4plex(K)@8                                    | cleaved T-G@C-term; missed R-K@7; missed K-L@8       | 0.0324  | 1463.9063 | 488.9760 | 1463.8738 | 488.9652 | 3 | 47.37 |
| 9.71     | 18.9 | MGESIMK                                             | ITRAQ4plex@N-term; Oxidation(M)@1; Oxidation(M)@6; ITRAQ4plex(K)@7                    |                                                      | 0.0742  | 1114.6348 | 558.3246 | 1114.5606 | 558.2876 | 2 | 39.22 |
| 9.71     | 18.9 | NNPEIALTENMVR                                       | ITRAQ4plex@N-term                                                                     |                                                      | -0.0141 | 1756.9122 | 879.4634 | 1756.9264 | 879.4705 | 2 | 43.49 |
| 3.6      | 7.4  | NQIR                                                | ITRAQ4plex@N-term                                                                     | cleaved I-N@N-term                                   | 0.0526  | 673.4519  | 674.4592 | 673.3993  | 674.4066 | 1 | 58.31 |
| 9.71     | 18.9 | NTEK                                                | No ITRAQ4plex@N-term; ITRAQ4plex(K)@4                                                 | cleaved Y-N@N-term                                   | 0.0042  | 634.3450  | 635.3523 | 634.3408  | 635.3481 | 1 | 37.78 |
| 9.71     | 18.9 | PIGR                                                | No ITRAQ4plex@N-term                                                                  | cleaved Y-P@N-term                                   | -0.0113 | 441.2587  | 442.2660 | 441.2700  | 442.2772 | 1 | 60.44 |
| LIC11726 |      |                                                     |                                                                                       |                                                      |         |           |          |           |          |   |       |
| 2        | 4.0  | DLKDYVR                                             | ITRAQ4plex@N-term; ITRAQ4plex(K)@3; ITRAQ4plex(Y)@5                                   | cleaved M-D@N-term                                   | -0.1394 | 1339.6432 | 447.5550 | 1339.7825 | 447.6014 | 3 | 27.79 |
| 2        | 4.0  | FDTTLRDGEQCPGAA<br>MTENEKLEIASQLATMK                | ITRAQ4plex@N-term; Methylthio(C)@11; ITRAQ4plex(K)@21; ITRAQ4plex(K)@32               | cleaved I-F@N-term; missed R-D@6; missed K-L@21      | -0.0112 | 3975.9304 | 994.9899 | 3975.9416 | 994.9927 | 4 | 41.84 |
| 2        | 4.0  | NKTQKTGSR                                           | ITRAQ4plex@N-term; ITRAQ4plex(K)@2; Deamidated(Q)@4; ITRAQ4plex(K)@5; ITRAQ4plex(S)@8 | missed K-T@2; missed K-T@5                           | -0.0588 | 1595.8854 | 532.9691 | 1595.9442 | 532.9887 | 3 | 31.99 |
| 2        | 4.0  | QIECTINGIGER                                        | ITRAQ4plex@N-term; Methylthio(C)@4; Deamidated(N)@7                                   |                                                      | 0.1554  | 1522.8795 | 762.4470 | 1522.7241 | 762.3694 | 2 | 55.20 |
| 2        | 4.0  | VDIIEAGFPVSSPVQF<br>QAVER                           | ITRAQ4plex@N-term                                                                     |                                                      | -0.0141 | 2431.2729 | 811.4316 | 2431.2869 | 811.4362 | 3 | 37.87 |
| LIC11701 |      |                                                     |                                                                                       |                                                      |         |           |          |           |          |   |       |
| 6.13     | 5.6  | AREP                                                | No ITRAQ4plex@N-term                                                                  | cleaved V-A@N-term; cleaved P-I@C-term; missed R-E@2 | 0.0199  | 471.2641  | 472.2714 | 471.2441  | 472.2514 | 1 | 41.08 |
| 6.03     | 5.6  | DIRNNR                                              | ITRAQ4plex@N-term; Oxidation(R)@3; Deamidated(N)@5                                    | missed R-N@3                                         | 0.0052  | 1076.5385 | 539.2765 | 1076.5332 | 539.2739 | 2 | 26.60 |
| 6.03     | 5.6  | IDASTEIHNAIR                                        | ITRAQ4plex@N-term                                                                     |                                                      | 0.0101  | 1595.8854 | 532.9691 | 1595.8753 | 532.9657 | 3 | 31.99 |
| 6.03     | 5.6  | IEETILSSILR                                         | ITRAQ4plex@N-term                                                                     | cleaved I-I@N-term                                   | 0.0145  | 1503.8776 | 752.9460 | 1503.8630 | 752.9388 | 2 | 57.19 |
| 6.13     | 5.6  | IGLIK                                               | ITRAQ4plex@N-term; ITRAQ4plex(K)@5                                                    | cleaved N-I@N-term                                   | 0.0086  | 830.5919  | 416.3032 | 830.5833  | 416.2989 | 2 | 39.82 |
| 6.13     | 5.6  | IISLKG                                              | ITRAQ4plex@N-term; ITRAQ4plex(K)@6                                                    |                                                      | -0.0212 | 917.5942  | 459.8044 | 917.6153  | 459.8149 | 2 | 44.22 |
| 6.03     | 5.6  | ILNSEKIDFFTLHEM<br>GIEVVEYTRNTLEPAS<br>TLVPKDDSKPAR | ITRAQ4plex@N-term; ITRAQ4plex(K)@6; ITRAQ4plex(K)@39; No ITRAQ4plex(K)@43             | missed K-I@6; missed R-N@27                          | -0.0691 | 5705.9175 | 951.9935 | 5705.9868 | 952.0051 | 6 | 45.23 |
| 6.13     | 5.6  | IISLKG                                              | ITRAQ4plex@N-term; ITRAQ4plex(K)@5                                                    | cleaved I-I@N-term                                   | 0.0044  | 804.5357  | 403.2751 | 804.5313  | 403.2729 | 2 | 38.14 |

|          |       |      |                                   |                                                                                   |                                                         |          |           |           |           |           |   |       |
|----------|-------|------|-----------------------------------|-----------------------------------------------------------------------------------|---------------------------------------------------------|----------|-----------|-----------|-----------|-----------|---|-------|
|          | 6.03  | 5.6  | LGWVPVQK                          | ITRAQ4plex@N-term;<br>ITRAQ4plex(K)@7                                             |                                                         | -0.0128  | 1114.6615 | 558.3380  | 1114.6742 | 558.3444  | 2 | 31.39 |
|          | 6.13  | 5.6  | LRHPSR                            | ITRAQ4plex@N-term;<br>Deamidated(R)@2;<br>Oxidation(H)@3                          | missed R-H@2                                            | 0.0010   | 925.5226  | 463.7686  | 925.5215  | 463.7681  | 2 | 44.57 |
|          | 6.03  | 5.6  | MGVNIDEVREVIKDIR<br>NNER          | No ITRAQ4plex@N-term;<br>Deamidated(N)@4;<br>Deamidated(R)@9;<br>ITRAQ4plex(K)@13 | missed R-E@9; missed R-N@16                             | -0.0128  | 2544.2961 | 849.1060  | 2544.3088 | 849.1102  | 3 | 48.05 |
|          | 6.03  | 5.6  | QAITRAISDQAR                      | ITRAQ4plex@N-term;<br>Deamidated(Q)@1                                             | missed R-A@5                                            | -0.0391  | 1473.7631 | 737.8888  | 1473.8021 | 737.9083  | 2 | 26.90 |
|          | 6.13  | 5.6  | QEGN                              | Gln->pyro-Glu@N-term                                                              | cleaved I-Q@N-term; cleaved N-I@C-term                  | 0.1861   | 429.3357  | 430.3430  | 429.1496  | 430.1569  | 1 | 58.43 |
|          | 6.03  | 5.6  | QVLHTLTPAR                        | Gln->pyro-Glu@N-term                                                              |                                                         | -0.0014  | 1016.5753 | 509.2949  | 1016.5767 | 509.2956  | 2 | 30.16 |
|          | 6.03  | 5.6  | VPVHMIEQVVK                       | ITRAQ4plex@N-term;<br>ITRAQ4plex(K)@11                                            |                                                         | -0.0051  | 1580.8901 | 527.9706  | 1580.8952 | 527.9723  | 3 | 30.70 |
| LIC11652 |       |      |                                   |                                                                                   |                                                         |          |           |           |           |           |   |       |
|          | 10.44 | 32.7 | AGATFISPF                         | ITRAQ4plex@N-term                                                                 | cleaved F-I@C-term                                      | -0.0059  | 1053.5558 | 527.7852  | 1053.5617 | 527.7881  | 2 | 43.79 |
|          | 10.44 | 32.7 | AGATFISPFIFGR                     | ITRAQ4plex@N-term                                                                 |                                                         | -0.0031  | 1379.7653 | 690.8899  | 1379.7683 | 690.8914  | 2 | 33.61 |
|          | 10.44 | 32.7 | EALELVEIAENVVIK                   | ITRAQ4plex@N-term;<br>Deamidated(N)@11;<br>ITRAQ4plex(K)@15                       |                                                         | -0.0381  | 1957.0845 | 653.3688  | 1957.1227 | 653.3815  | 3 | 48.06 |
|          | 10.44 | 32.7 | EIYDNYGYDTR                       | ITRAQ4plex@N-term                                                                 |                                                         | -0.0036  | 1551.6927 | 776.8536  | 1551.6963 | 776.8554  | 2 | 30.10 |
|          | 10.44 | 32.7 | GADCATMPHS AFLQL<br>FK            | ITRAQ4plex@N-term;<br>Methylthio(C)@4;<br>ITRAQ4plex(K)@17                        |                                                         | -0.0011  | 2170.0605 | 724.3608  | 2170.0617 | 724.3612  | 3 | 36.72 |
|          | 10.44 | 32.7 | GPIHLK                            | ITRAQ4plex@N-term;<br>ITRAQ4plex(K)@6                                             |                                                         | -0.0372  | 951.5738  | 476.7942  | 951.6109  | 476.8127  | 2 | 59.35 |
|          | 10.01 | 22.9 | GRSFK                             | ITRAQ4plex@N-term;<br>ITRAQ4plex(K)@5                                             | cleaved S-G@N-term; missed R-S@2                        | 0.0428   | 881.5754  | 441.7950  | 881.5327  | 441.7736  | 2 | 39.15 |
|          | 10.44 | 32.7 | GVTT                              | ITRAQ4plex@N-term                                                                 | cleaved D-G@N-term; cleaved T-N@C-term                  | 0.0149   | 520.3127  | 521.3200  | 520.2979  | 521.3051  | 1 | 50.50 |
|          | 10.44 | 32.7 | HPLTDIGLEK                        | ITRAQ4plex@N-term;<br>ITRAQ4plex(K)@10                                            |                                                         | 0.0021   | 1409.8143 | 470.9454  | 1409.8122 | 470.9447  | 3 | 31.08 |
|          | 10.44 | 32.7 | IRGP                              | No ITRAQ4plex@N-term                                                              | cleaved S-I@N-term; cleaved P-I@C-term;<br>missed R-G@2 | -0.0113  | 441.2587  | 442.2660  | 441.2700  | 442.2772  | 1 | 60.44 |
|          | 10.44 | 32.7 | MELYLDTANVDEIK                    | ITRAQ4plex@N-term;<br>ITRAQ4plex(K)@14                                            |                                                         | -0.9642  | 1940.0367 | 971.0256  | 1941.0009 | 971.5077  | 2 | 47.65 |
|          | 10.44 | 32.7 | NIPTNVTLCFSAPQAL<br>LAAK          | ITRAQ4plex@N-term;<br>Methylthio(C)@9;<br>ITRAQ4plex(K)@20                        |                                                         | 0.0077   | 2405.3132 | 802.7783  | 2405.3054 | 802.7758  | 3 | 37.82 |
|          | 10.44 | 32.7 | NVTLCFSAPQALLAAK<br>AGATFISPFIFGR | ITRAQ4plex@N-term;<br>Methylthio(C)@5;<br>ITRAQ4plex(K)@16                        | cleaved T-N@N-term; missed K-A@16                       | -13.0084 | 3184.7253 | 637.9523  | 3197.7337 | 640.5540  | 5 | 36.07 |
|          | 10.44 | 32.7 | SAFLQLFK                          | ITRAQ4plex@N-term;<br>Deamidated(Q)@5;<br>ITRAQ4plex(K)@8                         | cleaved H-S@N-term                                      | -0.0159  | 1241.7104 | 621.8625  | 1241.7263 | 621.8704  | 2 | 47.17 |
|          | 10.01 | 22.9 | SGRSFK                            | No ITRAQ4plex@N-term;<br>ITRAQ4plex(K)@6                                          | missed R-S@3                                            | 0.0218   | 824.4844  | 413.2495  | 824.4626  | 413.2386  | 2 | 41.44 |
|          | 10.01 | 22.9 | TVVELTK                           | ITRAQ4plex@N-term;<br>ITRAQ4plex(K)@7                                             |                                                         | 0.0023   | 1076.6708 | 539.3427  | 1076.6685 | 539.3415  | 2 | 38.83 |
|          | 10.44 | 32.7 | TVVELTKR                          | ITRAQ4plex@N-term;<br>ITRAQ4plex(K)@7                                             | missed K-R@7                                            | -0.0119  | 1232.7578 | 617.3862  | 1232.7696 | 617.3921  | 2 | 47.79 |
|          | 10.44 | 32.7 | VDDTSWDGMELISEIR                  | ITRAQ4plex@N-term                                                                 |                                                         | 0.0051   | 2008.9585 | 1005.4870 | 2008.9534 | 1005.4840 | 2 | 44.36 |
|          | 10.44 | 32.7 | VPLIPEGLK                         | ITRAQ4plex@N-term;<br>ITRAQ4plex(K)@9                                             |                                                         | -0.0261  | 1252.7738 | 627.3942  | 1252.7998 | 627.4072  | 2 | 31.88 |
|          | 10.44 | 32.7 | YLDTANVDEIK                       | ITRAQ4plex@N-term;<br>Oxidation(D)@8;<br>ITRAQ4plex(K)@11                         | cleaved L-Y@N-term                                      | 0.1005   | 1583.9291 | 528.9836  | 1583.8286 | 528.9502  | 3 | 34.70 |
| LIC11600 |       |      |                                   |                                                                                   |                                                         |          |           |           |           |           |   |       |
|          | 2     | 6.1  | ALYDHTNLSPK                       | ITRAQ4plex@N-term;<br>ITRAQ4plex(K)@11                                            |                                                         | 0.0121   | 1545.8516 | 516.2911  | 1545.8395 | 516.2871  | 3 | 40.97 |
|          | 2     | 6.1  | EWRTDRMLR                         | Glu->pyro-Glu@N-term;<br>Oxidation(W)@2;<br>Oxidation(M)@7                        | missed R-T@3; missed R-M@6                              | -0.0069  | 1275.6074 | 638.8110  | 1275.6142 | 638.8144  | 2 | 49.16 |
| LIC11590 |       |      |                                   |                                                                                   |                                                         |          |           |           |           |           |   |       |
|          | 2     | 16.8 | ISFEDALMELEQIAEK                  | ITRAQ4plex@N-term;<br>ITRAQ4plex(K)@16                                            |                                                         | 0.0105   | 2153.1274 | 718.7164  | 2153.1170 | 718.7129  | 3 | 41.31 |
| LIC11555 |       |      |                                   |                                                                                   |                                                         |          |           |           |           |           |   |       |
|          | 2.01  | 12.3 | FVDIVGHYHPAQIK                    | ITRAQ4plex@N-term;<br>ITRAQ4plex(K)@14                                            |                                                         | -0.0108  | 1911.0503 | 638.0240  | 1911.0610 | 638.0276  | 3 | 37.64 |
|          | 2.01  | 12.3 | IIHSFFGGYK                        | ITRAQ4plex@N-term;<br>ITRAQ4plex(K)@10                                            |                                                         | 0.0139   | 1455.8257 | 486.2825  | 1455.8118 | 486.2779  | 3 | 43.19 |
|          | 2.01  | 12.3 | ILTWLK                            | ITRAQ4plex@N-term;<br>ITRAQ4plex(K)@6                                             |                                                         | -0.0173  | 1060.6715 | 531.3430  | 1060.6888 | 531.3517  | 2 | 41.40 |

|          |      |      |                            |                                                                               |                                                |         |           |          |           |          |   |       |
|----------|------|------|----------------------------|-------------------------------------------------------------------------------|------------------------------------------------|---------|-----------|----------|-----------|----------|---|-------|
|          | 2.01 | 12.3 | NGAQTGTVLNLFK              | ITRAQ4plex@N-term;<br>Deamidated(N)@1;<br>Oxidation(F)@5;<br>ITRAQ4plex(K)@14 |                                                | 0.0843  | 1764.0505 | 589.0241 | 1763.9661 | 588.9960 | 3 | 41.73 |
|          | 2.01 | 12.3 | VKLR                       | ITRAQ4plex@N-term;<br>ITRAQ4plex(K)@2                                         | cleaved L-V@N-term; missed K-L@2               | -0.0242 | 802.5391  | 803.5463 | 802.5632  | 803.5705 | 1 | 56.76 |
| LIC11546 |      |      |                            |                                                                               |                                                |         |           |          |           |          |   |       |
|          | 2    | 5.9  | GHRLVADDMVEIRR             | ITRAQ4plex@N-term;<br>Deamidated(R)@3                                         | missed R-L@3; missed R-R@13                    | -0.0293 | 1810.9301 | 906.4723 | 1810.9594 | 906.4870 | 2 | 8.52  |
|          | 2    | 5.9  | IFGK                       | ITRAQ4plex@N-term;<br>ITRAQ4plex(K)@4                                         | cleaved Q-I@N-term                             | 0.0153  | 751.4989  | 752.5062 | 751.4836  | 752.4909 | 1 | 56.22 |
|          | 2    | 5.9  | IQIFGK                     | No ITRAQ4plex@N-term;<br>Deamidated(Q)@2;<br>ITRAQ4plex(K)@6                  |                                                | 0.0274  | 849.5356  | 425.7751 | 849.5082  | 425.7614 | 2 | 30.19 |
|          | 2    | 5.9  | NIPIIVETAAMNQRRLR          | ITRAQ4plex@N-term;<br>Oxidation(F)@3;<br>Oxidation(R)@16                      | missed R-L@14                                  | -0.0912 | 2014.0203 | 672.3474 | 2014.1115 | 672.3778 | 3 | 58.22 |
|          | 2    | 5.9  | QIFG                       | Gln->pyro-Glu@N-term                                                          | cleaved I-Q@N-term; cleaved G-K@C-term         | 0.0361  | 446.2526  | 447.2599 | 446.2165  | 447.2238 | 1 | 6.97  |
|          | 2    | 5.9  | SLAPRTRMRHGV               | ITRAQ4plex@N-term                                                             | cleaved L-I@C-term; missed R-T@5; missed R-H@8 | -0.0352 | 1480.8066 | 494.6095 | 1480.8418 | 494.6212 | 3 | 29.39 |
|          | 2    | 5.9  | TGLENPTEELLGVQIP<br>LIR    | ITRAQ4plex@N-term                                                             |                                                | -0.0069 | 2235.2529 | 746.0916 | 2235.2596 | 746.0938 | 3 | 39.51 |
| LIC11541 |      |      |                            |                                                                               |                                                |         |           |          |           |          |   |       |
|          | 2.02 | 3.8  | IPYIFK                     | ITRAQ4plex@N-term;<br>ITRAQ4plex(K)@6                                         |                                                | 0.0024  | 1067.6647 | 534.8396 | 1067.6623 | 534.8384 | 2 | 46.49 |
|          | 2.02 | 3.8  | KGQFLPADTR                 | ITRAQ4plex@N-term;<br>ITRAQ4plex(K)@1                                         | missed K-G@1                                   | 0.0054  | 1490.8502 | 497.9574 | 1490.8449 | 497.9556 | 3 | 41.18 |
|          | 2.02 | 3.8  | LAPADTR                    | ITRAQ4plex@N-term                                                             | cleaved F-L@N-term                             | 0.0269  | 886.5264  | 444.2704 | 886.4994  | 444.2570 | 2 | 40.70 |
| LIC11511 |      |      |                            |                                                                               |                                                |         |           |          |           |          |   |       |
|          | 2    | 5.6  | DTMRHAEGVGLAAPQ<br>IGILK   | ITRAQ4plex@N-term;<br>Deamidated(Q)@15;<br>ITRAQ4plex(K)@20                   | cleaved F-D@N-term; missed R-H@4               | -0.0458 | 2365.2573 | 592.3216 | 2365.3031 | 592.3331 | 4 | 37.10 |
|          | 2    | 5.6  | GYVERPNQIR                 | ITRAQ4plex@N-term                                                             |                                                | -0.0170 | 1374.7321 | 459.2513 | 1374.7490 | 459.2569 | 3 | 27.24 |
|          | 2    | 5.6  | IGILK                      | ITRAQ4plex@N-term;<br>ITRAQ4plex(K)@5                                         | cleaved Q-I@N-term                             | 0.0086  | 830.5919  | 416.3032 | 830.5833  | 416.2989 | 2 | 39.82 |
|          | 2    | 5.6  | ILNP                       | No ITRAQ4plex@N-term;<br>Deamidated(N)@3                                      | cleaved I-H@N-term; cleaved P-V@C-term         | 0.0110  | 456.2694  | 457.2766 | 456.2584  | 457.2657 | 1 | 56.48 |
|          | 2    | 5.6  | IVVV                       | No ITRAQ4plex@N-term                                                          | cleaved Q-I@N-term; cleaved V-G@C-term         | 0.0318  | 428.3317  | 429.3389 | 428.2999  | 429.3071 | 1 | 58.52 |
|          | 2    | 5.6  | LVVDR                      | ITRAQ4plex@N-term                                                             | cleaved L-L@N-term                             | 0.0521  | 808.5086  | 405.2616 | 808.4565  | 405.2355 | 2 | 39.36 |
|          | 2    | 5.6  | VVGS                       | ITRAQ4plex@N-term                                                             | cleaved V-V@N-term; cleaved S-E@C-term         | -0.0028 | 504.3002  | 505.3075 | 504.3029  | 505.3102 | 1 | 56.17 |
| LIC11479 |      |      |                            |                                                                               |                                                |         |           |          |           |          |   |       |
|          | 2    | 6.4  | EHIDFLK                    | ITRAQ4plex@N-term;<br>ITRAQ4plex(K)@7                                         |                                                | 0.0049  | 1188.6796 | 595.3470 | 1188.6746 | 595.3446 | 2 | 31.99 |
|          | 2    | 6.4  | LNDMDLEGMTLTVEG<br>KGGRR   | ITRAQ4plex@N-term;<br>ITRAQ4plex(K)@16                                        | missed K-G@16; missed R-Q@19                   | 0.0575  | 2607.3928 | 870.1382 | 2607.3352 | 870.1190 | 3 | 42.26 |
|          | 2    | 6.4  | LVPFGEK                    | ITRAQ4plex@N-term;<br>Oxidation(F)@4;<br>ITRAQ4plex(K)@7                      |                                                | -0.0346 | 1092.6077 | 547.3111 | 1092.6423 | 547.3284 | 2 | 29.83 |
|          | 2    | 6.4  | SIPDYLTDIEIEELFAS<br>IK    | ITRAQ4plex@N-term;<br>ITRAQ4plex(K)@19                                        |                                                | 0.0060  | 2498.3096 | 833.7772 | 2498.3036 | 833.7751 | 3 | 39.79 |
|          | 2    | 6.4  | TVECK                      | ITRAQ4plex@N-term;<br>ITRAQ4plex(K)@5                                         | cleaved L-T@N-term                             | -0.0767 | 820.4131  | 821.4203 | 820.4898  | 821.4971 | 1 | 14.44 |
|          | 2    | 6.4  | VQADDIMRFLNEEK             | ITRAQ4plex@N-term;<br>Deamidated(Q)@2;<br>Oxidation(M)@7;<br>ITRAQ4plex(K)@14 | missed R-F@8                                   | -0.0231 | 2011.9897 | 671.6705 | 2012.0128 | 671.6782 | 3 | 27.41 |
| LIC11417 |      |      |                            |                                                                               |                                                |         |           |          |           |          |   |       |
|          | 4    | 17.7 | DTERNFYMTADEAK             | ITRAQ4plex@N-term;<br>Deamidated(N)@5;<br>ITRAQ4plex(K)@14                    | missed R-N@4                                   | 0.0440  | 1978.9626 | 660.6615 | 1978.9186 | 660.6468 | 3 | 25.19 |
|          | 4    | 17.7 | IMMHQPMGGATGQA<br>SDIEIQAR | ITRAQ4plex@N-term                                                             |                                                | 0.0241  | 2485.2239 | 829.4152 | 2485.1998 | 829.4072 | 3 | 59.08 |
|          | 4    | 17.7 | NYGIIDTVIQIDR              | ITRAQ4plex@N-term                                                             |                                                | -0.0299 | 1662.8763 | 832.4454 | 1662.9063 | 832.4604 | 2 | 53.30 |
|          | 2.92 | 6.1  | SVIPYVIEQTSR               | ITRAQ4plex@N-term                                                             | cleaved M-S@N-term                             | -0.0231 | 1534.8246 | 768.4196 | 1534.8477 | 768.4311 | 2 | 44.52 |
|          | 2.92 | 6.1  | SYDIFSR                    | ITRAQ4plex@N-term                                                             |                                                | 0.0112  | 1030.5317 | 516.2731 | 1030.5205 | 516.2675 | 2 | 42.11 |
|          | 2.92 | 6.1  | VIPYVIEQTSR                | ITRAQ4plex@N-term;<br>Oxidation(P)@3                                          | cleaved S-V@N-term                             | 0.0314  | 1463.8419 | 488.9546 | 1463.8106 | 488.9441 | 3 | 44.64 |
| LIC11416 |      |      |                            |                                                                               |                                                |         |           |          |           |          |   |       |
|          | 2    | 2.7  | EEGQAAVAGDIIDMEY           | ITRAQ4plex@N-term;<br>ITRAQ4plex(Y)@16                                        | cleaved Y-T@C-term                             | 0.0580  | 1998.0074 | 667.0098 | 1997.9496 | 666.9905 | 3 | 48.77 |
|          | 2    | 2.7  | EGFEDR                     | ITRAQ4plex@N-term;<br>Deamidated(R)@6                                         |                                                | 0.0844  | 896.4843  | 449.2494 | 896.3998  | 449.2072 | 2 | 25.93 |

|          |       |      |                          |                                                                                |                                                   |         |           |           |           |           |   |       |
|----------|-------|------|--------------------------|--------------------------------------------------------------------------------|---------------------------------------------------|---------|-----------|-----------|-----------|-----------|---|-------|
|          | 2     | 2.7  | IRKNLK                   | ITRAQ4plex@N-term;<br>ITRAQ4plex(K)@3;<br>ITRAQ4plex(K)@6                      | missed R-K@2; missed K-N@3                        | 0.0992  | 1202.9181 | 602.4663  | 1202.8188 | 602.4167  | 2 | 51.83 |
|          | 2     | 2.7  | KIDNILFDLVEK             | ITRAQ4plex@N-term;<br>ITRAQ4plex(K)@1;<br>ITRAQ4plex(K)@12                     | missed K-I@1                                      | -0.0088 | 1878.1104 | 627.0441  | 1878.1192 | 627.0470  | 3 | 47.18 |
|          | 2     | 2.7  | LASSYQISLSDLK            | No ITRAQ4plex@N-term;<br>Deamidated(Q)@6;<br>ITRAQ4plex(K)@13                  |                                                   | 0.0306  | 1568.8726 | 523.9648  | 1568.8419 | 523.9546  | 3 | 43.96 |
|          | 2     | 2.7  | LNIGQIKDYLNQK            | ITRAQ4plex@N-term;<br>ITRAQ4plex(K)@7;<br>ITRAQ4plex(K)@13                     |                                                   | -0.0053 | 1978.1525 | 660.3914  | 1978.1577 | 660.3932  | 3 | 36.62 |
|          | 2     | 2.7  | VAGK                     | ITRAQ4plex@N-term;<br>ITRAQ4plex(K)@4                                          | cleaved E-V@N-term                                | -0.0380 | 661.3986  | 662.4059  | 661.4366  | 662.4439  | 1 | 55.90 |
| LIC11241 |       |      |                          |                                                                                |                                                   |         |           |           |           |           |   |       |
|          | 26.32 | 31.6 | AIDAMPIGR                | ITRAQ4plex@N-term                                                              |                                                   | -0.0033 | 1199.6785 | 600.8465  | 1199.6818 | 600.8482  | 2 | 32.15 |
|          | 26.32 | 31.6 | AMPIGRGQR                | ITRAQ4plex@N-term;<br>Deamidated(R)@7;<br>Deamidated(Q)@9                      | cleaved D-A@N-term; missed R-G@7                  | 0.0519  | 1243.7347 | 415.5855  | 1243.6829 | 415.5882  | 3 | 47.76 |
|          | 26.32 | 31.6 | ARVFGLK                  | ITRAQ4plex@N-term;<br>ITRAQ4plex(K)@7                                          | cleaved I-A@N-term; missed R-V@2                  | 0.0003  | 1077.6906 | 539.8525  | 1077.6902 | 539.8524  | 2 | 40.81 |
|          | 26.32 | 31.6 | ASTVASTVEMLR             | ITRAQ4plex@N-term                                                              |                                                   | -0.0048 | 1407.7466 | 704.8806  | 1407.7513 | 704.8830  | 2 | 31.28 |
|          | 26.32 | 31.6 | ATLVVYDDLK               | ITRAQ4plex@N-term;<br>ITRAQ4plex(K)@11                                         |                                                   | -0.0551 | 1510.7936 | 756.4041  | 1510.8486 | 756.4316  | 2 | 31.40 |
|          | 13.83 | 16.4 | AYPGDVFLHSR              | Formyl@N-term;<br>ITRAQ4plex(Y)@2                                              | cleaved E-A@N-term                                | -0.0021 | 1595.7833 | 798.8989  | 1595.7854 | 798.9000  | 2 | 44.15 |
|          | 26.32 | 31.6 | DLEAFAQLGTDPAT<br>QAQLDR | ITRAQ4plex@N-term                                                              |                                                   | -0.0077 | 2545.2705 | 849.4308  | 2545.2782 | 849.4333  | 3 | 38.35 |
|          | 26.32 | 31.6 | DLGVVEVGTVLEIGDG<br>IAR  | ITRAQ4plex@N-term                                                              |                                                   | -0.9882 | 2084.1194 | 1043.0670 | 2085.1075 | 1043.5611 | 2 | 56.21 |
|          | 26.32 | 31.6 | EAYPGDVFLHSR             | ITRAQ4plex@N-term                                                              |                                                   | 0.0130  | 1696.8462 | 566.6227  | 1696.8331 | 566.6183  | 3 | 49.66 |
|          | 26.32 | 31.6 | EQYSEVLSIR               | ITRAQ4plex@N-term                                                              |                                                   | 0.0101  | 1481.7585 | 741.8865  | 1481.7484 | 741.8815  | 2 | 31.84 |
|          | 26.32 | 31.6 | GFMDKIPVAK               | ITRAQ4plex@N-term;<br>ITRAQ4plex(K)@5;<br>ITRAQ4plex(K)@10                     | missed K-I@5                                      | -0.0020 | 1536.9043 | 513.3087  | 1536.9063 | 513.3094  | 3 | 33.34 |
|          | 26.32 | 31.6 | GTGVCVYVIGQK             | ITRAQ4plex@N-term;<br>Methylthio(C)@6;<br>ITRAQ4plex(K)@14                     |                                                   | -0.0320 | 1740.9191 | 871.4668  | 1740.9510 | 871.4828  | 2 | 8.62  |
|          | 26.32 | 31.6 | GVEEVGTVLEIGDGI<br>AR    | No ITRAQ4plex@N-term                                                           | cleaved L-G@N-term                                | -0.0493 | 1712.8452 | 571.9557  | 1712.8945 | 571.9721  | 3 | 56.49 |
|          | 26.32 | 31.6 | ICVYVIGQK                | ITRAQ4plex@N-term;<br>Methylthio(C)@2;<br>Deamidated(Q)@9;<br>ITRAQ4plex(K)@10 | cleaved V-I@N-term                                | 0.0666  | 1427.8427 | 714.9286  | 1427.7760 | 714.8953  | 2 | 52.14 |
|          | 13.83 | 16.4 | IIGDRGTGK                | ITRAQ4plex@N-term;<br>Oxidation(R)@5;<br>ITRAQ4plex(K)@9                       | cleaved L-I@N-term; missed R-G@5                  | 0.0242  | 1219.7371 | 610.8758  | 1219.7128 | 610.8637  | 2 | 56.30 |
|          | 26.32 | 31.6 | IKTDEITSVLK              | ITRAQ4plex@N-term;<br>ITRAQ4plex(K)@2;<br>ITRAQ4plex(K)@11                     | missed K-T@2                                      | 0.0079  | 1678.0321 | 560.3513  | 1678.0242 | 560.3487  | 3 | 33.80 |
|          | 26.32 | 31.6 | ILEVPVGPPELLGR           | ITRAQ4plex@N-term                                                              |                                                   | -0.0121 | 1534.9084 | 768.4615  | 1534.9205 | 768.4675  | 2 | 35.10 |
|          | 26.32 | 31.6 | KATLVYDDLK               | ITRAQ4plex@N-term;<br>ITRAQ4plex(K)@1;<br>ITRAQ4plex(K)@12                     | missed K-A@1                                      | -2.0125 | 1781.0332 | 594.6850  | 1783.0457 | 595.3558  | 3 | 50.18 |
|          | 26.32 | 31.6 | LDDKYGAGSLTALP           | ITRAQ4plex@N-term;<br>Oxidation(D)@2;<br>ITRAQ4plex(K)@4                       | cleaved P-I@C-term; missed K-Y@4                  | -0.0201 | 1723.9036 | 862.9590  | 1723.9236 | 862.9691  | 2 | 56.12 |
|          | 13.83 | 16.4 | LELAQFR                  | ITRAQ4plex@N-term                                                              |                                                   | 0.0060  | 1019.5946 | 510.8046  | 1019.5886 | 510.8016  | 2 | 43.26 |
|          | 13.83 | 16.4 | LGEVLSK                  | ITRAQ4plex@N-term;<br>ITRAQ4plex(K)@7                                          |                                                   | 0.0014  | 1032.6437 | 517.3291  | 1032.6423 | 517.3284  | 2 | 40.32 |
|          | 26.32 | 31.6 | LTRPVESPAGIAMR           | ITRAQ4plex@N-term                                                              |                                                   | -0.0125 | 1737.9556 | 580.3258  | 1737.9682 | 580.3300  | 3 | 29.48 |
|          | 13.83 | 16.4 | MKLELAQFR                | ITRAQ4plex@N-term;<br>ITRAQ4plex(K)@2                                          | missed K-L@2                                      | -0.0222 | 1422.8038 | 475.2752  | 1422.8261 | 475.2826  | 3 | 52.81 |
|          | 26.32 | 31.6 | PPGR                     | No ITRAQ4plex@N-term;<br>Oxidation(P)@2                                        | cleaved R-P@N-term                                | 0.0251  | 441.2587  | 442.2660  | 441.2336  | 442.2409  | 1 | 60.44 |
|          | 26.32 | 31.6 | QPVGEPMTGI               | ITRAQ4plex@N-term                                                              | cleaved I-K@C-term                                | 0.0152  | 1299.6766 | 434.2328  | 1299.6615 | 434.2278  | 3 | 27.66 |
|          | 26.32 | 31.6 | QPVGEPMTGIK              | ITRAQ4plex@N-term;<br>ITRAQ4plex(K)@12                                         |                                                   | -0.0181 | 1571.8403 | 786.9274  | 1571.8585 | 786.9365  | 2 | 27.71 |
|          | 26.32 | 31.6 | RTNRILEVPVGPPELLG<br>R   | Acetyl@N-term;<br>Oxidation(P)@12;<br>Deamidated(R)@17                         | missed R-T@1; missed R-I@4                        | -0.0005 | 1977.1003 | 660.0407  | 1977.1007 | 660.0409  | 3 | 47.98 |
|          | 26.32 | 31.6 | SRLLEAAK                 | ITRAQ4plex@N-term;<br>Deamidated(R)@2;<br>Deamidated(R)@6;<br>ITRAQ4plex(K)@9  | cleaved H-S@N-term; missed R-L@2;<br>missed R-A@6 | -0.0317 | 1332.7653 | 667.3899  | 1332.7969 | 667.4057  | 2 | 30.76 |
|          | 26.32 | 31.6 | TDEITSVLK                | ITRAQ4plex@N-term;<br>ITRAQ4plex(K)@9                                          |                                                   | -0.0043 | 1292.7388 | 647.3766  | 1292.7431 | 647.3788  | 2 | 30.22 |

|          |       |      |                                |                                                                                |                                        |         |           |           |           |           |   |       |
|----------|-------|------|--------------------------------|--------------------------------------------------------------------------------|----------------------------------------|---------|-----------|-----------|-----------|-----------|---|-------|
|          | 13.83 | 16.4 | VGSAQIK                        | No iTRAQ4plex@N-term;<br>Deamidated(Q)@6;<br>iTRAQ4plex(K)@8                   |                                        | -0.0139 | 917.5165  | 459.7655  | 917.5304  | 459.7725  | 2 | 41.95 |
|          | 26.32 | 31.6 | VVNPLGEPIDGK                   | iTRAQ4plex@N-term;<br>iTRAQ4plex(K)@12                                         |                                        | -0.0122 | 1524.8634 | 763.4390  | 1524.8755 | 763.4450  | 2 | 30.63 |
|          | 13.83 | 16.4 | YLLNTIK                        | iTRAQ4plex@N-term;<br>iTRAQ4plex(K)@7                                          |                                        | -0.0002 | 1151.7156 | 576.8651  | 1151.7158 | 576.8652  | 2 | 42.83 |
| LIC11195 |       |      |                                |                                                                                |                                        |         |           |           |           |           |   |       |
|          | 2     | 3.2  | AIQN                           | No iTRAQ4plex@N-term                                                           | cleaved N-A@C-term                     | 0.0235  | 444.2567  | 445.2640  | 444.2332  | 445.2405  | 1 | 31.56 |
|          | 2     | 3.2  | ENIHSQTVR                      | iTRAQ4plex@N-term                                                              |                                        | -0.0100 | 1355.6815 | 452.9011  | 1355.6915 | 452.9045  | 3 | 24.44 |
|          | 2     | 3.2  | KHEDLLTMR                      | iTRAQ4plex@N-term;<br>iTRAQ4plex(K)@1;<br>Oxidation(H)@2                       | missed K-H@1                           | -0.0653 | 1445.7251 | 723.8698  | 1445.7904 | 723.9025  | 2 | 47.05 |
| LIC11063 |       |      |                                |                                                                                |                                        |         |           |           |           |           |   |       |
|          | 4.29  | 7.9  | AFFI                           | iTRAQ4plex@N-term                                                              | cleaved G-A@N-term; cleaved I-L@C-term | 0.0104  | 640.3810  | 641.3883  | 640.3706  | 641.3779  | 1 | 58.72 |
|          | 4.29  | 7.9  | FILK                           | iTRAQ4plex@N-term;<br>iTRAQ4plex(K)@4                                          | cleaved F-F@N-term                     | 0.0148  | 807.5611  | 404.7878  | 807.5462  | 404.7804  | 2 | 41.34 |
|          | 4.29  | 7.9  | IDRIPVPLNPLFK                  | iTRAQ4plex@N-term;<br>Deamidated(R)@3;<br>Oxidation(F)@13;<br>iTRAQ4plex(K)@14 | cleaved M-I@N-term; missed R-I@3       | 0.0041  | 1973.1636 | 658.7285  | 1973.1594 | 658.7271  | 3 | 53.09 |
|          | 2     | 4.4  | IIILL                          | iTRAQ4plex@N-term                                                              | cleaved S-I@N-term; cleaved L-V@C-term | 0.0124  | 727.5453  | 728.5526  | 727.5329  | 728.5402  | 1 | 55.80 |
|          | 4.29  | 7.9  | IPVPFLNPLFK                    | iTRAQ4plex@N-term;<br>iTRAQ4plex(K)@11                                         |                                        | 0.0062  | 1571.9745 | 786.9945  | 1571.9683 | 786.9914  | 2 | 51.98 |
|          | 4.29  | 7.9  | LLVEFLR                        | iTRAQ4plex@N-term                                                              |                                        | 0.0266  | 1032.6720 | 517.3433  | 1032.6454 | 517.3300  | 2 | 49.42 |
|          | 4.29  | 7.9  | LNPLFK                         | iTRAQ4plex@N-term;<br>Oxidation(N)@2;<br>iTRAQ4plex(K)@6                       | cleaved F-L@N-term                     | 0.0443  | 1034.6812 | 518.3478  | 1034.6368 | 518.3257  | 2 | 48.92 |
|          | 2     | 4.4  | VNIP                           | iTRAQ4plex@N-term;<br>Deamidated(N)@2                                          | cleaved F-V@N-term; cleaved P-N@C-term | 0.0104  | 586.3553  | 587.3625  | 586.3448  | 587.3521  | 1 | 53.86 |
|          | 2     | 4.4  | YIYPLTHWYGFGR                  | iTRAQ4plex@N-term                                                              |                                        | 0.0190  | 1912.9937 | 638.6718  | 1912.9746 | 638.6655  | 3 | 35.88 |
| LIC10859 |       |      |                                |                                                                                |                                        |         |           |           |           |           |   |       |
|          | 2     | 2.5  | ATAT                           | iTRAQ4plex@N-term                                                              | cleaved V-A@N-term; cleaved T-V@C-term | 0.0077  | 506.2899  | 507.2972  | 506.2822  | 507.2895  | 1 | 54.73 |
|          | 2     | 2.5  | GDKDVAEVS                      | iTRAQ4plex@N-term;<br>iTRAQ4plex(K)@3                                          |                                        | -0.0195 | 1362.7152 | 455.2457  | 1362.7347 | 455.2522  | 3 | 26.64 |
|          | 2     | 2.5  | INNTIGQVLIK                    | iTRAQ4plex@N-term;<br>Deamidated(N)@3;<br>Deamidated(Q)@7;<br>iTRAQ4plex(K)@12 |                                        | -0.0343 | 1572.8987 | 787.4566  | 1572.9330 | 787.4738  | 2 | 41.29 |
|          | 2     | 2.5  | RTMSK                          | iTRAQ4plex@N-term;<br>Oxidation(M)@3;<br>iTRAQ4plex(K)@5                       | cleaved A-R@N-term; missed R-T@1       | -0.0646 | 925.4613  | 463.7379  | 925.5259  | 463.7702  | 2 | 30.30 |
| LIC10853 |       |      |                                |                                                                                |                                        |         |           |           |           |           |   |       |
|          | 3     | 9.8  | ANPSLVEDIR                     | iTRAQ4plex@N-term                                                              |                                        | -0.0088 | 1256.6759 | 629.3452  | 1256.6846 | 629.3496  | 2 | 29.49 |
|          | 3     | 9.8  | EITT                           | Glu->pyro-Glu@N-term                                                           | cleaved T-I@C-term                     | 0.0102  | 444.2322  | 445.2395  | 444.2220  | 445.2293  | 1 | 59.77 |
|          | 3     | 9.8  | ITDSYIDK                       | iTRAQ4plex@N-term;<br>iTRAQ4plex(K)@8                                          |                                        | -0.0198 | 1241.6549 | 621.8347  | 1241.6747 | 621.8446  | 2 | 29.16 |
| LIC10850 |       |      |                                |                                                                                |                                        |         |           |           |           |           |   |       |
|          | 12    | 33.3 | AISLFLETMSNAIEGT<br>GGVVEQPR   | iTRAQ4plex@N-term                                                              |                                        | -0.0079 | 2761.4363 | 921.4860  | 2761.4442 | 921.4887  | 3 | 43.86 |
|          | 12    | 33.3 | FIMDEDPDSKK                    | iTRAQ4plex@N-term;<br>iTRAQ4plex(K)@10;<br>iTRAQ4plex(K)@11                    | missed K-K@10                          | -0.0019 | 1755.9060 | 586.3093  | 1755.9079 | 586.3099  | 3 | 31.15 |
|          | 12    | 33.3 | FTAR                           | iTRAQ4plex@N-term                                                              | cleaved V-F@N-term                     | 0.0277  | 637.3947  | 638.4019  | 637.3669  | 638.3742  | 1 | 56.31 |
|          | 4.48  | 7.1  | GTGG                           | iTRAQ4plex@N-term                                                              | cleaved E-G@N-term; cleaved G-V@C-term | 0.0669  | 434.2916  | 435.2988  | 434.2247  | 435.2320  | 1 | 57.24 |
|          | 4.48  | 7.1  | HQTR                           | iTRAQ4plex@N-term                                                              | cleaved G-H@N-term                     | 0.0166  | 684.3954  | 685.4027  | 684.3789  | 685.3862  | 1 | 59.83 |
|          | 12    | 33.3 | IEGT                           | No iTRAQ4plex@N-term                                                           | cleaved V-I@N-term; cleaved T-G@C-term | 0.0354  | 418.2418  | 419.2491  | 418.2064  | 419.2136  | 1 | 49.86 |
|          | 12    | 33.3 | IFAVVDTNCDPELIDYP<br>IPGNDDAIR | iTRAQ4plex@N-term;<br>Methylthio(C)@9                                          |                                        | 0.0027  | 3064.4670 | 1022.4960 | 3064.4644 | 1022.4954 | 3 | 39.40 |
|          | 12    | 33.3 | KLEGMEADNSFEK                  | iTRAQ4plex@N-term;<br>iTRAQ4plex(K)@1;<br>iTRAQ4plex(K)@13                     | missed K-L@1                           | -0.0183 | 1928.9696 | 643.9971  | 1928.9879 | 644.0032  | 3 | 31.32 |
|          | 12    | 33.3 | KTLGGIK                        | iTRAQ4plex@N-term;<br>iTRAQ4plex(K)@1;<br>iTRAQ4plex(K)@7                      | missed K-T@1                           | 0.2083  | 1147.9738 | 574.9941  | 1147.7654 | 574.8900  | 2 | 53.62 |
|          | 4.48  | 7.1  | MAPYVFTAR                      | iTRAQ4plex@N-term                                                              |                                        | -0.0014 | 1198.6277 | 600.3211  | 1198.6290 | 600.3218  | 2 | 42.39 |
|          | 12    | 33.3 | NGHIIDLQK                      | iTRAQ4plex@N-term;<br>Deamidated(N)@1;<br>iTRAQ4plex(K)@10                     |                                        | 0.0084  | 1438.8472 | 480.6230  | 1438.8387 | 480.6202  | 3 | 31.99 |

|          |      |      |                   |                                                                                                  |                                                   |         |           |          |           |          |   |       |
|----------|------|------|-------------------|--------------------------------------------------------------------------------------------------|---------------------------------------------------|---------|-----------|----------|-----------|----------|---|-------|
|          | 12   | 33.3 | NGIHIDLQKTVQK     | ITRAQ4plex@N-term;<br>Deamidated(N)@1;<br>Oxidation(H)@4; Oxidation(D)@7                         | missed K-T@10                                     | -0.0047 | 2071.1956 | 691.4058 | 2071.2003 | 691.4074 | 3 | 47.21 |
|          | 12   | 33.3 | VIDP              | ITRAQ4plex@N-term                                                                                | cleaved F-V@N-term; cleaved P-K@C-term            | 0.0104  | 586.3553  | 587.3625 | 586.3448  | 587.3521 | 1 | 53.86 |
|          | 4.48 | 7.1  | VLFVGTK           | ITRAQ4plex@N-term;<br>ITRAQ4plex(K)@7                                                            |                                                   | -0.0130 | 1050.6552 | 526.3348 | 1050.6681 | 526.3413 | 2 | 41.93 |
|          | 12   | 33.3 | WPGGLLTNWNTVK     | ITRAQ4plex@N-term;<br>ITRAQ4plex(K)@13                                                           |                                                   | -0.0085 | 1772.9733 | 887.4939 | 1772.9817 | 887.4981 | 2 | 35.26 |
| LIC10842 |      |      |                   |                                                                                                  |                                                   |         |           |          |           |          |   |       |
|          | 4.46 | 8.1  | ALVQLVESFQQGK     | ITRAQ4plex@N-term;<br>ITRAQ4plex(K)@13                                                           |                                                   | 0.0080  | 1734.0000 | 579.0073 | 1733.9920 | 579.0046 | 3 | 49.51 |
|          | 2    | 3.9  | EAIELTEAACK       | ITRAQ4plex@N-term;<br>Methylthio(C)@10;<br>ITRAQ4plex(K)@11                                      |                                                   | 0.0617  | 1510.8232 | 756.4189 | 1510.7615 | 756.3880 | 2 | 58.56 |
|          | 2    | 3.9  | IPGR              | No ITRAQ4plex@N-term                                                                             | cleaved N-I@N-term                                | -0.0113 | 441.2587  | 442.2660 | 441.2700  | 442.2772 | 1 | 60.44 |
|          | 4.46 | 8.1  | LISLVGNK          | ITRAQ4plex@N-term;<br>ITRAQ4plex(K)@8                                                            |                                                   | -0.0154 | 1130.7113 | 566.3629 | 1130.7267 | 566.3706 | 2 | 43.63 |
|          | 2    | 3.9  | SEAK              | No ITRAQ4plex@N-term;<br>ITRAQ4plex(K)@4                                                         | cleaved I-S@N-term                                | 0.0381  | 577.3574  | 578.3647 | 577.3193  | 578.3266 | 1 | 56.92 |
|          | 2    | 3.9  | TSVNLLETPLR       | ITRAQ4plex@N-term                                                                                |                                                   | 0.0039  | 1484.8723 | 743.4434 | 1484.8684 | 743.4415 | 2 | 32.95 |
|          | 4.46 | 8.1  | VLEGLK            | ITRAQ4plex@N-term;<br>ITRAQ4plex(K)@6                                                            |                                                   | 0.0208  | 945.6311  | 473.8228 | 945.6103  | 473.8124 | 2 | 40.44 |
|          | 4.46 | 8.1  | VMLYNIPGR         | ITRAQ4plex@N-term;<br>Oxidation(Y)@4;<br>Deamidated(N)@5                                         | cleaved P-V@N-term                                | 0.0047  | 1222.6549 | 408.5589 | 1222.6502 | 408.5573 | 3 | 34.65 |
| LIC10764 |      |      |                   |                                                                                                  |                                                   |         |           |          |           |          |   |       |
|          | 2    | 7.4  | SKIEPATGGTVR      | ITRAQ4plex@N-term;<br>ITRAQ4plex(K)@2                                                            | missed K-I@2                                      | -0.0093 | 1502.8567 | 501.9595 | 1502.8660 | 501.9626 | 3 | 36.87 |
| LIC10762 |      |      |                   |                                                                                                  |                                                   |         |           |          |           |          |   |       |
|          | 4    | 19.4 | AIIEAIRPLSLNVDK   | ITRAQ4plex@N-term;<br>ITRAQ4plex(K)@18                                                           |                                                   | -0.0113 | 2309.3447 | 770.7889 | 2309.3562 | 770.7927 | 3 | 37.01 |
|          | 4    | 19.4 | DIKDYLNQR         | ITRAQ4plex@N-term;<br>ITRAQ4plex(K)@3                                                            |                                                   | -0.0043 | 1451.7933 | 484.9384 | 1451.7976 | 484.9398 | 3 | 31.67 |
|          | 4    | 19.4 | RRSDMAPAK         | ITRAQ4plex@N-term;<br>Deamidated(R)@1;<br>Deamidated(R)@2;<br>Oxidation(M)@5;<br>ITRAQ4plex(K)@9 | cleaved F-R@N-term; missed R-R@1;<br>missed R-S@2 | -0.0938 | 1336.6074 | 669.3110 | 1336.7013 | 669.3579 | 2 | 32.84 |
|          | 4    | 19.4 | YDLNLTGGTTGQVGAIR | ITRAQ4plex@N-term;<br>Deamidated(N)@6;<br>Deamidated(R)@20                                       |                                                   | 0.1535  | 2151.2463 | 718.0894 | 2151.0930 | 718.0383 | 3 | 36.38 |
| LIC10756 |      |      |                   |                                                                                                  |                                                   |         |           |          |           |          |   |       |
|          | 7.84 | 28.0 | EALENAKPQVEVK     | ITRAQ4plex@N-term;<br>ITRAQ4plex(K)@7;<br>ITRAQ4plex(K)@13                                       |                                                   | -0.0277 | 1886.0563 | 629.6927 | 1886.0838 | 629.7019 | 3 | 29.27 |
|          | 7.84 | 28.0 | FINCLMLSGK        | ITRAQ4plex@N-term;<br>Methylthio(C)@4;<br>ITRAQ4plex(K)@10                                       |                                                   | 0.1136  | 1458.8777 | 730.4461 | 1458.7641 | 730.3893 | 2 | 37.31 |
|          | 7.84 | 28.0 | GTGSAIK           | ITRAQ4plex@N-term;<br>ITRAQ4plex(K)@7                                                            |                                                   | -0.0370 | 920.5165  | 461.2655 | 920.5535  | 461.2840 | 2 | 37.57 |
|          | 4.46 | 19.7 | IRYSRDR           | ITRAQ4plex@N-term                                                                                | cleaved L-I@N-term; missed R-Y@2; missed R-D@5    | 0.0525  | 1108.6748 | 555.3447 | 1108.6223 | 555.3184 | 2 | 41.86 |
|          | 7.84 | 28.0 | KITPDPVYNDVQVAK   | ITRAQ4plex@N-term;<br>ITRAQ4plex(K)@1;<br>ITRAQ4plex(K)@15                                       | missed K-I@1                                      | -0.0035 | 2118.2017 | 707.0745 | 2118.2050 | 707.0756 | 3 | 30.83 |
|          | 7.84 | 28.0 | LAAEFIEAQK        | ITRAQ4plex@N-term;<br>ITRAQ4plex(K)@10                                                           |                                                   | 0.0011  | 1406.8024 | 704.4084 | 1406.8013 | 704.4079 | 2 | 43.93 |
|          | 7.84 | 28.0 | LALGIRWLIR        | ITRAQ4plex@N-term;<br>Oxidation(R)@6; Oxidation(W)@7                                             | missed R-W@6                                      | -0.0463 | 1385.8165 | 462.9461 | 1385.8629 | 462.9616 | 3 | 27.98 |
|          | 4.46 | 19.7 | LGIR              | ITRAQ4plex@N-term                                                                                | cleaved A-L@N-term                                | 0.0075  | 601.4109  | 602.4182 | 601.4033  | 602.4106 | 1 | 53.62 |
|          | 7.84 | 28.0 | QVPVEVRPER        | ITRAQ4plex@N-term                                                                                | cleaved Y-Q@N-term                                | -0.0201 | 1351.7493 | 451.5904 | 1351.7694 | 451.5971 | 3 | 27.95 |
|          | 4.46 | 19.7 | RLALGIR           | ITRAQ4plex@N-term;<br>Deamidated(R)@1                                                            | missed R-L@1                                      | 0.0069  | 942.6165  | 472.3155 | 942.6096  | 472.3121 | 2 | 44.33 |
|          | 7.84 | 28.0 | SVAEQLFYDALEIIQK  | ITRAQ4plex@N-term;<br>ITRAQ4plex(K)@16                                                           |                                                   | 0.0088  | 2154.1904 | 719.0707 | 2154.1816 | 719.0678 | 3 | 4.69  |
|          | 7.84 | 28.0 | TGNDPYTTFR        | No ITRAQ4plex@N-term                                                                             |                                                   | 0.0068  | 1170.5374 | 586.2759 | 1170.5306 | 586.2726 | 2 | 28.51 |
|          | 4.46 | 19.7 | VGGVTYQVPVEVRPER  | Carbamyl@N-term                                                                                  |                                                   | 0.0062  | 1826.9701 | 914.4923 | 1826.9639 | 914.4892 | 2 | 42.35 |
| LIC10755 |      |      |                   |                                                                                                  |                                                   |         |           |          |           |          |   |       |
|          | 2.54 | 8.9  | ARVR              | No ITRAQ4plex@N-term                                                                             | cleaved V-A@N-term; missed R-V@2                  | 0.0355  | 500.3538  | 501.3611 | 500.3183  | 501.3256 | 1 | 44.93 |
|          | 2.54 | 8.9  | GTLDTLVGDKR       | ITRAQ4plex@N-term;<br>ITRAQ4plex(K)@10                                                           | missed K-R@10                                     | -0.0123 | 1461.8273 | 488.2830 | 1461.8395 | 488.2871 | 3 | 29.58 |



|          |       |      |                                   |                                                                                                                          |                                                    |         |           |           |           |           |   |       |
|----------|-------|------|-----------------------------------|--------------------------------------------------------------------------------------------------------------------------|----------------------------------------------------|---------|-----------|-----------|-----------|-----------|---|-------|
|          | 2.54  | 8.9  | PTISQLIR                          | ITRAQ4plex@N-term                                                                                                        | cleaved M-P@N-term                                 | -0.0137 | 1070.6433 | 536.3289  | 1070.6570 | 536.3358  | 2 | 35.93 |
|          | 2.54  | 8.9  | SQILIR                            | ITRAQ4plex@N-term                                                                                                        | cleaved I-S@N-term                                 | -0.0087 | 759.4637  | 760.4710  | 759.4725  | 760.4797  | 1 | 56.94 |
|          | 2.54  | 8.9  | VKDLPGVR                          | ITRAQ4plex@N-term;<br>ITRAQ4plex(K)@2;<br>Methylthio(D)@3                                                                |                                                    | -0.0090 | 1216.7115 | 406.5778  | 1216.7205 | 406.5808  | 3 | 29.90 |
|          | 2.51  | 8.9  | VMFTTPK                           | ITRAQ4plex@N-term;<br>ITRAQ4plex(K)@7                                                                                    |                                                    | 0.0046  | 1110.6398 | 556.3271  | 1110.6351 | 556.3248  | 2 | 40.37 |
| LIC10754 |       |      |                                   |                                                                                                                          |                                                    |         |           |           |           |           |   |       |
|          | 45.51 | 20.2 | ADSEYRK                           | ITRAQ4plex@N-term;<br>ITRAQ4plex(K)@7                                                                                    | missed R-K@6                                       | 0.0328  | 1155.6455 | 578.8300  | 1155.6128 | 578.8137  | 2 | 30.93 |
|          | 45.51 | 20.2 | AGDILFK                           | ITRAQ4plex@N-term;<br>ITRAQ4plex(K)@7                                                                                    |                                                    | 0.0205  | 1050.6522 | 526.3334  | 1050.6317 | 526.3231  | 2 | 46.65 |
|          | 36.52 | 14.5 | AGDILFKIPTVAEK                    | No ITRAQ4plex@N-term;<br>ITRAQ4plex(K)@7;<br>ITRAQ4plex(K)@14                                                            | missed K-I@7                                       | -0.1233 | 1788.9360 | 597.3193  | 1789.0593 | 597.3604  | 3 | 34.19 |
|          | 45.51 | 20.2 | DATTLAETDGG                       | ITRAQ4plex@N-term;<br>ITRAQ4plex(K)@11                                                                                   |                                                    | 0.0308  | 1408.7598 | 705.3871  | 1408.7289 | 705.3717  | 2 | 26.46 |
|          | 45.51 | 20.2 | DGLFCEK                           | ITRAQ4plex@N-term;<br>Methylthio(C)@5;<br>ITRAQ4plex(K)@7                                                                |                                                    | 0.0837  | 1144.6338 | 573.3242  | 1144.5500 | 573.2823  | 2 | 35.67 |
|          | 36.52 | 14.5 | DITGGLPR                          | ITRAQ4plex@N-term                                                                                                        |                                                    | -0.0004 | 971.5518  | 486.7832  | 971.5522  | 486.7834  | 2 | 38.06 |
|          | 45.51 | 20.2 | DIVPVIPP                          | ITRAQ4plex@N-term;<br>Oxidation(D)@1;<br>Dioxidation(P)@7                                                                | cleaved L-D@N-term; cleaved P-E@C-term             | 0.0203  | 1040.6079 | 521.3112  | 1040.5876 | 521.3011  | 2 | 40.79 |
|          | 45.51 | 20.2 | DLAPNIKSAKK                       | ITRAQ4plex@N-term;<br>Oxidation(F)@4;<br>ITRAQ4plex(K)@7;<br>ITRAQ4plex(K)@10;<br>ITRAQ4plex(K)@11                       | cleaved L-D@N-term; missed K-S@7;<br>missed K-K@10 | -0.0306 | 1776.0652 | 593.0290  | 1776.0956 | 593.0392  | 3 | 35.55 |
|          | 45.51 | 20.2 | EGLSVLEFFISTHGAR                  | ITRAQ4plex@N-term                                                                                                        |                                                    | 0.0490  | 1906.0562 | 636.3593  | 1906.0070 | 636.3430  | 3 | 38.03 |
|          | 36.52 | 14.5 | EHKVSYTGIVNNINGR                  | ITRAQ4plex@N-term;<br>Oxidation(H)@2;<br>ITRAQ4plex(K)@3;<br>Deamidated(N)@11;<br>Deamidated(N)@12                       | missed K-V@3                                       | 0.0173  | 2106.1123 | 703.0447  | 2106.0949 | 703.0389  | 3 | 50.56 |
|          | 45.51 | 20.2 | EHPVMLNR                          | Glu->pyro-Glu@N-term                                                                                                     |                                                    | 0.0086  | 976.4999  | 489.2572  | 976.4913  | 489.2529  | 2 | 27.05 |
|          | 45.51 | 20.2 | EKRVLVIHPDNPDEK                   | Glu->pyro-Glu@N-term;<br>ITRAQ4plex(K)@2;<br>Deamidated(N)@11;<br>Oxidation(D)@13;<br>ITRAQ4plex(K)@16                   | missed K-R@2; missed R-V@3                         | 0.0095  | 2252.2139 | 751.7452  | 2252.2045 | 751.7421  | 3 | 51.01 |
|          | 45.51 | 20.2 | ELFK                              | ITRAQ4plex@N-term;<br>ITRAQ4plex(K)@4                                                                                    | cleaved L-E@N-term; cleaved K-P@C-term             | -0.0679 | 823.4368  | 824.4441  | 823.5047  | 824.5120  | 1 | 53.59 |
|          | 45.51 | 20.2 | ETNRIADVYDK                       | No ITRAQ4plex@N-term;<br>Oxidation(D)@11;<br>ITRAQ4plex(K)@12                                                            | missed R-I@4                                       | -0.0816 | 1595.7461 | 798.8803  | 1595.8277 | 798.9211  | 2 | 51.54 |
|          | 45.51 | 20.2 | FAPTISIEDIR                       | No ITRAQ4plex@N-term                                                                                                     | cleaved L-F@N-term                                 | 0.0629  | 1260.7343 | 421.2520  | 1260.6714 | 421.2311  | 3 | 59.25 |
|          | 45.51 | 20.2 | FATSDLNLYRRVINR                   | ITRAQ4plex@N-term                                                                                                        | missed R-R@11; missed R-V@12                       | -0.0535 | 2096.0713 | 699.6977  | 2096.1249 | 699.7156  | 3 | 53.90 |
|          | 45.51 | 20.2 | FVAGIGADAIK                       | ITRAQ4plex@N-term;<br>ITRAQ4plex(K)@11                                                                                   |                                                    | 0.0091  | 1348.8049 | 675.4097  | 1348.7958 | 675.4052  | 2 | 30.88 |
|          | 45.51 | 20.2 | FVAGIGADAIKELLARI<br>DVDAEARMIRQK | ITRAQ4plex@N-term;<br>Oxidation(F)@1;<br>ITRAQ4plex(K)@11;<br>Deamidated(R)@24;<br>Deamidated(R)@27;<br>ITRAQ4plex(K)@29 | missed R-I@16; missed R-M@24; missed R-Q@27        | 0.0315  | 3619.0449 | 905.7685  | 3619.0133 | 905.7606  | 4 | 54.90 |
|          | 36.52 | 14.5 | GDQIDGNDLDPHDIL                   | ITRAQ4plex@N-term;<br>Deamidated(N)@8                                                                                    | cleaved L-R@C-term                                 | 0.0269  | 1780.8506 | 594.6241  | 1780.8237 | 594.6152  | 3 | 33.88 |
|          | 45.51 | 20.2 | GGFNPVFIMAASGAR                   | ITRAQ4plex@N-term                                                                                                        |                                                    | -0.0094 | 1637.8375 | 819.9260  | 1637.8470 | 819.9308  | 2 | 35.04 |
|          | 45.51 | 20.2 | GKTDNLMLGK                        | ITRAQ4plex@N-term;<br>ITRAQ4plex(K)@2;<br>Deamidated(N)@5;<br>ITRAQ4plex(K)@10                                           | missed K-T@2                                       | 0.0053  | 1508.8651 | 503.9623  | 1508.8598 | 503.9605  | 3 | 41.94 |
|          | 45.51 | 20.2 | GLMAKP                            | ITRAQ4plex@N-term;<br>ITRAQ4plex(K)@5                                                                                    | cleaved P-S@C-term                                 | -0.0587 | 903.4869  | 904.4941  | 903.5455  | 904.5528  | 1 | 41.39 |
|          | 45.51 | 20.2 | GSKQIRQLAGMRGL<br>MAKPSGEIELAIR   | No ITRAQ4plex@N-term;<br>ITRAQ4plex(K)@3;<br>Oxidation(R)@7;<br>ITRAQ4plex(K)@18                                         | missed K-Q@3; missed R-Q@7; missed R-G@13          | -0.1367 | 3454.8103 | 1152.6110 | 3454.9472 | 1152.6563 | 3 | 52.42 |
|          | 45.51 | 20.2 | GYLDEYGDKFVAGIG<br>ADAIAK         | ITRAQ4plex@N-term;<br>ITRAQ4plex(K)@9;<br>Oxidation(F)@10;<br>ITRAQ4plex(K)@20                                           | cleaved H-G@N-term; missed K-F@9                   | -0.0372 | 2549.3008 | 638.3325  | 2549.3379 | 638.3417  | 4 | 43.71 |

|       |      |                               |                                                                                                                         |                                                                         |         |           |           |           |           |   |       |
|-------|------|-------------------------------|-------------------------------------------------------------------------------------------------------------------------|-------------------------------------------------------------------------|---------|-----------|-----------|-----------|-----------|---|-------|
| 45.51 | 20.2 | HPDNPDLK                      | ITRAQ4plex@N-term;<br>Oxidation(P)@2;<br>ITRAQ4plex(K)@9                                                                | cleaved I-H@N-term                                                      | 0.0091  | 1367.7017 | 684.8581  | 1367.6925 | 684.8535  | 2 | 33.05 |
| 45.51 | 20.2 | IDVDAEAR                      | ITRAQ4plex@N-term                                                                                                       |                                                                         | 0.0092  | 1031.5461 | 516.7803  | 1031.5369 | 516.7757  | 2 | 26.99 |
| 45.51 | 20.2 | IEISGEIVK                     | ITRAQ4plex@N-term;<br>ITRAQ4plex(K)@9                                                                                   |                                                                         | 0.0076  | 1274.7765 | 638.3955  | 1274.7689 | 638.3917  | 2 | 55.62 |
| 36.52 | 14.5 | IFGTTK                        | ITRAQ4plex@N-term;<br>ITRAQ4plex(K)@6                                                                                   |                                                                         | -0.0375 | 953.5415  | 477.7780  | 953.5790  | 477.7968  | 2 | 38.79 |
| 45.51 | 20.2 | IFNT                          | ITRAQ4plex@N-term                                                                                                       | cleaved L-I@N-term; cleaved T-I@C-term                                  | 0.0330  | 637.3887  | 638.3960  | 637.3557  | 638.3630  | 1 | 55.89 |
| 36.52 | 14.5 | IGQP                          | ITRAQ4plex@N-term                                                                                                       | cleaved S-I@N-term; cleaved P-G@C-term                                  | 0.1662  | 557.4957  | 558.5029  | 557.3295  | 558.3368  | 1 | 58.78 |
| 45.51 | 20.2 | IIDP                          | No ITRAQ4plex@N-term                                                                                                    | cleaved V-I@N-term; cleaved P-A@C-term                                  | 0.0110  | 456.2694  | 457.2766  | 456.2584  | 457.2657  | 1 | 56.48 |
| 45.51 | 20.2 | ILFK                          | ITRAQ4plex@N-term;<br>ITRAQ4plex(K)@4                                                                                   | cleaved D-I@N-term                                                      | 0.0065  | 807.5527  | 404.7836  | 807.5462  | 404.7804  | 2 | 39.59 |
| 45.51 | 20.2 | ILGEEAVIPVK                   | ITRAQ4plex@N-term;<br>ITRAQ4plex(K)@11                                                                                  |                                                                         | -0.0003 | 1454.8949 | 728.4547  | 1454.8952 | 728.4549  | 2 | 31.77 |
| 45.51 | 20.2 | IPTVAEK                       | ITRAQ4plex@N-term;<br>Oxidation(P)@2;<br>ITRAQ4plex(K)@7                                                                |                                                                         | 0.0551  | 1060.6923 | 531.3534  | 1060.6372 | 531.3259  | 2 | 44.80 |
| 45.51 | 20.2 | KPETINYR                      | ITRAQ4plex@N-term;<br>ITRAQ4plex(K)@1                                                                                   |                                                                         | -0.0408 | 1307.7034 | 436.9084  | 1307.7441 | 436.9220  | 3 | 28.80 |
| 36.52 | 14.5 | LEVLEAFR                      | ITRAQ4plex@N-term                                                                                                       |                                                                         | 0.0164  | 1119.6575 | 560.8360  | 1119.6410 | 560.8278  | 2 | 47.42 |
| 45.51 | 20.2 | LGIAFLPVLVEGK                 | Delta:H(2)C(2)@N-term;<br>Methyl(I)@3; ITRAQ4plex(K)@14                                                                 |                                                                         | -0.0162 | 1666.9982 | 834.5063  | 1667.0144 | 834.5145  | 2 | 2.73  |
| 45.51 | 20.2 | LIFNTLPEGYAVVNRPLSDKETNR      | ITRAQ4plex@N-term;<br>ITRAQ4plex(K)@21                                                                                  |                                                                         | -0.0068 | 3210.7214 | 803.6876  | 3210.7281 | 803.6893  | 4 | 37.01 |
| 45.51 | 20.2 | LIPAEI/GEAVGTIAAQSLGQPGTQLTMR | ITRAQ4plex@N-term                                                                                                       |                                                                         | -0.0193 | 2965.5835 | 989.5351  | 2965.6028 | 989.5416  | 3 | 41.09 |
| 36.52 | 14.5 | LIQYK                         | ITRAQ4plex@N-term;<br>ITRAQ4plex(K)@6                                                                                   |                                                                         | -0.0112 | 1079.6471 | 540.8308  | 1079.6583 | 540.8364  | 2 | 38.63 |
| 45.51 | 20.2 | LITNEKSQSVFSRRGSIVIQR         | ITRAQ4plex@N-term;<br>Deamidated(N)@4;<br>ITRAQ4plex(K)@6;<br>Deamidated(Q)@8;<br>Deamidated(R)@14;<br>Deamidated(Q)@20 | missed K-S@6; missed R-R@13; missed R-G@14                              | -0.0509 | 2709.4397 | 904.1538  | 2709.4905 | 904.1708  | 3 | 55.40 |
| 36.52 | 14.5 | LLALK                         | ITRAQ4plex@N-term;<br>ITRAQ4plex(K)@5                                                                                   |                                                                         | 0.0125  | 844.6115  | 423.3130  | 844.5990  | 423.3068  | 2 | 42.63 |
| 45.51 | 20.2 | LOGVHINDK                     | ITRAQ4plex@N-term;<br>ITRAQ4plex(K)@9                                                                                   |                                                                         | -0.0353 | 1310.7197 | 437.9138  | 1310.7550 | 437.9256  | 3 | 41.76 |
| 45.51 | 20.2 | LVDLDLAPNIK                   | ITRAQ4plex@N-term;<br>ITRAQ4plex(K)@11                                                                                  |                                                                         | 0.0033  | 1497.9043 | 749.9594  | 1497.9010 | 749.9578  | 2 | 33.55 |
| 45.51 | 20.2 | LVEGK                         | ITRAQ4plex@N-term;<br>ITRAQ4plex(K)@5                                                                                   | cleaved V-L@N-term                                                      | 0.0235  | 832.5497  | 417.2821  | 832.5262  | 417.2704  | 2 | 36.00 |
| 36.52 | 14.5 | LVFNEENKR                     | ITRAQ4plex@N-term;<br>Deamidated(N)@4;<br>ITRAQ4plex(K)@8                                                               | missed K-R@8                                                            | 0.0050  | 1436.7917 | 479.9379  | 1436.7867 | 479.9362  | 3 | 42.68 |
| 45.51 | 20.2 | MALELFKPF                     | ITRAQ4plex@N-term;<br>ITRAQ4plex(K)@7                                                                                   | cleaved F-I@C-term                                                      | 0.0022  | 1382.7898 | 692.4022  | 1382.7876 | 692.4011  | 2 | 37.04 |
| 45.51 | 20.2 | MALELFKPFIMK                  | ITRAQ4plex@N-term;<br>ITRAQ4plex(K)@7;<br>ITRAQ4plex(K)@12                                                              |                                                                         | -0.0016 | 1899.1077 | 634.0432  | 1899.1091 | 634.0437  | 3 | 39.85 |
| 45.51 | 20.2 | MGHIELAAPVSHIYYR              | ITRAQ4plex@N-term                                                                                                       |                                                                         | 0.0278  | 2186.1494 | 547.5446  | 2186.1217 | 547.5377  | 4 | 39.15 |
| 45.51 | 20.2 | MGLLLDMTVNQLK                 | ITRAQ4plex@N-term;<br>ITRAQ4plex(K)@13                                                                                  |                                                                         | 0.0473  | 1763.0403 | 882.5274  | 1762.9929 | 882.5037  | 2 | 48.14 |
| 36.52 | 14.5 | MIPAGTGK                      | ITRAQ4plex@N-term;<br>ITRAQ4plex(K)@9                                                                                   | cleaved H-M@N-term                                                      | 0.0071  | 1162.6696 | 582.3420  | 1162.6624 | 582.3385  | 2 | 36.43 |
| 45.51 | 20.2 | MLQEAVDALFDNSR                | ITRAQ4plex@N-term                                                                                                       |                                                                         | -0.0032 | 1751.8602 | 876.9374  | 1751.8634 | 876.9390  | 2 | 38.39 |
| 45.51 | 20.2 | NLLGKRVDSGR                   | ITRAQ4plex@N-term;<br>ITRAQ4plex(K)@5                                                                                   | cleaved Q-N@N-term; missed K-R@5;<br>missed R-V@6                       | -0.0347 | 1664.9219 | 833.4682  | 1664.9566 | 833.4856  | 2 | 38.26 |
| 45.51 | 20.2 | NRAP                          | No ITRAQ4plex@N-term                                                                                                    | cleaved L-N@N-term; cleaved P-T@C-term;<br>missed R-A@2                 | 0.0249  | 456.2694  | 457.2766  | 456.2445  | 457.2518  | 1 | 56.48 |
| 45.51 | 20.2 | PSGEIILAIR                    | No ITRAQ4plex@N-term                                                                                                    | cleaved K-P@N-term                                                      | -0.0124 | 1196.6641 | 599.3393  | 1196.6765 | 599.3455  | 2 | 59.48 |
| 45.51 | 20.2 | QETTKVLTDAIK                  | ITRAQ4plex@N-term;<br>Deamidated(Q)@1;<br>ITRAQ4plex(K)@5;<br>ITRAQ4plex(K)@13                                          | cleaved F-Q@N-term; missed K-V@5                                        | -0.0729 | 1849.9996 | 617.6738  | 1850.0726 | 617.6981  | 3 | 59.06 |
| 45.51 | 20.2 | QGRFRQNLLGKRVDSGRSVIVVGPGLK   | Gln->pyro-Glu@N-term;<br>ITRAQ4plex(K)@11;<br>Oxidation(P)@25;<br>ITRAQ4plex(K)@28                                      | missed R-F@3; missed R-Q@5; missed K-R@11; missed R-V@12; missed R-S@18 | -0.1177 | 3457.8337 | 1153.6190 | 3457.9514 | 1153.6577 | 3 | 60.65 |

|       |      |                                |                                                                                                     |                                                                  |         |           |          |           |          |   |       |
|-------|------|--------------------------------|-----------------------------------------------------------------------------------------------------|------------------------------------------------------------------|---------|-----------|----------|-----------|----------|---|-------|
| 45.51 | 20.2 | QQIRQLAGMRGLMAK                | ITRAQ4plex@N-term;<br>Deamidated(Q)@1;<br>Oxidation(M)@13;<br>ITRAQ4plex(K)@15                      | cleaved K-P@C-term; missed R-Q@4;<br>missed R-G@10               | -0.0269 | 2005.0900 | 669.3706 | 2005.1169 | 669.3796 | 3 | 35.85 |
| 36.52 | 14.5 | RGDQIDDGNLDPHDIL<br>R          | Carbamylation@N-term                                                                                | missed R-G@1                                                     | -0.0026 | 1990.9431 | 664.6550 | 1990.9457 | 664.6558 | 3 | 42.79 |
| 36.52 | 14.5 | RGSIVIQR                       | ITRAQ4plex@N-term                                                                                   | missed R-G@1                                                     | -0.0009 | 1071.6626 | 536.8386 | 1071.6635 | 536.8390 | 2 | 38.28 |
| 45.51 | 20.2 | RLEVLEAFR                      | ITRAQ4plex@N-term                                                                                   | missed R-L@1                                                     | -0.0064 | 1275.7357 | 426.2525 | 1275.7421 | 426.2546 | 3 | 34.40 |
| 45.51 | 20.2 | RSHNDFESITIR                   | ITRAQ4plex@N-term;<br>Deamidated(N)@4                                                               | cleaved M-R@N-term; missed R-S@1                                 | -0.0367 | 1618.7817 | 540.6012 | 1618.8185 | 540.6134 | 3 | 45.77 |
| 45.51 | 20.2 | RSVPSRMGLLLDMTV<br>NQLKSVLYFEK | ITRAQ4plex@N-term;<br>Deamidated(N)@16;<br>ITRAQ4plex(K)@19;<br>ITRAQ4plex(K)@26                    | cleaved Y-R@N-term; missed R-S@1;<br>missed R-M@6; missed K-S@19 | -0.0354 | 3456.8848 | 865.2285 | 3456.9202 | 865.2373 | 4 | 52.23 |
| 36.52 | 14.5 | RVINRNNRLKR                    | ITRAQ4plex@N-term;<br>ITRAQ4plex(K)@10                                                              | missed R-V@1; missed R-N@5; missed R-<br>L@8; missed K-R@10      | 0.1196  | 1726.1990 | 576.4069 | 1726.0794 | 576.3671 | 3 | 59.87 |
| 45.51 | 20.2 | SFSNLEEVHYAIDR                 | ITRAQ4plex@N-term                                                                                   |                                                                  | 0.0014  | 1822.8986 | 608.6401 | 1822.8972 | 608.6397 | 3 | 32.40 |
| 36.52 | 14.5 | SGEIELAIR                      | No ITRAQ4plex@N-term                                                                                | cleaved P-S@N-term                                               | -0.0205 | 1099.6033 | 550.8089 | 1099.6237 | 550.8191 | 2 | 35.45 |
| 36.52 | 14.5 | SHNDFESITIR                    | Carbamylation@N-term;<br>Deamidated(N)@3                                                            |                                                                  | 0.0634  | 1361.6846 | 681.8495 | 1361.6212 | 681.8179 | 2 | 41.80 |
| 45.51 | 20.2 | SISDMLK                        | ITRAQ4plex@N-term;<br>ITRAQ4plex(K)@7                                                               |                                                                  | 0.0202  | 1080.6295 | 541.3220 | 1080.6093 | 541.3119 | 2 | 38.39 |
| 45.51 | 20.2 | SISDMLK GK                     | ITRAQ4plex@N-term;<br>ITRAQ4plex(K)@7;<br>ITRAQ4plex(K)@9                                           | missed K-G@7                                                     | -0.0109 | 1409.8169 | 705.9157 | 1409.8278 | 705.9212 | 2 | 43.61 |
| 45.51 | 20.2 | SNFREGLSVLEFFIST<br>HGARK      | ITRAQ4plex@N-term;<br>Oxidation(N)@2;<br>Oxidation(F)@13;<br>ITRAQ4plex(K)@21                       | missed R-E@4; missed R-K@20                                      | 0.0711  | 2714.5095 | 679.6346 | 2714.4384 | 679.6169 | 4 | 44.17 |
| 45.51 | 20.2 | SVLYFEK                        | ITRAQ4plex@N-term;<br>ITRAQ4plex(K)@7                                                               |                                                                  | 0.0058  | 1172.6743 | 587.3444 | 1172.6685 | 587.3415 | 2 | 34.30 |
| 45.51 | 20.2 | SVPSRMGLLLDMTVN<br>QLK         | ITRAQ4plex@N-term;<br>Oxidation(P)@3;<br>ITRAQ4plex(K)@18                                           | missed R-M@5                                                     | 0.0103  | 2305.2844 | 769.4354 | 2305.2741 | 769.4320 | 3 | 42.75 |
| 36.52 | 14.5 | TADAGYLTR                      | Carbamylation@N-term;<br>ITRAQ4plex(Y)@6                                                            |                                                                  | 0.0038  | 1153.5887 | 577.8016 | 1153.5849 | 577.7997 | 2 | 36.46 |
| 36.52 | 14.5 | TALK                           | ITRAQ4plex@N-term;<br>ITRAQ4plex(K)@4                                                               | cleaved D-T@N-term                                               | 0.0116  | 719.4901  | 720.4974 | 719.4785  | 720.4858 | 1 | 58.63 |
| 45.51 | 20.2 | TDNLMGLK                       | ITRAQ4plex@N-term;<br>ITRAQ4plex(K)@8                                                               |                                                                  | 0.0356  | 1178.6929 | 590.3537 | 1178.6573 | 590.3359 | 2 | 45.63 |
| 45.51 | 20.2 | TEELSNLR                       | ITRAQ4plex@N-term;<br>ITRAQ4plex(S)@5                                                               |                                                                  | -0.0138 | 1248.6780 | 417.2333 | 1248.6917 | 417.2379 | 3 | 29.84 |
| 36.52 | 14.5 | TFHIGGAASAK                    | ITRAQ4plex@N-term;<br>ITRAQ4plex(K)@11                                                              |                                                                  | -0.0275 | 1346.7275 | 449.9164 | 1346.7550 | 449.9256 | 3 | 43.88 |
| 36.52 | 14.5 | TGIVNNGRLITNEK                 | ITRAQ4plex@N-term;<br>Deamidated(N)@6;<br>Deamidated(N)@8;<br>Deamidated(R)@10;<br>ITRAQ4plex(K)@16 | cleaved Y-T@N-term; missed R-L@10                                | 0.0330  | 2046.1531 | 683.0583 | 2046.1201 | 683.0473 | 3 | 49.20 |
| 36.52 | 14.5 | TGTIVNVK                       | ITRAQ4plex@N-term;<br>ITRAQ4plex(K)@8                                                               |                                                                  | -0.0028 | 1118.6875 | 560.3510 | 1118.6903 | 560.3524 | 2 | 37.12 |
| 45.51 | 20.2 | TNDLITESMFK                    | ITRAQ4plex@N-term;<br>ITRAQ4plex(K)@11                                                              |                                                                  | 0.0437  | 1585.8702 | 793.9424 | 1585.8265 | 793.9205 | 2 | 57.31 |
| 45.51 | 20.2 | TVLMLDDIKK                     | ITRAQ4plex@N-term;<br>ITRAQ4plex(K)@9;<br>ITRAQ4plex(K)@10                                          | missed K-K@9                                                     | -0.0120 | 1606.9574 | 536.6597 | 1606.9693 | 536.6637 | 3 | 33.76 |
| 45.51 | 20.2 | VDELFEAR                       | ITRAQ4plex@N-term                                                                                   |                                                                  | 0.0016  | 1121.5854 | 561.8000 | 1121.5839 | 561.7992 | 2 | 31.05 |
| 45.51 | 20.2 | VDYSGRSVIVVGPELK               | ITRAQ4plex@N-term;<br>ITRAQ4plex(K)@16                                                              | missed R-S@6                                                     | 0.0158  | 2005.1610 | 669.3943 | 2005.1452 | 669.3890 | 3 | 44.36 |
| 45.51 | 20.2 | VENLGYDK                       | ITRAQ4plex@N-term;<br>ITRAQ4plex(K)@8                                                               |                                                                  | -0.0012 | 1224.6582 | 613.3364 | 1224.6594 | 613.3370 | 2 | 28.24 |
| 45.51 | 20.2 | VFIMAASGAR                     | ITRAQ4plex@N-term                                                                                   | cleaved P-V@N-term                                               | -0.0321 | 1165.6079 | 583.8112 | 1165.6399 | 583.8273 | 2 | 18.79 |
| 45.51 | 20.2 | VIAEGGSPAESPILL<br>GLTK        | ITRAQ4plex@N-term;<br>ITRAQ4plex(K)@20                                                              |                                                                  | 0.0075  | 2238.3154 | 747.1124 | 2238.3079 | 747.1099 | 3 | 36.50 |
| 45.51 | 20.2 | VIEIWTK                        | ITRAQ4plex@N-term;<br>ITRAQ4plex(K)@7                                                               |                                                                  | -0.0013 | 1175.7145 | 588.8645 | 1175.7158 | 588.8652 | 2 | 43.95 |
| 45.51 | 20.2 | VINRNNRLK                      | ITRAQ4plex@N-term;<br>Deamidated(N)@3;<br>Deamidated(N)@5;<br>ITRAQ4plex(K)@9                       | missed R-N@4; missed R-L@7                                       | -0.0297 | 1415.8156 | 708.9150 | 1415.8452 | 708.9299 | 2 | 34.28 |
| 36.52 | 14.5 | VIVV                           | ITRAQ4plex@N-term                                                                                   | cleaved S-V@N-term; cleaved V-G@C-term                           | 0.0053  | 572.4072  | 573.4145 | 572.4019  | 573.4092 | 1 | 58.63 |
| 36.52 | 14.5 | VLTDAAIK                       | ITRAQ4plex@N-term;<br>ITRAQ4plex(K)@8                                                               |                                                                  | 0.0022  | 1117.6973 | 559.8559 | 1117.6950 | 559.8548 | 2 | 39.77 |
| 45.51 | 20.2 | VLYIHPDNPDEK                   | ITRAQ4plex@N-term;<br>ITRAQ4plex(K)@13                                                              |                                                                  | -0.0073 | 1839.9902 | 614.3373 | 1839.9974 | 614.3398 | 3 | 45.56 |

|          |       |      |                                             |                                                                                                    |                                        |         |           |           |           |           |   |       |
|----------|-------|------|---------------------------------------------|----------------------------------------------------------------------------------------------------|----------------------------------------|---------|-----------|-----------|-----------|-----------|---|-------|
|          | 45.51 | 20.2 | VRNGDFVK                                    | ITRAQ4plex@N-term;<br>Deamidated(N)@3;<br>ITRAQ4plex(K)@8                                          | missed R-N@2                           | -0.0520 | 1222.6394 | 408.5537  | 1222.6914 | 408.5711  | 3 | 29.20 |
|          | 45.51 | 20.2 | VTIPIGK                                     | ITRAQ4plex@N-term;<br>ITRAQ4plex(K)@7                                                              |                                        | -0.0216 | 1014.6465 | 508.3305  | 1014.6681 | 508.3413  | 2 | 29.47 |
|          | 45.51 | 20.2 | YATLFAPTISIEDIR                             | ITRAQ4plex@N-term                                                                                  |                                        | -0.0048 | 1853.0009 | 927.5077  | 1853.0056 | 927.5101  | 2 | 38.14 |
|          | 36.52 | 14.5 | YHEMGLPK                                    | ITRAQ4plex@N-term;<br>ITRAQ4plex(K)@8                                                              |                                        | 0.0167  | 1261.6899 | 421.5706  | 1261.6733 | 421.5650  | 3 | 42.28 |
|          | 45.51 | 20.2 | YKDIIVFK                                    | ITRAQ4plex@N-term;<br>ITRAQ4plex(K)@2;<br>ITRAQ4plex(K)@8                                          |                                        | -0.0326 | 1414.8223 | 472.6147  | 1414.8550 | 472.6256  | 3 | 33.09 |
|          | 45.51 | 20.2 | YTAEDVIDPVTQVY<br>PR                        | ITRAQ4plex@N-term                                                                                  |                                        | -0.0022 | 2223.1160 | 742.0459  | 2223.1181 | 742.0466  | 3 | 35.51 |
|          | 45.51 | 20.2 | YVIIDPADSGR                                 | ITRAQ4plex@N-term                                                                                  |                                        | 0.0050  | 1348.7159 | 675.3652  | 1348.7109 | 675.3627  | 2 | 30.55 |
| LIC10752 |       |      |                                             |                                                                                                    |                                        |         |           |           |           |           |   |       |
|          | 16.28 | 65.4 | ADAK                                        | No ITRAQ4plex@N-term;<br>ITRAQ4plex(K)@4                                                           | cleaved L-A@N-term                     | 0.0013  | 547.3101  | 548.3174  | 547.3088  | 548.3160  | 1 | 44.19 |
|          | 8.13  | 26.8 | AEADLKK                                     | Carbamyl@N-term;<br>ITRAQ4plex(K)@7;<br>ITRAQ4plex(K)@8                                            | missed K-K@7                           | 0.0021  | 1219.6674 | 610.8409  | 1219.6652 | 610.8399  | 2 | 34.72 |
|          | 16.28 | 65.4 | EGAGAQIELK                                  | ITRAQ4plex@N-term;<br>ITRAQ4plex(K)@10                                                             | cleaved F-E@N-term                     | 0.0112  | 1302.7499 | 652.3822  | 1302.7387 | 652.3766  | 2 | 59.27 |
|          | 16.28 | 65.4 | EITGLGLADAK                                 | ITRAQ4plex@N-term;<br>ITRAQ4plex(K)@11                                                             |                                        | 0.0099  | 1374.8062 | 688.4103  | 1374.7962 | 688.4054  | 2 | 29.94 |
|          | 16.28 | 65.4 | FGISAAAPVAVAAVGA<br>APAGAGAAEEASTFN<br>VILK | ITRAQ4plex@N-term;<br>ITRAQ4plex(K)@35                                                             |                                        | 0.0701  | 3456.9563 | 1153.3260 | 3456.8860 | 1153.3026 | 3 | 56.63 |
|          | 16.28 | 65.4 | GFDSAQ                                      | ITRAQ4plex@N-term;<br>ITRAQ4plex(K)@6                                                              |                                        | 0.0010  | 911.4966  | 456.7556  | 911.4956  | 456.7551  | 2 | 25.44 |
|          | 16.28 | 65.4 | GISAAPVAVAAVGA<br>PAGAGAAEEASTFN<br>VILK    | Carbamyl@N-term;<br>ITRAQ4plex(S)@3;<br>ITRAQ4plex(K)@34                                           | cleaved F-G@N-term                     | -0.0369 | 3352.7866 | 1118.6030 | 3352.8234 | 1118.6151 | 3 | 51.94 |
|          | 16.28 | 65.4 | KFEGAGAQIELK                                | ITRAQ4plex@N-term;<br>ITRAQ4plex(K)@1;<br>ITRAQ4plex(K)@12                                         | missed K-F@1                           | -0.0498 | 1721.9543 | 574.9921  | 1722.0041 | 575.0087  | 3 | 38.79 |
|          | 16.28 | 65.4 | LTLVEAADLVK                                 | ITRAQ4plex@N-term;<br>ITRAQ4plex(K)@11                                                             |                                        | 0.0013  | 1458.8915 | 730.4530  | 1458.8901 | 730.4523  | 2 | 34.17 |
|          | 16.28 | 65.4 | LVREITGLGLADAK                              | ITRAQ4plex@N-term;<br>Oxidation(R)@3; Cation:K(E)@4;<br>ITRAQ4plex(K)@14                           | missed R-E@3                           | 0.0741  | 1797.0747 | 600.0322  | 1797.0006 | 600.0075  | 3 | 33.85 |
|          | 16.28 | 65.4 | REITGLGLADAK                                | ITRAQ4plex@N-term;<br>ITRAQ4plex(K)@12                                                             | cleaved V-R@N-term; missed R-E@1       | 0.0049  | 1530.9022 | 511.3080  | 1530.8973 | 511.3064  | 3 | 31.82 |
|          | 16.28 | 65.4 | STEALLEQIGK                                 | ITRAQ4plex@N-term;<br>ITRAQ4plex(K)@11                                                             | cleaved M-S@N-term                     | -0.0324 | 1475.8115 | 738.9130  | 1475.8439 | 738.9292  | 2 | 32.40 |
| LIC10751 |       |      |                                             |                                                                                                    |                                        |         |           |           |           |           |   |       |
|          | 3.72  | 8.5  | ANQEKIEAVALLK                               | ITRAQ4plex@N-term; No<br>ITRAQ4plex(K)@5;<br>ITRAQ4plex(K)@13                                      | cleaved M-A@N-term; missed K-I@5       | -0.0803 | 1713.9430 | 572.3216  | 1714.0233 | 572.3484  | 3 | 58.93 |
|          | 3.72  | 8.5  | DANGVDAIAGLPSR                              | ITRAQ4plex@N-term                                                                                  | cleaved L-D@N-term                     | 0.0539  | 1498.8401 | 750.4273  | 1498.7862 | 750.4004  | 2 | 43.62 |
|          | 3.72  | 8.5  | EQLLAQIAGGINGPAR                            | ITRAQ4plex@N-term;<br>Deamidated(N)@12                                                             |                                        | -0.0369 | 1751.9283 | 876.9714  | 1751.9652 | 876.9899  | 2 | 54.62 |
|          | 2.26  | 8.5  | IAGLP                                       | ITRAQ4plex@N-term                                                                                  | cleaved A-I@N-term; cleaved P-S@C-term | -0.0002 | 613.3919  | 614.3992  | 613.3921  | 614.3994  | 1 | 50.66 |
|          | 3.72  | 8.5  | IEAVALLK                                    | ITRAQ4plex@N-term;<br>ITRAQ4plex(K)@8                                                              |                                        | -0.0123 | 1143.7347 | 572.8746  | 1143.7471 | 572.8808  | 2 | 51.38 |
|          | 3.72  | 8.5  | TIASGINQIIASLAR                             | No ITRAQ4plex@N-term                                                                               |                                        | -0.0098 | 1526.8683 | 764.4414  | 1526.8780 | 764.4463  | 2 | 40.35 |
|          | 2.26  | 8.5  | VCKDFAKNNK                                  | ITRAQ4plex@N-term;<br>Methylthio(C)@2;<br>ITRAQ4plex(K)@3;<br>ITRAQ4plex(K)@7;<br>ITRAQ4plex(K)@10 | missed K-N@7                           | -0.0371 | 1787.9502 | 596.9907  | 1787.9873 | 597.0031  | 3 | 42.44 |
| LIC10750 |       |      |                                             |                                                                                                    |                                        |         |           |           |           |           |   |       |
|          | 5.93  | 14.3 | GGVVHLGVGK                                  | ITRAQ4plex@N-term;<br>ITRAQ4plex(K)@10                                                             |                                        | 0.0120  | 1209.7557 | 404.2592  | 1209.7437 | 404.2552  | 3 | 29.50 |
|          | 5.93  | 14.3 | GTISLPHGTGK                                 | ITRAQ4plex@N-term;<br>ITRAQ4plex(K)@11                                                             |                                        | -0.0314 | 1354.7498 | 452.5905  | 1354.7812 | 452.6010  | 3 | 28.34 |
|          | 5.93  | 14.3 | IEYRPDK                                     | ITRAQ4plex@N-term;<br>ITRAQ4plex(K)@7                                                              |                                        | -0.0468 | 1207.6337 | 403.5518  | 1207.6805 | 403.5674  | 3 | 28.68 |
|          | 5.43  | 7.8  | LGPI LGR                                    | ITRAQ4plex@N-term                                                                                  |                                        | 0.0113  | 868.5730  | 435.2938  | 868.5616  | 435.2881  | 2 | 41.53 |
|          | 5.93  | 14.3 | PKAGTVTTDVAK                                | Acetyl@N-term;<br>ITRAQ4plex(K)@2;<br>ITRAQ4plex(K)@12                                             | cleaved K-P@N-term; missed K-A@2       | 0.0226  | 1516.8929 | 506.6383  | 1516.8704 | 506.6308  | 3 | 27.45 |
|          | 5.43  | 7.8  | TVVQTLMR                                    | ITRAQ4plex@N-term                                                                                  |                                        | -0.0041 | 1090.6249 | 546.3197  | 1090.6290 | 546.3218  | 2 | 41.81 |
|          | 5.43  | 7.8  | VLVFCCK                                     | ITRAQ4plex@N-term;<br>Methylthio(C)@5;<br>ITRAQ4plex(K)@6                                          |                                        | 0.0239  | 1041.6198 | 521.8171  | 1041.5959 | 521.8052  | 2 | 47.23 |

|          |      |      |                                     |                                                                                                      |                                            |         |           |          |           |          |   |       |
|----------|------|------|-------------------------------------|------------------------------------------------------------------------------------------------------|--------------------------------------------|---------|-----------|----------|-----------|----------|---|-------|
|          | 5.93 | 14.3 | VSFDN TK                            | ITRAQ4plex@N-term;<br>ITRAQ4plex(K)@7                                                                |                                            | 0.0035  | 1097.5996 | 549.8071 | 1097.5961 | 549.8053 | 2 | 28.08 |
|          | 5.93 | 14.3 | VSFDN TKLIENIR                      | ITRAQ4plex@N-term;<br>Oxidation(N)@5;<br>ITRAQ4plex(K)@7;<br>Deamidated(N)@11                        | missed K-L@7                               | -0.0130 | 1853.0009 | 927.5077 | 1853.0138 | 927.5142 | 2 | 38.14 |
| LIC10749 |      |      |                                     |                                                                                                      |                                            |         |           |          |           |          |   |       |
|          | 2    | 6.3  | EAGK                                | No ITRAQ4plex@N-term;<br>ITRAQ4plex(K)@4                                                             | cleaved V-E@N-term                         | -0.0049 | 547.3039  | 548.3112 | 547.3088  | 548.3160 | 1 | 41.87 |
|          | 2    | 7.7  | LPVVITVFSDR                         | ITRAQ4plex@N-term                                                                                    |                                            | -0.0076 | 1388.8074 | 695.4109 | 1388.8149 | 695.4147 | 2 | 48.98 |
|          | 2    | 7.7  | QAGL                                | ITRAQ4plex@N-term;<br>Deamidated(Q)@1                                                                | cleaved G-Q@N-term; cleaved L-N@C-term     | -0.0076 | 532.2902  | 533.2975 | 532.2979  | 533.3051 | 1 | 49.25 |
|          | 2    | 6.3  | SPPAALLVK                           | ITRAQ4plex@N-term;<br>ITRAQ4plex(K)@9                                                                |                                            | 0.0105  | 1182.7686 | 592.3915 | 1182.7580 | 592.3863 | 2 | 29.53 |
|          | 2    | 6.3  | VVIT                                | No ITRAQ4plex@N-term                                                                                 | cleaved P-V@N-term; cleaved T-V@C-term     | 0.0465  | 430.3256  | 431.3329 | 430.2791  | 431.2864 | 1 | 50.24 |
| LIC10525 |      |      |                                     |                                                                                                      |                                            |         |           |          |           |          |   |       |
|          | 6.42 | 22.2 | AEFQNFK                             | ITRAQ4plex@N-term;<br>ITRAQ4plex(K)@7                                                                |                                            | 0.0114  | 1170.6390 | 586.3268 | 1170.6277 | 586.3211 | 2 | 30.42 |
|          | 6.42 | 22.2 | ENEDKFLRPARVR                       | Glu->pyro-Glu@N-term;<br>Deamidated(N)@2;<br>ITRAQ4plex(K)@5;<br>Deamidated(R)@9                     | missed K-F@5; missed R-V@12                | -0.0251 | 1857.9567 | 620.3262 | 1857.9819 | 620.3346 | 3 | 28.33 |
|          | 6.42 | 22.2 | ESAK                                | No ITRAQ4plex@N-term;<br>ITRAQ4plex(K)@4                                                             | cleaved L-E@N-term                         | 0.0381  | 577.3574  | 578.3647 | 577.3193  | 578.3266 | 1 | 56.92 |
|          | 6.42 | 22.2 | LNPIDNLER                           | No ITRAQ4plex@N-term;<br>Oxidation(P)@3                                                              | cleaved F-L@N-term                         | 0.0330  | 1098.6000 | 550.3073 | 1098.5669 | 550.2907 | 2 | 34.25 |
|          | 6.42 | 22.2 | NVIR                                | No ITRAQ4plex@N-term                                                                                 | cleaved S-N@N-term                         | 0.0467  | 500.3538  | 501.3611 | 500.3071  | 501.3144 | 1 | 44.93 |
|          | 6.42 | 22.2 | SAQEFVSIR                           | ITRAQ4plex@N-term                                                                                    |                                            | -0.0194 | 1179.6177 | 590.8161 | 1179.6370 | 590.8258 | 2 | 29.28 |
|          | 6.42 | 22.2 | SLVSGFLNPIDNLER                     | ITRAQ4plex@N-term                                                                                    |                                            | -0.0110 | 1816.9695 | 909.4920 | 1816.9805 | 909.4975 | 2 | 36.32 |
|          | 6.42 | 22.2 | VGATQTNSEELKPFV<br>DGVTMILK         | ITRAQ4plex@N-term;<br>ITRAQ4plex(K)@12;<br>ITRAQ4plex(K)@23                                          |                                            | -0.0107 | 2908.5837 | 970.5352 | 2908.5945 | 970.5388 | 3 | 37.89 |
| LIC10430 |      |      |                                     |                                                                                                      |                                            |         |           |          |           |          |   |       |
|          | 4.11 | 10.8 | AAERAEAK                            | No ITRAQ4plex@N-term;<br>Deamidated(R)@4;<br>ITRAQ4plex(K)@8                                         | cleaved L-A@N-term; missed R-A@4           | 0.0505  | 989.5769  | 495.7957 | 989.5264  | 495.7705 | 2 | 37.47 |
|          | 4    | 16.0 | AEAKGSAADDAKAKK                     | ITRAQ4plex@N-term;<br>ITRAQ4plex(K)@4;<br>ITRAQ4plex(K)@12;<br>ITRAQ4plex(K)@14;<br>ITRAQ4plex(K)@15 | missed K-G@4; missed K-A@12; missed K-K@14 | -0.0551 | 2180.2183 | 727.7467 | 2180.2734 | 727.7651 | 3 | 25.47 |
|          | 4    | 16.0 | ATSGA                               | ITRAQ4plex@N-term                                                                                    | cleaved V-A@N-term; cleaved A-V@C-term     | -0.0322 | 549.2558  | 550.2631 | 549.2880  | 550.2953 | 1 | 49.61 |
|          | 4.11 | 10.8 | GGQFEHIIHEIR                        | ITRAQ4plex@N-term                                                                                    | cleaved T-G@N-term                         | 0.0250  | 1578.8639 | 527.2952 | 1578.8389 | 527.2869 | 3 | 47.54 |
|          | 4    | 16.0 | GSAADDAKAK                          | No ITRAQ4plex@N-term;<br>ITRAQ4plex(K)@8;<br>ITRAQ4plex(K)@10                                        | missed K-A@8                               | -0.0004 | 1220.6602 | 611.3373 | 1220.6604 | 611.3375 | 2 | 51.89 |
|          | 4    | 16.0 | IGIETTGI AK                         | ITRAQ4plex@N-term;<br>ITRAQ4plex(K)@10                                                               |                                            | -0.0179 | 1289.7620 | 645.8882 | 1289.7798 | 645.8972 | 2 | 29.53 |
|          | 4.11 | 10.8 | ISQLK                               | ITRAQ4plex@N-term;<br>ITRAQ4plex(K)@5                                                                |                                            | 0.0109  | 875.5793  | 438.7969 | 875.5684  | 438.7915 | 2 | 36.95 |
|          | 4    | 16.0 | NENNRLRSSGMV PVN<br>IIGGGVATSGAVNEK | ITRAQ4plex@N-term;<br>Deamidated(N)@4;<br>ITRAQ4plex(S)@9;<br>Deamidated(N)@28;<br>ITRAQ4plex(K)@30  | missed R-L@5; missed R-S@7                 | 0.0869  | 3473.9131 | 869.4855 | 3473.8262 | 869.4638 | 4 | 44.87 |
|          | 4    | 16.0 | QNTIHIAVK                           | No ITRAQ4plex@N-term;<br>ITRAQ4plex(K)@6;<br>ITRAQ4plex(K)@10                                        | cleaved S-Q@N-term; missed K-I@6           | -0.0490 | 1438.8374 | 720.4260 | 1438.8864 | 720.4505 | 2 | 47.71 |
|          | 4.11 | 10.8 | QSTL                                | Gln->pyro-Glu@N-term                                                                                 | cleaved L-I@C-term                         | 0.1282  | 430.3345  | 431.3418 | 430.2064  | 431.2136 | 1 | 58.37 |
|          | 4.11 | 10.8 | TGGQFEHIIHEIR                       | Carbamyl@N-term                                                                                      |                                            | 0.0397  | 1578.8300 | 527.2839 | 1578.7903 | 527.2707 | 3 | 50.74 |
|          | 4    | 16.0 | TIPEDLLENTIDVTDL<br>DVGDSIK         | ITRAQ4plex@N-term;<br>ITRAQ4plex(K)@24                                                               |                                            | 0.0090  | 2915.5562 | 972.8593 | 2915.5470 | 972.8563 | 3 | 42.02 |
|          | 4    | 16.0 | VP TSW EILINGDP IVTS<br>VNK         | ITRAQ4plex@N-term;<br>ITRAQ4plex(K)@20                                                               |                                            | -2.0793 | 2467.2930 | 823.4382 | 2469.3723 | 824.1314 | 3 | 53.59 |
| LIC10429 |      |      |                                     |                                                                                                      |                                            |         |           |          |           |          |   |       |
|          | 4    | 9.3  | ANVSEVMNVIGEIEGK                    | ITRAQ4plex@N-term;<br>ITRAQ4plex(K)@16                                                               |                                            | 0.0115  | 1976.0607 | 659.6942 | 1976.0492 | 659.6903 | 3 | 37.46 |
|          | 4    | 9.3  | DALLK                               | ITRAQ4plex@N-term;<br>ITRAQ4plex(K)@5                                                                | cleaved A-D@N-term                         | -0.0106 | 846.5313  | 847.5385 | 846.5418  | 847.5491 | 1 | 57.49 |
|          | 4    | 9.3  | IDDLVIVSPDSGGAER                    | ITRAQ4plex@N-term;<br>ITRAQ4plex(S)@11                                                               |                                            | -0.0345 | 1929.9906 | 966.0026 | 1930.0251 | 966.0198 | 2 | 34.67 |
|          | 4    | 9.3  | IEDNVRGK                            | ITRAQ4plex@N-term;<br>Oxidation(D)@3;<br>Deamidated(N)@4;<br>ITRAQ4plex(K)@8                         | missed R-G@6                               | 0.0282  | 1234.7043 | 618.3594 | 1234.6761 | 618.3453 | 2 | 30.24 |



|              |       |      |                          |                                                                                        |                                                      |         |           |          |           |          |   |       |
|--------------|-------|------|--------------------------|----------------------------------------------------------------------------------------|------------------------------------------------------|---------|-----------|----------|-----------|----------|---|-------|
|              | 6     | 26.6 | DITSLLLDPEGLALTIGTFVNR   | ITRAQ4plex@N-term                                                                      |                                                      | -0.0235 | 2501.3628 | 834.7949 | 2501.3863 | 834.8027 | 3 | 45.09 |
|              | 6     | 26.6 | RTIP                     | No ITRAQ4plex@N-term                                                                   | cleaved I-R@N-term; cleaved P-D@C-term; missed R-T@1 | -0.0071 | 485.2891  | 486.2963 | 485.2962  | 486.3035 | 1 | 33.69 |
|              | 6     | 26.6 | TIPDYPKPGILFR            | ITRAQ4plex@N-term; ITRAQ4plex(K)@7                                                     |                                                      | -0.0139 | 1804.0353 | 602.3524 | 1804.0491 | 602.3570 | 3 | 33.22 |
|              | 6     | 26.6 | VPVFSICEFEGH             | ITRAQ4plex@N-term; Methylthio(C)@7                                                     |                                                      | 0.0101  | 1552.7278 | 777.3712 | 1552.7176 | 777.3661 | 2 | 37.58 |
| LIC2_SPN3825 |       |      |                          |                                                                                        |                                                      |         |           |          |           |          |   |       |
|              | 8     | 16.7 | AAFVLPOFAQK              | ITRAQ4plex@N-term; ITRAQ4plex(K)@11                                                    |                                                      | -0.0067 | 1506.8735 | 754.4440 | 1506.8802 | 754.4474 | 2 | 33.07 |
|              | 8     | 16.7 | GPDPYTVVDPQQR            | ITRAQ4plex@N-term                                                                      |                                                      | -0.0033 | 1583.8032 | 792.9089 | 1583.8066 | 792.9106 | 2 | 29.57 |
|              | 8     | 16.7 | IDVFESVGFGR              | ITRAQ4plex@N-term                                                                      |                                                      | 0.0293  | 1368.7454 | 685.3799 | 1368.7159 | 685.3653 | 2 | 47.03 |
|              | 6.85  | 12.5 | LHSRTTFFQKIDVFESVGFGR    | No ITRAQ4plex@N-term; Deamidated(R)@4; ITRAQ4plex(K)@10                                | cleaved F-L@N-term; missed R-T@4; missed K-I@10      | -0.0209 | 2565.3252 | 856.1157 | 2565.3462 | 856.1227 | 3 | 55.54 |
|              | 8     | 16.7 | RPFYETMANCLK             | ITRAQ4plex@N-term; Methylthio(C)@10; ITRAQ4plex(K)@12                                  |                                                      | 0.0139  | 1805.9009 | 602.9742 | 1805.8870 | 602.9696 | 3 | 36.58 |
|              | 6.85  | 12.5 | VLVIGGGDGGTVR            | ITRAQ4plex@N-term                                                                      |                                                      | -0.0107 | 1342.7583 | 672.3864 | 1342.7690 | 672.3918 | 2 | 40.59 |
|              | 6.85  | 12.5 | YYSAEMHK                 | ITRAQ4plex@N-term; ITRAQ4plex(K)@8                                                     |                                                      | 0.0156  | 1315.6630 | 439.5616 | 1315.6474 | 439.5564 | 3 | 38.74 |
| LIC20266     |       |      |                          |                                                                                        |                                                      |         |           |          |           |          |   |       |
|              | 2.08  | 6.3  | AVLGA                    | No ITRAQ4plex@N-term                                                                   | cleaved V-A@N-term; cleaved A-T@C-term               | -0.0389 | 429.2198  | 430.2271 | 429.2587  | 430.2660 | 1 | 22.77 |
|              | 2.08  | 6.3  | DFSGEPQTLGLPLAPNPVILFR   | ITRAQ4plex@N-term                                                                      |                                                      | -0.0193 | 2524.3618 | 842.4612 | 2524.3811 | 842.4677 | 3 | 40.03 |
|              | 2.08  | 6.3  | EEEDRPOPR                | ITRAQ4plex@N-term                                                                      |                                                      | -0.0117 | 1298.6221 | 433.8813 | 1298.6337 | 433.8852 | 3 | 21.00 |
|              | 2.08  | 6.3  | IEPLK                    | ITRAQ4plex@N-term; ITRAQ4plex(K)@5                                                     | cleaved E-I@N-term                                   | -0.0018 | 886.5713  | 444.2929 | 886.5731  | 444.2938 | 2 | 29.66 |
| LIC10524     |       |      |                          |                                                                                        |                                                      |         |           |          |           |          |   |       |
|              | 47.58 | 38.1 | AADK                     | No ITRAQ4plex@N-term; ITRAQ4plex(K)@4                                                  | cleaved A-A@N-term                                   | -0.0028 | 547.3060  | 548.3133 | 547.3088  | 548.3160 | 1 | 38.83 |
|              | 28.39 | 22.1 | AREAIESNDKAR             | ITRAQ4plex@N-term; Deamidated(N)@8; Oxidation(D)@9; ITRAQ4plex(K)@10; Oxidation(R)@12  | missed R-E@2; missed K-A@10                          | -0.1278 | 1679.7405 | 840.8775 | 1679.8682 | 840.9414 | 2 | 35.30 |
|              | 47.58 | 38.1 | AREAIESNDKARIESAK        | ITRAQ4plex@N-term; Oxidation(D)@9; ITRAQ4plex(K)@10; Oxidation(R)@12; ITRAQ4plex(K)@17 | missed R-E@2; missed K-A@10; missed R-I@12           | -0.0573 | 2351.2197 | 784.7472 | 2351.2770 | 784.7663 | 3 | 39.33 |
|              | 47.58 | 38.1 | ASDINEVILVGSIR           | ITRAQ4plex@N-term                                                                      |                                                      | 0.0127  | 1685.9562 | 843.9854 | 1685.9434 | 843.9790 | 2 | 46.79 |
|              | 47.58 | 38.1 | AVITVPAYFNDEQR           | ITRAQ4plex@N-term                                                                      |                                                      | -0.0108 | 1765.9012 | 883.9579 | 1765.9121 | 883.9633 | 2 | 32.38 |
|              | 47.58 | 38.1 | DAEAHAAADK               | ITRAQ4plex@N-term; ITRAQ4plex(K)@10                                                    |                                                      | -0.0207 | 1285.6300 | 429.5506 | 1285.6506 | 429.5575 | 3 | 25.96 |
|              | 47.58 | 38.1 | DLIGIPPAPR               | ITRAQ4plex@N-term                                                                      | cleaved F-D@N-term                                   | 0.0083  | 1191.7180 | 596.8663 | 1191.7097 | 596.8621 | 2 | 31.23 |
|              | 28.39 | 22.1 | ELAD                     | Glu->pyro-Glu@N-term                                                                   | cleaved L-E@N-term; cleaved D-G@C-term               | -0.1042 | 428.0865  | 429.0938 | 428.1907  | 429.1980 | 1 | 59.10 |
|              | 47.58 | 38.1 | ESSSGLSEDEIQK            | ITRAQ4plex@N-term; ITRAQ4plex(K)@13                                                    | cleaved I-E@N-term                                   | 0.0004  | 1695.8411 | 848.9278 | 1695.8407 | 848.9276 | 2 | 27.54 |
|              | 47.58 | 38.1 | FDLIGIPPAPR              | ITRAQ4plex@N-term                                                                      |                                                      | -0.0268 | 1338.7513 | 670.3829 | 1338.7782 | 670.3964 | 2 | 33.70 |
|              | 28.39 | 22.1 | FDQLTK                   | ITRAQ4plex@N-term; ITRAQ4plex(K)@6                                                     |                                                      | 0.0038  | 1038.5992 | 520.3069 | 1038.5953 | 520.3049 | 2 | 38.80 |
|              | 47.58 | 38.1 | FDQLTKSLVDRTRIPCENALR    | ITRAQ4plex@N-term; ITRAQ4plex(K)@6; Methylthio(C)@16; Deamidated(N)@18                 | missed K-S@6; missed R-T@11; missed R-I@13           | 0.0846  | 2809.5669 | 703.3990 | 2809.4822 | 703.3778 | 4 | 40.68 |
|              | 47.58 | 38.1 | FETSAGEFTPOEISAR         | ITRAQ4plex@N-term                                                                      |                                                      | -0.0649 | 1912.8640 | 957.4393 | 1912.9289 | 957.4717 | 2 | 31.50 |
|              | 47.58 | 38.1 | GETLIQQFAK               | ITRAQ4plex@N-term; ITRAQ4plex(K)@10                                                    |                                                      | -0.0061 | 1350.7690 | 676.3918 | 1350.7751 | 676.3948 | 2 | 31.15 |
|              | 47.58 | 38.1 | GGSSIR                   | ITRAQ4plex@N-term                                                                      | cleaved V-G@N-term                                   | -0.0060 | 632.3668  | 633.3740 | 632.3728  | 633.3800 | 1 | 51.34 |
|              | 28.39 | 22.1 | HLDMLTR                  | ITRAQ4plex@N-term                                                                      |                                                      | 0.0002  | 1129.6038 | 565.8091 | 1129.6036 | 565.8091 | 2 | 40.44 |
|              | 28.39 | 22.1 | IAGLEVER                 | ITRAQ4plex@N-term                                                                      |                                                      | 0.0141  | 1029.6082 | 515.8113 | 1029.5940 | 515.8043 | 2 | 39.87 |
|              | 47.58 | 38.1 | IATDIASK                 | ITRAQ4plex@N-term; ITRAQ4plex(K)@8                                                     |                                                      | 0.0075  | 1105.6661 | 553.8403 | 1105.6587 | 553.8366 | 2 | 28.17 |
|              | 47.58 | 38.1 | IELSGTMSTQINLPFITADASGPK | ITRAQ4plex@N-term; ITRAQ4plex(K)@24                                                    |                                                      | -0.0031 | 2778.4688 | 927.1635 | 2778.4717 | 927.1645 | 3 | 54.04 |
|              | 47.58 | 38.1 | IESSSGLSEDEIQK           | ITRAQ4plex@N-term; ITRAQ4plex(K)@14                                                    |                                                      | -0.0135 | 1808.9113 | 905.4629 | 1808.9247 | 905.4696 | 2 | 28.70 |
|              | 47.58 | 38.1 | IGANEK                   | ITRAQ4plex@N-term; ITRAQ4plex(K)@6                                                     |                                                      | -0.0079 | 918.5299  | 460.2722 | 918.5378  | 460.2762 | 2 | 23.60 |

|       |      |                                           |                                                                                                                        |                                                                          |         |           |           |           |           |   |       |
|-------|------|-------------------------------------------|------------------------------------------------------------------------------------------------------------------------|--------------------------------------------------------------------------|---------|-----------|-----------|-----------|-----------|---|-------|
| 47.58 | 38.1 | IGANEKQLATDEIKRA<br>REAIESNDKAR           | ITRAQ4plex@N-term;<br>ITRAQ4plex(K)@6;<br>ITRAQ4plex(K)@14;<br>Oxidation(R)@17;<br>ITRAQ4plex(K)@25                    | missed K-Q@6; missed K-R@14; missed R-A@15; missed R-E@17; missed K-A@25 | 0.0125  | 3618.0061 | 905.5088  | 3617.9936 | 905.5057  | 4 | 52.63 |
| 47.58 | 38.1 | IIGIDLGTNSVSVME<br>GGDPVVIQNSEGAR         | ITRAQ4plex@N-term;<br>Deamidated(N)@26                                                                                 |                                                                          | 0.0638  | 3271.7363 | 1091.5860 | 3271.6728 | 1091.5649 | 3 | 54.61 |
| 47.58 | 38.1 | IINEPTAAALAYGFDK                          | ITRAQ4plex@N-term;<br>ITRAQ4plex(K)@16                                                                                 |                                                                          | 0.0081  | 1981.0845 | 661.3688  | 1981.0764 | 661.3661  | 3 | 34.07 |
| 47.58 | 38.1 | IINEPTAAALAYGFDK                          | ITRAQ4plex@N-term;<br>ITRAQ4plex(K)@16;<br>ITRAQ4plex(K)@17                                                            | missed K-K@16                                                            | -0.0095 | 2253.2639 | 752.0953  | 2253.2734 | 752.0984  | 3 | 33.93 |
| 47.58 | 38.1 | IPAVQELVK                                 | ITRAQ4plex@N-term;<br>ITRAQ4plex(K)@9                                                                                  |                                                                          | -0.0141 | 1283.7916 | 642.9031  | 1283.8057 | 642.9101  | 2 | 31.36 |
| 47.58 | 38.1 | IPCENALR                                  | ITRAQ4plex@N-term;<br>Methylthio(C)@3                                                                                  |                                                                          | 0.0043  | 1104.5585 | 553.2865  | 1104.5542 | 553.2844  | 2 | 31.19 |
| 28.39 | 22.1 | ISADK                                     | ITRAQ4plex@N-term;<br>ITRAQ4plex(K)@5                                                                                  | cleaved D-I@N-term                                                       | 0.0117  | 820.5016  | 411.2581  | 820.4898  | 411.2522  | 2 | 40.92 |
| 47.58 | 38.1 | LATDEIKR                                  | ITRAQ4plex@N-term;<br>ITRAQ4plex(K)@7                                                                                  | cleaved Q-L@N-term; missed K-R@7                                         | -0.0136 | 1232.7196 | 411.9138  | 1232.7332 | 411.9183  | 3 | 28.45 |
| 28.39 | 22.1 | LDMTLTR                                   | ITRAQ4plex@N-term                                                                                                      | cleaved H-L@N-term                                                       | 0.0098  | 992.5545  | 497.2845  | 992.5447  | 497.2796  | 2 | 41.12 |
| 47.58 | 38.1 | MVKDAEAHAAADKAR                           | ITRAQ4plex@N-term;<br>ITRAQ4plex(K)@3;<br>ITRAQ4plex(K)@13                                                             | missed K-A@13                                                            | -0.0271 | 2143.1262 | 715.3827  | 2143.1533 | 715.3917  | 3 | 43.72 |
| 47.58 | 38.1 | NALR                                      | ITRAQ4plex@N-term                                                                                                      | cleaved E-N@N-term                                                       | 0.0816  | 616.4594  | 617.4667  | 616.3778  | 617.3851  | 1 | 55.94 |
| 47.58 | 38.1 | NELDTLYSLEK                               | ITRAQ4plex@N-term;<br>ITRAQ4plex(K)@12                                                                                 |                                                                          | -0.0092 | 1712.8984 | 857.4565  | 1712.9076 | 857.4611  | 2 | 32.82 |
| 47.58 | 38.1 | NQAITNAVNTIR                              | No ITRAQ4plex@N-term;<br>Deamidated(N)@9                                                                               |                                                                          | 0.0080  | 1314.6971 | 658.3558  | 1314.6892 | 658.3519  | 2 | 29.39 |
| 47.58 | 38.1 | NQTGIDISADK                               | ITRAQ4plex@N-term;<br>ITRAQ4plex(K)@11                                                                                 |                                                                          | -0.0030 | 1448.7684 | 725.3915  | 1448.7715 | 725.3930  | 2 | 27.75 |
| 47.58 | 38.1 | NQTGIDISADKNTVQR                          | ITRAQ4plex@N-term;<br>ITRAQ4plex(K)@11                                                                                 | missed K-N@11                                                            | -0.0138 | 2047.0764 | 683.3661  | 2047.0902 | 683.3707  | 3 | 28.64 |
| 28.39 | 22.1 | NTIR                                      | ITRAQ4plex@N-term                                                                                                      | cleaved V-N@N-term                                                       | 0.0593  | 646.4477  | 647.4550  | 646.3884  | 647.3957  | 1 | 58.60 |
| 47.58 | 38.1 | NTTIPTKK                                  | ITRAQ4plex@N-term;<br>ITRAQ4plex(K)@7;<br>ITRAQ4plex(K)@8                                                              | missed K-K@7                                                             | -0.0665 | 1333.7629 | 445.5949  | 1333.8295 | 445.6171  | 3 | 27.33 |
| 47.58 | 38.1 | PFITADASGPK                               | No ITRAQ4plex@N-term;<br>ITRAQ4plex(K)@11                                                                              | cleaved L-P@N-term                                                       | 0.0205  | 1246.6885 | 624.3515  | 1246.6679 | 624.3412  | 2 | 47.10 |
| 47.58 | 38.1 | PVVIQNSEGAR                               | No ITRAQ4plex@N-term                                                                                                   | cleaved D-P@N-term                                                       | -0.0013 | 1168.6188 | 585.3167  | 1168.6200 | 585.3173  | 2 | 24.32 |
| 47.58 | 38.1 | QATKDAGRIAGLEVER                          | ITRAQ4plex@N-term;<br>Deamidated(Q)@1;<br>ITRAQ4plex(K)@4                                                              | missed R-I@8                                                             | -0.0759 | 2002.0292 | 668.3503  | 2002.1051 | 668.3756  | 3 | 38.44 |
| 47.58 | 38.1 | QGGVLAGEVSDVLL                            | ITRAQ4plex@N-term;<br>Deamidated(Q)@1                                                                                  | cleaved I-Q@N-term; cleaved L-L@C-term                                   | 0.0320  | 1500.8478 | 751.4312  | 1500.8157 | 751.4151  | 2 | 42.55 |
| 47.58 | 38.1 | QLATDEIKR                                 | ITRAQ4plex@N-term;<br>ITRAQ4plex(K)@8                                                                                  | missed K-R@8                                                             | 0.0118  | 1360.8036 | 454.6085  | 1360.7918 | 454.6045  | 3 | 27.42 |
| 47.58 | 38.1 | QTAEDYLGQK                                | ITRAQ4plex@N-term;<br>ITRAQ4plex(K)@10                                                                                 |                                                                          | -0.0129 | 1439.7372 | 720.8759  | 1439.7500 | 720.8823  | 2 | 28.02 |
| 28.39 | 22.1 | QVFGKEPNK                                 | Gln->pyro-Glu@N-term;<br>ITRAQ4plex(K)@5;<br>ITRAQ4plex(K)@9                                                           |                                                                          | -0.0095 | 1316.7238 | 659.3691  | 1316.7332 | 659.3739  | 2 | 38.15 |
| 47.58 | 38.1 | RIPAVQELVK                                | ITRAQ4plex@N-term;<br>Oxidation(R)@1;<br>ITRAQ4plex(K)@10                                                              | cleaved I-R@N-term; missed R-I@1                                         | -0.0718 | 1455.8298 | 486.2839  | 1455.9017 | 486.3078  | 3 | 40.08 |
| 47.58 | 38.1 | SAPGAEQAAAGGPN<br>GGAGSNDQGNSTNN<br>GEK   | ITRAQ4plex@N-term;<br>Deamidated(N)@28;<br>ITRAQ4plex(K)@31                                                            | cleaved Q-S@N-term                                                       | 0.1035  | 3073.4849 | 1025.5020 | 3073.3813 | 1025.4677 | 3 | 23.96 |
| 47.58 | 38.1 | SQSAPGAEQAAAGG<br>PNGGAGSNDQGNST<br>NNGEK | ITRAQ4plex@N-term;<br>Deamidated(N)@16;<br>Deamidated(N)@30;<br>ITRAQ4plex(K)@33                                       | cleaved Y-S@N-term                                                       | -0.0172 | 3289.4387 | 1097.4870 | 3289.4559 | 1097.4926 | 3 | 23.85 |
| 47.58 | 38.1 | SQVFSTAADNQSASV<br>HVLQGER                | ITRAQ4plex@N-term                                                                                                      |                                                                          | 0.0093  | 2587.3206 | 863.4474  | 2587.3112 | 863.4444  | 3 | 58.86 |
| 28.39 | 22.1 | TTPSIVAF TAK                              | ITRAQ4plex@N-term;<br>Methyl(T)@2;<br>ITRAQ4plex(K)@11                                                                 |                                                                          | -0.0361 | 1436.8121 | 719.4133  | 1436.8482 | 719.4314  | 2 | 44.27 |
| 47.58 | 38.1 | TVNEAGDKIGANEK                            | ITRAQ4plex@N-term;<br>Deamidated(N)@3;<br>Oxidation(D)@7;<br>ITRAQ4plex(K)@8;<br>Deamidated(N)@12;<br>ITRAQ4plex(K)@14 | missed K-I@8                                                             | 0.1267  | 1895.1117 | 632.7112  | 1894.9849 | 632.6689  | 3 | 42.45 |
| 47.58 | 38.1 | VVDADYTVVDEKK                             | ITRAQ4plex@N-term;<br>ITRAQ4plex(K)@13;<br>ITRAQ4plex(K)@14                                                            | missed K-K@13                                                            | -0.0080 | 2027.0709 | 676.6976  | 2027.0788 | 676.7002  | 3 | 30.12 |



|          |       |      |                                             |                                                                                                       |                                        |         |           |           |           |           |   |       |
|----------|-------|------|---------------------------------------------|-------------------------------------------------------------------------------------------------------|----------------------------------------|---------|-----------|-----------|-----------|-----------|---|-------|
|          | 47.58 | 38.1 | VYSQSAPGAEQAAAG<br>GPNGGAGSNDQGNS<br>TNNGEK | ITRAQ4plex@N-term;<br>Deamidated(N)@28;<br>Deamidated(N)@31;<br>Deamidated(N)@32;<br>ITRAQ4plex(K)@35 |                                        | -0.0332 | 3552.5386 | 1185.1870 | 3552.5717 | 1185.1978 | 3 | 27.27 |
| LIC10733 |       |      |                                             |                                                                                                       |                                        |         |           |           |           |           |   |       |
|          | 6.02  | 8.3  | DAAK                                        | No ITRAQ4plex@N-term;<br>ITRAQ4plex(K)@4                                                              | cleaved Q-D@N-term                     | 0.0013  | 547.3101  | 548.3174  | 547.3088  | 548.3160  | 1 | 44.19 |
|          | 6.02  | 8.3  | ENSKKIGNVSFILQDA<br>AK                      | No ITRAQ4plex@N-term;<br>ITRAQ4plex(K)@4;<br>ITRAQ4plex(K)@5;<br>Deamidated(N)@8;<br>ITRAQ4plex(K)@18 | missed K-K@4; missed K-I@5             | -0.1305 | 2394.2178 | 799.0799  | 2394.3484 | 799.1234  | 3 | 58.71 |
|          | 6.02  | 8.3  | GVAQHFFQFGEK                                | ITRAQ4plex@N-term;<br>ITRAQ4plex(K)@12                                                                |                                        | 0.0079  | 1681.8898 | 561.6372  | 1681.8820 | 561.6346  | 3 | 33.03 |
|          | 6.02  | 8.3  | IADIR                                       | No ITRAQ4plex@N-term                                                                                  | cleaved D-I@N-term                     | 0.0082  | 586.3521  | 587.3594  | 586.3439  | 587.3511  | 1 | 54.24 |
|          | 4.04  | 5.3  | IYLGLETGSK                                  | ITRAQ4plex@N-term;<br>ITRAQ4plex(K)@11                                                                |                                        | -0.0078 | 1480.8667 | 741.4406  | 1480.8745 | 741.4445  | 2 | 49.29 |
|          | 4.04  | 5.3  | ISIGK                                       | ITRAQ4plex@N-term;<br>ITRAQ4plex(K)@5                                                                 | cleaved Q-I@N-term                     | 0.0044  | 804.5357  | 403.2751  | 804.5313  | 403.2729  | 2 | 38.14 |
|          | 6.02  | 8.3  | ITVFDEPQLKK                                 | ITRAQ4plex@N-term;<br>Oxidation(D)@5; Oxidation(P)@7<br>ITRAQ4plex(K)@10;<br>ITRAQ4plex(K)@11         | missed K-K@10                          | -0.0063 | 1781.0237 | 594.6818  | 1781.0300 | 594.6839  | 3 | 51.34 |
|          | 6.02  | 8.3  | IWEMPLWEEYSEDLK                             | ITRAQ4plex@N-term;<br>ITRAQ4plex(K)@15                                                                |                                        | 0.0056  | 2255.1118 | 752.7112  | 2255.1064 | 752.7094  | 3 | 38.20 |
|          | 4.04  | 5.3  | LGLGV                                       | ITRAQ4plex@N-term                                                                                     | cleaved E-L@N-term; cleaved V-P@C-term | 0.0188  | 601.4109  | 602.4182  | 601.3921  | 602.3994  | 1 | 53.62 |
|          | 6.02  | 8.3  | LQLLLK                                      | ITRAQ4plex@N-term;<br>ITRAQ4plex(K)@6                                                                 |                                        | -0.0062 | 1014.6983 | 508.3564  | 1014.7045 | 508.3595  | 2 | 59.44 |
|          | 4.04  | 5.3  | LVLGDVLSYVVK                                | ITRAQ4plex@N-term;<br>ITRAQ4plex(K)@12                                                                |                                        | 0.0042  | 1549.9365 | 775.9755  | 1549.9323 | 775.9734  | 2 | 50.40 |
|          | 6.02  | 8.3  | MILLETPVKPITK                               | ITRAQ4plex@N-term;<br>ITRAQ4plex(K)@10;<br>ITRAQ4plex(K)@14                                           |                                        | -0.0058 | 2077.2527 | 693.4249  | 2077.2586 | 693.4268  | 3 | 35.06 |
|          | 6.02  | 8.3  | TKFSFQTASGIFTGEN<br>GQIFTDEVEK              | ITRAQ4plex@N-term;<br>ITRAQ4plex(K)@2;<br>ITRAQ4plex(T)@21;<br>ITRAQ4plex(K)@26                       | missed K-F@2                           | 0.0222  | 3456.8123 | 865.2103  | 3456.7900 | 865.2048  | 4 | 51.29 |
| LIC10763 |       |      |                                             |                                                                                                       |                                        |         |           |           |           |           |   |       |
|          | 2     | 1.5  | GLSDNLK                                     | ITRAQ4plex@N-term;<br>Deamidated(N)@5;<br>ITRAQ4plex(K)@7                                             |                                        | 0.0147  | 1034.6000 | 518.3073  | 1034.5852 | 518.2999  | 2 | 37.52 |
|          | 2     | 1.5  | IESLVQK                                     | ITRAQ4plex@N-term;<br>ITRAQ4plex(K)@7                                                                 |                                        | -0.0476 | 1103.6318 | 552.8232  | 1103.6794 | 552.8470  | 2 | 29.89 |
|          | 2     | 1.5  | LQSSTPAGTGSYDSK                             | ITRAQ4plex@N-term;<br>ITRAQ4plex(K)@15                                                                |                                        | -0.0012 | 1785.8977 | 893.9561  | 1785.8988 | 893.9567  | 2 | 27.10 |
|          | 2     | 1.5  | NNNQISSQVR                                  | No ITRAQ4plex@N-term                                                                                  |                                        | 0.0916  | 1286.7244 | 644.3694  | 1286.6327 | 644.3236  | 2 | 44.75 |
|          | 2     | 1.5  | RLGK                                        | No ITRAQ4plex@N-term;<br>ITRAQ4plex(K)@4                                                              | cleaved T-R@N-term; missed R-L@1       | 0.0452  | 616.4594  | 617.4667  | 616.4142  | 617.4215  | 1 | 55.94 |
|          | 2     | 1.5  | SFLK                                        | No ITRAQ4plex@N-term;<br>ITRAQ4plex(K)@4                                                              | cleaved S-S@N-term                     | -0.0048 | 637.3873  | 638.3946  | 637.3921  | 638.3994  | 1 | 56.42 |
|          | 2     | 1.5  | SGIS                                        | ITRAQ4plex@N-term                                                                                     | cleaved L-S@N-term; cleaved S-Y@C-term | 0.0077  | 506.2899  | 507.2972  | 506.2822  | 507.2895  | 1 | 54.73 |
|          | 2     | 1.5  | TAFR                                        | ITRAQ4plex@N-term                                                                                     |                                        | 0.0277  | 637.3947  | 638.4019  | 637.3669  | 638.3742  | 1 | 56.31 |
|          | 2     | 1.5  | TESVQNLNLK                                  | ITRAQ4plex@N-term;<br>Deamidated(N)@6;<br>Deamidated(N)@8;<br>ITRAQ4plex(K)@10                        | cleaved L-T@N-term                     | 0.0346  | 1434.8156 | 718.4150  | 1434.7810 | 718.3978  | 2 | 53.28 |
|          | 2     | 1.5  | TTDLEVVGK                                   | ITRAQ4plex@N-term;<br>ITRAQ4plex(K)@9                                                                 |                                        | -0.0119 | 1248.7050 | 417.2423  | 1248.7169 | 417.2462  | 3 | 28.97 |
|          | 2     | 1.5  | VIEIYK                                      | No ITRAQ4plex@N-term;<br>ITRAQ4plex(K)@6                                                              |                                        | 0.0172  | 907.5673  | 454.7909  | 907.5501  | 454.7823  | 2 | 14.64 |
|          | 2     | 1.5  | VQFK                                        | ITRAQ4plex@N-term;<br>ITRAQ4plex(K)@4                                                                 | cleaved M-V@N-term; cleaved K-P@C-term | 0.0016  | 808.5067  | 405.2606  | 808.5051  | 405.2598  | 2 | 29.09 |
|          | 2     | 1.5  | VSLMTGLNVDK                                 | ITRAQ4plex@N-term;<br>ITRAQ4plex(T)@5;<br>ITRAQ4plex(K)@11                                            |                                        | -0.0128 | 1607.9154 | 536.9791  | 1607.9282 | 536.9833  | 3 | 39.41 |
| LIC10800 |       |      |                                             |                                                                                                       |                                        |         |           |           |           |           |   |       |
|          | 4     | 9.8  | AGEFAK                                      | ITRAQ4plex@N-term;<br>ITRAQ4plex(K)@6                                                                 | cleaved E-A@N-term                     | -0.0024 | 909.5140  | 455.7643  | 909.5164  | 455.7655  | 2 | 27.80 |
|          | 4     | 9.8  | ATATASAVFAIAGTR                             | ITRAQ4plex@N-term;<br>Oxidation(F)@9                                                                  |                                        | -0.0878 | 1566.7610 | 784.3878  | 1566.8488 | 784.4317  | 2 | 29.82 |
|          | 4     | 9.8  | ELLNFK                                      | ITRAQ4plex@N-term;<br>ITRAQ4plex(K)@6                                                                 | cleaved K-P@C-term                     | 0.0198  | 1050.6516 | 526.3331  | 1050.6317 | 526.3231  | 2 | 53.19 |

|          |       |      |                    |                                                                                                       |                                                      |         |           |          |           |          |   |       |
|----------|-------|------|--------------------|-------------------------------------------------------------------------------------------------------|------------------------------------------------------|---------|-----------|----------|-----------|----------|---|-------|
|          | 4     | 9.8  | IAAEAAHQAK         | ITRAQ4plex@N-term;<br>ITRAQ4plex(K)@10                                                                |                                                      | 0.0119  | 1296.7513 | 433.2577 | 1296.7394 | 433.2537 | 3 | 26.42 |
|          | 4     | 9.8  | IPWVLDPVAVGALGFR   | ITRAQ4plex@N-term                                                                                     |                                                      | -0.0045 | 1853.0640 | 927.5392 | 1853.0685 | 927.5415 | 2 | 39.68 |
|          | 4     | 9.8  | LAGT               | ITRAQ4plex@N-term                                                                                     | cleaved A-L@N-term; cleaved T-D@C-term               | 0.0087  | 504.3117  | 505.3189 | 504.3029  | 505.3102 | 1 | 56.14 |
|          | 4     | 9.8  | SKTTIERIWPAAK      | No ITRAQ4plex@N-term;<br>ITRAQ4plex(K)@2;<br>Deamidated(R)@8;<br>Oxidation(P)@11;<br>ITRAQ4plex(K)@13 | cleaved M-S@N-term; missed K-T@2;<br>missed R-I@8    | 0.0034  | 1847.0793 | 616.7004 | 1847.0760 | 616.6993 | 3 | 32.55 |
| LIC10851 |       |      |                    |                                                                                                       |                                                      |         |           |          |           |          |   |       |
|          | 4.92  | 10.1 | ALEENNADIEK        | ITRAQ4plex@N-term;<br>ITRAQ4plex(K)@11                                                                |                                                      | -0.0042 | 1532.7885 | 767.4015 | 1532.7926 | 767.4036 | 2 | 27.29 |
|          | 4.92  | 10.1 | FGENITIAR          | ITRAQ4plex@N-term                                                                                     |                                                      | -0.0221 | 1163.6200 | 582.8173 | 1163.6421 | 582.8283 | 2 | 29.51 |
|          | 4.92  | 10.1 | RTSA               | ITRAQ4plex@N-term                                                                                     | cleaved E-R@N-term; cleaved A-G@C-term; missed R-T@1 | 0.0269  | 577.3574  | 578.3647 | 577.3306  | 578.3378 | 1 | 56.92 |
|          | 4.92  | 10.1 | SQLEAEGK           | ITRAQ4plex@N-term;<br>ITRAQ4plex(K)@8                                                                 |                                                      | -0.0072 | 1148.6208 | 575.3177 | 1148.6281 | 575.3213 | 2 | 24.92 |
|          | 4.92  | 10.1 | VVSYIHGNGK         | ITRAQ4plex@N-term;<br>ITRAQ4plex(K)@10                                                                |                                                      | 0.0266  | 1360.7972 | 454.6064 | 1360.7707 | 454.5975 | 3 | 35.80 |
|          | 4.92  | 10.1 | YISEVCLVNQAFFK     | ITRAQ4plex@N-term;<br>Methylthio(C)@6;<br>Deamidated(N)@9;<br>ITRAQ4plex(K)@14                        |                                                      | 0.0648  | 1995.0737 | 666.0319 | 1995.0089 | 666.0103 | 3 | 53.80 |
|          | 3.7   | 9.5  | AAVTDLIR           | No ITRAQ4plex@N-term                                                                                  | cleaved M-A@N-term                                   | 0.0081  | 958.5529  | 480.2837 | 958.5447  | 480.2796 | 2 | 43.63 |
|          | 3.7   | 9.5  | AITWLR             | ITRAQ4plex@N-term                                                                                     |                                                      | 0.0061  | 902.5521  | 452.2833 | 902.5460  | 452.2803 | 2 | 43.42 |
|          | 3.7   | 9.5  | EALGK              | ITRAQ4plex@N-term;<br>ITRAQ4plex(K)@5                                                                 | cleaved F-E@N-term                                   | 0.0408  | 804.5357  | 403.2751 | 804.4949  | 403.2547 | 2 | 38.14 |
| LIC11101 |       |      |                    |                                                                                                       |                                                      |         |           |          |           |          |   |       |
|          | 10.73 | 9.3  | ALINLIQK           | ITRAQ4plex@N-term;<br>ITRAQ4plex(K)@8                                                                 |                                                      | -0.0001 | 1199.7844 | 600.8995 | 1199.7845 | 600.8995 | 2 | 45.51 |
|          | 4.8   | 4.1  | APNRAMLRL          | ITRAQ4plex@N-term;<br>Dethiomethyl(M)@6                                                               | missed R-A@4                                         | 0.0302  | 1023.6362 | 512.8254 | 1023.6059 | 512.8102 | 2 | 47.18 |
|          | 4.8   | 4.1  | DMPDLVPNQTIIVR     | ITRAQ4plex@N-term                                                                                     |                                                      | -0.0133 | 1640.8545 | 821.4345 | 1640.8678 | 821.4412 | 2 | 32.13 |
|          | 10.73 | 9.3  | FNAGK              | ITRAQ4plex@N-term;<br>ITRAQ4plex(K)@5                                                                 |                                                      | 0.0294  | 823.5090  | 412.7617 | 823.4796  | 412.7471 | 2 | 39.80 |
|          | 10.73 | 9.3  | GNLAPDGAVAK        | ITRAQ4plex@N-term;<br>ITRAQ4plex(K)@11                                                                |                                                      | 0.0023  | 1299.7413 | 650.8779 | 1299.7390 | 650.8768 | 2 | 35.69 |
|          | 4.8   | 4.1  | KPGDVIIIR          | ITRAQ4plex@N-term;<br>ITRAQ4plex(K)@2                                                                 |                                                      | -0.0186 | 1410.8979 | 471.3066 | 1410.9166 | 471.3128 | 3 | 32.34 |
|          | 10.73 | 9.3  | ISGLK              | ITRAQ4plex@N-term;<br>ITRAQ4plex(K)@5                                                                 |                                                      | 0.0044  | 804.5357  | 403.2751 | 804.5313  | 403.2729 | 2 | 38.14 |
|          | 10.73 | 9.3  | ISITGPAK           | ITRAQ4plex@N-term;<br>ITRAQ4plex(K)@8                                                                 |                                                      | 0.0022  | 1073.6711 | 537.8428 | 1073.6688 | 537.8417 | 2 | 38.70 |
|          | 10.73 | 9.3  | ISREEFIR           | Carbamyl@N-term                                                                                       | missed R-E@3                                         | 0.0037  | 1091.5760 | 546.7953 | 1091.5724 | 546.7935 | 2 | 41.00 |
|          | 10.73 | 9.3  | IYGT               | ITRAQ4plex@N-term                                                                                     | cleaved Q-I@N-term; cleaved T-I@C-term               | 0.0027  | 596.3318  | 597.3391 | 596.3292  | 597.3364 | 1 | 59.75 |
|          | 4.8   | 4.1  | LVQSATNGAITNL      | ITRAQ4plex@N-term                                                                                     | cleaved L-L@C-term                                   | 0.0097  | 1444.8104 | 482.6107 | 1444.8007 | 482.6075 | 3 | 44.48 |
|          | 10.73 | 9.3  | SSMTTDGDNRAPNR     | ITRAQ4plex@N-term                                                                                     | missed R-A@10                                        | 0.0251  | 1664.7909 | 555.9376 | 1664.7658 | 555.9292 | 3 | 33.17 |
|          | 4.8   | 4.1  | SWKPIEPR           | ITRAQ4plex@N-term;<br>ITRAQ4plex(K)@3                                                                 |                                                      | -0.0087 | 1299.7456 | 434.2558 | 1299.7543 | 434.2587 | 3 | 30.63 |
|          | 10.73 | 9.3  | VGGVHGVMMK         | ITRAQ4plex@N-term;<br>ITRAQ4plex(K)@9                                                                 |                                                      | 0.0000  | 1170.6787 | 586.3466 | 1170.6787 | 586.3466 | 2 | 39.45 |
|          | 10.73 | 9.3  | VIIIR              | No ITRAQ4plex@N-term                                                                                  | cleaved D-V@N-term                                   | 0.0072  | 612.4395  | 613.4467 | 612.4323  | 613.4396 | 1 | 49.59 |
|          | 10.73 | 9.3  | VVLV               | ITRAQ4plex@N-term                                                                                     | cleaved T-V@N-term; cleaved V-L@C-term               | 0.0053  | 572.4072  | 573.4145 | 572.4019  | 573.4092 | 1 | 58.63 |
| LIC11453 |       |      |                    |                                                                                                       |                                                      |         |           |          |           |          |   |       |
|          | 4     | 6.3  | EDLSSTLALVKPIVEDVK | ITRAQ4plex@N-term;<br>ITRAQ4plex(K)@11;<br>ITRAQ4plex(K)@18                                           |                                                      | 0.0055  | 2387.3945 | 796.8054 | 2387.3889 | 796.8036 | 3 | 37.62 |
|          | 4     | 6.3  | EIIIHGNGK          | ITRAQ4plex@N-term;<br>ITRAQ4plex(K)@8                                                                 |                                                      | -0.0004 | 1210.7274 | 404.5831 | 1210.7277 | 404.5832 | 3 | 50.37 |
|          | 4     | 6.3  | GVST               | ITRAQ4plex@N-term                                                                                     | cleaved L-G@N-term; cleaved T-F@C-term               | 0.0213  | 506.3035  | 507.3108 | 506.2822  | 507.2895 | 1 | 57.37 |
|          | 4     | 6.3  | LKTALVK            | ITRAQ4plex@N-term;<br>ITRAQ4plex(K)@2;<br>Phospho(T)@3;<br>ITRAQ4plex(K)@7                            | missed K-T@2                                         | 0.0237  | 1283.8181 | 642.9163 | 1283.7943 | 642.9044 | 2 | 31.29 |
|          | 4     | 6.3  | NIQIVTPPR          | ITRAQ4plex@N-term                                                                                     |                                                      | 0.0047  | 1180.7097 | 591.3621 | 1180.7050 | 591.3598 | 2 | 28.94 |
|          | 4     | 6.3  | SLAQK              | ITRAQ4plex@N-term;<br>ITRAQ4plex(K)@5                                                                 | cleaved L-S@N-term                                   | 0.0751  | 833.5966  | 417.8055 | 833.5214  | 417.7680 | 2 | 17.67 |
| LIC11559 |       |      |                    |                                                                                                       |                                                      |         |           |          |           |          |   |       |
|          | 2.24  | 7.2  | IFPLFSPK           | ITRAQ4plex@N-term;<br>ITRAQ4plex(K)@8                                                                 |                                                      | -0.0004 | 1235.7518 | 618.8832 | 1235.7522 | 618.8834 | 2 | 48.24 |
|          | 2.24  | 7.2  | RVSVDVGVVER        | Carbamyl@N-term                                                                                       | missed R-V@1                                         | -0.0028 | 1221.6074 | 611.8110 | 1221.6102 | 611.8124 | 2 | 37.92 |

|          |       |      |                                  |                                                                                                    |                                                         |         |           |           |           |           |   |       |
|----------|-------|------|----------------------------------|----------------------------------------------------------------------------------------------------|---------------------------------------------------------|---------|-----------|-----------|-----------|-----------|---|-------|
|          | 2.24  | 7.2  | VSVDVGVER                        | CarbamyI@N-term;<br>ITRAQ4plex(Y)@3                                                                |                                                         | -0.0033 | 1209.6078 | 605.8112  | 1209.6112 | 605.8129  | 2 | 38.02 |
| LIC11587 |       |      |                                  |                                                                                                    |                                                         |         |           |           |           |           |   |       |
|          | 2.01  | 1.1  | EILFEELTTDWSQDAY<br>NTVSGQNSNSIR | Glu->pyro-Glu@N-term;<br>Oxidation(N)@17;<br>Deamidated(N)@26                                      |                                                         | -0.0376 | 3329.4585 | 833.3719  | 3329.4960 | 833.3813  | 4 | 36.40 |
|          | 2.01  | 1.1  | FNLGENFLTK                       | ITRAQ4plex@N-term;<br>Deamidated(N)@6;<br>ITRAQ4plex(K)@10                                         |                                                         | 0.0537  | 1470.8500 | 736.4323  | 1470.7962 | 736.4054  | 2 | 34.01 |
|          | 2.01  | 1.1  | FRRK                             | ITRAQ4plex@N-term;<br>ITRAQ4plex(K)@4                                                              | cleaved Y-F@N-term; missed R-R@2;<br>missed R-K@3       | 0.0257  | 893.6060  | 447.8103  | 893.5803  | 447.7974  | 2 | 58.52 |
|          | 2.01  | 1.1  | GFTNEILEK                        | ITRAQ4plex@N-term;<br>ITRAQ4plex(K)@9                                                              |                                                         | -0.0065 | 1337.7369 | 669.8757  | 1337.7435 | 669.8790  | 2 | 30.82 |
|          | 2.01  | 1.1  | KVQEDGPEWLQK                     | ITRAQ4plex@N-term;<br>ITRAQ4plex(K)@1;<br>ITRAQ4plex(K)@13                                         | missed K-V@1                                            | -0.0331 | 2001.0930 | 668.0383  | 2001.1260 | 668.0493  | 3 | 36.82 |
|          | 2.01  | 1.1  | NLAS                             | No ITRAQ4plex@N-term                                                                               | cleaved C-N@N-term; cleaved S-A@C-term                  | -0.0105 | 403.1963  | 404.2035  | 403.2067  | 404.2140  | 1 | 46.96 |
|          | 2.01  | 1.1  | QTLR                             | ITRAQ4plex@N-term                                                                                  | cleaved S-Q@N-term                                      | 0.0543  | 660.4584  | 661.4656  | 660.4041  | 661.4113  | 1 | 55.38 |
|          | 2.01  | 1.1  | SSGLMSFLK                        | No ITRAQ4plex@N-term;<br>Oxidation(M)@5;<br>ITRAQ4plex(K)@9                                        |                                                         | 0.0487  | 1128.6458 | 565.3301  | 1128.5971 | 565.3058  | 2 | 32.34 |
|          | 2.01  | 1.1  | VDAFTFFK                         | ITRAQ4plex@N-term;<br>ITRAQ4plex(K)@8                                                              | cleaved Y-V@N-term                                      | -0.0442 | 1261.6509 | 421.5576  | 1261.6950 | 421.5723  | 3 | 29.32 |
|          | 2.01  | 1.1  | VSGNKHI                          | ITRAQ4plex@N-term;<br>ITRAQ4plex(K)@5                                                              | cleaved I-V@N-term; cleaved I-K@C-term;<br>missed K-H@5 | -0.0425 | 1041.5750 | 521.7947  | 1041.6175 | 521.8160  | 2 | 24.27 |
| LIC11704 |       |      |                                  |                                                                                                    |                                                         |         |           |           |           |           |   |       |
|          | 2     | 13.0 | EYFEKPSIK                        | ITRAQ4plex@N-term;<br>ITRAQ4plex(K)@5;<br>ITRAQ4plex(K)@9                                          |                                                         | -0.0083 | 1571.8843 | 524.9687  | 1571.8925 | 524.9714  | 3 | 31.22 |
|          | 2     | 13.0 | RFKR                             | ITRAQ4plex@N-term;<br>ITRAQ4plex(K)@3                                                              | missed R-F@1; missed K-R@3                              | 0.0287  | 893.6090  | 447.8118  | 893.5803  | 447.7974  | 2 | 26.50 |
| LIC11746 |       |      |                                  |                                                                                                    |                                                         |         |           |           |           |           |   |       |
|          | 1.84  | 3.0  | AVFGIPEIFR                       | ITRAQ4plex@N-term                                                                                  |                                                         | 0.0067  | 1291.7478 | 646.8812  | 1291.7410 | 646.8778  | 2 | 50.52 |
|          | 1.84  | 3.0  | ELLLLSFR                         | ITRAQ4plex@N-term                                                                                  |                                                         | 0.0157  | 1133.7087 | 567.8616  | 1133.6930 | 567.8538  | 2 | 50.47 |
|          | 1.84  | 3.0  | VQHTNFDISLR                      | ITRAQ4plex@N-term;<br>Phospho(T)@4                                                                 |                                                         | 0.0086  | 1665.8448 | 556.2889  | 1665.8362 | 556.2860  | 3 | 47.33 |
|          | 1.84  | 3.0  | VSFPK                            | ITRAQ4plex@N-term;<br>ITRAQ4plex(K)@5                                                              | cleaved E-V@N-term                                      | -0.0052 | 864.5261  | 433.2703  | 864.5313  | 433.2729  | 2 | 39.70 |
| LIC11832 |       |      |                                  |                                                                                                    |                                                         |         |           |           |           |           |   |       |
|          | 2     | 9.0  | NVGIFHEFLVNK                     | ITRAQ4plex@N-term;<br>ITRAQ4plex(K)@12                                                             |                                                         | 0.0044  | 1703.9646 | 568.9955  | 1703.9603 | 568.9940  | 3 | 34.69 |
|          | 2     | 9.0  | TAVCPKTLPLDFGVIL<br>VSYIPNKR     | ITRAQ4plex@N-term;<br>Methylthio(C)@4;<br>ITRAQ4plex(K)@6;<br>ITRAQ4plex(T)@7;<br>ITRAQ4plex(K)@23 | cleaved F-T@N-term; missed K-T@6;<br>missed K-R@23      | -0.0237 | 3209.7920 | 535.9726  | 3209.8156 | 535.9765  | 6 | 52.41 |
|          | 2     | 9.0  | TNVYEGK                          | ITRAQ4plex@N-term;<br>ITRAQ4plex(K)@7                                                              | cleaved F-T@N-term                                      | -0.0872 | 1097.5089 | 549.7617  | 1097.5961 | 549.8053  | 2 | 38.69 |
| LIC11890 |       |      |                                  |                                                                                                    |                                                         |         |           |           |           |           |   |       |
|          | 12.76 | 33.2 | ADGRPIAISPGEAND<br>VIGLADAALTK   | Formyl@N-term;<br>ITRAQ4plex(S)@9;<br>ITRAQ4plex(S)@10;<br>Deamidated(N)@15;<br>ITRAQ4plex(K)@27   |                                                         | -0.0902 | 3082.5610 | 1028.5280 | 3082.6512 | 1028.5577 | 3 | 39.72 |
|          | 12.76 | 33.2 | ARGSRVAMWFHMG<br>PNQNQR          | Formyl@N-term;<br>Deamidated(R)@2;<br>Oxidation(R)@5;<br>ITRAQ4plex(S)@8                           | cleaved F-A@N-term; missed R-G@2;<br>missed R-V@5       | -0.0598 | 2518.1230 | 840.3817  | 2518.1828 | 840.4015  | 3 | 37.09 |
|          | 12.76 | 33.2 | DMGAYYNR                         | ITRAQ4plex@N-term                                                                                  | cleaved A-D@N-term                                      | 0.0066  | 1132.5160 | 567.2653  | 1132.5093 | 567.2619  | 2 | 28.17 |
|          | 12.76 | 33.2 | DRIASQAEFNK                      | ITRAQ4plex@N-term;<br>Carboxy(D)@1;<br>Deamidated(R)@2;<br>ITRAQ4plex(S)@5;<br>ITRAQ4plex(K)@11    | cleaved V-D@N-term; missed R-I@2                        | 0.0001  | 1754.9165 | 585.9794  | 1754.9164 | 585.9794  | 3 | 31.47 |
|          | 12.76 | 33.2 | EFNK                             | ITRAQ4plex@N-term;<br>ITRAQ4plex(K)@4                                                              | cleaved A-E@N-term                                      | 0.0022  | 824.4659  | 413.2402  | 824.4636  | 413.2391  | 2 | 25.26 |
|          | 12.76 | 33.2 | FNELAVDK                         | ITRAQ4plex@N-term;<br>ITRAQ4plex(K)@8                                                              |                                                         | -0.0134 | 1222.6667 | 612.3406  | 1222.6801 | 612.3473  | 2 | 29.52 |
|          | 12.76 | 33.2 | FNELAVDKTKMALKSS<br>G            | ITRAQ4plex@N-term;<br>ITRAQ4plex(K)@8;<br>ITRAQ4plex(K)@11                                         | cleaved G-M@C-term; missed K-T@8;<br>missed K-A@11      | -0.0232 | 2142.1489 | 715.0569  | 2142.1720 | 715.0646  | 3 | 54.27 |
|          | 12.76 | 33.2 | FYIGTMTSK                        | ITRAQ4plex@N-term;<br>ITRAQ4plex(K)@9                                                              |                                                         | 0.0074  | 1334.7222 | 668.3683  | 1334.7148 | 668.3647  | 2 | 34.70 |
|          | 12.76 | 33.2 | GAYENMQASESR                     | ITRAQ4plex@N-term                                                                                  | cleaved M-G@N-term                                      | 0.0105  | 1485.6746 | 743.8445  | 1485.6640 | 743.8393  | 2 | 24.95 |
|          | 12.76 | 33.2 | IASQAEFNK                        | ITRAQ4plex@N-term;<br>ITRAQ4plex(K)@9                                                              |                                                         | -4.0585 | 1290.6541 | 646.3343  | 1294.7125 | 648.3635  | 2 | 30.93 |

|          |       |      |                                    |                                                                                                |                                                   |         |           |           |           |           |   |       |
|----------|-------|------|------------------------------------|------------------------------------------------------------------------------------------------|---------------------------------------------------|---------|-----------|-----------|-----------|-----------|---|-------|
|          | 12.76 | 33.2 | IRDADMAEEVVSLTTK                   | ITRAQ4plex@N-term;<br>ITRAQ4plex(K)@16                                                         | missed R-D@2                                      | 0.0001  | 2065.0969 | 689.3729  | 2065.0969 | 689.3729  | 3 | 34.48 |
|          | 12.76 | 33.2 | LVKADGRPIAISSPGE<br>ANDVIGLADAALTK | ITRAQ4plex@N-term;<br>ITRAQ4plex(K)@3;<br>Carboxy(E)@16;<br>Carboxy(D)@19;<br>ITRAQ4plex(K)@30 | missed K-A@3                                      | -0.1540 | 3481.7454 | 871.4436  | 3481.8993 | 871.4821  | 4 | 36.71 |
|          | 12.76 | 33.2 | MIINHNL SAVNAHRSL<br>K             | No ITRAQ4plex@N-term;<br>Deamidated(N)@6;<br>ITRAQ4plex(K)@17                                  | missed R-S@14                                     | -0.0024 | 2062.1204 | 688.3807  | 2062.1228 | 688.3815  | 3 | 41.95 |
|          | 12.76 | 33.2 | NIQQR                              | ITRAQ4plex@N-term                                                                              | cleaved S-N@N-term                                | -0.0322 | 786.4511  | 787.4584  | 786.4834  | 787.4906  | 1 | 58.19 |
|          | 12.76 | 33.2 | NTEDEGMSFIQTAEGLF<br>EQTSNIIQR     | ITRAQ4plex@N-term                                                                              |                                                   | -0.0091 | 2972.4216 | 991.8145  | 2972.4307 | 991.8175  | 3 | 43.61 |
|          | 12.76 | 33.2 | QRERFYIGTMSK                       | Gln->pyro-Glu@N-term;<br>Deamidated(R)@4;<br>Oxidation(F)@5;<br>ITRAQ4plex(K)@13               | cleaved N-Q@N-term; missed R-E@2;<br>missed R-F@4 | -0.0212 | 1759.8473 | 880.9309  | 1759.8685 | 880.9415  | 2 | 31.56 |
| LIC11919 |       |      |                                    |                                                                                                |                                                   |         |           |           |           |           |   |       |
|          | 2     | 2.2  | ALEYGMPPTGGLGIGI<br>DR             | ITRAQ4plex@N-term                                                                              |                                                   | -0.0241 | 1959.9969 | 981.0057  | 1960.0210 | 981.0178  | 2 | 33.34 |
|          | 2     | 2.2  | ASELK                              | No ITRAQ4plex@N-term;<br>ITRAQ4plex(K)@5                                                       |                                                   | 0.0106  | 690.4139  | 691.4212  | 690.4034  | 691.4107  | 1 | 57.98 |
|          | 2     | 2.2  | GLEGYLFK                           | ITRAQ4plex@N-term;<br>ITRAQ4plex(K)@8                                                          | cleaved I-G@N-term                                | -0.0685 | 1213.6266 | 607.8206  | 1213.6950 | 607.8548  | 2 | 28.90 |
|          | 2     | 2.2  | LSPLAK                             | ITRAQ4plex@N-term;<br>ITRAQ4plex(K)@6                                                          | cleaved E-L@N-term                                | 0.0783  | 915.6780  | 458.8463  | 915.5997  | 458.8071  | 2 | 51.67 |
|          | 2     | 2.2  | NFRNEGISTK                         | ITRAQ4plex@N-term;<br>Deamidated(R)@3;<br>ITRAQ4plex(K)@10                                     | missed R-N@3                                      | -0.0362 | 1453.7407 | 727.8776  | 1453.7769 | 727.8957  | 2 | 28.60 |
|          | 2     | 2.2  | NPTGPETKFKLGGR                     | ITRAQ4plex@N-term;<br>ITRAQ4plex(K)@8;<br>ITRAQ4plex(K)@10                                     | missed K-F@8; missed K-L@10                       | -0.0432 | 1933.0679 | 645.3632  | 1933.1111 | 645.3776  | 3 | 38.15 |
|          | 2     | 2.2  | SNPKPGYVER                         | ITRAQ4plex@N-term;<br>ITRAQ4plex(K)@5                                                          |                                                   | -0.0098 | 1548.8042 | 517.2753  | 1548.8140 | 517.2786  | 3 | 26.83 |
| LIC11951 |       |      |                                    |                                                                                                |                                                   |         |           |           |           |           |   |       |
|          | 10.88 | 31.0 | GGQIVAPATDLK                       | ITRAQ4plex@N-term;<br>Deamidated(Q)@3;<br>ITRAQ4plex(K)@12                                     | cleaved I-G@N-term                                | 0.0032  | 1457.8365 | 729.9255  | 1457.8333 | 729.9239  | 2 | 32.32 |
|          | 10.88 | 31.0 | IAEVFEELTGSK                       | ITRAQ4plex@N-term;<br>ITRAQ4plex(K)@12                                                         |                                                   | 0.0028  | 1609.8835 | 805.9490  | 1609.8807 | 805.9476  | 2 | 37.21 |
|          | 10.88 | 31.0 | IFLWGPVTDESSK                      | ITRAQ4plex@N-term;<br>ITRAQ4plex(K)@13                                                         |                                                   | -0.0029 | 1765.9465 | 883.9805  | 1765.9494 | 883.9820  | 2 | 34.84 |
|          | 10.18 | 34.5 | IFLWGPVTDESSKDLV<br>GK             | ITRAQ4plex@N-term;<br>ITRAQ4plex(K)@13;<br>ITRAQ4plex(K)@18                                    |                                                   | 0.0350  | 2422.3823 | 808.4681  | 2422.3473 | 808.4564  | 3 | 58.31 |
|          | 10.88 | 31.0 | IFLWGPVTDESSKDLV<br>GKLLYLEMK      | ITRAQ4plex@N-term;<br>ITRAQ4plex(K)@13;<br>ITRAQ4plex(K)@18;<br>ITRAQ4plex(K)@25               | missed K-L@18                                     | -0.1389 | 3456.8042 | 865.2083  | 3456.9430 | 865.2430  | 4 | 57.55 |
|          | 10.88 | 31.0 | IHAEEILK                           | ITRAQ4plex@N-term;<br>ITRAQ4plex(K)@8                                                          |                                                   | 0.0025  | 1239.7456 | 414.2558  | 1239.7431 | 414.2550  | 3 | 31.40 |
|          | 10.88 | 31.0 | IHQP                               | ITRAQ4plex@N-term                                                                              | cleaved M-I@N-term; cleaved P-S@C-term            | 0.0218  | 637.3887  | 638.3960  | 637.3669  | 638.3742  | 1 | 55.89 |
|          | 10.88 | 31.0 | KIFLWGPVTDESSK                     | ITRAQ4plex@N-term;<br>ITRAQ4plex(K)@1;<br>ITRAQ4plex(K)@14                                     | missed K-I@1                                      | 0.0044  | 2038.1510 | 680.3909  | 2038.1464 | 680.3894  | 3 | 35.89 |
|          | 10.88 | 31.0 | LLYLEMK                            | ITRAQ4plex@N-term;<br>ITRAQ4plex(K)@7                                                          |                                                   | 0.0020  | 1196.7102 | 599.3624  | 1196.7083 | 599.3614  | 2 | 50.48 |
|          | 10.88 | 31.0 | LNQILADACGHPIISK                   | ITRAQ4plex@N-term;<br>Methylthio(C)@9;<br>ITRAQ4plex(K)@15                                     |                                                   | 0.0076  | 1913.0183 | 638.6801  | 1913.0107 | 638.6775  | 3 | 35.94 |
|          | 10.88 | 31.0 | SIWPNGK                            | ITRAQ4plex@N-term;<br>Deamidated(N)@5;<br>ITRAQ4plex(K)@7                                      |                                                   | 0.0063  | 1089.6125 | 545.8135  | 1089.6062 | 545.8104  | 2 | 36.69 |
|          | 10.88 | 31.0 | VMIHQPSIGGQIVAPA<br>TDLK           | ITRAQ4plex@N-term;<br>ITRAQ4plex(K)@20                                                         |                                                   | -0.0139 | 2362.3147 | 788.4455  | 2362.3286 | 788.4502  | 3 | 32.47 |
|          | 10.18 | 34.5 | YGIVDK                             | ITRAQ4plex@N-term;<br>ITRAQ4plex(K)@6                                                          |                                                   | -0.0002 | 981.5737  | 491.7941  | 981.5739  | 491.7942  | 2 | 37.76 |
| LIC12017 |       |      |                                    |                                                                                                |                                                   |         |           |           |           |           |   |       |
|          | 8.17  | 6.2  | AGIADPNRPIGTFLFLG<br>PTGVGK        | ITRAQ4plex@N-term;<br>ITRAQ4plex(K)@23                                                         |                                                   | -0.1055 | 2585.3518 | 862.7912  | 2585.4573 | 862.8264  | 3 | 55.22 |
|          | 2     | 1.4  | ANPEVFNIFLQILDEG<br>R              | ITRAQ4plex@N-term                                                                              |                                                   | -0.0581 | 2118.0649 | 1060.0400 | 2118.1231 | 1060.0688 | 2 | 55.46 |
|          | 8.17  | 6.2  | DASN                               | ITRAQ4plex@N-term                                                                              | cleaved L-D@N-term; cleaved N-M@C-term            | -0.0217 | 549.2300  | 550.2372  | 549.2516  | 550.2589  | 1 | 59.68 |
|          | 2     | 1.4  | DEEIRRTIQVLSRR                     | ITRAQ4plex@N-term;<br>Methyl(L)@11                                                             | missed R-R@5; missed R-T@6; missed R-R@13         | 0.1970  | 1928.3008 | 483.0825  | 1928.1037 | 483.0332  | 4 | 59.35 |

|          |      |      |                                  |                                                                                  |                                                                 |         |           |          |           |          |   |       |
|----------|------|------|----------------------------------|----------------------------------------------------------------------------------|-----------------------------------------------------------------|---------|-----------|----------|-----------|----------|---|-------|
|          | 2    | 1.4  | DVSFTNELK                        | ITRAQ4plex@N-term;<br>ITRAQ4plex(K)@9                                            | cleaved L-D@N-term                                              | 0.0461  | 1339.7688 | 447.5969 | 1339.7227 | 447.5815 | 3 | 30.63 |
|          | 8.17 | 6.2  | EIDS                             |                                                                                  | Glu->pyro-Glu@N-term<br>cleaved I-E@N-term; cleaved S-M@C-term  | 0.1552  | 444.3409  | 445.3481 | 444.1856  | 445.1929 | 1 | 1.85  |
|          | 2    | 1.4  | EVLSPQDGLVPLLSK<br>LNLSPK        | ITRAQ4plex@N-term;<br>ITRAQ4plex(K)@16;<br>Deamidated(N)@18;<br>ITRAQ4plex(K)@22 | missed K-L@16                                                   | -0.1773 | 2792.4856 | 699.1287 | 2792.6629 | 699.1730 | 4 | 40.04 |
|          | 2    | 1.4  | FTNGQNVTVDYR                     | ITRAQ4plex@N-term;<br>Deamidated(N)@3                                            |                                                                 | 0.0005  | 1557.7551 | 779.8848 | 1557.7545 | 779.8845 | 2 | 29.20 |
|          | 8.17 | 6.2  | GIPVSK                           | ITRAQ4plex@N-term;<br>ITRAQ4plex(K)@6                                            | cleaved T-G@N-term                                              | -0.0232 | 887.5452  | 444.7799 | 887.5684  | 444.7915 | 2 | 39.92 |
|          | 2    | 1.4  | GKTIMDDSPGK                      | ITRAQ4plex@N-term;<br>ITRAQ4plex(K)@2;<br>ITRAQ4plex(K)@12                       | missed K-T@2                                                    | -0.0709 | 1708.8323 | 570.6180 | 1708.9031 | 570.6416 | 3 | 33.55 |
|          | 2    | 1.4  | GRDEEIRRTIQVLSR                  | ITRAQ4plex@N-term                                                                | cleaved I-G@N-term; missed R-D@2;<br>missed R-R@7; missed R-T@8 | 0.0061  | 1971.1157 | 658.0458 | 1971.1096 | 658.0438 | 3 | 38.40 |
|          | 2    | 1.4  | GSLK                             | No ITRAQ4plex@N-term;<br>ITRAQ4plex(K)@4                                         | cleaved T-G@N-term                                              | -0.0119 | 547.3333  | 548.3405 | 547.3451  | 548.3524 | 1 | 42.24 |
|          | 8.17 | 6.2  | LDPVIGRDEEIR                     | CarbamyI@N-term                                                                  | missed R-D@7                                                    | 0.0530  | 1453.8055 | 727.9100 | 1453.7525 | 727.8835 | 2 | 42.26 |
|          | 2    | 1.4  | LIGAPPGYVGYDEGG<br>QLTEAVRR      | ITRAQ4plex@N-term;<br>Oxidation(P)@5; Oxidation(P)@6;<br>Deamidated(Q)@16        | missed R-R@22                                                   | -0.0228 | 2594.2869 | 865.7696 | 2594.3098 | 865.7772 | 3 | 16.48 |
|          | 8.17 | 6.2  | LLLMEDEVK                        | ITRAQ4plex@N-term;<br>ITRAQ4plex(K)@9                                            |                                                                 | 0.0023  | 1360.8267 | 681.4206 | 1360.8243 | 681.4194 | 2 | 49.46 |
|          | 2    | 1.4  | LNEAIYNAQASAEK                   | ITRAQ4plex@N-term;<br>Deamidated(N)@2;<br>Deamidated(N)@7;<br>ITRAQ4plex(K)@14   |                                                                 | 0.0108  | 1810.9301 | 906.4723 | 1810.9192 | 906.4669 | 2 | 8.52  |
|          | 2    | 1.4  | MLQGERAKLLLMEDV<br>LKTQVIGQDHALR | ITRAQ4plex@N-term;<br>ITRAQ4plex(K)@8;<br>ITRAQ4plex(K)@17;<br>ITRAQ4plex(K)@19  | missed R-A@6; missed K-L@8; missed K-T@17; missed K-V@19        | -0.1646 | 3781.0276 | 946.2642 | 3781.1921 | 946.3053 | 4 | 39.57 |
|          | 2    | 1.4  | TKVIGQDHALR                      | ITRAQ4plex@N-term;<br>ITRAQ4plex(K)@2                                            | missed K-V@2                                                    | 0.0008  | 1524.8987 | 509.3069 | 1524.8980 | 509.3066 | 3 | 33.05 |
|          | 2    | 1.4  | TLTYLDLGSMIAGAK                  | ITRAQ4plex@N-term;<br>ITRAQ4plex(K)@15                                           |                                                                 | -0.0996 | 1840.9216 | 921.4681 | 1841.0212 | 921.5179 | 2 | 35.32 |
|          | 8.17 | 6.2  | VIGQDHALR                        | ITRAQ4plex@N-term                                                                |                                                                 | -0.0159 | 1151.6373 | 576.8259 | 1151.6533 | 576.8339 | 2 | 36.63 |
|          | 2    | 1.4  | WTGIPVSKMLOGERAK                 | No ITRAQ4plex@N-term;<br>Oxidation(P)@5;<br>ITRAQ4plex(K)@8;<br>ITRAQ4plex(K)@16 | missed K-M@8; missed R-A@14                                     | -0.0332 | 2104.1375 | 702.3864 | 2104.1707 | 702.3975 | 3 | 11.46 |
|          | 2    | 1.4  | YAKNLNELAK                       | ITRAQ4plex@N-term;<br>ITRAQ4plex(K)@3;<br>Oxidation(N)@4; Oxidation(N)@6         | missed K-N@3                                                    | -0.0290 | 1626.9017 | 543.3079 | 1626.9306 | 543.3175 | 3 | 29.70 |
|          | 8.17 | 6.2  | YRGEFEDR                         | CarbamyI@N-term                                                                  | missed R-G@2                                                    | 0.0033  | 1113.4873 | 557.7509 | 1113.4839 | 557.7492 | 2 | 37.22 |
| LIC12091 |      |      |                                  |                                                                                  |                                                                 |         |           |          |           |          |   |       |
|          | 2.65 | 5.3  | AIPIGNSLVEK                      | ITRAQ4plex@N-term;<br>ITRAQ4plex(K)@11                                           |                                                                 | -0.0402 | 1427.8190 | 714.9167 | 1427.8591 | 714.9369 | 2 | 50.12 |
|          | 2.65 | 5.3  | FASGTMAIAK                       | ITRAQ4plex@N-term;<br>ITRAQ4plex(T)@5;<br>ITRAQ4plex(K)@10                       |                                                                 | 0.0109  | 1427.8281 | 714.9213 | 1427.8172 | 714.9159 | 2 | 39.46 |
|          | 2.65 | 5.3  | GAHR                             | ITRAQ4plex@N-term                                                                | cleaved F-G@N-term                                              | 0.0252  | 654.3936  | 655.4008 | 654.3683  | 655.3756 | 1 | 55.94 |
|          | 2.65 | 5.3  | GQVNPPEFSLAPVVET<br>FQSLVK       | ITRAQ4plex@N-term;<br>ITRAQ4plex(K)@21                                           |                                                                 | -1.0339 | 2575.3755 | 859.4658 | 2576.4094 | 859.8104 | 3 | 40.28 |
|          | 2.65 | 5.3  | KLPGVEALK                        | ITRAQ4plex@N-term;<br>ITRAQ4plex(K)@1;<br>ITRAQ4plex(K)@9                        | missed K-L@1                                                    | -0.0277 | 1385.8695 | 462.9638 | 1385.8972 | 462.9730 | 3 | 32.67 |
|          | 2.65 | 5.3  | LENDLSGK                         | ITRAQ4plex@N-term;<br>ITRAQ4plex(K)@9                                            |                                                                 | 0.0008  | 1261.7130 | 631.8638 | 1261.7122 | 631.8634 | 2 | 29.41 |
|          | 2.65 | 5.3  | LLPAYAGLLMHK                     | ITRAQ4plex@N-term;<br>ITRAQ4plex(H)@11;<br>ITRAQ4plex(K)@12                      |                                                                 | -0.0309 | 1758.0283 | 880.0214 | 1758.0592 | 880.0369 | 2 | 38.10 |
|          | 2.65 | 5.3  | TLPTIELLIK                       | ITRAQ4plex@N-term;<br>ITRAQ4plex(K)@10                                           |                                                                 | -0.0632 | 1427.8575 | 714.9360 | 1427.9207 | 714.9676 | 2 | 42.89 |
|          | 2.65 | 5.3  | TVVGGDSIAAINK                    | No ITRAQ4plex@N-term;<br>Deamidated(N)@13;<br>ITRAQ4plex(K)@14                   |                                                                 | 0.0552  | 1445.8400 | 723.9272 | 1445.7848 | 723.8997 | 2 | 32.65 |
| LIC12094 |      |      |                                  |                                                                                  |                                                                 |         |           |          |           |          |   |       |
|          | 3.52 | 10.0 | AIGT                             | ITRAQ4plex@N-term                                                                | cleaved W-A@N-term; cleaved T-G@C-term                          | 0.0087  | 504.3117  | 505.3189 | 504.3029  | 505.3102 | 1 | 56.14 |
|          | 3.52 | 10.0 | EKIDIDGGLVGGASQKI<br>SSFAGLF     | Glu->pyro-Glu@N-term;<br>ITRAQ4plex(K)@2;<br>ITRAQ4plex(K)@15                    | missed K-I@15                                                   | -0.0315 | 2565.3367 | 642.3414 | 2565.3682 | 642.3493 | 4 | 40.18 |

|          |      |      |                           |                                                                         |                                                      |         |           |          |           |          |   |       |
|----------|------|------|---------------------------|-------------------------------------------------------------------------|------------------------------------------------------|---------|-----------|----------|-----------|----------|---|-------|
|          | 3.52 | 10.0 | KVATP                     | ITRAQ4plex@N-term;<br>ITRAQ4plex(K)@1                                   | cleaved G-K@N-term; cleaved P-S@C-term; missed K-V@1 | 0.0234  | 802.5391  | 803.5463 | 802.5156  | 803.5229 | 1 | 56.76 |
|          | 3.52 | 10.0 | TLEVLSSQIR                | ITRAQ4plex@N-term                                                       |                                                      | 0.0157  | 1288.7629 | 645.3887 | 1288.7473 | 645.3809 | 2 | 31.13 |
|          | 3.52 | 10.0 | VATPSQAQEVHSFIR           | ITRAQ4plex@N-term                                                       |                                                      | -0.0068 | 1812.9536 | 605.3251 | 1812.9604 | 605.3274 | 3 | 30.69 |
|          | 3.52 | 10.0 | VIVGA                     | No ITRAQ4plex@N-term                                                    | cleaved S-V@N-term; cleaved A-Q@C-term               | -0.0344 | 457.2557  | 458.2630 | 457.2900  | 458.2973 | 1 | 0.29  |
|          | 5.52 | 14.0 | EAVFLAHSIR                | Carbamyl@N-term                                                         |                                                      | 0.0016  | 1184.6318 | 593.3232 | 1184.6302 | 593.3224 | 2 | 44.22 |
|          | 5.52 | 14.0 | FLLK                      | ITRAQ4plex@N-term;<br>ITRAQ4plex(K)@4                                   |                                                      | 0.0148  | 807.5611  | 404.7878 | 807.5462  | 404.7804 | 2 | 41.34 |
| LIC12400 |      |      |                           |                                                                         |                                                      |         |           |          |           |          |   |       |
|          | 2    | 1.5  | ATPQWFFK                  | ITRAQ4plex@N-term;<br>Deamidated(Q)@4;<br>ITRAQ4plex(K)@8               |                                                      | -0.0131 | 1312.6929 | 657.3537 | 1312.7059 | 657.3602 | 2 | 45.81 |
|          | 2.92 | 1.2  | ELSVLK                    | Glu->pyro-Glu@N-term;<br>ITRAQ4plex(K)@6                                | cleaved D-E@N-term                                   | -0.0429 | 813.4653  | 407.7399 | 813.5082  | 407.7614 | 2 | 36.62 |
|          | 2    | 1.5  | ENPYSSTVLLPK              | Glu->pyro-Glu@N-term;<br>Oxidation(F)@3;<br>ITRAQ4plex(K)@12            |                                                      | 0.0418  | 1488.8364 | 497.2861 | 1488.7946 | 497.2721 | 3 | 58.22 |
|          | 2    | 1.5  | FNELREK                   | ITRAQ4plex@N-term;<br>ITRAQ4plex(K)@7                                   | cleaved D-F@N-term; missed R-E@5                     | -0.0246 | 1222.6667 | 612.3406 | 1222.6914 | 612.3530 | 2 | 29.52 |
|          | 2.92 | 1.2  | IIQLLK                    | ITRAQ4plex@N-term;<br>ITRAQ4plex(K)@6                                   | cleaved E-I@N-term                                   | 0.0021  | 1014.7065 | 508.3605 | 1014.7045 | 508.3595 | 2 | 46.03 |
|          | 2.92 | 1.2  | ILPK                      | No ITRAQ4plex@N-term;<br>ITRAQ4plex(K)@4                                |                                                      | 0.0246  | 613.4531  | 614.4604 | 613.4285  | 614.4358 | 1 | 53.24 |
|          | 2    | 1.5  | KVFDANPEIIQLLK            | ITRAQ4plex@N-term;<br>ITRAQ4plex(K)@1;<br>ITRAQ4plex(K)@14              | missed K-V@1                                         | -0.0229 | 2059.2178 | 687.4132 | 2059.2407 | 687.4208 | 3 | 36.52 |
|          | 2    | 1.5  | SGQI                      | No ITRAQ4plex@N-term                                                    | cleaved I-F@C-term                                   | 0.0025  | 403.2092  | 404.2165 | 403.2067  | 404.2140 | 1 | 46.96 |
|          | 2.92 | 1.2  | VLKPVQVECPR               | ITRAQ4plex@N-term;<br>ITRAQ4plex(K)@3;<br>Methylthio(C)@9               |                                                      | -0.0026 | 1600.9011 | 534.6410 | 1600.9037 | 534.6418 | 3 | 44.10 |
|          | 2    | 1.5  | YGADILR                   | ITRAQ4plex@N-term                                                       | cleaved I-Y@N-term                                   | 0.0440  | 950.5747  | 476.2946 | 950.5307  | 476.2726 | 2 | 31.98 |
| LIC12465 |      |      |                           |                                                                         |                                                      |         |           |          |           |          |   |       |
|          | 1.61 | 1.7  | EGPGFPFWHPK               | ITRAQ4plex@N-term;<br>ITRAQ4plex(K)@11                                  |                                                      | 0.0083  | 1585.8369 | 529.6196 | 1585.8285 | 529.6168 | 3 | 53.27 |
|          | 1.61 | 1.7  | IEAEMEK                   | ITRAQ4plex@N-term;<br>ITRAQ4plex(K)@7                                   |                                                      | 0.0454  | 1136.6445 | 569.3295 | 1136.5991 | 569.3068 | 2 | 37.27 |
|          | 1.61 | 1.7  | ILGEK                     | ITRAQ4plex@N-term;<br>ITRAQ4plex(K)@5                                   | cleaved L-I@N-term                                   | 0.0070  | 846.5488  | 424.2817 | 846.5418  | 424.2782 | 2 | 43.00 |
|          | 1.61 | 1.7  | SGVLK                     | No ITRAQ4plex@N-term;<br>ITRAQ4plex(K)@5                                | cleaved N-S@N-term                                   | 0.0162  | 646.4297  | 647.4370 | 646.4136  | 647.4208 | 1 | 59.45 |
|          | 1.61 | 1.7  | TFIATRPEK                 | ITRAQ4plex@N-term;<br>ITRAQ4plex(K)@9                                   |                                                      | -0.0135 | 1349.7776 | 450.9331 | 1349.7911 | 450.9376 | 3 | 40.20 |
|          | 1.71 | 1.7  | AIYGLERFIGILIEHYE<br>GK   | ITRAQ4plex@N-term;<br>Oxidation(F)@9;<br>ITRAQ4plex(K)@20               | missed R-F@8                                         | 0.0373  | 2611.4626 | 871.4948 | 2611.4254 | 871.4824 | 3 | 55.76 |
|          | 1.71 | 1.7  | ELPFLK                    | ITRAQ4plex@N-term;<br>ITRAQ4plex(K)@6                                   |                                                      | 0.0147  | 1033.6564 | 517.8354 | 1033.6416 | 517.8281 | 2 | 39.75 |
|          | 1.71 | 1.7  | FAEFGSVHRHELHGV<br>LHGLFR | ITRAQ4plex@N-term;<br>Oxidation(F)@1;<br>Oxidation(H)@17                | missed R-H@9                                         | 0.1197  | 2620.4731 | 656.1255 | 2620.3533 | 656.0956 | 4 | 49.28 |
|          | 1.71 | 1.7  | GSLE                      | No ITRAQ4plex@N-term                                                    | cleaved Y-G@N-term; cleaved E-R@C-term               | -0.0004 | 404.1903  | 405.1976 | 404.1907  | 405.1980 | 1 | 28.83 |
|          | 1.71 | 1.7  | LNGEILDLSR                | ITRAQ4plex@N-term;<br>Deamidated(N)@2                                   |                                                      | 0.0082  | 1402.7507 | 702.3826 | 1402.7426 | 702.3786 | 2 | 33.19 |
|          | 1.71 | 1.7  | LNGEILDLSRTVEK            | ITRAQ4plex@N-term;<br>Deamidated(N)@2;<br>ITRAQ4plex(K)@15              | missed R-T@11                                        | 0.0036  | 2004.1019 | 669.0413 | 2004.0983 | 669.0400 | 3 | 45.62 |
|          | 1.71 | 1.7  | MYQLTLPDK                 | ITRAQ4plex@N-term;<br>Oxidation(M)@1; Oxidation(Y)@2<br>ITRAQ4plex(K)@9 |                                                      | 0.0769  | 1427.8344 | 714.9244 | 1427.7574 | 714.8860 | 2 | 46.34 |
|          | 1.71 | 1.7  | QDDS                      | Gln->pyro-Glu@N-term                                                    | cleaved T-Q@N-term; cleaved S-H@C-term               | -0.0136 | 446.1149  | 447.1222 | 446.1285  | 447.1358 | 1 | 0.11  |
|          | 1.71 | 1.7  | YALK                      | No ITRAQ4plex@N-term;<br>ITRAQ4plex(K)@4                                | cleaved D-Y@N-term; cleaved K-P@C-term               | -0.0048 | 637.3873  | 638.3946 | 637.3921  | 638.3994 | 1 | 56.42 |
| LIC12526 |      |      |                           |                                                                         |                                                      |         |           |          |           |          |   |       |
|          | 2    | 4.2  | GYVR                      | ITRAQ4plex@N-term                                                       | cleaved V-G@N-term; cleaved R-P@C-term               | 0.0204  | 637.3873  | 638.3946 | 637.3669  | 638.3742 | 1 | 56.42 |
|          | 2    | 4.2  | IEQVGTPEVYNHPK            | ITRAQ4plex@N-term;<br>ITRAQ4plex(K)@15                                  |                                                      | -0.0017 | 2013.0393 | 672.0204 | 2013.0411 | 672.0210 | 3 | 29.80 |
|          | 2    | 4.2  | YPSELGGQRQRIAL<br>R       | ITRAQ4plex@N-term;<br>Deamidated(Q)@9;<br>Oxidation(R)@12               | missed R-Q@10; missed R-I@12                         | 0.0119  | 2062.1160 | 688.3793 | 2062.1041 | 688.3753 | 3 | 1.37  |
| LIC12845 |      |      |                           |                                                                         |                                                      |         |           |          |           |          |   |       |
|          | 2    | 7.6  | DALINNMITSFLK             | ITRAQ4plex@N-term;<br>ITRAQ4plex(K)@13                                  |                                                      | 0.0354  | 1767.0198 | 884.5172 | 1766.9844 | 884.4995 | 2 | 0.10  |

|          |       |      |                                         |                                                                                                         |                                             |         |           |          |           |          |   |       |
|----------|-------|------|-----------------------------------------|---------------------------------------------------------------------------------------------------------|---------------------------------------------|---------|-----------|----------|-----------|----------|---|-------|
|          | 2     | 7.6  | ERSTLLKERIEK                            | ITRAQ4plex@N-term;<br>ITRAQ4plex(K)@7;<br>ITRAQ4plex(K)@12                                              | missed R-S@2; missed R-I@9                  | -0.1068 | 1933.0618 | 645.3612 | 1933.1686 | 645.3968 | 3 | 37.57 |
| LIC12855 |       |      |                                         |                                                                                                         |                                             |         |           |          |           |          |   |       |
|          | 2     | 15.3 | IIVTQVKSSIGVK                           | ITRAQ4plex@N-term;<br>Deamidated(Q)@5;<br>ITRAQ4plex(K)@7;<br>ITRAQ4plex(K)@13                          | cleaved N-I@N-term; missed K-S@7            | 0.1347  | 1804.2745 | 602.4321 | 1804.1399 | 602.3872 | 3 | 53.77 |
|          | 2     | 15.3 | LTLHALGLR                               | ITRAQ4plex@N-term                                                                                       |                                             | 0.0026  | 1136.7178 | 569.3661 | 1136.7152 | 569.3649 | 2 | 51.69 |
| LIC12869 |       |      |                                         |                                                                                                         |                                             |         |           |          |           |          |   |       |
|          | 2     | 19.4 | AHVAGDK                                 | ITRAQ4plex@N-term;<br>Oxidation(H)@2;<br>ITRAQ4plex(K)@7                                                |                                             | 0.0097  | 1000.5642 | 501.2894 | 1000.5545 | 501.2845 | 2 | 31.82 |
|          | 2     | 19.4 | STIFPDMVGHVVMVH<br>NGK                  | ITRAQ4plex@N-term;<br>Deamidated(N)@16;<br>ITRAQ4plex(K)@18                                             |                                             | 0.0009  | 2258.1440 | 565.5433 | 2258.1431 | 565.5431 | 4 | 35.37 |
| LIC13129 |       |      |                                         |                                                                                                         |                                             |         |           |          |           |          |   |       |
|          | 3.22  | 1.8  | DLDKNRILENIK                            | ITRAQ4plex@N-term;<br>ITRAQ4plex(K)@4;<br>Deamidated(N)@10;<br>ITRAQ4plex(K)@12                         | missed K-N@4; missed R-I@6                  | -0.0222 | 1903.0881 | 635.3700 | 1903.1104 | 635.3774 | 3 | 52.62 |
|          | 3.22  | 1.8  | EGITPEQLIER                             | ITRAQ4plex@N-term;<br>Deamidated(Q)@7                                                                   |                                             | 0.0903  | 1428.8485 | 715.4315 | 1428.7582 | 715.3864 | 2 | 0.53  |
|          | 3.22  | 1.8  | EGLALIEILYQTVK                          | ITRAQ4plex@N-term;<br>ITRAQ4plex(K)@15                                                                  |                                             | -1.0060 | 2005.1484 | 669.3901 | 2006.1543 | 669.7254 | 3 | 41.89 |
|          | 3.22  | 1.8  | KEGITPEQLIER                            | ITRAQ4plex@N-term;<br>ITRAQ4plex(K)@1;<br>Deamidated(Q)@8                                               |                                             | -0.1055 | 1700.8497 | 851.4321 | 1700.9552 | 851.4849 | 2 | 24.80 |
|          | 3.22  | 1.8  | KVETSENPVPEER                           | ITRAQ4plex@N-term;<br>ITRAQ4plex(K)@1                                                                   | missed K-V@1                                | -0.0167 | 1800.9294 | 601.3171 | 1800.9461 | 601.3227 | 3 | 26.40 |
|          | 3.22  | 1.8  | LNAS                                    | No ITRAQ4plex@N-term                                                                                    | cleaved T-L@N-term; cleaved S-R@C-term      | -0.0105 | 403.1963  | 404.2035 | 403.2067  | 404.2140 | 1 | 46.96 |
|          | 3.22  | 1.8  | NFPNEPNK                                | ITRAQ4plex@N-term;<br>Oxidation(N)@1; Oxidation(N)@4<br>ITRAQ4plex(K)@8                                 |                                             | 0.0419  | 1278.6868 | 640.3506 | 1278.6448 | 640.3297 | 2 | 29.34 |
|          | 3.22  | 1.8  | NRILENIK                                | ITRAQ4plex@N-term;<br>ITRAQ4plex(K)@8                                                                   | missed R-I@2                                | -0.0456 | 1286.7457 | 429.9225 | 1286.7914 | 429.9377 | 3 | 26.90 |
|          | 3.22  | 1.8  | PEQLIERVQGEHYR                          | ITRAQ4plex@N-term;<br>Oxidation(H)@12                                                                   | cleaved T-P@N-term; missed R-V@7            | 0.0190  | 1913.0066 | 638.6761 | 1912.9877 | 638.6698 | 3 | 36.27 |
|          | 2.01  | 1.8  | RFQK                                    | No ITRAQ4plex@N-term;<br>ITRAQ4plex(K)@4                                                                | cleaved V-R@N-term; missed R-F@1            | 0.0125  | 721.4482  | 722.4554 | 721.4357  | 722.4430 | 1 | 58.32 |
|          | 3.22  | 1.8  | TFVK                                    | No ITRAQ4plex@N-term;<br>ITRAQ4plex(K)@4                                                                | cleaved E-T@N-term                          | -0.0048 | 637.3873  | 638.3946 | 637.3921  | 638.3994 | 1 | 56.42 |
| LIC13324 |       |      |                                         |                                                                                                         |                                             |         |           |          |           |          |   |       |
|          | 8     | 11.4 | AVRAFITETQRVSVGT<br>VRIK                | ITRAQ4plex@N-term;<br>Deamidated(R)@3;<br>ITRAQ4plex(Y)@12;<br>ITRAQ4plex(K)@20                         | missed R-A@3; missed R-Y@11; missed R-I@18  | 0.0086  | 2727.5847 | 682.9034 | 2727.5761 | 682.9013 | 4 | 37.45 |
|          | 8     | 11.4 | EGADAFAHGATGK                           | ITRAQ4plex@N-term;<br>ITRAQ4plex(K)@13                                                                  |                                             | 0.0041  | 1518.7712 | 507.2643 | 1518.7670 | 507.2630 | 3 | 26.71 |
|          | 8     | 11.4 | EGADAFAHGATGKGN<br>DQVRFELGVKSLAPE<br>K | Glu->pyro-Glu@N-term;<br>ITRAQ4plex(K)@13;<br>Oxidation(F)@20;<br>ITRAQ4plex(K)@25;<br>ITRAQ4plex(K)@31 | missed K-G@13; missed R-F@19; missed K-S@25 | -0.1721 | 3628.7244 | 908.1884 | 3628.8963 | 908.2314 | 4 | 50.10 |
|          | 8     | 11.4 | EMAT                                    | ITRAQ4plex@N-term                                                                                       | cleaved P-E@N-term; cleaved T-F@C-term      | 0.0443  | 594.3248  | 595.3320 | 594.2805  | 595.2878 | 1 | 50.79 |
|          | 8     | 11.4 | GIPVPVTAEKPYSD<br>R                     | ITRAQ4plex@N-term;<br>ITRAQ4plex(K)@10                                                                  |                                             | 0.0061  | 2047.1078 | 683.3765 | 2047.1016 | 683.3745 | 3 | 31.93 |
|          | 8     | 11.4 | KMNPLEIMETLNTIAG<br>K                   | ITRAQ4plex@N-term;<br>ITRAQ4plex(K)@1;<br>ITRAQ4plex(K)@17                                              | missed K-M@1                                | -1.0780 | 2333.2236 | 778.7485 | 2334.3016 | 779.1078 | 3 | 42.92 |
|          | 8     | 11.4 | MAQNKPVKK                               | ITRAQ4plex@N-term;<br>ITRAQ4plex(K)@5;<br>ITRAQ4plex(K)@8;<br>ITRAQ4plex(K)@9                           | missed K-K@8                                | -0.0848 | 1618.9191 | 540.6470 | 1619.0040 | 540.6753 | 3 | 49.38 |
|          | 8     | 11.4 | MNPLEIMETLNTIAGK                        | ITRAQ4plex@N-term;<br>ITRAQ4plex(K)@16                                                                  |                                             | 0.0114  | 2062.1160 | 688.3793 | 2062.1046 | 688.3755 | 3 | 1.37  |
|          | 8     | 11.4 | YVSGTVR                                 | ITRAQ4plex@N-term                                                                                       |                                             | -0.0036 | 924.5115  | 463.2630 | 924.5151  | 463.2648 | 2 | 28.97 |
| LIC13393 |       |      |                                         |                                                                                                         |                                             |         |           |          |           |          |   |       |
|          | 13.52 | 21.7 | ADIIQIAPDTIQADLYK                       | ITRAQ4plex@N-term;<br>ITRAQ4plex(K)@18                                                                  |                                             | -0.0054 | 2288.2817 | 763.7679 | 2288.2871 | 763.7697 | 3 | 37.02 |
|          | 13.52 | 21.7 | AGYPNFK                                 | ITRAQ4plex@N-term;<br>ITRAQ4plex(K)@7                                                                   |                                             | 0.0045  | 1083.6002 | 542.8074 | 1083.5957 | 542.8051 | 2 | 29.64 |
|          | 13.52 | 21.7 | ALAAAGVGGGR                             | ITRAQ4plex@N-term                                                                                       |                                             | 0.0022  | 1179.6616 | 590.8381 | 1179.6594 | 590.8370 | 2 | 26.41 |

|          |       |      |                               |                                                                                                                       |                                                         |         |           |           |           |           |   |       |
|----------|-------|------|-------------------------------|-----------------------------------------------------------------------------------------------------------------------|---------------------------------------------------------|---------|-----------|-----------|-----------|-----------|---|-------|
|          | 6.96  | 10.2 | DKNASHPIESVGK                 | Carbamyl@N-term;<br>ITRAQ4plex(K)@2;<br>Deamidated(N)@3;<br>ITRAQ4plex(K)@13                                          | missed K-N@2                                            | -0.0013 | 1712.8925 | 571.9714  | 1712.8937 | 571.9718  | 3 | 36.97 |
|          | 13.52 | 21.7 | DSGLK                         | ITRAQ4plex@N-term;<br>ITRAQ4plex(K)@5                                                                                 |                                                         | 0.1163  | 806.5905  | 404.3025  | 806.4742  | 404.2444  | 2 | 19.05 |
|          | 13.52 | 21.7 | EVDVYMVAPK                    | ITRAQ4plex@N-term;<br>ITRAQ4plex(K)@10                                                                                |                                                         | -0.0028 | 1437.7754 | 719.8950  | 1437.7781 | 719.8963  | 2 | 30.15 |
|          | 13.52 | 21.7 | FATNWAETK                     | ITRAQ4plex@N-term;<br>ITRAQ4plex(K)@10                                                                                |                                                         | -0.8737 | 1484.8793 | 743.4469  | 1485.7530 | 743.8838  | 2 | 31.57 |
|          | 13.52 | 21.7 | FSISDTAEYGDYVSGP<br>R         | ITRAQ4plex@N-term                                                                                                     |                                                         | 0.0147  | 2006.9491 | 1004.4820 | 2006.9343 | 1004.4744 | 2 | 59.24 |
|          | 13.52 | 21.7 | HLVNFSRVISVILSFF              | ITRAQ4plex@N-term                                                                                                     | cleaved F-K@C-term; missed R-V@7                        | -0.0207 | 2120.2061 | 707.7426  | 2120.2268 | 707.7495  | 3 | 38.37 |
|          | 13.52 | 21.7 | LITDLIYEGGL                   | ITRAQ4plex@N-term                                                                                                     | cleaved L-A@C-term                                      | -0.0560 | 1349.7004 | 675.8575  | 1349.7564 | 675.8855  | 2 | 30.28 |
|          | 13.52 | 21.7 | LITDLIYEGGLAR                 | ITRAQ4plex@N-term                                                                                                     |                                                         | 0.0074  | 1576.9021 | 789.4583  | 1576.8946 | 789.4546  | 2 | 36.36 |
|          | 13.52 | 21.7 | MKEVLNDIQK                    | ITRAQ4plex@N-term;<br>ITRAQ4plex(K)@2;<br>Deamidated(N)@6;<br>ITRAQ4plex(K)@10                                        |                                                         | 0.0055  | 1649.9443 | 550.9887  | 1649.9388 | 550.9869  | 3 | 34.69 |
|          | 13.52 | 21.7 | NAGFEVYSVSEASQK               | ITRAQ4plex@N-term;<br>ITRAQ4plex(K)@15                                                                                |                                                         | 0.0530  | 1903.0098 | 635.3439  | 1902.9567 | 635.3262  | 3 | 58.77 |
|          | 13.52 | 21.7 | NASHPIESVGK                   | ITRAQ4plex@N-term;<br>ITRAQ4plex(K)@11                                                                                |                                                         | 0.0033  | 1425.7853 | 476.2690  | 1425.7820 | 476.2679  | 3 | 26.19 |
|          | 6.96  | 10.2 | VIIGLK                        | ITRAQ4plex@N-term;<br>ITRAQ4plex(K)@6                                                                                 |                                                         | -0.0013 | 929.6504  | 465.8325  | 929.6517  | 465.8331  | 2 | 42.10 |
| LIC13399 |       |      |                               |                                                                                                                       |                                                         |         |           |           |           |           |   |       |
|          | 2     | 5.9  | EEIKPLDFVLPQIHDR              | ITRAQ4plex@N-term;<br>ITRAQ4plex(K)@4                                                                                 |                                                         | -0.0100 | 2299.2930 | 767.4383  | 2299.3031 | 767.4416  | 3 | 36.76 |
| LIC13250 |       |      |                               |                                                                                                                       |                                                         |         |           |           |           |           |   |       |
|          | 4     | 4.4  | FEPGLTHNLIR                   | ITRAQ4plex@N-term                                                                                                     |                                                         | -0.0005 | 1439.8002 | 480.9407  | 1439.8007 | 480.9408  | 3 | 45.34 |
|          | 4     | 4.4  | IELR                          | ITRAQ4plex@N-term                                                                                                     | cleaved S-I@N-term                                      | 0.0274  | 673.4519  | 674.4592  | 673.4245  | 674.4317  | 1 | 58.31 |
|          | 4     | 4.4  | IFLFK                         | ITRAQ4plex@N-term;<br>ITRAQ4plex(K)@5                                                                                 | cleaved G-I@N-term                                      | 0.0128  | 954.6275  | 478.3210  | 954.6146  | 478.3146  | 2 | 47.80 |
|          | 4     | 4.4  | LLAN                          | No ITRAQ4plex@N-term                                                                                                  | cleaved F-L@N-term; cleaved N-R@C-term                  | 0.0770  | 429.3357  | 430.3430  | 429.2587  | 430.2660  | 1 | 58.43 |
|          | 4     | 4.4  | STNSGISANIDHLGR               | ITRAQ4plex@N-term                                                                                                     |                                                         | -0.9648 | 1683.8966 | 562.3062  | 1684.8614 | 562.6278  | 3 | 41.12 |
|          | 4     | 4.4  | VREFR                         | ITRAQ4plex@N-term                                                                                                     | cleaved F-V@N-term; missed R-E@2                        | 0.0400  | 849.5342  | 425.7744  | 849.4943  | 425.7544  | 2 | 44.54 |
|          | 4     | 4.4  | YETTRTEVSETGK                 | ITRAQ4plex@N-term;<br>ITRAQ4plex(K)@13                                                                                | cleaved Y-Y@N-term; missed R-T@5                        | 0.0441  | 1787.9586 | 596.9935  | 1787.9145 | 596.9788  | 3 | 42.55 |
| LIC11354 |       |      |                               |                                                                                                                       |                                                         |         |           |           |           |           |   |       |
|          | 9.04  | 14.0 | ANFKLTPRGIIESLK               | ITRAQ4plex@N-term;<br>Deamidated(N)@2;<br>ITRAQ4plex(K)@4;<br>Oxidation(P)@7;<br>Deamidated(R)@8;<br>ITRAQ4plex(K)@15 | missed K-L@4; missed R-G@8                              | -0.0418 | 2136.2102 | 713.0773  | 2136.2520 | 713.0913  | 3 | 37.89 |
|          | 9.04  | 14.0 | EQGAGDQGLMFGFAI<br>NETPELMPMP | ITRAQ4plex@N-term;<br>Deamidated(Q)@7                                                                                 | cleaved P-I@C-term                                      | 0.1679  | 2824.4558 | 942.4926  | 2824.2880 | 942.4366  | 3 | 41.71 |
|          | 9.89  | 15.8 | ETASYGHFGR                    | ITRAQ4plex@N-term                                                                                                     |                                                         | -0.0056 | 1267.6011 | 423.5410  | 1267.6067 | 423.5429  | 3 | 38.32 |
|          | 9.89  | 15.8 | FLRPDAK                       | Carbamyl@N-term;<br>ITRAQ4plex(K)@7                                                                                   |                                                         | 0.0105  | 1032.5944 | 517.3044  | 1032.5838 | 517.2992  | 2 | 41.22 |
|          | 9.04  | 14.0 | GKVDAQEIAR                    | ITRAQ4plex@N-term;<br>ITRAQ4plex(K)@2                                                                                 | missed K-V@2                                            | -0.0073 | 1373.7797 | 458.9338  | 1373.7870 | 458.9363  | 3 | 27.62 |
|          | 9.89  | 15.8 | HLAGLRHGK                     | No ITRAQ4plex@N-term;<br>Deamidated(N)@9;<br>ITRAQ4plex(K)@10                                                         | missed R-H@6                                            | -0.0147 | 1246.6869 | 416.5696  | 1246.7016 | 416.5745  | 3 | 38.35 |
|          | 9.04  | 14.0 | IDTVVISTQHPDVTH<br>K          | ITRAQ4plex@N-term;<br>ITRAQ4plex(K)@17                                                                                |                                                         | -0.0137 | 2164.1594 | 722.3937  | 2164.1732 | 722.3983  | 3 | 31.94 |
|          | 9.89  | 15.8 | IFTSESVGEGHPDK                | No ITRAQ4plex@N-term;<br>Oxidation(F)@2;<br>ITRAQ4plex(K)@14                                                          | cleaved F-I@N-term                                      | 0.0218  | 1661.8236 | 554.9485  | 1661.8019 | 554.9412  | 3 | 57.52 |
|          | 9.04  | 14.0 | IIVDTYGGYGR                   | ITRAQ4plex@N-term;<br>ITRAQ4plex(Y)@9                                                                                 |                                                         | 0.0358  | 1500.8539 | 751.4342  | 1500.8180 | 751.4163  | 2 | 55.87 |
|          | 9.89  | 15.8 | IPAN                          | ITRAQ4plex@N-term                                                                                                     | cleaved V-I@N-term; cleaved N-L@C-term                  | 0.1662  | 557.4957  | 558.5029  | 557.3295  | 558.3368  | 1 | 58.78 |
|          | 9.04  | 14.0 | ISEEELVK                      | ITRAQ4plex@N-term;<br>ITRAQ4plex(K)@8                                                                                 |                                                         | -0.0326 | 1233.6735 | 617.8440  | 1233.7060 | 617.8603  | 2 | 28.85 |
|          | 9.04  | 14.0 | ISEEELVKR                     | ITRAQ4plex@N-term;<br>ITRAQ4plex(K)@8                                                                                 | missed K-R@8                                            | -0.0025 | 1389.8046 | 464.2755  | 1389.8071 | 464.2763  | 3 | 29.60 |
|          | 9.04  | 14.0 | KIIVDTYGGYGR                  | ITRAQ4plex@N-term;<br>ITRAQ4plex(K)@1                                                                                 | missed K-I@1                                            | 0.0232  | 1628.9363 | 543.9860  | 1628.9130 | 543.9783  | 3 | 49.34 |
|          | 9.04  | 14.0 | KPVRI                         | ITRAQ4plex@N-term;<br>ITRAQ4plex(K)@1                                                                                 | cleaved G-K@N-term; cleaved I-D@C-term;<br>missed R-I@4 | 0.0682  | 899.6842  | 450.8494  | 899.6160  | 450.8153  | 2 | 53.62 |
|          | 9.89  | 15.8 | LIEECK                        | ITRAQ4plex@N-term;<br>Methylthio(C)@5;<br>ITRAQ4plex(K)@7                                                             | cleaved A-L@N-term                                      | 0.0298  | 1180.6738 | 591.3442  | 1180.6439 | 591.3292  | 2 | 37.38 |



|          |      |      |                               |                                                                                |                                                         |         |           |          |           |          |   |       |
|----------|------|------|-------------------------------|--------------------------------------------------------------------------------|---------------------------------------------------------|---------|-----------|----------|-----------|----------|---|-------|
|          | 9.04 | 14.0 | LTPRGIHESLK                   | ITRAQ4plex@N-term;<br>ITRAQ4plex(K)@11                                         | missed R-G@4                                            | -0.0044 | 1513.9391 | 757.9768 | 1513.9435 | 757.9791 | 2 | 51.74 |
|          | 9.89 | 15.8 | NVVASGLADK                    | No ITRAQ4plex@N-term;<br>ITRAQ4plex(K)@10                                      |                                                         | -0.0027 | 1116.6234 | 559.3190 | 1116.6261 | 559.3203 | 2 | 37.01 |
|          | 9.04 | 14.0 | SQVTVEYK                      | ITRAQ4plex@N-term;<br>ITRAQ4plex(K)@8                                          |                                                         | 0.0009  | 1240.6915 | 621.3530 | 1240.6907 | 621.3526 | 2 | 26.88 |
|          | 9.04 | 14.0 | VCDQISDAVLDAYLEQ<br>DPK       | ITRAQ4plex@N-term;<br>Methylthio(C)@2;<br>ITRAQ4plex(K)@19                     |                                                         | -0.0052 | 2455.1802 | 819.4007 | 2455.1854 | 819.4024 | 3 | 37.80 |
|          | 9.04 | 14.0 | VDAQEIARNVIR                  | ITRAQ4plex@N-term                                                              | missed R-N@8                                            | 0.0060  | 1526.8711 | 764.4428 | 1526.8651 | 764.4398 | 2 | 43.42 |
|          | 9.04 | 14.0 | VIPANLLNNTK                   | ITRAQ4plex@N-term;<br>Deamidated(N)@8;<br>ITRAQ4plex(K)@11                     |                                                         | -0.0013 | 1484.8793 | 743.4469 | 1484.8806 | 743.4476 | 2 | 31.57 |
|          | 9.89 | 15.8 | YFINPTGQFIIGGPHGD<br>AGLTGR   | ITRAQ4plex@N-term                                                              |                                                         | -0.0064 | 2531.2979 | 844.7733 | 2531.3043 | 844.7754 | 3 | 46.31 |
| LIC13367 |      |      |                               |                                                                                |                                                         |         |           |          |           |          |   |       |
|          | 3.19 | 1.6  | AASLLGWVPENALIPV<br>AEAIVTAHR | ITRAQ4plex@N-term                                                              |                                                         | 1.0331  | 2742.5681 | 915.1967 | 2741.5350 | 914.8523 | 3 | 56.14 |
|          | 3.19 | 1.6  | AEGL                          | ITRAQ4plex@N-term                                                              | cleaved I-A@N-term; cleaved L-D@C-term                  | -0.0076 | 532.2902  | 533.2975 | 532.2979  | 533.3051 | 1 | 49.25 |
|          | 5.53 | 8.0  | AFVLWK                        | ITRAQ4plex@N-term;<br>ITRAQ4plex(K)@6                                          |                                                         | 0.0046  | 1050.6516 | 526.3331 | 1050.6470 | 526.3308 | 2 | 53.19 |
|          | 5.53 | 8.0  | ELQLLDGVSQILSDHF<br>K         | ITRAQ4plex@N-term;<br>ITRAQ4plex(K)@17                                         |                                                         | -0.0069 | 2229.2178 | 744.0799 | 2229.2249 | 744.0822 | 3 | 40.54 |
|          | 5.53 | 8.0  | ELSPVEDIKLNSNLR               | ITRAQ4plex@N-term;<br>Oxidation(D)@7;<br>ITRAQ4plex(K)@9                       | missed K-L@9                                            | -0.0243 | 2144.1438 | 715.7219 | 2144.1681 | 715.7300 | 3 | 57.32 |
|          | 3.19 | 1.6  | FHGLYQQKDR                    | ITRAQ4plex@N-term;<br>Deamidated(O)@7;<br>ITRAQ4plex(K)@8                      |                                                         | 0.0032  | 1579.8381 | 527.6200 | 1579.8351 | 527.6190 | 3 | 39.52 |
|          | 5.53 | 8.0  | GGGAIR                        | ITRAQ4plex@N-term                                                              | cleaved F-G@N-term                                      | 0.0555  | 673.4548  | 674.4621 | 673.3993  | 674.4066 | 1 | 54.20 |
|          | 5.53 | 8.0  | IALADIPAQLEK                  | ITRAQ4plex@N-term;<br>Deamidated(O)@9;<br>ITRAQ4plex(K)@12                     |                                                         | -0.0225 | 1569.8998 | 524.3072 | 1569.9221 | 524.3147 | 3 | 31.89 |
|          | 5.53 | 8.0  | KIALADIPAQLEK                 | ITRAQ4plex@N-term;<br>ITRAQ4plex(K)@11;<br>ITRAQ4plex(K)@13                    | missed K-I@1                                            | 0.0047  | 1841.1398 | 614.7205 | 1841.1352 | 614.7190 | 3 | 34.02 |
|          | 3.19 | 1.6  | LLKF                          | ITRAQ4plex@N-term;<br>ITRAQ4plex(K)@3                                          | cleaved Q-L@N-term; cleaved F-H@C-term;<br>missed K-F@3 | 0.0238  | 807.5700  | 404.7923 | 807.5462  | 404.7804 | 2 | 41.27 |
|          | 3.19 | 1.6  | LNSNLRGK                      | ITRAQ4plex@N-term;<br>Oxidation(N)@4;<br>Deamidated(N)@5;<br>ITRAQ4plex(K)@9   | missed R-G@7                                            | 0.0755  | 1319.8156 | 440.9458 | 1319.7401 | 440.9206 | 3 | 43.85 |
|          | 5.53 | 8.0  | LRGK                          | No ITRAQ4plex@N-term;<br>ITRAQ4plex(K)@4                                       | cleaved N-L@N-term; missed R-G@2                        | 0.0452  | 616.4594  | 617.4667 | 616.4142  | 617.4215 | 1 | 55.94 |
|          | 5.53 | 8.0  | LSVQITADQDLILIGIQK            | ITRAQ4plex@N-term;<br>ITRAQ4plex(K)@18                                         |                                                         | -0.2225 | 2255.1118 | 752.7112 | 2255.3344 | 752.7854 | 3 | 38.20 |
|          | 5.53 | 8.0  | MIRGRIPGGR                    | No ITRAQ4plex@N-term;<br>Deamidated(R)@3;<br>Oxidation(P)@7                    | cleaved F-M@N-term; missed R-G@3;<br>missed R-I@5       | 0.0321  | 1128.6508 | 565.3326 | 1128.6186 | 565.3166 | 2 | 32.85 |
|          | 5.53 | 8.0  | NVTQ                          | ITRAQ4plex@N-term                                                              | cleaved Q-A@C-term                                      | 0.0260  | 604.3563  | 605.3635 | 604.3302  | 605.3375 | 1 | 56.30 |
|          | 5.53 | 8.0  | NVTQAVNPLGK                   | ITRAQ4plex@N-term;<br>ITRAQ4plex(K)@11                                         |                                                         | -0.0023 | 1427.8318 | 714.9232 | 1427.8340 | 714.9243 | 2 | 28.49 |
|          | 5.53 | 8.0  | QDGTLSLGFHTLAGR               | Gln->pyro-Glu@N-term                                                           |                                                         | 0.0331  | 1554.8121 | 778.4133 | 1554.7791 | 778.3968 | 2 | 44.05 |
|          | 5.53 | 8.0  | QSVQLHTLR                     | Gln->pyro-Glu@N-term                                                           |                                                         | -0.0148 | 1063.5627 | 532.7886 | 1063.5774 | 532.7960 | 2 | 32.52 |
|          | 5.53 | 8.0  | TFAR                          | ITRAQ4plex@N-term                                                              | cleaved E-T@N-term                                      | 0.0277  | 637.3947  | 638.4019 | 637.3669  | 638.3742 | 1 | 56.31 |
| LIC13257 |      |      |                               |                                                                                |                                                         |         |           |          |           |          |   |       |
|          | 2.01 | 4.1  | ALELREYSENRNRANI<br>VEK       | ITRAQ4plex@N-term;<br>Oxidation(N)@15;<br>ITRAQ4plex(K)@19                     | missed R-E@5; missed R-N@11; missed R-A@13              | -0.0631 | 2607.3342 | 870.1187 | 2607.3972 | 870.1397 | 3 | 54.83 |
|          | 2.01 | 4.1  | EVPIHAGMMIFQDK                | ITRAQ4plex@N-term;<br>ITRAQ4plex(K)@14                                         |                                                         | 0.0150  | 1903.0090 | 635.3436 | 1902.9939 | 635.3386 | 3 | 33.97 |
|          | 2.01 | 4.1  | GLYGIK                        | ITRAQ4plex@N-term;<br>ITRAQ4plex(K)@6                                          |                                                         | -0.0206 | 937.5635  | 469.7890 | 937.5840  | 469.7993 | 2 | 33.03 |
|          | 2.01 | 4.1  | MVVGIAARKGMKVINI<br>VR        | ITRAQ4plex@N-term;<br>Deamidated(R)@8;<br>ITRAQ4plex(K)@9;<br>ITRAQ4plex(K)@12 | missed R-K@8; missed K-G@9; missed K-V@12               | -0.0655 | 2387.3945 | 796.8054 | 2387.4598 | 796.8272 | 3 | 37.62 |
|          | 2.01 | 4.1  | NIVR                          | No ITRAQ4plex@N-term                                                           | cleaved I-N@N-term                                      | 0.0467  | 500.3538  | 501.3611 | 500.3071  | 501.3144 | 1 | 44.93 |
|          | 2.01 | 4.1  | TIRPLKK                       | ITRAQ4plex@N-term;<br>ITRAQ4plex(K)@6;<br>ITRAQ4plex(K)@7                      | missed K-K@6                                            | 0.1322  | 1287.0087 | 644.5116 | 1286.8764 | 644.4455 | 2 | 54.50 |
| LIC13162 |      |      |                               |                                                                                |                                                         |         |           |          |           |          |   |       |
|          | 6.05 | 13.4 | DAAQ                          | ITRAQ4plex@N-term                                                              | cleaved C-D@N-term; cleaved Q-A@C-term                  | 0.0315  | 547.3039  | 548.3112 | 547.2724  | 548.2797 | 1 | 41.87 |

|          |       |      |                              |                                                                                                        |                                                   |         |           |           |           |           |   |       |
|----------|-------|------|------------------------------|--------------------------------------------------------------------------------------------------------|---------------------------------------------------|---------|-----------|-----------|-----------|-----------|---|-------|
|          | 6.05  | 13.4 | FGAGK                        | No iTRAQ4plex@N-term;<br>iTRAQ4plex(K)@5                                                               |                                                   | 0.0015  | 622.3576  | 623.3649  | 622.3560  | 623.3633  | 1 | 59.66 |
|          | 6.05  | 13.4 | HIFIVGPDSPQTYEQT<br>LTIK     | iTRAQ4plex@N-term;<br>iTRAQ4plex(K)@21                                                                 |                                                   | 0.0061  | 2645.4370 | 882.8196  | 2645.4308 | 882.8176  | 3 | 34.08 |
|          | 6.05  | 13.4 | IPYK                         | iTRAQ4plex@N-term;<br>iTRAQ4plex(K)@4                                                                  | cleaved S-I@N-term                                | 0.0551  | 807.5649  | 404.7897  | 807.5098  | 404.7622  | 2 | 43.69 |
|          | 6.05  | 13.4 | NTPDLNVITHVK                 | iTRAQ4plex@N-term;<br>iTRAQ4plex(K)@12                                                                 |                                                   | -0.0026 | 1637.9319 | 546.9846  | 1637.9344 | 546.9854  | 3 | 31.24 |
|          | 6.05  | 13.4 | RATRIVEVK                    | iTRAQ4plex@N-term;<br>iTRAQ4plex(K)@9                                                                  | cleaved H-R@N-term; missed R-A@1;<br>missed R-I@4 | -0.0736 | 1358.7866 | 453.9362  | 1358.8602 | 453.9607  | 3 | 30.65 |
|          | 6.05  | 13.4 | TETLHVEEFR                   | iTRAQ4plex@N-term                                                                                      | cleaved I-T@N-term                                | -0.0062 | 1403.7104 | 468.9108  | 1403.7167 | 468.9128  | 3 | 38.73 |
|          | 6.05  | 13.4 | TGKPVILK                     | iTRAQ4plex@N-term;<br>iTRAQ4plex(K)@3;<br>iTRAQ4plex(K)@8                                              |                                                   | -0.0509 | 1286.8142 | 429.9453  | 1286.8651 | 429.9623  | 3 | 30.49 |
|          | 6.05  | 13.4 | YEETIRPITDEADSYFV<br>K       | iTRAQ4plex@N-term;<br>iTRAQ4plex(K)@18                                                                 |                                                   | -0.0132 | 2463.2280 | 822.0833  | 2463.2413 | 822.0877  | 3 | 33.76 |
| LIC13060 |       |      |                              |                                                                                                        |                                                   |         |           |           |           |           |   |       |
|          | 1.52  | 2.7  | INGT                         | iTRAQ4plex@N-term                                                                                      | cleaved T-C@C-term                                | -0.0028 | 547.3060  | 548.3133  | 547.3088  | 548.3160  | 1 | 38.83 |
|          | 1.52  | 2.7  | QTVGTETNVK                   | Gln->pyro-Glu@N-term;<br>iTRAQ4plex(K)@10                                                              |                                                   | -0.0053 | 1202.6212 | 602.3179  | 1202.6265 | 602.3205  | 2 | 34.25 |
| LIC12895 |       |      |                              |                                                                                                        |                                                   |         |           |           |           |           |   |       |
|          | 1.78  | 6.3  | AFVLVLSLNSGITR               | iTRAQ4plex@N-term                                                                                      |                                                   | -0.0632 | 1606.8533 | 804.4339  | 1606.9164 | 804.4655  | 2 | 47.06 |
|          | 1.78  | 6.3  | AWCDYDLLFK                   | iTRAQ4plex@N-term;<br>Methylthio(C)@3;<br>iTRAQ4plex(K)@10                                             |                                                   | 0.0200  | 1606.7968 | 804.4056  | 1606.7767 | 804.3956  | 2 | 38.09 |
|          | 1.78  | 6.3  | DLLELK                       | iTRAQ4plex@N-term;<br>iTRAQ4plex(K)@6                                                                  |                                                   | 0.0130  | 1017.6444 | 509.8295  | 1017.6314 | 509.8230  | 2 | 44.34 |
|          | 1.78  | 6.3  | LLFK                         | iTRAQ4plex@N-term;<br>iTRAQ4plex(K)@4                                                                  | cleaved D-L@N-term                                | 0.0065  | 807.5527  | 404.7836  | 807.5462  | 404.7804  | 2 | 39.59 |
|          | 1.78  | 6.3  | RAFVLVLSLNSGITRS<br>LQR      | No iTRAQ4plex@N-term;<br>Deamidated(N)@10;<br>Deamidated(R)@15                                         | missed R-A@1; missed R-S@15                       | 0.0121  | 2105.1714 | 702.7311  | 2105.1593 | 702.7270  | 3 | 49.13 |
|          | 1.78  | 6.3  | YTNILFLFAIGFVFSKA<br>PK      | No iTRAQ4plex@N-term;<br>Oxidation(F)@12;<br>Methylthio(C)@16;<br>iTRAQ4plex(K)@19                     |                                                   | -0.1352 | 2356.0769 | 590.0265  | 2356.2122 | 590.0603  | 4 | 34.86 |
| LIC12694 |       |      |                              |                                                                                                        |                                                   |         |           |           |           |           |   |       |
|          | 24.63 | 10.5 | AGNRIWMLAR                   | iTRAQ4plex@N-term;<br>Oxidation(M)@7                                                                   | cleaved I-A@N-term; missed R-I@4                  | 0.0273  | 1346.7637 | 674.3891  | 1346.7363 | 674.3754  | 2 | 30.29 |
|          | 24.63 | 10.5 | AGVGTIAAGVAK                 | iTRAQ4plex@N-term;<br>iTRAQ4plex(K)@12                                                                 | cleaved E-A@N-term                                | 0.0101  | 1301.8011 | 651.9078  | 1301.7911 | 651.9028  | 2 | 55.78 |
|          | 24.63 | 10.5 | ALEGGSSMALSYLVR<br>NTNRTVGAK | No iTRAQ4plex@N-term;<br>iTRAQ4plex(K)@5;<br>Oxidation(N)@16;<br>Deamidated(N)@18;<br>iTRAQ4plex(K)@24 | missed K-S@5; missed R-N@15; missed R-<br>T@19    | -0.1025 | 2870.4504 | 718.6199  | 2870.5528 | 718.6455  | 4 | 39.70 |
|          | 24.63 | 10.5 | AMNR                         | iTRAQ4plex@N-term                                                                                      | cleaved I-A@N-term                                | 0.0108  | 634.3450  | 635.3523  | 634.3343  | 635.3415  | 1 | 37.78 |
|          | 24.63 | 10.5 | APIPMELAVAAVHNHL<br>IR       | iTRAQ4plex@N-term                                                                                      |                                                   | 0.0086  | 2095.1934 | 524.8056  | 2095.1846 | 524.8034  | 4 | 40.65 |
|          | 11.87 | 4.3  | AVACLTHR                     | iTRAQ4plex@N-term;<br>Methylthio(C)@4                                                                  |                                                   | -0.0027 | 1059.5413 | 530.7779  | 1059.5439 | 530.7792  | 2 | 40.17 |
|          | 24.63 | 10.5 | DLDFVAK                      | iTRAQ4plex@N-term;<br>iTRAQ4plex(K)@8                                                                  |                                                   | -0.0027 | 1241.6873 | 621.8509  | 1241.6900 | 621.8523  | 2 | 35.01 |
|          | 24.63 | 10.5 | DLKEQLQLQK                   | iTRAQ4plex@N-term;<br>iTRAQ4plex(K)@3;<br>iTRAQ4plex(K)@10                                             | cleaved N-D@N-term                                | -0.0737 | 1673.9304 | 558.9841  | 1674.0041 | 559.0087  | 3 | 30.59 |
|          | 24.63 | 10.5 | DNAMEAIVRSGK                 | iTRAQ4plex@N-term;<br>iTRAQ4plex(K)@12                                                                 | cleaved L-D@N-term; missed R-S@9                  | -0.1572 | 1577.6866 | 526.9028  | 1577.8439 | 526.9552  | 3 | 37.35 |
|          | 24.63 | 10.5 | DRLDSLNLNPLVR                | iTRAQ4plex@N-term                                                                                      | missed R-L@2                                      | 0.0111  | 1782.0232 | 595.0150  | 1782.0121 | 595.0113  | 3 | 34.70 |
|          | 24.63 | 10.5 | EAISSMGDDTPLSILM<br>LSR      | iTRAQ4plex@N-term                                                                                      |                                                   | 0.0004  | 2179.0989 | 1090.5570 | 2179.0986 | 1090.5566 | 2 | 39.55 |
|          | 24.63 | 10.5 | EATKILKESDPINIR              | No iTRAQ4plex@N-term;<br>iTRAQ4plex(K)@4;<br>iTRAQ4plex(K)@7                                           | missed K-I@4                                      | -0.1417 | 2014.0250 | 672.3489  | 2014.1666 | 672.3962  | 3 | 47.97 |
|          | 24.63 | 10.5 | EGILK                        | iTRAQ4plex@N-term;<br>iTRAQ4plex(K)@5                                                                  | cleaved S-E@N-term                                | 0.0198  | 846.5617  | 424.2881  | 846.5418  | 424.2782  | 2 | 36.32 |
|          | 24.63 | 10.5 | EINPEDFISEKDDQPH<br>R        | iTRAQ4plex@N-term;<br>iTRAQ4plex(K)@11                                                                 |                                                   | -0.0770 | 2356.0769 | 590.0265  | 2356.1539 | 590.0457  | 4 | 34.86 |
|          | 11.87 | 4.3  | ELVIK                        | iTRAQ4plex@N-term;<br>iTRAQ4plex(K)@5                                                                  | cleaved E-E@N-term                                | -0.0006 | 888.5882  | 445.3014  | 888.5888  | 445.3017  | 2 | 38.84 |
|          | 24.63 | 10.5 | EYLAELGFRSIDEIIGR            | Glu->pyro-Glu@N-term;<br>Oxidation(F)@8;<br>Deamidated(R)@9                                            | missed R-S@9                                      | -0.0374 | 1978.9626 | 660.6615  | 1979.0000 | 660.6739  | 3 | 25.19 |
|          | 24.63 | 10.5 | FAQVTNPPIDYMR                | iTRAQ4plex@N-term                                                                                      |                                                   | 0.0073  | 1694.8646 | 848.4396  | 1694.8572 | 848.4359  | 2 | 32.49 |
|          | 11.87 | 4.3  | FLIQK                        | iTRAQ4plex@N-term;<br>iTRAQ4plex(K)@5                                                                  | cleaved L-F@N-term                                | 0.0039  | 935.6087  | 468.8116  | 935.6048  | 468.8097  | 2 | 40.53 |

|          |       |      |                             |                                                                                                      |                                                         |         |           |          |           |          |   |       |
|----------|-------|------|-----------------------------|------------------------------------------------------------------------------------------------------|---------------------------------------------------------|---------|-----------|----------|-----------|----------|---|-------|
|          | 24.63 | 10.5 | GDLANSSIKQIASGR             | ITRAQ4plex@N-term;<br>ITRAQ4plex(K)@9                                                                | missed K-Q@9                                            | 0.0305  | 1804.0353 | 602.3524 | 1804.0046 | 602.3422 | 3 | 33.22 |
|          | 24.63 | 10.5 | GEGGQLPGK                   | No ITRAQ4plex@N-term;<br>ITRAQ4plex(K)@9                                                             | cleaved P-G@N-term                                      | 0.0118  | 985.5432  | 493.7789 | 985.5314  | 493.7730 | 2 | 35.64 |
|          | 24.63 | 10.5 | GLLKIMSK                    | ITRAQ4plex@N-term;<br>ITRAQ4plex(K)@4;<br>ITRAQ4plex(K)@8                                            | cleaved D-G@N-term; missed K-I@4                        | 0.0555  | 1320.9083 | 441.3101 | 1320.8528 | 441.2916 | 3 | 58.02 |
|          | 11.87 | 4.3  | GVIVIK                      | ITRAQ4plex@N-term;<br>ITRAQ4plex(K)@6                                                                | cleaved G-G@N-term                                      | 0.0221  | 915.6582  | 458.8364 | 915.6361  | 458.8253 | 2 | 57.79 |
|          | 24.63 | 10.5 | GWDIQPLLNK                  | ITRAQ4plex@N-term;<br>ITRAQ4plex(K)@10                                                               |                                                         | 0.0061  | 1470.8500 | 736.4323 | 1470.8438 | 736.4292 | 2 | 34.01 |
|          | 24.63 | 10.5 | IAQGAKPGEGGQLPGK            | ITRAQ4plex@N-term;<br>ITRAQ4plex(K)@6;<br>ITRAQ4plex(K)@16                                           |                                                         | -0.0051 | 1939.1166 | 647.3795 | 1939.1216 | 647.3812 | 3 | 28.25 |
|          | 24.63 | 10.5 | ICGNRYRVDDGLLK              | ITRAQ4plex@N-term;<br>Methylthio(C)@2;<br>Oxidation(R)@6;<br>Oxidation(D)@11;<br>ITRAQ4plex(K)@15    | missed R-Y@6                                            | 0.0182  | 2051.0242 | 684.6820 | 2051.0060 | 684.6759 | 3 | 60.49 |
|          | 11.87 | 4.3  | IGINLK                      | ITRAQ4plex@N-term;<br>ITRAQ4plex(K)@6                                                                | cleaved M-I@N-term                                      | -0.0033 | 944.6229  | 473.3187 | 944.6262  | 473.3204 | 2 | 42.17 |
|          | 24.63 | 10.5 | IGNT                        | ITRAQ4plex@N-term                                                                                    | cleaved I-I@N-term; cleaved T-C@C-term                  | -0.0028 | 547.3060  | 548.3133 | 547.3088  | 548.3160 | 1 | 38.83 |
|          | 11.87 | 4.3  | ILAHNGEINTIAGNR             | CarbamyI@N-term;<br>Deamidated(N)@5                                                                  |                                                         | 0.0078  | 1635.8407 | 818.9276 | 1635.8329 | 818.9237 | 2 | 43.42 |
|          | 11.87 | 4.3  | ILTLDATF                    | No ITRAQ4plex@N-term                                                                                 | cleaved F-E@C-term                                      | -0.0396 | 892.4510  | 447.2328 | 892.4906  | 447.2526 | 2 | 41.35 |
|          | 11.87 | 4.3  | ILTLDATFEAHLETEASQSRNYLETAL | ITRAQ4plex@N-term;<br>ITRAQ4plex(S)@17;<br>Oxidation(R)@20;<br>Deamidated(N)@21;<br>ITRAQ4plex(Y)@22 | cleaved L-D@C-term; missed R-N@20                       | -0.0167 | 3484.7773 | 872.2016 | 3484.7939 | 872.2057 | 4 | 49.35 |
|          | 11.87 | 4.3  | IQIP                        | ITRAQ4plex@N-term                                                                                    | cleaved M-I@N-term; cleaved P-K@C-term                  | -0.0002 | 613.3919  | 614.3992 | 613.3921  | 614.3994 | 1 | 50.66 |
|          | 24.63 | 10.5 | ISGIGGIEQNILR               | ITRAQ4plex@N-term                                                                                    |                                                         | -0.0041 | 1682.9761 | 842.4953 | 1682.9801 | 842.4973 | 2 | 34.83 |
|          | 11.87 | 4.3  | ISGLIAR                     | ITRAQ4plex@N-term                                                                                    |                                                         | 0.0041  | 872.5607  | 437.2876 | 872.5565  | 437.2855 | 2 | 40.49 |
|          | 11.87 | 4.3  | IVSMGLK                     | ITRAQ4plex@N-term;<br>Oxidation(M)@4;<br>ITRAQ4plex(K)@7                                             |                                                         | -0.0026 | 1050.6326 | 526.3235 | 1050.6351 | 526.3248 | 2 | 37.84 |
|          | 11.87 | 4.3  | IWMLAR                      | ITRAQ4plex@N-term                                                                                    |                                                         | 0.0083  | 932.5471  | 467.2808 | 932.5388  | 467.2767 | 2 | 45.68 |
|          | 24.63 | 10.5 | KEPVGELDDR                  | ITRAQ4plex@N-term;<br>ITRAQ4plex(K)@1                                                                |                                                         | 0.0112  | 1543.8561 | 515.6260 | 1543.8450 | 515.6223 | 3 | 30.84 |
|          | 11.87 | 4.3  | LFLIQK                      | ITRAQ4plex@N-term;<br>ITRAQ4plex(K)@6                                                                |                                                         | 0.0114  | 1048.7002 | 525.3574 | 1048.6888 | 525.3517 | 2 | 45.61 |
|          | 24.63 | 10.5 | LGSVGK                      | ITRAQ4plex@N-term;<br>ITRAQ4plex(K)@6                                                                | cleaved C-L@N-term                                      | -0.0318 | 847.5053  | 424.7599 | 847.5371  | 424.7758 | 2 | 23.57 |
|          | 11.87 | 4.3  | LKAAT                       | No ITRAQ4plex@N-term;<br>ITRAQ4plex(K)@2                                                             | cleaved A-L@N-term; cleaved T-S@C-term;<br>missed K-A@2 | 0.0162  | 646.4297  | 647.4370 | 646.4136  | 647.4208 | 1 | 59.45 |
|          | 24.63 | 10.5 | LKEQLQLQK                   | ITRAQ4plex@N-term;<br>ITRAQ4plex(K)@2;<br>Deamidated(Q)@8;<br>ITRAQ4plex(K)@9                        | cleaved D-L@N-term                                      | -0.0297 | 1559.9315 | 520.9844 | 1559.9612 | 520.9943 | 3 | 33.65 |
|          | 24.63 | 10.5 | LNQDLSSINETYKGDLLRR         | ITRAQ4plex@N-term;<br>Deamidated(N)@2;<br>Deamidated(N)@10;<br>ITRAQ4plex(K)@16                      | cleaved Y-L@N-term; missed K-G@16;<br>missed R-R@21     | 0.0002  | 2855.4395 | 952.8204 | 2855.4392 | 952.8204 | 3 | 38.80 |
|          | 24.63 | 10.5 | LPLFYDPTK                   | ITRAQ4plex@N-term;<br>ITRAQ4plex(K)@9                                                                |                                                         | 0.0111  | 1380.8008 | 691.4077 | 1380.7897 | 691.4021 | 2 | 33.48 |
|          | 24.63 | 10.5 | LSKERAPIPMEL                | ITRAQ4plex@N-term;<br>ITRAQ4plex(K)@3;<br>Oxidation(M)@10                                            | cleaved L-A@C-term; missed R-A@5                        | 0.0242  | 1686.9824 | 844.4985 | 1686.9582 | 844.4864 | 2 | 41.26 |
|          | 24.63 | 10.5 | NYLETALDALLDQALK            | ITRAQ4plex@N-term;<br>ITRAQ4plex(K)@16                                                               |                                                         | 0.0234  | 2078.1736 | 693.7318 | 2078.1503 | 693.7240 | 3 | 42.90 |
|          | 24.63 | 10.5 | PGEGGQLPGK                  | ITRAQ4plex@N-term;<br>ITRAQ4plex(K)@10                                                               | cleaved K-P@N-term                                      | 0.0023  | 1226.6886 | 614.3516 | 1226.6863 | 614.3504 | 2 | 26.72 |
|          | 24.63 | 10.5 | SRISGIGGIEQNILR             | ITRAQ4plex@N-term;<br>Deamidated(N)@14                                                               | cleaved Y-S@N-term; missed R-I@2                        | 0.0134  | 1927.1107 | 643.3775 | 1927.0973 | 643.3730 | 3 | 40.35 |
|          | 24.63 | 10.5 | SSIK                        | No ITRAQ4plex@N-term;<br>ITRAQ4plex(K)@4                                                             | cleaved N-S@N-term                                      | 0.0017  | 577.3574  | 578.3647 | 577.3557  | 578.3630 | 1 | 56.92 |
|          | 11.87 | 4.3  | TVDLENVDYEI                 | ITRAQ4plex@N-term;<br>Amino(Y)@9                                                                     | cleaved I-I@C-term                                      | -0.0556 | 1467.6659 | 734.8402 | 1467.7215 | 734.8680 | 2 | 36.06 |
|          | 24.63 | 10.5 | YDLK                        | No ITRAQ4plex@N-term;<br>ITRAQ4plex(K)@4                                                             | cleaved I-Y@N-term                                      | 0.0320  | 681.4139  | 682.4212 | 681.3819  | 682.3892 | 1 | 55.75 |
| LIC12539 |       |      |                             |                                                                                                      |                                                         |         |           |          |           |          |   |       |
|          | 2     | 5.6  | IPNN                        | No ITRAQ4plex@N-term                                                                                 | cleaved S-I@N-term; cleaved N-L@C-term                  | 0.0344  | 456.2677  | 457.2749 | 456.2332  | 457.2405 | 1 | 56.17 |
|          | 2     | 5.6  | QDGE                        | Gln->pyro-Glu@N-term                                                                                 | cleaved S-Q@N-term; cleaved E-E@C-term                  | -0.0397 | 430.0939  | 431.1011 | 430.1336  | 431.1409 | 1 | 19.64 |

|          |      |      |                              |                                                                                                    |                                                                    |         |           |          |           |          |   |       |
|----------|------|------|------------------------------|----------------------------------------------------------------------------------------------------|--------------------------------------------------------------------|---------|-----------|----------|-----------|----------|---|-------|
|          | 2    | 5.6  | SSSSIPNNLEETQK               | ITRAQ4plex@N-term;<br>ITRAQ4plex(K)@14                                                             |                                                                    | -0.0021 | 1820.9338 | 911.4742 | 1820.9360 | 911.4753 | 2 | 27.93 |
| LIC12202 |      |      |                              |                                                                                                    |                                                                    |         |           |          |           |          |   |       |
|          | 4    | 10.0 | DFTYVQDVAEAVFAA<br>AQSDK     | ITRAQ4plex@N-term;<br>ITRAQ4plex(K)@20                                                             |                                                                    | -0.0044 | 2462.2166 | 821.7461 | 2462.2209 | 821.7476 | 3 | 40.53 |
|          | 4    | 10.0 | PFTVVGDKQTR                  | ITRAQ4plex@N-term;<br>Oxidation(P)@1;<br>ITRAQ4plex(K)@9                                           | cleaved K-P@N-term; missed K-Q@9                                   | 0.0279  | 1607.9154 | 536.9791 | 1607.8875 | 536.9698 | 3 | 39.41 |
| LIC12198 |      |      |                              |                                                                                                    |                                                                    |         |           |          |           |          |   |       |
|          | 8.02 | 18.6 | AGTWGNTGAF                   | ITRAQ4plex@N-term                                                                                  | cleaved F-S@C-term                                                 | 0.0247  | 1124.5620 | 563.2883 | 1124.5373 | 563.2759 | 2 | 40.89 |
|          | 8.02 | 18.6 | AIVPVHFTGYMTDMR              | ITRAQ4plex@N-term;<br>Oxidation(P)@4; Oxidation(H)@6                                               |                                                                    | 0.0641  | 1912.9938 | 638.6719 | 1912.9297 | 638.6505 | 3 | 35.98 |
|          | 8.02 | 18.6 | ALTAYGYKEGDFPVT<br>DAHTK     | ITRAQ4plex@N-term;<br>ITRAQ4plex(K)@8;<br>Oxidation(P)@13;<br>Oxidation(D)@16;<br>ITRAQ4plex(K)@20 |                                                                    | 0.0210  | 2647.3706 | 883.4641 | 2647.3495 | 883.4571 | 3 | 39.30 |
|          | 8.02 | 18.6 | EGDFPVTDAHTK                 | ITRAQ4plex@N-term;<br>ITRAQ4plex(K)@12                                                             |                                                                    | -0.0111 | 1603.7975 | 535.6064 | 1603.8086 | 535.6101 | 3 | 28.03 |
|          | 8.02 | 18.6 | FVPTGDFTLGKPLIEF<br>ENQFSK   | ITRAQ4plex@N-term;<br>ITRAQ4plex(K)@11;<br>ITRAQ4plex(K)@22                                        |                                                                    | -1.1473 | 2944.4431 | 737.1180 | 2945.5904 | 737.4049 | 4 | 39.05 |
|          | 8.02 | 18.6 | LDTIQAVVGNWLIPNA<br>VAISNK   | ITRAQ4plex@N-term;<br>ITRAQ4plex(K)@22                                                             |                                                                    | -0.0548 | 2623.4395 | 875.4871 | 2623.4941 | 875.5053 | 3 | 1.96  |
|          | 8.02 | 18.6 | LIGAKYAIGVNSGTDAL<br>K       | No ITRAQ4plex@N-term;<br>ITRAQ4plex(K)@5;<br>ITRAQ4plex(K)@18                                      | missed K-Y@5                                                       | -0.0243 | 2078.1736 | 693.7318 | 2078.1979 | 693.7399 | 3 | 42.90 |
|          | 8.02 | 18.6 | SISQITLPPRPK                 | ITRAQ4plex@N-term;<br>ITRAQ4plex(K)@12                                                             |                                                                    | -0.0048 | 1623.9867 | 542.3362 | 1623.9916 | 542.3378 | 3 | 30.73 |
|          | 4.06 | 7.4  | VHYPIPIYR                    | ITRAQ4plex@N-term                                                                                  |                                                                    | -0.0048 | 1300.7366 | 651.3755 | 1300.7414 | 651.3780 | 2 | 46.05 |
| LIC12197 |      |      |                              |                                                                                                    |                                                                    |         |           |          |           |          |   |       |
|          | 3.22 | 3.0  | AIMPVHLTGR                   | ITRAQ4plex@N-term                                                                                  |                                                                    | -0.9885 | 1236.7202 | 413.2473 | 1237.7087 | 413.5768 | 3 | 30.92 |
|          | 3.22 | 3.0  | DRNTVGEFGFVTR                | ITRAQ4plex@N-term;<br>Oxidation(F)@10                                                              | cleaved I-D@N-term; missed R-N@2                                   | 0.0818  | 1656.9160 | 553.3126 | 1656.8342 | 553.2853 | 3 | 46.51 |
|          | 8    | 14.4 | IADKYSIPVIEDAAQSI<br>GSK     | ITRAQ4plex@N-term;<br>ITRAQ4plex(K)@4;<br>ITRAQ4plex(K)@20                                         | missed K-Y@4                                                       | -1.0457 | 2535.3657 | 846.1292 | 2536.4114 | 846.4777 | 3 | 49.71 |
|          | 3.22 | 3.0  | IGGQEVAKF                    | ITRAQ4plex@N-term;<br>Deamidated(Q)@4;<br>ITRAQ4plex(K)@8                                          | cleaved Y-I@N-term; cleaved F-E@C-term;<br>missed K-F@8            | 0.0397  | 1236.7355 | 619.3750 | 1236.6958 | 619.3552 | 2 | 35.57 |
|          | 3.22 | 3.0  | ILTLPIHQYLK                  | ITRAQ4plex@N-term;<br>ITRAQ4plex(K)@11                                                             |                                                                    | -0.0036 | 1626.0077 | 543.0098 | 1626.0112 | 543.0110 | 3 | 34.91 |
|          | 3.22 | 3.0  | IYNSVSRVR                    | ITRAQ4plex@N-term;<br>Oxidation(Y)@2;<br>Deamidated(N)@3                                           | missed R-V@7                                                       | -0.0199 | 1253.6650 | 627.8398 | 1253.6850 | 627.8498 | 2 | 30.31 |
|          | 3.22 | 3.0  | LNSGT                        | ITRAQ4plex@N-term                                                                                  | cleaved A-L@N-term; cleaved T-D@C-term                             | 0.0364  | 634.3772  | 635.3845 | 634.3408  | 635.3481 | 1 | 54.37 |
|          | 3.22 | 3.0  | MDAIQAAILNFR                 | ITRAQ4plex@N-term;<br>Deamidated(N)@10                                                             |                                                                    | -0.0117 | 1506.7869 | 754.4007 | 1506.7986 | 754.4066 | 2 | 35.20 |
|          | 3.22 | 3.0  | NIPYINLVEQWK                 | ITRAQ4plex@N-term;<br>ITRAQ4plex(K)@12                                                             | cleaved I-N@N-term                                                 | -0.0260 | 1803.9867 | 602.3362 | 1804.0127 | 602.3448 | 3 | 34.19 |
|          | 3.22 | 3.0  | SIGS                         | ITRAQ4plex@N-term                                                                                  | cleaved Q-S@N-term; cleaved S-K@C-term                             | 0.0077  | 506.2899  | 507.2972 | 506.2822  | 507.2895 | 1 | 54.73 |
| LIC12194 |      |      |                              |                                                                                                    |                                                                    |         |           |          |           |          |   |       |
|          | 2    | 4.8  | ALPNMTIAP                    | ITRAQ4plex@N-term;<br>Oxidation(P)@3                                                               | cleaved P-C@C-term                                                 | 0.0079  | 1199.6785 | 600.8465 | 1199.6706 | 600.8426 | 2 | 32.15 |
|          | 2    | 4.8  | AVEDAILR                     | ITRAQ4plex@N-term                                                                                  | cleaved L-A@N-term                                                 | 0.0012  | 1142.6793 | 572.3469 | 1142.6781 | 572.3463 | 2 | 29.97 |
|          | 2    | 4.8  | IGGLGSAI                     | ITRAQ4plex@N-term                                                                                  | cleaved I-L@C-term                                                 | 0.0262  | 830.5246  | 416.2696 | 830.4984  | 416.2565 | 2 | 35.10 |
|          | 2    | 4.8  | LMPLTLDWPHPIYIR              | ITRAQ4plex@N-term                                                                                  |                                                                    | -0.0061 | 2008.1030 | 670.3749 | 2008.1090 | 670.3769 | 3 | 37.46 |
|          | 2    | 4.8  | VYIGS                        | ITRAQ4plex@N-term                                                                                  | cleaved V-V@N-term; cleaved S-D@C-term                             | 0.0320  | 681.4139  | 682.4212 | 681.3819  | 682.3892 | 1 | 55.75 |
| LIC12106 |      |      |                              |                                                                                                    |                                                                    |         |           |          |           |          |   |       |
|          | 2.07 | 1.7  | DPDVTNLTNRMAQEK<br>LSRMDSEIL | ITRAQ4plex@N-term;<br>ITRAQ4plex(K)@15                                                             | cleaved L-P@C-term; missed R-M@10;<br>missed K-L@15; missed R-M@18 | 0.0236  | 3063.5808 | 766.9025 | 3063.5573 | 766.8966 | 4 | 39.84 |
|          | 2.07 | 1.7  | FLKKYNPK                     | ITRAQ4plex@N-term;<br>ITRAQ4plex(K)@3;<br>ITRAQ4plex(K)@4;<br>ITRAQ4plex(K)@8                      | cleaved I-F@N-term; missed K-K@3;<br>missed K-Y@4                  | 0.1898  | 1613.2051 | 404.3085 | 1613.0152 | 404.2611 | 4 | 53.47 |
|          | 2.07 | 1.7  | IFLK                         | ITRAQ4plex@N-term;<br>ITRAQ4plex(K)@4                                                              | cleaved Y-I@N-term                                                 | 0.0155  | 807.5617  | 404.7881 | 807.5462  | 404.7804 | 2 | 43.48 |
|          | 2.07 | 1.7  | IVIDHVLDTGEMAK               | ITRAQ4plex@N-term;<br>ITRAQ4plex(K)@14                                                             |                                                                    | -0.0164 | 1840.0208 | 614.3475 | 1840.0372 | 614.3530 | 3 | 36.00 |
|          | 2.07 | 1.7  | NISGK                        | No ITRAQ4plex@N-term;<br>ITRAQ4plex(K)@5                                                           |                                                                    | 0.0105  | 661.3986  | 662.4059 | 661.3881  | 662.3954 | 1 | 55.90 |
|          | 2.07 | 1.7  | SFKPSAEGR                    | ITRAQ4plex@N-term;<br>ITRAQ4plex(K)@3                                                              |                                                                    | -0.0408 | 1265.6565 | 422.8928 | 1265.6972 | 422.9063 | 3 | 27.87 |



|          |      |      |                                |                                                                                                       |                                        |         |           |          |           |          |   |       |
|----------|------|------|--------------------------------|-------------------------------------------------------------------------------------------------------|----------------------------------------|---------|-----------|----------|-----------|----------|---|-------|
|          | 4    | 5.4  | EDSLLGFRVAVGVPGN<br>VAGLVQIQR  | Glu->pyro-Glu@N-term;<br>ITRAQ4plex(S)@3;<br>Deamidated(Q)@23                                         | missed R-A@8                           | 0.0396  | 2621.4807 | 874.8342 | 2621.4411 | 874.8210 | 3 | 53.69 |
|          | 4    | 5.4  | GKIPELNSILVQK                  | ITRAQ4plex@N-term;<br>ITRAQ4plex(K)@2;<br>ITRAQ4plex(K)@13                                            | missed K-I@2                           | -0.0375 | 1870.1243 | 624.3820 | 1870.1617 | 624.3945 | 3 | 33.65 |
|          | 4    | 5.4  | GLIGA                          | No ITRAQ4plex@N-term                                                                                  | cleaved Y-G@N-term; cleaved A-E@C-term | -0.0389 | 429.2198  | 430.2271 | 429.2587  | 430.2660 | 1 | 22.77 |
|          | 4    | 5.4  | IPLPK                          | ITRAQ4plex@N-term;<br>ITRAQ4plex(K)@5                                                                 | cleaved N-I@N-term                     | 0.0094  | 904.6084  | 453.3115 | 904.5990  | 453.3068 | 2 | 39.40 |
|          | 4    | 5.4  | IPELNSILVQK                    | ITRAQ4plex@N-term;<br>Oxidation(N)@5;<br>Deamidated(Q)@10;<br>ITRAQ4plex(K)@11                        |                                        | 0.0225  | 1557.9447 | 779.9796 | 1557.9221 | 779.9683 | 2 | 38.72 |
|          | 4    | 5.4  | ISNFPNK                        | ITRAQ4plex@N-term;<br>ITRAQ4plex(K)@7                                                                 |                                        | -1.0258 | 1105.6071 | 553.8108 | 1106.6328 | 554.3237 | 2 | 29.12 |
|          | 4    | 5.4  | LAENGFVYPDLQSAI<br>QK          | ITRAQ4plex@N-term;<br>Deamidated(N)@4;<br>ITRAQ4plex(K)@18                                            |                                        | -0.0022 | 2278.2065 | 760.4095 | 2278.2089 | 760.4102 | 3 | 34.45 |
|          | 4    | 5.4  | SVNE                           | No ITRAQ4plex@N-term                                                                                  | cleaved E-R@C-term                     | 0.0348  | 447.2314  | 448.2386 | 447.1965  | 448.2038 | 1 | 3.31  |
| LIC11712 |      |      |                                |                                                                                                       |                                        |         |           |          |           |          |   |       |
|          | 4    | 9.3  | EISPILNLETDELSSLI<br>SEFFPK    | ITRAQ4plex@N-term;<br>ITRAQ4plex(K)@23                                                                |                                        | 0.0062  | 2890.5369 | 964.5196 | 2890.5307 | 964.5175 | 3 | 40.55 |
|          | 4    | 9.3  | ITVDDILDIVHEEASEDI<br>LR       | ITRAQ4plex@N-term                                                                                     |                                        | 0.0022  | 2438.2686 | 813.7634 | 2438.2662 | 813.7627 | 3 | 1.68  |
|          | 4    | 9.3  | LGGVSEEEK                      | No ITRAQ4plex@N-term;<br>ITRAQ4plex(K)@9                                                              |                                        | -0.0053 | 1090.5575 | 546.2860 | 1090.5628 | 546.2887 | 2 | 30.68 |
|          | 4    | 9.3  | QLTFREDSAGRLMNT<br>VFASAVETDVR | No ITRAQ4plex@N-term;<br>Deamidated(R)@5                                                              | missed R-E@5; missed R-L@11            | -0.0568 | 3014.4199 | 754.6122 | 3014.4767 | 754.6265 | 4 | 60.52 |
|          | 4    | 9.3  | VAGMGGNAGTQSITLI<br>VR         | ITRAQ4plex@N-term                                                                                     | cleaved I-V@N-term                     | -0.0010 | 1888.0313 | 630.3510 | 1888.0322 | 630.3513 | 3 | 31.57 |
| LIC11674 |      |      |                                |                                                                                                       |                                        |         |           |          |           |          |   |       |
|          | 5.23 | 4.8  | ATSKPALSALK                    | ITRAQ4plex@N-term;<br>ITRAQ4plex(K)@4;<br>ITRAQ4plex(K)@11                                            |                                        | -0.0170 | 1517.9337 | 506.9852 | 1517.9506 | 506.9908 | 3 | 30.70 |
|          | 5.23 | 4.8  | EGIDSLEK                       | Glu->pyro-Glu@N-term;<br>Oxidation(D)@4;<br>ITRAQ4plex(K)@8                                           |                                        | 0.0024  | 1031.5281 | 516.7713 | 1031.5257 | 516.7701 | 2 | 35.86 |
|          | 5.23 | 4.8  | ENLRWNSWGAYGQD<br>FFKVGQMGEILK | Glu->pyro-Glu@N-term;<br>Oxidation(N)@2;<br>ITRAQ4plex(K)@17;<br>Oxidation(M)@21;<br>ITRAQ4plex(K)@26 | missed R-W@4; missed K-V@17            | 0.2588  | 3445.9709 | 575.3358 | 3445.7121 | 575.2926 | 6 | 53.45 |
|          | 5.23 | 4.8  | GFTLGHFPQSFEYSTL<br>GGWIAAR    | ITRAQ4plex@N-term                                                                                     |                                        | 0.0210  | 2685.3672 | 672.3491 | 2685.3462 | 672.3438 | 4 | 28.39 |
|          | 5.23 | 4.8  | GLYAGTHLGEQWIHS<br>R           | ITRAQ4plex@N-term                                                                                     |                                        | -0.0124 | 1967.9963 | 657.0060 | 1968.0088 | 657.0102 | 3 | 37.33 |
|          | 5.23 | 4.8  | IEEILTSLK                      | ITRAQ4plex@N-term;<br>ITRAQ4plex(K)@9                                                                 |                                        | -0.0116 | 1332.7992 | 667.4069 | 1332.8108 | 667.4127 | 2 | 35.68 |
|          | 5.23 | 4.8  | ISGAK                          | ITRAQ4plex@N-term;<br>ITRAQ4plex(K)@5                                                                 |                                        | -0.0360 | 762.4484  | 763.4556 | 762.4843  | 763.4916 | 1 | 57.23 |
|          | 5.23 | 4.8  | SGAK                           | No ITRAQ4plex@N-term;<br>ITRAQ4plex(K)@4                                                              | cleaved I-S@N-term                     | 0.0115  | 505.3097  | 506.3170 | 505.2982  | 506.3055 | 1 | 61.14 |
| LIC11650 |      |      |                                |                                                                                                       |                                        |         |           |          |           |          |   |       |
|          | 1.7  | 2.6  | DKVFTLEYFOK                    | ITRAQ4plex@N-term;<br>ITRAQ4plex(K)@2;<br>Deamidated(Q)@10;<br>ITRAQ4plex(K)@11                       | cleaved L-D@N-term; missed K-V@2       | -0.0138 | 1850.0054 | 617.6757 | 1850.0191 | 617.6803 | 3 | 45.72 |
|          | 1.7  | 2.6  | FILR                           | No ITRAQ4plex@N-term                                                                                  |                                        | 0.0461  | 547.3944  | 548.4017 | 547.3482  | 548.3555 | 1 | 52.52 |
|          | 1.7  | 2.6  | GIFYDPFLK                      | ITRAQ4plex@N-term;<br>ITRAQ4plex(K)@9                                                                 |                                        | 0.0046  | 1386.7837 | 694.3991 | 1386.7791 | 694.3968 | 2 | 35.74 |
|          | 1.7  | 2.6  | IYYPIFLGFVFL                   | ITRAQ4plex@N-term;<br>Oxidation(F)@12;<br>Methylthio(C)@13                                            | cleaved Y-I@N-term; cleaved L-D@C-term | -0.0055 | 1912.9938 | 638.6719 | 1912.9993 | 638.6737 | 3 | 35.98 |
|          | 1.7  | 2.6  | LFAVRR                         | ITRAQ4plex@N-term                                                                                     | missed R-R@5                           | 0.0355  | 904.6084  | 453.3115 | 904.5729  | 453.2937 | 2 | 39.40 |
|          | 1.7  | 2.6  | NFIQAGNTVYYTQR                 | ITRAQ4plex@N-term;<br>Oxidation(F)@2;<br>Oxidation(Y)@10                                              |                                        | 0.0907  | 1849.9988 | 617.6735 | 1849.9081 | 617.6433 | 3 | 42.46 |
|          | 1.7  | 2.6  | RYSAPGGSKYTNFL<br>R            | ITRAQ4plex@N-term;<br>Oxidation(Y)@2;<br>ITRAQ4plex(K)@10;<br>Deamidated(N)@13;<br>Oxidation(F)@14    | missed R-Y@1; missed K-Y@10            | -0.0092 | 2136.1116 | 713.0444 | 2136.1207 | 713.0475 | 3 | 33.26 |
| LIC11643 |      |      |                                |                                                                                                       |                                        |         |           |          |           |          |   |       |
|          | 9.65 | 12.6 | AALGASLK                       | ITRAQ4plex@N-term;<br>ITRAQ4plex(K)@8                                                                 |                                        | -1.0004 | 1016.6422 | 509.3284 | 1017.6426 | 509.8286 | 2 | 37.87 |

|          |      |      |                         |                                                                                                   |                                        |         |           |           |           |           |   |       |
|----------|------|------|-------------------------|---------------------------------------------------------------------------------------------------|----------------------------------------|---------|-----------|-----------|-----------|-----------|---|-------|
|          | 9.65 | 12.6 | ASKEDQFSVVTPTAIA<br>GVR | ITRAQ4plex@N-term;<br>ITRAQ4plex(K)@3                                                             |                                        | -0.0185 | 2263.2231 | 755.4150  | 2263.2416 | 755.4211  | 3 | 50.46 |
|          | 9.65 | 12.6 | DIVNYYER                | ITRAQ4plex@N-term;<br>ITRAQ4plex(Y)@6                                                             |                                        | -0.0043 | 1358.7030 | 453.9083  | 1358.7074 | 453.9097  | 3 | 39.23 |
|          | 9.65 | 12.6 | ILHADLTEEK              | No ITRAQ4plex@N-term;<br>ITRAQ4plex(K)@10                                                         |                                        | -0.0035 | 1311.7122 | 656.8633  | 1311.7156 | 656.8651  | 2 | 38.92 |
|          | 9.65 | 12.6 | KLESEVAAR               | ITRAQ4plex@N-term; No<br>ITRAQ4plex(K)@1                                                          | missed K-L@1                           | -0.0014 | 1145.6512 | 573.8329  | 1145.6526 | 573.8336  | 2 | 35.89 |
|          | 9.65 | 12.6 | NITGVVK                 | ITRAQ4plex@N-term;<br>ITRAQ4plex(K)@7                                                             |                                        | 0.0128  | 1017.6555 | 509.8350  | 1017.6426 | 509.8286  | 2 | 37.16 |
|          | 9.65 | 12.6 | QVLISAPK                | Gln->pyro-Glu@N-term;<br>ITRAQ4plex(K)@8                                                          |                                        | -0.0168 | 981.5813  | 491.7979  | 981.5981  | 491.8063  | 2 | 41.78 |
|          | 9.65 | 12.6 | SINSHGNSDTRLALVS<br>GK  | No ITRAQ4plex@N-term;<br>ITRAQ4plex(K)@18                                                         | cleaved L-S@N-term; missed R-L@11      | -0.1654 | 1998.8915 | 1000.4530 | 1999.0569 | 1000.5357 | 2 | 29.34 |
|          | 9.65 | 12.6 | SKVDIQFADGSAIR          | ITRAQ4plex@N-term;<br>ITRAQ4plex(K)@2                                                             | missed K-V@2                           | -0.0356 | 1793.9524 | 598.9914  | 1793.9879 | 599.0033  | 3 | 42.88 |
|          | 9.65 | 12.6 | TIVTVDKDTTEK            | ITRAQ4plex@N-term;<br>ITRAQ4plex(K)@7;<br>ITRAQ4plex(K)@12                                        |                                        | -0.0046 | 1781.0101 | 594.6773  | 1781.0148 | 594.6789  | 3 | 39.22 |
|          | 9.65 | 12.6 | VLEGAVAVAPR             | No ITRAQ4plex@N-term                                                                              |                                        | 0.0183  | 1080.6475 | 541.3310  | 1080.6291 | 541.3218  | 2 | 37.44 |
| LIC11510 |      |      |                         |                                                                                                   |                                        |         |           |           |           |           |   |       |
|          | 2.02 | 1.6  | ANIN                    | ITRAQ4plex@N-term                                                                                 | cleaved F-A@N-term; cleaved N-H@C-term | 0.0049  | 574.3246  | 575.3318  | 574.3197  | 575.3269  | 1 | 37.85 |
|          | 2.02 | 1.6  | DIIFALK                 | ITRAQ4plex@N-term;<br>ITRAQ4plex(K)@7                                                             | cleaved Q-D@N-term                     | -0.0223 | 1106.6720 | 554.3433  | 1106.6943 | 554.3544  | 2 | 34.15 |
|          | 2.02 | 1.6  | EEIENYVTRVGIIQK         | Glu->pyro-Glu@N-term;<br>Deamidated(N)@5;<br>Oxidation(Y)@6;<br>ITRAQ4plex(K)@15                  | missed R-V@9                           | 0.0339  | 1933.0618 | 645.3612  | 1933.0278 | 645.3499  | 3 | 37.57 |
|          | 2.02 | 1.6  | GVSVFK                  | ITRAQ4plex@N-term;<br>ITRAQ4plex(K)@6                                                             | cleaved A-G@N-term                     | -0.0113 | 923.5571  | 462.7858  | 923.5684  | 462.7915  | 2 | 39.11 |
|          | 2.02 | 1.6  | IFALK                   | ITRAQ4plex@N-term;<br>ITRAQ4plex(K)@5                                                             | cleaved I-I@N-term                     | 0.0061  | 878.5894  | 440.3020  | 878.5833  | 440.2989  | 2 | 45.01 |
|          | 2.02 | 1.6  | LNDSIEAEK               | ITRAQ4plex@N-term;<br>Deamidated(N)@2;<br>Oxidation(D)@3;<br>ITRAQ4plex(K)@10                     |                                        | 0.0170  | 1409.7300 | 705.8723  | 1409.7129 | 705.8637  | 2 | 31.80 |
|          | 2.02 | 1.6  | LVTKPLEEAIQEVDDGIK      | ITRAQ4plex@N-term;<br>ITRAQ4plex(K)@4;<br>ITRAQ4plex(K)@17                                        |                                        | 0.0075  | 2313.3596 | 772.1271  | 2313.3521 | 772.1246  | 3 | 38.21 |
|          | 2.02 | 1.6  | NINFPGGNIAGNQKEV<br>ILR | ITRAQ4plex@N-term;<br>Oxidation(N)@12;<br>ITRAQ4plex(K)@14                                        |                                        | -0.1083 | 2357.1975 | 786.7398  | 2357.3059 | 786.7759  | 3 | 54.48 |
|          | 2.02 | 1.6  | NTQK                    | No ITRAQ4plex@N-term;<br>Deamidated(O)@3;<br>ITRAQ4plex(K)@4                                      |                                        | 0.0042  | 634.3450  | 635.3523  | 634.3408  | 635.3481  | 1 | 37.78 |
|          | 2.02 | 1.6  | NTQKVDDIK               | ITRAQ4plex@N-term;<br>Deamidated(Q)@3;<br>ITRAQ4plex(K)@4;<br>Oxidation(D)@8;<br>ITRAQ4plex(K)@10 | missed K-V@4                           | -0.0068 | 1607.9027 | 536.9749  | 1607.9096 | 536.9771  | 3 | 42.66 |
|          | 2.02 | 1.6  | SIGSLNIFVSNQLGK         | ITRAQ4plex@N-term;<br>ITRAQ4plex(K)@16                                                            |                                        | 0.0285  | 1978.1376 | 660.3865  | 1978.1091 | 660.3770  | 3 | 37.46 |
|          | 2.02 | 1.6  | VLVDFANQLK              | ITRAQ4plex@N-term;<br>Deamidated(N)@7;<br>Deamidated(Q)@8;<br>ITRAQ4plex(K)@10                    | cleaved I-V@N-term                     | -0.0872 | 1435.7294 | 718.8719  | 1435.8166 | 718.9156  | 2 | 14.71 |
| LIC11437 |      |      |                         |                                                                                                   |                                        |         |           |           |           |           |   |       |
|          | 4.01 | 3.3  | ATTEIAQGNFK             | ITRAQ4plex@N-term;<br>ITRAQ4plex(K)@11                                                            |                                        | -1.9856 | 1464.8118 | 733.4131  | 1466.7973 | 734.4059  | 2 | 28.17 |
|          | 4.01 | 3.3  | EALIKFNQGRGGEK          | ITRAQ4plex@N-term;<br>ITRAQ4plex(K)@5;<br>ITRAQ4plex(K)@14                                        | missed K-F@5; missed R-G@10            | 0.0051  | 1978.1376 | 660.3865  | 1978.1325 | 660.3848  | 3 | 37.46 |
|          | 4.01 | 3.3  | GKEEPQVIYAVLGR          | ITRAQ4plex@N-term;<br>ITRAQ4plex(K)@2                                                             |                                        | -0.0172 | 1846.0386 | 616.3535  | 1846.0556 | 616.3591  | 3 | 34.02 |
|          | 4.01 | 3.3  | IFNVEK                  | ITRAQ4plex@N-term;<br>ITRAQ4plex(K)@6                                                             | cleaved E-I@N-term                     | 0.0137  | 1036.6299 | 519.3222  | 1036.6161 | 519.3153  | 2 | 37.13 |
|          | 4.01 | 3.3  | NRPGLIQK                | ITRAQ4plex@N-term;<br>ITRAQ4plex(K)@8                                                             |                                        | -0.0266 | 1212.7280 | 405.2500  | 1212.7546 | 405.2588  | 3 | 28.60 |
|          | 4.01 | 3.3  | NSPS                    | No ITRAQ4plex@N-term                                                                              | cleaved T-N@N-term; cleaved S-S@C-term | 0.0259  | 403.1963  | 404.2035  | 403.1703  | 404.1776  | 1 | 46.96 |
|          | 4.01 | 3.3  | SSGSN                   | No ITRAQ4plex@N-term                                                                              | cleaved P-S@N-term; cleaved N-S@C-term | 0.0143  | 450.1854  | 451.1926  | 450.1710  | 451.1783  | 1 | 51.63 |
|          | 4.01 | 3.3  | TNSPSSATTQELSTS<br>QVK  | ITRAQ4plex@N-term;<br>ITRAQ4plex(K)@18                                                            |                                        | -0.0141 | 2153.0913 | 718.7044  | 2153.1055 | 718.7091  | 3 | 27.44 |

|          |      |      |                                       |                                                                                                                        |                                                                          |         |           |          |           |          |   |       |
|----------|------|------|---------------------------------------|------------------------------------------------------------------------------------------------------------------------|--------------------------------------------------------------------------|---------|-----------|----------|-----------|----------|---|-------|
|          | 4.01 | 3.3  | VLQNNLNLVNLGLK                        | ITRAQ4plex@N-term;<br>Deamidated(Q)@3;<br>Deamidated(N)@4;<br>Deamidated(N)@7;<br>Oxidation(N)@10;<br>ITRAQ4plex(K)@15 |                                                                          | -0.0550 | 1971.0946 | 658.0388 | 1971.1496 | 658.0571 | 3 | 31.96 |
| LIC11371 |      |      |                                       |                                                                                                                        |                                                                          |         |           |          |           |          |   |       |
|          | 4    | 15.0 | ADGSTTNSSTEIK                         | No ITRAQ4plex@N-term;<br>Deamidated(N)@7;<br>ITRAQ4plex(K)@13                                                          |                                                                          | 0.0299  | 1454.7158 | 728.3652 | 1454.6858 | 728.3502 | 2 | 37.96 |
|          | 4    | 15.0 | DEGPGIAGTLRRVVFIL<br>GLLCAALYYILK     | ITRAQ4plex@N-term;<br>Oxidation(D)@1;<br>Methylthio(C)@21;<br>Oxidation(Y)@25;<br>ITRAQ4plex(K)@29                     | missed R-V@12                                                            | -0.1402 | 3456.7971 | 865.2065 | 3456.9372 | 865.2416 | 4 | 55.13 |
|          | 4    | 15.0 | DLNSRISGNTGPPD<br>SGGGAAREEKRQQA<br>R | No ITRAQ4plex@N-term;<br>ITRAQ4plex(K)@25;<br>Oxidation(R)@26;<br>ITRAQ4plex(K)@27                                     | missed R-I@5; missed R-E@22; missed K-R@25; missed R-K@26; missed K-Q@27 | 0.0852  | 3456.8513 | 865.2201 | 3456.7662 | 865.1988 | 4 | 57.15 |
|          | 4    | 15.0 | ISGNTGPPDSSGGGA<br>AR                 | ITRAQ4plex@N-term                                                                                                      |                                                                          | 0.0045  | 1685.8136 | 843.9141 | 1685.8091 | 843.9118 | 2 | 24.26 |
|          | 4    | 15.0 | SAQNGTSQSNSEIQ<br>QESNPVEER           | ITRAQ4plex@N-term;<br>Deamidated(N)@4;<br>Deamidated(N)@10                                                             |                                                                          | -0.0019 | 2751.2170 | 918.0796 | 2751.2189 | 918.0802 | 3 | 27.37 |
| LIC11237 |      |      |                                       |                                                                                                                        |                                                                          |         |           |          |           |          |   |       |
|          | 2    | 4.3  | FANTVEVFNFLR                          | ITRAQ4plex@N-term                                                                                                      |                                                                          | -0.0058 | 1698.9158 | 850.4651 | 1698.9215 | 850.4680 | 2 | 52.84 |
|          | 2    | 4.3  | FHFVGGFDMHITK                         | ITRAQ4plex@N-term;<br>ITRAQ4plex(K)@13                                                                                 |                                                                          | 0.0929  | 1823.0361 | 608.6860 | 1822.9432 | 608.6550 | 3 | 33.88 |
|          | 2    | 4.3  | VFEGESNFDSK                           | ITRAQ4plex@N-term;<br>ITRAQ4plex(K)@12                                                                                 |                                                                          | 0.0267  | 1632.8142 | 817.4144 | 1632.7875 | 817.4010 | 2 | 29.20 |
| LIC11095 |      |      |                                       |                                                                                                                        |                                                                          |         |           |          |           |          |   |       |
|          | 6    | 12.5 | FLDIR                                 | ITRAQ4plex@N-term                                                                                                      | cleaved M-F@N-term                                                       | 0.1173  | 806.5945  | 404.3045 | 806.4772  | 404.2459 | 2 | 15.65 |
|          | 6    | 12.5 | GREEPVDVYELGK                         | ITRAQ4plex@N-term;<br>ITRAQ4plex(K)@13                                                                                 | missed R-E@2                                                             | -0.0025 | 1777.9429 | 593.6549 | 1777.9454 | 593.6557 | 3 | 31.25 |
|          | 6    | 12.5 | KEYTIIGDVVNLASR                       | ITRAQ4plex@N-term;<br>ITRAQ4plex(K)@1                                                                                  |                                                                          | -0.0011 | 1965.1128 | 656.0449 | 1965.1139 | 656.0452 | 3 | 36.70 |
|          | 6    | 12.5 | LLVTQAVYDDIKDTPV<br>GR                | ITRAQ4plex@N-term;<br>ITRAQ4plex(K)@12                                                                                 |                                                                          | -0.0057 | 2290.2717 | 764.4312 | 2290.2776 | 764.4332 | 3 | 36.13 |
|          | 6    | 12.5 | LSVLR                                 | No ITRAQ4plex@N-term                                                                                                   | cleaved I-L@N-term                                                       | -0.0213 | 586.3590  | 587.3663 | 586.3802  | 587.3875 | 1 | 57.91 |
|          | 6    | 12.5 | MNPGTAIYESTINRGL<br>NR                | ITRAQ4plex@N-term;<br>Deamidated(N)@2;<br>Deamidated(N)@13;<br>Oxidation(R)@14;<br>Deamidated(N)@17                    | missed R-G@14                                                            | -0.1647 | 2168.8845 | 723.9688 | 2169.0494 | 724.0237 | 3 | 21.84 |
|          | 6    | 12.5 | NESFSEFKRVCVMFL<br>DIR                | No ITRAQ4plex@N-term;<br>Oxidation(F)@7;<br>ITRAQ4plex(K)@8;<br>Methylthio(C)@11                                       | missed K-R@8; missed R-V@9                                               | 0.1687  | 2425.3401 | 809.4540 | 2425.1714 | 809.3978 | 3 | 39.76 |
|          | 6    | 12.5 | NPGTAIYESTINRGLN<br>RFLK              | ITRAQ4plex@N-term;<br>Oxidation(P)@2;<br>Oxidation(F)@18;<br>ITRAQ4plex(K)@20                                          | cleaved M-N@N-term; missed R-G@13;<br>missed R-F@17                      | 0.0799  | 2583.4812 | 862.1677 | 2583.4013 | 862.1410 | 3 | 42.78 |
|          | 6    | 12.5 | RSLISAMSAVQEK                         | ITRAQ4plex@N-term;<br>Oxidation(R)@1;<br>ITRAQ4plex(S)@2;<br>ITRAQ4plex(K)@13                                          | missed R-S@1                                                             | -0.0441 | 1867.0122 | 623.3447 | 1867.0563 | 623.3594 | 3 | 37.95 |
|          | 6    | 12.5 | SGIAAGLVGIQLK                         | No ITRAQ4plex@N-term;<br>ITRAQ4plex(K)@13                                                                              | cleaved F-S@N-term                                                       | 0.0021  | 1369.8436 | 457.6218 | 1369.8415 | 457.6211 | 3 | 26.26 |
| LIC11004 |      |      |                                       |                                                                                                                        |                                                                          |         |           |          |           |          |   |       |
|          | 8.23 | 36.0 | ESGNIVLDINGEIDLY<br>NAPEI             | Glu->pyro-Glu@N-term                                                                                                   | cleaved I-K@C-term                                                       | 0.0261  | 2382.2217 | 795.0812 | 2382.1955 | 795.0724 | 3 | 41.01 |
|          | 8.23 | 36.0 | IINVSGSVR                             | No ITRAQ4plex@N-term                                                                                                   |                                                                          | 0.0050  | 943.5501  | 472.7823 | 943.5451  | 472.7798 | 2 | 27.53 |
|          | 8.23 | 36.0 | IINVSGSVR                             | ITRAQ4plex@N-term                                                                                                      | cleaved I-I@N-term                                                       | 0.0134  | 974.5765  | 488.2955 | 974.5631  | 488.2888 | 2 | 26.82 |
|          | 8.23 | 36.0 | LTSFFEIFDNESEAVS<br>AFK               | ITRAQ4plex@N-term;<br>ITRAQ4plex(K)@19                                                                                 |                                                                          | -0.0111 | 2468.2244 | 823.7487 | 2468.2355 | 823.7524 | 3 | 40.21 |
|          | 8.23 | 36.0 | VFELTK                                | ITRAQ4plex@N-term;<br>ITRAQ4plex(K)@6                                                                                  |                                                                          | 0.0095  | 1023.6302 | 512.8224 | 1023.6208 | 512.8177 | 2 | 39.76 |
|          | 8.23 | 36.0 | VSYIDSSGIGALISLS<br>NLK               | ITRAQ4plex@N-term;<br>ITRAQ4plex(K)@20                                                                                 |                                                                          | -0.0167 | 2311.2712 | 771.4310 | 2311.2879 | 771.4366 | 3 | 40.48 |
|          | 8.23 | 36.0 | VSYIDSSGIGALISLS<br>NLK               | ITRAQ4plex@N-term;<br>ITRAQ4plex(K)@20;<br>ITRAQ4plex(K)@21                                                            | missed K-K@20                                                            | -0.0037 | 2583.4812 | 862.1677 | 2583.4849 | 862.1689 | 3 | 42.78 |
|          | 8.23 | 36.0 | YYTINLEK                              | ITRAQ4plex@N-term;<br>ITRAQ4plex(K)@9                                                                                  |                                                                          | 0.0088  | 1443.8306 | 722.9225 | 1443.8217 | 722.9181 | 2 | 32.65 |
| LIC10959 |      |      |                                       |                                                                                                                        |                                                                          |         |           |          |           |          |   |       |



|          |      |      |                           |                                                                                                                          |                                        |         |           |          |           |          |   |       |
|----------|------|------|---------------------------|--------------------------------------------------------------------------------------------------------------------------|----------------------------------------|---------|-----------|----------|-----------|----------|---|-------|
|          | 2    | 2.8  | AGVDIGKPPGGNK             | ITRAQ4plex@N-term;<br>ITRAQ4plex(K)@7;<br>ITRAQ4plex(K)@13                                                               |                                        | -0.0329 | 1640.9246 | 547.9821 | 1640.9575 | 547.9931 | 3 | 28.93 |
|          | 1.7  | 1.9  | IPLFR                     | ITRAQ4plex@N-term;<br>Oxidation(P)@2                                                                                     |                                        | 0.0497  | 804.5477  | 403.2811 | 804.4980  | 403.2563 | 2 | 45.19 |
|          | 1.7  | 1.9  | LACLEILGK                 | ITRAQ4plex@N-term;<br>Methylthio(C)@3;<br>ITRAQ4plex(K)@9                                                                |                                        | 0.0265  | 1292.7705 | 647.3925 | 1292.7440 | 647.3793 | 2 | 52.76 |
|          | 2    | 2.8  | QFALSK                    | ITRAQ4plex@N-term;<br>Deamidated(Q)@1;<br>ITRAQ4plex(K)@6                                                                |                                        | 0.0043  | 981.5782  | 491.7964 | 981.5739  | 491.7942 | 2 | 39.84 |
|          | 2    | 2.8  | SNARVCVVGAGPSGI<br>AAGK   | No ITRAQ4plex@N-term;<br>Methylthio(C)@6;<br>Oxidation(P)@12;<br>ITRAQ4plex(K)@19                                        | missed R-V@4                           | 0.0416  | 1919.0255 | 640.6824 | 1918.9839 | 640.6686 | 3 | 27.62 |
|          | 1.7  | 1.9  | VFNAK                     | ITRAQ4plex@N-term;<br>ITRAQ4plex(K)@5                                                                                    | cleaved W-V@N-term                     | 0.0381  | 865.5647  | 433.7896 | 865.5265  | 433.7705 | 2 | 40.56 |
|          | 2    | 2.8  | YPEYEGK                   | ITRAQ4plex@N-term;<br>ITRAQ4plex(K)@7                                                                                    |                                        | 0.0996  | 1172.6953 | 587.3549 | 1172.5957 | 587.3051 | 2 | 28.04 |
| LIC10902 |      |      |                           |                                                                                                                          |                                        |         |           |          |           |          |   |       |
|          | 3.32 | 7.8  | AGGLQ                     | No ITRAQ4plex@N-term                                                                                                     | cleaved S-A@N-term; cleaved Q-V@C-term | -0.0117 | 444.2216  | 445.2289 | 444.2332  | 445.2405 | 1 | 60.02 |
|          | 3.32 | 7.8  | DYIK                      | No ITRAQ4plex@N-term;<br>ITRAQ4plex(K)@4                                                                                 | cleaved G-D@N-term                     | 0.0320  | 681.4139  | 682.4212 | 681.3819  | 682.3892 | 1 | 55.75 |
|          | 3.32 | 7.8  | IGSSGNKNQNEVNSK           | ITRAQ4plex@N-term;<br>Deamidated(N)@6;<br>ITRAQ4plex(K)@7;<br>Deamidated(N)@10;<br>ITRAQ4plex(S)@14;<br>ITRAQ4plex(K)@15 | missed K-N@7                           | -0.0133 | 2153.1279 | 718.7166 | 2153.1411 | 718.7210 | 3 | 45.84 |
|          | 3.32 | 7.8  | ITPSIK                    | ITRAQ4plex@N-term;<br>ITRAQ4plex(K)@6                                                                                    | cleaved N-I@N-term                     | 0.0345  | 945.6447  | 473.8296 | 945.6103  | 473.8124 | 2 | 43.18 |
|          | 3.32 | 7.8  | LFPGSENIQTIK              | ITRAQ4plex@N-term;<br>Oxidation(P)@3;<br>Deamidated(N)@7;<br>ITRAQ4plex(K)@12                                            |                                        | 0.0268  | 1650.9341 | 826.4743 | 1650.9072 | 826.4609 | 2 | 51.49 |
|          | 3.32 | 7.8  | NSSV                      | ITRAQ4plex@N-term                                                                                                        | cleaved S-N@N-term; cleaved V-N@C-term | -0.0322 | 549.2558  | 550.2631 | 549.2880  | 550.2953 | 1 | 49.61 |
|          | 3.32 | 7.8  | SENTTKSQNTGTD<br>SQSK     | ITRAQ4plex@N-term;<br>ITRAQ4plex(K)@7;<br>Deamidated(Q)@9;<br>ITRAQ4plex(K)@18                                           | cleaved K-P@C-term; missed K-S@7       | 0.0528  | 2346.2039 | 783.0753 | 2346.1512 | 783.0577 | 3 | 30.32 |
|          | 3.32 | 7.8  | SQNTGTDSSQSKPLK           | ITRAQ4plex@N-term;<br>ITRAQ4plex(K)@11;<br>ITRAQ4plex(K)@15                                                              |                                        | -0.0215 | 1979.0435 | 660.6884 | 1979.0649 | 660.6956 | 3 | 27.24 |
|          | 3.32 | 7.8  | TEFKPSESTQAPSK            | ITRAQ4plex@N-term;<br>ITRAQ4plex(K)@4;<br>ITRAQ4plex(K)@14                                                               |                                        | -0.0028 | 1968.0502 | 657.0240 | 1968.0529 | 657.0249 | 3 | 27.56 |
| LIC10838 |      |      |                           |                                                                                                                          |                                        |         |           |          |           |          |   |       |
|          | 4    | 19.1 | AENSTSPIDTPK              | No ITRAQ4plex@N-term;<br>ITRAQ4plex(K)@13                                                                                |                                        | -0.0365 | 1503.7174 | 752.8660 | 1503.7539 | 752.8842 | 2 | 38.27 |
|          | 4    | 19.1 | DVKNPDEINYLQW<br>SLFK     | ITRAQ4plex@N-term;<br>ITRAQ4plex(K)@4;<br>ITRAQ4plex(K)@17                                                               |                                        | -0.0150 | 2540.3491 | 847.7903 | 2540.3640 | 847.7953 | 3 | 36.49 |
|          | 4    | 19.1 | VQNI EGLVDK               | ITRAQ4plex@N-term;<br>ITRAQ4plex(K)@10                                                                                   |                                        | 0.0063  | 1401.8134 | 701.9139 | 1401.8071 | 701.9108 | 2 | 30.93 |
| LIC10643 |      |      |                           |                                                                                                                          |                                        |         |           |          |           |          |   |       |
|          | 2    | 5.1  | DIQELETFSHVENPK<br>PIELPK | ITRAQ4plex@N-term;<br>ITRAQ4plex(K)@16;<br>ITRAQ4plex(K)@22                                                              |                                        | 0.0139  | 2993.6580 | 749.4218 | 2993.6439 | 749.4183 | 4 | 40.46 |
|          | 2    | 5.1  | IELPK                     | ITRAQ4plex@N-term;<br>ITRAQ4plex(K)@5                                                                                    | cleaved P-I@N-term                     | -0.0018 | 886.5713  | 444.2929 | 886.5731  | 444.2938 | 2 | 29.66 |
|          | 2    | 5.1  | IESQIHFRIFPNSV<br>R       | ITRAQ4plex@N-term;<br>Deamidated(Q)@4;<br>Deamidated(R)@8                                                                | missed R-I@8                           | -0.1499 | 2116.9529 | 706.6583 | 2117.1027 | 706.7082 | 3 | 22.28 |
|          | 2    | 5.1  | LQLPK                     | ITRAQ4plex@N-term;<br>Deamidated(Q)@2;<br>ITRAQ4plex(K)@5                                                                | cleaved I-L@N-term                     | -0.0018 | 886.5713  | 444.2929 | 886.5731  | 444.2938 | 2 | 29.66 |
|          | 2    | 5.1  | LTGTK                     | ITRAQ4plex@N-term;<br>ITRAQ4plex(K)@5                                                                                    | cleaved Q-L@N-term                     | 0.0936  | 806.6041  | 404.3093 | 806.5105  | 404.2625 | 2 | 8.83  |
|          | 2    | 5.1  | QTNPNEMFLLLEK<br>MQK      | ITRAQ4plex@N-term;<br>ITRAQ4plex(T)@2;<br>ITRAQ4plex(K)@13;<br>Deamidated(Q)@15;<br>ITRAQ4plex(K)@16                     | missed K-M@13                          | -0.0132 | 2540.3696 | 847.7972 | 2540.3830 | 847.8016 | 3 | 36.59 |
| LIC10623 |      |      |                           |                                                                                                                          |                                        |         |           |          |           |          |   |       |

|          |      |      |                            |                                                                                 |                                        |         |           |          |           |          |   |       |
|----------|------|------|----------------------------|---------------------------------------------------------------------------------|----------------------------------------|---------|-----------|----------|-----------|----------|---|-------|
|          | 2    | 4.4  | ASSLIKDLNRFVR              | No iTRAQ4plex@N-term;<br>iTRAQ4plex(K)@6;<br>Deamidated(N)@9                    | missed R-F@10                          | -0.0371 | 1662.9169 | 832.4657 | 1662.9539 | 832.4842 | 2 | 53.53 |
|          | 2    | 4.4  | EERAYINNWDLAGAR            | Glu->pyro-Glu@N-term                                                            | missed R-A@3                           | 0.0524  | 1758.8962 | 880.4554 | 1758.8438 | 880.4292 | 2 | 48.99 |
|          | 2    | 4.4  | IPGSESSVPGKE               | iTRAQ4plex@N-term;<br>iTRAQ4plex(K)@11                                          |                                        | -0.0085 | 1473.7833 | 737.8989 | 1473.7919 | 737.9032 | 2 | 27.77 |
| LIC10565 |      |      |                            |                                                                                 |                                        |         |           |          |           |          |   |       |
|          | 4    | 12.7 | IGFAEPLVGLPI               | iTRAQ4plex@N-term                                                               | cleaved I-T@C-term                     | 0.0108  | 1368.8247 | 685.4196 | 1368.8139 | 685.4142 | 2 | 36.46 |
|          | 4    | 12.7 | IGFAEPLVGLPITSALII<br>R    | iTRAQ4plex@N-term                                                               |                                        | 0.0104  | 2123.2944 | 708.7721 | 2123.2840 | 708.7686 | 3 | 41.65 |
|          | 4    | 12.7 | NGLLSEVGASLEELR            | iTRAQ4plex@N-term;<br>Deamidated(N)@1                                           |                                        | 0.0000  | 1730.9174 | 866.4659 | 1730.9172 | 866.4659 | 2 | 37.84 |
|          | 4    | 12.7 | NGLLSEVGASLEELRK           | iTRAQ4plex@N-term;<br>Deamidated(N)@1;<br>iTRAQ4plex(K)@16                      | missed R-K@15                          | 0.0144  | 2003.1285 | 668.7168 | 2003.1143 | 668.7120 | 3 | 37.24 |
|          | 4    | 12.7 | RRPVLTHAANY                | iTRAQ4plex@N-term;<br>Deamidated(R)@2;<br>Oxidation(H)@7                        | cleaved Y-S@C-term; missed R-R@1       | 0.0442  | 1457.8303 | 729.9224 | 1457.7861 | 729.9003 | 2 | 29.10 |
| LIC10546 |      |      |                            |                                                                                 |                                        |         |           |          |           |          |   |       |
|          | 4.17 | 7.3  | DKLGTYSYRIVYDK             | No iTRAQ4plex@N-term;<br>iTRAQ4plex(K)@2;<br>iTRAQ4plex(K)@15                   | missed K-L@2; missed R-Y@10            | -0.0573 | 2095.0623 | 699.3613 | 2095.1193 | 699.3804 | 3 | 31.47 |
|          | 4.17 | 7.3  | ENIEPSILSGIKTTSINP<br>ATEK | iTRAQ4plex@N-term;<br>Deamidated(N)@2;<br>iTRAQ4plex(K)@12;<br>iTRAQ4plex(K)@22 | missed K-T@12                          | -0.0937 | 2774.4341 | 925.8187 | 2774.5279 | 925.8499 | 3 | 47.68 |
|          | 4.17 | 7.3  | IGSFGETR                   | No iTRAQ4plex@N-term                                                            |                                        | 0.0971  | 865.5265  | 433.7705 | 865.4294  | 433.7220 | 2 | 28.94 |
|          | 4.17 | 7.3  | INEKNSIVAR                 | iTRAQ4plex@N-term;<br>Oxidation(N)@2;<br>iTRAQ4plex(K)@4;<br>Deamidated(N)@5    | missed K-N@4                           | -0.0472 | 1447.7765 | 483.5995 | 1447.8238 | 483.6152 | 3 | 29.18 |
|          | 4.17 | 7.3  | IPTLLISGR                  | No iTRAQ4plex@N-term                                                            |                                        | -0.0431 | 968.5588  | 485.2867 | 968.6019  | 485.3082 | 2 | 29.95 |
|          | 4.17 | 7.3  | ISYSNGLK                   | iTRAQ4plex@N-term;<br>Deamidated(N)@5;<br>iTRAQ4plex(K)@8                       |                                        | 0.0050  | 1169.6587 | 585.8366 | 1169.6536 | 585.8341 | 2 | 33.21 |
|          | 2.66 | 2.8  | IVAR                       | iTRAQ4plex@N-term                                                               | cleaved S-I@N-term                     | 0.0075  | 601.4109  | 602.4182 | 601.4033  | 602.4106 | 1 | 53.62 |
|          | 2.66 | 2.8  | LLDLR                      | No iTRAQ4plex@N-term                                                            | cleaved W-L@N-term                     | 0.0241  | 628.4149  | 629.4222 | 628.3908  | 629.3981 | 1 | 56.71 |
|          | 4.17 | 7.3  | NADKDIFIPIVSWLDK           | iTRAQ4plex@N-term;<br>iTRAQ4plex(K)@4;<br>iTRAQ4plex(K)@16                      |                                        | -1.0402 | 2304.2646 | 769.0955 | 2305.3047 | 769.4422 | 3 | 42.58 |
|          | 4.17 | 7.3  | SLDHKISYSNGLK              | iTRAQ4plex@N-term;<br>iTRAQ4plex(K)@5;<br>Oxidation(N)@10;<br>iTRAQ4plex(K)@13  | missed K-I@5                           | 0.0317  | 1909.0951 | 637.3723 | 1909.0634 | 637.3618 | 3 | 34.01 |
|          | 4.17 | 7.3  | SLEELLWHK                  | iTRAQ4plex@N-term;<br>iTRAQ4plex(K)@9                                           |                                        | 0.0000  | 1441.8171 | 481.6130 | 1441.8173 | 481.6130 | 3 | 35.01 |
|          | 2.66 | 2.8  | TAIK                       | iTRAQ4plex@N-term;<br>iTRAQ4plex(K)@4                                           | cleaved D-T@N-term                     | 0.0116  | 719.4901  | 720.4974 | 719.4785  | 720.4858 | 1 | 58.63 |
|          | 4.17 | 7.3  | TTSINPATEK                 | iTRAQ4plex@N-term;<br>iTRAQ4plex(K)@10                                          |                                        | -0.0058 | 1348.7384 | 675.3765 | 1348.7442 | 675.3794 | 2 | 25.78 |
| LIC10512 |      |      |                            |                                                                                 |                                        |         |           |          |           |          |   |       |
|          | 2    | 5.0  | FYFLIPEELEGGR              | iTRAQ4plex@N-term                                                               |                                        | 0.0139  | 1809.9563 | 905.9854 | 1809.9423 | 905.9784 | 2 | 39.66 |
|          | 2    | 5.0  | LIPEELEGGR                 | iTRAQ4plex@N-term                                                               | cleaved F-L@N-term                     | -0.0328 | 1352.7094 | 451.9104 | 1352.7422 | 451.9213 | 3 | 26.04 |
| LIC10507 |      |      |                            |                                                                                 |                                        |         |           |          |           |          |   |       |
|          | 4.07 | 11.4 | AESMK                      | iTRAQ4plex@N-term;<br>iTRAQ4plex(K)@5                                           | cleaved N-A@N-term                     | 0.0456  | 852.5075  | 427.2610 | 852.4619  | 427.2382 | 2 | 26.62 |
|          | 4.07 | 11.4 | FINNLVFL                   | iTRAQ4plex@N-term;<br>Deamidated(N)@3                                           | cleaved I-F@N-term; cleaved L-L@C-term | 0.0218  | 1123.6617 | 562.8381 | 1123.6399 | 562.8272 | 2 | 30.35 |
|          | 4.07 | 11.4 | FYKHPEVYNLEVK              | iTRAQ4plex@N-term; No<br>iTRAQ4plex(K)@3; Methyl(E)@6;<br>iTRAQ4plex(K)@13      | missed K-H@3                           | -0.0556 | 1967.0205 | 656.6808 | 1967.0760 | 656.6993 | 3 | 32.43 |
|          | 4.07 | 11.4 | LFDLPNK                    | iTRAQ4plex@N-term;<br>Oxidation(N)@6;<br>iTRAQ4plex(K)@7                        |                                        | 0.0373  | 1149.7010 | 575.8578 | 1149.6637 | 575.8391 | 2 | 32.82 |
|          | 4.07 | 11.4 | SOEELAKEEEK                | iTRAQ4plex@N-term;<br>iTRAQ4plex(K)@7;<br>iTRAQ4plex(K)@11                      |                                        | -0.0226 | 1750.9088 | 584.6436 | 1750.9314 | 584.6511 | 3 | 28.00 |
|          | 4.07 | 11.4 | VSGVIDVLSAELR              | iTRAQ4plex@N-term                                                               |                                        | -0.0315 | 1500.8318 | 751.4232 | 1500.8633 | 751.4389 | 2 | 47.45 |
|          | 4.07 | 11.4 | VVNSS                      | No iTRAQ4plex@N-term                                                            | cleaved E-V@N-term; cleaved S-I@C-term | 0.0458  | 504.3002  | 505.3075 | 504.2544  | 505.2617 | 1 | 56.17 |
| LIC10220 |      |      |                            |                                                                                 |                                        |         |           |          |           |          |   |       |
|          | 2    | 5.4  | DGGDLREVLIPTR              | iTRAQ4plex@N-term;<br>Oxidation(R)@6                                            | missed R-E@6                           | -0.0348 | 1599.8354 | 534.2858 | 1599.8702 | 534.2973 | 3 | 29.13 |
|          | 2    | 5.4  | FSLDGEAILEAHK              | iTRAQ4plex@N-term;<br>iTRAQ4plex(K)@14                                          |                                        | 0.0093  | 1830.0223 | 611.0147 | 1830.0131 | 611.0116 | 3 | 38.06 |

|          |      |      |                         |                                                                                                   |                                                   |         |           |          |           |          |   |       |
|----------|------|------|-------------------------|---------------------------------------------------------------------------------------------------|---------------------------------------------------|---------|-----------|----------|-----------|----------|---|-------|
|          | 2    | 5.4  | TTLSQLTEPMIEPYL         | ITRAQ4plex@N-term;<br>Deamidated(Q)@5                                                             | cleaved L-K@C-term                                | 0.0087  | 1879.9698 | 940.9922 | 1879.9611 | 940.9878 | 2 | 30.26 |
|          | 2    | 5.4  | VLGAV                   | No ITRAQ4plex@N-term                                                                              | cleaved V-L@C-term                                | -0.0344 | 457.2557  | 458.2630 | 457.2900  | 458.2973 | 1 | 0.29  |
| LIC10209 |      |      |                         |                                                                                                   |                                                   |         |           |          |           |          |   |       |
|          | 2    | 9.6  | GIWSWLTIDHK             | ITRAQ4plex@N-term;<br>ITRAQ4plex(K)@12                                                            |                                                   | -0.0003 | 1743.9548 | 582.3256 | 1743.9552 | 582.3257 | 3 | 39.22 |
|          | 2    | 9.6  | GNFILPIQLGAKDVAF<br>PR  | ITRAQ4plex@N-term;<br>Oxidation(N)@2;<br>ITRAQ4plex(K)@12                                         | cleaved F-G@N-term                                | -0.0674 | 2259.2310 | 754.0842 | 2259.2983 | 754.1067 | 3 | 46.44 |
|          | 2    | 9.6  | IAVIHGLIAGK             | ITRAQ4plex@N-term;<br>ITRAQ4plex(K)@11                                                            | cleaved L-I@N-term                                | 0.0018  | 1378.8922 | 460.6380 | 1378.8904 | 460.6374 | 3 | 34.39 |
|          | 2    | 9.6  | LELFTPGQTLGFVT          | ITRAQ4plex@N-term;<br>Deamidated(Q)@8                                                             | cleaved T-P@C-term                                | -0.0005 | 1666.8934 | 556.6384 | 1666.8940 | 556.6386 | 3 | 47.08 |
|          | 2    | 9.6  | MTGAGIAAFSLFTQK         | ITRAQ4plex@N-term;<br>Oxidation(F)@12;<br>Deamidated(Q)@14;<br>ITRAQ4plex(K)@15                   | cleaved F-M@N-term                                | 0.0382  | 1847.0125 | 616.6781 | 1846.9743 | 616.6654 | 3 | 33.45 |
|          | 10   | 10.3 | PVITGGPYEYR             | ITRAQ4plex@N-term;<br>ITRAQ4plex(Y)@10                                                            | cleaved T-P@N-term                                | -0.0630 | 1538.7708 | 770.3926 | 1538.8337 | 770.4241 | 2 | 39.91 |
|          | 10   | 10.3 | STATASHTDNYLNHE<br>K    | Carbamyl@N-term;<br>ITRAQ4plex(K)@16                                                              | cleaved M-S@N-term                                | 0.0070  | 1974.9222 | 659.3147 | 1974.9153 | 659.3124 | 3 | 37.16 |
|          | 2    | 9.6  | TAGDNPWGGK              | ITRAQ4plex@N-term;<br>ITRAQ4plex(K)@10                                                            |                                                   | -0.0013 | 1289.6595 | 645.8370 | 1289.6608 | 645.8377 | 2 | 27.89 |
|          | 2    | 9.6  | TLEWTISSPPTHENFE<br>K   | ITRAQ4plex@N-term;<br>ITRAQ4plex(K)@17                                                            |                                                   | -0.0185 | 2303.1492 | 768.7237 | 2303.1677 | 768.7299 | 3 | 32.59 |
|          | 2    | 9.6  | TPVITGGPYEYR            | ITRAQ4plex@N-term                                                                                 |                                                   | -0.0654 | 1495.7139 | 748.8642 | 1495.7793 | 748.8969 | 2 | 29.78 |
| LIC10162 |      |      |                         |                                                                                                   |                                                   |         |           |          |           |          |   |       |
|          | 4    | 6.7  | DLLH                    | ITRAQ4plex@N-term                                                                                 | cleaved M-D@N-term; cleaved H-D@C-term            | -0.0038 | 640.3628  | 641.3701 | 640.3666  | 641.3739 | 1 | 56.98 |
|          | 4    | 6.7  | DMRSLTFSEIR             | ITRAQ4plex@N-term;<br>Oxidation(F)@7                                                              | missed R-S@3                                      | 0.0472  | 1513.8153 | 505.6124 | 1513.7681 | 505.5966 | 3 | 33.26 |
|          | 4    | 6.7  | GELVDALEQFFEEFD<br>ESK  | ITRAQ4plex@N-term;<br>ITRAQ4plex(K)@18                                                            |                                                   | 0.0240  | 2419.1914 | 807.4044 | 2419.1675 | 807.3964 | 3 | 43.32 |
|          | 4    | 6.7  | ISAEMESGRK              | ITRAQ4plex@N-term;<br>ITRAQ4plex(S)@7;<br>Deamidated(R)@10;<br>ITRAQ4plex(K)@11                   | missed R-K@10                                     | -0.0309 | 1636.8511 | 819.4328 | 1636.8820 | 819.4483 | 2 | 26.31 |
|          | 4    | 6.7  | LAIEVLK                 | ITRAQ4plex@N-term;<br>ITRAQ4plex(K)@8                                                             |                                                   | 0.0087  | 1143.7557 | 572.8851 | 1143.7471 | 572.8808 | 2 | 46.66 |
|          | 4    | 6.7  | MATAK                   | ITRAQ4plex@N-term;<br>ITRAQ4plex(K)@5                                                             | cleaved T-M@N-term                                | 0.0346  | 808.5067  | 405.2606 | 808.4720  | 405.2433 | 2 | 29.09 |
|          | 4    | 6.7  | NYMDLLHDMGLMVLK         | ITRAQ4plex@N-term;<br>ITRAQ4plex(K)@15                                                            |                                                   | 0.9914  | 2081.0679 | 694.6965 | 2080.0763 | 694.3660 | 3 | 43.21 |
|          | 4    | 6.7  | VMIAVGEARYIK            | ITRAQ4plex@N-term;<br>ITRAQ4plex(Y)@10;<br>ITRAQ4plex(K)@12                                       | missed R-Y@9                                      | -0.0385 | 1781.0212 | 594.6810 | 1781.0599 | 594.6939 | 3 | 36.70 |
|          | 4    | 6.7  | VYVINNTPOAK             | ITRAQ4plex@N-term;<br>Oxidation(Y)@2;<br>ITRAQ4plex(K)@11                                         |                                                   | -0.0479 | 1549.8229 | 775.9187 | 1549.8708 | 775.9427 | 2 | 47.44 |
| LIC10094 |      |      |                         |                                                                                                   |                                                   |         |           |          |           |          |   |       |
|          | 5.13 | 4.8  | AKPSFMAFAPR             | ITRAQ4plex@N-term;<br>ITRAQ4plex(K)@2                                                             |                                                   | 0.0249  | 1509.8618 | 504.2946 | 1509.8370 | 504.2863 | 3 | 50.76 |
|          | 5.13 | 4.8  | AYLT                    | ITRAQ4plex@N-term                                                                                 | cleaved L-A@N-term; cleaved T-L@C-term            | 0.0099  | 610.3547  | 611.3619 | 610.3448  | 611.3521 | 1 | 54.11 |
|          | 5.13 | 4.8  | ENRNIMKSLVIGIR          | ITRAQ4plex@N-term;<br>Deamidated(N)@2;<br>Deamidated(R)@3;<br>Deamidated(N)@4;<br>ITRAQ4plex(K)@7 | cleaved Y-E@N-term; missed R-N@3;<br>missed K-S@7 | -0.0283 | 1933.0627 | 967.5386 | 1933.0910 | 967.5528 | 2 | 52.00 |
|          | 2.82 | 1.6  | GIVFVK                  | ITRAQ4plex@N-term;<br>ITRAQ4plex(K)@6                                                             |                                                   | 0.0107  | 949.6311  | 475.8228 | 949.6204  | 475.8175 | 2 | 41.57 |
|          | 5.13 | 4.8  | GTDVTESELEYILNHS<br>EAK | ITRAQ4plex@N-term;<br>ITRAQ4plex(K)@19                                                            |                                                   | 0.0026  | 2422.2134 | 808.4117 | 2422.2107 | 808.4109 | 3 | 36.01 |
|          | 5.13 | 4.8  | IDEIHK                  | ITRAQ4plex@N-term;<br>ITRAQ4plex(K)@6                                                             |                                                   | 0.0100  | 1017.6414 | 509.8280 | 1017.6314 | 509.8230 | 2 | 38.04 |
|          | 5.13 | 4.8  | IVFIENDK                | ITRAQ4plex@N-term;<br>Oxidation(F)@3;<br>Deamidated(N)@6;<br>ITRAQ4plex(K)@8                      |                                                   | 0.0418  | 1281.7478 | 641.8812 | 1281.7060 | 641.8603 | 2 | 40.29 |
|          | 5.13 | 4.8  | KPFVEGDELTLNLLK         | ITRAQ4plex@N-term;<br>ITRAQ4plex(K)@1;<br>ITRAQ4plex(K)@14                                        |                                                   | -0.0163 | 2034.1564 | 679.0594 | 2034.1727 | 679.0648 | 3 | 36.89 |
|          | 2.82 | 1.6  | KSLVIGIR                | ITRAQ4plex@N-term;<br>ITRAQ4plex(K)@1                                                             | cleaved M-K@N-term; missed K-S@1                  | -0.0586 | 1172.7263 | 587.3704 | 1172.7849 | 587.3997 | 2 | 57.66 |
|          | 2.82 | 1.6  | LAYFFSK                 | ITRAQ4plex@N-term;<br>ITRAQ4plex(K)@7                                                             |                                                   | -0.0046 | 1162.6584 | 582.3365 | 1162.6630 | 582.3388 | 2 | 46.96 |

|          |      |      |                                            |                                                                                                                                                       |                                          |         |           |           |           |           |   |       |
|----------|------|------|--------------------------------------------|-------------------------------------------------------------------------------------------------------------------------------------------------------|------------------------------------------|---------|-----------|-----------|-----------|-----------|---|-------|
|          | 5.13 | 4.8  | LEWILTDYAVQFSGAA<br>NVPR                   | ITRAQ4plex @N-term;<br>Deamidated(Q) @11                                                                                                              |                                          | -0.0054 | 2394.2288 | 799.0836  | 2394.2341 | 799.0853  | 3 | 49.38 |
|          | 2.82 | 1.6  | PPIR                                       | ITRAQ4plex @N-term                                                                                                                                    | cleaved T-P @N-term                      | 0.0201  | 625.4235  | 626.4307  | 625.4033  | 626.4106  | 1 | 58.78 |
|          | 5.13 | 4.8  | SGIQ                                       | ITRAQ4plex @N-term                                                                                                                                    | cleaved S-S @N-term; cleaved Q-T @C-term | -0.0049 | 547.3039  | 548.3112  | 547.3088  | 548.3160  | 1 | 41.87 |
|          | 5.13 | 4.8  | SPFIK                                      | ITRAQ4plex @N-term;<br>ITRAQ4plex(K) @5                                                                                                               | cleaved E-S @N-term                      | 0.0493  | 878.5962  | 440.3054  | 878.5469  | 440.2807  | 2 | 45.22 |
|          | 5.13 | 4.8  | YGRPVFWSK                                  | ITRAQ4plex @N-term;<br>ITRAQ4plex(K) @10                                                                                                              |                                          | 0.0199  | 1541.8434 | 514.9551  | 1541.8234 | 514.9484  | 3 | 32.25 |
| LIC10009 |      |      |                                            |                                                                                                                                                       |                                          |         |           |           |           |           |   |       |
|          | 6    | 13.9 | GMYCLEQEVIQEFISK                           | ITRAQ4plex @N-term;<br>Methylthio(C) @4;<br>ITRAQ4plex(K) @15                                                                                         |                                          | 0.0286  | 2137.0425 | 713.3547  | 2137.0138 | 713.3452  | 3 | 38.79 |
|          | 6    | 13.9 | KQEAQILGNR                                 | ITRAQ4plex @N-term;<br>ITRAQ4plex(K) @1                                                                                                               | missed K-Q @1                            | -0.0388 | 1443.8013 | 482.2744  | 1443.8401 | 482.2873  | 3 | 29.30 |
|          | 6    | 13.9 | LLIII                                      | ITRAQ4plex @N-term                                                                                                                                    | cleaved L-L @N-term; cleaved I-G @C-term | 0.0124  | 727.5453  | 728.5526  | 727.5329  | 728.5402  | 1 | 55.80 |
|          | 6    | 13.9 | QDEFNTDINTLAGK                             | Gln->pyro-Glu @N-term;<br>Oxidation(D) @7;<br>Deamidated(N) @9;<br>ITRAQ4plex(K) @14                                                                  |                                          | 0.0147  | 1708.8060 | 855.4103  | 1708.7914 | 855.4030  | 2 | 28.08 |
|          | 6    | 13.9 | QEFSK                                      | ITRAQ4plex @N-term;<br>ITRAQ4plex(K) @5                                                                                                               | cleaved I-Q @N-term                      | -0.0500 | 925.4613  | 463.7379  | 925.5113  | 463.7629  | 2 | 30.30 |
|          | 6    | 13.9 | VPGSDKKEDQVSLVY<br>GMEEVTGLENVEAVEV<br>TTK | ITRAQ4plex @N-term;<br>ITRAQ4plex(S) @4;<br>ITRAQ4plex(K) @6;<br>ITRAQ4plex(K) @7;<br>Deamidated(Q) @10;<br>Trioxidation(Y) @15;<br>ITRAQ4plex(K) @33 | missed K-K @6                            | -0.2439 | 4348.9854 | 870.8043  | 4349.2293 | 870.8531  | 5 | 52.61 |
|          | 6    | 13.9 | YANFDQWIYK                                 | ITRAQ4plex @N-term;<br>ITRAQ4plex(K) @10                                                                                                              |                                          | -0.0571 | 1634.7766 | 545.9328  | 1634.8337 | 545.9518  | 3 | 35.33 |
|          | 6    | 13.9 | YNSVSDDEEK                                 | ITRAQ4plex @N-term;<br>ITRAQ4plex(K) @9                                                                                                               |                                          | -0.0140 | 1357.6465 | 679.8305  | 1357.6605 | 679.8375  | 2 | 26.58 |
| LIC20172 |      |      |                                            |                                                                                                                                                       |                                          |         |           |           |           |           |   |       |
|          | 2    | 2.4  | IFIK                                       | ITRAQ4plex @N-term;<br>ITRAQ4plex(K) @4                                                                                                               | cleaved D-I @N-term                      | 0.0187  | 807.5649  | 404.7897  | 807.5462  | 404.7804  | 2 | 43.69 |
|          | 2    | 2.4  | ILILL                                      | ITRAQ4plex @N-term                                                                                                                                    | cleaved L-I @C-term                      | 0.0124  | 727.5453  | 728.5526  | 727.5329  | 728.5402  | 1 | 55.80 |
|          | 2    | 2.4  | NAILIAILLIGAAVAYI<br>LKR                   | ITRAQ4plex @N-term;<br>ITRAQ4plex(K) @21                                                                                                              | missed K-R @21                           | -0.1789 | 2524.4287 | 632.1144  | 2524.6076 | 632.1592  | 4 | 39.95 |
|          | 2    | 2.4  | QTGY                                       | Gln->pyro-Glu @N-term                                                                                                                                 | cleaved A-Q @N-term; cleaved Y-K @C-term | 0.0103  | 450.1854  | 451.1926  | 450.1751  | 451.1823  | 1 | 51.63 |
|          | 2    | 2.4  | VFPVPDESELMGFL<br>LR                       | ITRAQ4plex @N-term                                                                                                                                    |                                          | 0.0150  | 2107.0930 | 1054.5540 | 2107.0782 | 1054.5464 | 2 | 41.13 |
| LIC12452 |      |      |                                            |                                                                                                                                                       |                                          |         |           |           |           |           |   |       |
|          | 2    | 7.0  | EILDELILDYSEK                              | ITRAQ4plex @N-term;<br>Oxidation(D) @4;<br>ITRAQ4plex(K) @13                                                                                          |                                          | 0.0664  | 1883.0684 | 628.6967  | 1883.0019 | 628.6746  | 3 | 37.03 |
|          | 2    | 7.0  | EVGGRPALYGTTK                              | ITRAQ4plex @N-term;<br>ITRAQ4plex(K) @13                                                                                                              |                                          | -0.0001 | 1675.9501 | 559.6573  | 1675.9501 | 559.6573  | 3 | 29.01 |
|          | 2    | 7.0  | IAGAY                                      | ITRAQ4plex @N-term                                                                                                                                    | cleaved E-I @N-term; cleaved Y-Q @C-term | 0.0330  | 637.3887  | 638.3960  | 637.3557  | 638.3630  | 1 | 55.89 |
|          | 2    | 7.0  | SSLDTLAIYKQPITLP<br>EIDEIRGVSSR            | ITRAQ4plex @N-term;<br>ITRAQ4plex(K) @12;<br>Deamidated(Q) @13                                                                                        | missed K-Q @12; missed R-G @24           | -0.0275 | 3473.8950 | 869.4810  | 3473.9225 | 869.4879  | 4 | 55.31 |
| LIC11267 |      |      |                                            |                                                                                                                                                       |                                          |         |           |           |           |           |   |       |
|          | 2.23 | 3.0  | AYLK                                       | No ITRAQ4plex @N-term;<br>ITRAQ4plex(K) @4                                                                                                            |                                          | -0.0048 | 637.3873  | 638.3946  | 637.3921  | 638.3994  | 1 | 56.42 |
|          | 2.23 | 3.0  | DKYEVVIPSLSILAE                            | ITRAQ4plex @N-term;<br>ITRAQ4plex(K) @2                                                                                                               | cleaved E-P @C-term; missed K-Y @2       | 0.0000  | 1963.1122 | 655.3780  | 1963.1121 | 655.3780  | 3 | 37.23 |
|          | 2.23 | 3.0  | FNNDTNKVQDFIK                              | No ITRAQ4plex @N-term;<br>Oxidation(N) @3;<br>ITRAQ4plex(K) @7;<br>ITRAQ4plex(K) @13                                                                  | missed K-V @7                            | 0.0592  | 1886.0370 | 629.6863  | 1885.9778 | 629.6665  | 3 | 40.14 |
|          | 2.23 | 3.0  | NIKDWDDLK                                  | ITRAQ4plex @N-term;<br>ITRAQ4plex(K) @3;<br>ITRAQ4plex(K) @10                                                                                         |                                          | -0.0228 | 1676.9235 | 559.9818  | 1676.9463 | 559.9894  | 3 | 35.26 |
|          | 2.23 | 3.0  | WNYLAAWAFAQK                               | ITRAQ4plex @N-term;<br>ITRAQ4plex(K) @12                                                                                                              |                                          | 0.0268  | 1755.9609 | 586.3276  | 1755.9340 | 586.3186  | 3 | 37.35 |
| LIC12250 |      |      |                                            |                                                                                                                                                       |                                          |         |           |           |           |           |   |       |
|          | 2.3  | 2.0  | ADFTLK                                     | ITRAQ4plex @N-term;<br>ITRAQ4plex(K) @6                                                                                                               |                                          | 0.0100  | 981.5839  | 491.7992  | 981.5739  | 491.7942  | 2 | 38.48 |
|          | 4.19 | 4.1  | ALILDLR                                    | ITRAQ4plex @N-term                                                                                                                                    |                                          | 0.0118  | 956.6259  | 479.3202  | 956.6141  | 479.3143  | 2 | 45.46 |
|          | 4.19 | 4.1  | DFDNVSHVSR                                 | CarbamyI @N-term;<br>ITRAQ4plex(S) @7                                                                                                                 |                                          | 0.0048  | 1460.7178 | 487.9132  | 1460.7130 | 487.9116  | 3 | 42.60 |

|          |      |      |                               |                                                                                                                           |                                                         |         |           |          |           |          |   |       |
|----------|------|------|-------------------------------|---------------------------------------------------------------------------------------------------------------------------|---------------------------------------------------------|---------|-----------|----------|-----------|----------|---|-------|
|          | 2.3  | 2.0  | DFDNVSHVSRYYIDK               | ITRAQ4plex@N-term;<br>Deamidated(N)@4;<br>Deamidated(R)@11;<br>ITRAQ4plex(K)@16                                           | missed R-Y@11                                           | -0.0726 | 2246.0374 | 749.6864 | 2246.1099 | 749.7106 | 3 | 41.34 |
|          | 2.3  | 2.0  | EAAIYALLSLPHSIYLY<br>PESYFKER | ITRAQ4plex@N-term;<br>ITRAQ4plex(Y)@17;<br>ITRAQ4plex(K)@23                                                               |                                                         | -0.1931 | 3404.6455 | 852.1686 | 3404.8386 | 852.2169 | 4 | 42.14 |
|          | 2.3  | 2.0  | GVPGLHIEVVR                   | ITRAQ4plex@N-term                                                                                                         |                                                         | 0.0084  | 1419.8403 | 474.2874 | 1419.8320 | 474.2846 | 3 | 31.67 |
|          | 2.3  | 2.0  | IDKNIDKNR                     | ITRAQ4plex@N-term;<br>ITRAQ4plex(K)@3;<br>ITRAQ4plex(K)@7                                                                 | cleaved Y-I@N-term; missed K-N@3;<br>missed K-N@7       | -0.0236 | 1546.8922 | 516.6380 | 1546.9157 | 516.6458 | 3 | 44.35 |
|          | 2.3  | 2.0  | IQDGSFEGIGAILSGG<br>GNK       | ITRAQ4plex@N-term;<br>ITRAQ4plex(K)@19                                                                                    |                                                         | 0.0457  | 2107.1611 | 703.3943 | 2107.1153 | 703.3790 | 3 | 35.16 |
|          | 2.3  | 2.0  | SEEGPSVDREIEK                 | ITRAQ4plex@N-term;<br>ITRAQ4plex(K)@14                                                                                    | missed R-E@9                                            | 0.0030  | 1874.9858 | 626.0026 | 1874.9829 | 626.0016 | 3 | 29.68 |
|          | 4.19 | 4.1  | SGDVILAVDGKSIK                | No ITRAQ4plex@N-term;<br>Oxidation(D)@9;<br>ITRAQ4plex(K)@11;<br>ITRAQ4plex(K)@14                                         | missed K-S@11                                           | -0.0196 | 1704.9669 | 569.3296 | 1704.9865 | 569.3361 | 3 | 45.47 |
|          | 4.19 | 4.1  | SLDYIEALLSTQK                 | ITRAQ4plex@N-term;<br>ITRAQ4plex(K)@13                                                                                    |                                                         | 0.0283  | 1768.0145 | 590.3455 | 1767.9862 | 590.3360 | 3 | 50.19 |
|          | 2.3  | 2.0  | VSDEEVK                       | ITRAQ4plex@N-term;<br>ITRAQ4plex(K)@7                                                                                     |                                                         | 0.0114  | 1092.6021 | 547.3083 | 1092.5906 | 547.3026 | 2 | 29.68 |
| LIC12303 |      |      |                               |                                                                                                                           |                                                         |         |           |          |           |          |   |       |
|          | 2    | 2.6  | GLISSLGDPHSR                  | Carbamyl@N-term                                                                                                           |                                                         | -0.0080 | 1280.6394 | 641.3270 | 1280.6473 | 641.3309 | 2 | 43.01 |
|          | 2    | 2.6  | LDLELDPQLR                    | ITRAQ4plex@N-term;<br>Deamidated(Q)@8                                                                                     | cleaved I-L@N-term                                      | 0.0910  | 1355.8329 | 452.9516 | 1355.7418 | 452.9212 | 3 | 43.99 |
| LIC13471 |      |      |                               |                                                                                                                           |                                                         |         |           |          |           |          |   |       |
|          | 2    | 18.3 | GIAIPPELYDEIK                 | ITRAQ4plex@N-term;<br>ITRAQ4plex(K)@13                                                                                    |                                                         | -0.0038 | 1744.9817 | 873.4981 | 1744.9855 | 873.5000 | 2 | 34.70 |
| LIC10578 |      |      |                               |                                                                                                                           |                                                         |         |           |          |           |          |   |       |
|          | 2    | 2.1  | ASILGLAAAFQINEDLKL<br>FK      | ITRAQ4plex@N-term;<br>Deamidated(Q)@10;<br>Deamidated(N)@12;<br>Oxidation(D)@14;<br>ITRAQ4plex(K)@16;<br>ITRAQ4plex(K)@19 | missed K-L@16                                           | -0.0769 | 2540.3696 | 847.7972 | 2540.4467 | 847.8228 | 3 | 36.59 |
|          | 2    | 2.1  | IAIEALGIHK                    | ITRAQ4plex@N-term;<br>ITRAQ4plex(K)@10                                                                                    |                                                         | -0.0015 | 1351.8417 | 451.6212 | 1351.8431 | 451.6216 | 3 | 32.62 |
|          | 5.4  | 6.8  | IALTHPIPR                     | Carbamyl@N-term                                                                                                           |                                                         | 0.0879  | 1059.7068 | 530.8607 | 1059.6189 | 530.8167 | 2 | 41.11 |
|          | 2    | 2.1  | IALTHPIPRVR                   | ITRAQ4plex@N-term                                                                                                         | missed R-V@9                                            | 0.0026  | 1415.8872 | 472.9697 | 1415.8847 | 472.9688 | 3 | 30.07 |
|          | 2    | 2.1  | IALTHPIPRVRAAAVLA<br>IGR      | ITRAQ4plex@N-term;<br>Oxidation(P)@8                                                                                      | missed R-V@9; missed R-A@11                             | 0.1350  | 2254.5222 | 752.5146 | 2254.3872 | 752.4697 | 3 | 56.25 |
|          | 5.4  | 6.8  | ILEQTLETKPQYVK                | ITRAQ4plex@N-term;<br>ITRAQ4plex(K)@9;<br>ITRAQ4plex(K)@14                                                                |                                                         | -0.0299 | 2121.2112 | 708.0777 | 2121.2411 | 708.0876 | 3 | 45.16 |
|          | 2    | 2.1  | TDATEDDAENSDDPK               | ITRAQ4plex@N-term;<br>Oxidation(D)@7;<br>ITRAQ4plex(K)@14                                                                 |                                                         | 0.1250  | 1810.9199 | 906.4672 | 1810.7948 | 906.4047 | 2 | 38.66 |
|          | 2    | 2.1  | VRAAAVLAIGRMGK                | ITRAQ4plex@N-term;<br>Deamidated(R)@2;<br>Deamidated(R)@11;<br>ITRAQ4plex(K)@14                                           | missed R-A@2; missed R-M@11                             | 0.0088  | 1702.0255 | 568.3491 | 1702.0167 | 568.3462 | 3 | 37.55 |
| LIC11977 |      |      |                               |                                                                                                                           |                                                         |         |           |          |           |          |   |       |
|          | 5.79 | 5.3  | EFYGDAYIIRSGKVVN<br>Y         | Glu->pyro-Glu@N-term;<br>ITRAQ4plex(K)@13                                                                                 | cleaved Y-Q@C-term; missed R-S@10;<br>missed K-V@13     | 0.1150  | 2119.2009 | 707.4076 | 2119.0860 | 707.3693 | 3 | 42.51 |
|          | 5.79 | 5.3  | ESLMPDINLNK                   | Glu->pyro-Glu@N-term;<br>ITRAQ4plex(K)@12                                                                                 |                                                         | 0.0816  | 1455.8329 | 486.2849 | 1455.7513 | 486.2577 | 3 | 49.81 |
|          | 5.79 | 5.3  | FEGLNQDETGGQPIK<br>R          | ITRAQ4plex@N-term;<br>ITRAQ4plex(K)@15                                                                                    | missed K-R@15                                           | 0.0040  | 2076.0884 | 693.0367 | 2076.0844 | 693.0354 | 3 | 29.74 |
|          | 5.79 | 5.3  | GLDDVVDFK                     | ITRAQ4plex@N-term;<br>ITRAQ4plex(K)@9                                                                                     |                                                         | 0.0178  | 1294.7191 | 648.3668 | 1294.7013 | 648.3579 | 2 | 32.22 |
|          | 5.79 | 5.3  | ITIHATETVMDSFLR               | ITRAQ4plex@N-term;<br>ITRAQ4plex(S)@12;<br>Deamidated(R)@15                                                               |                                                         | 0.0845  | 2022.1545 | 675.0588 | 2022.0699 | 675.0306 | 3 | 35.02 |
|          | 5.79 | 5.3  | KIEVPGEVGFNIK                 | ITRAQ4plex@N-term;<br>ITRAQ4plex(K)@1;<br>ITRAQ4plex(K)@13                                                                | missed K-I@1                                            | -0.0079 | 1861.0961 | 621.3726 | 1861.1039 | 621.3752 | 3 | 34.59 |
|          | 5.79 | 5.3  | KSPLVFILPNK                   | ITRAQ4plex@N-term;<br>ITRAQ4plex(K)@1;<br>ITRAQ4plex(K)@11                                                                | missed K-S@1                                            | 0.0019  | 1687.0781 | 563.3666 | 1687.0762 | 563.3660 | 3 | 37.46 |
|          | 5.79 | 5.3  | LQNGDFLIQDGERKI               | ITRAQ4plex@N-term;<br>Oxidation(R)@13;<br>ITRAQ4plex(K)@14                                                                | cleaved I-E@C-term; missed R-K@13;<br>missed K-I@14     | 0.0040  | 2049.1138 | 684.0452 | 2049.1098 | 684.0439 | 3 | 34.55 |
|          | 5.79 | 5.3  | LVFILPNKFF                    | ITRAQ4plex@N-term;<br>ITRAQ4plex(K)@8                                                                                     | cleaved P-L@N-term; cleaved F-H@C-term;<br>missed K-F@8 | -0.0240 | 1524.9071 | 509.3097 | 1524.9312 | 509.3177 | 3 | 47.13 |
|          | 5.79 | 5.3  | VLDLPR                        | ITRAQ4plex@N-term                                                                                                         | cleaved L-V@N-term                                      | -0.0157 | 855.5143  | 428.7644 | 855.5300  | 428.7723 | 2 | 29.42 |

|              |       |      |                                |                                                                                                                        |                                                                 |         |           |           |           |           |   |       |
|--------------|-------|------|--------------------------------|------------------------------------------------------------------------------------------------------------------------|-----------------------------------------------------------------|---------|-----------|-----------|-----------|-----------|---|-------|
|              | 5.79  | 5.3  | YKRGDQIIR                      | ITRAQ4plex@N-term;<br>ITRAQ4plex(K)@2;<br>Oxidation(D)@5                                                               | missed K-R@2; missed R-G@3                                      | 0.0546  | 1451.8999 | 484.9739  | 1451.8452 | 484.9557  | 3 | 34.37 |
| LIC10411     |       |      |                                |                                                                                                                        |                                                                 |         |           |           |           |           |   |       |
|              | 17.3  | 66.2 | AVALGK                         | ITRAQ4plex@N-term;<br>ITRAQ4plex(K)@6                                                                                  | cleaved S-A@N-term                                              | 0.0107  | 845.5685  | 423.7915  | 845.5578  | 423.7862  | 2 | 30.74 |
|              | 17.3  | 66.2 | EAFEYADK                       | ITRAQ4plex@N-term;<br>ITRAQ4plex(K)@8                                                                                  |                                                                 | -0.0052 | 1259.6226 | 630.8185  | 1259.6278 | 630.8212  | 2 | 28.79 |
|              | 17.3  | 66.2 | IAEPGDSTIALK                   | ITRAQ4plex@N-term;<br>ITRAQ4plex(K)@12                                                                                 |                                                                 | -0.0737 | 1501.7859 | 751.9002  | 1501.8595 | 751.9370  | 2 | 29.48 |
|              | 17.3  | 66.2 | IATAAISLGLK                    | ITRAQ4plex@N-term;<br>ITRAQ4plex(K)@11                                                                                 |                                                                 | -1.0115 | 1301.7999 | 651.9072  | 1302.8115 | 652.4130  | 2 | 58.35 |
|              | 17.3  | 66.2 | IISSENGDIVYASLAL<br>LNITTK     | ITRAQ4plex@N-term;<br>Deamidated(N)@6;<br>ITRAQ4plex(K)@23                                                             |                                                                 | -0.0250 | 2710.4634 | 904.4951  | 2710.4884 | 904.5034  | 3 | 49.37 |
|              | 10.01 | 33.8 | LFAEK                          | ITRAQ4plex@N-term;<br>ITRAQ4plex(K)@5                                                                                  | cleaved A-L@N-term                                              | 0.0307  | 894.5726  | 448.2935  | 894.5418  | 448.2782  | 2 | 39.98 |
|              | 17.3  | 66.2 | RSDEFVADLLDLIK                 | ITRAQ4plex@N-term;<br>ITRAQ4plex(K)@14                                                                                 | missed R-S@1                                                    | 0.0018  | 1921.0782 | 641.3667  | 1921.0764 | 641.3661  | 3 | 54.82 |
|              | 17.3  | 66.2 | RSDEFVADLLDLIKK                | ITRAQ4plex@N-term;<br>Oxidation(D)@11;<br>ITRAQ4plex(K)@14;<br>ITRAQ4plex(K)@15                                        | missed R-S@1; missed K-K@14                                     | -0.0291 | 2209.2393 | 553.3171  | 2209.2684 | 553.3244  | 4 | 41.82 |
|              | 17.3  | 66.2 | SAIPELIQLLNR                   | No ITRAQ4plex@N-term                                                                                                   |                                                                 | -0.0093 | 1365.7887 | 683.9016  | 1365.7980 | 683.9063  | 2 | 38.81 |
|              | 17.3  | 66.2 | SAIPELIQLLNRNNEPK              | ITRAQ4plex@N-term;<br>Deamidated(N)@13;<br>ITRAQ4plex(K)@17                                                            | missed R-N@12                                                   | 0.0032  | 2237.2656 | 746.7625  | 2237.2623 | 746.7614  | 3 | 36.84 |
|              | 17.3  | 66.2 | SDEFVADLLDLIK                  | ITRAQ4plex@N-term;<br>ITRAQ4plex(K)@13                                                                                 |                                                                 | -0.9268 | 1764.0486 | 883.0316  | 1764.9753 | 883.4949  | 2 | 46.04 |
|              | 17.3  | 66.2 | SLSSGSDSEKYESAV<br>ALGK        | ITRAQ4plex@N-term;<br>ITRAQ4plex(K)@10;<br>ITRAQ4plex(K)@19                                                            | missed K-Y@10                                                   | -0.0240 | 2346.2039 | 783.0753  | 2346.2280 | 783.0833  | 3 | 30.32 |
| LIC10069     |       |      |                                |                                                                                                                        |                                                                 |         |           |           |           |           |   |       |
|              | 4     | 25.0 | FVLDVDDFTEAIAELE<br>ENK        | ITRAQ4plex@N-term;<br>ITRAQ4plex(K)@19                                                                                 | cleaved S-F@N-term                                              | 0.0150  | 2484.2666 | 829.0961  | 2484.2515 | 829.0911  | 3 | 41.12 |
|              | 4     | 25.0 | FYSDFDFESLDEK                  | ITRAQ4plex@N-term;<br>ITRAQ4plex(K)@14                                                                                 |                                                                 | 0.0137  | 2041.9901 | 681.6707  | 2041.9764 | 681.6661  | 3 | 37.05 |
|              | 4     | 25.0 | LGENK                          | ITRAQ4plex@N-term;<br>ITRAQ4plex(K)@5                                                                                  | cleaved S-L@N-term                                              | 0.0044  | 847.5051  | 424.7598  | 847.5007  | 424.7576  | 2 | 23.51 |
| LIC20272     |       |      |                                |                                                                                                                        |                                                                 |         |           |           |           |           |   |       |
|              | 2     | 3.3  | GSKNNSIVVSPRIAF<br>LGSQFNLSHFR | ITRAQ4plex@N-term;<br>ITRAQ4plex(K)@3;<br>Oxidation(N)@4;<br>Deamidated(N)@5;<br>Deamidated(Q)@20;<br>Deamidated(N)@22 | missed K-N@3; missed R-I@13                                     | -0.1170 | 3280.6279 | 821.1642  | 3280.7448 | 821.1935  | 4 | 40.66 |
|              | 2     | 3.3  | LARIHLRRMDLEK                  | ITRAQ4plex@N-term;<br>Deamidated(R)@3;<br>Deamidated(R)@7;<br>Deamidated(R)@8;<br>ITRAQ4plex(K)@13                     | cleaved F-L@N-term; missed R-I@3; missed<br>R-R@7; missed R-M@8 | 0.0021  | 1941.1095 | 648.0438  | 1941.1073 | 648.0431  | 3 | 41.77 |
|              | 2     | 3.3  | LGSQ                           | ITRAQ4plex@N-term                                                                                                      | cleaved F-L@N-term; cleaved Q-F@C-term                          | 0.0244  | 547.3333  | 548.3405  | 547.3088  | 548.3160  | 1 | 42.24 |
|              | 2     | 3.3  | TPETSTEPDKGK                   | ITRAQ4plex@N-term;<br>ITRAQ4plex(K)@10;<br>ITRAQ4plex(K)@12                                                            | missed K-G@10                                                   | -0.0253 | 1720.8956 | 574.6392  | 1720.9209 | 574.6476  | 3 | 26.02 |
| LIC20264     |       |      |                                |                                                                                                                        |                                                                 |         |           |           |           |           |   |       |
|              | 2     | 3.5  | GDLGVEVPIEELPILO<br>R          | ITRAQ4plex@N-term                                                                                                      |                                                                 | 0.0117  | 2020.1445 | 1011.0800 | 2020.1326 | 1011.0736 | 2 | 38.71 |
|              | 2     | 3.5  | IDFSKDPEK                      | ITRAQ4plex@N-term;<br>ITRAQ4plex(K)@5;<br>ITRAQ4plex(K)@9                                                              |                                                                 | 0.0020  | 1509.8424 | 755.9285  | 1509.8404 | 755.9275  | 2 | 48.13 |
|              | 2     | 3.5  | LGSRK                          | ITRAQ4plex@N-term;<br>ITRAQ4plex(K)@5                                                                                  | missed R-K@4                                                    | -0.0430 | 847.5053  | 424.7599  | 847.5483  | 424.7814  | 2 | 23.57 |
|              | 2     | 3.5  | TGDLQVDHLDLKI                  | ITRAQ4plex@N-term;<br>ITRAQ4plex(K)@12                                                                                 |                                                                 | -2.9659 | 1637.9319 | 546.9846  | 1640.8977 | 547.9732  | 3 | 31.24 |
|              | 2     | 3.5  | VEVP                           | ITRAQ4plex@N-term                                                                                                      | cleaved G-V@N-term; cleaved P-I@C-term                          | 0.0104  | 586.3553  | 587.3625  | 586.3448  | 587.3521  | 1 | 53.86 |
| LIC2_SPN3857 |       |      |                                |                                                                                                                        |                                                                 |         |           |           |           |           |   |       |
|              | 2     | 13.5 | LGMGFLOSLFK                    | ITRAQ4plex@N-term;<br>ITRAQ4plex(K)@12                                                                                 |                                                                 | 0.0039  | 1656.9192 | 829.4669  | 1656.9153 | 829.4649  | 2 | 53.62 |
| LIC20254     |       |      |                                |                                                                                                                        |                                                                 |         |           |           |           |           |   |       |
|              | 6     | 18.9 | AGIKPNVGASGEIIR                | ITRAQ4plex@N-term;<br>ITRAQ4plex(K)@4                                                                                  |                                                                 | -0.0197 | 1769.0205 | 590.6808  | 1769.0403 | 590.6874  | 3 | 30.01 |
|              | 6     | 18.9 | GALKIDPVRRR                    | ITRAQ4plex@N-term;<br>ITRAQ4plex(K)@4;<br>Oxidation(P)@7                                                               | missed K-I@4; missed R-R@9; missed R-<br>R@10                   | -0.0300 | 1583.9528 | 528.9915  | 1583.9827 | 529.0015  | 3 | 38.57 |

|          |       |      |                  |                                                                                                   |                                          |         |           |          |           |          |   |       |
|----------|-------|------|------------------|---------------------------------------------------------------------------------------------------|------------------------------------------|---------|-----------|----------|-----------|----------|---|-------|
|          | 6     | 18.9 | IDPVRRRVTLK      | ITRAQ4plex@N-term;<br>Oxidation(R)@5;<br>Deamidated(R)@6;<br>Deamidated(R)@7;<br>ITRAQ4plex(K)@11 | missed R-R@5; missed R-R@6; missed R-V@7 | -0.0036 | 1658.0046 | 553.6755 | 1658.0083 | 553.6767 | 3 | 36.68 |
|          | 6     | 18.9 | KEFDILQLMAASPGK  | ITRAQ4plex@N-term;<br>ITRAQ4plex(K)@1;<br>ITRAQ4plex(K)@15                                        |                                          | -0.0159 | 2079.1606 | 694.0608 | 2079.1764 | 694.0661 | 3 | 42.02 |
|          | 6     | 18.9 | PNVGASGEIIR      | ITRAQ4plex@N-term;<br>Oxidation(P)@1                                                              | cleaved K-P@N-term                       | -0.0158 | 1271.6797 | 424.9005 | 1271.6955 | 424.9058 | 3 | 30.62 |
|          | 6     | 18.9 | QLMA             | Gln->pyro-Glu@N-term                                                                              | cleaved L-Q@N-term; cleaved A-A@C-term   | 0.0360  | 444.2403  | 445.2475 | 444.2043  | 445.2115 | 1 | 16.49 |
|          | 6     | 18.9 | RVTLKDNIIVNISRK  | ITRAQ4plex@N-term;<br>Oxidation(R)@1;<br>ITRAQ4plex(K)@5;<br>ITRAQ4plex(K)@14                     | missed R-V@1; missed R-K@13              | -0.0294 | 2103.2559 | 702.0926 | 2103.2853 | 702.1024 | 3 | 39.64 |
|          | 6     | 18.9 | TILVIEDDPDIGNLIR | ITRAQ4plex@N-term                                                                                 |                                          | -0.0093 | 1939.0656 | 970.5400 | 1939.0748 | 970.5447 | 2 | 38.39 |
|          | 2.05  | 6.2  | VDVFFR           | ITRAQ4plex@N-term                                                                                 |                                          | 0.0082  | 925.5226  | 463.7686 | 925.5143  | 463.7644 | 2 | 44.57 |
| LIC20250 |       |      |                  |                                                                                                   |                                          |         |           |          |           |          |   |       |
|          | 8.19  | 12.5 | AGNGISK          | ITRAQ4plex@N-term;<br>ITRAQ4plex(K)@7                                                             | cleaved I-A@N-term                       | 0.0166  | 933.5654  | 467.7899 | 933.5487  | 467.7816 | 2 | 37.43 |
|          | 11.12 | 13.8 | DRFEIIPK         | ITRAQ4plex@N-term;<br>ITRAQ4plex(K)@8                                                             | missed R-F@2                             | -0.0056 | 1304.7640 | 435.9286 | 1304.7696 | 435.9305 | 3 | 32.78 |
|          | 11.12 | 13.8 | ENSINFSSATSHSK   | ITRAQ4plex@N-term;<br>Deamidated(N)@2;<br>ITRAQ4plex(K)@13                                        |                                          | 0.0002  | 1683.7947 | 562.2722 | 1683.7944 | 562.2721 | 3 | 25.90 |
|          | 11.12 | 13.8 | EQVVKTNSEIVSNK   | ITRAQ4plex@N-term;<br>Deamidated(Q)@2;<br>ITRAQ4plex(K)@5;<br>ITRAQ4plex(K)@15                    | cleaved L-E@N-term; missed K-T@5         | 0.1101  | 2094.2634 | 699.0951 | 2094.1534 | 699.0584 | 3 | 44.23 |
|          | 8.19  | 12.5 | GASVPIGDNSK      | ITRAQ4plex@N-term;<br>ITRAQ4plex(K)@11                                                            |                                          | -0.0011 | 1331.7278 | 666.8712 | 1331.7289 | 666.8717 | 2 | 35.28 |
|          | 11.12 | 13.8 | GASVPIGDNSKEEGK  | ITRAQ4plex@N-term;<br>ITRAQ4plex(K)@11;<br>ITRAQ4plex(K)@15                                       |                                          | -0.0148 | 1919.0178 | 640.6799 | 1919.0325 | 640.6848 | 3 | 27.73 |
|          | 11.12 | 13.8 | HTIEYIR          | ITRAQ4plex@N-term                                                                                 |                                          | 0.0078  | 1074.6022 | 538.3083 | 1074.5944 | 538.3045 | 2 | 50.92 |
|          | 11.12 | 13.8 | IAGNGISKDR       | ITRAQ4plex@N-term;<br>ITRAQ4plex(K)@8                                                             | cleaved Y-I@N-term                       | -0.0824 | 1317.6785 | 440.2334 | 1317.7608 | 440.2609 | 3 | 26.60 |
|          | 8.19  | 12.5 | IIPK             | No ITRAQ4plex@N-term;<br>ITRAQ4plex(K)@4                                                          | cleaved E-I@N-term                       | 0.0246  | 613.4531  | 614.4604 | 613.4285  | 614.4358 | 1 | 53.24 |
|          | 11.12 | 13.8 | IIPK             | No ITRAQ4plex@N-term                                                                              | cleaved T-L@C-term                       | -0.0050 | 442.2741  | 443.2814 | 442.2791  | 443.2864 | 1 | 56.93 |
|          | 8.19  | 12.5 | ISINDAK          | ITRAQ4plex@N-term;<br>ITRAQ4plex(K)@7                                                             |                                          | -0.0036 | 1047.6133 | 524.8139 | 1047.6168 | 524.8157 | 2 | 37.85 |
|          | 11.12 | 13.8 | KLIQLAEFTSGK     | ITRAQ4plex@N-term;<br>ITRAQ4plex(K)@1;<br>ITRAQ4plex(K)@13                                        | missed K-L@1                             | 0.0007  | 1895.1101 | 632.7106 | 1895.1093 | 632.7104 | 3 | 42.34 |
|          | 11.12 | 13.8 | LIQLAEFTSGK      | ITRAQ4plex@N-term;<br>ITRAQ4plex(K)@12                                                            |                                          | 0.0079  | 1622.9203 | 812.4674 | 1622.9123 | 812.4634 | 2 | 45.19 |
|          | 8.19  | 12.5 | LIQLAEFTSGKR     | ITRAQ4plex@N-term;<br>ITRAQ4plex(K)@12                                                            | missed K-R@12                            | 0.0000  | 1779.0135 | 594.0118 | 1779.0134 | 594.0117 | 3 | 53.67 |
|          | 8.19  | 12.5 | LVDDS            | ITRAQ4plex@N-term                                                                                 | cleaved I-L@N-term; cleaved S-E@C-term   | 0.0281  | 691.3791  | 692.3864 | 691.3510  | 692.3583 | 1 | 43.96 |
|          | 11.12 | 13.8 | NALTILKPGTGK     | ITRAQ4plex@N-term;<br>ITRAQ4plex(K)@7;<br>ITRAQ4plex(K)@12                                        |                                          | -0.0050 | 1715.0621 | 572.6946 | 1715.0671 | 572.6963 | 3 | 31.27 |
|          | 11.12 | 13.8 | NYIAGNGISKDR     | ITRAQ4plex@N-term;<br>Deamidated(N)@1;<br>ITRAQ4plex(K)@10                                        |                                          | 0.0249  | 1595.8760 | 798.9453 | 1595.8511 | 798.9328 | 2 | 42.89 |
|          | 11.12 | 13.8 | QSDVSIK          | Gln->pyro-Glu@N-term;<br>ITRAQ4plex(K)@8                                                          |                                          | -0.0042 | 1031.5215 | 516.7680 | 1031.5257 | 516.7701 | 2 | 35.92 |
|          | 11.12 | 13.8 | VIGHTSLEGSEDANQK | ITRAQ4plex@N-term;<br>ITRAQ4plex(K)@16                                                            |                                          | -0.0544 | 1971.9562 | 658.3260 | 1972.0105 | 658.3441 | 3 | 27.82 |
| LIC20249 |       |      |                  |                                                                                                   |                                          |         |           |          |           |          |   |       |
|          | 16.64 | 13.2 | AEYTVTPGSEMIR    | ITRAQ4plex@N-term                                                                                 |                                          | -0.0024 | 1596.7915 | 799.4030 | 1596.7939 | 799.4042 | 2 | 29.72 |
|          | 16.64 | 13.2 | ARIHETNLK        | ITRAQ4plex@N-term;<br>Deamidated(R)@2;<br>Deamidated(N)@7;<br>ITRAQ4plex(K)@9                     | cleaved F-A@N-term; missed R-I@2         | 0.0293  | 1370.8055 | 457.9424 | 1370.7761 | 457.9327 | 3 | 31.67 |
|          | 16.64 | 13.2 | EYVANPSQY        | ITRAQ4plex@N-term                                                                                 | cleaved Y-F@C-term                       | 0.0703  | 1213.6440 | 405.5553 | 1213.5737 | 405.5318 | 3 | 26.69 |
|          | 16.64 | 13.2 | GATTSVFGYDR      | ITRAQ4plex@N-term;<br>Oxidation(Y)@9                                                              | cleaved I-G@N-term                       | 0.1026  | 1332.7458 | 445.2559 | 1332.6432 | 445.2217 | 3 | 27.83 |
|          | 16.64 | 13.2 | IGVLVTK          | ITRAQ4plex@N-term;<br>ITRAQ4plex(K)@7                                                             |                                          | -2.0342 | 1014.6495 | 508.3320 | 1016.6838 | 509.3492 | 2 | 29.37 |
|          | 16.64 | 13.2 | ILYSHLWEGEPK     | ITRAQ4plex@N-term;<br>ITRAQ4plex(K)@12                                                            |                                          | -0.0028 | 1758.9521 | 587.3246 | 1758.9548 | 587.3256 | 3 | 33.10 |
|          | 16.64 | 13.2 | LDFNPTDSLK       | ITRAQ4plex@N-term;<br>ITRAQ4plex(K)@11                                                            |                                          | -0.0063 | 1549.8533 | 775.9339 | 1549.8595 | 775.9370 | 2 | 34.42 |

|          |       |      |                             |                                                                               |                                        |         |           |          |           |          |   |       |
|----------|-------|------|-----------------------------|-------------------------------------------------------------------------------|----------------------------------------|---------|-----------|----------|-----------|----------|---|-------|
|          | 16.64 | 13.2 | LQLLSPFIPWEK                | ITRAQ4plex@N-term;<br>ITRAQ4plex(K)@12                                        |                                        | -0.0041 | 1758.0283 | 880.0214 | 1758.0324 | 880.0235 | 2 | 38.10 |
|          | 6.43  | 3.7  | LSGWASAK                    | ITRAQ4plex@N-term;<br>ITRAQ4plex(K)@8                                         |                                        | -0.0043 | 1106.6285 | 554.3215 | 1106.6328 | 554.3237 | 2 | 40.81 |
|          | 16.64 | 13.2 | NQLSGAYEPVPQTAR             | ITRAQ4plex@N-term                                                             |                                        | -0.0078 | 1773.9054 | 887.9600 | 1773.9131 | 887.9638 | 2 | 28.72 |
|          | 16.64 | 13.2 | NSIITSFNR                   | No ITRAQ4plex@N-term                                                          |                                        | 0.0117  | 1050.5575 | 526.2860 | 1050.5458 | 526.2802 | 2 | 30.08 |
|          | 16.64 | 13.2 | NVVGRPLTLTEK                | ITRAQ4plex@N-term;<br>ITRAQ4plex(K)@12                                        |                                        | -0.0082 | 1613.9626 | 538.9948 | 1613.9708 | 538.9976 | 3 | 30.67 |
|          | 16.64 | 13.2 | PLTLTEK                     | ITRAQ4plex@N-term;<br>ITRAQ4plex(K)@7                                         | cleaved R-P@N-term                     | -0.0009 | 1088.6676 | 545.3411 | 1088.6685 | 545.3415 | 2 | 29.67 |
|          | 16.64 | 13.2 | SGWASAK                     | ITRAQ4plex@N-term;<br>ITRAQ4plex(K)@7                                         | cleaved L-S@N-term                     | 0.0024  | 993.5511  | 497.7828 | 993.5487  | 497.7816 | 2 | 26.55 |
|          | 16.64 | 13.2 | SYVDFAPDR                   | ITRAQ4plex@N-term                                                             |                                        | 0.0027  | 1212.5924 | 607.3035 | 1212.5897 | 607.3021 | 2 | 29.63 |
|          | 16.64 | 13.2 | TANTVNK                     | ITRAQ4plex@N-term;<br>Dehydrated(T)@4;<br>Deamidated(N)@6;<br>ITRAQ4plex(K)@7 |                                        | 0.0113  | 1017.5812 | 509.7979 | 1017.5698 | 509.7922 | 2 | 29.90 |
|          | 16.64 | 13.2 | TPGS                        | ITRAQ4plex@N-term                                                             | cleaved V-T@N-term; cleaved S-E@C-term | 0.0336  | 504.3002  | 505.3075 | 504.2666  | 505.2738 | 1 | 56.17 |
|          | 16.64 | 13.2 | VAGILTVK                    | ITRAQ4plex@N-term;<br>ITRAQ4plex(K)@8                                         |                                        | 0.0049  | 1087.7258 | 544.8702 | 1087.7209 | 544.8677 | 2 | 39.19 |
|          | 16.64 | 13.2 | VAMQDATAQMAL                | ITRAQ4plex@N-term                                                             | cleaved L-L@C-term                     | 0.1203  | 1392.8066 | 697.4106 | 1392.6863 | 697.3504 | 2 | 48.36 |
|          | 6.43  | 3.7  | VAMQDATAQMALLQF<br>MSAGR    | ITRAQ4plex@N-term;<br>Oxidation(M)@3                                          |                                        | -0.0693 | 2299.0552 | 575.7711 | 2299.1245 | 575.7884 | 4 | 53.48 |
|          | 16.64 | 13.2 | VAVPSTVHCDHLIQAK            | ITRAQ4plex@N-term;<br>Methylthio(C)@9;<br>ITRAQ4plex(K)@16                    |                                        | -0.0142 | 2051.0759 | 684.6992 | 2051.0900 | 684.7039 | 3 | 36.72 |
|          | 6.43  | 3.7  | VTVAVDPK                    | ITRAQ4plex@N-term;<br>ITRAQ4plex(K)@8                                         |                                        | 0.0077  | 1115.6871 | 558.8508 | 1115.6794 | 558.8470 | 2 | 37.47 |
| LIC20216 |       |      |                             |                                                                               |                                        |         |           |          |           |          |   |       |
|          | 8     | 29.9 | FSQFSAEHYEVGHEA<br>LSELQEGK | ITRAQ4plex@N-term;<br>ITRAQ4plex(K)@23                                        |                                        | 0.0049  | 2909.4126 | 728.3604 | 2909.4075 | 728.3592 | 4 | 34.28 |
|          | 8     | 29.9 | IELNHLPLNLT                 | ITRAQ4plex@N-term                                                             | cleaved L-G@C-term                     | 0.1028  | 1662.0503 | 555.0240 | 1661.9474 | 554.9897 | 3 | 33.92 |
|          | 4     | 13.2 | ILIFR                       | ITRAQ4plex@N-term                                                             |                                        | 0.0158  | 804.5502  | 403.2823 | 804.5343  | 403.2744 | 2 | 45.36 |
|          | 8     | 29.9 | IYAK                        | No ITRAQ4plex@N-term;<br>ITRAQ4plex(K)@4                                      | cleaved N-I@N-term                     | -0.0048 | 637.3873  | 638.3946 | 637.3921  | 638.3994 | 1 | 56.42 |
|          | 8     | 29.9 | NTEAILPVLTSER               | ITRAQ4plex@N-term                                                             |                                        | -0.0023 | 1698.9615 | 850.4880 | 1698.9638 | 850.4892 | 2 | 34.69 |
|          | 8     | 29.9 | SIASEHNGIYAK                | ITRAQ4plex@N-term;<br>ITRAQ4plex(K)@13                                        |                                        | -0.0048 | 1690.8834 | 564.6351 | 1690.8882 | 564.6367 | 3 | 27.96 |
|          | 8     | 29.9 | VIQANLEISK                  | ITRAQ4plex@N-term;<br>ITRAQ4plex(K)@11                                        |                                        | -0.0240 | 1514.9036 | 758.4590 | 1514.9276 | 758.4711 | 2 | 47.65 |
| LIC20205 |       |      |                             |                                                                               |                                        |         |           |          |           |          |   |       |
|          | 14.85 | 26.6 | AAAPKQSATTVTAK              | Formyl@N-term;<br>ITRAQ4plex(K)@5;<br>ITRAQ4plex(K)@14                        | missed K-Q@5                           | 0.0251  | 1659.9650 | 554.3289 | 1659.9399 | 554.3206 | 3 | 26.09 |
|          | 14.85 | 26.6 | AEEVDDHIK                   | ITRAQ4plex@N-term;<br>ITRAQ4plex(K)@9                                         | cleaved L-A@N-term                     | -0.0076 | 1342.6897 | 448.5705 | 1342.6972 | 448.5730 | 3 | 27.87 |
|          | 14.85 | 26.6 | DAHEALELAIR                 | ITRAQ4plex@N-term                                                             |                                        | 0.0131  | 1380.7614 | 691.3879 | 1380.7483 | 691.3814 | 2 | 47.03 |
|          | 14.85 | 26.6 | EAENAVSFYEK                 | ITRAQ4plex@N-term;<br>ITRAQ4plex(K)@11                                        |                                        | -0.0033 | 1573.7836 | 787.8990 | 1573.7868 | 787.9007 | 2 | 29.43 |
|          | 14.85 | 26.6 | ETTFLEAVAAAIQHEK            | ITRAQ4plex@N-term;<br>ITRAQ4plex(K)@16                                        |                                        | -0.0073 | 2045.0966 | 682.7061 | 2045.1037 | 682.7085 | 3 | 38.59 |
|          | 7.8   | 12.8 | FHDSTLQK                    | No ITRAQ4plex@N-term;<br>ITRAQ4plex(K)@8                                      |                                        | 0.0126  | 1118.5968 | 560.3057 | 1118.5842 | 560.2994 | 2 | 36.53 |
|          | 14.85 | 26.6 | FITELYEQAESELPN<br>LK       | ITRAQ4plex@N-term;<br>ITRAQ4plex(K)@18                                        |                                        | -0.0041 | 2368.2366 | 790.4194 | 2368.2406 | 790.4208 | 3 | 36.08 |
|          | 14.85 | 26.6 | KPSSATTSTPK                 | ITRAQ4plex@N-term;<br>ITRAQ4plex(K)@1;<br>ITRAQ4plex(K)@11                    |                                        | -0.0496 | 1535.8389 | 512.9536 | 1535.8884 | 512.9701 | 3 | 26.29 |
|          | 14.85 | 26.6 | LAEEVDDHIK                  | ITRAQ4plex@N-term;<br>ITRAQ4plex(K)@10                                        |                                        | 0.0347  | 1455.8160 | 486.2793 | 1455.7813 | 486.2677 | 3 | 46.68 |
|          | 14.85 | 26.6 | LANKFEDVNIK                 | ITRAQ4plex@N-term;<br>ITRAQ4plex(K)@4;<br>ITRAQ4plex(K)@11                    | missed K-F@4                           | -0.0296 | 1721.9745 | 574.9988 | 1722.0041 | 575.0087 | 3 | 45.49 |
|          | 14.85 | 26.6 | LPPGDTK                     | ITRAQ4plex@N-term;<br>ITRAQ4plex(K)@7                                         |                                        | 0.0043  | 1014.5997 | 508.3071 | 1014.5953 | 508.3049 | 2 | 25.34 |
|          | 7.8   | 12.8 | QLAAIHK                     | Gln->pyro-Glu@N-term;<br>ITRAQ4plex(K)@7                                      |                                        | -0.0051 | 906.5358  | 454.2752 | 906.5409  | 454.2777 | 2 | 38.67 |
|          | 14.85 | 26.6 | QSATTVTAKK                  | Gln->pyro-Glu@N-term;<br>Methyl(T)@7; ITRAQ4plex(K)@9;<br>ITRAQ4plex(K)@10    | missed K-K@9                           | -0.0040 | 1318.7660 | 660.3903 | 1318.7700 | 660.3923 | 2 | 26.36 |
| LIC20204 |       |      |                             |                                                                               |                                        |         |           |          |           |          |   |       |
|          | 2     | 5.5  | GVVIGFIPMASTPDQF<br>LENLK   | ITRAQ4plex@N-term;<br>ITRAQ4plex(K)@21                                        |                                        | 0.0151  | 2563.4116 | 855.4778 | 2563.3964 | 855.4727 | 3 | 39.13 |



|              |       |      |                                           |                                                                                                      |                                                               |         |           |          |           |          |   |       |
|--------------|-------|------|-------------------------------------------|------------------------------------------------------------------------------------------------------|---------------------------------------------------------------|---------|-----------|----------|-----------|----------|---|-------|
|              | 2     | 5.5  | SGADR                                     | ITRAQ4plex@N-term;<br>Oxidation(R)@5                                                                 |                                                               | 0.0825  | 664.4087  | 665.4160 | 664.3262  | 665.3335 | 1 | 58.04 |
| LIC20198     |       |      |                                           |                                                                                                      |                                                               |         |           |          |           |          |   |       |
|              | 2     | 2.2  | AVIQ                                      | No ITRAQ4plex@N-term                                                                                 | cleaved D-A@N-term; cleaved P-Q@C-term                        | -0.0389 | 429.2198  | 430.2271 | 429.2587  | 430.2660 | 1 | 22.77 |
|              | 2     | 2.2  | DIPHQDLNR                                 | ITRAQ4plex@N-term                                                                                    |                                                               | -0.0037 | 1365.6721 | 456.2313 | 1365.6759 | 456.2326 | 3 | 26.82 |
|              | 2     | 2.2  | EISIKSGSMNFDFGIAR                         | No ITRAQ4plex@N-term;<br>ITRAQ4plex(K)@5;<br>Oxidation(M)@9;<br>Deamidated(N)@10                     | missed K-S@5                                                  | 0.0458  | 2032.0515 | 678.3578 | 2032.0057 | 678.3425 | 3 | 35.67 |
| LIC20197     |       |      |                                           |                                                                                                      |                                                               |         |           |          |           |          |   |       |
|              | 2.2   | 1.6  | ETNPYGISHR                                | Glu->pyro-Glu@N-term;<br>Oxidation(H)@9                                                              |                                                               | -0.0045 | 1170.5374 | 586.2759 | 1170.5418 | 586.2782 | 2 | 28.51 |
|              | 2.2   | 1.6  | IILLL                                     | ITRAQ4plex@N-term                                                                                    | cleaved I-I@N-term; cleaved L-N@C-term                        | 0.0124  | 727.5453  | 728.5526 | 727.5329  | 728.5402 | 1 | 55.80 |
|              | 2.2   | 1.6  | LLLNFTSIFAQP                              | No ITRAQ4plex@N-term                                                                                 | cleaved I-L@N-term; cleaved P-S@C-term                        | 0.0139  | 1490.8273 | 746.4209 | 1490.8133 | 746.4139 | 2 | 42.58 |
|              | 2.2   | 1.6  | TEELKPPPK                                 | ITRAQ4plex@N-term;<br>ITRAQ4plex(K)@5;<br>ITRAQ4plex(K)@9                                            |                                                               | -0.0195 | 1469.8624 | 490.9614 | 1469.8819 | 490.9679 | 3 | 27.93 |
|              | 2.2   | 1.6  | TGEPDAASGFTSQPK                           | ITRAQ4plex@N-term;<br>Phospho(S)@9;<br>Deamidated(Q)@14;<br>ITRAQ4plex(K)@16                         |                                                               | 0.0450  | 1947.9156 | 650.3125 | 1947.8707 | 650.2975 | 3 | 21.80 |
|              | 2.2   | 1.6  | TRPSQAAIEAASK                             | ITRAQ4plex@N-term;<br>ITRAQ4plex(K)@13                                                               |                                                               | -0.0285 | 1616.8804 | 539.9674 | 1616.9090 | 539.9769 | 3 | 28.27 |
|              | 2.2   | 1.6  | VKTDMNEVK                                 | ITRAQ4plex@N-term;<br>ITRAQ4plex(K)@2;<br>ITRAQ4plex(K)@10                                           | missed K-T@2                                                  | -0.1122 | 1595.7797 | 798.8971 | 1595.8918 | 798.9532 | 2 | 56.90 |
| LIC20196     |       |      |                                           |                                                                                                      |                                                               |         |           |          |           |          |   |       |
|              | 2     | 6.4  | AIENEIVEVVR                               | ITRAQ4plex@N-term                                                                                    |                                                               | -0.0021 | 1413.7928 | 707.9037 | 1413.7949 | 707.9047 | 2 | 32.84 |
| LIC20191     |       |      |                                           |                                                                                                      |                                                               |         |           |          |           |          |   |       |
|              | 2.01  | 1.7  | FHIFIESDPSK                               | No ITRAQ4plex@N-term;<br>ITRAQ4plex(K)@11                                                            |                                                               | 0.0544  | 1462.8121 | 488.6113 | 1462.7578 | 488.5932 | 3 | 38.67 |
|              | 2.01  | 1.7  | GILDYGITVYPSKKSLS<br>REQDRTK              | ITRAQ4plex@N-term;<br>ITRAQ4plex(Y)@5;<br>ITRAQ4plex(K)@13;<br>ITRAQ4plex(K)@14;<br>ITRAQ4plex(K)@24 | missed K-K@13; missed K-S@14; missed R<br>E@18; missed R-T@22 | -0.1418 | 3473.8398 | 869.4672 | 3473.9815 | 869.5027 | 4 | 62.86 |
|              | 2.01  | 1.7  | IDPHQDVWSR                                | ITRAQ4plex@N-term                                                                                    | cleaved F-I@N-term                                            | 0.0530  | 1395.7548 | 698.8846 | 1395.7017 | 698.8581 | 2 | 59.59 |
|              | 2.01  | 1.7  | IDSVLK                                    | ITRAQ4plex@N-term;<br>ITRAQ4plex(K)@6                                                                | cleaved Y-I@N-term                                            | 0.0256  | 961.6308  | 481.8227 | 961.6052  | 481.8099 | 2 | 37.03 |
|              | 2.01  | 1.7  | TVYPSKKSLSR                               | ITRAQ4plex@N-term;<br>ITRAQ4plex(K)@6;<br>ITRAQ4plex(K)@7                                            | cleaved I-T@N-term; missed K-K@6;<br>missed K-S@7             | -0.2109 | 1696.8092 | 566.6104 | 1697.0201 | 566.6807 | 3 | 33.57 |
|              | 2.01  | 1.7  | YLPWFGVHVFK                               | ITRAQ4plex@N-term;<br>ITRAQ4plex(K)@11                                                               |                                                               | 0.0114  | 1679.9546 | 560.9921 | 1679.9432 | 560.9883 | 3 | 38.79 |
| LIC2_SPN3853 |       |      |                                           |                                                                                                      |                                                               |         |           |          |           |          |   |       |
|              | 6.29  | 54.8 | ATLVPVLQK                                 | ITRAQ4plex@N-term;<br>ITRAQ4plex(K)@9                                                                |                                                               | -0.0653 | 1255.7455 | 628.8800 | 1255.8107 | 628.9126 | 2 | 30.36 |
|              | 6.29  | 54.8 | FDLTCLK                                   | ITRAQ4plex@N-term;<br>Methylthio(C)@5;<br>ITRAQ4plex(K)@7                                            |                                                               | 0.0026  | 1172.6204 | 587.3174 | 1172.6177 | 587.3161 | 2 | 41.09 |
|              | 6.29  | 54.8 | HSAEECAPIVDEMLTN<br>LTAGQKPEDAANIATM<br>K | ITRAQ4plex@N-term;<br>Methylthio(C)@6;<br>ITRAQ4plex(K)@22;<br>ITRAQ4plex(K)@33                      |                                                               | -0.0165 | 3975.9250 | 994.9885 | 3975.9416 | 994.9927 | 4 | 48.25 |
|              | 4.56  | 19.4 | PAIQACK                                   | No ITRAQ4plex@N-term;<br>Methylthio(C)@6;<br>ITRAQ4plex(K)@7                                         | cleaved I-P@N-term                                            | -0.0073 | 919.4669  | 460.7407 | 919.4741  | 460.7443 | 2 | 45.14 |
|              | 6.29  | 54.8 | SIPAIQACK                                 | ITRAQ4plex@N-term;<br>Methylthio(C)@8;<br>ITRAQ4plex(K)@9                                            |                                                               | -0.0695 | 1263.6228 | 632.8187 | 1263.6923 | 632.8534 | 2 | 30.84 |
| LIC20185     |       |      |                                           |                                                                                                      |                                                               |         |           |          |           |          |   |       |
|              | 12.95 | 32.6 | AIVSQEILNGDVLTPG                          | ITRAQ4plex@N-term                                                                                    | cleaved P-K@C-term                                            | -0.0437 | 1882.0096 | 628.3438 | 1882.0533 | 628.3584 | 3 | 36.84 |
|              | 12.95 | 32.6 | AIVSQEILNGDVLTPG<br>K                     | ITRAQ4plex@N-term;<br>Deamidated(N)@9;<br>ITRAQ4plex(K)@18                                           |                                                               | -0.0324 | 2155.2021 | 719.4080 | 2155.2344 | 719.4187 | 3 | 59.05 |
|              | 12.95 | 32.6 | GSSWILTNK                                 | ITRAQ4plex@N-term;<br>ITRAQ4plex(K)@9                                                                |                                                               | -0.0003 | 1292.7329 | 647.3737 | 1292.7332 | 647.3739 | 2 | 30.97 |
|              | 12.95 | 32.6 | IAFLK                                     | ITRAQ4plex@N-term;<br>ITRAQ4plex(K)@5                                                                |                                                               | 0.0209  | 878.6042  | 440.3094 | 878.5833  | 440.2989 | 2 | 38.35 |
|              | 12.95 | 32.6 | KINDADYLSVAK                              | ITRAQ4plex@N-term;<br>ITRAQ4plex(K)@1;<br>ITRAQ4plex(K)@12                                           | missed K-I@1                                                  | -0.0344 | 1767.9752 | 590.3323 | 1768.0096 | 590.3438 | 3 | 32.32 |

|          |       |      |                                     |                                                                                                                                                                                        |                                                          |         |           |          |           |          |   |       |
|----------|-------|------|-------------------------------------|----------------------------------------------------------------------------------------------------------------------------------------------------------------------------------------|----------------------------------------------------------|---------|-----------|----------|-----------|----------|---|-------|
|          | 12.95 | 32.6 | KLESIE                              | ITRAQ4plex@N-term;<br>ITRAQ4plex(K)@1                                                                                                                                                  | missed K-L@1                                             | 0.0024  | 1005.5974 | 503.8060 | 1005.5950 | 503.8048 | 2 | 28.55 |
|          | 12.95 | 32.6 | MKRISILFVVLVGLVLSF<br>HCKENKSDQTKGR | ITRAQ4plex@N-term;<br>Oxidation(M)@1;<br>ITRAQ4plex(K)@2;<br>Methylthio(C)@20;<br>ITRAQ4plex(K)@21;<br>Deamidated(N)@23;<br>ITRAQ4plex(K)@24;<br>Deamidated(Q)@27;<br>ITRAQ4plex(K)@29 | missed K-R@2; missed R-I@3; missed K-S@24; missed K-G@29 | 0.1945  | 4343.6450 | 869.7363 | 4343.4504 | 869.6974 | 5 | 57.60 |
|          | 12.95 | 32.6 | MNLHTPTTTAGVR                       | ITRAQ4plex@N-term                                                                                                                                                                      |                                                          | 0.0004  | 1541.8110 | 514.9443 | 1541.8106 | 514.9441 | 3 | 29.39 |
|          | 12.95 | 32.6 | MTPEQFQIYELAK                       | ITRAQ4plex@N-term;<br>ITRAQ4plex(K)@14                                                                                                                                                 |                                                          | 0.0049  | 1998.0789 | 667.0336 | 1998.0740 | 667.0319 | 3 | 36.59 |
|          | 12.95 | 32.6 | NLHTPTTTAGVR                        | ITRAQ4plex@N-term                                                                                                                                                                      | cleaved M-N@N-term                                       | -0.0028 | 1410.7672 | 471.2630 | 1410.7701 | 471.2640 | 3 | 27.01 |
|          | 12.95 | 32.6 | TIYITPSDLQK                         | ITRAQ4plex@N-term;<br>ITRAQ4plex(K)@11                                                                                                                                                 |                                                          | -0.0013 | 1565.8896 | 783.9521 | 1565.8908 | 783.9527 | 2 | 30.73 |
| LIC20175 |       |      |                                     |                                                                                                                                                                                        |                                                          |         |           |          |           |          |   |       |
|          | 2     | 8.0  | KIPIARLK                            | ITRAQ4plex@N-term;<br>ITRAQ4plex(K)@1;<br>Oxidation(P)@3;<br>ITRAQ4plex(K)@8                                                                                                           | missed K-I@1; missed R-L@6                               | -0.0753 | 1385.8695 | 462.9638 | 1385.9448 | 462.9889 | 3 | 32.67 |
|          | 2     | 8.0  | VLQEISELLHEK                        | ITRAQ4plex@N-term;<br>ITRAQ4plex(K)@12                                                                                                                                                 |                                                          | 0.0018  | 1724.9934 | 576.0051 | 1724.9916 | 576.0045 | 3 | 39.99 |
| LIC20165 |       |      |                                     |                                                                                                                                                                                        |                                                          |         |           |          |           |          |   |       |
|          | 2     | 2.8  | IAFIK                               | ITRAQ4plex@N-term;<br>ITRAQ4plex(K)@5                                                                                                                                                  | cleaved Y-I@N-term                                       | 0.0221  | 878.6055  | 440.3100 | 878.5833  | 440.2989 | 2 | 43.53 |
|          | 2     | 2.8  | IIAN                                | No ITRAQ4plex@N-term                                                                                                                                                                   | cleaved C-I@N-term; cleaved N-H@C-term                   | 0.0770  | 429.3357  | 430.3430 | 429.2587  | 430.2660 | 1 | 58.43 |
|          | 2     | 2.8  | LAILK                               | ITRAQ4plex@N-term;<br>ITRAQ4plex(K)@5                                                                                                                                                  | cleaved D-L@N-term                                       | 0.0125  | 844.6115  | 423.3130 | 844.5990  | 423.3068 | 2 | 42.63 |
|          | 2     | 2.8  | LILSPS                              | No ITRAQ4plex@N-term                                                                                                                                                                   | cleaved D-L@N-term; cleaved S-K@C-term                   | 0.0244  | 628.4039  | 629.4112 | 628.3796  | 629.3869 | 1 | 54.81 |
|          | 2     | 2.8  | TNPANGQPIPK                         | ITRAQ4plex@N-term;<br>Deamidated(N)@5;<br>ITRAQ4plex(K)@11                                                                                                                             |                                                          | -0.0068 | 1424.7800 | 713.3973 | 1424.7867 | 713.4006 | 2 | 34.59 |
| LIC20143 |       |      |                                     |                                                                                                                                                                                        |                                                          |         |           |          |           |          |   |       |
|          | 2     | 2.4  | DARVDFEIVDNK                        | ITRAQ4plex@N-term;<br>Oxidation(D)@11;<br>ITRAQ4plex(K)@13                                                                                                                             | missed R-V@3                                             | 0.0724  | 1823.0392 | 608.6870 | 1822.9669 | 608.6629 | 3 | 45.53 |
|          | 2     | 2.4  | FLDIQVPLILNR                        | ITRAQ4plex@N-term                                                                                                                                                                      |                                                          | -0.0012 | 1583.9509 | 792.9827 | 1583.9521 | 792.9833 | 2 | 37.41 |
|          | 2     | 2.4  | IWVK                                | ITRAQ4plex@N-term;<br>ITRAQ4plex(K)@4                                                                                                                                                  |                                                          | -0.0115 | 847.5045  | 424.7595 | 847.5160  | 424.7653 | 2 | 23.41 |
|          | 2     | 2.4  | VGELK                               | ITRAQ4plex@N-term;<br>ITRAQ4plex(K)@5                                                                                                                                                  | cleaved P-V@N-term                                       | 0.0235  | 832.5497  | 417.2821 | 832.5262  | 417.2704 | 2 | 36.00 |
|          | 2     | 2.4  | VYSQAVNPFTPWTTD<br>AVRAGSGTGFLIGNK  | ITRAQ4plex@N-term;<br>Oxidation(R)@18;<br>Oxidation(N)@29;<br>ITRAQ4plex(K)@30                                                                                                         | missed R-A@18                                            | 0.1107  | 3473.8931 | 869.4805 | 3473.7823 | 869.4529 | 4 | 60.41 |
| LIC20118 |       |      |                                     |                                                                                                                                                                                        |                                                          |         |           |          |           |          |   |       |
|          | 3     | 9.7  | AFPPDAK                             | ITRAQ4plex@N-term;<br>Oxidation(P)@3;<br>ITRAQ4plex(K)@6                                                                                                                               |                                                          | 0.0078  | 951.5348  | 476.7747 | 951.5269  | 476.7707 | 2 | 24.42 |
|          | 3     | 9.7  | DLEIHPDSSK                          | ITRAQ4plex@N-term;<br>ITRAQ4plex(K)@11                                                                                                                                                 |                                                          | -0.0064 | 1540.8278 | 514.6165 | 1540.8341 | 514.6186 | 3 | 30.68 |
|          | 3     | 9.7  | KLDNFIVVEK                          | ITRAQ4plex@N-term;<br>ITRAQ4plex(K)@1;<br>ITRAQ4plex(K)@10                                                                                                                             | missed K-L@1                                             | -0.0489 | 1635.9435 | 546.3218 | 1635.9925 | 546.3381 | 3 | 35.13 |
|          | 3     | 9.7  | LMSWFKMGEILK                        | ITRAQ4plex@N-term;<br>ITRAQ4plex(K)@6;<br>ITRAQ4plex(K)@12                                                                                                                             | cleaved I-L@N-term; missed K-M@6                         | 0.0981  | 1914.1818 | 639.0679 | 1914.0837 | 639.0352 | 3 | 41.57 |
|          | 3     | 9.7  | NGGN                                | ITRAQ4plex@N-term                                                                                                                                                                      | cleaved N-S@C-term                                       | 0.0588  | 504.3002  | 505.3075 | 504.2414  | 505.2487 | 1 | 56.17 |
| LIC20113 |       |      |                                     |                                                                                                                                                                                        |                                                          |         |           |          |           |          |   |       |
|          | 4     | 15.8 | GFEDHNGVER                          | ITRAQ4plex@N-term;<br>Deamidated(N)@6                                                                                                                                                  |                                                          | -0.0015 | 1303.5900 | 435.5373 | 1303.5915 | 435.5378 | 3 | 25.73 |
|          | 4     | 15.8 | GILFSLCLFLGMMTTFTI<br>YSHK          | No ITRAQ4plex@N-term;<br>Methylthio(C)@7;<br>Oxidation(M)@12;<br>ITRAQ4plex(K)@23                                                                                                      |                                                          | 0.0366  | 2823.5266 | 706.8889 | 2823.4899 | 706.8798 | 4 | 37.55 |
|          | 4     | 15.8 | KGDFEQELADLLNQVI<br>ETR             | ITRAQ4plex@N-term;<br>ITRAQ4plex(K)@1                                                                                                                                                  | missed K-G@1                                             | -0.0167 | 2505.3152 | 836.1123 | 2505.3319 | 836.1179 | 3 | 57.45 |
|          | 4     | 15.8 | KLAAGEEPAR                          | ITRAQ4plex@N-term;<br>ITRAQ4plex(K)@1;<br>Oxidation(P)@8                                                                                                                               | missed K-L@1                                             | -0.0170 | 1344.7435 | 673.3790 | 1344.7605 | 673.3875 | 2 | 48.69 |
|          | 4     | 15.8 | MAGPIYNIK                           | ITRAQ4plex@N-term;<br>HexNAc(N)@7;<br>ITRAQ4plex(K)@9                                                                                                                                  |                                                          | 0.0040  | 1496.8192 | 499.9470 | 1496.8152 | 499.9457 | 3 | 58.92 |

|          |      |      |                                |                                                                                                                            |                                                |         |           |           |           |           |   |       |
|----------|------|------|--------------------------------|----------------------------------------------------------------------------------------------------------------------------|------------------------------------------------|---------|-----------|-----------|-----------|-----------|---|-------|
|          | 4    | 15.8 | YNIK                           | No iTRAQ4plex@N-term; Deamidated(N)@2; iTRAQ4plex(K)@4                                                                     | cleaved I-Y@N-term                             | 0.0320  | 681.4139  | 682.4212  | 681.3819  | 682.3892  | 1 | 55.75 |
| LIC20100 |      |      |                                |                                                                                                                            |                                                |         |           |           |           |           |   |       |
|          | 2.08 | 6.0  | ELJHVTR                        | iTRAQ4plex@N-term                                                                                                          |                                                | -0.0076 | 1010.5919 | 506.3032  | 1010.5995 | 506.3070  | 2 | 38.81 |
|          | 2.08 | 6.0  | VGSDLAFTGGLLHNIGK              | iTRAQ4plex@N-term; iTRAQ4plex(K)@17                                                                                        |                                                | -0.0088 | 1986.1055 | 663.0424  | 1986.1142 | 663.0453  | 3 | 52.26 |
| LIC20097 |      |      |                                |                                                                                                                            |                                                |         |           |           |           |           |   |       |
|          | 2    | 6.3  | DLAIK                          | iTRAQ4plex@N-term; iTRAQ4plex(K)@5                                                                                         | cleaved M-D@N-term                             | -0.0106 | 846.5313  | 847.5385  | 846.5418  | 847.5491  | 1 | 57.49 |
|          | 2    | 6.3  | EAATRMVAAR                     | Glu->pyro-Glu@N-term; Deamidated(R)@5                                                                                      | missed R-M@5                                   | -0.0020 | 1057.5319 | 529.7732  | 1057.5339 | 529.7742  | 2 | 28.28 |
|          | 3.05 | 4.1  | FAAPWK                         | iTRAQ4plex@N-term; iTRAQ4plex(K)@6                                                                                         |                                                | 0.0393  | 1006.6237 | 504.3191  | 1006.5844 | 504.2995  | 2 | 43.15 |
|          | 2    | 6.3  | IGNFFPATAFILGPILR              | iTRAQ4plex@N-term                                                                                                          |                                                | -0.0377 | 1990.1149 | 996.0647  | 1990.1526 | 996.0836  | 2 | 41.51 |
|          | 3.05 | 4.1  | IILGK                          | iTRAQ4plex@N-term; iTRAQ4plex(K)@5                                                                                         |                                                | 0.0086  | 830.5919  | 416.3032  | 830.5833  | 416.2989  | 2 | 39.82 |
|          | 3.05 | 4.1  | KPLEVLIPSSR                    | iTRAQ4plex@N-term; iTRAQ4plex(K)@1                                                                                         |                                                | 0.0047  | 1525.9482 | 509.6567  | 1525.9435 | 509.6551  | 3 | 46.79 |
|          | 2    | 6.3  | LDVTSPSDWK                     | iTRAQ4plex@N-term; iTRAQ4plex(K)@10                                                                                        |                                                | 1.0226  | 1435.7825 | 718.8985  | 1434.7598 | 718.3872  | 2 | 31.44 |
|          | 2    | 6.3  | NIAS                           | No iTRAQ4plex@N-term                                                                                                       | cleaved V-N@N-term; cleaved S-L@C-term         | -0.0105 | 403.1963  | 404.2035  | 403.2067  | 404.2140  | 1 | 46.96 |
| LIC20096 |      |      |                                |                                                                                                                            |                                                |         |           |           |           |           |   |       |
|          | 10.2 | 15.1 | DLPHPVDR                       | iTRAQ4plex@N-term                                                                                                          |                                                | 0.0014  | 1091.5859 | 546.8002  | 1091.5845 | 546.7995  | 2 | 36.39 |
|          | 7.97 | 21.1 | DLPHPVDRLEDVR                  | iTRAQ4plex@N-term                                                                                                          | missed R-L@8                                   | -0.0298 | 1703.8779 | 426.9767  | 1703.9077 | 426.9842  | 4 | 32.61 |
|          | 7.97 | 21.1 | DLVRVPYPTTR                    | iTRAQ4plex@N-term                                                                                                          | cleaved Y-D@N-term; missed R-V@4               | -0.0690 | 1358.7103 | 453.9107  | 1358.7792 | 453.9337  | 3 | 29.26 |
|          | 7.97 | 21.1 | GLEQYISMVQEK                   | iTRAQ4plex@N-term; iTRAQ4plex(K)@12                                                                                        | cleaved I-G@N-term                             | 0.0087  | 1711.9146 | 571.6454  | 1711.9058 | 571.6426  | 3 | 31.90 |
|          | 7.97 | 21.1 | GYFPNAK                        | iTRAQ4plex@N-term; iTRAQ4plex(K)@7                                                                                         |                                                | 0.0042  | 1083.5999 | 542.8072  | 1083.5957 | 542.8051  | 2 | 28.76 |
|          | 7.97 | 21.1 | KRLAGSFGPFQSIGK                | iTRAQ4plex@N-term; iTRAQ4plex(K)@1; Deamidated(R)@2; iTRAQ4plex(K)@15                                                      | cleaved F-K@N-term; missed K-R@1; missed R-L@2 | -0.1301 | 2025.0436 | 676.0218  | 2025.1737 | 676.0652  | 3 | 26.68 |
|          | 10.2 | 15.1 | LAGSFGPFQSIGK                  | iTRAQ4plex@N-term; iTRAQ4plex(K)@13                                                                                        |                                                | -0.0078 | 1595.8838 | 798.9492  | 1595.8915 | 798.9530  | 2 | 45.87 |
|          | 10.2 | 15.1 | LEDVRKR                        | iTRAQ4plex@N-term; iTRAQ4plex(K)@6                                                                                         | missed R-K@5; missed K-R@6                     | 0.1650  | 1202.8989 | 602.4567  | 1202.7339 | 602.3742  | 2 | 53.37 |
|          | 7.97 | 21.1 | LFIVQYK                        | iTRAQ4plex@N-term; iTRAQ4plex(K)@7                                                                                         |                                                | -0.0197 | 1197.7168 | 599.8657  | 1197.7365 | 599.8755  | 2 | 52.26 |
|          | 10.2 | 15.1 | MLSGPQVVFYR                    | iTRAQ4plex@N-term                                                                                                          |                                                | -0.0053 | 1439.7665 | 720.8905  | 1439.7717 | 720.8931  | 2 | 44.63 |
|          | 7.97 | 21.1 | NPDFYNVMPSEMSTSYWLFPGTAPTFSGFR | iTRAQ4plex@N-term                                                                                                          |                                                | 0.0073  | 3589.6519 | 1197.5580 | 3589.6444 | 1197.5554 | 3 | 41.34 |
|          | 10.2 | 15.1 | RSYDLVR                        | No iTRAQ4plex@N-term; Deamidated(R)@7                                                                                      | cleaved Y-R@N-term; missed R-S@1               | 0.0486  | 908.5202  | 455.2674  | 908.4716  | 455.2431  | 2 | 34.90 |
|          | 7.97 | 21.1 | SISDFLGSR                      | iTRAQ4plex@N-term                                                                                                          |                                                | 0.0132  | 1124.6080 | 563.3113  | 1124.5948 | 563.3047  | 2 | 31.61 |
|          | 10.2 | 15.1 | SLPTPYMHILNR                   | iTRAQ4plex@N-term                                                                                                          | cleaved Y-S@N-term                             | 0.0068  | 1584.8636 | 529.2952  | 1584.8568 | 529.2929  | 3 | 47.83 |
|          | 7.97 | 21.1 | TLLFSPSDIDANAETPFFK            | iTRAQ4plex@N-term; iTRAQ4plex(K)@19                                                                                        |                                                | -0.0098 | 2400.2358 | 801.0859  | 2400.2457 | 801.0892  | 3 | 36.60 |
|          | 7.97 | 21.1 | TLLFSPSDIDANAETPFFKR           | iTRAQ4plex@N-term; Oxidation(P)@6; iTRAQ4plex(K)@19                                                                        | missed K-R@19                                  | -0.0079 | 2572.3340 | 858.4519  | 2572.3417 | 858.4545  | 3 | 34.73 |
|          | 7.97 | 21.1 | VDYISYDHLHTQDIR                | iTRAQ4plex@N-term                                                                                                          |                                                | -0.0025 | 2017.9955 | 673.6724  | 2017.9979 | 673.6733  | 3 | 32.99 |
| LIC20093 |      |      |                                |                                                                                                                            |                                                |         |           |           |           |           |   |       |
|          | 4    | 19.6 | EALGV                          | Glu->pyro-Glu@N-term                                                                                                       | cleaved S-E@N-term; cleaved V-Y@C-term         | 0.0518  | 469.3055  | 470.3128  | 469.2536  | 470.2609  | 1 | 59.46 |
|          | 4    | 21.5 | IQGS                           | iTRAQ4plex@N-term                                                                                                          | cleaved D-I@N-term; cleaved S-W@C-term         | 0.0244  | 547.3333  | 548.3405  | 547.3088  | 548.3160  | 1 | 42.24 |
|          | 4    | 21.5 | KVDPITTTVQDTLQEISK             | iTRAQ4plex@N-term; iTRAQ4plex(K)@1; iTRAQ4plex(K)@17                                                                       | missed K-V@1                                   | -0.0086 | 2334.2922 | 779.1047  | 2334.3008 | 779.1075  | 3 | 34.59 |
|          | 4    | 19.6 | VDPTTTVQDTL                    | iTRAQ4plex@N-term; Deamidated(Q)@8                                                                                         | cleaved L-Q@C-term                             | 0.0284  | 1333.7019 | 667.8582  | 1333.6735 | 667.8440  | 2 | 31.14 |
|          | 4    | 21.5 | VYGISLDALDSHGQFIQK             | iTRAQ4plex@N-term; iTRAQ4plex(K)@18                                                                                        |                                                | -0.0119 | 2278.2080 | 760.4100  | 2278.2201 | 760.4140  | 3 | 34.14 |
|          | 4    | 19.6 | YSLNFPLLSDPDHK                 | iTRAQ4plex@N-term; iTRAQ4plex(K)@14                                                                                        |                                                | 0.0448  | 1933.0636 | 645.3618  | 1933.0189 | 645.3469  | 3 | 51.51 |
| LIC20089 |      |      |                                |                                                                                                                            |                                                |         |           |           |           |           |   |       |
|          | 2    | 4.0  | EKLNLIYRDMQIASIQIQLNSLPNIPK    | iTRAQ4plex@N-term; iTRAQ4plex(K)@2; Deamidated(N)@4; Deamidated(R)@8; Deamidated(Q)@15; Deamidated(Q)@17; iTRAQ4plex(K)@26 | missed K-L@2; missed R-D@8                     | 0.0265  | 3474.9275 | 869.7391  | 3474.9009 | 869.7325  | 4 | 14.28 |

|          |       |      |                                                        |                                                                                                                          |                                                                   |         |           |           |           |           |   |       |
|----------|-------|------|--------------------------------------------------------|--------------------------------------------------------------------------------------------------------------------------|-------------------------------------------------------------------|---------|-----------|-----------|-----------|-----------|---|-------|
|          | 2     | 4.0  | GIAGMVLETPVIVN<br>DAANDPR                              | ITRAQ4plex@N-term                                                                                                        |                                                                   | 0.0089  | 2537.3369 | 846.7863  | 2537.3281 | 846.7833  | 3 | 42.28 |
|          | 2     | 4.0  | LENLIK                                                 | ITRAQ4plex@N-term;<br>Deamidated(N)@3;<br>ITRAQ4plex(K)@6                                                                | cleaved G-L@N-term                                                | 0.0108  | 1017.6422 | 509.8284  | 1017.6314 | 509.8230  | 2 | 34.58 |
|          | 2     | 4.0  | NRRLIRDLIK                                             | ITRAQ4plex@N-term;<br>Deamidated(N)@1;<br>Deamidated(R)@3;<br>Oxidation(R)@6;<br>ITRAQ4plex(K)@9                         | missed R-R@2; missed R-L@3; missed R-D@6                          | -0.0466 | 1488.8514 | 497.2911  | 1488.8980 | 497.3066  | 3 | 39.84 |
| LIC20064 |       |      |                                                        |                                                                                                                          |                                                                   |         |           |           |           |           |   |       |
|          | 2     | 4.3  | TAMVAIPLKR                                             | ITRAQ4plex@N-term;<br>ITRAQ4plex(K)@10                                                                                   | missed K-R@10                                                     | -0.0029 | 1457.8967 | 486.9728  | 1457.8996 | 486.9738  | 3 | 43.13 |
| LIC20058 |       |      |                                                        |                                                                                                                          |                                                                   |         |           |           |           |           |   |       |
|          | 10.18 | 9.1  | ADIPVVFVGGIIPPSDFE<br>TLTK                             | ITRAQ4plex@N-term;<br>ITRAQ4plex(K)@21                                                                                   |                                                                   | -0.0012 | 2503.3806 | 835.4675  | 2503.3818 | 835.4679  | 3 | 37.87 |
|          | 10.18 | 9.1  | AFTEMWDEITK                                            | ITRAQ4plex@N-term;<br>ITRAQ4plex(K)@11                                                                                   |                                                                   | -0.0028 | 1657.8237 | 829.9191  | 1657.8265 | 829.9205  | 2 | 36.41 |
|          | 4     | 4.2  | GVVSLQGTQNDII<br>K                                     | ITRAQ4plex@N-term; No<br>ITRAQ4plex(K)@17                                                                                |                                                                   | -0.0263 | 1944.0386 | 649.0201  | 1944.0650 | 649.0289  | 3 | 50.63 |
|          | 10.18 | 9.1  | GVPIINLEDFR                                            | ITRAQ4plex@N-term                                                                                                        | cleaved V-G@N-term                                                | -4.9973 | 1398.7559 | 700.3852  | 1403.7531 | 702.8838  | 2 | 42.68 |
|          | 10.18 | 9.1  | ILIEALGVTMSR                                           | ITRAQ4plex@N-term                                                                                                        |                                                                   | -0.0495 | 1445.7903 | 723.9024  | 1445.8398 | 723.9272  | 2 | 53.71 |
|          | 10.18 | 9.1  | LDAIK                                                  | ITRAQ4plex@N-term;<br>ITRAQ4plex(K)@5                                                                                    | cleaved I-L@N-term                                                | 0.0189  | 846.5607  | 424.2876  | 846.5418  | 424.2782  | 2 | 39.47 |
|          | 10.18 | 9.1  | LLSLYVALAQER                                           | ITRAQ4plex@N-term;<br>Oxidation(Y)@5                                                                                     | cleaved Y-L@N-term                                                | 0.0243  | 1534.9084 | 768.4615  | 1534.8841 | 768.4493  | 2 | 35.10 |
|          | 4     | 4.2  | LQLP                                                   | ITRAQ4plex@N-term                                                                                                        | cleaved A-L@N-term; cleaved P-A@C-term                            | -0.0002 | 613.3919  | 614.3992  | 613.3921  | 614.3994  | 1 | 50.66 |
|          | 10.18 | 9.1  | PATGVEGQK                                              | ITRAQ4plex@N-term;<br>ITRAQ4plex(K)@9                                                                                    | cleaved R-P@N-term                                                | -0.0039 | 1173.6558 | 587.8351  | 1173.6597 | 587.8371  | 2 | 24.60 |
|          | 10.18 | 9.1  | SVFGEYR PATGVEGQ<br>K                                  | ITRAQ4plex@N-term;<br>ITRAQ4plex(K)@16                                                                                   |                                                                   | -0.0145 | 2012.0427 | 671.6882  | 2012.0571 | 671.6930  | 3 | 30.84 |
|          | 10.18 | 9.1  | TDAK                                                   | No ITRAQ4plex@N-term;<br>ITRAQ4plex(K)@4                                                                                 | cleaved E-T@N-term                                                | 0.0381  | 577.3574  | 578.3647  | 577.3193  | 578.3266  | 1 | 56.92 |
|          | 10.18 | 9.1  | VGISTGEWADVLR                                          | Delta-H(2)C(2)@N-term;<br>Methyl(I)@3                                                                                    |                                                                   | 0.0049  | 1441.7615 | 721.8880  | 1441.7565 | 721.8855  | 2 | 37.19 |
|          | 10.18 | 9.1  | VGVPINLEDFR                                            | Methylthio@N-term;<br>Deamidated(N)@6                                                                                    |                                                                   | 0.0060  | 1405.6971 | 703.8558  | 1405.6912 | 703.8529  | 2 | 27.89 |
|          | 10.18 | 9.1  | WTEGIASPLMTDQDG<br>GVFK                                | No ITRAQ4plex@N-term;<br>Oxidation(F)@8;<br>ITRAQ4plex(K)@19                                                             |                                                                   | 0.0675  | 2211.1313 | 1106.5730 | 2211.0640 | 1106.5393 | 2 | 31.67 |
| LIC20044 |       |      |                                                        |                                                                                                                          |                                                                   |         |           |           |           |           |   |       |
|          | 16.09 | 16.6 | AEPLKAETVPAVLLP<br>EHLR                                | ITRAQ4plex@N-term;<br>ITRAQ4plex(K)@5                                                                                    | missed K-A@5                                                      | -0.0078 | 2469.4485 | 618.3694  | 2469.4563 | 618.3713  | 4 | 36.06 |
|          | 8.15  | 7.9  | AETVPAVLLPEHLR                                         | Carbamyl@N-term                                                                                                          |                                                                   | 0.0058  | 1685.9523 | 843.9834  | 1685.9465 | 843.9805  | 2 | 47.69 |
|          | 8.15  | 7.9  | DAITK                                                  | No ITRAQ4plex@N-term;<br>ITRAQ4plex(K)@5                                                                                 | cleaved S-D@N-term                                                | 0.0106  | 690.4139  | 691.4212  | 690.4034  | 691.4107  | 1 | 57.98 |
|          | 16.09 | 16.6 | DLIFFK                                                 | ITRAQ4plex@N-term;<br>ITRAQ4plex(K)@6                                                                                    |                                                                   | 0.0032  | 1069.6448 | 535.8297  | 1069.6416 | 535.8281  | 2 | 44.70 |
|          | 16.09 | 16.6 | DVNQSGIKLYCNHVFV<br>SDDANDLVPKFLTVLK<br>GTIDIPDLPLNVSR | ITRAQ4plex@N-term;<br>Deamidated(N)@3;<br>ITRAQ4plex(K)@8;<br>Methylthio(C)@11;<br>ITRAQ4plex(K)@26;<br>ITRAQ4plex(K)@32 | cleaved L-D@N-term; missed K-L@8;<br>missed K-F@26; missed K-G@32 | -0.0155 | 5705.0181 | 951.8436  | 5705.0336 | 951.8462  | 6 | 45.14 |
|          | 16.09 | 16.6 | EDYWVK                                                 | ITRAQ4plex@N-term;<br>ITRAQ4plex(K)@6                                                                                    | cleaved L-E@N-term                                                | 0.0075  | 1141.5723 | 571.7934  | 1141.5648 | 571.7897  | 2 | 28.78 |
|          | 16.09 | 16.6 | ELVSNASDAITK                                           | ITRAQ4plex@N-term;<br>ITRAQ4plex(K)@12                                                                                   |                                                                   | -0.0156 | 1534.8290 | 768.4218  | 1534.8446 | 768.4296  | 2 | 28.44 |
|          | 16.09 | 16.6 | GLSSAK                                                 | ITRAQ4plex@N-term;<br>ITRAQ4plex(K)@6                                                                                    |                                                                   | 0.0180  | 849.5344  | 425.7745  | 849.5164  | 425.7655  | 2 | 44.17 |
|          | 16.09 | 16.6 | GTIDIPDLPLNVSR                                         | ITRAQ4plex@N-term                                                                                                        |                                                                   | -0.0190 | 1652.9030 | 827.4587  | 1652.9219 | 827.4682  | 2 | 34.12 |
|          | 16.09 | 16.6 | IDLDFDQEK                                              | ITRAQ4plex@N-term;<br>ITRAQ4plex(K)@9                                                                                    |                                                                   | 0.0018  | 1409.7300 | 705.8723  | 1409.7282 | 705.8714  | 2 | 31.80 |
|          | 8.15  | 7.9  | IDLDFDQEK                                              | ITRAQ4plex@N-term;<br>ITRAQ4plex(K)@9                                                                                    | missed K-R@9                                                      | 0.0134  | 1565.8427 | 522.9548  | 1565.8293 | 522.9504  | 3 | 44.96 |
|          | 16.09 | 16.6 | IDSHFIQFLESK                                           | ITRAQ4plex@N-term;<br>ITRAQ4plex(K)@12                                                                                   |                                                                   | -0.0030 | 1750.9468 | 584.6562  | 1750.9498 | 584.6572  | 3 | 36.06 |
|          | 16.09 | 16.6 | ISVETENIFPIIK                                          | ITRAQ4plex@N-term;<br>ITRAQ4plex(K)@13                                                                                   |                                                                   | 0.0107  | 1790.0540 | 896.0342  | 1790.0433 | 896.0289  | 2 | 35.12 |
|          | 8.15  | 7.9  | IVDSD                                                  | ITRAQ4plex@N-term                                                                                                        | cleaved P-I@N-term; cleaved D-N@C-term                            | 0.0281  | 691.3791  | 692.3864  | 691.3510  | 692.3583  | 1 | 43.96 |
|          | 16.09 | 16.6 | IVDSDNKTEADIR                                          | ITRAQ4plex@N-term;<br>ITRAQ4plex(K)@7                                                                                    | cleaved P-I@N-term; missed K-T@7;<br>missed R-I@12                | -0.0132 | 1919.0183 | 640.6801  | 1919.0316 | 640.6845  | 3 | 47.28 |

|          |       |      |                                                      |                                                                                                                                                                      |                                                           |         |           |           |           |           |   |       |
|----------|-------|------|------------------------------------------------------|----------------------------------------------------------------------------------------------------------------------------------------------------------------------|-----------------------------------------------------------|---------|-----------|-----------|-----------|-----------|---|-------|
|          | 16.09 | 16.6 | LEDYWNKNEKNNNG<br>KVIFYASETSSVYMDLL<br>KSQGLEAILVDSR | No iTRAQ4plex@N-term;<br>Deamidated(N)@6;<br>iTRAQ4plex(K)@7;<br>iTRAQ4plex(K)@9;<br>iTRAQ4plex(K)@11;<br>iTRAQ4plex(K)@15;<br>iTRAQ4plex(K)@31;<br>Deamidated(Q)@33 | missed K-N@7; missed K-N@11; missed K-V@15; missed K-S@31 | -0.0959 | 5703.8633 | 951.6511  | 5703.9591 | 951.6671  | 6 | 45.86 |
|          | 8.15  | 7.9  | LIFFK                                                | iTRAQ4plex@N-term;<br>iTRAQ4plex(K)@5                                                                                                                                | cleaved D-L@N-term                                        | 0.0128  | 954.6275  | 478.3210  | 954.6146  | 478.3146  | 2 | 47.80 |
|          | 16.09 | 16.6 | LNEEFKNEEEFR                                         | No iTRAQ4plex@N-term;<br>iTRAQ4plex(K)@6;<br>iTRAQ4plex(K)@7;<br>Deamidated(N)@8;<br>Deamidated(R)@13                                                                | missed K-K@6; missed K-N@7                                | -0.1029 | 2000.8906 | 1001.4530 | 2000.9935 | 1001.5040 | 2 | 29.45 |
|          | 16.09 | 16.6 | LOGILYFPK                                            | iTRAQ4plex@N-term;<br>iTRAQ4plex(K)@9                                                                                                                                |                                                           | -0.0048 | 1365.8217 | 683.9181  | 1365.8264 | 683.9205  | 2 | 34.80 |
|          | 16.09 | 16.6 | SQGLEAILVDSR                                         | iTRAQ4plex@N-term                                                                                                                                                    |                                                           | -0.0078 | 1430.7773 | 716.3959  | 1430.7851 | 716.3998  | 2 | 32.57 |
| LIC20035 |       |      |                                                      |                                                                                                                                                                      |                                                           |         |           |           |           |           |   |       |
|          | 6     | 8.6  | ASYKPDIPFTYYK                                        | iTRAQ4plex@N-term;<br>iTRAQ4plex(K)@4;<br>iTRAQ4plex(K)@13                                                                                                           |                                                           | -0.0048 | 2024.0936 | 675.7051  | 2024.0984 | 675.7068  | 3 | 33.46 |
|          | 6     | 8.6  | DLEVQILP                                             | iTRAQ4plex@N-term                                                                                                                                                    | cleaved P-P@C-term                                        | 0.0278  | 1069.6420 | 535.8282  | 1069.6141 | 535.8143  | 2 | 41.45 |
|          | 6     | 8.6  | DLEVQILPPNIR                                         | iTRAQ4plex@N-term                                                                                                                                                    |                                                           | -0.0750 | 1549.8199 | 775.9172  | 1549.8950 | 775.9548  | 2 | 58.61 |
|          | 3.83  | 5.0  | DTPYVGGVK                                            | iTRAQ4plex@N-term;<br>iTRAQ4plex(K)@9                                                                                                                                |                                                           | 0.0045  | 1222.6846 | 612.3495  | 1222.6801 | 612.3473  | 2 | 37.37 |
|          | 6     | 8.6  | EYQEKEDSATK                                          | iTRAQ4plex@N-term;<br>iTRAQ4plex(K)@5;<br>iTRAQ4plex(K)@11                                                                                                           |                                                           | -0.0276 | 1758.8727 | 587.2982  | 1758.9001 | 587.3073  | 3 | 26.85 |
|          | 6     | 8.6  | GKDLEVQILPPNIR                                       | iTRAQ4plex@N-term;<br>iTRAQ4plex(K)@2                                                                                                                                |                                                           | -0.0002 | 1879.1133 | 627.3784  | 1879.1135 | 627.3784  | 3 | 32.81 |
|          | 6     | 8.6  | QFEIVSDSK                                            | Gln->pyro-Glu@N-term;<br>iTRAQ4plex(K)@9                                                                                                                             |                                                           | 0.0046  | 1178.5988 | 590.3066  | 1178.5941 | 590.3043  | 2 | 41.10 |
|          | 3.83  | 5.0  | QGQETSFKH                                            | Gln->pyro-Glu@N-term;<br>iTRAQ4plex(S)@6;<br>iTRAQ4plex(K)@9                                                                                                         |                                                           | 0.0084  | 1331.6797 | 444.9005  | 1331.6713 | 444.8977  | 3 | 35.68 |
|          | 3.83  | 5.0  | SGYWYK                                               | iTRAQ4plex@N-term;<br>iTRAQ4plex(K)@5                                                                                                                                |                                                           | 0.0009  | 927.5067  | 464.7606  | 927.5058  | 464.7602  | 2 | 38.12 |
| LIC20026 |       |      |                                                      |                                                                                                                                                                      |                                                           |         |           |           |           |           |   |       |
|          | 3.7   | 8.8  | GLPGSASYSSSK                                         | No iTRAQ4plex@N-term;<br>iTRAQ4plex(K)@12                                                                                                                            |                                                           | 0.0074  | 1283.6554 | 642.8350  | 1283.6479 | 642.8312  | 2 | 35.58 |
|          | 3.7   | 8.8  | GLPGSASYSSSKAGL<br>SVYMEALR                          | iTRAQ4plex@N-term;<br>Oxidation(P)@3;<br>iTRAQ4plex(K)@12                                                                                                            | missed K-A@12                                             | -0.0230 | 2634.3337 | 879.1185  | 2634.3567 | 879.1262  | 3 | 56.54 |
|          | 3.7   | 8.8  | SRPFVISVER                                           | Carbamyl@N-term                                                                                                                                                      |                                                           | -0.0082 | 1231.6591 | 616.8368  | 1231.6673 | 616.8409  | 2 | 41.75 |
| LIC20022 |       |      |                                                      |                                                                                                                                                                      |                                                           |         |           |           |           |           |   |       |
|          | 1.7   | 4.5  | IAIAGPHR                                             | iTRAQ4plex@N-term                                                                                                                                                    |                                                           | -0.0090 | 1090.6643 | 546.3394  | 1090.6733 | 546.3439  | 2 | 41.34 |
| LIC20021 |       |      |                                                      |                                                                                                                                                                      |                                                           |         |           |           |           |           |   |       |
|          | 2     | 6.4  | EKFLKELSSLKK                                         | No iTRAQ4plex@N-term;<br>iTRAQ4plex(K)@2;<br>iTRAQ4plex(K)@5;<br>iTRAQ4plex(K)@11;<br>iTRAQ4plex(K)@12                                                               | missed K-F@2; missed K-K@11                               | -0.1061 | 2025.1624 | 676.0614  | 2025.2685 | 676.0968  | 3 | 37.36 |
|          | 2     | 6.4  | LEIQLSDI                                             | No iTRAQ4plex@N-term                                                                                                                                                 | cleaved I-V@C-term                                        | -0.0044 | 929.5026  | 465.7586  | 929.5070  | 465.7608  | 2 | 27.22 |
|          | 2     | 6.4  | VFGKEEVSDLVESMK                                      | iTRAQ4plex@N-term;<br>iTRAQ4plex(K)@4;<br>iTRAQ4plex(K)@15                                                                                                           |                                                           | -0.0017 | 2128.1436 | 710.3884  | 2128.1451 | 710.3890  | 3 | 35.95 |
| LIC20016 |       |      |                                                      |                                                                                                                                                                      |                                                           |         |           |           |           |           |   |       |
|          | 2     | 3.7  | ILVF                                                 | iTRAQ4plex@N-term                                                                                                                                                    | cleaved L-I@N-term; cleaved F-G@C-term                    | -0.0219 | 634.3957  | 635.4030  | 634.4176  | 635.4249  | 1 | 54.64 |
|          | 2     | 3.7  | NKPAPPPPPPK                                          | iTRAQ4plex@N-term;<br>iTRAQ4plex(K)@2;<br>iTRAQ4plex(K)@12                                                                                                           |                                                           | -0.0075 | 1668.0015 | 557.0078  | 1668.0088 | 557.0102  | 3 | 26.36 |
|          | 2     | 3.7  | PPPPPPK                                              | No iTRAQ4plex@N-term;<br>Oxidation(P)@3;<br>iTRAQ4plex(K)@7                                                                                                          | cleaved P-P@N-term                                        | -0.0440 | 888.4751  | 445.2448  | 888.5191  | 445.2668  | 2 | 60.94 |
| LIC20011 |       |      |                                                      |                                                                                                                                                                      |                                                           |         |           |           |           |           |   |       |
|          | 2.82  | 2.5  | AGLATLK                                              | iTRAQ4plex@N-term;<br>iTRAQ4plex(K)@7                                                                                                                                |                                                           | -0.0333 | 960.5879  | 481.3012  | 960.6212  | 481.3179  | 2 | 38.25 |
|          | 4     | 10.4 | DLLDLVAPSGPVYQA<br>GTLSANPFGMR                       | iTRAQ4plex@N-term                                                                                                                                                    |                                                           | -0.0313 | 2832.4290 | 945.1503  | 2832.4602 | 945.1607  | 3 | 39.76 |
|          | 4     | 10.4 | DPEVEEVVR                                            | iTRAQ4plex@N-term                                                                                                                                                    |                                                           | -0.0126 | 1214.6139 | 608.3142  | 1214.6265 | 608.3205  | 2 | 30.41 |
|          | 4     | 10.4 | ETTEIAWSFGAAEPYS<br>LELAELISSR                       | iTRAQ4plex@N-term                                                                                                                                                    |                                                           | -0.0785 | 3013.4255 | 1005.4820 | 3013.5042 | 1005.5087 | 3 | 51.21 |

|          |      |      |                                                             |                                                                             |                                                                                                                     |         |           |          |           |          |   |       |
|----------|------|------|-------------------------------------------------------------|-----------------------------------------------------------------------------|---------------------------------------------------------------------------------------------------------------------|---------|-----------|----------|-----------|----------|---|-------|
|          | 4    | 10.4 | GAAEPYSLELAEISS<br>RVPWAEKVRVNSGT<br>EAVMSALRVARAATG<br>REK | ITRAQ4plex@N-term;<br>ITRAQ4plex(K)@23;<br>ITRAQ4plex(K)@49                 | cleaved F-G@N-term; missed R-V@17;<br>missed K-V@23; missed R-F@25; missed R-<br>V@39; missed R-A@42; missed R-E@47 | -0.3552 | 5704.7290 | 951.7954 | 5705.0841 | 951.8546 | 6 | 59.31 |
|          | 4    | 10.4 | GGGFFVGCYAGK                                                | ITRAQ4plex@N-term;<br>Methylthio(C)@8;<br>ITRAQ4plex(K)@12                  | cleaved I-G@N-term                                                                                                  | 0.0830  | 1445.7870 | 723.9008 | 1445.7039 | 723.8592 | 2 | 58.51 |
|          | 4    | 10.4 | ISDFWK                                                      | ITRAQ4plex@N-term;<br>ITRAQ4plex(K)@6                                       | cleaved L-I@N-term                                                                                                  | 0.0001  | 1082.6006 | 542.3076 | 1082.6004 | 542.3075 | 2 | 43.52 |
|          | 2.82 | 2.5  | LISDFWK                                                     | ITRAQ4plex@N-term;<br>ITRAQ4plex(K)@7                                       |                                                                                                                     | 0.0114  | 1195.6959 | 598.8552 | 1195.6845 | 598.8495 | 2 | 48.67 |
|          | 4    | 10.4 | NIAALIEPLPANYGLLI<br>QR                                     | ITRAQ4plex@N-term                                                           |                                                                                                                     | -0.0207 | 2335.3542 | 779.4587 | 2335.3749 | 779.4656 | 3 | 40.39 |
|          | 4    | 10.4 | SGLAG                                                       | ITRAQ4plex@N-term                                                           | cleaved G-S@N-term; cleaved G-E@C-term                                                                              | -0.0049 | 547.3039  | 548.3112 | 547.3088  | 548.3160 | 1 | 41.87 |
|          | 2.82 | 2.5  | VFHTFLK                                                     | ITRAQ4plex@N-term;<br>ITRAQ4plex(K)@7                                       |                                                                                                                     | -0.0154 | 1178.6902 | 590.3524 | 1178.7055 | 590.3601 | 2 | 50.64 |
|          | 4    | 10.4 | VNSGTEAVMSALRVA<br>RAATGR                                   | ITRAQ4plex@N-term;<br>Deamidated(N)@2                                       | cleaved F-V@N-term; missed R-V@13;<br>missed R-A@16                                                                 | 0.0398  | 2261.2429 | 754.7549 | 2261.2032 | 754.7417 | 3 | 49.87 |
|          | 4    | 10.4 | VRFVNSGTEAVMSAL<br>RVARAATGREKILK                           | ITRAQ4plex@N-term; No<br>ITRAQ4plex(K)@26;<br>ITRAQ4plex(K)@29              | missed R-F@2; missed R-V@16; missed R-<br>A@19; missed R-E@24; missed K-I@26                                        | -0.0750 | 3417.8848 | 855.4785 | 3417.9598 | 855.4972 | 4 | 41.75 |
|          | 2.82 | 2.5  | VSPGGVHSPVR                                                 | CarbamyI@N-term;<br>ITRAQ4plex(S)@2                                         |                                                                                                                     | -0.0013 | 1277.6949 | 426.9056 | 1277.6962 | 426.9060 | 3 | 36.26 |
| LIC20010 |      |      |                                                             |                                                                             |                                                                                                                     |         |           |          |           |          |   |       |
|          | 4.01 | 12.0 | DKEEGADFLMVKPGM<br>TSIDLIGPIR                               | ITRAQ4plex@N-term;<br>ITRAQ4plex(K)@2;<br>ITRAQ4plex(K)@12                  |                                                                                                                     | -0.0149 | 3163.6838 | 791.9282 | 3163.6987 | 791.9319 | 4 | 44.93 |
|          | 4.01 | 12.0 | IVEGLK                                                      | ITRAQ4plex@N-term;<br>ITRAQ4plex(K)@6                                       | cleaved F-I@N-term                                                                                                  | 0.0324  | 945.6427  | 473.8286 | 945.6103  | 473.8124 | 2 | 33.01 |
|          | 4.01 | 12.0 | KLIQPIFIVEGLK                                               | ITRAQ4plex@N-term;<br>ITRAQ4plex(K)@1;<br>ITRAQ4plex(K)@13                  | missed K-L@1                                                                                                        | 0.0000  | 1929.2393 | 644.0870 | 1929.2392 | 644.0870 | 3 | 37.36 |
|          | 4.01 | 12.0 | YGPFRAAADSAPAQG<br>DR                                       | No ITRAQ4plex@N-term;<br>Deamidated(R)@5                                    | cleaved F-Y@N-term; missed R-A@5                                                                                    | 0.0082  | 1749.8153 | 584.2791 | 1749.8071 | 584.2763 | 3 | 24.13 |
| LIC20001 |      |      |                                                             |                                                                             |                                                                                                                     |         |           |          |           |          |   |       |
|          | 6    | 6.4  | AERVVQGNDDRLR                                               | ITRAQ4plex@N-term;<br>Oxidation(R)@3;<br>Deamidated(N)@8;<br>Oxidation(D)@9 | missed R-V@3; missed R-L@11                                                                                         | 0.0517  | 1703.9189 | 852.9667 | 1703.8673 | 852.9409 | 2 | 34.27 |
|          | 6    | 6.4  | ALVAEGESEFLGTVRI<br>STGK                                    | No ITRAQ4plex@N-term;<br>ITRAQ4plex(K)@20                                   | missed R-I@15                                                                                                       | -0.0457 | 2207.1462 | 552.7938 | 2207.1919 | 552.8053 | 4 | 37.54 |
|          | 6    | 6.4  | AVTADDPRL                                                   | ITRAQ4plex@N-term                                                           | cleaved L-R@C-term; missed R-L@8                                                                                    | 0.0221  | 1100.6169 | 551.3157 | 1100.5948 | 551.3047 | 2 | 29.98 |
|          | 4.06 | 3.0  | EGVVVQGNDKR                                                 | ITRAQ4plex@N-term;<br>Deamidated(N)@8;<br>ITRAQ4plex(K)@10                  | missed K-R@10                                                                                                       | -0.0097 | 1488.8042 | 497.2754 | 1488.8140 | 497.2786 | 3 | 35.43 |
|          | 6    | 6.4  | ENLIDORPDYGVSSK                                             | ITRAQ4plex@N-term;<br>ITRAQ4plex(K)@15                                      |                                                                                                                     | 0.0013  | 2095.0593 | 699.3604 | 2095.0578 | 699.3599 | 3 | 31.32 |
|          | 6    | 6.4  | FFPVNPSDVISEGDLV<br>MGEDGR                                  | ITRAQ4plex@N-term                                                           |                                                                                                                     | -0.0143 | 2636.2771 | 879.7663 | 2636.2914 | 879.7711 | 3 | 40.46 |
|          | 6    | 6.4  | IDLGSISR                                                    | ITRAQ4plex@N-term                                                           | cleaved L-I@N-term                                                                                                  | 0.0068  | 1003.5853 | 502.7999 | 1003.5784 | 502.7965 | 2 | 29.21 |
|          | 6    | 6.4  | IGYGEK                                                      | ITRAQ4plex@N-term;<br>ITRAQ4plex(K)@6                                       | cleaved L-I@N-term                                                                                                  | 0.0079  | 953.5505  | 477.7825 | 953.5426  | 477.7786 | 2 | 28.62 |
|          | 4.06 | 3.0  | ISAESLRPGSLFGK                                              | ITRAQ4plex@N-term;<br>ITRAQ4plex(K)@14                                      |                                                                                                                     | -0.0049 | 1748.9979 | 584.0066 | 1749.0029 | 584.0082 | 3 | 46.09 |
|          | 6    | 6.4  | ISLQLEVGISGIVK                                              | ITRAQ4plex@N-term;<br>Deamidated(O)@5;<br>ITRAQ4plex(K)@15                  |                                                                                                                     | -0.0441 | 1801.0364 | 601.3527 | 1801.0804 | 601.3674 | 3 | 46.46 |
|          | 4.06 | 3.0  | LASNGENRAERVVQG<br>NDDR                                     | No ITRAQ4plex@N-term;<br>Deamidated(N)@7;<br>Deamidated(N)@16               | missed R-A@8; missed R-V@11                                                                                         | -0.0020 | 2100.9766 | 701.3328 | 2100.9784 | 701.3334 | 3 | 29.63 |
|          | 6    | 6.4  | NGESSEAAVQGNDK<br>R                                         | ITRAQ4plex@N-term;<br>Deamidated(N)@1;<br>ITRAQ4plex(K)@15                  | missed K-R@15                                                                                                       | -0.0134 | 1978.9303 | 660.6507 | 1978.9436 | 660.6551 | 3 | 25.22 |
|          | 4.06 | 3.0  | RSGLVR                                                      | ITRAQ4plex@N-term                                                           | cleaved L-R@N-term; missed R-S@1                                                                                    | 0.0189  | 830.5397  | 416.2771 | 830.5208  | 416.2677 | 2 | 37.68 |
|          | 4.06 | 3.0  | SGVALLASGK                                                  | No ITRAQ4plex@N-term;<br>ITRAQ4plex(K)@10                                   |                                                                                                                     | 0.0270  | 1045.6253 | 523.8334 | 1045.6253 | 523.8199 | 2 | 39.01 |
|          | 4.06 | 3.0  | SLFGK                                                       | ITRAQ4plex@N-term;<br>ITRAQ4plex(K)@5                                       | cleaved G-S@N-term                                                                                                  | 0.0053  | 838.5209  | 420.2677 | 838.5156  | 420.2651 | 2 | 38.66 |
|          | 6    | 6.4  | TGQWNFSLVQAK                                                | ITRAQ4plex@N-term;<br>Oxidation(W)@4;<br>ITRAQ4plex(K)@12                   |                                                                                                                     | -0.1457 | 1681.7574 | 561.5931 | 1681.9031 | 561.6417 | 3 | 23.80 |
|          | 6    | 6.4  | VVQGNDDRLR                                                  | ITRAQ4plex@N-term                                                           | missed R-L@8                                                                                                        | -0.0155 | 1314.6971 | 658.3558 | 1314.7126 | 658.3636 | 2 | 29.39 |
|          | 6    | 6.4  | YGLAILSEPGAAEPGK                                            | No ITRAQ4plex@N-term;<br>Oxidation(P)@9;<br>ITRAQ4plex(K)@16                |                                                                                                                     | 0.0682  | 1731.9847 | 578.3355 | 1731.9165 | 578.3128 | 3 | 42.09 |
| LIC13488 |      |      |                                                             |                                                                             |                                                                                                                     |         |           |          |           |          |   |       |

|          |      |      |                                   |                                                                                |                                        |         |           |          |           |          |   |       |
|----------|------|------|-----------------------------------|--------------------------------------------------------------------------------|----------------------------------------|---------|-----------|----------|-----------|----------|---|-------|
|          | 1.7  | 4.1  | ISEGHAR                           | ITRAQ4plex@N-term                                                              | cleaved R-P@C-term                     | 0.0259  | 912.5159  | 457.2652 | 912.4899  | 457.2522 | 2 | 37.10 |
|          | 2    | 4.1  | ISEIRPNPGQPR                      | ITRAQ4plex@N-term                                                              |                                        | -0.0088 | 1506.8301 | 503.2840 | 1506.8389 | 503.2869 | 3 | 28.05 |
|          | 2    | 4.1  | LAYQ                              | ITRAQ4plex@N-term                                                              | cleaved Q-L@N-term; cleaved Q-I@C-term | 0.0330  | 637.3887  | 638.3960 | 637.3557  | 638.3630 | 1 | 55.89 |
|          | 1.7  | 4.1  | QLDS                              | Gln->pyro-Glu@N-term                                                           | cleaved S-G@C-term                     | 0.1552  | 444.3409  | 445.3481 | 444.1856  | 445.1929 | 1 | 1.85  |
|          | 2    | 4.1  | QPRK                              | Gln->pyro-Glu@N-term;<br>ITRAQ4plex(K)@4                                       | cleaved G-Q@N-term; missed R-K@3       | 0.0027  | 654.3962  | 655.4035 | 654.3935  | 655.4008 | 1 | 57.10 |
| LIC13470 |      |      |                                   |                                                                                |                                        |         |           |          |           |          |   |       |
|          | 8.17 | 13.4 | EDNIEFIK                          | ITRAQ4plex@N-term;<br>ITRAQ4plex(K)@9                                          |                                        | 0.0195  | 1407.8049 | 704.9097 | 1407.7853 | 704.8999 | 2 | 47.60 |
|          | 8.17 | 13.4 | EPQINLFK                          | ITRAQ4plex@N-term;<br>ITRAQ4plex(K)@8                                          |                                        | -0.0035 | 1275.7395 | 638.8770 | 1275.7431 | 638.8788 | 2 | 31.61 |
|          | 8.17 | 13.4 | FIK                               | ITRAQ4plex@N-term;<br>ITRAQ4plex(K)@4                                          | cleaved E-F@N-term                     | 0.0527  | 807.5989  | 404.8067 | 807.5462  | 404.7804 | 2 | 49.28 |
|          | 8.17 | 13.4 | GGVIP                             | No ITRAQ4plex@N-term                                                           | cleaved S-G@N-term; cleaved P-P@C-term | 0.0000  | 441.2587  | 442.2660 | 441.2587  | 442.2660 | 1 | 60.44 |
|          | 8.17 | 13.4 | GLADVGYTVR                        | ITRAQ4plex@N-term                                                              |                                        | -0.0063 | 1193.6464 | 597.8304 | 1193.6526 | 597.8336 | 2 | 29.20 |
|          | 8.17 | 13.4 | IGMSELLEHK                        | ITRAQ4plex@N-term;<br>ITRAQ4plex(K)@11                                         | cleaved F-I@N-term                     | -0.0004 | 1572.8423 | 525.2880 | 1572.8425 | 525.2881 | 3 | 31.78 |
|          | 8.17 | 13.4 | ISGNTGYEEFK                       | ITRAQ4plex@N-term;<br>ITRAQ4plex(K)@12                                         |                                        | -0.0097 | 1632.8142 | 817.4144 | 1632.8239 | 817.4192 | 2 | 29.20 |
|          | 8.17 | 13.4 | KEGEALVHR                         | ITRAQ4plex@N-term;<br>ITRAQ4plex(K)@1;<br>ITRAQ4plex(H)@8                      |                                        | 0.0178  | 1469.8857 | 490.9692 | 1469.8680 | 490.9633 | 3 | 34.90 |
|          | 3.22 | 3.2  | VREQAEAVK                         | Carbamyl@N-term;<br>ITRAQ4plex(K)@9                                            | missed R-E@2                           | 0.0161  | 1215.6854 | 608.8500 | 1215.6693 | 608.8419 | 2 | 34.96 |
| LIC13416 |      |      |                                   |                                                                                |                                        |         |           |          |           |          |   |       |
|          | 3.52 | 6.0  | MNGGGAINWK                        | ITRAQ4plex@N-term;<br>Deamidated(N)@2;<br>ITRAQ4plex(K)@10                     |                                        | -0.0104 | 1335.6744 | 668.8445 | 1335.6849 | 668.8497 | 2 | 41.23 |
| LIC13410 |      |      |                                   |                                                                                |                                        |         |           |          |           |          |   |       |
|          | 2    | 10.4 | LNTQ                              | ITRAQ4plex@N-term;<br>Oxidation(N)@2                                           | cleaved E-L@N-term; cleaved Q-D@C-term | 0.0549  | 634.3957  | 635.4030 | 634.3408  | 635.3481 | 1 | 54.64 |
|          | 2    | 10.4 | TLAERPATVTEDTK                    | ITRAQ4plex@N-term;<br>ITRAQ4plex(K)@14                                         |                                        | 0.0122  | 1819.0052 | 607.3423 | 1818.9931 | 607.3383 | 3 | 28.17 |
| LIC13395 |      |      |                                   |                                                                                |                                        |         |           |          |           |          |   |       |
|          | 2    | 12.8 | VTFEGDKIPDLTLDV<br>LHEK           | ITRAQ4plex@N-term;<br>ITRAQ4plex(K)@7;<br>ITRAQ4plex(K)@20                     | missed K-I@7                           | -0.0341 | 2715.4355 | 679.8661 | 2715.4696 | 679.8747 | 4 | 44.06 |
| LIC13394 |      |      |                                   |                                                                                |                                        |         |           |          |           |          |   |       |
|          | 2    | 2.1  | ESAETTAGHVK                       | ITRAQ4plex@N-term;<br>ITRAQ4plex(K)@11                                         |                                        | -0.0028 | 1416.7424 | 473.2548 | 1416.7452 | 473.2557 | 3 | 25.32 |
|          | 2    | 2.1  | ESAETTAGHVKEQDT<br>LI             | ITRAQ4plex@N-term;<br>ITRAQ4plex(K)@11;<br>Deamidated(Q)@13                    | cleaved I-Q@C-term                     | -0.1110 | 2116.9624 | 706.6614 | 2117.0732 | 706.6983 | 3 | 22.34 |
|          | 2    | 2.1  | INSEFFSTLDRLR                     | ITRAQ4plex@N-term;<br>Oxidation(F)@6                                           | missed R-L@11                          | 0.0569  | 1756.9800 | 879.4973 | 1756.9230 | 879.4688 | 2 | 56.25 |
|          | 2    | 2.1  | SVGEVNRIMSEVADR<br>TNLLSLNASIEAAR | ITRAQ4plex@N-term;<br>Oxidation(M)@9                                           | missed R-I@7; missed R-T@15            | 0.2877  | 3274.9939 | 819.7557 | 3274.7061 | 819.6838 | 4 | 8.41  |
|          | 2.03 | 2.1  | TGSISHTLSK                        | ITRAQ4plex@N-term;<br>Methyl(S)@9;<br>ITRAQ4plex(K)@10                         |                                        | 0.0162  | 1331.7815 | 444.9344 | 1331.7652 | 444.9290 | 3 | 44.69 |
| LIC13363 |      |      |                                   |                                                                                |                                        |         |           |          |           |          |   |       |
|          | 2    | 5.0  | MAGAVEDTTTHNR                     | ITRAQ4plex@N-term                                                              |                                        | 0.0000  | 1545.7328 | 516.2515 | 1545.7327 | 516.2515 | 3 | 26.78 |
|          | 2    | 5.0  | RDNVSIIRIEAPK                     | ITRAQ4plex@N-term;<br>Deamidated(R)@8;<br>Oxidation(P)@12;<br>ITRAQ4plex(K)@13 | missed R-D@1; missed R-I@8             | 0.0934  | 1815.1393 | 606.0537 | 1815.0458 | 606.0225 | 3 | 37.99 |
| LIC13353 |      |      |                                   |                                                                                |                                        |         |           |          |           |          |   |       |
|          | 2    | 2.5  | INSTQQQLDR                        | ITRAQ4plex@N-term;<br>Deamidated(N)@2                                          |                                        | 0.0021  | 1475.7358 | 738.8752 | 1475.7338 | 738.8742 | 2 | 35.60 |
|          | 2    | 2.5  | IRYSRIYK                          | No ITRAQ4plex@N-term;<br>ITRAQ4plex(K)@8                                       | missed R-Y@2; missed R-I@5             | -0.0196 | 1241.7170 | 621.8658 | 1241.7366 | 621.8756 | 2 | 36.10 |
|          | 2    | 2.5  | ISLLK                             | ITRAQ4plex@N-term;<br>ITRAQ4plex(K)@5                                          | cleaved I-I@N-term; cleaved K-P@C-term | 0.0197  | 860.6136  | 431.3141 | 860.5939  | 431.3042 | 2 | 41.65 |
|          | 2    | 2.5  | LYAS                              | ITRAQ4plex@N-term                                                              | cleaved G-L@N-term; cleaved S-Y@C-term | 0.0027  | 596.3318  | 597.3391 | 596.3292  | 597.3364 | 1 | 59.75 |
|          | 2    | 2.5  | TFMLREAPWTR                       | ITRAQ4plex@N-term;<br>Oxidation(W)@10                                          | missed R-E@6                           | 0.1121  | 1680.0060 | 561.0093 | 1679.8939 | 560.9719 | 3 | 48.25 |
| LIC13348 |      |      |                                   |                                                                                |                                        |         |           |          |           |          |   |       |
|          | 2    | 2.3  | ELNPK                             | ITRAQ4plex@N-term;<br>ITRAQ4plex(K)@5                                          | cleaved F-E@N-term                     | -0.0047 | 887.5273  | 444.7709 | 887.5320  | 444.7733 | 2 | 24.69 |
|          | 2    | 2.3  | IGQNK                             | ITRAQ4plex@N-term;<br>Deamidated(Q)@3;<br>ITRAQ4plex(K)@5                      | cleaved V-I@N-term                     | 0.0044  | 847.5051  | 424.7598 | 847.5007  | 424.7576 | 2 | 23.51 |
|          | 2    | 2.3  | QDHVAGQNGVIGISLV<br>R             | Gln->pyro-Glu@N-term;<br>Deamidated(N)@8                                       |                                        | 0.0012  | 1632.8232 | 817.4189 | 1632.8220 | 817.4183 | 2 | 39.63 |





|          |       |      |                          |                                                                                                     |                                                    |         |           |          |           |          |   |       |
|----------|-------|------|--------------------------|-----------------------------------------------------------------------------------------------------|----------------------------------------------------|---------|-----------|----------|-----------|----------|---|-------|
|          | 6.11  | 7.8  | AIAEEVPKLDK              | ITRAQ4plex@N-term;<br>ITRAQ4plex(K)@8;<br>ITRAQ4plex(K)@11                                          | missed K-L@8                                       | -0.0202 | 1643.9620 | 548.9946 | 1643.9823 | 549.0014 | 3 | 43.93 |
|          | 6.11  | 7.8  | EMLIK                    | ITRAQ4plex@N-term;<br>ITRAQ4plex(K)@5                                                               |                                                    | 0.0439  | 920.6048  | 461.3097 | 920.5609  | 461.2877 | 2 | 39.50 |
|          | 6.11  | 7.8  | IYAVSSPK                 | ITRAQ4plex@N-term;<br>ITRAQ4plex(K)@8                                                               |                                                    | -0.0042 | 1151.6752 | 576.8448 | 1151.6794 | 576.8470 | 2 | 37.74 |
|          | 6.11  | 7.8  | LFLOFQGGQSPFLK           | ITRAQ4plex@N-term;<br>ITRAQ4plex(K)@14                                                              |                                                    | -3.0713 | 1822.9622 | 912.4883 | 1826.0334 | 914.0240 | 2 | 49.73 |
| LIC13316 |       |      |                          |                                                                                                     |                                                    |         |           |          |           |          |   |       |
|          | 6     | 13.9 | DGHTILLSHILPEVYK         | ITRAQ4plex@N-term;<br>ITRAQ4plex(K)@17                                                              |                                                    | 0.0055  | 2209.2405 | 553.3174 | 2209.2350 | 553.3160 | 4 | 38.61 |
|          | 1.71  | 2.6  | FLFLHQGR                 | ITRAQ4plex@N-term                                                                                   |                                                    | -0.0048 | 1160.6528 | 581.3337 | 1160.6576 | 581.3361 | 2 | 49.74 |
|          | 6     | 13.9 | IVILDEPVSGLDPK           | ITRAQ4plex@N-term;<br>ITRAQ4plex(K)@14                                                              |                                                    | 0.0053  | 1782.0436 | 892.0291 | 1782.0382 | 892.0264 | 2 | 33.70 |
|          | 1.71  | 2.6  | NLIHSLK                  | No ITRAQ4plex@N-term;<br>ITRAQ4plex(K)@7                                                            |                                                    | -0.0021 | 967.5916  | 484.8030 | 967.5936  | 484.8041 | 2 | 41.63 |
|          | 6     | 13.9 | QEVTLQIFMNQV             | ITRAQ4plex@N-term;<br>Deamidated(O)@1;<br>Deamidated(O)@7;<br>Deamidated(N)@11                      |                                                    | 0.0942  | 1724.9242 | 575.9820 | 1724.8301 | 575.9506 | 3 | 37.10 |
|          | 6     | 13.9 | VGIAQALLGNPR             | Delta:H(2)C(2)@N-term;<br>Methyl(I)@3                                                               |                                                    | -0.1012 | 1247.7249 | 624.8697 | 1247.7350 | 624.8748 | 2 | 35.71 |
|          | 6     | 13.9 | VSGLEVTLSETDVASGK        | ITRAQ4plex@N-term;<br>ITRAQ4plex(K)@17                                                              |                                                    | 0.0239  | 1979.0905 | 660.7041 | 1979.0666 | 660.6962 | 3 | 40.56 |
| LIC13314 |       |      |                          |                                                                                                     |                                                    |         |           |          |           |          |   |       |
|          | 12.73 | 8.9  | DISQNTNVDSKEEGR          | ITRAQ4plex@N-term;<br>ITRAQ4plex(K)@11                                                              |                                                    | -0.0173 | 1978.9626 | 660.6615 | 1978.9799 | 660.6673 | 3 | 25.19 |
|          | 12.73 | 8.9  | EKNLEDLER                | ITRAQ4plex@N-term;<br>ITRAQ4plex(K)@2                                                               | missed K-N@2                                       | 0.0014  | 1547.8048 | 516.9422 | 1547.8035 | 516.9418 | 3 | 30.88 |
|          | 12.73 | 8.9  | ESAAVNP                  | Glu->pyro-Glu@N-term;<br>Deamidated(N)@6;<br>ITRAQ4plex(K)@8                                        |                                                    | 0.0716  | 941.5657  | 471.7901 | 941.4940  | 471.7543 | 2 | 40.69 |
|          | 12.73 | 8.9  | FINADVELDELAEFQVSNQVILLR | ITRAQ4plex@N-term                                                                                   |                                                    | -0.0306 | 2904.5049 | 969.1756 | 2904.5355 | 969.1858 | 3 | 52.62 |
|          | 12.73 | 8.9  | GLIAFVSAAMLIQK           | ITRAQ4plex@N-term;<br>Deamidated(O)@13;<br>ITRAQ4plex(K)@14                                         | cleaved P-G@N-term                                 | -0.0173 | 1750.0133 | 584.3450 | 1750.0306 | 584.3508 | 3 | 38.50 |
|          | 12.73 | 8.9  | GPISQVQGGAGMVLAK         | ITRAQ4plex@N-term;<br>ITRAQ4plex(K)@16                                                              |                                                    | -0.0317 | 1871.0226 | 624.6815 | 1871.0542 | 624.6920 | 3 | 44.51 |
|          | 12.73 | 8.9  | GQYSFSPAIAIK             | ITRAQ4plex@N-term;<br>ITRAQ4plex(K)@11                                                              |                                                    | -0.0013 | 1455.7953 | 728.9049 | 1455.7965 | 728.9056 | 2 | 30.11 |
|          | 12.73 | 8.9  | GTENFGWLEK               | ITRAQ4plex@N-term;<br>ITRAQ4plex(K)@11                                                              |                                                    | 0.0068  | 1580.8510 | 791.4327 | 1580.8442 | 791.4294 | 2 | 35.15 |
|          | 12.73 | 8.9  | IRPDLEIYLDQLK            | ITRAQ4plex@N-term;<br>ITRAQ4plex(K)@13                                                              |                                                    | -0.0193 | 1903.0829 | 635.3682 | 1903.1022 | 635.3747 | 3 | 36.01 |
|          | 12.73 | 8.9  | ISVMR                    | No ITRAQ4plex@N-term                                                                                | cleaved Y-I@N-term                                 | 0.0196  | 604.3563  | 605.3635 | 604.3367  | 605.3439 | 1 | 56.30 |
|          | 12.73 | 8.9  | MESGGDAILDKNNNGK         | ITRAQ4plex@N-term;<br>ITRAQ4plex(K)@11;<br>ITRAQ4plex(K)@16                                         | cleaved L-M@N-term; missed K-N@11                  | 0.0598  | 2094.1340 | 699.0519 | 2094.0741 | 699.0320 | 3 | 32.72 |
|          | 12.73 | 8.9  | NNNGKLDAGEER             | ITRAQ4plex@N-term;<br>Deamidated(N)@3;<br>ITRAQ4plex(K)@5                                           | missed K-L@5                                       | 0.0158  | 1604.8156 | 535.9458 | 1604.7998 | 535.9405 | 3 | 26.21 |
|          | 12.73 | 8.9  | NVILGMVLK                | ITRAQ4plex@N-term;<br>ITRAQ4plex(K)@9                                                               |                                                    | -1.0067 | 1272.7969 | 637.4057 | 1273.8035 | 637.9091 | 2 | 55.93 |
|          | 12.73 | 8.9  | PLENSPSSEK               | ITRAQ4plex@N-term;<br>ITRAQ4plex(K)@10                                                              | cleaved R-P@N-term                                 | 0.0041  | 1374.7277 | 688.3711 | 1374.7234 | 688.3690 | 2 | 25.64 |
|          | 7.32  | 4.1  | ANSFSLR                  | ITRAQ4plex@N-term                                                                                   |                                                    | -0.0030 | 937.5074  | 469.7610 | 937.5103  | 469.7624 | 2 | 40.53 |
|          | 7.32  | 4.1  | DISQNTNVDSK              | ITRAQ4plex@N-term;<br>ITRAQ4plex(K)@11                                                              |                                                    | 0.0126  | 1507.7848 | 754.8997 | 1507.7722 | 754.8934 | 2 | 33.06 |
|          | 7.32  | 4.1  | HPIEEALTR                | CarbamyI@N-term                                                                                     |                                                    | -0.0042 | 1107.5631 | 554.7888 | 1107.5673 | 554.7909 | 2 | 39.55 |
|          | 7.32  | 4.1  | IFITIDPK                 | ITRAQ4plex@N-term;<br>ITRAQ4plex(K)@8                                                               |                                                    | 0.0004  | 1233.7581 | 617.8863 | 1233.7576 | 617.8861 | 2 | 45.40 |
|          | 7.32  | 4.1  | ILTLLK                   | ITRAQ4plex@N-term;<br>ITRAQ4plex(K)@6                                                               | cleaved L-I@N-term                                 | 0.0245  | 987.7181  | 494.8663 | 987.6936  | 494.8541 | 2 | 47.35 |
|          | 7.32  | 4.1  | SLSPQFK                  | ITRAQ4plex@N-term;<br>ITRAQ4plex(K)@7                                                               |                                                    | -0.0007 | 1093.6368 | 547.8257 | 1093.6375 | 547.8260 | 2 | 38.46 |
|          | 7.32  | 4.1  | VILLR                    | No ITRAQ4plex@N-term                                                                                | cleaved G-V@N-term                                 | 0.0072  | 612.4395  | 613.4467 | 612.4323  | 613.4396 | 1 | 49.59 |
|          | 7.32  | 4.1  | VSAAMLIQKRR              | ITRAQ4plex@N-term;<br>Deamidated(O)@8;<br>ITRAQ4plex(K)@9;<br>Deamidated(R)@10;<br>Deamidated(R)@11 | cleaved F-V@N-term; missed K-R@9;<br>missed R-R@10 | 0.0077  | 1562.9136 | 782.4641 | 1562.9058 | 782.4602 | 2 | 53.19 |
| LIC13313 |       |      |                          |                                                                                                     |                                                    |         |           |          |           |          |   |       |
|          | 6     | 9.3  | IYKSSGK                  | No ITRAQ4plex@N-term;<br>ITRAQ4plex(K)@4;<br>ITRAQ4plex(K)@8                                        | missed K-S@4                                       | 0.0469  | 1182.7686 | 592.3915 | 1182.7216 | 592.3681 | 2 | 29.53 |

|          |       |      |                    |                                                                                                      |                                          |         |           |          |           |          |   |       |
|----------|-------|------|--------------------|------------------------------------------------------------------------------------------------------|------------------------------------------|---------|-----------|----------|-----------|----------|---|-------|
|          | 6     | 9.3  | KEPVNQNDQNGLPK     | ITRAQ4plex@N-term;<br>ITRAQ4plex(K)@1;<br>Deamidated(N)@10;<br>ITRAQ4plex(K)@14                      |                                          | -0.0334 | 2013.0524 | 672.0247 | 2013.0856 | 672.0358 | 3 | 28.31 |
|          | 6     | 9.3  | LKEVVGNGLEK        | ITRAQ4plex@N-term;<br>ITRAQ4plex(K)@2;<br>ITRAQ4plex(K)@10                                           |                                          | -0.0297 | 1559.9315 | 520.9844 | 1559.9612 | 520.9943 | 3 | 33.75 |
|          | 6     | 9.3  | PNGAGYAIK          | No ITRAQ4plex@N-term;<br>Deamidated(N)@2;<br>ITRAQ4plex(K)@10                                        | cleaved D-P@N-term                       | 0.0087  | 1105.5977 | 553.8061 | 1105.5890 | 553.8018 | 2 | 28.66 |
| LIC13301 |       |      |                    |                                                                                                      |                                          |         |           |          |           |          |   |       |
|          | 3.71  | 3.6  | ANAR               | ITRAQ4plex@N-term                                                                                    | cleaved H-A@N-term                       | -0.0063 | 574.3246  | 575.3318 | 574.3309  | 575.3382 | 1 | 37.85 |
|          | 3.71  | 3.6  | DYDVAIVLGEIMK      | No ITRAQ4plex@N-term;<br>Oxidation(D)@3;<br>ITRAQ4plex(K)@14                                         |                                          | 0.0372  | 1737.9717 | 869.9931 | 1737.9345 | 869.9745 | 2 | 57.46 |
|          | 3.71  | 3.6  | FILPWTR            | ITRAQ4plex@N-term                                                                                    |                                          | 0.0087  | 1075.6388 | 538.8267 | 1075.6300 | 538.8223 | 2 | 34.97 |
|          | 5.72  | 2.4  | FMGALAEISR         | ITRAQ4plex@N-term                                                                                    |                                          | -0.0020 | 1237.6592 | 619.8369 | 1237.6611 | 619.8378 | 2 | 45.68 |
|          | 3.71  | 3.6  | GKKINTIPR          | ITRAQ4plex@N-term;<br>ITRAQ4plex(K)@2;<br>ITRAQ4plex(K)@3;<br>Oxidation(P)@8                         | missed K-K@2; missed K-I@3               | 0.1744  | 1474.1101 | 492.3773 | 1473.9357 | 492.3192 | 3 | 55.05 |
|          | 3.71  | 3.6  | GKKINTIPRLK        | No ITRAQ4plex@N-term;<br>ITRAQ4plex(K)@2;<br>ITRAQ4plex(K)@3;<br>Oxidation(N)@5;<br>ITRAQ4plex(K)@11 | missed K-K@2; missed K-I@3; missed R-L@9 | -0.0510 | 1715.0637 | 572.6952 | 1715.1147 | 572.7122 | 3 | 31.35 |
|          | 3.71  | 3.6  | GVQFPFPK           | ITRAQ4plex@N-term;<br>ITRAQ4plex(K)@8                                                                |                                          | 0.0071  | 1206.7076 | 604.3611 | 1206.7005 | 604.3575 | 2 | 32.63 |
|          | 3.71  | 3.6  | INYDNAK            | ITRAQ4plex@N-term;<br>ITRAQ4plex(K)@7                                                                |                                          | 0.0082  | 1124.6152 | 563.3149 | 1124.6070 | 563.3108 | 2 | 27.10 |
|          | 3.71  | 3.6  | IYVLGGEQTDFQR      | ITRAQ4plex@N-term                                                                                    |                                          | 0.0051  | 1668.8645 | 835.4395 | 1668.8593 | 835.4369 | 2 | 57.80 |
|          | 5.72  | 2.4  | LADVILER           | ITRAQ4plex@N-term                                                                                    |                                          | -0.0059 | 1071.6351 | 536.8248 | 1071.6410 | 536.8278 | 2 | 44.00 |
|          | 3.71  | 3.6  | MMLDLYK            | ITRAQ4plex@N-term;<br>ITRAQ4plex(K)@7                                                                |                                          | 0.1243  | 1200.7733 | 601.3939 | 1200.6490 | 601.3318 | 2 | 35.77 |
|          | 3.71  | 3.6  | QVTGTAGDYQVEGAK    | ITRAQ4plex@N-term;<br>ITRAQ4plex(K)@15                                                               |                                          | 0.0005  | 1810.9310 | 604.6509 | 1810.9305 | 604.6508 | 3 | 27.09 |
|          | 3.71  | 3.6  | SWFMNK             | ITRAQ4plex@N-term;<br>ITRAQ4plex(K)@6                                                                |                                          | 0.0199  | 1099.5928 | 550.8036 | 1099.5728 | 550.7937 | 2 | 37.26 |
|          | 3.71  | 3.6  | TFEAK              | ITRAQ4plex@N-term;<br>ITRAQ4plex(K)@5                                                                | cleaved I-T@N-term                       | -0.0540 | 882.4515  | 442.2330 | 882.5055  | 442.2600 | 2 | 28.99 |
|          | 5.72  | 2.4  | TFMSLMR            | ITRAQ4plex@N-term                                                                                    |                                          | 0.0181  | 1028.5450 | 515.2798 | 1028.5269 | 515.2707 | 2 | 45.25 |
|          | 3.71  | 3.6  | YKLPEQR            | ITRAQ4plex@N-term;<br>ITRAQ4plex(K)@2                                                                | missed K-L@2                             | -0.0127 | 1220.6993 | 407.9071 | 1220.7121 | 407.9113 | 3 | 28.97 |
| LIC13300 |       |      |                    |                                                                                                      |                                          |         |           |          |           |          |   |       |
|          | 13.72 | 18.3 | AIVDNLYEMTK        | ITRAQ4plex@N-term;<br>ITRAQ4plex(K)@11                                                               |                                          | 0.0094  | 1583.8567 | 792.9356 | 1583.8473 | 792.9309 | 2 | 33.69 |
|          | 13.72 | 18.3 | AKLPVPEVLAK        | ITRAQ4plex@N-term;<br>ITRAQ4plex(K)@2;<br>ITRAQ4plex(K)@11                                           | missed K-L@2                             | -0.0022 | 1596.0319 | 533.0179 | 1596.0340 | 533.0186 | 3 | 32.87 |
|          | 13.72 | 18.3 | AMAPLDTADFGVGLDVHK | ITRAQ4plex@N-term;<br>ITRAQ4plex(K)@17                                                               |                                          | 0.0142  | 2087.1106 | 696.7108 | 2087.0965 | 696.7061 | 3 | 34.49 |
|          | 6.93  | 8.5  | AVVYTNDTPAFAGNR    | No ITRAQ4plex@N-term;<br>Deamidated(N)@6;<br>Oxidation(P)@9                                          |                                          | 0.0056  | 1611.7585 | 806.8865 | 1611.7529 | 806.8837 | 2 | 47.80 |
|          | 13.72 | 18.3 | AVVYTNDTPAFAGNRI   | ITRAQ4plex@N-term;<br>Deamidated(N)@6                                                                | cleaved I-G@C-term; missed R-I@15        | 0.0567  | 1853.0009 | 927.5077 | 1852.9441 | 927.4793 | 2 | 38.14 |
|          | 13.72 | 18.3 | DAIQLIEK           | ITRAQ4plex@N-term;<br>ITRAQ4plex(K)@8                                                                |                                          | 0.0098  | 1216.7369 | 609.3757 | 1216.7271 | 609.3708 | 2 | 30.68 |
|          | 13.72 | 18.3 | FEIDFIR            | ITRAQ4plex@N-term                                                                                    |                                          | 0.0164  | 1082.6047 | 542.3096 | 1082.5882 | 542.3014 | 2 | 34.34 |
|          | 13.72 | 18.3 | GGIALMDAIMSGYTGR   | ITRAQ4plex@N-term                                                                                    |                                          | 0.0078  | 1755.8948 | 878.9496 | 1755.8770 | 878.9458 | 2 | 37.72 |
|          | 13.72 | 18.3 | IGFQLINEVAQI       | ITRAQ4plex@N-term                                                                                    | cleaved I-A@C-term                       | -0.0780 | 1487.7689 | 744.8917 | 1487.8470 | 744.9308 | 2 | 31.55 |
|          | 13.72 | 18.3 | IGFQLINEVAQIAEK    | ITRAQ4plex@N-term;<br>ITRAQ4plex(K)@15                                                               |                                          | -0.0062 | 1960.1174 | 654.3798 | 1960.1237 | 654.3818 | 3 | 39.25 |
|          | 13.72 | 18.3 | LDARSLFK           | ITRAQ4plex@N-term;<br>ITRAQ4plex(K)@8                                                                | missed R-S@4                             | 0.0072  | 1236.7506 | 619.3826 | 1236.7434 | 619.3790 | 2 | 56.04 |
|          | 6.93  | 8.5  | LIDKGD LGR         | ITRAQ4plex@N-term;<br>ITRAQ4plex(K)@4                                                                | missed K-G@4                             | 0.0093  | 1273.7690 | 425.5970 | 1273.7598 | 425.5939 | 3 | 41.70 |
|          | 13.72 | 18.3 | LPVPEVLAK          | ITRAQ4plex@N-term;<br>ITRAQ4plex(K)@9                                                                |                                          | 0.0027  | 1252.8026 | 627.4086 | 1252.7998 | 627.4072 | 2 | 32.13 |
|          | 13.72 | 18.3 | LVYNGADLYEVPVK     | No ITRAQ4plex@N-term;<br>Oxidation(N)@4;<br>ITRAQ4plex(K)@15                                         |                                          | 0.0152  | 1850.0099 | 617.6772 | 1849.9948 | 617.6722 | 3 | 45.66 |
|          | 13.72 | 18.3 | MILCELVSHK         | ITRAQ4plex@N-term;<br>Methylthio(C)@4;<br>ITRAQ4plex(K)@10                                           |                                          | 0.0055  | 1505.8066 | 502.9428 | 1505.8012 | 502.9410 | 3 | 36.43 |

|          |       |      |                                 |                                                                                                                          |                                        |         |           |          |           |          |   |       |
|----------|-------|------|---------------------------------|--------------------------------------------------------------------------------------------------------------------------|----------------------------------------|---------|-----------|----------|-----------|----------|---|-------|
|          | 13.72 | 18.3 | MPDYFQK                         | ITRAQ4plex@N-term;<br>ITRAQ4plex(K)@7                                                                                    |                                        | 0.0133  | 1215.6335 | 608.8240 | 1215.6202 | 608.8174 | 2 | 31.24 |
|          | 13.72 | 18.3 | PFYELKEKLDAR                    | No ITRAQ4plex@N-term;<br>ITRAQ4plex(K)@6;<br>ITRAQ4plex(K)@8                                                             | cleaved K-P@N-term; missed K-L@8       | 0.0146  | 1796.0222 | 899.0184 | 1796.0076 | 899.0111 | 2 | 54.10 |
|          | 6.93  | 8.5  | PGTIVSTVSSGLSIELR<br>SK         | ITRAQ4plex@N-term;<br>Oxidation(R)@16;<br>ITRAQ4plex(K)@19                                                               | cleaved R-P@N-term; missed R-L@16      | 0.0272  | 2234.2998 | 745.7739 | 2234.2725 | 745.7648 | 3 | 52.83 |
|          | 13.72 | 18.3 | TVTVLGANGTMGAGS<br>AAIVASFGK    | ITRAQ4plex@N-term;<br>Deamidated(N)@8;<br>ITRAQ4plex(K)@24                                                               |                                        | -0.0471 | 2468.2717 | 823.7645 | 2468.3188 | 823.7802 | 3 | 53.49 |
|          | 6.93  | 8.5  | VHMLAR                          | ITRAQ4plex@N-term                                                                                                        |                                        | -0.0003 | 869.5025  | 435.7585 | 869.5027  | 435.7586 | 2 | 38.76 |
| LIC13293 |       |      |                                 |                                                                                                                          |                                        |         |           |          |           |          |   |       |
|          | 2     | 2.3  | DILDQVIANSEPDVK                 | ITRAQ4plex@N-term;<br>Deamidated(Q)@5;<br>Deamidated(N)@9;<br>ITRAQ4plex(K)@15                                           | cleaved L-D@N-term                     | 0.0383  | 1945.0519 | 649.3579 | 1945.0135 | 649.3451 | 3 | 44.51 |
|          | 2     | 2.3  | IGGVGPGDKLEDLLK                 | ITRAQ4plex@N-term;<br>ITRAQ4plex(K)@9;<br>ITRAQ4plex(K)@15                                                               | missed K-L@9                           | -0.0034 | 1942.1431 | 648.3883 | 1942.1464 | 648.3894 | 3 | 35.05 |
|          | 2     | 2.3  | LEDLLK                          | ITRAQ4plex@N-term;<br>ITRAQ4plex(K)@6                                                                                    |                                        | 0.0108  | 1017.6422 | 509.8284 | 1017.6314 | 509.8230 | 2 | 34.58 |
|          | 2     | 2.3  | LWGQPKIQIDK                     | ITRAQ4plex@N-term;<br>Deamidated(Q)@4;<br>ITRAQ4plex(K)@7;<br>ITRAQ4plex(K)@12                                           | missed K-I@7                           | 0.0038  | 1873.0713 | 625.3644 | 1873.0675 | 625.3631 | 3 | 33.13 |
|          | 2     | 2.3  | NNTIDFDAELYAQIVR<br>QSSYQYGITLK | ITRAQ4plex@N-term;<br>Oxidation(F)@6;<br>Deamidated(Q)@13;<br>Deamidated(R)@16;<br>Deamidated(Q)@17;<br>ITRAQ4plex(K)@27 | missed R-Q@16                          | 0.0915  | 3456.8096 | 865.2097 | 3456.7180 | 865.1868 | 4 | 54.85 |
|          | 2     | 2.3  | QIVR                            | Gln->pyro-Glu@N-term                                                                                                     | cleaved A-Q@N-term                     | 0.0034  | 497.2996  | 498.3068 | 497.2962  | 498.3035 | 1 | 56.15 |
|          | 2     | 2.3  | QNVFK                           | ITRAQ4plex@N-term;<br>Deamidated(Q)@1;<br>ITRAQ4plex(K)@5                                                                |                                        | 0.0301  | 923.5621  | 462.7883 | 923.5320  | 462.7733 | 2 | 35.96 |
| LIC13268 |       |      |                                 |                                                                                                                          |                                        |         |           |          |           |          |   |       |
|          | 4     | 17.6 | ADNFYFLISHLESIK                 | ITRAQ4plex@N-term;<br>ITRAQ4plex(K)@15                                                                                   |                                        | -0.0002 | 2084.1184 | 695.7134 | 2084.1186 | 695.7135 | 3 | 39.93 |
|          | 4     | 17.6 | DTT SKPTMSAK                    | ITRAQ4plex@N-term;<br>ITRAQ4plex(K)@5;<br>ITRAQ4plex(K)@11                                                               | cleaved A-D@N-term                     | -0.0355 | 1597.8356 | 533.6191 | 1597.8711 | 533.6310 | 3 | 26.48 |
|          | 4     | 17.6 | IFPFLQK                         | ITRAQ4plex@N-term;<br>Oxidation(F)@4;<br>Deamidated(Q)@6;<br>ITRAQ4plex(K)@7                                             |                                        | 0.0156  | 1196.7205 | 599.3675 | 1196.7049 | 599.3597 | 2 | 46.97 |
| LIC13244 |       |      |                                 |                                                                                                                          |                                        |         |           |          |           |          |   |       |
|          | 18    | 26.9 | AFGH                            | ITRAQ4plex@N-term                                                                                                        | cleaved V-A@N-term; cleaved H-K@C-term | 0.0260  | 574.3246  | 575.3318 | 574.2985  | 575.3058 | 1 | 37.85 |
|          | 18    | 26.9 | AGIEYSYYLIDDAVAQL<br>MK         | ITRAQ4plex@N-term;<br>ITRAQ4plex(K)@19                                                                                   |                                        | -0.0063 | 2450.2583 | 817.7601 | 2450.2647 | 817.7622 | 3 | 41.47 |
|          | 18    | 26.9 | AIFDELAK                        | ITRAQ4plex@N-term;<br>ITRAQ4plex(K)@8                                                                                    |                                        | 0.0059  | 1193.6959 | 597.8552 | 1193.6900 | 597.8523 | 2 | 36.81 |
|          | 18    | 26.9 | ALDTFQFMEAIQK                   | ITRAQ4plex@N-term;<br>ITRAQ4plex(K)@13                                                                                   |                                        | -1.0497 | 1827.9139 | 914.9642 | 1828.9637 | 915.4891 | 2 | 42.40 |
|          | 18    | 26.9 | ALHDFEGAGVIMGQH<br>NLDK         | ITRAQ4plex@N-term;<br>ITRAQ4plex(K)@20                                                                                   |                                        | -0.0205 | 2452.2571 | 818.4263 | 2452.2776 | 818.4332 | 3 | 40.09 |
|          | 18    | 26.9 | AVIDIETSGEMTK                   | ITRAQ4plex@N-term;<br>ITRAQ4plex(K)@13                                                                                   |                                        | -0.0033 | 1680.8815 | 841.4480 | 1680.8848 | 841.4497 | 2 | 30.84 |
|          | 18    | 26.9 | DLTLLCTDSNAKALDT<br>FQFMEAIQKR  | ITRAQ4plex@N-term;<br>Methylthio(C)@6;<br>Oxidation(N)@10;<br>ITRAQ4plex(K)@12;<br>ITRAQ4plex(K)@25;<br>Oxidation(R)@26  | missed K-A@12; missed K-R@25           | 0.0391  | 3481.8013 | 871.4576 | 3481.7621 | 871.4478 | 4 | 36.46 |
|          | 18    | 26.9 | DTELYIPEAGK                     | ITRAQ4plex@N-term;<br>ITRAQ4plex(K)@11                                                                                   |                                        | -0.0146 | 1522.7977 | 762.4061 | 1522.8123 | 762.4134 | 2 | 29.80 |
|          | 18    | 26.9 | EYEAHGTVTR                      | ITRAQ4plex@N-term                                                                                                        | cleaved F-E@N-term                     | -0.0049 | 1376.6758 | 459.8992 | 1376.6806 | 459.9008 | 3 | 25.89 |
|          | 9.98  | 12.1 | FEYEAHGTVTR                     | Carbamyl@N-term                                                                                                          |                                        | 0.0517  | 1422.7045 | 712.3595 | 1422.6528 | 712.3337 | 2 | 39.60 |
|          | 18    | 26.9 | IDLWFATK                        | ITRAQ4plex@N-term;<br>ITRAQ4plex(K)@8                                                                                    |                                        | -0.0027 | 1280.7346 | 641.3746 | 1280.7372 | 641.3759 | 2 | 49.69 |
|          | 18    | 26.9 | KPITVGR                         | ITRAQ4plex@N-term;<br>ITRAQ4plex(K)@1                                                                                    |                                        | -0.0216 | 1057.6636 | 529.8391 | 1057.6851 | 529.8499 | 2 | 28.18 |
|          | 18    | 26.9 | NIPPAVR                         | ITRAQ4plex@N-term                                                                                                        |                                        | 0.0078  | 909.5596  | 455.7870 | 909.5518  | 455.7832 | 2 | 24.79 |
|          | 9.98  | 12.1 | RGELDGTDPVVAFGH<br>K            | Carbamyl@N-term;<br>ITRAQ4plex(K)@16                                                                                     | missed R-G@1                           | -0.0093 | 1883.9518 | 628.9912 | 1883.9612 | 628.9943 | 3 | 43.53 |
|          | 18    | 26.9 | SILDGTVFR                       | ITRAQ4plex@N-term                                                                                                        |                                        | 0.0006  | 1150.6475 | 576.3310 | 1150.6468 | 576.3307 | 2 | 32.72 |

|          |       |      |                                    |                                                                                                      |                                                                               |         |           |          |           |          |   |       |
|----------|-------|------|------------------------------------|------------------------------------------------------------------------------------------------------|-------------------------------------------------------------------------------|---------|-----------|----------|-----------|----------|---|-------|
|          | 18    | 26.9 | VELVYTGK                           | ITRAQ4plex@N-term;<br>ITRAQ4plex(K)@8                                                                |                                                                               | -0.0039 | 1195.7018 | 598.8582 | 1195.7056 | 598.8601 | 2 | 29.31 |
|          | 18    | 26.9 | VTVDSAHAQK                         | ITRAQ4plex@N-term;<br>ITRAQ4plex(K)@11                                                               |                                                                               | -0.0265 | 1455.8024 | 486.2747 | 1455.8289 | 486.2836 | 3 | 27.78 |
| LIC13214 |       |      |                                    |                                                                                                      |                                                                               |         |           |          |           |          |   |       |
|          | 1.73  | 4.1  | FLQEVVLK                           | ITRAQ4plex@N-term;<br>ITRAQ4plex(K)@8                                                                |                                                                               | -0.0110 | 1262.7733 | 632.3939 | 1262.7842 | 632.3994 | 2 | 44.98 |
|          | 1.73  | 4.1  | LQDFIER                            | ITRAQ4plex@N-term                                                                                    |                                                                               | 0.0098  | 1063.5883 | 532.8014 | 1063.5784 | 532.7965 | 2 | 42.99 |
| LIC13196 |       |      |                                    |                                                                                                      |                                                                               |         |           |          |           |          |   |       |
|          | 2     | 9.3  | KHKRGRNMQQDK                       | ITRAQ4plex@N-term;<br>ITRAQ4plex(K)@1;<br>ITRAQ4plex(K)@3;<br>Oxidation(N)@7;<br>ITRAQ4plex(K)@12    | cleaved S-K@N-term; missed K-H@1;<br>missed K-R@3; missed R-G@4; missed R-N@6 | 0.0223  | 2117.2312 | 706.7510 | 2117.2087 | 706.7435 | 3 | 34.70 |
|          | 2     | 9.3  | KPEGVIFGSGLYDLG<br>QTHFLSR         | ITRAQ4plex@N-term;<br>ITRAQ4plex(K)@1                                                                |                                                                               | 0.0425  | 2809.5432 | 703.3931 | 2809.5006 | 703.3824 | 4 | 40.62 |
|          | 2     | 9.3  | LSNIAGQFK                          | ITRAQ4plex@N-term;<br>Deamidated(Q)@7;<br>ITRAQ4plex(K)@9                                            |                                                                               | -0.0350 | 1265.6874 | 633.8510 | 1265.7223 | 633.8684 | 2 | 29.31 |
| LIC13183 |       |      |                                    |                                                                                                      |                                                                               |         |           |          |           |          |   |       |
|          | 4.13  | 20.5 | IENYNK                             | ITRAQ4plex@N-term;<br>ITRAQ4plex(K)@6                                                                | cleaved I-I@N-term                                                            | 0.0009  | 1067.5864 | 534.8005 | 1067.5855 | 534.8000 | 2 | 26.07 |
|          | 4.13  | 20.5 | IENYNK                             | ITRAQ4plex@N-term;<br>ITRAQ4plex(K)@7                                                                |                                                                               | -0.0058 | 1180.6638 | 591.3392 | 1180.6696 | 591.3421 | 2 | 27.99 |
|          | 4.13  | 20.5 | IPEGQIEAVK                         | ITRAQ4plex@N-term;<br>ITRAQ4plex(K)@10                                                               |                                                                               | -1.0489 | 1369.7524 | 685.8835 | 1370.8013 | 686.4079 | 2 | 29.01 |
|          | 4.13  | 20.5 | NKIPEGQIEAVK                       | ITRAQ4plex@N-term;<br>ITRAQ4plex(K)@2;<br>ITRAQ4plex(K)@12                                           | missed K-I@2                                                                  | -0.0031 | 1757.0381 | 586.6866 | 1757.0413 | 586.6877 | 3 | 30.32 |
|          | 4.13  | 20.5 | NYEETRAK                           | ITRAQ4plex@N-term;<br>Oxidation(Y)@2;<br>ITRAQ4plex(T)@5;<br>ITRAQ4plex(K)@8                         | missed R-A@6                                                                  | 0.0442  | 1457.8282 | 729.9214 | 1457.7840 | 729.8993 | 2 | 61.66 |
|          | 4.13  | 20.5 | QILDVLNAGLGLIK                     | ITRAQ4plex@N-term;<br>ITRAQ4plex(K)@14                                                               |                                                                               | 0.0123  | 1754.1031 | 585.7083 | 1754.0909 | 585.7043 | 3 | 38.95 |
|          | 4.13  | 20.5 | VINDIK                             | ITRAQ4plex@N-term;<br>ITRAQ4plex(K)@6                                                                |                                                                               | 0.0022  | 988.6183  | 495.3164 | 988.6161  | 495.3153 | 2 | 28.45 |
| LIC13176 |       |      |                                    |                                                                                                      |                                                                               |         |           |          |           |          |   |       |
|          | 2.54  | 5.4  | EGVSLPYSPIAGGVL<br>SGK             | ITRAQ4plex@N-term;<br>ITRAQ4plex(K)@19                                                               |                                                                               | -0.0180 | 2131.1953 | 711.4057 | 2131.2132 | 711.4117 | 3 | 35.34 |
|          | 2.54  | 5.4  | FAPP                               | ITRAQ4plex@N-term                                                                                    | cleaved W-F@N-term; cleaved P-V@C-term                                        | 0.0009  | 574.3246  | 575.3318 | 574.3237  | 575.3310 | 1 | 37.85 |
|          | 2.54  | 5.4  | LTELK                              | ITRAQ4plex@N-term;<br>ITRAQ4plex(K)@6                                                                | cleaved V-L@N-term                                                            | 0.0099  | 1003.6620 | 502.8383 | 1003.6521 | 502.8333 | 2 | 36.29 |
|          | 2.54  | 5.4  | RFEDALSDICK                        | ITRAQ4plex@N-term;<br>Methylthio(C)@10;<br>ITRAQ4plex(K)@11                                          | missed R-F@1                                                                  | 0.0089  | 1629.8188 | 544.2802 | 1629.8098 | 544.2772 | 3 | 38.67 |
|          | 2.54  | 5.4  | VASTIIGANTVEQLEES<br>LKAKNVILSEDVL | ITRAQ4plex@N-term;<br>Deamidated(N)@9;<br>Deamidated(Q)@13;<br>ITRAQ4plex(K)@19;<br>ITRAQ4plex(K)@21 | cleaved Y-V@N-term; cleaved L-K@C-term;<br>missed K-A@19; missed K-N@21       | -0.0501 | 3616.9529 | 905.2455 | 3617.0028 | 905.2580 | 4 | 44.13 |
| LIC13168 |       |      |                                    |                                                                                                      |                                                                               |         |           |          |           |          |   |       |
|          | 2.49  | 4.4  | FYRPTVDLIGDPAK                     | ITRAQ4plex@N-term;<br>ITRAQ4plex(K)@16                                                               |                                                                               | 0.0053  | 2121.1768 | 708.0662 | 2121.1714 | 708.0644 | 3 | 34.64 |
|          | 2.49  | 4.4  | VQAIPQTETTPFYPR                    | ITRAQ4plex@N-term                                                                                    |                                                                               | 0.0046  | 1891.0009 | 946.5077 | 1890.9961 | 946.5054 | 2 | 31.65 |
| LIC13166 |       |      |                                    |                                                                                                      |                                                                               |         |           |          |           |          |   |       |
|          | 19.51 | 33.7 | AFANNK                             | ITRAQ4plex@N-term;<br>ITRAQ4plex(K)@6                                                                |                                                                               | 0.0018  | 951.5400  | 476.7773 | 951.5381  | 476.7764 | 2 | 24.21 |
|          | 19.51 | 33.7 | AINHLDEIK                          | ITRAQ4plex@N-term;<br>ITRAQ4plex(K)@9                                                                |                                                                               | -0.0033 | 1339.7670 | 447.5963 | 1339.7703 | 447.5974 | 3 | 30.78 |
|          | 21.61 | 36.6 | AINHLDEIKNPDLR                     | Carbamyl@N-term;<br>ITRAQ4plex(K)@9                                                                  | missed K-N@9                                                                  | -0.0163 | 1833.9657 | 612.3292 | 1833.9819 | 612.3346 | 3 | 45.62 |
|          | 19.51 | 33.7 | AIQEALWK                           | ITRAQ4plex@N-term;<br>ITRAQ4plex(K)@10                                                               |                                                                               | -0.0402 | 1502.7936 | 752.4041 | 1502.8337 | 752.4241 | 2 | 30.61 |
|          | 21.61 | 36.6 | DEVISVRP                           | ITRAQ4plex@N-term                                                                                    |                                                                               | -0.0053 | 1057.5837 | 529.7991 | 1057.5890 | 529.8018 | 2 | 38.89 |
|          | 19.51 | 33.7 | DSPEYK                             | ITRAQ4plex@N-term;<br>ITRAQ4plex(K)@6                                                                |                                                                               | -0.0165 | 1025.5107 | 513.7626 | 1025.5273 | 513.7709 | 2 | 26.02 |
|          | 19.51 | 33.7 | EAIEQYR                            | ITRAQ4plex@N-term                                                                                    |                                                                               | 0.0111  | 1051.5531 | 526.7838 | 1051.5420 | 526.7783 | 2 | 26.05 |
|          | 19.51 | 33.7 | FQELHQLSK                          | ITRAQ4plex@N-term;<br>ITRAQ4plex(K)@9                                                                | cleaved N-F@N-term                                                            | -0.0020 | 1416.7948 | 473.2722 | 1416.7969 | 473.2729 | 3 | 30.42 |
|          | 19.51 | 33.7 | FRLALSNYQSGVNTIL<br>K              | No ITRAQ4plex@N-term;<br>Deamidated(R)@2;<br>Oxidation(Y)@8;<br>ITRAQ4plex(K)@17                     | missed R-L@2                                                                  | -0.0203 | 2084.1184 | 695.7134 | 2084.1388 | 695.7202 | 3 | 39.93 |

|          |      |                            |                                                                                                        |                                  |         |           |           |           |           |   |       |
|----------|------|----------------------------|--------------------------------------------------------------------------------------------------------|----------------------------------|---------|-----------|-----------|-----------|-----------|---|-------|
| 19.51    | 33.7 | GELVPEDDDKNLTEE QK         | ITRAQ4plex@N-term; ITRAQ4plex(K)@10; ITRAQ4plex(K)@17                                                  | missed K-N@10                    | -0.0150 | 2390.2029 | 797.7416  | 2390.2178 | 797.7466  | 3 | 29.34 |
| 19.51    | 33.7 | GKDSPEYKHIVNLV NK DEVISVRP | ITRAQ4plex@N-term; ITRAQ4plex(K)@2; ITRAQ4plex(K)@8; ITRAQ4plex(K)@16                                  | cleaved Y-G@N-term; missed K-H@8 | -0.0619 | 3311.8069 | 663.3687  | 3311.8689 | 663.3811  | 5 | 39.94 |
| 21.61    | 36.6 | GYDKNFQELHQLSK             | Carbamyl@N-term; ITRAQ4plex(K)@4; ITRAQ4plex(K)@14                                                     | missed K-N@4                     | 0.0099  | 2037.0623 | 680.0280  | 2037.0523 | 680.0247  | 3 | 45.46 |
| 21.61    | 36.6 | HIVNLV NK                  | ITRAQ4plex@N-term; ITRAQ4plex(K)@8                                                                     |                                  | 0.0015  | 1223.7609 | 612.8877  | 1223.7594 | 612.8870  | 2 | 42.95 |
| 19.51    | 33.7 | HIVNLV NK DEVISVRP         | ITRAQ4plex@N-term; ITRAQ4plex(K)@8                                                                     |                                  | -0.0347 | 2119.2009 | 707.4076  | 2119.2357 | 707.4192  | 3 | 42.51 |
| 19.51    | 33.7 | IDELLK                     | ITRAQ4plex@N-term; ITRAQ4plex(K)@6                                                                     |                                  | 0.0100  | 1017.6414 | 509.8280  | 1017.6314 | 509.8230  | 2 | 38.04 |
| 19.51    | 33.7 | KNVHLLRATELK               | ITRAQ4plex@N-term; ITRAQ4plex(K)@1; Deamidated(N)@2; ITRAQ4plex(K)@12                                  | missed K-N@1; missed R-A@7       | -0.0356 | 1854.1060 | 619.0426  | 1854.1416 | 619.0545  | 3 | 38.16 |
| 19.51    | 33.7 | LALS NYQSGVNTILK           | ITRAQ4plex@N-term; ITRAQ4plex(K)@15                                                                    |                                  | 0.0051  | 1908.0975 | 955.0560  | 1908.0924 | 955.0535  | 2 | 32.76 |
| 21.61    | 36.6 | LLSDTYR                    | ITRAQ4plex@N-term                                                                                      |                                  | -0.0006 | 1010.5513 | 506.2829  | 1010.5518 | 506.2832  | 2 | 41.14 |
| 19.51    | 33.7 | NFQELHQLSK                 | ITRAQ4plex@N-term; ITRAQ4plex(K)@10                                                                    |                                  | 0.0159  | 1530.8557 | 511.2925  | 1530.8398 | 511.2872  | 3 | 42.29 |
| 19.51    | 33.7 | NPDLRERPEFK                | ITRAQ4plex@N-term; Deamidated(N)@1; Deamidated(R)@5; Deamidated(R)@7; Oxidation(P)@8; ITRAQ4plex(K)@11 | missed R-E@5                     | 0.0772  | 1706.9491 | 854.4818  | 1706.8719 | 854.4432  | 2 | 41.14 |
| 19.51    | 33.7 | NVHLLR                     | ITRAQ4plex@N-term                                                                                      |                                  | 0.0010  | 894.5532  | 448.2838  | 894.5521  | 448.2833  | 2 | 26.98 |
| 19.51    | 33.7 | QALNYFTK                   | ITRAQ4plex@N-term; ITRAQ4plex(K)@8                                                                     | cleaved Q-Q@N-term               | -0.0029 | 1271.7089 | 636.8617  | 1271.7118 | 636.8632  | 2 | 30.76 |
| 19.51    | 33.7 | QELHQLSK                   | ITRAQ4plex@N-term; ITRAQ4plex(K)@8                                                                     | cleaved F-Q@N-term               | -0.0100 | 1269.7185 | 424.2468  | 1269.7285 | 424.2501  | 3 | 28.03 |
| 19.51    | 33.7 | QEQEALWK                   | Gln->pyro-Glu@N-term; ITRAQ4plex(K)@8                                                                  | cleaved I-Q@N-term               | -0.0080 | 1157.5759 | 579.7952  | 1157.5839 | 579.7992  | 2 | 40.16 |
| 19.51    | 33.7 | QQALNYFTK                  | ITRAQ4plex@N-term; ITRAQ4plex(K)@9                                                                     |                                  | -0.0280 | 1399.7423 | 700.8784  | 1399.7703 | 700.8924  | 2 | 29.99 |
| 19.51    | 33.7 | QQNNOGGNQANES VEK          | Gln->pyro-Glu@N-term; Deamidated(N)@4; ITRAQ4plex(K)@17                                                | cleaved A-Q@N-term               | 0.0002  | 1999.8955 | 1000.9550 | 1999.8953 | 1000.9549 | 2 | 27.74 |
| 21.61    | 36.6 | RLLSDTYR                   | Carbamyl@N-term                                                                                        | missed R-L@1                     | -0.0030 | 1065.5537 | 533.7841  | 1065.5567 | 533.7856  | 2 | 39.86 |
| 21.61    | 36.6 | YGKDSPEYK                  | Carbamyl@N-term; ITRAQ4plex(K)@3; ITRAQ4plex(K)@9                                                      |                                  | -0.0060 | 1416.7069 | 709.3607  | 1416.7129 | 709.3637  | 2 | 36.36 |
| 19.51    | 33.7 | YLASCYAFEENMIK             | ITRAQ4plex@N-term; Methythio(C)@5; ITRAQ4plex(K)@14                                                    |                                  | -0.9330 | 2014.0117 | 1008.0130 | 2014.9446 | 1008.4796 | 2 | 57.41 |
| 19.51    | 33.7 | YWQK                       | ITRAQ4plex@N-term; ITRAQ4plex(K)@4                                                                     | cleaved W-Y@N-term               | -0.0019 | 911.5090  | 456.7618  | 911.5109  | 456.7627  | 2 | 28.91 |
| LIC13128 |      |                            |                                                                                                        |                                  |         |           |           |           |           |   |       |
| 5.4      | 22.5 | EKEFLDDLAK                 | ITRAQ4plex@N-term; ITRAQ4plex(K)@2; ITRAQ4plex(K)@10                                                   |                                  | -0.0294 | 1638.8900 | 547.3040  | 1638.9194 | 547.3137  | 3 | 34.92 |
| 5.4      | 22.5 | ELEISSMDKK                 | ITRAQ4plex@N-term; ITRAQ4plex(K)@9; ITRAQ4plex(K)@10                                                   | missed K-K@9                     | -0.0345 | 1610.8569 | 537.9596  | 1610.8915 | 537.9711  | 3 | 31.40 |
| 5.4      | 22.5 | ENLSSLASK                  | ITRAQ4plex@N-term; ITRAQ4plex(S)@5; ITRAQ4plex(K)@9                                                    | cleaved M-E@N-term               | -0.0057 | 1379.7928 | 690.9037  | 1379.7986 | 690.9066  | 2 | 45.08 |
| 5.4      | 22.5 | TSIIGELSEVFENPLV K         | ITRAQ4plex@N-term; ITRAQ4plex(K)@18                                                                    |                                  | -0.0312 | 2259.2295 | 754.0837  | 2259.2606 | 754.0941  | 3 | 1.74  |
| 5.4      | 22.5 | VLPGHEFYEK                 | ITRAQ4plex@N-term; ITRAQ4plex(K)@10                                                                    |                                  | -0.0012 | 1505.8110 | 502.9443  | 1505.8122 | 502.9447  | 3 | 37.05 |
| LIC13123 |      |                            |                                                                                                        |                                  |         |           |           |           |           |   |       |
| 16.4     | 32.3 | AAILNAIVNIMK               | ITRAQ4plex@N-term; ITRAQ4plex(K)@12                                                                    |                                  | -0.0073 | 1557.9447 | 779.9796  | 1557.9520 | 779.9833  | 2 | 38.72 |
| 8.92     | 14.4 | AYFEQIR                    | ITRAQ4plex@N-term                                                                                      |                                  | 0.0037  | 1069.5715 | 535.7930  | 1069.5678 | 535.7912  | 2 | 40.86 |
| 16.4     | 32.3 | DLASVLGFK                  | ITRAQ4plex@N-term; ITRAQ4plex(K)@9                                                                     |                                  | 0.0084  | 1236.7406 | 619.3776  | 1236.7322 | 619.3734  | 2 | 42.88 |
| 16.4     | 32.3 | EDYTMVIAAGEILR             | ITRAQ4plex@N-term                                                                                      |                                  | 0.0098  | 1723.9036 | 862.9590  | 1723.8937 | 862.9541  | 2 | 56.12 |
| 16.4     | 32.3 | FTVAQALAVIDH               | ITRAQ4plex@N-term                                                                                      | cleaved H-V@C-term               | 0.0510  | 1427.8405 | 714.9275  | 1427.7894 | 714.9020  | 2 | 49.92 |
| 16.4     | 32.3 | FTVAQALAVIDH VDAIK PTIEEYK | ITRAQ4plex@N-term; ITRAQ4plex(K)@17; ITRAQ4plex(K)@24                                                  |                                  | -1.0505 | 3101.6826 | 776.4279  | 3102.7331 | 776.6905  | 4 | 42.37 |

|          |       |      |                                 |                                                                                                          |                                                      |         |           |          |           |          |   |       |
|----------|-------|------|---------------------------------|----------------------------------------------------------------------------------------------------------|------------------------------------------------------|---------|-----------|----------|-----------|----------|---|-------|
|          | 8.92  | 14.4 | INALR                           | ITRAQ4plex@N-term                                                                                        | cleaved L-I@N-term                                   | -0.0494 | 729.4125  | 730.4197 | 729.4619  | 730.4692 | 1 | 56.27 |
|          | 16.4  | 32.3 | INALRGNP                        | No ITRAQ4plex@N-term                                                                                     | cleaved L-I@N-term; cleaved P-K@C-term; missed R-G@5 | 0.0583  | 853.5353  | 427.7749 | 853.4770  | 427.7458 | 2 | 31.49 |
|          | 16.4  | 32.3 | KDLASVLFK                       | ITRAQ4plex@N-term; ITRAQ4plex(K)@1; ITRAQ4plex(K)@10                                                     |                                                      | -0.0497 | 1508.8795 | 503.9671 | 1508.9292 | 503.9837 | 3 | 39.42 |
|          | 16.4  | 32.3 | KETVNFVSTLEK                    | ITRAQ4plex@N-term; ITRAQ4plex(K)@1; ITRAQ4plex(K)@13                                                     |                                                      | 0.0024  | 1939.1379 | 647.3866 | 1939.1355 | 647.3858 | 3 | 38.19 |
|          | 16.4  | 32.3 | LAVRPLINALR                     | ITRAQ4plex@N-term                                                                                        |                                                      | -0.0053 | 1378.8842 | 460.6353 | 1378.8894 | 460.6371 | 3 | 33.74 |
|          | 8.92  | 14.4 | PTIEEYK                         | ITRAQ4plex@N-term; ITRAQ4plex(K)@7                                                                       | cleaved K-P@N-term                                   | 0.0383  | 1166.6809 | 584.3477 | 1166.6427 | 584.3286 | 2 | 57.79 |
|          | 8.92  | 14.4 | PYLK                            | ITRAQ4plex@N-term; ITRAQ4plex(K)@4                                                                       | cleaved H-P@N-term                                   | 0.0470  | 807.5569  | 404.7857 | 807.5098  | 404.7622 | 2 | 41.44 |
|          | 16.4  | 32.3 | RASAADGLKYMNR                   | ITRAQ4plex@N-term; ITRAQ4plex(K)@9                                                                       | cleaved I-R@N-term; missed R-A@1; missed K-Y@9       | 0.0346  | 1739.9690 | 580.9969 | 1739.9345 | 580.9854 | 3 | 48.94 |
|          | 16.4  | 32.3 | SFYSLCDMLK                      | ITRAQ4plex@N-term; Methylthio(C)@6; ITRAQ4plex(K)@10                                                     |                                                      | 0.0093  | 1539.7473 | 770.8809 | 1539.7379 | 770.8762 | 2 | 38.61 |
|          | 16.4  | 32.3 | SLENHPLYK                       | ITRAQ4plex@N-term; Deamidated(N)@4; ITRAQ4plex(K)@9                                                      |                                                      | 0.0321  | 1388.7865 | 463.9361 | 1388.7543 | 463.9254 | 3 | 45.56 |
|          | 16.4  | 32.3 | TSMALGEVDLK                     | ITRAQ4plex@N-term; ITRAQ4plex(K)@11                                                                      |                                                      | 1.0043  | 1451.7988 | 726.9067 | 1450.7945 | 726.4045 | 2 | 30.63 |
|          | 16.4  | 32.3 | VDAADYK                         | ITRAQ4plex@N-term; ITRAQ4plex(K)@8                                                                       |                                                      | 0.0162  | 1181.6698 | 591.8422 | 1181.6536 | 591.8341 | 2 | 32.64 |
| LIC13092 |       |      |                                 |                                                                                                          |                                                      |         |           |          |           |          |   |       |
|          | 2     | 3.8  | DSTPEEDEMIIQK                   | ITRAQ4plex@N-term; ITRAQ4plex(K)@12                                                                      |                                                      | -0.0009 | 1708.8060 | 855.4103 | 1708.8069 | 855.4107 | 2 | 28.08 |
|          | 2     | 3.8  | GILIEINSPGTVGASQ<br>EYVYNELMR   | ITRAQ4plex@N-term                                                                                        |                                                      | -0.0157 | 2790.4187 | 931.1469 | 2790.4344 | 931.1521 | 3 | 43.03 |
|          | 2     | 3.8  | QKLRDIEQNPNIK                   | ITRAQ4plex@N-term; Deamidated(Q)@1; ITRAQ4plex(K)@2; ITRAQ4plex(K)@13                                    | cleaved L-Q@N-term; missed K-L@2; missed R-D@4       | -0.0552 | 2028.1140 | 677.0453 | 2028.1693 | 677.0637 | 3 | 44.15 |
| LIC13088 |       |      |                                 |                                                                                                          |                                                      |         |           |          |           |          |   |       |
|          | 2     | 9.9  | LDLH                            | ITRAQ4plex@N-term                                                                                        | cleaved H-K@C-term                                   | -0.0038 | 640.3628  | 641.3701 | 640.3666  | 641.3739 | 1 | 56.98 |
|          | 2     | 4.5  | LNPDLVI                         | ITRAQ4plex@N-term                                                                                        | cleaved I-T@C-term                                   | -0.0406 | 926.5153  | 464.2649 | 926.5559  | 464.2852 | 2 | 42.95 |
|          | 2     | 9.9  | LNPDLVITDISMPGLS<br>GIDLVK      | ITRAQ4plex@N-term; ITRAQ4plex(K)@22                                                                      |                                                      | -0.0212 | 2597.4382 | 866.8200 | 2597.4594 | 866.8271 | 3 | 38.81 |
|          | 2     | 4.5  | VADLVMYAIR                      | ITRAQ4plex@N-term                                                                                        |                                                      | 0.0075  | 1293.7312 | 647.8729 | 1293.7237 | 647.8691 | 2 | 48.58 |
| LIC13071 |       |      |                                 |                                                                                                          |                                                      |         |           |          |           |          |   |       |
|          | 3.41  | 9.4  | EAQILAK                         | ITRAQ4plex@N-term; Deamidated(Q)@3; ITRAQ4plex(K)@7                                                      | cleaved G-E@N-term                                   | 0.0059  | 1060.6431 | 531.3288 | 1060.6372 | 531.3259 | 2 | 38.38 |
|          | 3.41  | 9.4  | IGEAQILAK                       | ITRAQ4plex@N-term; ITRAQ4plex(K)@9                                                                       |                                                      | -0.0083 | 1229.7504 | 615.8824 | 1229.7587 | 615.8866 | 2 | 41.02 |
|          | 3.41  | 9.4  | LIAN                            | No ITRAQ4plex@N-term                                                                                     | cleaved N-E@C-term                                   | 0.0770  | 429.3357  | 430.3430 | 429.2587  | 430.2660 | 1 | 58.43 |
|          | 3.41  | 9.4  | SPELTSVK                        | ITRAQ4plex@N-term; ITRAQ4plex(K)@8                                                                       |                                                      | -0.0002 | 1147.6691 | 574.8418 | 1147.6692 | 574.8419 | 2 | 36.81 |
| LIC10431 |       |      |                                 |                                                                                                          |                                                      |         |           |          |           |          |   |       |
|          | 2     | 7.0  | PLGR                            | No ITRAQ4plex@N-term                                                                                     | cleaved L-P@N-term                                   | -0.0113 | 441.2587  | 442.2660 | 441.2700  | 442.2772 | 1 | 60.44 |
|          | 2     | 7.0  | SISLGDIDDVIEK                   | ITRAQ4plex@N-term; ITRAQ4plex(K)@13                                                                      |                                                      | -0.0032 | 1690.9200 | 846.4673 | 1690.9233 | 846.4689 | 2 | 34.11 |
|          | 2     | 7.0  | SLIQINDAEAAIR                   | ITRAQ4plex@N-term; Deamidated(Q)@4                                                                       | cleaved L-S@N-term                                   | 0.0212  | 1670.9537 | 836.4841 | 1670.9325 | 836.4735 | 2 | 46.03 |
| LIC10432 |       |      |                                 |                                                                                                          |                                                      |         |           |          |           |          |   |       |
|          | 11.56 | 12.4 | ADVLPALLRPGK                    | ITRAQ4plex@N-term                                                                                        |                                                      | -0.0039 | 1535.8866 | 512.9695 | 1535.8906 | 512.9708 | 3 | 44.30 |
|          | 4.12  | 4.3  | AFSFGK                          | ITRAQ4plex@N-term; ITRAQ4plex(K)@6                                                                       |                                                      | -0.0051 | 943.5320  | 472.7733 | 943.5371  | 472.7758 | 2 | 41.79 |
|          | 11.56 | 12.4 | DISYSDFLNMLEPVEG<br>K           | ITRAQ4plex@N-term; ITRAQ4plex(K)@17                                                                      |                                                      | -0.0035 | 2244.1194 | 749.0471 | 2244.1228 | 749.0482 | 3 | 38.01 |
|          | 11.56 | 12.4 | DLFDQGGKKNSPCIIFID<br>EIDAVGRLR | ITRAQ4plex@N-term; ITRAQ4plex(K)@7; ITRAQ4plex(K)@8; Methylthio(C)@12; Oxidation(D)@17; Deamidated(R)@24 | missed K-K@7; missed K-N@8; missed R-L@24            | 0.0559  | 3456.8669 | 865.2240 | 3456.8111 | 865.2100 | 4 | 51.11 |
|          | 11.56 | 12.4 | EIIIEFLK                        | ITRAQ4plex@N-term; ITRAQ4plex(K)@7                                                                       | cleaved V-E@N-term                                   | 0.0070  | 1178.7224 | 590.3685 | 1178.7154 | 590.3650 | 2 | 44.28 |
|          | 11.56 | 12.4 | EQTLNQLVEMDGFE<br>K             | ITRAQ4plex@N-term; ITRAQ4plex(K)@16                                                                      |                                                      | 0.0462  | 2199.1257 | 734.0492 | 2199.0795 | 734.0338 | 3 | 36.00 |
|          | 11.56 | 12.4 | EQTLNQLVEMDGFE<br>KNEGVIVMAATNR | ITRAQ4plex@N-term; ITRAQ4plex(K)@16                                                                      | missed K-N@16                                        | 0.0404  | 3454.7542 | 864.6958 | 3454.7138 | 864.6857 | 4 | 48.08 |
|          | 11.56 | 12.4 | GAGLGGGHDNR                     | ITRAQ4plex@N-term                                                                                        |                                                      | -0.0187 | 1168.5520 | 585.2833 | 1168.5707 | 585.2926 | 2 | 30.00 |
|          | 11.56 | 12.4 | GTPGFTGADLANLINE<br>GALLAAR     | ITRAQ4plex@N-term                                                                                        |                                                      | 0.0111  | 2385.2886 | 796.1035 | 2385.2774 | 796.0997 | 3 | 40.92 |

|          |       |      |                    |                                                                               |                                                         |         |           |          |           |          |   |       |
|----------|-------|------|--------------------|-------------------------------------------------------------------------------|---------------------------------------------------------|---------|-----------|----------|-----------|----------|---|-------|
|          | 11.56 | 12.4 | INEGALLAARK        | ITRAQ4plex@N-term;<br>Oxidation(N)@2;<br>ITRAQ4plex(K)@11                     | cleaved L-I@N-term; missed R-K@10                       | 0.0216  | 1458.8978 | 730.4562 | 1458.8762 | 730.4454 | 2 | 53.27 |
|          | 11.56 | 12.4 | IPTGVLLVPPGTGKTLAR | No ITRAQ4plex@N-term;<br>Oxidation(P)@11;<br>ITRAQ4plex(K)@15                 | missed K-T@15                                           | -0.1226 | 2119.1626 | 707.3948 | 2119.2851 | 707.4356 | 3 | 40.14 |
|          | 11.56 | 12.4 | LDPALLR            | ITRAQ4plex@N-term                                                             | cleaved V-L@N-term; cleaved R-P@C-term                  | -0.0016 | 940.5812  | 471.2979 | 940.5828  | 471.2987 | 2 | 54.11 |
|          | 11.56 | 12.4 | LGTVNYSGDQANVFIGR  | ITRAQ4plex@N-term;<br>Oxidation(N)@5; Oxidation(D)@9                          |                                                         | 0.0473  | 1986.0402 | 994.0273 | 1985.9929 | 994.0037 | 2 | 54.81 |
|          | 4.12  | 4.3  | PTGVLLVGPP         | No ITRAQ4plex@N-term                                                          | cleaved I-P@N-term; cleaved P-G@C-term                  | 0.0262  | 948.5906  | 475.3026 | 948.5644  | 475.2895 | 2 | 45.32 |
|          | 11.56 | 12.4 | PVKFRRTVAPLKD      | ITRAQ4plex@N-term;<br>ITRAQ4plex(K)@3;<br>ITRAQ4plex(K)@13                    | cleaved K-P@N-term; missed K-F@3;<br>missed R-T@5       | -0.0725 | 1903.0895 | 635.3704 | 1903.1620 | 635.3946 | 3 | 46.03 |
|          | 11.56 | 12.4 | QIQSTGNK           | ITRAQ4plex@N-term;<br>Deamidated(O)@1;<br>Deamidated(O)@3;<br>ITRAQ4plex(K)@8 |                                                         | 0.0330  | 1164.6560 | 583.3353 | 1164.6230 | 583.3188 | 2 | 27.00 |
|          | 11.56 | 12.4 | RVTQEELEEAR        | ITRAQ4plex@N-term                                                             | missed R-V@1                                            | -0.0037 | 1502.7773 | 501.9331 | 1502.7811 | 501.9343 | 3 | 28.07 |
|          | 11.56 | 12.4 | SFFISEK            | ITRAQ4plex@N-term;<br>ITRAQ4plex(K)@7                                         |                                                         | -0.0034 | 1144.6338 | 573.3242 | 1144.6372 | 573.3259 | 2 | 35.67 |
|          | 4.12  | 4.3  | SPCIIFIDEIDAVGR    | ITRAQ4plex@N-term;<br>Dehydrated(S)@1;<br>Methylthio(C)@3                     | cleaved N-S@N-term                                      | -0.0290 | 1818.8840 | 910.4493 | 1818.9130 | 910.4638 | 2 | 57.02 |
|          | 11.56 | 12.4 | TNPAYNAGME         | ITRAQ4plex@N-term                                                             |                                                         | 0.0064  | 1210.5475 | 606.2810 | 1210.5410 | 606.2778 | 2 | 35.76 |
|          | 11.56 | 12.4 | TTVAPLKDLISSLR     | ITRAQ4plex@N-term;<br>ITRAQ4plex(K)@8                                         |                                                         | 0.0121  | 1916.1307 | 639.7175 | 1916.1186 | 639.7135 | 3 | 34.18 |
|          | 11.56 | 12.4 | VTQEELEEAR         | ITRAQ4plex@N-term                                                             |                                                         | -0.0169 | 1346.6631 | 674.3388 | 1346.6800 | 674.3473 | 2 | 27.97 |
| LIC10440 |       |      |                    |                                                                               |                                                         |         |           |          |           |          |   |       |
|          | 2     | 9.6  | IFITPLEDVIR        | ITRAQ4plex@N-term                                                             |                                                         | -0.0028 | 1458.8540 | 730.4343 | 1458.8568 | 730.4357 | 2 | 36.53 |
|          | 2.08  | 9.6  | LIVAIQPHK          | ITRAQ4plex@N-term;<br>ITRAQ4plex(K)@10                                        |                                                         | -0.0682 | 1418.8535 | 710.4340 | 1418.9217 | 710.4681 | 2 | 50.01 |
|          | 2.08  | 9.6  | RLTVS              | No ITRAQ4plex@N-term                                                          | cleaved Y-R@N-term; cleaved S-D@C-term;<br>missed R-L@1 | 0.1572  | 574.5010  | 575.5083 | 574.3439  | 575.3511 | 1 | 59.56 |
| LIC10441 |       |      |                    |                                                                               |                                                         |         |           |          |           |          |   |       |
|          | 2     | 3.0  | EITGLDSEIHGEK      | ITRAQ4plex@N-term;<br>ITRAQ4plex(K)@13                                        |                                                         | -0.0033 | 1714.8948 | 572.6389 | 1714.8981 | 572.6400 | 3 | 30.05 |
|          | 2     | 3.0  | LLLLL              | ITRAQ4plex@N-term                                                             | cleaved L-T@C-term                                      | 0.0124  | 727.5453  | 728.5526 | 727.5329  | 728.5402 | 1 | 55.80 |
| LIC10452 |       |      |                    |                                                                               |                                                         |         |           |          |           |          |   |       |
|          | 2.21  | 0.0  | AIYCILR            | ITRAQ4plex@N-term;<br>Methylthio(C)@4                                         |                                                         | 0.0220  | 1040.5853 | 521.2999 | 1040.5633 | 521.2889 | 2 | 47.35 |
|          | 2     | 3.9  | DLLQTPAFK          | ITRAQ4plex@N-term;<br>ITRAQ4plex(K)@9                                         |                                                         | -0.0031 | 1319.7662 | 660.8904 | 1319.7693 | 660.8919 | 2 | 31.04 |
|          | 2.21  | 0.0  | FGFEPEITAK         | Carbamyl@N-term;<br>ITRAQ4plex(K)@10                                          |                                                         | 0.0058  | 1324.6843 | 663.3494 | 1324.6785 | 663.3465 | 2 | 46.72 |
|          | 2.21  | 0.0  | ITAK               | ITRAQ4plex@N-term;<br>ITRAQ4plex(K)@4                                         | cleaved E-I@N-term                                      | 0.0116  | 719.4901  | 720.4974 | 719.4785  | 720.4858 | 1 | 58.63 |
|          | 2     | 3.9  | SIVIFCYNEKNTIR     | ITRAQ4plex@N-term;<br>Methylthio(C)@6;<br>ITRAQ4plex(K)@10                    | cleaved V-S@N-term; missed K-N@10                       | -0.0741 | 1982.9784 | 992.4965 | 1983.0525 | 992.5335 | 2 | 59.03 |
|          | 2     | 3.9  | VIVQ               | No ITRAQ4plex@N-term                                                          | cleaved I-V@N-term; cleaved Q-D@C-term                  | -0.0344 | 457.2557  | 458.2630 | 457.2900  | 458.2973 | 1 | 0.29  |
|          | 2.21  | 0.0  | VVYYWHR            | ITRAQ4plex@N-term                                                             |                                                         | 0.0003  | 1165.6158 | 583.8152 | 1165.6154 | 583.8150 | 2 | 44.13 |
| LIC10483 |       |      |                    |                                                                               |                                                         |         |           |          |           |          |   |       |
|          | 4.01  | 7.6  | ALDVFPGTHTLK       | ITRAQ4plex@N-term;<br>ITRAQ4plex(K)@13                                        |                                                         | 0.0041  | 1642.9329 | 548.6516 | 1642.9286 | 548.6502 | 3 | 32.14 |
|          | 5.55  | 10.3 | ALIDVIK            | ITRAQ4plex@N-term;<br>ITRAQ4plex(K)@7                                         | cleaved M-A@N-term                                      | 0.0026  | 1058.6969 | 530.3557 | 1058.6943 | 530.3544 | 2 | 44.46 |
|          | 4.01  | 7.6  | DVFGPGTHTLK        | ITRAQ4plex@N-term;<br>ITRAQ4plex(K)@11                                        | cleaved L-D@N-term                                      | 0.0207  | 1458.8281 | 487.2833 | 1458.8074 | 487.2764 | 3 | 37.75 |
|          | 5.55  | 10.3 | LLKPMVVTR          | ITRAQ4plex@N-term;<br>ITRAQ4plex(K)@3                                         |                                                         | -0.0078 | 1343.8488 | 448.9569 | 1343.8566 | 448.9595 | 3 | 44.28 |
|          | 4.01  | 7.6  | QPGE               | No ITRAQ4plex@N-term                                                          | cleaved G-Q@N-term; cleaved E-I@C-term                  | 0.0265  | 429.2125  | 430.2198 | 429.1860  | 430.1932 | 1 | 4.73  |
|          | 4.01  | 7.6  | SFVNTVVGTHQHK      | ITRAQ4plex@N-term;<br>ITRAQ4plex(K)@12                                        |                                                         | -0.0148 | 1603.8777 | 535.6332 | 1603.8926 | 535.6381 | 3 | 29.97 |
| LIC10484 |       |      |                    |                                                                               |                                                         |         |           |          |           |          |   |       |
|          | 4     | 6.7  | AGIPAIIFLPAGK      | ITRAQ4plex@N-term;<br>ITRAQ4plex(K)@13                                        |                                                         | -0.0005 | 1554.9736 | 778.4941 | 1554.9741 | 778.4943 | 2 | 48.83 |
|          | 4     | 6.7  | EWVLPHIEDK         | ITRAQ4plex@N-term;<br>ITRAQ4plex(K)@10                                        |                                                         | 0.0189  | 1552.8682 | 518.6300 | 1552.8493 | 518.6237 | 3 | 47.84 |
|          | 4     | 6.7  | GLIR               | ITRAQ4plex@N-term                                                             | cleaved V-G@N-term                                      | 0.0481  | 601.4515  | 602.4587 | 601.4033  | 602.4106 | 1 | 53.83 |
|          | 4     | 6.7  | LDALK              | ITRAQ4plex@N-term;<br>ITRAQ4plex(K)@5                                         | cleaved D-L@N-term                                      | 0.0156  | 846.5574  | 424.2860 | 846.5418  | 424.2782 | 2 | 42.94 |

|          |      |      |                                  |                                                                                                                            |                                                           |         |           |           |           |           |   |       |
|----------|------|------|----------------------------------|----------------------------------------------------------------------------------------------------------------------------|-----------------------------------------------------------|---------|-----------|-----------|-----------|-----------|---|-------|
|          | 4    | 6.7  | NIVTSGEGLTHLFTSDR                | Carbamyl@N-term                                                                                                            |                                                           | 0.0351  | 1888.9630 | 945.4888  | 1888.9279 | 945.4712  | 2 | 48.36 |
| LIC10486 |      |      |                                  |                                                                                                                            |                                                           |         |           |           |           |           |   |       |
|          | 3.15 | 4.5  | GPSGVLLQAFEERPVR                 | Carbamyl@N-term                                                                                                            |                                                           | 0.0275  | 1796.9808 | 899.4977  | 1796.9533 | 899.4839  | 2 | 48.45 |
|          | 3.15 | 4.5  | IDIENRSGAVVALVTK                 | ITRAQ4plex@N-term; Deamidated(R)@6; ITRAQ4plex(K)@16                                                                       | missed R-S@6                                              | 0.0080  | 1973.1482 | 658.7233  | 1973.1401 | 658.7206  | 3 | 59.50 |
|          | 2.03 | 5.3  | IRIDIENR                         | No ITRAQ4plex@N-term                                                                                                       | missed R-I@2                                              | 0.0034  | 1027.5809 | 514.7977  | 1027.5774 | 514.7960  | 2 | 32.41 |
|          | 3.15 | 4.5  | MEPSNQVNK                        | ITRAQ4plex@N-term; ITRAQ4plex(K)@9                                                                                         |                                                           | 0.0054  | 1333.6958 | 667.8552  | 1333.6904 | 667.8525  | 2 | 32.94 |
|          | 2.03 | 5.3  | SEPYDPGLSDSIGR                   | ITRAQ4plex@N-term                                                                                                          |                                                           | 0.0241  | 1635.8103 | 818.9124  | 1635.7862 | 818.9004  | 2 | 29.47 |
|          | 2.03 | 5.3  | SGAVVALVTK                       | No ITRAQ4plex@N-term; ITRAQ4plex(K)@10                                                                                     |                                                           | 0.0469  | 1087.7192 | 544.8669  | 1087.6723 | 544.8434  | 2 | 32.80 |
|          | 2.03 | 5.3  | TVLAPVGGVDFDELTEGDR              | ITRAQ4plex@N-term                                                                                                          |                                                           | 0.0066  | 2133.0779 | 712.0332  | 2133.0712 | 712.0310  | 3 | 36.67 |
| LIC10522 |      |      |                                  |                                                                                                                            |                                                           |         |           |           |           |           |   |       |
|          | 2.3  | 3.4  | IVKDPLIESR                       | ITRAQ4plex@N-term; ITRAQ4plex(K)@3                                                                                         |                                                           | -0.0406 | 1569.9292 | 524.3170  | 1569.9698 | 524.3305  | 3 | 45.08 |
|          | 2.3  | 3.4  | YRQESIVEK                        | ITRAQ4plex@N-term; ITRAQ4plex(K)@9                                                                                         | missed R-Q@2                                              | 0.0073  | 1438.8097 | 480.6105  | 1438.8024 | 480.6081  | 3 | 39.47 |
| LIC10538 |      |      |                                  |                                                                                                                            |                                                           |         |           |           |           |           |   |       |
|          | 6    | 8.1  | DAIYSKPEMSDEDGIR                 | ITRAQ4plex@N-term; ITRAQ4plex(K)@6                                                                                         |                                                           | 0.0011  | 2113.0254 | 705.3491  | 2113.0241 | 705.3486  | 3 | 30.21 |
|          | 6    | 8.1  | DVILAENISKSYDRPIFK               | ITRAQ4plex@N-term; ITRAQ4plex(K)@10; Oxidation(D)@13; Oxidation(R)@14; ITRAQ4plex(K)@18                                    | missed K-S@10                                             | -0.0882 | 2571.3394 | 858.1204  | 2571.4274 | 858.1497  | 3 | 14.55 |
|          | 6    | 8.1  | EGILEDADTLVDWLYR                 | ITRAQ4plex@N-term                                                                                                          |                                                           | 0.0010  | 2051.0342 | 1026.5240 | 2051.0333 | 1026.5239 | 2 | 40.78 |
|          | 6    | 8.1  | IISGDNLLALDEPTNHLDELET           | ITRAQ4plex@N-term; Deamidated(N)@6                                                                                         | cleaved M-I@N-term; cleaved I-E@C-term                    | -0.0399 | 2550.2788 | 638.5770  | 2550.3187 | 638.5869  | 4 | 42.09 |
|          | 6    | 8.1  | YADPGTEMEIR                      | ITRAQ4plex@N-term                                                                                                          |                                                           | 0.0163  | 1553.7317 | 777.8731  | 1553.7154 | 777.8650  | 2 | 30.03 |
| LIC10548 |      |      |                                  |                                                                                                                            |                                                           |         |           |           |           |           |   |       |
|          | 2    | 4.8  | DRPPEEEETR                       | ITRAQ4plex@N-term                                                                                                          |                                                           | -0.0089 | 1400.6565 | 467.8928  | 1400.6654 | 467.8957  | 3 | 24.02 |
|          | 2    | 4.8  | NGGENSPDKR                       | ITRAQ4plex@N-term; Oxidation(P)@7; ITRAQ4plex(K)@9                                                                         | missed K-R@9                                              | -0.0257 | 1374.7202 | 688.3674  | 1374.7459 | 688.3802  | 2 | 25.41 |
| LIC10551 |      |      |                                  |                                                                                                                            |                                                           |         |           |           |           |           |   |       |
|          | 5.93 | 11.9 | DIKPGAEFVFPGEK                   | ITRAQ4plex@N-term; ITRAQ4plex(K)@3; ITRAQ4plex(K)@15                                                                       |                                                           | -0.0024 | 2094.1340 | 699.0519  | 2094.1363 | 699.0527  | 3 | 32.72 |
|          | 5.93 | 11.9 | FGIFK                            | ITRAQ4plex@N-term; ITRAQ4plex(K)@5                                                                                         |                                                           | 0.0157  | 898.5677  | 450.2911  | 898.5520  | 450.2833  | 2 | 42.38 |
|          | 5.93 | 11.9 | IEIPK                            | ITRAQ4plex@N-term; ITRAQ4plex(K)@5                                                                                         |                                                           | -0.0018 | 886.5713  | 444.2929  | 886.5731  | 444.2938  | 2 | 29.66 |
|          | 5.93 | 11.9 | IPDVLEIR                         | ITRAQ4plex@N-term                                                                                                          |                                                           | 0.0042  | 1097.6608 | 549.8376  | 1097.6566 | 549.8356  | 2 | 33.30 |
|          | 5.93 | 11.9 | KIPDVLEIR                        | ITRAQ4plex@N-term; ITRAQ4plex(K)@1                                                                                         | missed K-I@1                                              | 0.0041  | 1369.8578 | 457.6266  | 1369.8537 | 457.6252  | 3 | 33.71 |
|          | 5.93 | 11.9 | KPMSYFLGGMPWNWK                  | ITRAQ4plex@N-term; ITRAQ4plex(K)@1; ITRAQ4plex(K)@15                                                                       |                                                           | -0.0050 | 2273.1807 | 758.7341  | 2273.1855 | 758.7358  | 3 | 46.34 |
|          | 5.93 | 11.9 | LGNETSAVKYSAIPCEIKKLEVPKNPADDYLR | ITRAQ4plex@N-term; Oxidation(N)@3; ITRAQ4plex(K)@9; Methylthio(C)@15; ITRAQ4plex(K)@18; ITRAQ4plex(K)@19; ITRAQ4plex(K)@24 | missed K-Y@9; missed K-K@18; missed K-L@19; missed K-N@24 | 0.3328  | 4343.6807 | 869.7434  | 4343.3478 | 869.6768  | 5 | 11.10 |
|          | 5.93 | 11.9 | TTEETLSLILSLK                    | ITRAQ4plex@N-term; ITRAQ4plex(K)@14                                                                                        |                                                           | 0.0050  | 1822.0592 | 608.3604  | 1822.0543 | 608.3587  | 3 | 38.58 |
|          | 4.8  | 6.5  | ESISIR                           | Glu->pyro-Glu@N-term                                                                                                       | cleaved Q-E@N-term                                        | 0.0189  | 685.3948  | 686.4020  | 685.3759  | 686.3832  | 1 | 59.06 |
|          | 4.8  | 6.5  | LGNETSAVK                        | ITRAQ4plex@N-term; ITRAQ4plex(K)@9                                                                                         |                                                           | 0.0083  | 1205.6943 | 603.8544  | 1205.6859 | 603.8502  | 2 | 35.03 |
|          | 4.8  | 6.5  | LLGVDGPK                         | ITRAQ4plex@N-term; ITRAQ4plex(K)@8                                                                                         |                                                           | 0.0093  | 1085.6781 | 543.8463  | 1085.6688 | 543.8417  | 2 | 40.26 |
|          | 4.8  | 6.5  | YWSTTPYR                         | ITRAQ4plex@N-term                                                                                                          |                                                           | 0.0050  | 1216.6049 | 609.3097  | 1216.5999 | 609.3072  | 2 | 40.85 |
| LIC10557 |      |      |                                  |                                                                                                                            |                                                           |         |           |           |           |           |   |       |
|          | 2    | 4.4  | LVQEIAFFLK                       | ITRAQ4plex@N-term; ITRAQ4plex(K)@10                                                                                        |                                                           | -0.0391 | 1494.8663 | 748.4404  | 1494.9054 | 748.4600  | 2 | 39.04 |
|          | 2    | 4.4  | MPKLSGLDLLERIPDMNR               | No ITRAQ4plex@N-term; ITRAQ4plex(K)@3; Oxidation(P)@14                                                                     | missed K-L@3; missed R-I@12                               | -0.0138 | 2257.1907 | 753.4042  | 2257.2044 | 753.4088  | 3 | 51.09 |
|          | 1.7  | 4.0  | AFFL                             | ITRAQ4plex@N-term                                                                                                          | cleaved I-A@N-term; cleaved L-K@C-term                    | 0.0104  | 640.3810  | 641.3883  | 640.3706  | 641.3779  | 1 | 58.72 |





|          |      |      |                                           |                                                                                                                         |                                                                                 |         |           |          |           |          |   |       |
|----------|------|------|-------------------------------------------|-------------------------------------------------------------------------------------------------------------------------|---------------------------------------------------------------------------------|---------|-----------|----------|-----------|----------|---|-------|
|          | 2    | 1.4  | DSILPPELFLIP                              | ITRAQ4plex@N-term                                                                                                       | cleaved L-D@N-term; cleaved P-I@C-term                                          | 0.1194  | 1496.9806 | 749.4976 | 1496.8612 | 749.4379 | 2 | 37.43 |
|          | 2    | 1.4  | SGIE                                      | No ITRAQ4plex@N-term                                                                                                    | cleaved L-S@N-term; cleaved E-E@C-term                                          | -0.0004 | 404.1903  | 405.1976 | 404.1907  | 405.1980 | 1 | 28.83 |
|          | 2    | 1.4  | SIAEAMGRKFF                               | No ITRAQ4plex@N-term;<br>ITRAQ4plex(K)@9                                                                                | cleaved F-R@C-term; missed R-K@8;<br>missed K-F@9                               | 0.0213  | 1399.7617 | 700.8881 | 1399.7404 | 700.8775 | 2 | 30.09 |
|          | 2    | 1.4  | VKSGFGMTGELTLTG<br>EVLAIIGGLR             | No ITRAQ4plex@N-term;<br>ITRAQ4plex(K)@2                                                                                | missed K-S@2                                                                    | -0.0748 | 2549.3262 | 638.3388 | 2549.4009 | 638.3575 | 4 | 44.61 |
|          | 2    | 1.4  | VNLPDNAVNLVNTIR                           | ITRAQ4plex@N-term;<br>Deamidated(N)@2;<br>Oxidation(P)@4;<br>Deamidated(N)@13                                           |                                                                                 | 0.0227  | 1926.0770 | 643.0330 | 1926.0544 | 643.0254 | 3 | 45.87 |
|          | 2    | 1.4  | VSYPEEPEGAPK                              | ITRAQ4plex@N-term;<br>ITRAQ4plex(K)@12                                                                                  |                                                                                 | 0.0051  | 1589.8231 | 795.9188 | 1589.8181 | 795.9163 | 2 | 27.87 |
| LIC10620 |      |      |                                           |                                                                                                                         |                                                                                 |         |           |          |           |          |   |       |
|          | 2.03 | 4.8  | GGELVLDLLK                                | ITRAQ4plex@N-term;<br>ITRAQ4plex(K)@11                                                                                  |                                                                                 | 0.0308  | 1430.8896 | 716.4521 | 1430.8588 | 716.4367 | 2 | 38.62 |
|          | 2.03 | 4.8  | LVLIGGGQEFK                               | No ITRAQ4plex@N-term;<br>Deamidated(O)@8;<br>Oxidation(F)@10;<br>ITRAQ4plex(K)@11                                       |                                                                                 | 0.0596  | 1320.8007 | 441.2742 | 1320.7411 | 441.2543 | 3 | 31.53 |
|          | 2.03 | 4.8  | NVNRFTTEK                                 | ITRAQ4plex@N-term;<br>Oxidation(R)@4; Oxidation(F)@5;<br>ITRAQ4plex(K)@9                                                | missed R-F@4                                                                    | 0.0612  | 1455.8174 | 486.2797 | 1455.7561 | 486.2593 | 3 | 30.15 |
|          | 2.03 | 4.8  | TGVFFPEQTVESLQA<br>AIDR                   | ITRAQ4plex@N-term                                                                                                       |                                                                                 | -0.0099 | 2251.1509 | 751.3909 | 2251.1606 | 751.3942 | 3 | 39.40 |
|          | 2.03 | 4.8  | VFFP                                      | ITRAQ4plex@N-term                                                                                                       | cleaved G-V@N-term; cleaved P-E@C-term                                          | -0.0181 | 652.3525  | 653.3598 | 652.3706  | 653.3779 | 1 | 58.47 |
| LIC10624 |      |      |                                           |                                                                                                                         |                                                                                 |         |           |          |           |          |   |       |
|          | 5.4  | 18.4 | AERNAQMRDLINLIVG<br>RKSKDELINIEDQLDL<br>R | ITRAQ4plex@N-term;<br>Deamidated(R)@3;<br>ITRAQ4plex(K)@18;<br>ITRAQ4plex(K)@20;<br>Oxidation(D)@28;<br>Oxidation(R)@33 | cleaved L-A@N-term; missed R-N@3;<br>missed R-D@8; missed R-K@17; missed K-S@18 | 0.3065  | 4343.6660 | 869.7405 | 4343.3597 | 869.6792 | 5 | 55.68 |
|          | 1.96 | 5.2  | AFGIK                                     | ITRAQ4plex@N-term;<br>ITRAQ4plex(K)@6                                                                                   | cleaved L-A@N-term                                                              | -0.0078 | 893.5500  | 447.7823 | 893.5578  | 447.7862 | 2 | 39.52 |
|          | 5.4  | 18.4 | AQVNHILTEGK                               | ITRAQ4plex@N-term;<br>ITRAQ4plex(K)@11                                                                                  |                                                                                 | -0.0006 | 1496.8549 | 499.9589 | 1496.8555 | 499.9591 | 3 | 29.52 |
|          | 5.4  | 18.4 | DLINLIVGR                                 | ITRAQ4plex@N-term                                                                                                       |                                                                                 | 0.0008  | 1155.7106 | 578.8625 | 1155.7097 | 578.8621 | 2 | 35.83 |
|          | 1.96 | 5.2  | DLINLIVGRK                                | ITRAQ4plex@N-term;<br>ITRAQ4plex(K)@10                                                                                  | missed R-K@9                                                                    | -0.0613 | 1427.8455 | 714.9300 | 1427.9068 | 714.9607 | 2 | 54.41 |
|          | 5.4  | 18.4 | EDQTLSAELAER                              | ITRAQ4plex@N-term                                                                                                       |                                                                                 | -0.0016 | 1504.7476 | 753.3810 | 1504.7491 | 753.3818 | 2 | 29.24 |
|          | 1.96 | 5.2  | LAFGIK                                    | ITRAQ4plex@N-term;<br>ITRAQ4plex(K)@7                                                                                   |                                                                                 | 0.0059  | 1006.6478 | 504.3311 | 1006.6419 | 504.3282 | 2 | 43.24 |
| LIC10628 |      |      |                                           |                                                                                                                         |                                                                                 |         |           |          |           |          |   |       |
|          | 7.28 | 17.3 | AASLNPKPR                                 | No ITRAQ4plex@N-term;<br>ITRAQ4plex(K)@7                                                                                | cleaved A-A@N-term                                                              | 0.0042  | 1096.6517 | 549.3331 | 1096.6475 | 549.3310 | 2 | 27.10 |
|          | 7.28 | 17.3 | APASQWK                                   | ITRAQ4plex@N-term;<br>ITRAQ4plex(K)@7                                                                                   |                                                                                 | 0.0008  | 1074.6074 | 538.3110 | 1074.6066 | 538.3106 | 2 | 27.87 |
|          | 7.28 | 17.3 | ASLNPKPR                                  | No ITRAQ4plex@N-term;<br>ITRAQ4plex(K)@6                                                                                | cleaved A-A@N-term                                                              | 0.0058  | 1025.6162 | 513.8154 | 1025.6104 | 513.8125 | 2 | 26.89 |
|          | 7.28 | 17.3 | DGAAA                                     | ITRAQ4plex@N-term                                                                                                       | cleaved G-D@N-term; cleaved A-A@C-term                                          | 0.0315  | 547.3039  | 548.3112 | 547.2724  | 548.2797 | 1 | 41.87 |
|          | 7.28 | 17.3 | FLGDENLK                                  | ITRAQ4plex@N-term;<br>ITRAQ4plex(K)@8                                                                                   |                                                                                 | -0.0018 | 1222.6783 | 612.3464 | 1222.6801 | 612.3473 | 2 | 29.93 |
|          | 7.28 | 17.3 | GAGDGAAAASLNPK                            | ITRAQ4plex@N-term;<br>ITRAQ4plex(K)@14                                                                                  | cleaved K-P@C-term                                                              | -0.0010 | 1486.7974 | 744.4059 | 1486.7983 | 744.4064 | 2 | 26.79 |
|          | 7.28 | 17.3 | GAGDGAAAASLNPKP<br>R                      | Carbamyl@N-term;<br>ITRAQ4plex(K)@14                                                                                    |                                                                                 | -0.0015 | 1638.8545 | 820.4345 | 1638.8560 | 820.4353 | 2 | 27.24 |
|          | 7.28 | 17.3 | LGDENLK                                   | ITRAQ4plex@N-term;<br>ITRAQ4plex(K)@7                                                                                   | cleaved F-L@N-term                                                              | 0.0035  | 1075.6152 | 538.8149 | 1075.6117 | 538.8131 | 2 | 27.73 |
|          | 7.28 | 17.3 | SLNPKPR                                   | No ITRAQ4plex@N-term;<br>ITRAQ4plex(K)@5                                                                                | cleaved A-S@N-term                                                              | 0.0047  | 954.5780  | 478.2963 | 954.5732  | 478.2939 | 2 | 27.30 |
|          | 7.28 | 17.3 | YVHLSQN                                   | ITRAQ4plex@N-term                                                                                                       |                                                                                 | 0.0007  | 1102.5901 | 552.3023 | 1102.5893 | 552.3019 | 2 | 29.55 |
| LIC10662 |      |      |                                           |                                                                                                                         |                                                                                 |         |           |          |           |          |   |       |
|          | 3.4  | 17.6 | IFTFVNDYHNWPSWS<br>PWEEK                  | ITRAQ4plex@N-term;<br>ITRAQ4plex(K)@19                                                                                  |                                                                                 | 0.0213  | 2740.3530 | 914.4583 | 2740.3318 | 914.4512 | 3 | 41.39 |
|          | 3.4  | 17.6 | MEIIESNPSNIK                              | ITRAQ4plex@N-term;<br>ITRAQ4plex(K)@13                                                                                  |                                                                                 | 0.0087  | 1748.9309 | 583.9843 | 1748.9222 | 583.9813 | 3 | 29.63 |
| LIC10672 |      |      |                                           |                                                                                                                         |                                                                                 |         |           |          |           |          |   |       |
|          | 8.34 | 20.1 | DLEATINER                                 | ITRAQ4plex@N-term                                                                                                       |                                                                                 | 0.0062  | 1203.6279 | 602.8212 | 1203.6217 | 602.8181 | 2 | 28.41 |
|          | 8.34 | 20.1 | EKGQADLSR                                 | ITRAQ4plex@N-term;<br>ITRAQ4plex(K)@2                                                                                   | missed K-G@2                                                                    | -0.0497 | 1290.6639 | 431.2286 | 1290.7135 | 431.2451 | 3 | 26.50 |

|          |       |      |                                  |                                                                                                                                              |                                                          |         |           |          |           |          |   |       |
|----------|-------|------|----------------------------------|----------------------------------------------------------------------------------------------------------------------------------------------|----------------------------------------------------------|---------|-----------|----------|-----------|----------|---|-------|
|          | 8.34  | 20.1 | IKEVELASEK                       | ITRAQ4plex@N-term;<br>ITRAQ4plex(K)@2;<br>ITRAQ4plex(K)@10                                                                                   |                                                          | -0.0227 | 1576.9175 | 526.6464 | 1576.9401 | 526.6540 | 3 | 31.61 |
|          | 8.34  | 20.1 | IKEVELASEKKR                     | ITRAQ4plex@N-term;<br>ITRAQ4plex(K)@2;<br>ITRAQ4plex(K)@10; No<br>ITRAQ4plex(K)@11                                                           | missed K-K@10; missed K-R@11                             | -0.0402 | 1861.0961 | 621.3726 | 1861.1362 | 621.3860 | 3 | 34.59 |
|          | 2     | 6.1  | LERFDKIENTKVADISL<br>ENQIKALR    | ITRAQ4plex@N-term;<br>Deamidated(R)@3;<br>ITRAQ4plex(K)@6;<br>Deamidated(N)@9;<br>ITRAQ4plex(K)@11;<br>Deamidated(N)@19;<br>ITRAQ4plex(K)@22 | missed R-F@3; missed K-I@6; missed K-V@11; missed K-A@22 | -0.0164 | 3521.9629 | 881.4980 | 3521.9792 | 881.5021 | 4 | 57.19 |
|          | 8.34  | 20.1 | LIFTPPDVLASQVK                   | ITRAQ4plex@N-term;<br>ITRAQ4plex(K)@14                                                                                                       |                                                          | -0.0091 | 1815.0658 | 908.5402 | 1815.0750 | 908.5448 | 2 | 35.13 |
|          | 8.34  | 20.1 | LNVEEFMK                         | ITRAQ4plex@N-term;<br>ITRAQ4plex(K)@8                                                                                                        | cleaved I-L@N-term                                       | 0.0887  | 1296.7878 | 433.2699 | 1296.6991 | 433.2403 | 3 | 29.54 |
|          | 2     | 6.1  | LVILR                            | No ITRAQ4plex@N-term                                                                                                                         | cleaved L-L@N-term; cleaved R-P@C-term                   | 0.0122  | 612.4445  | 613.4517 | 612.4323  | 613.4396 | 1 | 54.24 |
|          | 8.34  | 20.1 | SDVFSEQSSSYTK                    | ITRAQ4plex@N-term;<br>ITRAQ4plex(K)@13                                                                                                       |                                                          | -0.0092 | 1721.8259 | 861.9202 | 1721.8352 | 861.9249 | 2 | 28.27 |
| LIC10680 |       |      |                                  |                                                                                                                                              |                                                          |         |           |          |           |          |   |       |
|          | 2     | 12.2 | IDAPSEEVAR                       | ITRAQ4plex@N-term                                                                                                                            |                                                          | -0.0020 | 1229.6354 | 615.8250 | 1229.6374 | 615.8260 | 2 | 27.30 |
| LIC10700 |       |      |                                  |                                                                                                                                              |                                                          |         |           |          |           |          |   |       |
|          | 10.09 | 16.6 | AGVIALTK                         | ITRAQ4plex@N-term;<br>ITRAQ4plex(K)@8                                                                                                        |                                                          | 0.0010  | 1059.6907 | 530.8526 | 1059.6896 | 530.8521 | 2 | 40.29 |
|          | 10.09 | 16.6 | AIAINTIAK                        | ITRAQ4plex@N-term;<br>ITRAQ4plex(K)@8                                                                                                        |                                                          | 0.0026  | 1088.6824 | 545.3484 | 1088.6797 | 545.3471 | 2 | 36.41 |
|          | 10.09 | 16.6 | EQIEQAAADVAK                     | Glu->pyro-Glu@N-term;<br>Deamidated(Q)@2;<br>Deamidated(Q)@5;<br>Oxidation(D)@9;<br>ITRAQ4plex(K)@12                                         |                                                          | -0.0160 | 1415.6742 | 708.8444 | 1415.6902 | 708.8524 | 2 | 36.58 |
|          | 8     | 13.5 | KLTDPAFIPLR                      | ITRAQ4plex@N-term;<br>ITRAQ4plex(K)@1                                                                                                        | missed K-L@1                                             | -0.0045 | 1557.9441 | 520.3220 | 1557.9486 | 520.3235 | 3 | 32.97 |
|          | 8     | 13.5 | LDLFLVNNAGVLK                    | ITRAQ4plex@N-term;<br>ITRAQ4plex(K)@12                                                                                                       |                                                          | -0.0823 | 1589.8562 | 795.9354 | 1589.9385 | 795.9765 | 2 | 37.94 |
|          | 8     | 13.5 | LTDPAFIPLR                       | ITRAQ4plex@N-term                                                                                                                            |                                                          | 0.0072  | 1285.7589 | 643.8867 | 1285.7516 | 643.8831 | 2 | 33.16 |
|          | 8     | 13.5 | LVNNAGVLKDNLFIR                  | ITRAQ4plex@N-term;<br>ITRAQ4plex(K)@9                                                                                                        | cleaved F-L@N-term                                       | -0.0152 | 1973.1515 | 658.7244 | 1973.1666 | 658.7295 | 3 | 35.75 |
|          | 8     | 13.5 | PAFIPLRRPQTQEQEIA<br>NAVK        | ITRAQ4plex@N-term;<br>Deamidated(R)@7;<br>Deamidated(R)@8;<br>Oxidation(N)@17;<br>ITRAQ4plex(K)@20                                           | cleaved D-P@N-term; missed R-R@7                         | -0.0108 | 2511.3945 | 838.1388 | 2511.4053 | 838.1424 | 3 | 54.13 |
|          | 8     | 13.5 | QFEGKVALVTGAASP<br>RGLGRAIANTIAK | No ITRAQ4plex@N-term;<br>Oxidation(F)@2;<br>ITRAQ4plex(K)@5;<br>Deamidated(R)@16;<br>Deamidated(N)@24;<br>ITRAQ4plex(K)@28                   | missed K-V@5; missed R-G@16; missed R-A@20               | -0.0852 | 3101.6589 | 776.4220 | 3101.7441 | 776.4433 | 4 | 42.47 |
|          | 8     | 13.5 | RPGTQEQEIANAVK                   | ITRAQ4plex@N-term;<br>ITRAQ4plex(K)@13                                                                                                       |                                                          | 0.0114  | 1698.9734 | 567.3317 | 1698.9621 | 567.3280 | 3 | 29.33 |
|          | 8     | 13.5 | VALVTGAASPR                      | ITRAQ4plex@N-term                                                                                                                            |                                                          | -0.0041 | 1184.6958 | 593.3552 | 1184.6999 | 593.3572 | 2 | 28.27 |
|          | 10.09 | 16.6 | VIAGVK                           | ITRAQ4plex@N-term;<br>ITRAQ4plex(K)@6                                                                                                        | cleaved S-V@N-term                                       | -0.0011 | 873.5881  | 437.8013 | 873.5891  | 437.8018 | 2 | 39.56 |
| LIC10748 |       |      |                                  |                                                                                                                                              |                                                          |         |           |          |           |          |   |       |
|          | 4     | 19.9 | FLIQSLPSVSTFVGSK                 | ITRAQ4plex@N-term;<br>ITRAQ4plex(K)@16                                                                                                       |                                                          | -1.0305 | 1996.1136 | 666.3785 | 1997.1441 | 666.7220 | 3 | 36.33 |
|          | 4     | 19.9 | IDGPFANFTGLVDEIF<br>PDK          | ITRAQ4plex@N-term;<br>ITRAQ4plex(K)@20                                                                                                       |                                                          | -0.0095 | 2495.3096 | 832.7772 | 2495.3192 | 832.7803 | 3 | 41.58 |
| LIC10760 |       |      |                                  |                                                                                                                                              |                                                          |         |           |          |           |          |   |       |
|          | 7.05  | 14.4 | ALSALDSLK                        | ITRAQ4plex@N-term;<br>ITRAQ4plex(K)@10                                                                                                       |                                                          | 0.0003  | 1318.7704 | 660.3925 | 1318.7700 | 660.3923 | 2 | 31.13 |
|          | 7.05  | 14.4 | ALSALDSLKVCMDL<br>HK             | No ITRAQ4plex@N-term;<br>Deamidated(N)@9;<br>ITRAQ4plex(K)@10;<br>Methylthio(C)@12;<br>ITRAQ4plex(K)@17                                      | missed K-V@10                                            | -0.0541 | 2192.0706 | 731.6974 | 2192.1247 | 731.7155 | 3 | 27.03 |
|          | 7.05  | 14.4 | FTIDPNTVNSGNDR<br>DAK            | ITRAQ4plex@N-term;<br>Oxidation(N)@12;<br>Oxidation(D)@14;<br>ITRAQ4plex(K)@18                                                               | missed R-D@15                                            | -0.0081 | 2297.1047 | 766.7089 | 2297.1128 | 766.7115 | 3 | 35.36 |
|          | 2.01  | 3.8  | KFTID                            | ITRAQ4plex@N-term;<br>ITRAQ4plex(K)@1                                                                                                        | cleaved M-K@N-term; cleaved D-P@C-term; missed K-F@1     | -0.0122 | 910.5245  | 456.2695 | 910.5368  | 456.2757 | 2 | 41.06 |

|          |      |      |                              |                                                                                 |                                                                 |         |           |           |           |           |   |       |
|----------|------|------|------------------------------|---------------------------------------------------------------------------------|-----------------------------------------------------------------|---------|-----------|-----------|-----------|-----------|---|-------|
|          | 2.01 | 3.8  | LGDFK                        | ITRAQ4plex@N-term;<br>ITRAQ4plex(K)@5                                           | cleaved N-L@N-term                                              | 0.0079  | 866.5185  | 434.2665  | 866.5105  | 434.2625  | 2 | 40.44 |
|          | 7.05 | 14.4 | LWPEVELTISTK                 | ITRAQ4plex@N-term;<br>ITRAQ4plex(K)@12                                          |                                                                 | -0.0181 | 1702.9568 | 852.4857  | 1702.9749 | 852.4947  | 2 | 53.74 |
|          | 2.01 | 3.8  | SAFFYPMK                     | ITRAQ4plex@N-term;<br>ITRAQ4plex(K)@8                                           |                                                                 | 0.0031  | 1277.6753 | 639.8449  | 1277.6722 | 639.8434  | 2 | 45.15 |
|          | 7.05 | 14.4 | TGVGGGSDK                    | ITRAQ4plex@N-term;<br>ITRAQ4plex(K)@9                                           |                                                                 | -0.0073 | 1154.6102 | 578.3124  | 1154.6175 | 578.3160  | 2 | 27.10 |
|          | 7.05 | 14.4 | TNLSLGDGFK                   | ITRAQ4plex@N-term;<br>ITRAQ4plex(K)@9                                           |                                                                 | -0.0036 | 1308.7246 | 655.3696  | 1308.7281 | 655.3713  | 2 | 31.34 |
|          | 7.05 | 14.4 | VGTT                         | ITRAQ4plex@N-term                                                               | cleaved V-V@N-term; cleaved T-T@C-term                          | 0.0149  | 520.3127  | 521.3200  | 520.2979  | 521.3051  | 1 | 50.50 |
| LIC10761 |      |      |                              |                                                                                 |                                                                 |         |           |           |           |           |   |       |
|          | 2    | 6.7  | AKQP                         | No ITRAQ4plex@N-term;<br>ITRAQ4plex(K)@2                                        | cleaved I-A@N-term; cleaved P-E@C-term;<br>missed K-Q@2         | -0.0008 | 586.3553  | 587.3625  | 586.3560  | 587.3633  | 1 | 53.86 |
|          | 2    | 6.7  | GWVVDAEGK                    | ITRAQ4plex@N-term;<br>ITRAQ4plex(K)@10                                          |                                                                 | 0.0417  | 1394.7855 | 698.4000  | 1394.7438 | 698.3792  | 2 | 47.10 |
|          | 2    | 6.7  | LASGIAARLR                   | ITRAQ4plex@N-term;<br>Oxidation(R)@8                                            | missed R-L@8                                                    | -0.0418 | 1186.6851 | 594.3498  | 1186.7268 | 594.3707  | 2 | 33.59 |
| LIC10765 |      |      |                              |                                                                                 |                                                                 |         |           |           |           |           |   |       |
|          | 2    | 7.5  | IIHPANFGVQK                  | ITRAQ4plex@N-term;<br>ITRAQ4plex(K)@11                                          |                                                                 | -0.0058 | 1510.8805 | 504.6341  | 1510.8864 | 504.6361  | 3 | 44.16 |
|          | 2    | 7.5  | SFGNAYILK                    | No ITRAQ4plex@N-term;<br>Deamidated(N)@4;<br>Oxidation(Y)@6;<br>ITRAQ4plex(K)@9 |                                                                 | 0.0232  | 1172.6432 | 587.3289  | 1172.6199 | 587.3172  | 2 | 48.18 |
| LIC10768 |      |      |                              |                                                                                 |                                                                 |         |           |           |           |           |   |       |
|          | 6.03 | 9.4  | EERRMRVENR                   | ITRAQ4plex@N-term                                                               | cleaved L-E@N-term; missed R-R@3;<br>missed R-M@4; missed R-V@6 | 0.0792  | 1517.8759 | 506.9659  | 1517.7967 | 506.9395  | 3 | 32.61 |
|          | 6.03 | 9.4  | FLVGSADETPEIAGTA<br>HLLHMLFK | ITRAQ4plex@N-term;<br>ITRAQ4plex(K)@25                                          |                                                                 | 0.0345  | 3013.6172 | 754.4116  | 3013.5827 | 754.4029  | 4 | 53.56 |
|          | 6.03 | 9.4  | FVSVVHPSTPSK                 | ITRAQ4plex@N-term;<br>Oxidation(P)@7;<br>Oxidation(P)@10;<br>ITRAQ4plex(K)@12   |                                                                 | -0.0036 | 1603.8777 | 535.6332  | 1603.8813 | 535.6344  | 3 | 29.97 |
|          | 6.03 | 9.4  | GSLQPLK                      | No ITRAQ4plex@N-term;<br>Deamidated(Q)@4;<br>ITRAQ4plex(K)@7                    |                                                                 | 0.0467  | 886.5713  | 444.2929  | 886.5246  | 444.2696  | 2 | 29.66 |
|          | 6.03 | 9.4  | GYEELDTVTPEDVQR              | ITRAQ4plex@N-term                                                               |                                                                 | -0.0014 | 1893.9065 | 947.9605  | 1893.9078 | 947.9612  | 2 | 30.71 |
|          | 6.03 | 9.4  | LES DR                       | ITRAQ4plex@N-term;<br>Deamidated(R)@5                                           |                                                                 | 0.0223  | 763.4057  | 764.4130  | 763.3834  | 764.3907  | 1 | 50.24 |
|          | 6.03 | 9.4  | TELITSEELFR                  | ITRAQ4plex@N-term                                                               |                                                                 | 0.0279  | 1480.8174 | 741.4160  | 1480.7895 | 741.4020  | 2 | 33.05 |
|          | 6.03 | 9.4  | VLIILGIYLCISNVSVY            | ITRAQ4plex@N-term;<br>Methylthio(C)@10                                          | cleaved Y-A@C-term                                              | 0.0052  | 2071.1636 | 691.3951  | 2071.1583 | 691.3934  | 3 | 33.20 |
| LIC10769 |      |      |                              |                                                                                 |                                                                 |         |           |           |           |           |   |       |
|          | 4    | 4.3  | EFPEVK                       | ITRAQ4plex@N-term;<br>Oxidation(F)@2;<br>ITRAQ4plex(K)@6                        | cleaved F-E@N-term                                              | 0.0070  | 1051.5864 | 526.8005  | 1051.5793 | 526.7969  | 2 | 26.61 |
|          | 4    | 4.3  | EGYGAK                       | ITRAQ4plex@N-term;<br>ITRAQ4plex(K)@6                                           | cleaved L-E@N-term                                              | 0.0158  | 911.5115  | 456.7630  | 911.4956  | 456.7551  | 2 | 29.07 |
|          | 4    | 4.3  | FIETLEGYAK                   | ITRAQ4plex@N-term;<br>Oxidation(Y)@8;<br>ITRAQ4plex(K)@11                       |                                                                 | 0.0272  | 1530.8445 | 511.2888  | 1530.8173 | 511.2797  | 3 | 33.18 |
|          | 4    | 4.3  | GTEVYFLPGEEFPLR              | ITRAQ4plex@N-term                                                               |                                                                 | 0.0032  | 1896.9775 | 949.4960  | 1896.9743 | 949.4945  | 2 | 35.52 |
|          | 4    | 4.3  | IDTDVNSEK                    | ITRAQ4plex@N-term;<br>ITRAQ4plex(K)@9                                           |                                                                 | -0.0049 | 1307.6764 | 654.8455  | 1307.6812 | 654.8479  | 2 | 26.48 |
|          | 4    | 4.3  | IGGGGFSSYLMQKIRS<br>DR       | ITRAQ4plex@N-term;<br>ITRAQ4plex(K)@13                                          | cleaved I-I@N-term; missed K-I@13; missed<br>R-S@15             | 0.0354  | 2259.2390 | 1130.6270 | 2259.2038 | 1130.6092 | 2 | 40.98 |
|          | 4    | 4.3  | QEHGMPNDYLK                  | ITRAQ4plex@N-term;<br>ITRAQ4plex(K)@11                                          | cleaved F-Q@N-term                                              | -0.0010 | 1618.8007 | 540.6075  | 1618.8017 | 540.6078  | 3 | 49.29 |
|          | 4    | 4.3  | SGFLSYKDR                    | No ITRAQ4plex@N-term;<br>ITRAQ4plex(K)@7                                        | cleaved F-S@N-term                                              | 0.0599  | 1215.6969 | 608.8557  | 1215.6370 | 608.8258  | 2 | 40.91 |
| LIC10772 |      |      |                              |                                                                                 |                                                                 |         |           |           |           |           |   |       |
|          | 7.1  | 15.0 | EEAKGNELASAINDPK             | ITRAQ4plex@N-term;<br>ITRAQ4plex(K)@4;<br>ITRAQ4plex(K)@16                      | missed K-G@4                                                    | -0.0544 | 2117.0786 | 706.7001  | 2117.1330 | 706.7183  | 3 | 44.27 |
|          | 7.1  | 15.0 | EYGISILSNLKPEEESK            | ITRAQ4plex@N-term;<br>ITRAQ4plex(K)@11;<br>ITRAQ4plex(K)@17                     |                                                                 | -0.0009 | 2367.2891 | 790.1036  | 2367.2899 | 790.1039  | 3 | 34.08 |
|          | 7.1  | 15.0 | LQIAYYQMIQADR                | ITRAQ4plex@N-term;<br>Deamidated(Q)@2                                           |                                                                 | 0.0142  | 1756.9082 | 879.4614  | 1756.8940 | 879.4543  | 2 | 58.11 |
|          | 7.1  | 15.0 | NDIHALATVTK                  | ITRAQ4plex@N-term;<br>ITRAQ4plex(K)@11                                          |                                                                 | -0.0041 | 1469.8403 | 490.9541  | 1469.8446 | 490.9555  | 3 | 29.66 |
|          | 7.1  | 15.0 | SILSNLK                      | ITRAQ4plex@N-term;<br>ITRAQ4plex(K)@7                                           | cleaved I-S@N-term; cleaved K-P@C-term                          | 0.0108  | 1061.6797 | 531.8471  | 1061.6688 | 531.8417  | 2 | 36.61 |
|          | 7.1  | 15.0 | YQGDYLEEFHYAR                | ITRAQ4plex@N-term                                                               |                                                                 | 0.0131  | 1833.8574 | 612.2931  | 1833.8444 | 612.2887  | 3 | 32.87 |

|          |       |      |                                    |                                                                            |                                                      |         |           |           |           |           |   |       |
|----------|-------|------|------------------------------------|----------------------------------------------------------------------------|------------------------------------------------------|---------|-----------|-----------|-----------|-----------|---|-------|
| LIC10787 |       |      |                                    |                                                                            |                                                      |         |           |           |           |           |   |       |
|          | 12.48 | 28.5 | DVFDENTVPDNGGDIK                   | ITRAQ4plex@N-term; Deamidated(N)@11; ITRAQ4plex(K)@18                      |                                                      | -0.0063 | 2280.0574 | 761.0264  | 2280.0637 | 761.0285  | 3 | 30.47 |
|          | 12.48 | 28.5 | EVFPPHEVYVK                        | ITRAQ4plex@N-term; ITRAQ4plex(K)@11                                        | cleaved V-E@N-term                                   | -0.0083 | 1630.8879 | 544.6366  | 1630.8963 | 544.6394  | 3 | 30.94 |
|          | 8.54  | 20.5 | GFDRVEVFPHEVYVK                    | CarbamyI@N-term; ITRAQ4plex(K)@16                                          | missed R-V@4                                         | 0.0196  | 2104.1060 | 702.3759  | 2104.0864 | 702.3694  | 3 | 48.85 |
|          | 12.48 | 28.5 | KLATIPGFVPQSTR                     | ITRAQ4plex@N-term; ITRAQ4plex(K)@1                                         | missed K-L@1                                         | -0.0240 | 1903.0895 | 635.3704  | 1903.1135 | 635.3784  | 3 | 39.20 |
|          | 8.54  | 20.5 | LDYFGWR                            | ITRAQ4plex@N-term                                                          |                                                      | 0.0065  | 1099.5638 | 550.7892  | 1099.5573 | 550.7859  | 2 | 47.02 |
|          | 12.48 | 28.5 | LILENFEEAEDWR                      | ITRAQ4plex@N-term                                                          |                                                      | -0.0141 | 1806.8770 | 904.4457  | 1806.8910 | 904.4528  | 2 | 35.94 |
|          | 8.54  | 20.5 | NHILGVK                            | ITRAQ4plex@N-term; Deamidated(N)@1; ITRAQ4plex(K)@7                        |                                                      | -0.0008 | 1068.6527 | 535.3336  | 1068.6535 | 535.3340  | 2 | 40.20 |
|          | 12.48 | 28.5 | QLSIWALGR                          | ITRAQ4plex@N-term                                                          |                                                      | -0.0095 | 1186.6851 | 594.3498  | 1186.6944 | 594.3545  | 2 | 33.59 |
|          | 12.48 | 28.5 | STTPLGETK                          | ITRAQ4plex@N-term; ITRAQ4plex(K)@9                                         |                                                      | 0.0039  | 1220.6896 | 611.3521  | 1220.6856 | 611.3501  | 2 | 25.22 |
|          | 12.48 | 28.5 | TRFA                               | ITRAQ4plex@N-term                                                          | cleaved S-T@N-term; cleaved A-L@C-term; missed R-F@2 | 0.0277  | 637.3947  | 638.4019  | 637.3669  | 638.3742  | 1 | 56.31 |
|          | 12.48 | 28.5 | VEVFPHEVYVK                        | ITRAQ4plex@N-term; ITRAQ4plex(K)@12                                        |                                                      | -0.0033 | 1729.9614 | 577.6611  | 1729.9647 | 577.6622  | 3 | 31.51 |
|          | 12.48 | 28.5 | YPGSEIKDN                          | ITRAQ4plex@N-term; ITRAQ4plex(K)@7; Deamidated(N)@9                        | cleaved N-W@C-term                                   | 0.0457  | 1310.7056 | 656.3600  | 1310.6598 | 656.3372  | 2 | 33.72 |
|          | 12.48 | 28.5 | YPGSEIKDNW                         | ITRAQ4plex@N-term; ITRAQ4plex(K)@7                                         |                                                      | 0.0208  | 1495.7759 | 748.8952  | 1495.7551 | 748.8848  | 2 | 31.49 |
| LIC10788 |       |      |                                    |                                                                            |                                                      |         |           |           |           |           |   |       |
|          | 8.49  | 16.9 | AMSVWVCGR                          | ITRAQ4plex@N-term; Methylthio(C)@7                                         |                                                      | 0.0056  | 1197.5635 | 599.7890  | 1197.5579 | 599.7862  | 2 | 46.56 |
|          | 12.47 | 26.5 | FOFTYPGENAVTIRPPR                  | ITRAQ4plex@N-term                                                          |                                                      | -0.0161 | 2136.1077 | 713.0432  | 2136.1238 | 713.0485  | 3 | 33.15 |
|          | 12.47 | 26.5 | GIDTATGIDVSGLELR                   | ITRAQ4plex@N-term                                                          |                                                      | 0.0197  | 1759.9635 | 880.9890  | 1759.9438 | 880.9792  | 2 | 49.17 |
|          | 12.47 | 26.5 | GNEYNLEGWIEDVK                     | ITRAQ4plex@N-term; ITRAQ4plex(K)@14                                        |                                                      | 0.0038  | 2039.9871 | 1021.0010 | 2039.9832 | 1020.9989 | 2 | 37.63 |
|          | 8.49  | 16.9 | IFGERK                             | ITRAQ4plex@N-term; ITRAQ4plex(K)@6                                         | cleaved V-I@N-term; missed R-K@5                     | 0.0111  | 1036.6384 | 519.3265  | 1036.6273 | 519.3209  | 2 | 48.73 |
|          | 12.47 | 26.5 | IPEYEILR                           | ITRAQ4plex@N-term                                                          |                                                      | -0.0227 | 1175.6445 | 588.8295  | 1175.6672 | 588.8409  | 2 | 31.59 |
|          | 12.47 | 26.5 | IYGVFPGVSK                         | ITRAQ4plex@N-term; ITRAQ4plex(K)@11                                        |                                                      | 0.0032  | 1482.8358 | 742.4252  | 1482.8326 | 742.4236  | 2 | 32.92 |
|          | 12.47 | 26.5 | LISGKPGDIK                         | ITRAQ4plex@N-term; ITRAQ4plex(K)@5; ITRAQ4plex(K)@10                       |                                                      | -0.0489 | 1458.8646 | 487.2955  | 1458.9135 | 487.3118  | 3 | 30.70 |
|          | 12.47 | 26.5 | QGV PQD VNSYPQVK                   | ITRAQ4plex@N-term; Deamidated(O)@12; ITRAQ4plex(K)@14                      | cleaved P-Q@N-term                                   | 0.0187  | 1846.9856 | 616.6691  | 1846.9669 | 616.6629  | 3 | 27.66 |
|          | 12.47 | 26.5 | SRPDTSGETVYLFDELR                  | ITRAQ4plex@N-term                                                          |                                                      | 0.0249  | 2275.1492 | 759.3903  | 2275.1243 | 759.3820  | 3 | 43.94 |
|          | 8.49  | 16.9 | TIVFK                              | ITRAQ4plex@N-term; ITRAQ4plex(K)@5                                         |                                                      | -0.0025 | 894.5757  | 448.2951  | 894.5782  | 448.2964  | 2 | 39.88 |
|          | 12.47 | 26.5 | VNMRRFMNSF                         | ITRAQ4plex@N-term; Deamidated(N)@2; Deamidated(R)@4                        | cleaved F-K@C-term; missed R-R@4; missed R-F@5       | 0.0514  | 1446.7384 | 724.3765  | 1446.6870 | 724.3508  | 2 | 35.39 |
| LIC10789 |       |      |                                    |                                                                            |                                                      |         |           |           |           |           |   |       |
|          | 17.41 | 9.9  | DILH                               | ITRAQ4plex@N-term                                                          | cleaved H-G@C-term                                   | -0.0038 | 640.3628  | 641.3701  | 640.3666  | 641.3739  | 1 | 56.98 |
|          | 17.41 | 9.9  | DILHGNDDEILR                       | ITRAQ4plex@N-term                                                          |                                                      | 0.0173  | 1552.8140 | 518.6119  | 1552.7967 | 518.6062  | 3 | 31.72 |
|          | 17.41 | 9.9  | DLLNSFIK                           | ITRAQ4plex@N-term; ITRAQ4plex(K)@8                                         | cleaved F-D@N-term                                   | -0.0039 | 1236.7283 | 619.3714  | 1236.7322 | 619.3734  | 2 | 35.74 |
|          | 17.41 | 9.9  | EAIHAGNSEYIR                       | ITRAQ4plex@N-term; Deamidated(N)@7                                         |                                                      | -0.0034 | 1503.7406 | 502.2542  | 1503.7440 | 502.2553  | 3 | 28.57 |
|          | 17.41 | 9.9  | EISATTESRPANDLKL TSLFN E E I Y V R | Glu->pyro-Glu@N-term; ITRAQ4plex(K)@16; Deamidated(N)@22; ITRAQ4plex(Y)@26 | cleaved N-E@N-term; missed K-L@16                    | 0.0192  | 3481.8013 | 871.4576  | 3481.7820 | 871.4528  | 4 | 36.46 |
|          | 17.41 | 9.9  | EKAISLSEELSEK                      | ITRAQ4plex@N-term; No ITRAQ4plex(K)@2; ITRAQ4plex(K)@13                    | missed K-A@2                                         | 0.0512  | 1750.0116 | 584.3445  | 1749.9604 | 584.3274  | 3 | 42.82 |
|          | 17.41 | 9.9  | ETPEVFIWVAK                        | ITRAQ4plex@N-term; ITRAQ4plex(K)@11                                        |                                                      | -0.0004 | 1605.9006 | 803.9576  | 1605.9010 | 803.9578  | 2 | 48.44 |
|          | 17.41 | 9.9  | FLPVAEWSK                          | ITRAQ4plex@N-term; ITRAQ4plex(K)@9                                         |                                                      | 0.0258  | 1363.8002 | 682.9073  | 1363.7744 | 682.8945  | 2 | 34.21 |
|          | 17.41 | 9.9  | IFDDLIEFYK                         | ITRAQ4plex@N-term; ITRAQ4plex(K)@10                                        |                                                      | -0.0023 | 1589.8562 | 795.9354  | 1589.8585 | 795.9365  | 2 | 37.94 |
|          | 17.41 | 9.9  | IPEGAILVTR                         | ITRAQ4plex@N-term                                                          |                                                      | 0.0072  | 1211.7432 | 606.8788  | 1211.7360 | 606.8753  | 2 | 31.07 |
|          | 17.41 | 9.9  | LNSFIK                             | ITRAQ4plex@N-term; Deamidated(N)@2; ITRAQ4plex(K)@6                        | cleaved L-L@N-term                                   | 0.0181  | 1009.6233 | 505.8189  | 1009.6052 | 505.8099  | 2 | 43.12 |

|          |     |                                   |                                                                                                        |                                                    |         |           |           |           |           |   |       |
|----------|-----|-----------------------------------|--------------------------------------------------------------------------------------------------------|----------------------------------------------------|---------|-----------|-----------|-----------|-----------|---|-------|
| 17.41    | 9.9 | LTSFNRMMLTADIKSE<br>VSGK          | No iTRAQ4plex@N-term;<br>iTRAQ4plex(K)@14;<br>iTRAQ4plex(K)@20                                         | cleaved L-L@N-term; missed R-M@7;<br>missed K-S@14 | -0.0444 | 2498.2964 | 833.7727  | 2498.3406 | 833.7875  | 3 | 36.36 |
| 17.41    | 9.9 | PNIGFDPK                          | Formyl@N-term; Methyl(D)@6;<br>iTRAQ4plex(K)@8                                                         | cleaved E-P@N-term                                 | -0.0067 | 1072.5609 | 537.2877  | 1072.5675 | 537.2910  | 2 | 39.48 |
| 17.41    | 9.9 | QAIEFATK                          | iTRAQ4plex@N-term;<br>Deamidated(Q)@1;<br>iTRAQ4plex(K)@8;<br>iTRAQ4plex(K)@10                         | missed K-T@8                                       | -0.0253 | 1568.8887 | 523.9702  | 1568.9139 | 523.9786  | 3 | 34.64 |
| 17.41    | 9.9 | QVQLQAAIK                         | iTRAQ4plex@N-term;<br>Deamidated(Q)@5;<br>iTRAQ4plex(K)@9                                              |                                                    | -0.0104 | 1286.7697 | 429.9305  | 1286.7802 | 429.9340  | 3 | 34.96 |
| 17.41    | 9.9 | SFIK                              | No iTRAQ4plex@N-term;<br>iTRAQ4plex(K)@4                                                               | cleaved N-S@N-term                                 | -0.0048 | 637.3873  | 638.3946  | 637.3921  | 638.3994  | 1 | 56.42 |
| 17.41    | 9.9 | VIYLLK                            | iTRAQ4plex@N-term;<br>iTRAQ4plex(K)@6                                                                  |                                                    | -0.0135 | 1035.6802 | 518.8474  | 1035.6936 | 518.8541  | 2 | 39.35 |
| 17.41    | 9.9 | WAIIEHITDQILK                     | iTRAQ4plex@N-term;<br>iTRAQ4plex(K)@13                                                                 |                                                    | -0.0315 | 1867.0496 | 623.3571  | 1867.0811 | 623.3676  | 3 | 44.29 |
| 17.41    | 9.9 | YLLGILSLER                        | iTRAQ4plex@N-term                                                                                      |                                                    | 0.0072  | 1319.8007 | 660.9076  | 1319.7935 | 660.9040  | 2 | 37.20 |
| 17.41    | 9.9 | YPMSEI                            | iTRAQ4plex@N-term;<br>Oxidation(M)@3                                                                   | cleaved E-Y@N-term; cleaved I-S@C-term             | 0.0463  | 1012.5120 | 507.2633  | 1012.4657 | 507.2401  | 2 | 25.12 |
| 17.41    | 9.9 | YVNHSLLEDFLK                      | iTRAQ4plex@N-term;<br>iTRAQ4plex(K)@12                                                                 |                                                    | -0.0030 | 1764.9624 | 589.3281  | 1764.9654 | 589.3291  | 3 | 36.05 |
| 17.41    | 9.9 | YYENKDEITELFK                     | iTRAQ4plex@N-term;<br>iTRAQ4plex(K)@5;<br>iTRAQ4plex(K)@13                                             |                                                    | -0.0151 | 2123.1001 | 708.7073  | 2123.1152 | 708.7123  | 3 | 34.63 |
| 9.77     | 5.5 | DEITELFKNNIPDFFK                  | No iTRAQ4plex@N-term;<br>iTRAQ4plex(K)@8;<br>Deamidated(N)@9;<br>Deamidated(N)@10;<br>iTRAQ4plex(K)@16 | missed K-N@8                                       | 0.0604  | 2259.2158 | 1130.6150 | 2259.1555 | 1130.5850 | 2 | 56.99 |
| 9.77     | 5.5 | IGFDPK                            | iTRAQ4plex@N-term;<br>iTRAQ4plex(K)@6                                                                  | cleaved N-I@N-term                                 | 0.0248  | 963.5881  | 482.8013  | 963.5633  | 482.7889  | 2 | 37.79 |
| 9.77     | 5.5 | IMLGHR                            | iTRAQ4plex@N-term                                                                                      |                                                    | -0.0003 | 869.5025  | 435.7585  | 869.5027  | 435.7586  | 2 | 38.76 |
| LIC10791 |     |                                   |                                                                                                        |                                                    |         |           |           |           |           |   |       |
| 2.41     | 4.8 | IATLLK                            | iTRAQ4plex@N-term;<br>iTRAQ4plex(K)@6                                                                  | cleaved T-I@N-term                                 | 0.0005  | 945.6471  | 473.8308  | 945.6466  | 473.8306  | 2 | 39.82 |
| 2.41     | 4.8 | KEDPATLILR                        | iTRAQ4plex@N-term;<br>iTRAQ4plex(K)@1                                                                  |                                                    | 0.0003  | 1442.8704 | 481.9641  | 1442.8700 | 481.9640  | 3 | 33.59 |
| 2.41     | 4.8 | LGVEFK                            | iTRAQ4plex@N-term;<br>iTRAQ4plex(K)@6                                                                  |                                                    | 0.0082  | 979.6028  | 490.8087  | 979.5946  | 490.8046  | 2 | 32.01 |
| 2.41     | 4.8 | VTESMIEK                          | iTRAQ4plex@N-term;<br>iTRAQ4plex(K)@8                                                                  |                                                    | -0.0024 | 1223.6652 | 612.8398  | 1223.6675 | 612.8410  | 2 | 28.23 |
| LIC10857 |     |                                   |                                                                                                        |                                                    |         |           |           |           |           |   |       |
| 2.01     | 1.9 | FEDIVTNVGLSSGNL<br>K              | iTRAQ4plex@N-term;<br>Oxidation(D)@3;<br>Deamidated(N)@14;<br>iTRAQ4plex(K)@17                         |                                                    | 0.0304  | 2084.1184 | 695.7134  | 2084.0881 | 695.7033  | 3 | 39.93 |
| 2.01     | 1.9 | ILSVK                             | iTRAQ4plex@N-term;<br>iTRAQ4plex(K)@5                                                                  | cleaved G-I@N-term                                 | -0.0092 | 846.5691  | 424.2918  | 846.5782  | 424.2964  | 2 | 36.42 |
| 2.01     | 1.9 | NGNIVTIDMGNLK                     | No iTRAQ4plex@N-term;<br>Oxidation(D)@8;<br>iTRAQ4plex(K)@13                                           |                                                    | -0.0527 | 1547.7572 | 516.9263  | 1547.8099 | 516.9439  | 3 | 35.33 |
| 2.01     | 1.9 | NVET                              | No iTRAQ4plex@N-term                                                                                   | cleaved E-N@N-term; cleaved T-T@C-term             | -0.0424 | 461.1698  | 462.1771  | 461.2122  | 462.2195  | 1 | 17.32 |
| 2.01     | 1.9 | SGILSVK                           | No iTRAQ4plex@N-term;<br>iTRAQ4plex(K)@7                                                               | cleaved F-S@N-term                                 | 0.0394  | 846.5691  | 424.2918  | 846.5297  | 424.2721  | 2 | 36.42 |
| 2.01     | 1.9 | SHEAENYYQER                       | iTRAQ4plex@N-term                                                                                      |                                                    | -0.0143 | 1568.6833 | 523.9017  | 1568.6977 | 523.9065  | 3 | 26.51 |
| 2.01     | 1.9 | SRALSYLNDGDVIQTV<br>NGKTISTVGELOK | iTRAQ4plex@N-term;<br>Phospho(T)@15;<br>iTRAQ4plex(K)@19;<br>iTRAQ4plex(K)@29                          | missed R-A@2; missed K-T@19                        | 0.1021  | 3618.0051 | 905.5085  | 3617.9031 | 905.4831  | 4 | 46.89 |
| LIC10858 |     |                                   |                                                                                                        |                                                    |         |           |           |           |           |   |       |
| 1.53     | 2.1 | DDTYQAMR                          | iTRAQ4plex@N-term;<br>Oxidation(R)@8                                                                   | cleaved L-D@N-term                                 | 0.0985  | 1158.6083 | 580.3114  | 1158.5097 | 580.2621  | 2 | 41.17 |
| 1.53     | 2.1 | LKDSSELIGFPIR                     | iTRAQ4plex@N-term;<br>iTRAQ4plex(K)@2                                                                  |                                                    | -0.0180 | 1674.9731 | 559.3317  | 1674.9912 | 559.3377  | 3 | 50.97 |
| 1.53     | 2.1 | SGLPEFADVALAR                     | iTRAQ4plex@N-term                                                                                      | cleaved I-S@N-term                                 | -0.0015 | 1488.8042 | 497.2754  | 1488.8058 | 497.2759  | 3 | 35.43 |
| LIC10862 |     |                                   |                                                                                                        |                                                    |         |           |           |           |           |   |       |
| 6.17     | 3.8 | AFLF                              | iTRAQ4plex@N-term                                                                                      | cleaved L-A@N-term; cleaved F-F@C-term             | 0.0104  | 640.3810  | 641.3883  | 640.3706  | 641.3779  | 1 | 58.72 |
| 6.17     | 3.8 | AGAAK                             | iTRAQ4plex@N-term;<br>iTRAQ4plex(K)@5                                                                  | cleaved G-A@N-term                                 | 0.0331  | 704.4756  | 705.4828  | 704.4425  | 705.4497  | 1 | 58.88 |
| 10.26    | 7.5 | ASGLGFANIK                        | iTRAQ4plex@N-term;<br>iTRAQ4plex(K)@10                                                                 |                                                    | 0.0088  | 1264.7472 | 633.3809  | 1264.7383 | 633.3764  | 2 | 31.49 |

|          |       |      |                                  |                                                                                   |                                                                       |         |           |          |           |          |   |       |
|----------|-------|------|----------------------------------|-----------------------------------------------------------------------------------|-----------------------------------------------------------------------|---------|-----------|----------|-----------|----------|---|-------|
|          | 10.26 | 7.5  | DIMNRPNEK                        | ITRAQ4plex@N-term;<br>ITRAQ4plex(K)@9                                             |                                                                       | -0.0140 | 1403.7294 | 468.9171 | 1403.7435 | 468.9218 | 3 | 27.00 |
|          | 10.26 | 7.5  | DITIFFSDIR                       | ITRAQ4plex@N-term                                                                 |                                                                       | 0.0105  | 1369.7468 | 685.8807 | 1369.7364 | 685.8755 | 2 | 36.29 |
|          | 10.26 | 7.5  | DRVIARELDLIK                     | ITRAQ4plex@N-term; No<br>ITRAQ4plex(K)@12                                         | missed R-V@2; missed R-E@6                                            | 0.0190  | 1583.9670 | 528.9963 | 1583.9481 | 528.9900 | 3 | 35.76 |
|          | 10.26 | 7.5  | DVVDELLK                         | ITRAQ4plex@N-term;<br>ITRAQ4plex(K)@8                                             |                                                                       | -0.9722 | 1216.7390 | 609.3768 | 1217.7111 | 609.8628 | 2 | 36.62 |
|          | 10.26 | 7.5  | EQLFIFIGLIGFR                    | ITRAQ4plex@N-term;<br>Deamidated(Q)@2                                             | cleaved L-E@N-term                                                    | -0.1619 | 1696.8055 | 566.6091 | 1696.9674 | 566.6631 | 3 | 33.46 |
|          | 10.26 | 7.5  | ESEEGTIEYTR                      | ITRAQ4plex@N-term                                                                 |                                                                       | -0.0091 | 1456.6713 | 729.3429 | 1456.6804 | 729.3475 | 2 | 26.75 |
|          | 10.26 | 7.5  | EVVIPADGQMGINF<br>PGGLYSFR       | ITRAQ4plex@N-term                                                                 |                                                                       | -0.0170 | 2809.4060 | 937.4760 | 2809.4231 | 937.4816 | 3 | 46.78 |
|          | 10.26 | 7.5  | EYGTIIISEYTEYKVK<br>DRVIAR       | ITRAQ4plex@N-term;<br>ITRAQ4plex(K)@15;<br>ITRAQ4plex(K)@17;<br>Deamidated(R)@19  | missed K-V@15; missed R-V@19                                          | 0.0428  | 3215.7986 | 536.9737 | 3215.7556 | 536.9665 | 6 | 59.90 |
|          | 6.17  | 3.8  | FFSDIR                           | ITRAQ4plex@N-term                                                                 | cleaved I-F@N-term                                                    | 0.0270  | 927.5206  | 464.7676 | 927.4936  | 464.7541 | 2 | 46.90 |
|          | 10.26 | 7.5  | FKLENVEDPGDAGR                   | ITRAQ4plex@N-term;<br>ITRAQ4plex(K)@2                                             | missed K-L@2                                                          | 0.0150  | 1833.9614 | 612.3278 | 1833.9465 | 612.3228 | 3 | 30.64 |
|          | 10.26 | 7.5  | FTLLRAGVNK                       | ITRAQ4plex@N-term;<br>ITRAQ4plex(K)@10                                            | missed R-A@5                                                          | -0.0997 | 1405.7651 | 469.5957 | 1405.8649 | 469.6289 | 3 | 44.39 |
|          | 10.26 | 7.5  | IYELDLVNEEDLK                    | ITRAQ4plex@N-term;<br>ITRAQ4plex(K)@14                                            |                                                                       | 0.0015  | 1993.0878 | 665.3699 | 1993.0863 | 665.3694 | 3 | 37.95 |
|          | 10.26 | 7.5  | KDESGLNR                         | ITRAQ4plex@N-term;<br>ITRAQ4plex(K)@1;<br>Oxidation(D)@2                          |                                                                       | 0.0420  | 1221.6978 | 611.8561 | 1221.6557 | 611.8351 | 2 | 48.98 |
|          | 10.26 | 7.5  | LATLKEEWK                        | ITRAQ4plex@N-term;<br>ITRAQ4plex(K)@5;<br>ITRAQ4plex(K)@9                         |                                                                       | -0.0226 | 1548.9016 | 517.3078 | 1548.9241 | 517.3153 | 3 | 34.13 |
|          | 10.26 | 7.5  | LENVEDPGDAGR                     | ITRAQ4plex@N-term                                                                 |                                                                       | 0.0608  | 1414.7418 | 708.3782 | 1414.6810 | 708.3478 | 2 | 27.54 |
|          | 6.17  | 3.8  | LKLLRK                           | ITRAQ4plex@N-term;<br>ITRAQ4plex(K)@2;<br>Deamidated(R)@5;<br>ITRAQ4plex(K)@6     | cleaved D-L@N-term; cleaved K-P@C-term;<br>missed K-L@2; missed R-K@5 | 0.0536  | 1202.8976 | 602.4561 | 1202.8440 | 602.4293 | 2 | 54.38 |
|          | 10.26 | 7.5  | REVVIPIDAGQMGIN<br>FPGGLYSFR     | ITRAQ4plex@N-term                                                                 | missed R-E@1                                                          | 0.0577  | 2965.5820 | 989.5346 | 2965.5242 | 989.5153 | 3 | 41.55 |
|          | 6.17  | 3.8  | RIEILR                           | ITRAQ4plex@N-term                                                                 | missed R-I@1                                                          | 0.0089  | 942.6185  | 472.3165 | 942.6096  | 472.3121 | 2 | 44.48 |
|          | 6.17  | 3.8  | SSILNLEKRIEILR                   | No ITRAQ4plex@N-term;<br>Deamidated(N)@5;<br>ITRAQ4plex(K)@8;<br>Deamidated(R)@14 | missed K-R@8; missed R-I@9                                            | -0.0514 | 1829.0231 | 915.5188 | 1829.0744 | 915.5445 | 2 | 47.52 |
|          | 6.17  | 3.8  | VIAR                             | ITRAQ4plex@N-term                                                                 |                                                                       | 0.1089  | 601.5123  | 602.5195 | 601.4033  | 602.4106 | 1 | 53.09 |
|          | 10.26 | 7.5  | WPLPWK                           | ITRAQ4plex@N-term;<br>ITRAQ4plex(K)@6                                             |                                                                       | 0.0086  | 1113.6665 | 557.8405 | 1113.6579 | 557.8362 | 2 | 34.61 |
|          | 6.17  | 3.8  | YYANIIDFK                        | ITRAQ4plex@N-term;<br>ITRAQ4plex(K)@10                                            |                                                                       | -0.0120 | 1546.8519 | 774.4332 | 1546.8639 | 774.4392 | 2 | 50.98 |
| LIC10873 |       |      |                                  |                                                                                   |                                                                       |         |           |          |           |          |   |       |
|          | 2     | 8.9  | LTQSYNDNKPIEWIK                  | ITRAQ4plex@N-term;<br>ITRAQ4plex(K)@9;<br>ITRAQ4plex(K)@15                        |                                                                       | -0.0332 | 2280.2148 | 761.0789 | 2280.2480 | 761.0899 | 3 | 32.96 |
|          | 3.7   | 17.3 | VHDMPDHVQFNHSR                   | CarbamyI@N-term;<br>Deamidated(N)@11                                              |                                                                       | 0.0065  | 1761.7706 | 588.2642 | 1761.7642 | 588.2620 | 3 | 44.03 |
| LIC10874 |       |      |                                  |                                                                                   |                                                                       |         |           |          |           |          |   |       |
|          | 55.19 | 31.6 | AAESVPTMTGSNADL<br>R             | No ITRAQ4plex@N-term                                                              | cleaved I-A@N-term                                                    | 0.0404  | 1618.8025 | 540.6081 | 1618.7621 | 540.5946 | 3 | 37.47 |
|          | 55.19 | 31.6 | AANNAHLQELPD                     | ITRAQ4plex@N-term                                                                 | cleaved D-P@C-term                                                    | 0.0007  | 1435.7185 | 718.8665 | 1435.7177 | 718.8661 | 2 | 28.86 |
|          | 55.19 | 31.6 | AANNAHLQELPDPVT<br>K             | ITRAQ4plex@N-term;<br>Deamidated(N)@4;<br>ITRAQ4plex(K)@16                        |                                                                       | -0.0148 | 2006.0527 | 669.6915 | 2006.0676 | 669.6965 | 3 | 30.50 |
|          | 55.19 | 31.6 | ADETALSSNVLATTTH<br>FLESWGDAEVTK | ITRAQ4plex@N-term;<br>ITRAQ4plex(K)@28                                            |                                                                       | 0.0378  | 3280.6721 | 821.1753 | 3280.6343 | 821.1659 | 4 | 1.01  |
|          | 55.19 | 31.6 | AIRPGDQTK                        | ITRAQ4plex@N-term;<br>ITRAQ4plex(K)@9                                             | cleaved L-A@N-term                                                    | -0.0594 | 1272.6799 | 425.2339 | 1272.7394 | 425.2537 | 3 | 26.99 |
|          | 55.19 | 31.6 | ALNGA                            | No ITRAQ4plex@N-term                                                              | cleaved D-A@N-term; cleaved A-T@C-term                                | 0.0235  | 444.2567  | 445.2640 | 444.2332  | 445.2405 | 1 | 31.56 |
|          | 55.19 | 31.6 | ALWSNK                           | ITRAQ4plex@N-term;<br>ITRAQ4plex(K)@6                                             |                                                                       | 0.0057  | 1005.5908 | 503.8027 | 1005.5851 | 503.7998 | 2 | 29.61 |
|          | 55.19 | 31.6 | APRYLGLNPEVAVR                   | ITRAQ4plex@N-term;<br>Oxidation(P)@2;<br>Deamidated(N)@8                          | missed R-Y@3                                                          | 0.0273  | 1714.9761 | 572.6660 | 1714.9488 | 572.6569 | 3 | 31.05 |
|          | 55.19 | 31.6 | APSEIPK                          | ITRAQ4plex@N-term;<br>ITRAQ4plex(K)@7                                             |                                                                       | 0.0066  | 1028.6176 | 515.3160 | 1028.6110 | 515.3128 | 2 | 26.77 |
|          | 55.19 | 31.6 | AQNPATIEGGIEVK                   | ITRAQ4plex@N-term;<br>ITRAQ4plex(K)@14                                            |                                                                       | 0.0086  | 1713.9591 | 857.9868 | 1713.9505 | 857.9825 | 2 | 45.40 |
|          | 55.19 | 31.6 | DAIAIAGYGR                       | ITRAQ4plex@N-term                                                                 |                                                                       | 0.0139  | 1248.7087 | 625.3616 | 1248.6948 | 625.3547 | 2 | 52.59 |
|          | 55.19 | 31.6 | DALNGATLSALVSELG<br>VSEENIR      | ITRAQ4plex@N-term;<br>Deamidated(N)@4                                             |                                                                       | -0.0165 | 2502.2771 | 835.0996 | 2502.2935 | 835.1051 | 3 | 39.05 |

|       |      |                          |                                                                                 |                                   |         |           |          |           |          |   |       |
|-------|------|--------------------------|---------------------------------------------------------------------------------|-----------------------------------|---------|-----------|----------|-----------|----------|---|-------|
| 55.19 | 31.6 | DAVDLQILVNLNSVL<br>ENDGK | ITRAQ4plex@N-term;<br>ITRAQ4plex(K)@21                                          |                                   | -0.0135 | 2569.4072 | 857.4763 | 2569.4207 | 857.4808 | 3 | 5.15  |
| 55.19 | 31.6 | DSPSTQSIIGDFLR           | ITRAQ4plex@N-term                                                               | cleaved L-D@N-term                | 0.0013  | 1678.8661 | 840.4403 | 1678.8648 | 840.4397 | 2 | 35.52 |
| 55.19 | 31.6 | EGLADSSGNLK              | Glu->pyro-Glu@N-term;<br>ITRAQ4plex(K)@11                                       |                                   | 0.0000  | 1215.6217 | 608.8181 | 1215.6217 | 608.8181 | 2 | 37.01 |
| 55.19 | 31.6 | EMHWLR                   | ITRAQ4plex@N-term                                                               |                                   | 0.0181  | 1014.5372 | 508.2759 | 1014.5191 | 508.2668 | 2 | 59.56 |
| 55.19 | 31.6 | FNWMQHWYNDFGWK           | ITRAQ4plex@N-term;<br>ITRAQ4plex(K)@14                                          |                                   | -0.0117 | 2246.0283 | 749.6834 | 2246.0400 | 749.6873 | 3 | 41.20 |
| 55.19 | 31.6 | GIFSIQQPAIR              | ITRAQ4plex@N-term                                                               | cleaved R-P@C-term                | -0.0321 | 1372.7628 | 687.3887 | 1372.7949 | 687.4047 | 2 | 31.97 |
| 55.19 | 31.6 | GIFSIQQPAIRPLFNSR        | ITRAQ4plex@N-term                                                               |                                   | 0.0103  | 2087.1865 | 696.7361 | 2087.1762 | 696.7327 | 3 | 34.89 |
| 55.19 | 31.6 | GISSNDVLVLK              | ITRAQ4plex@N-term;<br>Deamidated(N)@5;<br>ITRAQ4plex(K)@11                      |                                   | -0.0084 | 1432.8297 | 717.4221 | 1432.8381 | 717.4263 | 2 | 31.09 |
| 55.19 | 31.6 | GLNPEVAVRGR              | ITRAQ4plex@N-term;<br>Deamidated(N)@3;<br>Deamidated(R)@9                       | cleaved L-G@N-term; missed R-G@9  | -0.0239 | 1312.6982 | 657.3564 | 1312.7221 | 657.3683 | 2 | 53.57 |
| 55.19 | 31.6 | IRPGDQTK                 | ITRAQ4plex@N-term;<br>ITRAQ4plex(K)@8                                           | cleaved A-I@N-term                | -0.0531 | 1201.6490 | 401.5570 | 1201.7023 | 401.5747 | 3 | 26.64 |
| 55.19 | 31.6 | IVPYVDLNK                | ITRAQ4plex@N-term;<br>ITRAQ4plex(K)@9                                           |                                   | 0.0023  | 1347.8030 | 674.9088 | 1347.8006 | 674.9076 | 2 | 31.92 |
| 55.19 | 31.6 | KDPASGK                  | ITRAQ4plex@N-term;<br>ITRAQ4plex(K)@1;<br>ITRAQ4plex(K)@7                       |                                   | 0.0171  | 1133.6942 | 567.8544 | 1133.6770 | 567.8458 | 2 | 47.01 |
| 55.19 | 31.6 | LAIRPGDQTK               | ITRAQ4plex@N-term;<br>ITRAQ4plex(K)@10                                          |                                   | -0.0069 | 1385.8165 | 462.9461 | 1385.8234 | 462.9484 | 3 | 27.98 |
| 55.19 | 31.6 | LALAIAAALGELGANT<br>K    | ITRAQ4plex@N-term;<br>ITRAQ4plex(K)@17                                          |                                   | 0.0152  | 1884.1440 | 629.0553 | 1884.1288 | 629.0502 | 3 | 2.21  |
| 55.19 | 31.6 | LGLNPEVAVR               | ITRAQ4plex@N-term                                                               | cleaved Y-L@N-term                | -0.0084 | 1210.7073 | 606.3609 | 1210.7156 | 606.3651 | 2 | 30.18 |
| 55.19 | 31.6 | LGLNPEVAVRGR             | ITRAQ4plex@N-term;<br>Deamidated(N)@4;<br>Deamidated(R)@10                      | cleaved Y-L@N-term; missed R-G@10 | 0.0368  | 1425.8430 | 476.2883 | 1425.8062 | 476.2760 | 3 | 44.92 |
| 55.19 | 31.6 | LIARIK                   | ITRAQ4plex@N-term;<br>ITRAQ4plex(K)@6                                           | cleaved P-L@N-term; missed R-I@4  | -0.0053 | 1000.6948 | 501.3546 | 1000.7001 | 501.3573 | 2 | 42.55 |
| 55.19 | 31.6 | LLDSPSTQSIIGDFLR         | ITRAQ4plex@N-term                                                               |                                   | 0.0005  | 1905.0334 | 953.5240 | 1905.0329 | 953.5237 | 2 | 37.73 |
| 55.19 | 31.6 | LMGAGVAMTSLNCIR<br>K     | ITRAQ4plex@N-term;<br>Oxidation(N)@12;<br>Methylthio(C)@13;<br>ITRAQ4plex(K)@16 | cleaved K-P@C-term; missed R-K@15 | -0.0077 | 2014.0361 | 672.3527 | 2014.0439 | 672.3553 | 3 | 45.16 |
| 55.19 | 31.6 | LRPNGSLK                 | ITRAQ4plex@N-term;<br>Deamidated(N)@4;<br>ITRAQ4plex(K)@8                       | cleaved N-L@N-term                | -0.0168 | 1172.6953 | 587.3549 | 1172.7121 | 587.3633 | 2 | 28.04 |
| 55.19 | 31.6 | LSLFETIAIGDGK            | ITRAQ4plex@N-term;<br>ITRAQ4plex(K)@13                                          |                                   | -0.0096 | 1650.9341 | 826.4743 | 1650.9436 | 826.4791 | 2 | 51.49 |
| 55.19 | 31.6 | LTWDCILLSPALAK           | ITRAQ4plex@N-term;<br>Methylthio(C)@6;<br>ITRAQ4plex(K)@15                      |                                   | 0.0037  | 1991.0864 | 664.7028 | 1991.0828 | 664.7015 | 3 | 38.48 |
| 55.19 | 31.6 | NGSLK                    | ITRAQ4plex@N-term;<br>Deamidated(N)@1;<br>ITRAQ4plex(K)@5                       | cleaved P-N@N-term                | 0.1163  | 806.5905  | 404.3025 | 806.4742  | 404.2444 | 2 | 19.05 |
| 55.19 | 31.6 | NLLHQAALVVLSLDR          | ITRAQ4plex@N-term                                                               |                                   | -0.0098 | 1779.0027 | 594.0082 | 1779.0125 | 594.0114 | 3 | 51.18 |
| 55.19 | 31.6 | NLRPNGSLK                | ITRAQ4plex@N-term;<br>Deamidated(N)@5;<br>ITRAQ4plex(K)@9                       |                                   | 0.0041  | 1286.7592 | 429.9270 | 1286.7550 | 429.9256 | 3 | 28.55 |
| 55.19 | 31.6 | NSWIK                    | ITRAQ4plex@N-term;<br>ITRAQ4plex(K)@5                                           |                                   | 0.0142  | 934.5623  | 468.2884 | 934.5480  | 468.2813 | 2 | 33.49 |
| 55.19 | 31.6 | NWEDLLR                  | ITRAQ4plex@N-term                                                               |                                   | -0.0149 | 1088.5587 | 545.2866 | 1088.5736 | 545.2941 | 2 | 33.13 |
| 55.19 | 31.6 | QTIELPAIQPGMHK           | ITRAQ4plex@N-term;<br>ITRAQ4plex(K)@15                                          |                                   | -0.0071 | 1978.0844 | 660.3687 | 1978.0914 | 660.3711 | 3 | 32.13 |
| 55.19 | 31.6 | QVAYLTRVR                | ITRAQ4plex@N-term                                                               | cleaved P-Q@N-term; missed R-V@7  | -0.0297 | 1248.7128 | 417.2449 | 1248.7424 | 417.2548 | 3 | 43.56 |
| 55.19 | 31.6 | SALAANK                  | ITRAQ4plex@N-term;<br>ITRAQ4plex(K)@7                                           |                                   | 0.0196  | 961.5997  | 481.8071 | 961.5800  | 481.7973 | 2 | 24.61 |
| 55.19 | 31.6 | SDWATVDAK                | ITRAQ4plex@N-term;<br>ITRAQ4plex(K)@9                                           |                                   | -0.9785 | 1278.6868 | 640.3506 | 1279.6652 | 640.8399 | 2 | 29.34 |
| 55.19 | 31.6 | SLVVAGSLAATTK            | ITRAQ4plex@N-term;<br>ITRAQ4plex(K)@13                                          |                                   | 1.9196  | 1506.8264 | 754.4205 | 1504.9068 | 753.4607 | 2 | 57.13 |
| 55.19 | 31.6 | TAAGAVGTGVGK             | ITRAQ4plex@N-term;<br>ITRAQ4plex(K)@12                                          |                                   | 0.0055  | 1275.7445 | 638.8795 | 1275.7390 | 638.8768 | 2 | 25.23 |
| 55.19 | 31.6 | TAAGAVGTGVGKNAY          | ITRAQ4plex@N-term;<br>ITRAQ4plex(T)@1;<br>ITRAQ4plex(K)@12                      | cleaved Y-I@C-term; missed K-N@12 | -0.0077 | 1767.9767 | 590.3328 | 1767.9845 | 590.3354 | 3 | 32.47 |
| 55.19 | 31.6 | TGTTVTASER               | ITRAQ4plex@N-term                                                               |                                   | 0.0052  | 1165.6113 | 583.8129 | 1165.6061 | 583.8103 | 2 | 18.73 |
| 55.19 | 31.6 | VGVLFVNDVNLVYQA<br>GEEWK | ITRAQ4plex@N-term;<br>Deamidated(N)@7;<br>Oxidation(W)@19;<br>ITRAQ4plex(K)@20  |                                   | -0.0885 | 2583.2581 | 646.8218 | 2583.3464 | 646.8439 | 4 | 39.20 |



|          |       |      |                            |                                                                          |                                                          |         |           |          |           |          |   |       |
|----------|-------|------|----------------------------|--------------------------------------------------------------------------|----------------------------------------------------------|---------|-----------|----------|-----------|----------|---|-------|
|          | 55.19 | 31.6 | VLEYLVNVPQVAYLTR           | ITRAQ4plex@N-term                                                        |                                                          | -0.0022 | 1978.0988 | 990.0566 | 1978.1009 | 990.0577 | 2 | 36.01 |
|          | 55.19 | 31.6 | VPYVDLNK                   | ITRAQ4plex@N-term;<br>ITRAQ4plex(K)@8                                    | cleaved I-V@N-term                                       | 0.0028  | 1234.7194 | 618.3669 | 1234.7165 | 618.3655 | 2 | 30.35 |
|          | 55.19 | 31.6 | YGLGNPEVAVR                | ITRAQ4plex@N-term                                                        |                                                          | 0.0124  | 1373.7913 | 687.9029 | 1373.7789 | 687.8967 | 2 | 32.07 |
|          | 55.19 | 31.6 | YGLGNPEVAVRGR              | No ITRAQ4plex@N-term;<br>Oxidation(R)@11                                 | missed R-G@11                                            | 0.0715  | 1458.8658 | 487.2959 | 1458.7943 | 487.2720 | 3 | 57.25 |
|          | 55.19 | 31.6 | YYIGDPDQPETLQVAHQPM        | ITRAQ4plex@N-term                                                        | cleaved M-L@C-term                                       | -0.0105 | 2345.1016 | 782.7078 | 2345.1120 | 782.7113 | 3 | 33.82 |
|          | 39.46 | 20.4 | AAAKIAAK                   | ITRAQ4plex@N-term;<br>ITRAQ4plex(K)@4;<br>ITRAQ4plex(K)@8                | cleaved I-A@N-term; missed K-I@4                         | -0.1490 | 1174.6273 | 588.3209 | 1174.7763 | 588.3954 | 2 | 35.37 |
|          | 39.46 | 20.4 | AAGAVGTGVGK                | ITRAQ4plex@N-term;<br>ITRAQ4plex(K)@11                                   | cleaved T-A@N-term                                       | -0.0571 | 1174.6343 | 588.3244 | 1174.6914 | 588.3530 | 2 | 35.72 |
|          | 39.46 | 20.4 | GRTAAGAVGTGVGK             | Methylthio@N-term; Arg->GluSA(R)@2;<br>ITRAQ4plex(K)@14                  | cleaved Y-G@N-term; missed R-T@2                         | 0.0740  | 1347.7678 | 674.8912 | 1347.6938 | 674.8542 | 2 | 33.86 |
|          | 39.46 | 20.4 | PSEIPK                     | No ITRAQ4plex@N-term;<br>ITRAQ4plex(K)@6                                 | cleaved A-P@N-term                                       | -0.0078 | 813.4641  | 407.7393 | 813.4718  | 407.7432 | 2 | 36.72 |
|          | 39.46 | 20.4 | RNWEDLLR                   | CarbamyI@N-term                                                          | missed R-N@1                                             | 0.0098  | 1143.5884 | 572.8015 | 1143.5785 | 572.7965 | 2 | 45.85 |
|          | 39.46 | 20.4 | RYLGNLPEVAVR               | No ITRAQ4plex@N-term;<br>Oxidation(Y)@2; Methyl(L)@3;<br>Deamidated(N)@6 | cleaved P-R@N-term; missed R-Y@1                         | 0.0073  | 1416.7798 | 709.3972 | 1416.7725 | 709.3935 | 2 | 43.17 |
|          | 39.46 | 20.4 | SGEFDRK                    | ITRAQ4plex@N-term;<br>Oxidation(D)@5; Arg->Om(R)@6;<br>ITRAQ4plex(K)@7   | missed R-K@6                                             | -0.0055 | 1099.5699 | 550.7922 | 1099.5753 | 550.7949 | 2 | 43.77 |
|          | 39.46 | 20.4 | SLLAELK                    | ITRAQ4plex@N-term;<br>ITRAQ4plex(K)@7                                    |                                                          | 0.0154  | 1018.6421 | 510.3283 | 1018.6266 | 510.3206 | 2 | 39.85 |
| LIC10875 |       |      |                            |                                                                          |                                                          |         |           |          |           |          |   |       |
|          | 3.1   | 3.3  | AFLLVLTITVVDL              | ITRAQ4plex@N-term                                                        | cleaved L-G@C-term                                       | 0.0032  | 1559.9692 | 520.9970 | 1559.9660 | 520.9959 | 3 | 40.14 |
|          | 3.1   | 3.3  | GTFGIFFTLFLFCRI            | ITRAQ4plex@N-term;<br>Methylthio(C)@14                                   | cleaved I-G@N-term; cleaved I-M@C-term;<br>missed R-I@15 | 0.0071  | 2084.1184 | 695.7134 | 2084.1113 | 695.7110 | 3 | 39.93 |
|          | 3.1   | 3.3  | KLYDVLALGWVGSNK            | ITRAQ4plex@N-term;<br>ITRAQ4plex(K)@1;<br>ITRAQ4plex(K)@15               | missed K-L@1                                             | 0.0432  | 2094.2634 | 699.0951 | 2094.2203 | 699.0807 | 3 | 44.23 |
| LIC10876 |       |      |                            |                                                                          |                                                          |         |           |          |           |          |   |       |
|          | 9.4   | 30.6 | FALWIPSSSK                 | ITRAQ4plex@N-term;<br>ITRAQ4plex(K)@10                                   |                                                          | -0.0131 | 1422.7985 | 712.4065 | 1422.8115 | 712.4130 | 2 | 33.86 |
|          | 9.4   | 30.6 | FEETSSGVFLFDTPAEIISAAK     | ITRAQ4plex@N-term;<br>ITRAQ4plex(K)@24                                   |                                                          | 0.0084  | 2774.4341 | 925.8187 | 2774.4258 | 925.8159 | 3 | 47.68 |
|          | 9.4   | 30.6 | GYPEDEVLNFIK               | ITRAQ4plex@N-term;<br>ITRAQ4plex(K)@3;<br>ITRAQ4plex(K)@12               |                                                          | -0.0115 | 1886.0399 | 629.6873 | 1886.0515 | 629.6911 | 3 | 36.16 |
|          | 9.4   | 30.6 | HPDITTDK                   | ITRAQ4plex@N-term;<br>ITRAQ4plex(K)@8                                    | cleaved L-H@N-term                                       | -0.0106 | 1213.6440 | 405.5553 | 1213.6546 | 405.5588 | 3 | 26.69 |
|          | 9.4   | 30.6 | LHPDITTDK                  | ITRAQ4plex@N-term;<br>ITRAQ4plex(K)@9                                    | cleaved V-L@N-term                                       | 0.0049  | 1326.7437 | 443.2552 | 1326.7387 | 443.2535 | 3 | 28.29 |
|          | 9.4   | 30.6 | VLHPDITTDK                 | ITRAQ4plex@N-term;<br>ITRAQ4plex(K)@10                                   |                                                          | -0.0014 | 1425.8057 | 476.2758 | 1425.8071 | 476.2763 | 3 | 38.78 |
|          | 6.14  | 24.0 | YVEVVK                     | ITRAQ4plex@N-term;<br>ITRAQ4plex(K)@6                                    |                                                          | -0.0029 | 1023.6179 | 512.8162 | 1023.6208 | 512.8177 | 2 | 38.93 |
| LIC10877 |       |      |                            |                                                                          |                                                          |         |           |          |           |          |   |       |
|          | 16.68 | 59.1 | ADSPAREAQEAD               | No ITRAQ4plex@N-term                                                     | cleaved M-A@N-term; cleaved D-P@C-term; missed R-E@6     | 0.0711  | 1258.6136 | 630.3141 | 1258.5426 | 630.2786 | 2 | 39.95 |
|          | 16.68 | 59.1 | DDLANLQRGEAK               | ITRAQ4plex@N-term;<br>ITRAQ4plex(K)@12                                   | missed R-G@8                                             | -0.0024 | 1616.8701 | 539.9640 | 1616.8726 | 539.9648 | 3 | 29.76 |
|          | 15.6  | 52.8 | DMADSPAREAQEADPIAHGGAASR   | ITRAQ4plex@N-term                                                        | cleaved P-D@N-term; missed R-E@8                         | 3.4926  | 2627.6934 | 876.9050 | 2624.2007 | 875.7408 | 3 | 35.91 |
|          | 16.68 | 59.1 | EAQEAADPIAHGGAASR          | Glu->pyro-Glu@N-term                                                     |                                                          | 0.0012  | 1618.7347 | 810.3746 | 1618.7336 | 810.3741 | 2 | 39.91 |
|          | 15.6  | 52.8 | FPDMADSPAREAQEADPIAHGGAASR | ITRAQ4plex@N-term                                                        | cleaved Y-F@N-term; missed R-E@10                        | -5.4927 | 2862.8291 | 573.5731 | 2868.3219 | 574.6717 | 5 | 35.95 |
|          | 16.68 | 59.1 | GAGNGTIVGP                 | ITRAQ4plex@N-term;<br>Deamidated(N)@4                                    | cleaved P-A@C-term                                       | -0.0200 | 986.4955  | 494.2550 | 986.5155  | 494.2650 | 2 | 29.26 |
|          | 16.68 | 59.1 | GAGNGTIVGPAPR              | ITRAQ4plex@N-term;<br>Deamidated(N)@4                                    |                                                          | -0.0025 | 1310.7040 | 656.3593 | 1310.7064 | 656.3605 | 2 | 26.54 |
|          | 16.68 | 59.1 | GAGNGTIVGPAPRIGFP          | ITRAQ4plex@N-term;<br>Oxidation(P)@12                                    | cleaved P-V@C-term; missed R-I@13                        | -0.0038 | 1739.9403 | 580.9874 | 1739.9441 | 580.9886 | 3 | 27.03 |
|          | 16.68 | 59.1 | GAVPVGYYPYELGLDVSQPNK      | ITRAQ4plex@N-term;<br>ITRAQ4plex(K)@23                                   |                                                          | -0.0081 | 2829.4751 | 944.1656 | 2829.4833 | 944.1684 | 3 | 36.15 |
|          | 16.68 | 59.1 | GLGNPFK                    | ITRAQ4plex@N-term;<br>ITRAQ4plex(K)@7                                    |                                                          | -0.0085 | 1019.5923 | 510.8034 | 1019.6007 | 510.8077 | 2 | 30.63 |
|          | 16.68 | 59.1 | GLGNPFKDDLNLQR             | ITRAQ4plex@N-term;<br>ITRAQ4plex(K)@7                                    |                                                          | -0.0028 | 1945.0598 | 649.3605 | 1945.0625 | 649.3614 | 3 | 51.13 |

|          |       |      |                                |                                                                                                                       |                                                    |         |           |           |           |           |   |       |
|----------|-------|------|--------------------------------|-----------------------------------------------------------------------------------------------------------------------|----------------------------------------------------|---------|-----------|-----------|-----------|-----------|---|-------|
|          | 16.68 | 59.1 | IGFPVPAVISPK                   | ITRAQ4plex@N-term;<br>ITRAQ4plex(K)@12                                                                                |                                                    | -0.0258 | 1511.9061 | 756.9603  | 1511.9319 | 756.9732  | 2 | 33.76 |
|          | 16.68 | 59.1 | IQQYSDGQIYHVVTAG<br>WGR        | ITRAQ4plex@N-term                                                                                                     |                                                    | -0.0051 | 2250.1252 | 751.0490  | 2250.1303 | 751.0507  | 3 | 34.29 |
|          | 15.6  | 52.8 | IVLYVR                         | ITRAQ4plex@N-term                                                                                                     |                                                    | 0.0002  | 905.5822  | 453.7984  | 905.5820  | 453.7983  | 2 | 42.48 |
|          | 16.68 | 59.1 | LQEYENRTK                      | ITRAQ4plex@N-term;<br>Oxidation(Y)@4; Oxidation(N)@6;<br>Deamidated(R)@7;<br>ITRAQ4plex(K)@9                          | missed R-T@7                                       | 0.0787  | 1500.8451 | 501.2890  | 1500.7664 | 501.2627  | 3 | 28.59 |
|          | 16.68 | 59.1 | PDMADSPAR                      | No ITRAQ4plex@N-term                                                                                                  | cleaved F-P@N-term                                 | 0.0164  | 958.4343  | 480.2244  | 958.4178  | 480.2162  | 2 | 33.85 |
|          | 16.68 | 59.1 | PIAHDGAASR                     | No ITRAQ4plex@N-term                                                                                                  | cleaved D-P@N-term                                 | 0.0015  | 993.5007  | 497.7576  | 993.4992  | 497.7569  | 2 | 25.96 |
|          | 16.68 | 59.1 | RGAGNGTIVGPAPRIG<br>FPVPAVISPK | ITRAQ4plex@N-term;<br>ITRAQ4plex(K)@26                                                                                | cleaved V-R@N-term; missed R-G@1;<br>missed R-I@14 | 0.0667  | 2815.7095 | 704.9346  | 2815.6428 | 704.9180  | 4 | 34.96 |
|          | 15.6  | 52.8 | SYASQVSPEDR                    | ITRAQ4plex@N-term                                                                                                     |                                                    | 0.0005  | 1381.6600 | 691.8373  | 1381.6596 | 691.8371  | 2 | 34.40 |
|          | 16.68 | 59.1 | TPPLEYFPDMADSPA<br>R           | ITRAQ4plex@N-term                                                                                                     |                                                    | 0.0012  | 1949.9327 | 975.9736  | 1949.9315 | 975.9730  | 2 | 35.83 |
| LIC10878 |       |      |                                |                                                                                                                       |                                                    |         |           |           |           |           |   |       |
|          | 4.36  | 4.4  | DQALHHHQ                       | No ITRAQ4plex@N-term                                                                                                  | cleaved L-D@N-term                                 | -0.0101 | 984.4425  | 493.2285  | 984.4526  | 493.2336  | 2 | 39.77 |
|          | 7.16  | 10.1 | FVFPLLLLLRPNK                  | ITRAQ4plex@N-term;<br>ITRAQ4plex(K)@14                                                                                |                                                    | -0.0511 | 2005.1610 | 669.3943  | 2005.2121 | 669.4113  | 3 | 44.36 |
|          | 7.16  | 10.1 | KPLLNVFFVAR                    | ITRAQ4plex@N-term;<br>ITRAQ4plex(K)@1                                                                                 |                                                    | 0.0056  | 1688.0438 | 563.6885  | 1688.0381 | 563.6866  | 3 | 35.80 |
|          | 4.36  | 4.4  | LDQALHHHQ                      | Carbamyl@N-term                                                                                                       |                                                    | -0.0227 | 1140.5198 | 571.2672  | 1140.5425 | 571.2785  | 2 | 39.66 |
|          | 7.16  | 10.1 | QDQDKDVSHQTQFNAR               | Gln->pyro-Glu@N-term;<br>ITRAQ4plex(K)@5                                                                              |                                                    | -0.0055 | 1914.8888 | 639.3035  | 1914.8942 | 639.3053  | 3 | 27.17 |
|          | 7.16  | 10.1 | STLVIMYFLK                     | ITRAQ4plex@N-term;<br>Oxidation(M)@6;<br>ITRAQ4plex(K)@11                                                             | cleaved L-S@N-term                                 | -0.0017 | 1630.9594 | 544.6604  | 1630.9612 | 544.6610  | 3 | 44.46 |
|          | 7.16  | 10.1 | VEQNLFNK                       | ITRAQ4plex@N-term;<br>ITRAQ4plex(K)@9                                                                                 |                                                    | -0.0111 | 1391.7906 | 696.9026  | 1391.8016 | 696.9081  | 2 | 31.59 |
| LIC10879 |       |      |                                |                                                                                                                       |                                                    |         |           |           |           |           |   |       |
|          | 3.61  | 8.2  | DKVPLAELAPLK                   | ITRAQ4plex@N-term;<br>ITRAQ4plex(K)@2;<br>ITRAQ4plex(K)@13                                                            | missed K-V@2                                       | -0.0296 | 1854.0895 | 619.0371  | 1854.1192 | 619.0470  | 3 | 38.31 |
|          | 3.61  | 8.2  | DYASLPK                        | ITRAQ4plex@N-term;<br>ITRAQ4plex(Y)@2;<br>ITRAQ4plex(K)@7                                                             |                                                    | -0.0161 | 1224.6918 | 409.2379  | 1224.7080 | 409.2433  | 3 | 28.91 |
|          | 3.61  | 8.2  | LAQVTNPK                       | ITRAQ4plex@N-term;<br>ITRAQ4plex(K)@8                                                                                 |                                                    | -0.0186 | 1197.6887 | 400.2368  | 1197.7073 | 400.2431  | 3 | 27.27 |
|          | 6.13  | 18.2 | LLNAS                          | No ITRAQ4plex@N-term                                                                                                  | cleaved S-L@N-term; cleaved S-L@C-term             | 0.0214  | 516.3121  | 517.3194  | 516.2908  | 517.2980  | 1 | 57.98 |
|          | 6.13  | 18.2 | NHQANPKPFVR                    | Carbamyl@N-term;<br>ITRAQ4plex(K)@7                                                                                   |                                                    | -0.0091 | 1493.7882 | 498.9367  | 1493.7973 | 498.9397  | 3 | 36.73 |
|          | 6.13  | 18.2 | NHQANPKPFVRVK                  | ITRAQ4plex@N-term;<br>Deamidated(N)@1;<br>ITRAQ4plex(K)@7;<br>Oxidation(P)@8;<br>Oxidation(R)@11;<br>ITRAQ4plex(K)@13 | missed R-V@11                                      | -0.2174 | 1998.9155 | 1000.4650 | 1999.1329 | 1000.5737 | 2 | 29.28 |
|          | 3.61  | 8.2  | SVFTWGYR                       | ITRAQ4plex@N-term                                                                                                     |                                                    | 0.0057  | 1158.6001 | 580.3073  | 1158.5944 | 580.3045  | 2 | 32.44 |
|          | 6.13  | 18.2 | VEGWMNPR                       | ITRAQ4plex@N-term                                                                                                     |                                                    | 0.0017  | 1131.5635 | 566.7890  | 1131.5617 | 566.7881  | 2 | 40.85 |
| LIC10900 |       |      |                                |                                                                                                                       |                                                    |         |           |           |           |           |   |       |
|          | 1.6   | 3.0  | DDQYYLGSFRR                    | ITRAQ4plex@N-term                                                                                                     | missed R-R@10                                      | 0.0033  | 1562.7632 | 782.3889  | 1562.7599 | 782.3872  | 2 | 36.94 |
|          | 2.01  | 3.4  | HSDS                           | No ITRAQ4plex@N-term                                                                                                  | cleaved A-H@N-term; cleaved S-K@C-term             | -0.0319 | 444.1286  | 445.1359  | 444.1605  | 445.1678  | 1 | 4.08  |
|          | 2.01  | 3.4  | ITGN                           | No ITRAQ4plex@N-term                                                                                                  | cleaved L-I@N-term; cleaved N-S@C-term             | 0.0052  | 403.2119  | 404.2191  | 403.2067  | 404.2140  | 1 | 46.98 |
|          | 2.01  | 3.4  | LDSFK                          | ITRAQ4plex@N-term;<br>ITRAQ4plex(K)@5                                                                                 | cleaved I-L@N-term                                 | 0.0062  | 896.5273  | 449.2709  | 896.5211  | 449.2678  | 2 | 29.80 |
|          | 2.01  | 3.4  | LEYTVIGDVTNLSAR                | ITRAQ4plex@N-term;<br>Oxidation(D)@8;<br>Deamidated(N)@11                                                             |                                                    | -0.0294 | 1810.9141 | 906.4643  | 1810.9434 | 906.4790  | 2 | 35.46 |
|          | 2.01  | 3.4  | LILQPTDLKDEPIVK                | ITRAQ4plex@N-term;<br>ITRAQ4plex(K)@9;<br>ITRAQ4plex(K)@15                                                            |                                                    | -0.0069 | 2153.2969 | 718.7729  | 2153.3037 | 718.7752  | 3 | 33.34 |
|          | 2.01  | 3.4  | NLLESASINGQTR                  | No ITRAQ4plex@N-term                                                                                                  |                                                    | -0.0253 | 1401.6959 | 701.8552  | 1401.7212 | 701.8679  | 2 | 27.97 |
|          | 2.01  | 3.4  | QFNK                           | ITRAQ4plex@N-term;<br>Deamidated(Q)@1;<br>ITRAQ4plex(K)@4                                                             | cleaved I-Q@N-term                                 | 0.0022  | 824.4659  | 413.2402  | 824.4636  | 413.2391  | 2 | 25.26 |
|          | 1.6   | 3.0  | SILAALDMR                      | ITRAQ4plex@N-term                                                                                                     |                                                    | 0.0538  | 1132.6935 | 567.3540  | 1132.6396 | 567.3271  | 2 | 48.62 |
|          | 2.01  | 3.4  | SLQTIYAVLGHSK                  | No ITRAQ4plex@N-term;<br>ITRAQ4plex(K)@13                                                                             |                                                    | 0.0771  | 1559.9564 | 520.9927  | 1559.8793 | 520.9671  | 3 | 53.10 |
| LIC10913 |       |      |                                |                                                                                                                       |                                                    |         |           |           |           |           |   |       |
|          | 1.53  | 3.5  | DVMNLEPLKEK                    | ITRAQ4plex@N-term;<br>ITRAQ4plex(K)@9;<br>ITRAQ4plex(K)@11                                                            |                                                    | -0.0302 | 1746.9613 | 583.3277  | 1746.9915 | 583.3378  | 3 | 31.81 |



|          |      |      |                                                 |                                                                                                                                               |                                                                                       |         |           |          |           |          |   |       |
|----------|------|------|-------------------------------------------------|-----------------------------------------------------------------------------------------------------------------------------------------------|---------------------------------------------------------------------------------------|---------|-----------|----------|-----------|----------|---|-------|
|          | 1.7  | 25.4 | SRIVVDQATELAER                                  | ITRAQ4plex@N-term;<br>Phospho(S)@1                                                                                                            | cleaved L-S@N-term; missed R-I@2                                                      | 0.0627  | 1809.9735 | 905.9940 | 1809.9108 | 905.9627 | 2 | 50.63 |
| LIC11009 |      |      |                                                 |                                                                                                                                               |                                                                                       |         |           |          |           |          |   |       |
|          | 2    | 4.8  | IEPALSTDFEIIAQR                                 | ITRAQ4plex@N-term;<br>Deamidated(Q)@16                                                                                                        |                                                                                       | 0.0358  | 2005.0848 | 669.3689 | 2005.0490 | 669.3569 | 3 | 39.00 |
|          | 2    | 4.8  | IFDSYEGILEFTTYDK                                | ITRAQ4plex@N-term;<br>Oxidation(D)@3;<br>ITRAQ4plex(K)@16                                                                                     | cleaved L-I@N-term                                                                    | 0.0111  | 2244.1194 | 749.0471 | 2244.1082 | 749.0433 | 3 | 38.01 |
|          | 2    | 4.8  | ISTIPK                                          | ITRAQ4plex@N-term;<br>ITRAQ4plex(K)@6                                                                                                         | cleaved Q-I@N-term                                                                    | 0.0295  | 945.6397  | 473.8271 | 945.6103  | 473.8124 | 2 | 52.94 |
|          | 2    | 4.8  | SPAGGVYDLKK                                     | ITRAQ4plex@N-term;<br>ITRAQ4plex(K)@11;<br>ITRAQ4plex(K)@12                                                                                   | missed K-K@11                                                                         | -0.0025 | 1666.9596 | 556.6605 | 1666.9619 | 556.6613 | 3 | 30.53 |
| LIC11013 |      |      |                                                 |                                                                                                                                               |                                                                                       |         |           |          |           |          |   |       |
|          | 2.24 | 1.6  | AFAPLVDR                                        | Carbaryl@N-term                                                                                                                               |                                                                                       | 0.0062  | 970.5047  | 486.2596 | 970.4985  | 486.2565 | 2 | 43.57 |
|          | 4    | 4.6  | EASSLWVLDDEERS<br>KLNSILK                       | No ITRAQ4plex@N-term;<br>ITRAQ4plex(K)@15;<br>Oxidation(D)@18;<br>ITRAQ4plex(K)@22                                                            | missed R-S@12; missed K-L@15                                                          | -0.0988 | 2909.4026 | 728.3579 | 2909.5014 | 728.3826 | 4 | 34.61 |
|          | 4    | 4.6  | FEKPVVNER                                       | ITRAQ4plex@N-term;<br>ITRAQ4plex(K)@3                                                                                                         |                                                                                       | 0.0003  | 1517.8812 | 506.9677 | 1517.8809 | 506.9676 | 3 | 30.38 |
|          | 4    | 4.6  | GNPDSIPLALR                                     | ITRAQ4plex@N-term;<br>Deamidated(N)@2                                                                                                         |                                                                                       | -0.0537 | 1296.6624 | 649.3384 | 1296.7159 | 649.3653 | 2 | 29.04 |
|          | 4    | 4.6  | ILTAEVYVLLWNTSA<br>TR                           | ITRAQ4plex@N-term                                                                                                                             |                                                                                       | -0.0157 | 2190.2014 | 731.0744 | 2190.2170 | 731.0796 | 3 | 40.14 |
|          | 4    | 4.6  | KGNPDSIPLALR                                    | ITRAQ4plex@N-term;<br>ITRAQ4plex(K)@1;<br>Deamidated(N)@3                                                                                     | cleaved W-K@N-term; missed K-G@1                                                      | -0.0454 | 1568.8676 | 523.9631 | 1568.9130 | 523.9783 | 3 | 37.77 |
|          | 2.24 | 1.6  | LSGFK                                           | ITRAQ4plex@N-term;<br>ITRAQ4plex(K)@5                                                                                                         | cleaved N-L@N-term                                                                    | 0.0008  | 838.5164  | 420.2655 | 838.5156  | 420.2651 | 2 | 38.83 |
|          | 4    | 4.6  | NFDKENFDFPIVSGPY<br>SMLSAK                      | ITRAQ4plex@N-term;<br>ITRAQ4plex(K)@4;<br>Deamidated(N)@6;<br>ITRAQ4plex(K)@22                                                                |                                                                                       | -0.0039 | 2938.4749 | 980.4989 | 2938.4788 | 980.5002 | 3 | 40.24 |
|          | 2.24 | 1.6  | NLSGFK                                          | No ITRAQ4plex@N-term;<br>ITRAQ4plex(K)@6                                                                                                      | cleaved P-N@N-term                                                                    | 0.0536  | 808.5101  | 405.2623 | 808.4565  | 405.2355 | 2 | 39.39 |
|          | 4    | 4.6  | RRGDYWMRAYPFYK<br>GTDNFDITLTKVYNEE<br>PIAQAFAFK | ITRAQ4plex@N-term;<br>Oxidation(R)@2;<br>ITRAQ4plex(Y)@10;<br>ITRAQ4plex(K)@14;<br>ITRAQ4plex(K)@25;<br>ITRAQ4plex(K)@38;<br>ITRAQ4plex(K)@39 | missed R-R@1; missed R-G@2; missed R-A@8; missed K-G@14; missed K-V@25; missed K-K@38 | -0.1754 | 5704.8271 | 951.8118 | 5705.0024 | 951.8410 | 6 | 58.63 |
|          | 4    | 4.6  | YADEKGQPNLSGFK                                  | ITRAQ4plex@N-term;<br>ITRAQ4plex(K)@5;<br>Oxidation(P)@8;<br>Deamidated(N)@9;<br>ITRAQ4plex(K)@14                                             | missed K-G@5                                                                          | -0.0081 | 2002.0292 | 668.3503 | 2002.0373 | 668.3530 | 3 | 38.44 |
|          | 4    | 4.6  | YLTPIQER                                        | ITRAQ4plex@N-term;<br>ITRAQ4plex(Y)@1;<br>Deamidated(Q)@6                                                                                     |                                                                                       | -0.0395 | 1307.6935 | 436.9051 | 1307.7329 | 436.9182 | 3 | 28.41 |
| LIC11024 |      |      |                                                 |                                                                                                                                               |                                                                                       |         |           |          |           |          |   |       |
|          | 2    | 3.3  | QTGLEYSEREER                                    | Gln->pyro-Glu@N-term                                                                                                                          | missed R-E@8                                                                          | 0.0069  | 1391.6385 | 696.8265 | 1391.6317 | 696.8231 | 2 | 27.47 |
| LIC11025 |      |      |                                                 |                                                                                                                                               |                                                                                       |         |           |          |           |          |   |       |
|          | 4.04 | 23.9 | FIIDLK                                          | ITRAQ4plex@N-term;<br>ITRAQ4plex(K)@6                                                                                                         |                                                                                       | 0.0229  | 1035.6802 | 518.8474 | 1035.6572 | 518.8359 | 2 | 39.35 |
|          | 4.04 | 23.9 | IEEYISK                                         | ITRAQ4plex@N-term;<br>ITRAQ4plex(K)@7                                                                                                         |                                                                                       | 0.0102  | 1168.6686 | 585.3416 | 1168.6583 | 585.3364 | 2 | 30.10 |
|          | 2    | 8.0  | IIDLK                                           | ITRAQ4plex@N-term;<br>ITRAQ4plex(K)@5                                                                                                         | cleaved F-I@N-term                                                                    | -0.0006 | 888.5882  | 445.3014 | 888.5888  | 445.3017 | 2 | 38.84 |
|          | 4.04 | 23.9 | LASIFEIYK                                       | ITRAQ4plex@N-term;<br>ITRAQ4plex(K)@9                                                                                                         |                                                                                       | -0.0005 | 1370.8048 | 686.4097 | 1370.8053 | 686.4099 | 2 | 36.26 |
|          | 4.04 | 23.9 | MVFTLNLSDIENLMEI<br>TK                          | ITRAQ4plex@N-term;<br>ITRAQ4plex(K)@18                                                                                                        |                                                                                       | 0.0089  | 2399.2407 | 800.7542 | 2399.2320 | 800.7513 | 3 | 39.48 |
| LIC11059 |      |      |                                                 |                                                                                                                                               |                                                                                       |         |           |          |           |          |   |       |
|          | 2    | 12.2 | EKETQPDYTGK                                     | ITRAQ4plex@N-term;<br>ITRAQ4plex(K)@2;<br>ITRAQ4plex(K)@11                                                                                    |                                                                                       | -0.0220 | 1726.8883 | 576.6367 | 1726.9103 | 576.6440 | 3 | 27.16 |
| LIC11065 |      |      |                                                 |                                                                                                                                               |                                                                                       |         |           |          |           |          |   |       |
|          | 2.07 | 2.9  | EAFDK                                           | ITRAQ4plex@N-term;<br>ITRAQ4plex(K)@5                                                                                                         |                                                                                       | 0.0429  | 896.5276  | 449.2711 | 896.4847  | 449.2496 | 2 | 29.90 |
|          | 2.07 | 2.9  | ENMHLVPAIK                                      | ITRAQ4plex@N-term;<br>ITRAQ4plex(K)@10                                                                                                        |                                                                                       | 0.0269  | 1438.8479 | 480.6233 | 1438.8210 | 480.6143 | 3 | 44.37 |
|          | 2.07 | 2.9  | FLSNLFK                                         | ITRAQ4plex@N-term;<br>Deamidated(N)@4;<br>ITRAQ4plex(K)@7                                                                                     |                                                                                       | 0.0065  | 1156.6802 | 579.3474 | 1156.6736 | 579.3441 | 2 | 42.38 |



|          |       |      |                              |                                                                                    |                                        |         |           |          |           |          |   |       |
|----------|-------|------|------------------------------|------------------------------------------------------------------------------------|----------------------------------------|---------|-----------|----------|-----------|----------|---|-------|
|          | 4.05  | 8.7  | ETFSDFQSK                    | ITRAQ4plex@N-term;<br>ITRAQ4plex(K)@10                                             | cleaved F-E@N-term                     | -0.0210 | 1489.7083 | 745.8614 | 1489.7293 | 745.8719 | 2 | 28.96 |
|          | 4.05  | 8.7  | FDPSPGNK                     | ITRAQ4plex@N-term;<br>ITRAQ4plex(K)@8                                              | cleaved L-F@N-term                     | 0.0100  | 1165.6072 | 583.8109 | 1165.5971 | 583.8058 | 2 | 25.75 |
|          | 4.05  | 8.7  | LFDPSPGNK                    | ITRAQ4plex@N-term;<br>ITRAQ4plex(K)@9                                              |                                        | 0.0054  | 1278.6866 | 640.3506 | 1278.6812 | 640.3479 | 2 | 29.18 |
|          | 4.05  | 8.7  | SLFLFETFSDFQSK               | ITRAQ4plex@N-term;<br>ITRAQ4plex(K)@15                                             | cleaved M-S@N-term                     | 0.0226  | 2097.0889 | 700.0369 | 2097.0662 | 700.0294 | 3 | 6.06  |
| LIC11194 |       |      |                              |                                                                                    |                                        |         |           |          |           |          |   |       |
|          | 23.39 | 39.5 | AAQVEEMITYIQK                | ITRAQ4plex@N-term;<br>ITRAQ4plex(K)@13                                             |                                        | -0.0040 | 1810.9702 | 906.4924 | 1810.9743 | 906.4944 | 2 | 59.04 |
|          | 23.39 | 39.5 | AHDDFGFLR                    | ITRAQ4plex@N-term                                                                  |                                        | 0.0463  | 1220.6523 | 611.3334 | 1220.6060 | 611.3103 | 2 | 47.54 |
|          | 23.39 | 39.5 | AKLTGISIPEEANK               | No ITRAQ4plex@N-term;<br>ITRAQ4plex(K)@2;<br>Deamidated(N)@13;<br>ITRAQ4plex(K)@14 | missed K-L@2                           | 0.0038  | 1759.0010 | 587.3409 | 1758.9971 | 587.3396 | 3 | 38.82 |
|          | 23.39 | 39.5 | ALANG                        | No ITRAQ4plex@N-term                                                               | cleaved A-A@N-term; cleaved G-V@C-term | 0.0235  | 444.2567  | 445.2640 | 444.2332  | 445.2405 | 1 | 31.56 |
|          | 23.39 | 39.5 | ANLVAAALANGVIPAH<br>NVTLDLK  | ITRAQ4plex@N-term;<br>Deamidated(N)@10;<br>ITRAQ4plex(K)@23                        |                                        | -0.0088 | 2573.4697 | 858.8305 | 2573.4785 | 858.8334 | 3 | 35.51 |
|          | 23.39 | 39.5 | EALFEGEKPFPIIPACE<br>HFAGSEK | ITRAQ4plex@N-term;<br>ITRAQ4plex(K)@8;<br>Methylthio(C)@16;<br>ITRAQ4plex(K)@24    |                                        | -0.0010 | 3123.5767 | 781.9014 | 3123.5775 | 781.9016 | 4 | 48.96 |
|          | 23.39 | 39.5 | EIPIHVLIETNGALQEV<br>EK      | ITRAQ4plex@N-term;<br>Deamidated(N)@11;<br>ITRAQ4plex(K)@19                        |                                        | 0.0023  | 2420.3430 | 807.7883 | 2420.3406 | 807.7875 | 3 | 34.47 |
|          | 23.39 | 39.5 | FWEILQK                      | ITRAQ4plex@N-term;<br>ITRAQ4plex(K)@7                                              | cleaved Y-F@N-term                     | -0.0077 | 1250.7190 | 626.3668 | 1250.7267 | 626.3706 | 2 | 35.11 |
|          | 23.39 | 39.5 | GQFEHELLR                    | ITRAQ4plex@N-term                                                                  | cleaved P-G@N-term                     | 0.0053  | 1271.6797 | 424.9005 | 1271.6744 | 424.8987 | 3 | 30.62 |
|          | 23.39 | 39.5 | IAYITIPKPTR                  | ITRAQ4plex@N-term;<br>ITRAQ4plex(K)@8                                              |                                        | -0.0117 | 1559.9525 | 520.9915 | 1559.9643 | 520.9954 | 3 | 31.97 |
|          | 23.39 | 39.5 | LEQIRIK                      | ITRAQ4plex@N-term;<br>ITRAQ4plex(K)@7                                              | missed R-I@5                           | 0.1733  | 1186.9375 | 594.4760 | 1186.7641 | 594.3893 | 2 | 52.26 |
|          | 23.39 | 39.5 | LQNSLNK                      | ITRAQ4plex@N-term;<br>ITRAQ4plex(K)@8                                              |                                        | -0.0024 | 1232.6945 | 617.3545 | 1232.6968 | 617.3557 | 2 | 26.75 |
|          | 23.39 | 39.5 | LTGISIPEEANK                 | ITRAQ4plex@N-term;<br>ITRAQ4plex(K)@12                                             |                                        | 0.0175  | 1558.8986 | 780.4565 | 1558.8810 | 780.4478 | 2 | 30.57 |
|          | 23.39 | 39.5 | LTGISIPEEANKR                | ITRAQ4plex@N-term;<br>ITRAQ4plex(K)@12                                             | missed K-R@12                          | -0.0079 | 1714.9742 | 572.6653 | 1714.9821 | 572.6680 | 3 | 30.95 |
|          | 23.39 | 39.5 | NQYQTYK                      | ITRAQ4plex@N-term;<br>ITRAQ4plex(K)@7                                              |                                        | -0.0163 | 1231.6278 | 616.8212 | 1231.6441 | 616.8293 | 2 | 26.54 |
|          | 23.39 | 39.5 | QAQNAEWGPIQY                 | ITRAQ4plex@N-term;<br>Deamidated(Q)@11                                             | cleaved I-Q@N-term; cleaved Y-A@C-term | 0.0619  | 1548.7950 | 517.2723 | 1548.7331 | 517.2516 | 3 | 27.45 |
|          | 23.39 | 39.5 | QDVDIIVPGAGEK                | ITRAQ4plex@N-term;<br>ITRAQ4plex(K)@13                                             |                                        | -0.0098 | 1627.8927 | 814.9536 | 1627.9025 | 814.9585 | 2 | 29.84 |
|          | 23.39 | 39.5 | SPGQFEHELLR                  | ITRAQ4plex@N-term                                                                  |                                        | 0.0053  | 1455.7645 | 486.2621 | 1455.7592 | 486.2603 | 3 | 59.68 |
|          | 23.39 | 39.5 | YFWEILQK                     | ITRAQ4plex@N-term;<br>ITRAQ4plex(K)@8                                              |                                        | -0.0354 | 1413.7546 | 707.8846 | 1413.7900 | 707.9023 | 2 | 41.77 |
|          | 18.95 | 26.0 | ALELQNK                      | ITRAQ4plex@N-term;<br>ITRAQ4plex(K)@7                                              |                                        | 0.0060  | 1102.6650 | 552.3398 | 1102.6590 | 552.3368 | 2 | 37.00 |
|          | 18.95 | 26.0 | IAYITIPK                     | ITRAQ4plex@N-term;<br>ITRAQ4plex(K)@8                                              | cleaved K-P@C-term                     | 0.0008  | 1205.7635 | 603.8890 | 1205.7627 | 603.8886 | 2 | 43.77 |
|          | 18.95 | 26.0 | RAHDDFGFLR                   | Carbamyl@N-term                                                                    | missed R-A@1                           | -0.0101 | 1275.6008 | 638.8077 | 1275.6109 | 638.8127 | 2 | 48.59 |
| LIC11196 |       |      |                              |                                                                                    |                                        |         |           |          |           |          |   |       |
|          | 4.21  | 15.5 | AGEGWNK                      | ITRAQ4plex@N-term;<br>ITRAQ4plex(K)@7                                              |                                        | 0.0091  | 1048.5636 | 525.2891 | 1048.5545 | 525.2845 | 2 | 29.74 |
|          | 4.21  | 15.5 | FELSELDQSPGIK                | ITRAQ4plex@N-term;<br>ITRAQ4plex(K)@14                                             |                                        | 0.0118  | 1897.0195 | 633.3471 | 1897.0077 | 633.3432 | 3 | 36.31 |
|          | 4.21  | 15.5 | KDIDDNK                      | ITRAQ4plex@N-term;<br>ITRAQ4plex(K)@1;<br>ITRAQ4plex(K)@7                          | cleaved L-K@N-term                     | -0.0279 | 1278.6866 | 640.3506 | 1278.7145 | 640.3645 | 2 | 29.18 |
|          | 4.21  | 15.5 | SVRESGAENSALFFG<br>PK        | No ITRAQ4plex@N-term;<br>Deamidated(R)@3;<br>Deamidated(N)@9;<br>ITRAQ4plex(K)@17  | missed R-E@3                           | 0.0335  | 1940.9938 | 648.0052 | 1940.9602 | 647.9940 | 3 | 35.38 |
|          | 4.21  | 15.5 | VIFEPCLK                     | ITRAQ4plex@N-term;<br>Methylthio(C)@6;<br>ITRAQ4plex(K)@8                          |                                        | 0.0409  | 1281.7478 | 641.8812 | 1281.7069 | 641.8607 | 2 | 40.29 |
|          | 4.21  | 15.5 | YIIRPSVAVK                   | ITRAQ4plex@N-term;<br>ITRAQ4plex(K)@10                                             |                                        | 0.0105  | 1432.9115 | 478.6444 | 1432.9010 | 478.6409 | 3 | 31.05 |
|          | 2.68  | 9.0  | DAELKPHFAR                   | Carbamyl@N-term;<br>ITRAQ4plex(K)@5                                                |                                        | 0.0282  | 1369.7506 | 457.5908 | 1369.7224 | 457.5814 | 3 | 41.19 |
| LIC11209 |       |      |                              |                                                                                    |                                        |         |           |          |           |          |   |       |
|          | 9.7   | 40.3 | AEIENEIGK                    | ITRAQ4plex@N-term;<br>ITRAQ4plex(K)@9                                              |                                        | -0.0163 | 1289.6908 | 645.8527 | 1289.7071 | 645.8608 | 2 | 28.44 |

|          |       |      |                              |                                                                                                                                             |                                                                  |         |           |           |           |           |   |       |
|----------|-------|------|------------------------------|---------------------------------------------------------------------------------------------------------------------------------------------|------------------------------------------------------------------|---------|-----------|-----------|-----------|-----------|---|-------|
|          | 9.7   | 40.3 | FLQPAFVNQPLHLR               | ITRAQ4plex@N-term                                                                                                                           |                                                                  | 0.0046  | 1823.0374 | 608.6864  | 1823.0328 | 608.6849  | 3 | 33.74 |
|          | 9.7   | 40.3 | FQQQPDVHHPGIISTIL<br>DEIMVK  | ITRAQ4plex@N-term;<br>ITRAQ4plex(K)@23                                                                                                      |                                                                  | 0.0178  | 2837.5784 | 710.4019  | 2837.5605 | 710.3974  | 4 | 41.87 |
|          | 9.7   | 40.3 | GWVFK                        | ITRAQ4plex@N-term;<br>ITRAQ4plex(K)@5                                                                                                       |                                                                  | 0.0098  | 923.5571  | 462.7858  | 923.5473  | 462.7809  | 2 | 39.11 |
|          | 9.7   | 40.3 | INEAMNFK                     | ITRAQ4plex@N-term;<br>ITRAQ4plex(K)@8                                                                                                       |                                                                  | -0.0031 | 1253.6650 | 627.8398  | 1253.6682 | 627.8414  | 2 | 30.31 |
|          | 9.7   | 40.3 | MKASVRANLSFGSSP<br>DNPDLQLK  | ITRAQ4plex@N-term;<br>Oxidation(M)@1;<br>ITRAQ4plex(K)@2;<br>ITRAQ4plex(S)@14;<br>ITRAQ4plex(K)@24                                          | missed K-A@2; missed R-A@6                                       | -0.1049 | 3123.5786 | 781.9019  | 3123.6834 | 781.9281  | 4 | 49.11 |
| LIC11216 | 9.7   | 40.3 | QPAFVNQPLHLR                 | Gln->pyro-Glu@N-term                                                                                                                        | cleaved L-Q@N-term                                               | 0.0102  | 1401.7620 | 701.8882  | 1401.7517 | 701.8831  | 2 | 34.40 |
|          | 2     | 2.3  | ADNRLYPRIDPVTKI<br>EELIQLQLK | ITRAQ4plex@N-term;<br>Oxidation(D)@2;<br>Deamidated(R)@4;<br>Oxidation(P)@11;<br>ITRAQ4plex(K)@15;<br>Deamidated(Q)@23;<br>ITRAQ4plex(K)@25 | cleaved F-A@N-term; missed R-L@4;<br>missed R-I@8; missed K-I@15 | 0.0581  | 3445.9614 | 575.3342  | 3445.9034 | 575.3245  | 6 | 53.41 |
|          | 2     | 2.3  | ESSNQIVATMALQQE<br>KKDKIR    | ITRAQ4plex@N-term;<br>Deamidated(Q)@13;<br>ITRAQ4plex(K)@16;<br>ITRAQ4plex(K)@17;<br>Oxidation(D)@18;<br>ITRAQ4plex(K)@19                   | missed K-K@16; missed K-I@19                                     | -0.0017 | 3009.6599 | 502.6172  | 3009.6616 | 502.6175  | 6 | 59.41 |
|          | 2     | 2.3  | GFAVVASEITR                  | ITRAQ4plex@N-term;<br>ITRAQ4plex(T)@10                                                                                                      |                                                                  | -0.0176 | 1436.8055 | 719.4100  | 1436.8231 | 719.4188  | 2 | 58.03 |
|          | 2     | 2.3  | GFAVVASEITRL                 | ITRAQ4plex@N-term;<br>Deamidated(R)@11                                                                                                      | cleaved L-A@C-term; missed R-L@11                                | 0.0177  | 1406.8069 | 704.4107  | 1406.7891 | 704.4018  | 2 | 39.88 |
|          | 2     | 2.3  | IDPVTDK                      | ITRAQ4plex@N-term;<br>ITRAQ4plex(K)@7                                                                                                       |                                                                  | 0.0331  | 1074.6495 | 538.3320  | 1074.6165 | 538.3155  | 2 | 43.09 |
|          | 2     | 2.3  | KIVENSVRVY                   | ITRAQ4plex@N-term;<br>ITRAQ4plex(K)@11;<br>Oxidation(R)@8                                                                                   | cleaved Y-A@C-term; missed K-I@1;<br>missed R-V@8                | -0.0350 | 1509.8408 | 504.2876  | 1509.8759 | 504.2992  | 3 | 42.70 |
|          | 2     | 2.3  | NADFSHPVEEEDSN<br>K          | ITRAQ4plex@N-term;<br>Deamidated(N)@15;<br>ITRAQ4plex(K)@16                                                                                 |                                                                  | 0.0141  | 2104.9932 | 1053.5040 | 2104.9793 | 1053.4969 | 2 | 24.43 |
|          | 2     | 2.3  | VNLLALNAIEAAR                | ITRAQ4plex@N-term;<br>Deamidated(N)@2                                                                                                       |                                                                  | -0.0501 | 1582.8665 | 792.4405  | 1582.9164 | 792.4655  | 2 | 45.28 |
|          | 2     | 2.3  | VREMLNTILNF                  | ITRAQ4plex@N-term;<br>Deamidated(R)@2;<br>Oxidation(M)@4                                                                                    | cleaved F-S@C-term; missed R-E@2                                 | -0.0487 | 1509.7496 | 755.8821  | 1509.7983 | 755.9064  | 2 | 27.86 |
|          | 2     | 2.3  | VYAEILSGLEHLK                | ITRAQ4plex@N-term;<br>ITRAQ4plex(K)@13                                                                                                      |                                                                  | -0.0186 | 1758.9939 | 587.3386  | 1759.0124 | 587.3447  | 3 | 38.92 |
| LIC11219 | 10.57 | 29.0 | AFQFVEK                      | ITRAQ4plex@N-term;<br>ITRAQ4plex(K)@7                                                                                                       |                                                                  | -0.0089 | 1155.6443 | 578.8294  | 1155.6532 | 578.8339  | 2 | 31.14 |
|          | 10.57 | 29.0 | ATINDLPVGR                   | ITRAQ4plex@N-term                                                                                                                           | cleaved Q-A@N-term                                               | -0.0136 | 1198.6655 | 600.3400  | 1198.6792 | 600.3469  | 2 | 29.11 |
|          | 10.57 | 29.0 | DYNVLTGGVAL                  | ITRAQ4plex@N-term;<br>Oxidation(D)@1                                                                                                        | cleaved L-R@C-term                                               | 0.1006  | 1409.8165 | 470.9461  | 1409.7160 | 470.9126  | 3 | 31.17 |
|          | 10.57 | 29.0 | DYNNLTGGVALR                 | ITRAQ4plex@N-term                                                                                                                           |                                                                  | 0.0061  | 1549.8282 | 775.9214  | 1549.8222 | 775.9184  | 2 | 42.35 |
|          | 10.57 | 29.0 | EGGIGEIK                     | Glu->pyro-Glu@N-term;<br>ITRAQ4plex(K)@8                                                                                                    |                                                                  | 0.0326  | 927.5474  | 464.7810  | 927.5147  | 464.7646  | 2 | 39.69 |
|          | 9     | 21.8 | EGGIGEIKYPLIADLTK            | ITRAQ4plex@N-term;<br>ITRAQ4plex(K)@8;<br>ITRAQ4plex(K)@17                                                                                  | missed K-Y@8                                                     | -0.0178 | 2248.2866 | 750.4362  | 2248.3044 | 750.4421  | 3 | 53.08 |
|          | 10.57 | 29.0 | GTFIIDPAGVI                  | ITRAQ4plex@N-term;<br>Oxidation(D)@6                                                                                                        | cleaved I-R@C-term                                               | -0.0189 | 1261.6851 | 631.8498  | 1261.7040 | 631.8593  | 2 | 36.03 |
|          | 10.57 | 29.0 | GTFIIDPAGVIR                 | ITRAQ4plex@N-term                                                                                                                           |                                                                  | 0.0151  | 1401.8253 | 701.9199  | 1401.8102 | 701.9124  | 2 | 34.01 |
|          | 9     | 21.8 | LSDYK                        | ITRAQ4plex@N-term;<br>ITRAQ4plex(K)@5                                                                                                       |                                                                  | 0.0000  | 912.5161  | 457.2653  | 912.5160  | 457.2653  | 2 | 36.78 |
|          | 10.57 | 29.0 | PQVTSAPDFK                   | ITRAQ4plex@N-term;<br>ITRAQ4plex(K)@11                                                                                                      | cleaved M-P@N-term                                               | 0.0027  | 1489.8411 | 745.9278  | 1489.8384 | 745.9265  | 2 | 39.17 |
|          | 10.57 | 29.0 | QATINDLPVGR                  | ITRAQ4plex@N-term                                                                                                                           |                                                                  | -0.0437 | 1326.6940 | 664.3542  | 1326.7377 | 664.3762  | 2 | 28.79 |
|          | 10.57 | 29.0 | QVTSAPDFK                    | ITRAQ4plex@N-term;<br>Deamidated(Q)@1;<br>Dehydrated(T)@3;<br>Dehydrated(S)@4;<br>ITRAQ4plex(K)@10                                          | cleaved P-Q@N-term                                               | -0.0044 | 1357.7441 | 679.8793  | 1357.7485 | 679.8815  | 2 | 30.70 |
|          | 10.57 | 29.0 | SISRDNVLTGGVAL<br>R          | ITRAQ4plex@N-term;<br>Deamidated(N)@7;<br>Oxidation(R)@17                                                                                   | missed R-D@4                                                     | -0.0554 | 2009.9951 | 1006.0050 | 2010.0504 | 1006.0325 | 2 | 50.31 |
|          | 9     | 21.8 | VALR                         | ITRAQ4plex@N-term                                                                                                                           | cleaved G-V@N-term                                               | -0.0190 | 601.3843  | 602.3915  | 601.4033  | 602.4106  | 1 | 52.53 |
|          | 10.57 | 29.0 | YPLIADLTK                    | ITRAQ4plex@N-term;<br>ITRAQ4plex(K)@9                                                                                                       |                                                                  | 0.0021  | 1320.7919 | 661.4032  | 1320.7897 | 661.4021  | 2 | 33.13 |





|          |      |                                        |                                                                                  |                                                                  |         |           |          |           |          |   |       |
|----------|------|----------------------------------------|----------------------------------------------------------------------------------|------------------------------------------------------------------|---------|-----------|----------|-----------|----------|---|-------|
| 32.93    | 50.3 | AAPSFDELTSK                            | ITRAQ4plex@N-term;<br>ITRAQ4plex(K)@11                                           |                                                                  | -0.0328 | 1452.7377 | 727.3761 | 1452.7704 | 727.3925 | 2 | 30.20 |
| 32.93    | 50.3 | AIALSSTDGLIR                           | ITRAQ4plex@N-term                                                                |                                                                  | -0.0033 | 1359.7811 | 680.8978 | 1359.7844 | 680.8995 | 2 | 31.28 |
| 32.93    | 50.3 | ATLGR                                  | ITRAQ4plex@N-term                                                                | cleaved D-A@N-term                                               | 0.0543  | 660.4584  | 661.4656 | 660.4041  | 661.4113 | 1 | 55.38 |
| 32.93    | 50.3 | AVRAIALSSTDGLIR                        | ITRAQ4plex@N-term;<br>Oxidation(D)@11                                            | missed R-A@3                                                     | 0.0432  | 1702.0292 | 568.3503 | 1701.9859 | 568.3359 | 3 | 37.72 |
| 32.93    | 50.3 | DLQDIILGMDELSED<br>DK                  | ITRAQ4plex@N-term;<br>ITRAQ4plex(K)@19                                           |                                                                  | -0.0117 | 2420.2119 | 807.7446 | 2420.2236 | 807.7485 | 3 | 40.06 |
| 32.93    | 50.3 | DLQDIILGMDELSED<br>DKVLVARAR           | ITRAQ4plex@N-term;<br>Oxidation(D)@4;<br>ITRAQ4plex(K)@19                        | missed K-V@19; missed R-A@24                                     | 0.1197  | 3201.8357 | 534.6465 | 3201.7159 | 534.6266 | 6 | 59.67 |
| 32.93    | 50.3 | DSIGTDVLLFVDNIFR                       | ITRAQ4plex@N-term                                                                |                                                                  | -0.0382 | 1967.0104 | 984.5125 | 1967.0486 | 984.5316 | 2 | 44.09 |
| 32.93    | 50.3 | ETIIAEVQTHIGGK                         | ITRAQ4plex@N-term;<br>ITRAQ4plex(K)@14                                           |                                                                  | -0.0430 | 1782.9653 | 595.3290 | 1783.0083 | 595.3434 | 3 | 33.37 |
| 32.93    | 50.3 | EVISGNYDHLPEQAFY<br>MVGSIIDDAIEK       | ITRAQ4plex@N-term;<br>ITRAQ4plex(K)@27                                           |                                                                  | 2.0123  | 3329.6335 | 833.4156 | 3327.6213 | 832.9126 | 4 | 39.09 |
| 32.93    | 50.3 | FLSQPFHVAEVFTGA<br>PGK                 | ITRAQ4plex@N-term;<br>ITRAQ4plex(K)@18                                           |                                                                  | 0.0081  | 2219.2063 | 740.7427 | 2219.1983 | 740.7400 | 3 | 35.73 |
| 32.93    | 50.3 | FSQAGSEVSALLGR                         | ITRAQ4plex@N-term                                                                |                                                                  | -0.0365 | 1564.7966 | 783.4056 | 1564.8331 | 783.4238 | 2 | 33.53 |
| 32.93    | 50.3 | GQEVNNTGKPISPVP<br>GDATLGR             | ITRAQ4plex@N-term;<br>ITRAQ4plex(K)@9                                            |                                                                  | -0.0210 | 2469.3220 | 824.1146 | 2469.3431 | 824.1216 | 3 | 30.59 |
| 32.93    | 50.3 | IDLLAPYIK                              | ITRAQ4plex@N-term;<br>ITRAQ4plex(K)@9                                            | cleaved V-I@N-term                                               | -0.0013 | 1332.8247 | 667.4196 | 1332.8261 | 667.4203 | 2 | 34.80 |
| 32.93    | 50.3 | IFNVLGK                                | ITRAQ4plex@N-term;<br>ITRAQ4plex(K)@7                                            |                                                                  | 0.0100  | 1077.6890 | 539.8517 | 1077.6790 | 539.8468 | 2 | 37.45 |
| 32.93    | 50.3 | MPSAVGYQP                              | ITRAQ4plex@N-term;<br>ITRAQ4plex(Y)@7                                            | cleaved P-T@C-term                                               | 0.0938  | 1236.7355 | 619.3750 | 1236.6416 | 619.3281 | 2 | 35.57 |
| 32.93    | 50.3 | MPSAVGYQPTLSTEM<br>GALQER              | ITRAQ4plex@N-term;<br>Oxidation(M)@1                                             |                                                                  | -0.0070 | 2425.1670 | 809.3962 | 2425.1739 | 809.3986 | 3 | 34.30 |
| 32.93    | 50.3 | NVFGK                                  | ITRAQ4plex@N-term;<br>ITRAQ4plex(K)@5                                            | cleaved T-N@N-term                                               | -0.0042 | 851.5067  | 426.7606 | 851.5109  | 426.7627 | 2 | 27.74 |
| 32.93    | 50.3 | PISVPVGDATLGR                          | No ITRAQ4plex@N-term                                                             | cleaved K-P@N-term                                               | 0.0129  | 1280.7218 | 641.3682 | 1280.7089 | 641.3617 | 2 | 40.90 |
| 32.93    | 50.3 | SQAGSEVSALLGR                          | ITRAQ4plex@N-term                                                                | cleaved F-S@N-term                                               | 0.0071  | 1417.7719 | 709.8932 | 1417.7647 | 709.8896 | 2 | 31.17 |
| 32.93    | 50.3 | TIDEGPAITVK                            | Carbamyl@N-term;<br>ITRAQ4plex(K)@11                                             |                                                                  | 0.0501  | 1329.7764 | 665.8954 | 1329.7262 | 665.8704 | 2 | 28.91 |
| 32.93    | 50.3 | TRENDLWREMKEKES<br>GVIDKTVLCYGMNE<br>P | ITRAQ4plex@N-term;<br>ITRAQ4plex(K)@12;<br>ITRAQ4plex(K)@19;<br>Methylthio(C)@23 | cleaved P-P@C-term; missed R-E@2;<br>missed R-E@9; missed K-T@19 | -0.0013 | 3975.9304 | 994.9899 | 3975.9317 | 994.9902 | 4 | 41.84 |
| 32.93    | 50.3 | TVLIQELINNIK                           | ITRAQ4plex@N-term;<br>ITRAQ4plex(K)@13                                           |                                                                  | -0.0052 | 1756.0651 | 586.3623 | 1756.0702 | 586.3640 | 3 | 38.41 |
| 32.93    | 50.3 | VALSALMAEHFR                           | ITRAQ4plex@N-term                                                                |                                                                  | 0.0045  | 1588.8563 | 530.6260 | 1588.8517 | 530.6245 | 3 | 35.23 |
| 32.93    | 50.3 | VIDLLAPYIK                             | ITRAQ4plex@N-term;<br>ITRAQ4plex(K)@10                                           |                                                                  | 0.0002  | 1431.8947 | 716.9546 | 1431.8945 | 716.9545 | 2 | 36.73 |
| 32.93    | 50.3 | VMNAQVLGEEHYLVA<br>R                   | ITRAQ4plex@N-term                                                                |                                                                  | -0.0036 | 1972.0287 | 658.3502 | 1972.0322 | 658.3513 | 3 | 32.57 |
| 32.93    | 50.3 | VMNAQVLGEEHYLVA<br>REVQR               | ITRAQ4plex@N-term;<br>Deamidated(N)@3;<br>Oxidation(H)@11                        | missed R-E@16                                                    | 0.0036  | 2501.2854 | 834.7691 | 2501.2818 | 834.7679 | 3 | 59.78 |
| 23.14    | 31.3 | PPGARLRVALSALTM<br>AEHFR               | ITRAQ4plex@N-term                                                                | cleaved E-P@N-term; missed R-L@5;<br>missed R-V@7                | 3.4153  | 2339.7175 | 780.9131 | 2336.3021 | 779.7747 | 3 | 51.50 |
| 23.14    | 31.3 | PYIK                                   | ITRAQ4plex@N-term;<br>ITRAQ4plex(K)@4                                            | cleaved A-P@N-term                                               | 0.0470  | 807.5569  | 404.7857 | 807.5098  | 404.7622 | 2 | 41.44 |
| 23.14    | 31.3 | TGLFGGAGVGK                            | ITRAQ4plex@N-term;<br>ITRAQ4plex(K)@11                                           |                                                                  | -0.0134 | 1250.7092 | 626.3619 | 1250.7227 | 626.3686 | 2 | 41.39 |
| LIC11258 |      |                                        |                                                                                  |                                                                  |         |           |          |           |          |   |       |
| 11.48    | 17.4 | AENPLTCVVLGTGK                         | ITRAQ4plex@N-term;<br>Methylthio(C)@7;<br>ITRAQ4plex(K)@14                       |                                                                  | -0.0014 | 1734.9238 | 868.4692 | 1734.9252 | 868.4699 | 2 | 47.72 |
| 14.01    | 24.4 | AETMEVRGR                              | ITRAQ4plex@N-term                                                                | missed R-G@7                                                     | -0.0233 | 1191.5919 | 596.8032 | 1191.6152 | 596.8149 | 2 | 24.03 |
| 14.01    | 24.4 | ALKEPTDEILDGK                          | ITRAQ4plex@N-term;<br>ITRAQ4plex(K)@3;<br>ITRAQ4plex(K)@14                       |                                                                  | -0.0117 | 1973.1293 | 658.7170 | 1973.1410 | 658.7210 | 3 | 33.23 |
| 14.01    | 24.4 | AVRESAEQAGAR                           | ITRAQ4plex@N-term;<br>Oxidation(R)@3; Cation:K(E)@4                              | missed R-E@3                                                     | 0.0544  | 1441.7341 | 481.5853 | 1441.6798 | 481.5672 | 3 | 25.58 |
| 14.01    | 24.4 | DGVIADFETVEK                           | ITRAQ4plex@N-term;<br>ITRAQ4plex(K)@12                                           |                                                                  | 0.0274  | 1609.8717 | 805.9431 | 1609.8443 | 805.9294 | 2 | 36.58 |
| 14.01    | 24.4 | GEIVAIRPMK                             | ITRAQ4plex@N-term;<br>Deamidated(R)@7;<br>ITRAQ4plex(K)@10                       | cleaved P-G@N-term                                               | 0.0002  | 1401.8259 | 701.9202 | 1401.8257 | 701.9201 | 2 | 33.95 |
| 14.01    | 24.4 | GQGIVLSEPSVAVHA<br>ATGK                | ITRAQ4plex@N-term;<br>ITRAQ4plex(K)@20                                           |                                                                  | -0.0061 | 2207.2458 | 736.7559 | 2207.2518 | 736.7579 | 3 | 32.30 |
| 11.48    | 17.4 | GRDAISGLPR                             | Carbamyl@N-term                                                                  | missed R-D@2                                                     | -0.0056 | 1083.5730 | 542.7938 | 1083.5785 | 542.7965 | 2 | 38.38 |

|          |       |      |                                          |                                                                                                    |                                                                 |         |           |           |           |           |   |       |
|----------|-------|------|------------------------------------------|----------------------------------------------------------------------------------------------------|-----------------------------------------------------------------|---------|-----------|-----------|-----------|-----------|---|-------|
|          | 14.01 | 24.4 | GRDAISGLPRTLELES<br>NEIR                 | ITRAQ4plex@N-term;<br>Deamidated(R)@2;<br>Oxidation(D)@3;<br>Deamidated(R)@10;<br>Deamidated(N)@17 | missed R-D@2; missed R-T@10                                     | -0.0535 | 2388.1719 | 797.0646  | 2388.2254 | 797.0824  | 3 | 25.99 |
|          | 14.01 | 24.4 | IVIGVPSGITEVER                           | ITRAQ4plex@N-term                                                                                  |                                                                 | -0.0182 | 1611.9136 | 806.9641  | 1611.9318 | 806.9732  | 2 | 33.18 |
|          | 14.01 | 24.4 | KYLDELK                                  | ITRAQ4plex@N-term;<br>ITRAQ4plex(K)@1;<br>ITRAQ4plex(K)@7                                          | cleaved G-K@N-term; missed K-Y@1                                | -0.0407 | 1339.7670 | 447.5963  | 1339.8077 | 447.6098  | 3 | 30.78 |
|          | 14.01 | 24.4 | LTGGG                                    | No ITRAQ4plex@N-term                                                                               | cleaved V-L@N-term; cleaved G-C@C-term                          | 0.0052  | 403.2119  | 404.2191  | 403.2067  | 404.2140  | 1 | 46.98 |
|          | 14.01 | 24.4 | LTIGNAFPEKK                              | ITRAQ4plex@N-term;<br>ITRAQ4plex(K)@10;<br>ITRAQ4plex(K)@11                                        | missed K-K@10                                                   | -0.0048 | 1648.9830 | 550.6683  | 1648.9878 | 550.6699  | 3 | 32.51 |
|          | 14.01 | 24.4 | NQYNLVVGER                               | No ITRAQ4plex@N-term                                                                               |                                                                 | 0.0077  | 1190.6121 | 596.3133  | 1190.6044 | 596.3095  | 2 | 29.04 |
|          | 14.01 | 24.4 | RAVRESAEQAGAR                            | Methylthio@N-term; Methyl(R)@4                                                                     | missed R-A@1; missed R-E@4                                      | 0.0048  | 1459.7362 | 487.5860  | 1459.7314 | 487.5844  | 3 | 24.73 |
|          | 14.01 | 24.4 | TEVERRAVRESAEQAGAR                       | No ITRAQ4plex@N-term                                                                               | cleaved I-T@N-term; missed R-R@5;<br>missed R-A@6; missed R-E@9 | 0.0053  | 2014.0356 | 672.3525  | 2014.0304 | 672.3507  | 3 | 48.53 |
|          | 14.01 | 24.4 | TLELESNEIRK                              | ITRAQ4plex@N-term;<br>ITRAQ4plex(K)@11                                                             | missed R-K@10                                                   | -2.0605 | 1616.8529 | 539.9583  | 1618.9134 | 540.6451  | 3 | 29.91 |
|          | 14.01 | 24.4 | TPGEIVAIRPMK                             | ITRAQ4plex@N-term;<br>ITRAQ4plex(K)@12                                                             |                                                                 | -0.0100 | 1598.9323 | 533.9847  | 1598.9422 | 533.9880  | 3 | 50.35 |
|          | 14.01 | 24.4 | TPPELASDIVER                             | ITRAQ4plex@N-term                                                                                  |                                                                 | 0.0038  | 1469.7886 | 735.9016  | 1469.7848 | 735.8997  | 2 | 31.13 |
|          | 11.48 | 17.4 | TTFVKPR                                  | ITRAQ4plex@N-term;<br>ITRAQ4plex(K)@5                                                              |                                                                 | 0.0015  | 1135.6971 | 568.8558  | 1135.6957 | 568.8551  | 2 | 37.32 |
|          | 14.01 | 24.4 | VKPRI                                    | ITRAQ4plex@N-term;<br>ITRAQ4plex(K)@2                                                              | cleaved F-V@N-term; cleaved I-V@C-term;<br>missed R-I@4         | 0.0682  | 899.6842  | 450.8494  | 899.6160  | 450.8153  | 2 | 53.62 |
|          | 11.48 | 17.4 | VLAVGQEAQ                                | ITRAQ4plex@N-term;<br>ITRAQ4plex(K)@9                                                              |                                                                 | 0.0118  | 1201.7393 | 601.8769  | 1201.7274 | 601.8710  | 2 | 37.79 |
|          | 11.48 | 17.4 | YIKPGIR                                  | ITRAQ4plex@N-term;<br>ITRAQ4plex(K)@3                                                              |                                                                 | 0.0011  | 1133.7175 | 567.8660  | 1133.7164 | 567.8655  | 2 | 40.45 |
|          | 14.01 | 24.4 | YLRNQYNLVVGERTA<br>EDIK                  | ITRAQ4plex@N-term;<br>Deamidated(N)@4;<br>Deamidated(O)@5;<br>Deamidated(N)@7;<br>ITRAQ4plex(K)@19 | missed R-N@3; missed R-T@13                                     | 0.0200  | 2571.3625 | 858.1281  | 2571.3424 | 858.1214  | 3 | 43.71 |
| LIC11268 |       |      |                                          |                                                                                                    |                                                                 |         |           |           |           |           |   |       |
|          | 2     | 1.8  | FRVGIQYSIGSGDPNR                         | ITRAQ4plex@N-term;<br>Oxidation(Y)@7;<br>Oxidation(N)@15                                           | missed R-V@2                                                    | 0.0111  | 1940.9938 | 648.0052  | 1940.9826 | 648.0015  | 3 | 35.38 |
|          | 2     | 1.8  | NFADGFEIFIGR                             | ITRAQ4plex@N-term;<br>Deamidated(N)@1                                                              |                                                                 | -0.0357 | 1529.7279 | 510.9166  | 1529.7636 | 510.9285  | 3 | 26.18 |
|          | 2     | 1.8  | QIFGFGDNRYVGGRN<br>DGQTGNSFDGARVK        | Gln->pyro-Glu@N-term;<br>Oxidation(F)@5; Oxidation(N)@8;<br>ITRAQ4plex(K)@29                       | missed R-Y@9; missed R-N@14; missed R-V@27                      | -0.1275 | 3290.4299 | 1097.8170 | 3290.5575 | 1097.8598 | 3 | 23.91 |
|          | 2     | 1.8  | QRDDLNTVGFR                              | Gln->pyro-Glu@N-term                                                                               | missed R-D@2                                                    | 0.0078  | 1302.6394 | 652.3270  | 1302.6317 | 652.3231  | 2 | 29.98 |
|          | 2     | 1.8  | TDKLFWGDIFRTGFQI<br>RPR                  | No ITRAQ4plex@N-term;<br>ITRAQ4plex(K)@3;<br>Deamidated(R)@17;<br>Deamidated(R)@19                 | missed K-L@3; missed R-T@11                                     | -0.0298 | 2498.2896 | 833.7704  | 2498.3192 | 833.7803  | 3 | 58.80 |
| LIC11273 |       |      |                                          |                                                                                                    |                                                                 |         |           |           |           |           |   |       |
|          | 3.75  | 7.8  | DELAPDPAAKLNLVLR                         | ITRAQ4plex@N-term;<br>ITRAQ4plex(K)@10                                                             | missed K-L@10                                                   | 0.0030  | 2022.1747 | 675.0655  | 2022.1717 | 675.0645  | 3 | 46.71 |
|          | 3.75  | 7.8  | FRDELAPDPAAK                             | ITRAQ4plex@N-term;<br>ITRAQ4plex(K)@12                                                             | missed R-D@2                                                    | -0.0237 | 1616.8529 | 539.9583  | 1616.8766 | 539.9661  | 3 | 29.91 |
|          | 3.75  | 7.8  | LIAGKLTIELR                              | ITRAQ4plex@N-term; No<br>ITRAQ4plex(K)@5                                                           | missed K-L@5                                                    | -0.0201 | 1369.8578 | 457.6266  | 1369.8779 | 457.6332  | 3 | 33.71 |
|          | 3.75  | 7.8  | RTLSRLYGSQK                              | ITRAQ4plex@N-term;<br>ITRAQ4plex(K)@11                                                             | missed R-T@1; missed R-L@5                                      | -0.0127 | 1524.8853 | 509.3024  | 1524.8980 | 509.3066  | 3 | 38.42 |
|          | 3.75  | 7.8  | SALAQGK                                  | ITRAQ4plex@N-term;<br>ITRAQ4plex(K)@7                                                              | cleaved A-S@N-term                                              | 0.0056  | 961.5856  | 481.8001  | 961.5800  | 481.7973  | 2 | 24.72 |
|          | 3.75  | 7.8  | SKPSVIIDMAK                              | ITRAQ4plex@N-term;<br>ITRAQ4plex(K)@2;<br>ITRAQ4plex(K)@11                                         |                                                                 | -0.0118 | 1619.9528 | 540.9915  | 1619.9646 | 540.9955  | 3 | 33.07 |
|          | 3.75  | 7.8  | TASALAQGK                                | ITRAQ4plex@N-term;<br>ITRAQ4plex(K)@9                                                              | cleaved M-T@N-term                                              | 0.0293  | 1133.6942 | 567.8544  | 1133.6648 | 567.8397  | 2 | 47.01 |
| LIC11274 |       |      |                                          |                                                                                                    |                                                                 |         |           |           |           |           |   |       |
|          | 1.4   | 33.6 | GEVPGGQNNQNTGA<br>TAANNQQTGGTPEQD<br>GDR | ITRAQ4plex@N-term;<br>Deamidated(N)@8;<br>Dehydrated(T)@12;<br>Phospho(T)@22;<br>Oxidation(P)@26   |                                                                 | -0.1517 | 3419.2852 | 855.8286  | 3419.4369 | 855.8665  | 4 | 25.35 |
| LIC11294 |       |      |                                          |                                                                                                    |                                                                 |         |           |           |           |           |   |       |
|          | 6     | 5.0  | ADWAEGLGVK                               | ITRAQ4plex@N-term;<br>ITRAQ4plex(K)@10                                                             |                                                                 | -0.0099 | 1332.7183 | 667.3664  | 1332.7281 | 667.3713  | 2 | 32.07 |

|          |      |      |                              |                                                                                                                        |                                                      |         |           |          |           |          |   |       |
|----------|------|------|------------------------------|------------------------------------------------------------------------------------------------------------------------|------------------------------------------------------|---------|-----------|----------|-----------|----------|---|-------|
|          | 4.04 | 3.6  | AFIF                         | ITRAQ4plex@N-term                                                                                                      | cleaved H-A@N-term; cleaved F-Y@C-term               | 0.0104  | 640.3810  | 641.3883 | 640.3706  | 641.3779 | 1 | 58.72 |
|          | 6    | 5.0  | AHTRA                        | ITRAQ4plex@N-term                                                                                                      | cleaved G-A@N-term; cleaved A-D@C-term; missed R-A@4 | -0.0010 | 698.3936  | 699.4008 | 698.3946  | 699.4018 | 1 | 40.20 |
|          | 4.04 | 3.6  | AllADLK                      | ITRAQ4plex@N-term;<br>ITRAQ4plex(K)@7                                                                                  |                                                      | 0.0040  | 1030.6670 | 516.3408 | 1030.6630 | 516.3388 | 2 | 40.05 |
|          | 6    | 5.0  | INSFIQNVILQK                 | ITRAQ4plex@N-term;<br>Deamidated(O)@6;<br>Oxidation(N)@7;<br>Deamidated(O)@11;<br>ITRAQ4plex(K)@12                     |                                                      | 0.0070  | 1721.9877 | 575.0032 | 1721.9807 | 575.0009 | 3 | 35.45 |
|          | 4.04 | 3.6  | LAEPSDHHTK                   | Carbamylation@N-term;<br>ITRAQ4plex(K)@10                                                                              |                                                      | 0.0084  | 1320.6628 | 441.2282 | 1320.6544 | 441.2254 | 3 | 35.83 |
|          | 6    | 5.0  | TEETDAVAAEK                  | ITRAQ4plex@N-term;<br>ITRAQ4plex(K)@12                                                                                 |                                                      | -0.0052 | 1521.7715 | 761.8930 | 1521.7766 | 761.8956 | 2 | 26.06 |
|          | 6    | 5.0  | TVLFVIANVVFIR                | ITRAQ4plex@N-term;<br>Oxidation(F)@11;<br>Deamidated(R)@13                                                             | cleaved F-T@N-term                                   | -0.0533 | 1650.9298 | 826.4722 | 1650.9831 | 826.4988 | 2 | 48.49 |
|          | 6    | 5.0  | VKDIAELVADNLQ                | ITRAQ4plex@N-term;<br>ITRAQ4plex(K)@2                                                                                  |                                                      | -0.0002 | 1714.9707 | 858.4926 | 1714.9709 | 858.4927 | 2 | 36.35 |
|          | 4.04 | 3.6  | YNDNYENPR                    | ITRAQ4plex@N-term;<br>Carboxy(D)@3                                                                                     |                                                      | 0.0113  | 1371.5927 | 686.8036 | 1371.5813 | 686.7979 | 2 | 34.15 |
| LIC11310 |      |      |                              |                                                                                                                        |                                                      |         |           |          |           |          |   |       |
|          | 6    | 20.2 | AINQ                         | No ITRAQ4plex@N-term                                                                                                   | cleaved T-A@N-term; cleaved Q-Y@C-term               | 0.0235  | 444.2567  | 445.2640 | 444.2332  | 445.2405 | 1 | 31.56 |
|          | 6    | 20.2 | ILYLDGVPDLQR                 | ITRAQ4plex@N-term                                                                                                      |                                                      | -0.0139 | 1544.8546 | 773.4346 | 1544.8684 | 773.4415 | 2 | 34.05 |
|          | 6    | 20.2 | INVGNNIEILK                  | ITRAQ4plex@N-term;<br>Deamidated(N)@5;<br>ITRAQ4plex(K)@12                                                             |                                                      | -0.0030 | 1643.9308 | 822.9727 | 1643.9338 | 822.9742 | 2 | 33.44 |
|          | 6    | 20.2 | INVGNNIEILKVDLELEYAAVERFNR   | ITRAQ4plex@N-term;<br>Oxidation(N)@2;<br>Deamidated(N)@6;<br>ITRAQ4plex(K)@12;<br>Oxidation(F)@25;<br>Deamidated(N)@26 | missed K-V@12; missed R-F@24                         | -0.0437 | 3481.7747 | 871.4509 | 3481.8184 | 871.4619 | 4 | 16.28 |
|          | 2.09 | 6.7  | LADFMK                       | ITRAQ4plex@N-term;<br>ITRAQ4plex(K)@6                                                                                  |                                                      | 0.0125  | 1011.5792 | 506.7969 | 1011.5667 | 506.7906 | 2 | 44.05 |
|          | 6    | 20.2 | NWGFK                        | ITRAQ4plex@N-term;<br>Deamidated(N)@1;<br>ITRAQ4plex(K)@5                                                              |                                                      | 0.0514  | 939.5573  | 470.7859 | 939.5058  | 470.7602 | 2 | 31.47 |
|          | 6    | 20.2 | VDLELEYAAVER                 | ITRAQ4plex@N-term                                                                                                      |                                                      | 0.0011  | 1549.8121 | 775.9133 | 1549.8110 | 775.9128 | 2 | 52.56 |
| LIC11334 |      |      |                              |                                                                                                                        |                                                      |         |           |          |           |          |   |       |
|          | 1.7  | 4.9  | DIYSTDYTLQR                  | ITRAQ4plex@N-term                                                                                                      |                                                      | 0.0113  | 1517.7598 | 759.8871 | 1517.7484 | 759.8815 | 2 | 29.88 |
| LIC11355 |      |      |                              |                                                                                                                        |                                                      |         |           |          |           |          |   |       |
|          | 2.01 | 3.4  | IADYK                        | ITRAQ4plex@N-term;<br>ITRAQ4plex(K)@5                                                                                  | cleaved A-I@N-term                                   | 0.0062  | 896.5273  | 449.2709 | 896.5211  | 449.2678 | 2 | 29.80 |
|          | 2.01 | 3.4  | VGRPNVPIIER                  | ITRAQ4plex@N-term                                                                                                      |                                                      | -0.0013 | 1392.8309 | 465.2843 | 1392.8323 | 465.2847 | 3 | 30.57 |
|          | 2.01 | 3.4  | VPIIER                       | ITRAQ4plex@N-term                                                                                                      | cleaved N-V@N-term                                   | 0.0038  | 869.5495  | 435.7820 | 869.5456  | 435.7801 | 2 | 33.04 |
| LIC11359 |      |      |                              |                                                                                                                        |                                                      |         |           |          |           |          |   |       |
|          | 9.28 | 12.2 | IFEIER                       | ITRAQ4plex@N-term                                                                                                      |                                                      | 0.0384  | 949.5739  | 475.7942 | 949.5355  | 475.7750 | 2 | 42.32 |
|          | 9.28 | 12.2 | IMYR                         | ITRAQ4plex@N-term                                                                                                      |                                                      | 0.0192  | 838.5049  | 420.2597 | 838.4857  | 420.2501 | 2 | 40.64 |
| LIC11364 |      |      |                              |                                                                                                                        |                                                      |         |           |          |           |          |   |       |
|          | 6    | 15.2 | DGVTVTALCPGPTK               | No ITRAQ4plex@N-term;<br>Methylthio(C)@9;<br>ITRAQ4plex(K)@14                                                          |                                                      | 0.0225  | 1547.8035 | 516.9418 | 1547.7809 | 516.9343 | 3 | 59.67 |
|          | 6    | 15.2 | EELQMVOVNVASLVELTHLFLQGMVERK | ITRAQ4plex@N-term;<br>Deamidated(O)@22;<br>Deamidated(R)@27;<br>ITRAQ4plex(K)@28                                       | missed R-K@27                                        | 0.0156  | 3529.8923 | 883.4803 | 3529.8768 | 883.4765 | 4 | 35.25 |
|          | 6    | 15.2 | EVAEIGYDALK                  | ITRAQ4plex@N-term;<br>ITRAQ4plex(K)@11                                                                                 |                                                      | 0.0084  | 1494.8258 | 748.4202 | 1494.8173 | 748.4159 | 2 | 30.98 |
|          | 6    | 15.2 | EVAEIGYDALKK                 | ITRAQ4plex@N-term;<br>ITRAQ4plex(K)@11;<br>ITRAQ4plex(K)@12                                                            | missed K-K@11                                        | 0.0043  | 1767.0187 | 590.0135 | 1767.0144 | 590.0121 | 3 | 32.04 |
|          | 6    | 15.2 | GIGYELSKLIAADGYDLILVAR       | No ITRAQ4plex@N-term;<br>ITRAQ4plex(K)@8                                                                               | cleaved M-G@N-term; missed K-L@8                     | -0.0380 | 2493.3584 | 832.1268 | 2493.3965 | 832.1394 | 3 | 56.78 |
|          | 6    | 15.2 | LIAADGYDLILVAR               | ITRAQ4plex@N-term                                                                                                      |                                                      | -0.0077 | 1645.9448 | 823.9797 | 1645.9525 | 823.9835 | 2 | 54.68 |
|          | 6    | 15.2 | SVVIAGALNKILQASVRIITPR       | ITRAQ4plex@N-term;<br>Deamidated(N)@9;<br>ITRAQ4plex(K)@10;<br>Oxidation(R)@17                                         | missed K-I@10; missed R-I@17                         | -0.0050 | 2510.5103 | 503.1093 | 2510.5152 | 503.1103 | 5 | 59.13 |
|          | 6    | 15.2 | VDILSLDLADPK                 | ITRAQ4plex@N-term;<br>ITRAQ4plex(K)@12                                                                                 |                                                      | -0.0052 | 1585.9119 | 793.9632 | 1585.9171 | 793.9658 | 2 | 34.74 |
| LIC11370 |      |      |                              |                                                                                                                        |                                                      |         |           |          |           |          |   |       |
|          | 4.77 | 9.9  | DSLTPVMGALISQISTK            | ITRAQ4plex@N-term;<br>ITRAQ4plex(K)@17                                                                                 |                                                      | -1.9899 | 2046.1532 | 683.0583 | 2048.1431 | 683.7216 | 3 | 37.27 |
|          | 4.77 | 9.9  | GETLIR                       | ITRAQ4plex@N-term                                                                                                      | cleaved D-G@N-term                                   | 0.0117  | 831.5054  | 416.7599 | 831.4936  | 416.7541 | 2 | 26.80 |

|          |       |      |                        |                                                                                                                          |                                   |         |           |           |           |           |   |       |
|----------|-------|------|------------------------|--------------------------------------------------------------------------------------------------------------------------|-----------------------------------|---------|-----------|-----------|-----------|-----------|---|-------|
|          | 4.77  | 9.9  | GEVVVIDENFGVR          | ITRAQ4plex@N-term                                                                                                        |                                   | 0.0542  | 1575.8921 | 788.9533  | 1575.8379 | 788.9262  | 2 | 47.42 |
|          | 4.77  | 9.9  | NVTSPAALVLPDGETLIR     | ITRAQ4plex@N-term                                                                                                        |                                   | 0.0086  | 2009.1365 | 1005.5760 | 2009.1279 | 1005.5712 | 2 | 36.78 |
|          | 4.77  | 9.9  | VQFLSLSTASDLLNLYRR     | ITRAQ4plex@N-term;<br>ITRAQ4plex(S)@6;<br>Deamidated(N)@15                                                               | missed R-R@18                     | -0.0807 | 2497.3340 | 833.4520  | 2497.4148 | 833.4789  | 3 | 45.14 |
| LIC11380 |       |      |                        |                                                                                                                          |                                   |         |           |           |           |           |   |       |
|          | 1.63  | 3.0  | GSIFDELRL              | ITRAQ4plex@N-term                                                                                                        |                                   | 0.0052  | 1079.5786 | 540.7966  | 1079.5733 | 540.7939  | 2 | 32.09 |
|          | 1.63  | 3.0  | NVIVEAIK               | ITRAQ4plex@N-term;<br>ITRAQ4plex(K)@8                                                                                    |                                   | 0.0127  | 1172.7500 | 587.3823  | 1172.7372 | 587.3759  | 2 | 29.73 |
| LIC11389 |       |      |                        |                                                                                                                          |                                   |         |           |           |           |           |   |       |
|          | 2     | 5.1  | FAEELDELEKR            | ITRAQ4plex@N-term;<br>ITRAQ4plex(K)@10                                                                                   | missed K-R@10                     | 0.0102  | 1665.8918 | 556.3046  | 1665.8817 | 556.3012  | 3 | 33.14 |
|          | 2     | 5.1  | LEAEMEK                | ITRAQ4plex@N-term;<br>ITRAQ4plex(K)@7                                                                                    |                                   | 0.0534  | 1136.6526 | 569.3336  | 1136.5991 | 569.3068  | 2 | 27.86 |
|          | 2     | 5.1  | SGGIKTPGVPPDAIESN      | ITRAQ4plex@N-term;<br>ITRAQ4plex(K)@5;<br>Oxidation(P)@10                                                                | cleaved N-P@C-term; missed K-T@5  | -0.0024 | 1959.9969 | 981.0057  | 1959.9993 | 981.0069  | 2 | 33.34 |
|          | 2     | 5.1  | WLSRSGGIKTPGVPPDAIESNP | ITRAQ4plex@N-term;<br>ITRAQ4plex(K)@9                                                                                    | missed R-S@4; missed K-T@9        | -0.0488 | 2583.3049 | 646.8335  | 2583.3536 | 646.8457  | 4 | 40.67 |
| LIC11394 |       |      |                        |                                                                                                                          |                                   |         |           |           |           |           |   |       |
|          | 3.53  | 6.5  | KSEIEEEGR              | ITRAQ4plex@N-term;<br>ITRAQ4plex(K)@1                                                                                    | missed K-S@1                      | -0.0304 | 1492.7310 | 498.5843  | 1492.7613 | 498.5944  | 3 | 27.76 |
|          | 3.53  | 6.5  | LGTIVGKAIDIREIIQASEK   | ITRAQ4plex@N-term;<br>ITRAQ4plex(K)@7;<br>ITRAQ4plex(S)@19;<br>ITRAQ4plex(K)@21                                          | missed K-A@7; missed R-E@12       | 0.1714  | 2858.8643 | 715.7233  | 2858.6928 | 715.6805  | 4 | 7.42  |
|          | 3.53  | 6.5  | QMIQDSKEKVK            | ITRAQ4plex@N-term;<br>ITRAQ4plex(K)@7;<br>ITRAQ4plex(K)@9;<br>ITRAQ4plex(K)@11                                           | cleaved F-Q@N-term; missed K-V@9  | -0.0202 | 1909.0951 | 637.3723  | 1909.1154 | 637.3791  | 3 | 34.01 |
|          | 3.53  | 6.5  | SEIEEEGRK              | ITRAQ4plex@N-term;<br>ITRAQ4plex(K)@10                                                                                   | missed R-K@9                      | -0.0304 | 1492.7310 | 498.5843  | 1492.7613 | 498.5944  | 3 | 27.76 |
|          | 3.53  | 6.5  | VDRGGVIHETDVGAIDAR     | ITRAQ4plex@N-term;<br>ITRAQ4plex(T)@10                                                                                   | missed R-G@3                      | 0.0169  | 2143.2009 | 715.4076  | 2143.1841 | 715.4020  | 3 | 53.28 |
|          | 3.53  | 6.5  | YREENEEQVR             | ITRAQ4plex@N-term                                                                                                        | missed R-E@2                      | -0.0058 | 1494.7126 | 499.2448  | 1494.7185 | 499.2468  | 3 | 25.75 |
| LIC11405 |       |      |                        |                                                                                                                          |                                   |         |           |           |           |           |   |       |
|          | 13.51 | 14.2 | ASSEEGIDLNLQSLSELER    | ITRAQ4plex@N-term                                                                                                        | cleaved L-A@N-term                | 0.0616  | 2233.1812 | 745.4010  | 2233.1196 | 745.3805  | 3 | 9.10  |
|          | 13.51 | 14.2 | DIFEIMK                | ITRAQ4plex@N-term;<br>ITRAQ4plex(K)@7                                                                                    |                                   | 0.0111  | 1182.6674 | 592.3409  | 1182.6562 | 592.3354  | 2 | 41.34 |
|          | 13.51 | 14.2 | GENIVLREEMNEFNKGK      | No ITRAQ4plex@N-term;<br>Oxidation(R)@7;<br>Deamidated(N)@14;<br>ITRAQ4plex(K)@16                                        | missed R-E@7                      | 0.0066  | 2038.9817 | 680.6678  | 2038.9752 | 680.6657  | 3 | 34.99 |
|          | 13.51 | 14.2 | GGITINPDFTIIAFPDR      | ITRAQ4plex@N-term                                                                                                        |                                   | 0.0503  | 1990.1149 | 996.0647  | 1990.0646 | 996.0396  | 2 | 41.51 |
|          | 13.51 | 14.2 | GKYEIVPALIAK           | ITRAQ4plex@N-term;<br>ITRAQ4plex(K)@2;<br>ITRAQ4plex(K)@13                                                               | missed K-Y@2                      | -0.0143 | 1861.1259 | 621.3826  | 1861.1402 | 621.3874  | 3 | 33.59 |
|          | 13.51 | 14.2 | GYKPVFIDFLK            | ITRAQ4plex@N-term;<br>ITRAQ4plex(K)@3;<br>ITRAQ4plex(K)@12                                                               | cleaved L-G@N-term                | -0.0518 | 1887.0353 | 630.0190  | 1887.0871 | 630.0363  | 3 | 34.32 |
|          | 4.53  | 3.3  | LGQIK                  | ITRAQ4plex@N-term;<br>ITRAQ4plex(K)@5                                                                                    | cleaved L-L@N-term                | -0.0014 | 845.5565  | 423.7855  | 845.5578  | 423.7862  | 2 | 36.53 |
|          | 4.53  | 3.3  | LLNIVDIK               | CarbamyI@N-term;<br>ITRAQ4plex(K)@8                                                                                      |                                   | -0.0467 | 1113.6412 | 557.8279  | 1113.6879 | 557.8512  | 2 | 51.98 |
|          | 4.53  | 3.3  | LPYK                   | ITRAQ4plex@N-term;<br>ITRAQ4plex(K)@4                                                                                    |                                   | 0.0056  | 807.5154  | 404.7650  | 807.5098  | 404.7622  | 2 | 37.82 |
|          | 4.53  | 3.3  | LVVHEVNEAR             | CarbamyI@N-term                                                                                                          |                                   | 0.0729  | 1207.7039 | 604.8592  | 1207.6309 | 604.8227  | 2 | 40.27 |
|          | 13.51 | 14.2 | MSNSVLLQELDKLEQNDLK    | ITRAQ4plex@N-term;<br>Deamidated(N)@3;<br>Oxidation(D)@12;<br>ITRAQ4plex(K)@13;<br>Deamidated(N)@17;<br>ITRAQ4plex(K)@20 | missed K-L@13                     | 0.0646  | 2781.4966 | 696.3814  | 2781.4319 | 696.3653  | 4 | 40.87 |
|          | 13.51 | 14.2 | NGKDIFEIMK             | ITRAQ4plex@N-term;<br>ITRAQ4plex(K)@3;<br>Oxidation(M)@9;<br>ITRAQ4plex(K)@10                                            | cleaved F-N@N-term                | 0.0332  | 1641.9457 | 548.3225  | 1641.9125 | 548.3115  | 3 | 33.80 |
|          | 4.53  | 3.3  | NIVLR                  | No ITRAQ4plex@N-term                                                                                                     | cleaved E-N@N-term                | 0.0614  | 613.4526  | 614.4598  | 613.3911  | 614.3984  | 1 | 53.71 |
|          | 13.51 | 14.2 | QMEILPVLKLLNIVDK       | Gln->pyro-Glu@N-term;<br>ITRAQ4plex(K)@10;<br>ITRAQ4plex(K)@18                                                           | cleaved Y-Q@N-term; missed K-L@10 | -0.1292 | 2362.3225 | 788.4481  | 2362.4517 | 788.4912  | 3 | 32.39 |

|          |      |                           |                                                                                                                            |                                                 |         |           |           |           |           |   |       |
|----------|------|---------------------------|----------------------------------------------------------------------------------------------------------------------------|-------------------------------------------------|---------|-----------|-----------|-----------|-----------|---|-------|
| 13.51    | 14.2 | QNDFYKGVLEKLTQLQVTIYSSILK | Gln->pyro-Glu@N-term; Deamidated(N)@2; ITRAQ4plex(K)@7; ITRAQ4plex(K)@12; ITRAQ4plex(K)@26                                 | cleaved F-Q@N-term; missed K-G@7; missed K-L@12 | -0.0913 | 3456.8572 | 865.2216  | 3456.9485 | 865.2444  | 4 | 58.41 |
| 13.51    | 14.2 | RTEQELNPDIGIFPEK          | ITRAQ4plex@N-term; ITRAQ4plex(K)@17                                                                                        | missed R-T@1                                    | -0.0829 | 2286.1636 | 763.0618  | 2286.2463 | 763.0894  | 3 | 34.38 |
| 4.53     | 3.3  | SSILK                     | No ITRAQ4plex@N-term; ITRAQ4plex(K)@5                                                                                      | cleaved Y-S@N-term                              | 0.0171  | 690.4569  | 691.4642  | 690.4398  | 691.4471  | 1 | 58.76 |
| 13.51    | 14.2 | TEQELNPDIGIFPEK           | ITRAQ4plex@N-term; Oxidation(P)@8; ITRAQ4plex(K)@16                                                                        |                                                 | 0.0723  | 2146.2124 | 716.4114  | 2146.1401 | 716.3873  | 3 | 32.89 |
| 13.51    | 14.2 | TKDQNTMELLGQIK            | ITRAQ4plex@N-term; ITRAQ4plex(K)@2; ITRAQ4plex(K)@15                                                                       |                                                 | -0.0094 | 2163.2205 | 722.0807  | 2163.2299 | 722.0839  | 3 | 37.33 |
| 13.51    | 14.2 | VFVIPDEILK                | ITRAQ4plex@N-term; ITRAQ4plex(K)@10                                                                                        |                                                 | 0.0023  | 1459.8917 | 730.9531  | 1459.8894 | 730.9520  | 2 | 35.16 |
| 4.53     | 3.3  | VNIPPINVEMLNLLRK YHLVYQRK | ITRAQ4plex@N-term; Deamidated(N)@2; Deamidated(N)@7; ITRAQ4plex(K)@17; Deamidated(Q)@23; Oxidation(R)@24; ITRAQ4plex(K)@25 | missed R-K@16; missed K-Y@17; missed R-K@24     | -0.0946 | 3529.8750 | 883.4760  | 3529.9696 | 883.4997  | 4 | 50.38 |
| 13.51    | 14.2 | VRTKQNTMELLGQIK           | ITRAQ4plex@N-term; Deamidated(R)@2; ITRAQ4plex(K)@4; Deamidated(N)@7; ITRAQ4plex(K)@17                                     | cleaved L-V@N-term; missed R-T@2                | -0.0245 | 2420.3430 | 807.7883  | 2420.3674 | 807.7964  | 3 | 34.47 |
| 13.51    | 14.2 | VSIYGLHLLK                | ITRAQ4plex@N-term; ITRAQ4plex(K)@10                                                                                        |                                                 | -0.0024 | 1429.8876 | 477.6365  | 1429.8901 | 477.6373  | 3 | 34.56 |
| 13.51    | 14.2 | YHAFEEIAGLVPLEQNLK        | ITRAQ4plex@N-term; ITRAQ4plex(K)@18                                                                                        |                                                 | 0.0053  | 2358.2881 | 787.1033  | 2358.2827 | 787.1015  | 3 | 41.29 |
| 13.51    | 14.2 | YVQTHPILPSVK              | ITRAQ4plex@N-term; ITRAQ4plex(K)@12                                                                                        |                                                 | -0.0105 | 1668.9702 | 557.3307  | 1668.9807 | 557.3342  | 3 | 31.57 |
| LIC11409 |      |                           |                                                                                                                            |                                                 |         |           |           |           |           |   |       |
| 3.43     | 5.2  | AIEFFTK                   | ITRAQ4plex@N-term; ITRAQ4plex(K)@7                                                                                         |                                                 | -0.0230 | 1142.6349 | 572.3247  | 1142.6579 | 572.3362  | 2 | 35.66 |
| 2.29     | 1.9  | DALSAILPFVK               | ITRAQ4plex@N-term; ITRAQ4plex(K)@11                                                                                        |                                                 | -0.0005 | 1460.8842 | 731.4493  | 1460.8846 | 731.4496  | 2 | 50.82 |
| 3.43     | 5.2  | EHPLDFDMSGNEIKPQDFLER     | ITRAQ4plex@N-term; ITRAQ4plex(K)@14                                                                                        |                                                 | -0.0156 | 2787.3552 | 697.8461  | 2787.3708 | 697.8500  | 4 | 38.25 |
| 3.43     | 5.2  | IGEFAEGAVR                | Delta:H(2)C(2)@N-term; Methyl(E)@3                                                                                         |                                                 | 0.0057  | 1087.5719 | 544.7932  | 1087.5662 | 544.7904  | 2 | 32.83 |
| 2.29     | 1.9  | IIMSASRRVTGAR             | ITRAQ4plex@N-term                                                                                                          | missed R-R@8; missed R-V@9                      | -0.0964 | 1689.8467 | 564.2895  | 1689.9430 | 564.3216  | 3 | 29.92 |
| 3.43     | 5.2  | ILPFVK                    | ITRAQ4plex@N-term; ITRAQ4plex(K)@6                                                                                         | cleaved A-I@N-term                              | -0.0048 | 1003.6626 | 502.8386  | 1003.6674 | 502.8410  | 2 | 33.05 |
| 3.43     | 5.2  | ISNKSEIDK                 | ITRAQ4plex@N-term; Oxidation(N)@3; ITRAQ4plex(K)@4; ITRAQ4plex(K)@9                                                        | missed K-S@4                                    | 0.0250  | 1480.8713 | 741.4429  | 1480.8462 | 741.4304  | 2 | 35.53 |
| 3.43     | 5.2  | LAEAYSIPAMKI              | ITRAQ4plex@N-term; Oxidation(P)@8; ITRAQ4plex(K)@11                                                                        | cleaved I-S@C-term; missed K-I@11               | -0.0153 | 1609.8840 | 805.9493  | 1609.8993 | 805.9569  | 2 | 47.64 |
| 3.43     | 5.2  | PGPVLLDFPK                | ITRAQ4plex@N-term; ITRAQ4plex(K)@10                                                                                        | cleaved R-P@N-term                              | 0.0035  | 1369.8248 | 685.9197  | 1369.8213 | 685.9179  | 2 | 52.38 |
| 2.29     | 1.9  | PQDFLER                   | ITRAQ4plex@N-term; Oxidation(P)@1                                                                                          | cleaved K-P@N-term                              | 0.0462  | 1063.5883 | 532.8014  | 1063.5420 | 532.7783  | 2 | 42.99 |
| 2.29     | 1.9  | SADDIAR                   | ITRAQ4plex@N-term; Oxidation(R)@7                                                                                          |                                                 | 0.0432  | 906.4961  | 454.2553  | 906.4529  | 454.2337  | 2 | 39.37 |
| 3.43     | 5.2  | TGAR                      | No ITRAQ4plex@N-term                                                                                                       | cleaved V-T@N-term                              | 0.0304  | 403.2484  | 404.2556  | 403.2179  | 404.2252  | 1 | 47.41 |
| 3.43     | 5.2  | VTGAR                     | ITRAQ4plex@N-term                                                                                                          |                                                 | 0.0410  | 646.4294  | 647.4367  | 646.3884  | 647.3957  | 1 | 57.10 |
| LIC11410 |      |                           |                                                                                                                            |                                                 |         |           |           |           |           |   |       |
| 2        | 11.2 | LPDVLEVEDLAYHDCVSR        | ITRAQ4plex@N-term; Methylthio(C)@15                                                                                        |                                                 | -0.0285 | 2262.0498 | 755.0239  | 2262.0782 | 755.0334  | 3 | 38.36 |
| LIC11413 |      |                           |                                                                                                                            |                                                 |         |           |           |           |           |   |       |
| 4.01     | 4.7  | ASIVSFPSLDFPNSVK          | ITRAQ4plex@N-term; Oxidation(P)@12; ITRAQ4plex(K)@16                                                                       |                                                 | -0.0907 | 2010.9962 | 1006.5050 | 2011.0870 | 1006.5508 | 2 | 54.57 |
| 4.01     | 4.7  | GKEFETALEEK               | ITRAQ4plex@N-term; ITRAQ4plex(K)@2; ITRAQ4plex(K)@11                                                                       |                                                 | -0.0213 | 1711.9146 | 571.6454  | 1711.9358 | 571.6525  | 3 | 31.90 |
| 4.01     | 4.7  | IPVLVK                    | ITRAQ4plex@N-term; Oxidation(P)@2; ITRAQ4plex(K)@6                                                                         |                                                 | 0.0360  | 971.6983  | 486.8564  | 971.6623  | 486.8384  | 2 | 57.82 |

|          |      |      |                       |                                                                                                        |                                        |         |           |          |           |          |   |       |
|----------|------|------|-----------------------|--------------------------------------------------------------------------------------------------------|----------------------------------------|---------|-----------|----------|-----------|----------|---|-------|
|          | 4.01 | 4.7  | LSDLKIDFFQNIQIAQR     | ITRAQ4plex@N-term; ITRAQ4plex(K)@7; Deamidated(Q)@15; Deamidated(Q)@18                                 |                                        | -0.2186 | 2596.1443 | 866.3887 | 2596.3628 | 866.4615 | 3 | 24.61 |
|          | 4.01 | 4.7  | MSPEELSGQVIHVSIPIGK   | ITRAQ4plex@N-term; ITRAQ4plex(S)@14; ITRAQ4plex(K)@18                                                  |                                        | -0.0321 | 2339.2563 | 585.8214 | 2339.2884 | 585.8294 | 4 | 36.47 |
| LIC11421 | 4.01 | 4.7  | QNITPLLEPF            | ITRAQ4plex@N-term                                                                                      | cleaved F-V@C-term                     | 0.1017  | 1314.8323 | 439.2847 | 1314.7305 | 439.2508 | 3 | 41.20 |
|          | 2.03 | 1.3  | AFFS                  | No ITRAQ4plex@N-term                                                                                   | cleaved V-A@N-term; cleaved S-G@C-term | 0.0070  | 470.2235  | 471.2308 | 470.2165  | 471.2238 | 1 | 59.58 |
|          | 2.03 | 1.3  | AILPAK                | ITRAQ4plex@N-term; ITRAQ4plex(K)@6                                                                     |                                        | 0.0751  | 899.6799  | 450.8472 | 899.6048  | 450.8097 | 2 | 55.02 |
|          | 7.22 | 7.2  | ASVNIQISSALILVGLTYK   | ITRAQ4plex@N-term; Deamidated(Q)@6; Phospho(T)@16; ITRAQ4plex(K)@19                                    |                                        | -0.0178 | 2358.2876 | 787.1031 | 2358.3055 | 787.1091 | 3 | 37.16 |
|          | 7.22 | 7.2  | ELRKSATNLMELIADSDK    | ITRAQ4plex@N-term; Oxidation(R)@3; ITRAQ4plex(K)@4; Deamidated(N)@8; Oxidation(D)@17; ITRAQ4plex(K)@18 | missed R-K@3; missed K-S@4             | -0.0235 | 2498.3030 | 833.7749 | 2498.3263 | 833.7827 | 3 | 45.82 |
|          | 7.22 | 7.2  | ENSLSSFLSIANK         | ITRAQ4plex@N-term; ITRAQ4plex(K)@13                                                                    |                                        | -0.1021 | 1696.8219 | 566.6146 | 1696.9239 | 566.6486 | 3 | 33.72 |
|          | 7.22 | 7.2  | FVIIDELIDI            | ITRAQ4plex@N-term; Oxidation(F)@1                                                                      | cleaved Y-F@N-term; cleaved I-N@C-term | -0.0471 | 1348.7141 | 675.3643 | 1348.7612 | 675.3879 | 2 | 31.02 |
|          | 7.22 | 7.2  | GSTFIPK               | ITRAQ4plex@N-term; ITRAQ4plex(T)@3; Oxidation(P)@6; ITRAQ4plex(K)@7                                    |                                        | -0.0132 | 1196.6998 | 599.3572 | 1196.7130 | 599.3638 | 2 | 48.17 |
|          | 7.22 | 7.2  | ITESIWNILR            | ITRAQ4plex@N-term                                                                                      |                                        | 1.0098  | 1388.8043 | 695.4094 | 1387.7945 | 694.9045 | 2 | 36.96 |
|          | 2.03 | 1.3  | LSSSG                 | ITRAQ4plex@N-term                                                                                      | cleaved A-L@N-term; cleaved G-M@C-term | 0.0195  | 593.3337  | 594.3409 | 593.3142  | 594.3215 | 1 | 50.51 |
|          | 7.22 | 7.2  | QEAYDENLEK            | Gln->pyro-Glu@N-term; ITRAQ4plex(K)@10                                                                 |                                        | -0.0018 | 1364.6200 | 683.3173 | 1364.6218 | 683.3182 | 2 | 37.33 |
|          | 7.22 | 7.2  | QGAFQIINSESALK        | Gln->pyro-Glu@N-term; ITRAQ4plex(K)@14                                                                 | cleaved L-Q@N-term                     | 0.1190  | 1631.9832 | 545.0016 | 1631.8641 | 544.9620 | 3 | 33.59 |
|          | 7.22 | 7.2  | QNIYKSQMK             | ITRAQ4plex@N-term; Deamidated(N)@2; ITRAQ4plex(K)@5; ITRAQ4plex(K)@9                                   | missed K-S@5                           | -0.0033 | 1571.8674 | 524.9631 | 1571.8707 | 524.9642 | 3 | 31.92 |
|          | 7.22 | 7.2  | RFEQKNSFEIVR          | No ITRAQ4plex@N-term; Deamidated(Q)@4; ITRAQ4plex(K)@5; Oxidation(N)@6                                 | missed R-F@1; missed K-N@5             | -0.0503 | 1712.8466 | 571.9561 | 1712.8968 | 571.9729 | 3 | 43.71 |
|          | 7.22 | 7.2  | RSEK                  | ITRAQ4plex@N-term; ITRAQ4plex(K)@4                                                                     | cleaved A-R@N-term; missed R-S@1       | 0.1145  | 806.5999  | 404.3072 | 806.4854  | 404.2500 | 2 | 15.49 |
|          | 7.22 | 7.2  | SATNLMELIADSDKFPDLLEK | ITRAQ4plex@N-term; ITRAQ4plex(K)@14; ITRAQ4plex(K)@21                                                  | missed K-F@14                          | -0.0051 | 2781.4785 | 928.1667 | 2781.4836 | 928.1685 | 3 | 40.98 |
|          | 7.22 | 7.2  | TGTLQGAFQIINSESALK    | ITRAQ4plex@N-term; ITRAQ4plex(T)@3; Deamidated(Q)@5; Deamidated(Q)@9; ITRAQ4plex(K)@18                 |                                        | 0.0412  | 2311.3047 | 771.4422 | 2311.2637 | 771.4285 | 3 | 3.01  |
|          | 7.22 | 7.2  | TISSMLASLNVAR         | No ITRAQ4plex@N-term                                                                                   |                                        | -0.0005 | 1361.7333 | 681.8739 | 1361.7337 | 681.8741 | 2 | 37.44 |
|          | 7.22 | 7.2  | TISSMLASLNVAR         | No ITRAQ4plex@N-term; Deamidated(N)@10; Oxidation(R)@13; ITRAQ4plex(K)@14                              | missed R-K@13                          | 0.0354  | 1650.9451 | 826.4798 | 1650.9096 | 826.4621 | 2 | 51.59 |
|          | 7.22 | 7.2  | TNSAVGSK              | ITRAQ4plex@N-term; ITRAQ4plex(T)@1; ITRAQ4plex(K)@8                                                    | cleaved F-T@N-term                     | 0.0287  | 1194.7222 | 598.3683 | 1194.6934 | 598.3540 | 2 | 34.32 |
| LIC11423 |      |      |                       |                                                                                                        |                                        |         |           |          |           |          |   |       |
|          | 4    | 22.1 | ISVGNLPQELTEDELK      | ITRAQ4plex@N-term; ITRAQ4plex(K)@16; ITRAQ4plex(K)@17                                                  | missed K-K@16                          | -0.0135 | 2344.3079 | 782.4432 | 2344.3215 | 782.4478 | 3 | 34.14 |
|          | 4    | 22.1 | QIAVVDSEELKK          | ITRAQ4plex@N-term; ITRAQ4plex(K)@11; ITRAQ4plex(K)@12                                                  | missed K-K@11                          | 0.0017  | 1790.0531 | 597.6917 | 1790.0515 | 597.6911 | 3 | 30.48 |
| LIC11424 |      |      |                       |                                                                                                        |                                        |         |           |          |           |          |   |       |
|          | 2.02 | 10.1 | EDLVIK                | ITRAQ4plex@N-term; ITRAQ4plex(K)@6                                                                     | cleaved A-E@N-term                     | 0.0513  | 1003.6670 | 502.8408 | 1003.6157 | 502.8151 | 2 | 39.40 |
|          | 2.02 | 10.1 | NLGAGEVIK             | ITRAQ4plex@N-term; ITRAQ4plex(K)@9                                                                     | cleaved F-N@N-term                     | -0.0191 | 1187.6926 | 594.8536 | 1187.7118 | 594.8632 | 2 | 28.69 |

|          |      |      |                           |                                                                                                      |                                                   |         |           |           |           |           |   |       |
|----------|------|------|---------------------------|------------------------------------------------------------------------------------------------------|---------------------------------------------------|---------|-----------|-----------|-----------|-----------|---|-------|
|          | 2.02 | 10.1 | NPFTFLNGAGEVIK            | ITRAQ4plex@N-term;<br>Deamidated(N)@1;<br>Oxidation(N)@6;<br>ITRAQ4plex(K)@14                        |                                                   | -0.0516 | 1810.9193 | 906.4669  | 1810.9709 | 906.4927  | 2 | 52.88 |
| LIC11431 |      |      |                           |                                                                                                      |                                                   |         |           |           |           |           |   |       |
|          | 4    | 12.7 | FYQAISHFLAK               | ITRAQ4plex@N-term;<br>ITRAQ4plex(K)@11                                                               |                                                   | 0.0066  | 1611.9082 | 538.3100  | 1611.9017 | 538.3078  | 3 | 37.74 |
|          | 4    | 12.7 | IPYDHLK                   | ITRAQ4plex@N-term;<br>Oxidation(P)@2;<br>ITRAQ4plex(K)@7                                             |                                                   | 0.0049  | 1188.6796 | 595.3470  | 1188.6746 | 595.3446  | 2 | 31.99 |
|          | 4.01 | 13.3 | MLTHDLAYAR                | Carbamylation@N-term                                                                                 |                                                   | -0.0067 | 1232.5905 | 617.3025  | 1232.5972 | 617.3059  | 2 | 43.43 |
|          | 4    | 12.7 | MLTHDLAYARELR             | ITRAQ4plex@N-term;<br>Oxidation(Y)@8                                                                 | missed R-E@10                                     | 0.0059  | 1747.9220 | 583.6479  | 1747.9161 | 583.6460  | 3 | 32.30 |
|          | 4    | 12.7 | SASVEAMER                 | ITRAQ4plex@N-term                                                                                    |                                                   | 0.0067  | 1122.5529 | 562.2837  | 1122.5461 | 562.2803  | 2 | 25.38 |
|          | 4    | 12.7 | VVIY                      | ITRAQ4plex@N-term                                                                                    | cleaved F-V@N-term; cleaved Y-G@C-term            | -0.0034 | 636.3934  | 637.4007  | 636.3968  | 637.4041  | 1 | 55.92 |
| LIC11456 |      |      |                           |                                                                                                      |                                                   |         |           |           |           |           |   |       |
|          | 10.5 | 19.1 | ALNYQFQK                  | ITRAQ4plex@N-term;<br>ITRAQ4plex(K)@8                                                                |                                                   | -0.0197 | 1298.7030 | 650.3588  | 1298.7227 | 650.3686  | 2 | 40.19 |
|          | 10.5 | 19.1 | CILFAR                    | ITRAQ4plex@N-term;<br>Methylthio(C)@1                                                                |                                                   | 0.0137  | 911.4980  | 456.7563  | 911.4843  | 456.7494  | 2 | 46.62 |
|          | 10.5 | 19.1 | DISEVPEQMR                | ITRAQ4plex@N-term                                                                                    |                                                   | -0.0106 | 1346.6516 | 674.3331  | 1346.6622 | 674.3384  | 2 | 38.86 |
|          | 10.5 | 19.1 | ENLLEFISK                 | ITRAQ4plex@N-term;<br>ITRAQ4plex(K)@9                                                                |                                                   | -1.0098 | 1378.7806 | 690.3976  | 1379.7904 | 690.9025  | 2 | 48.49 |
|          | 10.5 | 19.1 | FDLDAFLK                  | ITRAQ4plex@N-term;<br>ITRAQ4plex(K)@8                                                                |                                                   | -0.9242 | 1254.7815 | 628.3980  | 1255.7056 | 628.8601  | 2 | 49.96 |
|          | 10.5 | 19.1 | IGGEADKK                  | Carbamylation@N-term;<br>ITRAQ4plex(K)@7;<br>ITRAQ4plex(K)@8                                         | missed K-K@7                                      | 0.0008  | 1147.6449 | 574.8297  | 1147.6441 | 574.8293  | 2 | 34.18 |
|          | 10.5 | 19.1 | LEFISK                    | ITRAQ4plex@N-term;<br>ITRAQ4plex(K)@6                                                                | cleaved L-L@N-term                                | -0.0834 | 1023.5375 | 512.7760  | 1023.6208 | 512.8177  | 2 | 38.65 |
|          | 10.5 | 19.1 | SKEPQISSLPIDR             | ITRAQ4plex@N-term;<br>ITRAQ4plex(K)@2                                                                |                                                   | -0.0183 | 1756.9744 | 586.6654  | 1756.9927 | 586.6715  | 3 | 42.81 |
|          | 10.5 | 19.1 | VQNIKENLLEFISK            | ITRAQ4plex@N-term;<br>ITRAQ4plex(K)@6;<br>ITRAQ4plex(K)@15                                           |                                                   | -0.0335 | 2235.2505 | 746.0908  | 2235.2840 | 746.1019  | 3 | 54.43 |
|          | 10.5 | 19.1 | YVMHLVESK                 | ITRAQ4plex@N-term;<br>ITRAQ4plex(K)@9                                                                | cleaved L-Y@N-term                                | 0.0006  | 1392.7684 | 465.2634  | 1392.7679 | 465.2632  | 3 | 44.80 |
| LIC11488 |      |      |                           |                                                                                                      |                                                   |         |           |           |           |           |   |       |
|          | 2.52 | 10.4 | AELVNPFLAATIVFR           | ITRAQ4plex@N-term                                                                                    |                                                   | 0.0013  | 1933.0808 | 967.5477  | 1933.0795 | 967.5470  | 2 | 3.95  |
|          | 2.52 | 10.4 | IRGK                      | No ITRAQ4plex@N-term;<br>ITRAQ4plex(K)@4                                                             | cleaved L-I@N-term; missed R-G@2                  | 0.0452  | 616.4594  | 617.4667  | 616.4142  | 617.4215  | 1 | 55.94 |
|          | 2.52 | 10.4 | KPSLGISLFSK               | ITRAQ4plex@N-term;<br>ITRAQ4plex(K)@1;<br>ITRAQ4plex(K)@11                                           |                                                   | -0.0104 | 1607.9872 | 537.0030  | 1607.9976 | 537.0065  | 3 | 36.37 |
|          | 2.01 | 10.4 | LEAATIVFR                 | ITRAQ4plex@N-term                                                                                    | cleaved F-L@N-term                                | -0.0153 | 1162.6678 | 582.3412  | 1162.6832 | 582.3489  | 2 | 48.10 |
|          | 2.52 | 10.4 | SLSFK                     | ITRAQ4plex@N-term;<br>ITRAQ4plex(K)@5                                                                | cleaved I-S@N-term                                | -0.0083 | 868.5179  | 435.2662  | 868.5262  | 435.2704  | 2 | 31.05 |
| LIC11489 |      |      |                           |                                                                                                      |                                                   |         |           |           |           |           |   |       |
|          | 8.01 | 12.2 | ATGFSASETGIR              | ITRAQ4plex@N-term                                                                                    |                                                   | 0.0214  | 1339.7068 | 670.8607  | 1339.6854 | 670.8500  | 2 | 28.28 |
|          | 7.05 | 9.5  | ATGFSASETGIREELS<br>DEAR  | Carbamylation@N-term                                                                                 | missed R-E@12                                     | 0.0056  | 2168.0037 | 1085.0090 | 2167.9982 | 1085.0064 | 2 | 43.58 |
|          | 8.01 | 12.2 | DNPNLMNGFVMEINO<br>ALQEK  | ITRAQ4plex@N-term;<br>Deamidated(N)@7;<br>Deamidated(N)@14;<br>Deamidated(O)@15;<br>ITRAQ4plex(K)@20 |                                                   | 0.0325  | 2595.2764 | 866.0994  | 2595.2440 | 866.0886  | 3 | 48.61 |
|          | 8.01 | 12.2 | DQSLLDLWELK               | ITRAQ4plex@N-term;<br>ITRAQ4plex(K)@11                                                               |                                                   | -0.0139 | 1646.8984 | 824.4565  | 1646.9123 | 824.4634  | 2 | 36.89 |
|          | 7.05 | 9.5  | IASLLGANIQELK             | ITRAQ4plex@N-term;<br>ITRAQ4plex(K)@13                                                               |                                                   | -0.0146 | 1656.9872 | 829.5009  | 1657.0018 | 829.5082  | 2 | 47.61 |
|          | 8.01 | 12.2 | INNSQGPDLR                | ITRAQ4plex@N-term                                                                                    |                                                   | 0.1004  | 1256.7599 | 419.9272  | 1256.6595 | 419.8938  | 3 | 31.57 |
|          | 8.01 | 12.2 | LSGNTQFLK                 | ITRAQ4plex@N-term;<br>Oxidation(F)@7;<br>ITRAQ4plex(K)@9                                             |                                                   | -0.0446 | 1310.6992 | 656.3569  | 1310.7438 | 656.3792  | 2 | 33.82 |
|          | 8.01 | 12.2 | LLLEIR                    | ITRAQ4plex@N-term                                                                                    |                                                   | 0.0643  | 899.6569  | 450.8357  | 899.5926  | 450.8036  | 2 | 51.60 |
|          | 8.01 | 12.2 | NASIIYDTLLNSDLK           | ITRAQ4plex@N-term;<br>ITRAQ4plex(K)@15                                                               |                                                   | -0.0614 | 1967.0205 | 656.6808  | 1967.0819 | 656.7012  | 3 | 32.43 |
|          | 8.01 | 12.2 | NIAPSLAEDPSTLQSC<br>AFQIR | ITRAQ4plex@N-term;<br>Methylthio(C)@16                                                               |                                                   | -0.0137 | 2551.2395 | 851.4205  | 2551.2532 | 851.4250  | 3 | 36.98 |
|          | 8.01 | 12.2 | RKNFLK                    | Protein Terminal Acetyl@N-term;<br>ITRAQ4plex(K)@2;<br>ITRAQ4plex(K)@6                               | cleaved E-R@N-term; missed R-K@1;<br>missed K-N@2 | -0.0090 | 1134.7028 | 568.3586  | 1134.7117 | 568.3631  | 2 | 51.47 |
|          | 8.01 | 12.2 | SFFDVISGK                 | ITRAQ4plex@N-term;<br>ITRAQ4plex(K)@9                                                                |                                                   | 0.0129  | 1286.7244 | 644.3694  | 1286.7114 | 644.3630  | 2 | 44.75 |

|          |       |      |                            |                                                                                 |                                  |         |           |          |           |          |   |       |
|----------|-------|------|----------------------------|---------------------------------------------------------------------------------|----------------------------------|---------|-----------|----------|-----------|----------|---|-------|
|          | 8.01  | 12.2 | VGGPYK                     | ITRAQ4plex@N-term;<br>Oxidation(F)@4;<br>ITRAQ4plex(K)@6                        |                                  | 0.0279  | 923.5599  | 462.7872 | 923.5320  | 462.7733 | 2 | 32.34 |
| LIC11499 |       |      |                            |                                                                                 |                                  |         |           |          |           |          |   |       |
|          | 5.3   | 41.2 | ETLIVTSK                   | ITRAQ4plex@N-term;<br>ITRAQ4plex(K)@8                                           |                                  | -0.0138 | 1177.7024 | 589.8585 | 1177.7162 | 589.8654 | 2 | 28.29 |
|          | 5.3   | 41.2 | GFMTSGDAIDGLNEK            | ITRAQ4plex@N-term;<br>ITRAQ4plex(K)@15                                          |                                  | -0.0637 | 1841.8436 | 921.9291 | 1841.9073 | 921.9609 | 2 | 31.15 |
|          | 5.3   | 41.2 | IHQIIDDAVK                 | ITRAQ4plex@N-term;<br>ITRAQ4plex(K)@10                                          |                                  | 0.0076  | 1438.8464 | 480.6227 | 1438.8387 | 480.6202 | 3 | 54.91 |
|          | 6.28  | 41.2 | IHQIIDDAVKR                | Carbamylation@N-term;<br>ITRAQ4plex(K)@10                                       | missed K-R@10                    | -0.0051 | 1493.8385 | 498.9535 | 1493.8436 | 498.9551 | 3 | 50.15 |
|          | 6.28  | 41.2 | RSTVRPTDF                  | Carbamylation@N-term                                                            | missed R-S@1                     | 0.0041  | 1120.5667 | 561.2906 | 1120.5625 | 561.2885 | 2 | 38.23 |
| LIC11517 |       |      |                            |                                                                                 |                                  |         |           |          |           |          |   |       |
|          | 8     | 9.2  | DGASLVITGILNINGR           | ITRAQ4plex@N-term                                                               | cleaved L-D@N-term               | -0.0837 | 1642.8287 | 822.4216 | 1642.9124 | 822.4635 | 2 | 52.20 |
|          | 8     | 9.2  | DVAVYGHDFTLR               | ITRAQ4plex@N-term                                                               |                                  | 0.0432  | 1535.8286 | 512.9501 | 1535.7854 | 512.9358 | 3 | 43.90 |
|          | 8     | 9.2  | DVYVKDEVSSIQK              | ITRAQ4plex@N-term;<br>ITRAQ4plex(K)@5;<br>ITRAQ4plex(K)@13                      |                                  | -0.0255 | 2005.0479 | 669.3566 | 2005.0733 | 669.3651 | 3 | 30.77 |
|          | 8     | 9.2  | ELLNKPLGGGVDR              | ITRAQ4plex@N-term;<br>ITRAQ4plex(K)@5                                           |                                  | -0.0176 | 1768.0273 | 590.3497 | 1768.0451 | 590.3556 | 3 | 42.09 |
|          | 8     | 9.2  | GGPKVHGQSGVVDVITGDELGSLR   | ITRAQ4plex@N-term;<br>ITRAQ4plex(K)@4                                           | cleaved L-G@N-term; missed K-V@4 | 0.2835  | 2664.7273 | 445.1285 | 2664.4439 | 445.0813 | 6 | 58.30 |
|          | 8     | 9.2  | GLYEEANELGK                | ITRAQ4plex@N-term;<br>ITRAQ4plex(K)@11                                          |                                  | -0.0422 | 1509.7496 | 755.8821 | 1509.7919 | 755.9032 | 2 | 27.86 |
|          | 8     | 9.2  | IGGHVVFVANNSAVASGQIDIGAARK | No ITRAQ4plex@N-term;<br>Oxidation(D)@21;<br>ITRAQ4plex(K)@27                   | missed R-K@26                    | -0.0223 | 2781.4785 | 928.1667 | 2781.5008 | 928.1742 | 3 | 40.98 |
|          | 8     | 9.2  | IIDIR                      | No ITRAQ4plex@N-term                                                            | cleaved S-I@N-term               | 0.0320  | 628.4229  | 629.4301 | 628.3908  | 629.3981 | 1 | 2.25  |
|          | 8     | 9.2  | ILVQHSKDRMTWVERIK          | ITRAQ4plex@N-term;<br>ITRAQ4plex(K)@7;<br>Deamidated(R)@15;<br>ITRAQ4plex(K)@17 | missed R-M@9; missed R-I@15      | -0.0985 | 2571.3701 | 858.1306 | 2571.4685 | 858.1634 | 3 | 46.86 |
|          | 8     | 9.2  | KLLDSIIDIR                 | ITRAQ4plex@N-term;<br>ITRAQ4plex(K)@1;<br>Oxidation(D)@8;<br>Oxidation(R)@10    | missed K-L@1                     | 0.0471  | 1504.9539 | 502.6586 | 1504.9068 | 502.6429 | 3 | 41.31 |
|          | 8     | 9.2  | LLDSIIDIRTPR               | No ITRAQ4plex@N-term;<br>Cation:Na@C-term                                       | missed R-T@9                     | 0.0061  | 1432.8075 | 478.6098 | 1432.8014 | 478.6077 | 3 | 35.13 |
|          | 8     | 9.2  | LYQNWGK                    | ITRAQ4plex@N-term;<br>Deamidated(N)@4;<br>ITRAQ4plex(K)@7                       | cleaved I-L@N-term               | 0.0788  | 1196.7222 | 599.3683 | 1196.6433 | 599.3289 | 2 | 52.85 |
|          | 8     | 9.2  | NILFQNLDYLIR               | ITRAQ4plex@N-term                                                               |                                  | -0.0095 | 1664.9277 | 833.4711 | 1664.9372 | 833.4759 | 2 | 38.11 |
|          | 10.42 | 10.6 | IAVMGPAKG                  | ITRAQ4plex@N-term;<br>ITRAQ4plex(K)@9                                           |                                  | -0.0102 | 1130.6624 | 566.3384 | 1130.6725 | 566.3435 | 2 | 39.35 |
|          | 10.42 | 10.6 | ILVQHSK                    | ITRAQ4plex@N-term;<br>ITRAQ4plex(K)@7                                           |                                  | 0.0065  | 1111.7023 | 556.8584 | 1111.6957 | 556.8551 | 2 | 37.53 |
|          | 10.42 | 10.6 | IVLPGTTR                   | ITRAQ4plex@N-term                                                               |                                  | -0.0087 | 999.6111  | 500.8128 | 999.6199  | 500.8172 | 2 | 40.56 |
|          | 10.42 | 10.6 | LTLIIR                     | ITRAQ4plex@N-term                                                               |                                  | -0.0279 | 871.5698  | 436.7921 | 871.5977  | 436.8061 | 2 | 44.37 |
| LIC11518 |       |      |                            |                                                                                 |                                  |         |           |          |           |          |   |       |
|          | 6.14  | 3.7  | DNLIRLGNILR                | ITRAQ4plex@N-term;<br>Oxidation(R)@5                                            | missed R-L@5                     | -0.0936 | 1455.7708 | 486.2642 | 1455.8643 | 486.2954 | 3 | 45.13 |
|          | 6.14  | 3.7  | DSVVYPMALAPELR             | ITRAQ4plex@N-term                                                               |                                  | 0.0151  | 1703.9189 | 852.9667 | 1703.9038 | 852.9592 | 2 | 34.27 |
|          | 6.14  | 3.7  | EAMEIFDSIGIR               | ITRAQ4plex@N-term                                                               |                                  | 0.1303  | 1523.9078 | 762.9612 | 1523.7776 | 762.8961 | 2 | 55.07 |
|          | 6.14  | 3.7  | EAPDLPPMIK                 | ITRAQ4plex@N-term;<br>Oxidation(P)@6;<br>ITRAQ4plex(K)@10                       |                                  | -0.0048 | 1413.7733 | 707.8939 | 1413.7781 | 707.8963 | 2 | 55.72 |
|          | 6.14  | 3.7  | EAVIPEEFR                  | ITRAQ4plex@N-term                                                               | cleaved L-E@N-term               | 0.1054  | 1232.7578 | 617.3862 | 1232.6523 | 617.3334 | 2 | 47.79 |
|          | 6.14  | 3.7  | EIAACAATHPK                | ITRAQ4plex@N-term;<br>Methylthio(C)@5;<br>ITRAQ4plex(K)@11                      |                                  | 0.0181  | 1444.7592 | 482.5937 | 1444.7410 | 482.5876 | 3 | 29.59 |
|          | 6.14  | 3.7  | IEQIISIAK                  | ITRAQ4plex@N-term;<br>ITRAQ4plex(K)@9                                           |                                  | -0.0143 | 1301.8019 | 651.9082 | 1301.8162 | 651.9154 | 2 | 32.96 |
|          | 6.14  | 3.7  | IIKVDLEIAWK                | ITRAQ4plex@N-term;<br>ITRAQ4plex(K)@3; No<br>ITRAQ4plex(K)@12                   |                                  | 0.0282  | 1730.0504 | 577.6907 | 1730.0222 | 577.6813 | 3 | 58.16 |
|          | 6.14  | 3.7  | LEAVIPEEFRKTETR            | ITRAQ4plex@N-term;<br>ITRAQ4plex(K)@11                                          | missed R-K@10; missed K-T@11     | -0.1863 | 2104.9861 | 702.6693 | 2105.1724 | 702.7314 | 3 | 22.38 |
|          | 6.14  | 3.7  | LFIVEVMK                   | ITRAQ4plex@N-term;<br>Oxidation(F)@2;<br>ITRAQ4plex(K)@8                        | cleaved P-L@N-term               | -0.0132 | 1281.7478 | 641.8812 | 1281.7610 | 641.8878 | 2 | 40.29 |
|          | 6.14  | 3.7  | LTLITRPIGELIK              | ITRAQ4plex@N-term;<br>Deamidated(R)@6;<br>ITRAQ4plex(K)@13                      |                                  | -0.0142 | 1755.0972 | 586.0397 | 1755.1113 | 586.0444 | 3 | 39.00 |
|          | 6.14  | 3.7  | NIHR                       | No ITRAQ4plex@N-term                                                            | cleaved N-N@N-term               | 0.0155  | 538.3131  | 539.3204 | 538.2976  | 539.3049 | 1 | 42.11 |
|          | 6.14  | 3.7  | NPDMGLFVHYK                | ITRAQ4plex@N-term;<br>ITRAQ4plex(K)@11                                          |                                  | 0.0489  | 1607.8862 | 536.9694 | 1607.8374 | 536.9531 | 3 | 47.69 |



|          |       |      |                      |                                                                                                         |                                                  |         |           |          |           |          |   |       |
|----------|-------|------|----------------------|---------------------------------------------------------------------------------------------------------|--------------------------------------------------|---------|-----------|----------|-----------|----------|---|-------|
|          | 6.14  | 3.7  | NWSKPLADEIRDDQGISIR  | ITRAQ4plex@N-term; Deamidated(N)@1; ITRAQ4plex(K)@4                                                     | cleaved M-N@N-term; missed R-D@11                | -0.0160 | 2501.2957 | 834.7725 | 2501.3118 | 834.7779 | 3 | 51.60 |
|          | 6.14  | 3.7  | PIGELIK              | ITRAQ4plex@N-term; Oxidation(P)@1; ITRAQ4plex(K)@7                                                      | cleaved R-P@N-term                               | 0.0276  | 1072.7012 | 537.3578 | 1072.6736 | 537.3441 | 2 | 43.30 |
|          | 6.14  | 3.7  | VVSKPEEVK            | ITRAQ4plex@N-term; ITRAQ4plex(K)@4; ITRAQ4plex(K)@9                                                     |                                                  | -0.0409 | 1445.8409 | 482.9543 | 1445.8819 | 482.9679 | 3 | 28.76 |
| LIC11523 |       |      |                      |                                                                                                         |                                                  |         |           |          |           |          |   |       |
|          | 8.92  | 6.4  | AGDHGKGFVVASEVR      | ITRAQ4plex@N-term; Oxidation(D)@3; Oxidation(H)@4; ITRAQ4plex(K)@6                                      | missed K-G@6                                     | 0.0227  | 1919.0332 | 960.5239 | 1919.0105 | 960.5125 | 2 | 50.43 |
|          | 5.25  | 4.0  | AGNLISQIVPSIR        | ITRAQ4plex@N-term                                                                                       |                                                  | -0.0017 | 1510.8937 | 756.4541 | 1510.8953 | 756.4549 | 2 | 47.15 |
|          | 8.92  | 6.4  | ESVLFFK              | ITRAQ4plex@N-term; ITRAQ4plex(K)@7                                                                      |                                                  | 0.0065  | 1156.6802 | 579.3474 | 1156.6736 | 579.3441 | 2 | 42.38 |
|          | 8.92  | 6.4  | GLNEVVEALER          | ITRAQ4plex@N-term                                                                                       |                                                  | 0.0026  | 1371.7506 | 686.8826 | 1371.7480 | 686.8813 | 2 | 34.72 |
|          | 8.92  | 6.4  | IAEQRKIENEELIRVK     | ITRAQ4plex@N-term; ITRAQ4plex(K)@6; No ITRAQ4plex(K)@16                                                 | missed R-K@5; missed K-I@6; missed R-V@14        | 0.0009  | 2255.3213 | 752.7811 | 2255.3205 | 752.7808 | 3 | 34.86 |
|          | 8.92  | 6.4  | IGTLFSSIEELKEK       | ITRAQ4plex@N-term; ITRAQ4plex(K)@12; ITRAQ4plex(K)@14                                                   |                                                  | -0.0099 | 2025.1624 | 676.0614 | 2025.1723 | 676.0647 | 3 | 37.36 |
|          | 8.92  | 6.4  | ISSGDLTQK            | ITRAQ4plex@N-term; ITRAQ4plex(K)@9                                                                      |                                                  | 0.0004  | 1235.6970 | 618.8558 | 1235.6965 | 618.8555 | 2 | 27.75 |
|          | 5.25  | 4.0  | LEEIEK               | No ITRAQ4plex@N-term; ITRAQ4plex(K)@6                                                                   | cleaved S-L@N-term                               | 0.0621  | 903.5656  | 452.7901 | 903.5035  | 452.7590 | 2 | 37.68 |
|          | 8.92  | 6.4  | LGTVVEVSDVTEQNKIQKQR | ITRAQ4plex@N-term; ITRAQ4plex(K)@15; Deamidated(Q)@17; ITRAQ4plex(K)@18                                 | missed K-I@15; missed K-Q@18                     | -0.0442 | 2790.4800 | 931.1672 | 2790.5241 | 931.1820 | 3 | 21.08 |
|          | 8.92  | 6.4  | LIGTNIDIFHK          | ITRAQ4plex@N-term; ITRAQ4plex(K)@11                                                                     |                                                  | 0.0053  | 1557.9175 | 520.3131 | 1557.9122 | 520.3114 | 3 | 34.06 |
|          | 8.92  | 6.4  | LIGTNIDIFHKNPAYQR    | No ITRAQ4plex@N-term; ITRAQ4plex(K)@11                                                                  | missed K-N@11                                    | 0.0192  | 2143.1853 | 715.4023 | 2143.1660 | 715.3959 | 3 | 51.72 |
|          | 8.92  | 6.4  | LIGTNIDIFHKNPAYQRGLL | ITRAQ4plex@N-term; ITRAQ4plex(K)@11; Deamidated(Q)@16                                                   | cleaved L-D@C-term; missed K-N@11; missed R-G@17 | -0.0717 | 2571.3701 | 858.1306 | 2571.4417 | 858.1545 | 3 | 46.86 |
|          | 8.92  | 6.4  | LSEIIGDIVR           | ITRAQ4plex@N-term                                                                                       |                                                  | -0.0158 | 1370.8097 | 686.4121 | 1370.8255 | 686.4200 | 2 | 56.60 |
|          | 5.25  | 4.0  | LSLGK                | ITRAQ4plex@N-term; ITRAQ4plex(K)@5                                                                      | cleaved Y-L@N-term                               | 0.0044  | 804.5357  | 403.2751 | 804.5313  | 403.2729 | 2 | 38.14 |
|          | 8.92  | 6.4  | NFNIVYMNK            | ITRAQ4plex@N-term; Oxidation(M)@7; ITRAQ4plex(K)@9                                                      |                                                  | 0.0289  | 1445.7870 | 723.9008 | 1445.7581 | 723.8863 | 2 | 58.51 |
|          | 8.92  | 6.4  | QLSNFNLNLMGTNIDSFHK  | ITRAQ4plex@N-term; Deamidated(Q)@1; Deamidated(N)@4; Deamidated(N)@6; Deamidated(N)@9; ITRAQ4plex(K)@20 |                                                  | 0.0900  | 2571.3306 | 858.1175 | 2571.2407 | 858.0875 | 3 | 35.08 |
|          | 8.92  | 6.4  | QTNLLALNAIEAAR       | No ITRAQ4plex@N-term; Oxidation(N)@3                                                                    | cleaved Y-Q@N-term                               | 0.0227  | 1583.8857 | 792.9501 | 1583.8631 | 792.9388 | 2 | 58.32 |
|          | 8.92  | 6.4  | SDFFTDLSSFR          | ITRAQ4plex@N-term                                                                                       |                                                  | 0.0086  | 1464.7094 | 733.3619 | 1464.7007 | 733.3576 | 2 | 35.70 |
|          | 8.92  | 6.4  | TNLLALNAIEAAR        | ITRAQ4plex@N-term                                                                                       | cleaved Q-T@N-term                               | 0.0412  | 1583.9529 | 792.9837 | 1583.9117 | 792.9631 | 2 | 37.52 |
| LIC11531 |       |      |                      |                                                                                                         |                                                  |         |           |          |           |          |   |       |
|          | 21.41 | 56.7 | ADLGAYNR             | ITRAQ4plex@N-term                                                                                       |                                                  | -0.0284 | 1185.5616 | 593.7881 | 1185.5900 | 593.8023 | 2 | 28.13 |
|          | 21.41 | 56.7 | ANSVIGLADDALR        | ITRAQ4plex@N-term                                                                                       |                                                  | -0.0291 | 1457.7668 | 729.8907 | 1457.7960 | 729.9053 | 2 | 33.05 |
|          | 21.41 | 56.7 | ARLNPTASMWFMHGAMNHQR | ITRAQ4plex@N-term; Deamidated(R)@2; Deamidated(N)@4; Oxidation(M)@9; Deamidated(N)@16                   | cleaved F-A@N-term; missed R-L@2                 | -0.0003 | 2518.1423 | 840.3881 | 2518.1426 | 840.3881 | 3 | 37.24 |
|          | 21.41 | 56.7 | AVQAANGIYTEEDR       | ITRAQ4plex@N-term; Deamidated(N)@6                                                                      | cleaved L-A@N-term                               | -0.0079 | 1680.7998 | 841.4072 | 1680.8077 | 841.4111 | 2 | 27.68 |
|          | 21.41 | 56.7 | AYENIQAAESR          | ITRAQ4plex@N-term; Oxidation(R)@11                                                                      | cleaved N-A@N-term                               | -0.0010 | 1410.6851 | 706.3498 | 1410.6861 | 706.3503 | 2 | 26.16 |
|          | 21.41 | 56.7 | DIEKLSSGMRINR        | No ITRAQ4plex@N-term; ITRAQ4plex(K)@4; Deamidated(N)@12                                                 | missed K-L@4; missed R-I@10                      | 0.0059  | 1662.8904 | 832.4525 | 1662.8845 | 832.4495 | 2 | 45.37 |
|          | 21.41 | 56.7 | DTDMAEQMSTFTR        | ITRAQ4plex@N-term                                                                                       |                                                  | 0.0018  | 1675.7322 | 838.8734 | 1675.7304 | 838.8725 | 2 | 31.38 |
|          | 21.41 | 56.7 | FNSESMGK             | ITRAQ4plex@N-term; ITRAQ4plex(K)@8                                                                      |                                                  | 0.0024  | 1186.5920 | 594.3033 | 1186.5896 | 594.3021 | 2 | 27.21 |
|          | 21.41 | 56.7 | GLMNAENIQAAESR       | ITRAQ4plex@N-term                                                                                       |                                                  | -0.0165 | 1809.8636 | 905.9391 | 1809.8801 | 905.9473 | 2 | 32.11 |
|          | 21.41 | 56.7 | IINHNSAIFAHR         | ITRAQ4plex@N-term                                                                                       | cleaved M-H@N-term                               | -0.0217 | 1648.9066 | 550.6428 | 1648.9283 | 550.6501 | 3 | 40.57 |

|          |      |                                       |                                                                                                       |                                                          |                                  |           |           |           |           |          |       |       |
|----------|------|---------------------------------------|-------------------------------------------------------------------------------------------------------|----------------------------------------------------------|----------------------------------|-----------|-----------|-----------|-----------|----------|-------|-------|
| 21.41    | 56.7 | INHNSAIFAH                            | ITRAQ4plex@N-term                                                                                     | cleaved I-I@N-term; cleaved H-R@C-term                   | 0.0790                           | 1379.8221 | 690.9183  | 1379.7432 | 690.8789  | 2        | 56.80 |       |
| 21.41    | 56.7 | INHNSAIFAHRTL                         | ITRAQ4plex@N-term;<br>Deamidated(N)@4                                                                 | cleaved I-I@N-term; cleaved L-K@C-term;<br>missed R-T@12 | -0.0133                          | 1750.9468 | 584.6562  | 1750.9600 | 584.6606  | 3        | 36.06 |       |
| 21.41    | 56.7 | IRDTDMAEQMTSFTR                       | ITRAQ4plex@N-term                                                                                     | missed R-D@2                                             | 0.0111                           | 1944.9266 | 649.3162  | 1944.9155 | 649.3125  | 3        | 32.40 |       |
| 21.41    | 56.7 | KPQTVLQLLK                            | ITRAQ4plex@N-term;<br>ITRAQ4plex(K)@1;<br>ITRAQ4plex(K)@10                                            | cleaved M-K@N-term                                       | 2.8924                           | 1601.9374 | 534.9864  | 1599.0449 | 534.0222  | 3        | 37.69 |       |
| 21.41    | 56.7 | MIINHNSAIFAHR                         | ITRAQ4plex@N-term                                                                                     |                                                          | -0.0198                          | 1779.9490 | 594.3236  | 1779.9688 | 594.3302  | 3        | 39.86 |       |
| 21.41    | 56.7 | MKPQTVLQLLK                           | ITRAQ4plex@N-term;<br>ITRAQ4plex(K)@2;<br>ITRAQ4plex(K)@11                                            | cleaved N-M@N-term                                       | -0.0047                          | 1730.0806 | 577.7008  | 1730.0854 | 577.7024  | 3        | 38.15 |       |
| 21.41    | 56.7 | NAYENIQAAESR                          | ITRAQ4plex@N-term                                                                                     | cleaved M-N@N-term                                       | 1.0155                           | 1509.7496 | 755.8821  | 1508.7341 | 755.3743  | 2        | 27.86 |       |
| 21.41    | 56.7 | NTEDGMSLIQTTEGYL<br>QETHEIVQR         | ITRAQ4plex@N-term;<br>Methyl(Q)@24                                                                    | cleaved M-N@N-term                                       | -0.0642                          | 3049.4143 | 1017.4790 | 3049.4784 | 1017.5001 | 3        | 40.03 |       |
| 21.41    | 56.7 | RAEMNTEDGMSLIQT<br>TEGYLQETHEIVQR     | ITRAQ4plex@N-term                                                                                     | missed R-A@1                                             | -0.0038                          | 3522.6804 | 881.6774  | 3522.6841 | 881.6783  | 4        | 39.26 |       |
| 21.41    | 56.7 | SGLAVSEKMR                            | ITRAQ4plex@N-term;<br>ITRAQ4plex(K)@8;<br>Oxidation(M)@9                                              | cleaved A-S@N-term; missed K-M@8                         | 0.0219                           | 1380.7859 | 691.4002  | 1380.7639 | 691.3892  | 2        | 49.39 |       |
| 21.41    | 56.7 | VDEIDRIASQAEFNK                       | No ITRAQ4plex@N-term;<br>Oxidation(D)@2; Oxidation(D)@5<br>Arg->GluSA(R)@6;<br>ITRAQ4plex(K)@15       | cleaved L-V@N-term; missed R-I@6                         | 0.0124                           | 1866.9093 | 934.4619  | 1866.8969 | 934.4557  | 2        | 30.89 |       |
| 21.41    | 56.7 | VLAVQAANGIYTEEDR                      | ITRAQ4plex@N-term;<br>Deamidated(N)@8                                                                 |                                                          | -0.0159                          | 1892.9443 | 947.4794  | 1892.9602 | 947.4874  | 2        | 31.08 |       |
| 21.41    | 56.7 | YQILTQAATAMLAQAN<br>MKPQTVLQLLK       | ITRAQ4plex@N-term;<br>ITRAQ4plex(K)@18;<br>ITRAQ4plex(K)@27                                           |                                                          | -1.0562                          | 3417.8848 | 855.4785  | 3418.9410 | 855.7425  | 4        | 41.75 |       |
| 12.34    | 30.9 | DLGAYYNR                              | ITRAQ4plex@N-term                                                                                     | cleaved A-D@N-term                                       | 0.0072                           | 1114.5601 | 558.2873  | 1114.5529 | 558.2837  | 2        | 38.50 |       |
| 12.34    | 30.9 | QILTQAATAMLAQAN<br>MKPQTVLQLLK        | ITRAQ4plex@N-term;<br>ITRAQ4plex(K)@17;<br>ITRAQ4plex(K)@26                                           | cleaved Y-Q@N-term                                       | 2.0429                           | 3257.9207 | 815.4874  | 3255.8776 | 814.9767  | 4        | 48.62 |       |
| LIC11532 | 8    | 22.1                                  | DADMAEQIVDYTR                                                                                         | ITRAQ4plex@N-term                                        | -0.0063                          | 1669.7677 | 835.8911  | 1669.7739 | 835.8942  | 2        | 32.43 |       |
| 8        | 22.1 | INRAGDDAIGFAMSEK                      | ITRAQ4plex@N-term;<br>Oxidation(M)@13;<br>ITRAQ4plex(K)@16                                            | missed R-A@3                                             | 0.0090                           | 1998.0173 | 667.0131  | 1998.0084 | 667.0101  | 3        | 35.86 |       |
| 8        | 22.1 | KLVLQLEVDQLIEEVDR                     | ITRAQ4plex@N-term;<br>ITRAQ4plex(K)@1                                                                 | missed K-L@1                                             | 0.0125                           | 2213.2637 | 738.7618  | 2213.2511 | 738.7576  | 3        | 41.94 |       |
| 8        | 22.1 | LVQLQLEVDQLIEEVDR                     | ITRAQ4plex@N-term                                                                                     |                                                          | -0.0037                          | 1941.0503 | 971.5324  | 1941.0541 | 971.5343  | 2        | 39.10 |       |
| 8        | 22.1 | MIINHNSIALR                           | ITRAQ4plex@N-term;<br>Deamidated(N)@6;<br>Phospho(S)@8                                                | cleaved T-M@N-term                                       | 0.0519                           | 1505.8066 | 502.9428  | 1505.7547 | 502.9255  | 3        | 36.43 |       |
| 8        | 22.1 | NGKKQALSSPASANA<br>MIGILDTAISK        | No ITRAQ4plex@N-term;<br>ITRAQ4plex(K)@3;<br>ITRAQ4plex(K)@4;<br>Deamidated(Q)@5;<br>ITRAQ4plex(K)@26 | cleaved A-N@N-term; missed K-K@3;<br>missed K-Q@4        | -0.1469                          | 3018.5281 | 1007.1830 | 3018.6749 | 1007.2322 | 3        | 47.47 |       |
| 8        | 22.1 | NVMDGVSVFIQVTEGTL<br>EQVNNILQR        | ITRAQ4plex@N-term                                                                                     |                                                          | -0.0266                          | 2947.4929 | 983.5049  | 2947.5195 | 983.5138  | 3        | 43.62 |       |
| LIC11553 | 1.7  | 3.3                                   | SYPEVHNELGR                                                                                           | ITRAQ4plex@N-term                                        | 0.0039                           | 1443.7267 | 482.2495  | 1443.7228 | 482.2482  | 3        | 38.69 |       |
| LIC11570 | 1.77 | 1.8                                   | AGGNPTFNRR                                                                                            | ITRAQ4plex@N-term;<br>Oxidation(P)@5                     | cleaved L-A@N-term; missed R-R@9 | 0.0580    | 1248.7026 | 625.3586  | 1248.6445 | 625.3295 | 2     | 44.79 |
| 1.77     | 1.8  | DIHI                                  | ITRAQ4plex@N-term                                                                                     | cleaved G-D@N-term; cleaved I-Y@C-term                   | -0.0038                          | 640.3628  | 641.3701  | 640.3666  | 641.3739  | 1        | 56.98 |       |
| 1.77     | 1.8  | ELIPEEEVDGYRTITQ<br>VIPIENVKPEEPELILK | ITRAQ4plex@N-term;<br>ITRAQ4plex(K)@24;<br>ITRAQ4plex(K)@33                                           | missed R-T@12                                            | -14.0090                         | 4250.3369 | 709.3968  | 4264.3459 | 711.7316  | 6        | 35.65 |       |
| 1.77     | 1.8  | ESNSVIVTATNAEWA<br>EIR                | Glu->pyro-Glu@N-term;<br>Deamidated(N)@11                                                             |                                                          | -0.0929                          | 1971.8608 | 986.9377  | 1971.9538 | 986.9842  | 2        | 28.65 |       |
| 1.77     | 1.8  | ILNKEREIRER                           | ITRAQ4plex@N-term;<br>Deamidated(N)@3;<br>ITRAQ4plex(K)@4                                             | missed R-E@6; missed R-E@9                               | -0.0216                          | 1743.9983 | 873.0064  | 1744.0199 | 873.0172  | 2        | 52.48 |       |
| 1.77     | 1.8  | KPPPPGQMPK                            | ITRAQ4plex@N-term;<br>ITRAQ4plex(K)@1;<br>ITRAQ4plex(K)@11                                            |                                                          | -0.0242                          | 1604.9196 | 535.9805  | 1604.9438 | 535.9885  | 3        | 27.37 |       |
| 1.77     | 1.8  | NGFIFMK                               | ITRAQ4plex@N-term;<br>Deamidated(N)@1;<br>ITRAQ4plex(K)@7                                             |                                                          | 0.0587                           | 1144.6782 | 573.3464  | 1144.6194 | 573.3170  | 2        | 45.59 |       |
| 1.77     | 1.8  | NIAEIALAGGNPTF                        | ITRAQ4plex@N-term                                                                                     | cleaved F-N@C-term                                       | 0.0281                           | 1530.8445 | 511.2888  | 1530.8164 | 511.2794  | 3        | 33.18 |       |
| 1.77     | 1.8  | NILLDESLK                             | ITRAQ4plex@N-term;<br>ITRAQ4plex(K)@9                                                                 |                                                          | -0.0673                          | 1331.7231 | 666.8688  | 1331.7904 | 666.9025  | 2        | 32.44 |       |

|          |       |      |                                           |                                                                                                   |                                        |         |           |           |           |           |   |       |
|----------|-------|------|-------------------------------------------|---------------------------------------------------------------------------------------------------|----------------------------------------|---------|-----------|-----------|-----------|-----------|---|-------|
|          | 1.77  | 1.8  | SGLSK                                     | No iTRAQ4plex@N-term;<br>iTRAQ4plex(K)@5                                                          | cleaved N-S@N-term                     | 0.0162  | 634.3934  | 635.4007  | 634.3772  | 635.3845  | 1 | 54.88 |
|          | 1.77  | 1.8  | SLGFLK                                    | No iTRAQ4plex@N-term;<br>iTRAQ4plex(K)@6                                                          | cleaved F-S@N-term                     | 0.0751  | 807.5728  | 404.7936  | 807.4976  | 404.7561  | 2 | 22.08 |
|          | 1.77  | 1.8  | TNLMVFITPHILDSR                           | iTRAQ4plex@N-term;<br>Deamidated(N)@2                                                             |                                        | -0.0269 | 1900.9934 | 951.5040  | 1901.0203 | 951.5174  | 2 | 51.23 |
| LIC11573 |       |      |                                           |                                                                                                   |                                        |         |           |           |           |           |   |       |
|          | 6     | 35.4 | AAINDPWGTTYK                              | iTRAQ4plex@N-term;<br>iTRAQ4plex(K)@12                                                            |                                        | -0.0043 | 1623.8457 | 812.9301  | 1623.8500 | 812.9323  | 2 | 30.72 |
|          | 6     | 35.4 | DAYELQSHLER                               | iTRAQ4plex@N-term                                                                                 |                                        | 0.0003  | 1503.7443 | 502.2554  | 1503.7440 | 502.2553  | 3 | 38.35 |
|          | 6     | 35.4 | YGTYPSEDOGLEALV<br>EKPTTGDVPEDWKPI<br>LTK | iTRAQ4plex@N-term;<br>iTRAQ4plex(K)@17;<br>iTRAQ4plex(K)@28;<br>iTRAQ4plex(K)@33                  |                                        | -0.0180 | 4252.2095 | 1064.0600 | 4252.2278 | 1064.0642 | 4 | 36.07 |
| LIC11597 |       |      |                                           |                                                                                                   |                                        |         |           |           |           |           |   |       |
|          | 2.62  | 3.1  | AGNTPLEALVTTHDK                           | iTRAQ4plex@N-term;<br>iTRAQ4plex(K)@16                                                            |                                        | 0.0224  | 1967.1156 | 656.7125  | 1967.0931 | 656.7050  | 3 | 53.84 |
|          | 2.62  | 3.1  | FLLQK                                     | iTRAQ4plex@N-term;<br>iTRAQ4plex(K)@5                                                             |                                        | 0.0039  | 935.6087  | 468.8116  | 935.6048  | 468.8097  | 2 | 40.53 |
|          | 2     | 4.8  | IFLPDTLGLVLSPEETF<br>QGVDSLQK             | iTRAQ4plex@N-term;<br>iTRAQ4plex(K)@25                                                            |                                        | -0.0150 | 3033.6367 | 1012.2190 | 3033.6518 | 1012.2245 | 3 | 39.83 |
|          | 2     | 4.8  | ITNRLGISIPK                               | No iTRAQ4plex@N-term;<br>iTRAQ4plex(K)@11                                                         | missed R-L@4                           | -0.0920 | 1354.7498 | 452.5905  | 1354.8418 | 452.6212  | 3 | 28.34 |
|          | 2.62  | 3.1  | LVTPELDFIADVSGR                           | iTRAQ4plex@N-term                                                                                 |                                        | 1.0352  | 1986.1307 | 994.0726  | 1985.0955 | 993.5550  | 2 | 54.99 |
|          | 2     | 4.8  | VETRLEILDVTLR                             | iTRAQ4plex@N-term;<br>Oxidation(R)@4                                                              | missed R-L@4                           | -0.0296 | 1715.9608 | 572.9942  | 1715.9903 | 573.0041  | 3 | 39.30 |
|          | 2     | 4.8  | VLNLLTK                                   | iTRAQ4plex@N-term;<br>iTRAQ4plex(K)@7                                                             |                                        | -0.0020 | 1087.7189 | 544.8667  | 1087.7209 | 544.8677  | 2 | 32.69 |
| LIC11602 |       |      |                                           |                                                                                                   |                                        |         |           |           |           |           |   |       |
|          | 2     | 2.0  | DTSRVSEWASSPK                             | iTRAQ4plex@N-term;<br>Oxidation(D)@1; Oxidation(R)@4<br>iTRAQ4plex(K)@14                          | missed R-V@4                           | 0.0420  | 1882.0096 | 628.3438  | 1881.9676 | 628.3298  | 3 | 36.84 |
|          | 2     | 2.0  | LIDP                                      | No iTRAQ4plex@N-term                                                                              | cleaved G-L@N-term; cleaved P-I@C-term | 0.0110  | 456.2694  | 457.2766  | 456.2584  | 457.2657  | 1 | 56.48 |
|          | 2     | 2.0  | WPLLISSFGK                                | iTRAQ4plex@N-term;<br>iTRAQ4plex(K)@10                                                            |                                        | -0.0053 | 1434.8425 | 718.4285  | 1434.8479 | 718.4312  | 2 | 36.47 |
| LIC11617 |       |      |                                           |                                                                                                   |                                        |         |           |           |           |           |   |       |
|          | 12.79 | 54.5 | EHSVGLVDLLGISQS<br>AASQHLSK               | iTRAQ4plex@N-term;<br>iTRAQ4plex(K)@24                                                            |                                        | -0.9829 | 2791.5083 | 931.5101  | 2792.4912 | 931.8377  | 3 | 45.85 |
|          | 12.79 | 54.5 | ESNQVFYYLK                                | iTRAQ4plex@N-term;<br>iTRAQ4plex(K)@10                                                            |                                        | -0.0119 | 1577.8214 | 789.9180  | 1577.8333 | 789.9239  | 2 | 32.61 |
|          | 12.79 | 54.5 | GIAHPDRLQILFFLSQK                         | iTRAQ4plex@N-term;<br>Oxidation(P)@5;<br>Deamidated(R)@7;<br>Deamidated(Q)@9;<br>iTRAQ4plex(K)@17 | missed R-L@7                           | -0.0975 | 2288.1799 | 763.7339  | 2288.2772 | 763.7664  | 3 | 8.20  |
|          | 12.79 | 54.5 | GISQSAASQHLSK                             | No iTRAQ4plex@N-term;<br>iTRAQ4plex(K)@13                                                         | cleaved L-G@N-term                     | 0.0150  | 1456.7906 | 729.4026  | 1456.7756 | 729.3951  | 2 | 38.19 |
|          | 12.79 | 54.5 | INGILSSR                                  | iTRAQ4plex@N-term;<br>Deamidated(N)@2                                                             |                                        | 0.0068  | 1003.5853 | 502.7999  | 1003.5784 | 502.7965  | 2 | 29.21 |
|          | 12.79 | 54.5 | KESNQVFYYLK                               | iTRAQ4plex@N-term;<br>iTRAQ4plex(K)@1;<br>iTRAQ4plex(K)@11                                        |                                        | -0.0288 | 1850.0015 | 617.6744  | 1850.0304 | 617.6841  | 3 | 45.93 |
|          | 12.79 | 54.5 | KNQLESAIR                                 | iTRAQ4plex@N-term;<br>iTRAQ4plex(K)@1                                                             | missed K-N@1                           | -0.0588 | 1345.7333 | 449.5851  | 1345.7921 | 449.6047  | 3 | 30.45 |
|          | 7.32  | 30.3 | LQILFF                                    | iTRAQ4plex@N-term                                                                                 | cleaved F-L@C-term                     | 0.0004  | 923.5606  | 924.5679  | 923.5602  | 924.5675  | 1 | 54.18 |
|          | 12.79 | 54.5 | LQILFFLSQK                                | iTRAQ4plex@N-term;<br>iTRAQ4plex(K)@10                                                            |                                        | 0.0137  | 1523.9457 | 762.9801  | 1523.9319 | 762.9732  | 2 | 52.42 |
|          | 12.79 | 54.5 | LQILFFLSQKEHSVGE<br>L                     | iTRAQ4plex@N-term;<br>iTRAQ4plex(K)@10                                                            | cleaved L-V@C-term                     | -0.1421 | 2275.1399 | 759.3873  | 2275.2820 | 759.4346  | 3 | 49.10 |
|          | 7.32  | 30.3 | MKINGILSSR                                | iTRAQ4plex@N-term;<br>iTRAQ4plex(K)@2;<br>Deamidated(N)@4                                         | missed K-I@2                           | 0.0183  | 1406.8341 | 469.9520  | 1406.8159 | 469.9459  | 3 | 50.35 |
|          | 12.79 | 54.5 | NQLESAIR                                  | iTRAQ4plex@N-term                                                                                 |                                        | -0.0012 | 1073.5940 | 537.8043  | 1073.5951 | 537.8048  | 2 | 27.72 |
|          | 7.32  | 30.3 | QILFFLSQK                                 | Gln->pyro-Glu@N-term;<br>iTRAQ4plex(K)@9                                                          | cleaved L-Q@N-term                     | -0.0070 | 1249.7123 | 625.8634  | 1249.7192 | 625.8669  | 2 | 53.34 |
|          | 12.79 | 54.5 | YKDLIR                                    | iTRAQ4plex@N-term;<br>iTRAQ4plex(K)@2                                                             |                                        | -0.0134 | 1094.6558 | 548.3351  | 1094.6692 | 548.3419  | 2 | 57.82 |
| LIC11621 |       |      |                                           |                                                                                                   |                                        |         |           |           |           |           |   |       |
|          | 4.06  | 14.4 | LSGQALK                                   | iTRAQ4plex@N-term;<br>iTRAQ4plex(K)@7                                                             | cleaved N-L@N-term                     | 0.0356  | 1003.6626 | 502.8386  | 1003.6270 | 502.8208  | 2 | 33.05 |
|          | 4.06  | 14.4 | NLEAAEEMLSAGFA<br>QILK                    | iTRAQ4plex@N-term;<br>iTRAQ4plex(K)@19                                                            |                                        | -0.0089 | 2351.2197 | 784.7472  | 2351.2286 | 784.7502  | 3 | 39.33 |
|          | 4.06  | 14.4 | NWNTAIDFLK                                | iTRAQ4plex@N-term;<br>iTRAQ4plex(K)@10                                                            |                                        | -0.9955 | 1507.8276 | 754.9211  | 1508.8231 | 755.4188  | 2 | 40.78 |



|          |      |     |                                |                                                                                  |                                                                   |         |           |          |           |          |   |       |
|----------|------|-----|--------------------------------|----------------------------------------------------------------------------------|-------------------------------------------------------------------|---------|-----------|----------|-----------|----------|---|-------|
|          | 2.14 | 1.3 | AQEIQNNKELIRLNE<br>ELTQR       | No iTRAQ4plex@N-term;<br>iTRAQ4plex(K)@6;<br>iTRAQ4plex(K)@9;<br>Oxidation(R)@21 | missed K-N@6; missed R-L@13                                       | -0.1264 | 2870.4553 | 718.6211 | 2870.5818 | 718.6527 | 4 | 44.02 |
|          | 4.79 | 2.8 | DQGISTQR                       | iTRAQ4plex@N-term                                                                |                                                                   | 0.0182  | 1148.6090 | 575.3118 | 1148.5907 | 575.3027 | 2 | 50.25 |
|          | 2.14 | 1.3 | DQGISTQRTFLETIER               | iTRAQ4plex@N-term;<br>Deamidated(Q)@8                                            | missed R-T@9                                                      | 0.0251  | 2139.1182 | 714.0466 | 2139.0930 | 714.0383 | 3 | 41.23 |
|          | 2.14 | 1.3 | EKIPNTMAVQK                    | iTRAQ4plex@N-term;<br>iTRAQ4plex(K)@2;<br>iTRAQ4plex(K)@11                       | missed K-I@2                                                      | 0.0240  | 1690.0054 | 564.3424 | 1689.9813 | 564.3344 | 3 | 29.59 |
|          | 2.14 | 1.3 | GPTRALLK                       | No iTRAQ4plex@N-term;<br>iTRAQ4plex(K)@8                                         | cleaved L-G@N-term; missed R-A@4                                  | -0.0105 | 998.6254  | 500.3200 | 998.6358  | 500.3252 | 2 | 33.91 |
|          | 2.14 | 1.3 | IILNLISNAFK                    | iTRAQ4plex@N-term;<br>iTRAQ4plex(K)@11                                           |                                                                   | -0.0414 | 1532.9120 | 767.4633 | 1532.9534 | 767.4840 | 2 | 38.83 |
|          | 4.79 | 2.8 | ILCELK                         | iTRAQ4plex@N-term;<br>Methylthio(C)@3;<br>iTRAQ4plex(K)@6                        |                                                                   | 0.0560  | 1051.6575 | 526.8360 | 1051.6013 | 526.8079 | 2 | 46.33 |
|          | 2.14 | 1.3 | INSTDLK                        | iTRAQ4plex@N-term;<br>iTRAQ4plex(K)@7                                            | cleaved M-I@N-term                                                | 0.0560  | 1077.6833 | 539.8489 | 1077.6274 | 539.8210 | 2 | 40.56 |
|          | 2.14 | 1.3 | LFPDLR                         | No iTRAQ4plex@N-term                                                             | cleaved I-L@N-term                                                | 0.0371  | 759.4650  | 760.4723 | 759.4279  | 760.4352 | 1 | 55.76 |
|          | 2.14 | 1.3 | LNEELTQREIREIQEVY<br>QRLFNMDQL | iTRAQ4plex@N-term;<br>Deamidated(N)@21;<br>Deamidated(Q)@24                      | cleaved L-K@C-term; missed R-E@8;<br>missed R-E@10; missed R-L@18 | 0.0345  | 3339.6873 | 835.9291 | 3339.6527 | 835.9205 | 4 | 36.97 |
|          | 4.79 | 2.8 | NGAALK                         | iTRAQ4plex@N-term;<br>iTRAQ4plex(K)@6                                            | cleaved A-N@N-term                                                | 0.0244  | 860.5568  | 431.2856 | 860.5323  | 431.2734 | 2 | 38.83 |
|          | 2.14 | 1.3 | NLSMAVDGKQGLEK                 | iTRAQ4plex@N-term;<br>iTRAQ4plex(K)@9;<br>iTRAQ4plex(K)@14                       | cleaved F-N@N-term; missed K-Q@9                                  | 0.0131  | 1921.0800 | 641.3672 | 1921.0668 | 641.3629 | 3 | 44.13 |
|          | 2.14 | 1.3 | NVVYMNHLIQDLLSFH<br>K          | iTRAQ4plex@N-term;<br>iTRAQ4plex(K)@17                                           |                                                                   | 0.0114  | 2358.2876 | 590.5792 | 2358.2762 | 590.5763 | 4 | 55.26 |
|          | 2.14 | 1.3 | PALMSSINELK                    | iTRAQ4plex@N-term;<br>Oxidation(P)@1;<br>Deamidated(N)@8;<br>iTRAQ4plex(K)@11    | cleaved V-P@N-term                                                | 0.0007  | 1506.8214 | 754.4180 | 1506.8207 | 754.4176 | 2 | 33.65 |
|          | 4.79 | 2.8 | RPESEGGFEEK                    | Carbamylation@N-term;<br>iTRAQ4plex(K)@12                                        |                                                                   | 0.0200  | 1507.7224 | 754.8685 | 1507.7025 | 754.8585 | 2 | 35.43 |
|          | 2.14 | 1.3 | RTPLTLILGTPTRALLKD<br>QGISTQR  | iTRAQ4plex@N-term;<br>iTRAQ4plex(K)@16;<br>Deamidated(Q)@18                      | cleaved L-R@N-term; missed R-T@1;<br>missed R-A@12                | 0.1189  | 3037.9045 | 760.4834 | 3037.7855 | 760.4537 | 4 | 54.15 |
|          | 4.79 | 2.8 | SQFFANVSHELK                   | iTRAQ4plex@N-term                                                                |                                                                   | 0.0163  | 1577.8236 | 526.9485 | 1577.8072 | 526.9430 | 3 | 47.09 |
|          | 4.79 | 2.8 | TPLTLILGPTR                    | iTRAQ4plex@N-term                                                                |                                                                   | -0.0087 | 1324.8114 | 663.4130 | 1324.8200 | 663.4173 | 2 | 47.72 |
| LIC11713 |      |     |                                |                                                                                  |                                                                   |         |           |          |           |          |   |       |
|          | 5.54 | 7.1 | ALSVLHYFLESK                   | iTRAQ4plex@N-term;<br>iTRAQ4plex(K)@12                                           |                                                                   | 0.0094  | 1693.9740 | 565.6653 | 1693.9647 | 565.6622 | 3 | 38.86 |
|          | 5.54 | 7.1 | DLIDGLKEDLER                   | iTRAQ4plex@N-term;<br>iTRAQ4plex(K)@7                                            |                                                                   | 0.0079  | 1702.9424 | 568.6547 | 1702.9345 | 568.6521 | 3 | 35.49 |
|          | 5.54 | 7.1 | EILGNYPGNLIIIEGHTD<br>NVPIR    | Glu->pyro-Glu@N-term;<br>Deamidated(N)@19;<br>Oxidation(P)@21                    |                                                                   | -0.0468 | 2545.2710 | 849.4309 | 2545.3177 | 849.4465 | 3 | 38.24 |
|          | 5.54 | 7.1 | IEGHTDNVPIR                    | iTRAQ4plex@N-term;<br>Oxidation(H)@4                                             | cleaved I-I@N-term                                                | 0.0546  | 1409.7931 | 705.9038 | 1409.7385 | 705.8765 | 2 | 54.49 |
|          | 5.54 | 7.1 | IKEILGNYPGNLIIIEGH<br>TDNV     | No iTRAQ4plex@N-term;<br>iTRAQ4plex(K)@2                                         | cleaved V-P@C-term                                                | -0.0633 | 2565.3291 | 642.3395 | 2565.3924 | 642.3554 | 4 | 40.35 |
|          | 5.54 | 7.1 | IRSLEELLSREK                   | iTRAQ4plex@N-term;<br>Deamidated(R)@2;<br>Deamidated(R)@10;<br>iTRAQ4plex(K)@12  | missed R-S@2; missed R-E@10                                       | 0.0553  | 1762.0632 | 588.3617 | 1762.0080 | 588.3433 | 3 | 34.23 |
|          | 5.54 | 7.1 | ITLEIELDSLR                    | iTRAQ4plex@N-term                                                                |                                                                   | -0.0116 | 1444.8143 | 723.4144 | 1444.8259 | 723.4202 | 2 | 50.56 |
|          | 5.54 | 7.1 | LDLSLRTK                       | iTRAQ4plex@N-term                                                                | cleaved E-L@N-term; missed R-T@5                                  | -0.0066 | 1003.5831 | 502.7988 | 1003.5896 | 502.8021 | 2 | 29.42 |
|          | 1.49 | 0.0 | RVDIVVVPK                      | Carbamylation@N-term                                                             | missed R-V@1                                                      | 0.0786  | 1094.7347 | 548.3746 | 1094.6560 | 548.3353 | 2 | 41.53 |
|          | 5.54 | 7.1 | SLEELLSR                       | iTRAQ4plex@N-term                                                                |                                                                   | 0.0039  | 1089.6190 | 545.8168 | 1089.6152 | 545.8149 | 2 | 32.40 |
| LIC11766 |      |     |                                |                                                                                  |                                                                   |         |           |          |           |          |   |       |
|          | 1.45 | 1.9 | GVKVKIL                        | iTRAQ4plex@N-term;<br>iTRAQ4plex(K)@3                                            | cleaved L-G@N-term; cleaved L-F@C-term;<br>missed K-V@3           | 0.0311  | 915.6672  | 458.8409 | 915.6361  | 458.8253 | 2 | 53.12 |
|          | 1.45 | 1.9 | LGIGVK                         | iTRAQ4plex@N-term;<br>iTRAQ4plex(K)@6                                            |                                                                   | -0.0011 | 873.5881  | 437.8013 | 873.5891  | 437.8018 | 2 | 39.56 |
|          | 1.45 | 1.9 | LTIRPSGTEPK                    | iTRAQ4plex@N-term;<br>iTRAQ4plex(K)@11                                           |                                                                   | -0.0101 | 1485.8657 | 496.2959 | 1485.8759 | 496.2992 | 3 | 39.21 |
| LIC11780 |      |     |                                |                                                                                  |                                                                   |         |           |          |           |          |   |       |
|          | 1.4  | 2.9 | AIRPPTVNVPR                    | iTRAQ4plex@N-term                                                                |                                                                   | -0.0179 | 1362.8038 | 455.2752 | 1362.8218 | 455.2812 | 3 | 41.17 |
|          | 1.4  | 2.9 | ILDGIR                         | No iTRAQ4plex@N-term                                                             | cleaved S-I@N-term                                                | 0.0031  | 685.4154  | 686.4227 | 685.4123  | 686.4196 | 1 | 58.89 |
|          | 1.4  | 2.9 | ITYT                           | iTRAQ4plex@N-term                                                                | cleaved F-I@N-term; cleaved T-S@C-term                            | 0.0024  | 640.3578  | 641.3651 | 640.3554  | 641.3627 | 1 | 59.26 |
| LIC11782 |      |     |                                |                                                                                  |                                                                   |         |           |          |           |          |   |       |
|          | 4.36 | 7.8 | AEIENHLISQK                    | iTRAQ4plex@N-term;<br>iTRAQ4plex(K)@11                                           |                                                                   | -0.0150 | 1568.8616 | 523.9611 | 1568.8766 | 523.9661 | 3 | 29.11 |

|          |      |     |                              |                                                                                              |                                        |         |           |          |           |          |   |       |
|----------|------|-----|------------------------------|----------------------------------------------------------------------------------------------|----------------------------------------|---------|-----------|----------|-----------|----------|---|-------|
|          | 4.36 | 7.8 | ASQGK                        | No iTRAQ4plex@N-term;<br>Deamidated(Q)@3;<br>iTRAQ4plex(K)@5                                 | cleaved S-A@N-term                     | 0.0526  | 634.3934  | 635.4007 | 634.3408  | 635.3481 | 1 | 54.88 |
|          | 4.36 | 7.8 | AVYEQYK                      | iTRAQ4plex@N-term;<br>iTRAQ4plex(K)@7                                                        |                                        | 0.0042  | 1187.6472 | 594.8309 | 1187.6430 | 594.8288 | 2 | 27.93 |
|          | 4.36 | 7.8 | DNSGNLPKDRVLDLAR             | iTRAQ4plex@N-term;<br>iTRAQ4plex(K)@8;<br>Deamidated(R)@10                                   | cleaved F-D@N-term; missed R-V@10      | 0.0187  | 2071.1453 | 691.3890 | 2071.1266 | 691.3828 | 3 | 42.89 |
|          | 3.07 | 3.2 | DNTILAGNPNPSIGPENAK          | iTRAQ4plex@N-term;<br>Oxidation(N)@2;<br>Oxidation(P)@14;<br>iTRAQ4plex(K)@18                |                                        | 0.0560  | 2144.1514 | 715.7244 | 2144.0953 | 715.7057 | 3 | 57.51 |
|          | 4.36 | 7.8 | ELLEPSVSAPSIEEMR             | iTRAQ4plex@N-term                                                                            |                                        | -0.0070 | 1929.9769 | 965.9957 | 1929.9839 | 965.9992 | 2 | 34.78 |
|          | 4.36 | 7.8 | IARKFYSETNDR                 | iTRAQ4plex@N-term;<br>Deamidated(R)@3;<br>iTRAQ4plex(K)@4;<br>Oxidation(F)@5; Oxidation(Y)@6 | missed R-K@3; missed K-F@4             | 0.0911  | 1820.0220 | 607.6813 | 1819.9308 | 607.6509 | 3 | 37.84 |
|          | 4.36 | 7.8 | NVSEKELLEPSVSAPSIEEMRAVYEQYK | iTRAQ4plex@N-term;<br>iTRAQ4plex(K)@5;<br>iTRAQ4plex(S)@16;<br>iTRAQ4plex(K)@28              | missed R-A@21                          | 0.0881  | 3801.0874 | 951.2791 | 3800.9994 | 951.2571 | 4 | 38.88 |
|          | 3.07 | 3.2 | RSQSVNSQLR                   | iTRAQ4plex@N-term                                                                            | missed R-S@1                           | 0.0088  | 1317.7324 | 440.2514 | 1317.7235 | 440.2484 | 3 | 35.83 |
|          | 3.07 | 3.2 | VKELPLLR                     | iTRAQ4plex@N-term;<br>iTRAQ4plex(K)@2                                                        |                                        | -0.0027 | 1238.7927 | 413.9382 | 1238.7954 | 413.9391 | 3 | 43.36 |
|          | 3.07 | 3.2 | VLSEFASK                     | Carbamylation@N-term;<br>iTRAQ4plex(K)@8                                                     |                                        | -0.0044 | 1066.5737 | 534.2941 | 1066.5781 | 534.2963 | 2 | 47.14 |
|          | 3.07 | 3.2 | VVSLAAK                      | iTRAQ4plex@N-term;<br>iTRAQ4plex(K)@7                                                        |                                        | 0.0031  | 974.6399  | 488.3272 | 974.6368  | 488.3257 | 2 | 38.08 |
|          | 4.36 | 7.8 | VYEQYK                       | iTRAQ4plex@N-term;<br>iTRAQ4plex(K)@6                                                        | cleaved A-V@N-term                     | 0.0056  | 1116.6115 | 559.3130 | 1116.6059 | 559.3102 | 2 | 27.31 |
|          | 3.07 | 3.2 | YWEFFK                       | iTRAQ4plex@N-term;<br>iTRAQ4plex(K)@6                                                        |                                        | 0.0279  | 1206.6597 | 604.3371 | 1206.6317 | 604.3231 | 2 | 48.95 |
| LIC11784 |      |     |                              |                                                                                              |                                        |         |           |          |           |          |   |       |
|          | 2.24 | 6.6 | FLLVVPESQR                   | iTRAQ4plex@N-term                                                                            |                                        | 0.0007  | 1330.7738 | 666.3942 | 1330.7731 | 666.3938 | 2 | 32.74 |
|          | 2.24 | 6.6 | GSAGIGTPPEEGDR               | iTRAQ4plex@N-term                                                                            |                                        | -1.0293 | 1484.6888 | 743.3517 | 1485.7181 | 743.8663 | 2 | 25.51 |
| LIC11790 |      |     |                              |                                                                                              |                                        |         |           |          |           |          |   |       |
|          | 6    | 9.2 | DLIVSLNPAIPGVK               | iTRAQ4plex@N-term;<br>iTRAQ4plex(K)@14                                                       |                                        | 0.0174  | 1739.0974 | 580.7064 | 1739.0800 | 580.7006 | 3 | 2.42  |
|          | 2.03 | 2.2 | IFCSTLLEK                    | iTRAQ4plex@N-term;<br>Methylthio(C)@3;<br>iTRAQ4plex(K)@9                                    |                                        | 0.0169  | 1386.7664 | 694.3904 | 1386.7495 | 694.3820 | 2 | 49.33 |
|          | 6    | 9.2 | KGEDIVSFGAGEPDFETPSHIR       | iTRAQ4plex@N-term;<br>iTRAQ4plex(K)@1                                                        | missed K-G@1                           | -0.0190 | 2675.3245 | 669.8384 | 2675.3435 | 669.8431 | 4 | 38.00 |
|          | 2.03 | 2.2 | QAAAQ                        | Gln->pyro-Glu@N-term                                                                         | cleaved S-Q@N-term; cleaved Q-A@C-term | 0.0362  | 470.2487  | 471.2560 | 470.2125  | 471.2198 | 1 | 58.10 |
|          | 6    | 9.2 | RDLIVSLNPAIPGVK              | iTRAQ4plex@N-term;<br>iTRAQ4plex(K)@15                                                       | missed R-D@1                           | -0.0071 | 1895.1742 | 632.7320 | 1895.1812 | 632.7343 | 3 | 46.13 |
|          | 6    | 9.2 | TYSMTGWRIGYGAGDLNIVK         | No iTRAQ4plex@N-term;<br>iTRAQ4plex(K)@20                                                    | missed R-I@8                           | -0.0945 | 2345.1016 | 782.7078 | 2345.1960 | 782.7393 | 3 | 33.82 |
| LIC11791 |      |     |                              |                                                                                              |                                        |         |           |          |           |          |   |       |
|          | 6.77 | 6.3 | ISPLSLWNAASIK                | iTRAQ4plex@N-term;<br>iTRAQ4plex(K)@13                                                       |                                        | -0.0600 | 1686.9313 | 844.4729 | 1686.9912 | 844.5029 | 2 | 49.30 |
|          | 6.77 | 6.3 | SKPLIVQSDR                   | iTRAQ4plex@N-term;<br>iTRAQ4plex(K)@2                                                        | cleaved M-S@N-term                     | 0.0014  | 1429.8511 | 477.6243 | 1429.8496 | 477.6238 | 3 | 39.12 |
|          | 6.77 | 6.3 | SPEYLHTYR                    | iTRAQ4plex@N-term                                                                            |                                        | 0.0203  | 1308.6787 | 437.2335 | 1308.6584 | 437.2268 | 3 | 38.61 |
|          | 6.77 | 6.3 | VNMEDDLR                     | No iTRAQ4plex@N-term;<br>Oxidation(N)@2; Oxidation(R)@8                                      |                                        | 0.1186  | 1022.5525 | 512.2835 | 1022.4339 | 512.2242 | 2 | 45.20 |
|          | 6.77 | 6.3 | YGFNLRPTSISGK                | iTRAQ4plex@N-term;<br>iTRAQ4plex(K)@13                                                       |                                        | -0.0175 | 1726.9435 | 576.6551 | 1726.9610 | 576.6609 | 3 | 43.89 |
| LIC11793 |      |     |                              |                                                                                              |                                        |         |           |          |           |          |   |       |
|          | 4    | 8.5 | GRPGKNPSELR                  | iTRAQ4plex@N-term;<br>Oxidation(R)@2;<br>iTRAQ4plex(K)@5                                     | missed K-N@5                           | -0.0554 | 1513.8014 | 505.6078 | 1513.8569 | 505.6262 | 3 | 46.14 |
|          | 2.01 | 4.6 | IFTASQALQHGLIDK              | iTRAQ4plex@N-term;<br>iTRAQ4plex(K)@15                                                       |                                        | 0.0109  | 1929.1036 | 644.0418 | 1929.0927 | 644.0382 | 3 | 48.40 |
|          | 4    | 8.5 | ILIIPIDGVISDEGEK             | iTRAQ4plex@N-term;<br>iTRAQ4plex(K)@16                                                       |                                        | -0.0037 | 1998.1455 | 667.0558 | 1998.1492 | 667.0570 | 3 | 36.12 |
|          | 4    | 8.5 | ISGQ                         | iTRAQ4plex@N-term                                                                            | cleaved L-I@N-term; cleaved Q-N@C-term | 0.0244  | 547.3333  | 548.3405 | 547.3088  | 548.3160 | 1 | 42.24 |
|          | 4    | 8.5 | LLQSIVDDLFEK                 | iTRAQ4plex@N-term;<br>iTRAQ4plex(K)@12                                                       |                                        | -0.0207 | 1706.9491 | 854.4818 | 1706.9698 | 854.4922 | 2 | 41.14 |
|          | 2.01 | 4.6 | LSNYK                        | iTRAQ4plex@N-term;<br>Deamidated(N)@3;<br>iTRAQ4plex(K)@5                                    | cleaved A-L@N-term                     | 0.0000  | 912.5161  | 457.2653 | 912.5160  | 457.2653 | 2 | 36.78 |

|          |      |      |                                  |                                                                                                    |                                                            |         |           |          |           |          |   |       |
|----------|------|------|----------------------------------|----------------------------------------------------------------------------------------------------|------------------------------------------------------------|---------|-----------|----------|-----------|----------|---|-------|
|          | 2.01 | 4.6  | VNANLFPSK                        | ITRAQ4plex@N-term;<br>Dioxidation(P)@7;<br>ITRAQ4plex(K)@9                                         | cleaved P-V@N-term                                         | 0.0320  | 1308.7603 | 655.3874 | 1308.7281 | 655.3713 | 2 | 51.73 |
| LIC11799 |      |      |                                  |                                                                                                    |                                                            |         |           |          |           |          |   |       |
|          | 2    | 2.0  | ASSVK                            | No ITRAQ4plex@N-term;<br>ITRAQ4plex(K)@5                                                           | cleaved Y-A@N-term                                         | 0.0000  | 634.3772  | 635.3845 | 634.3772  | 635.3845 | 1 | 54.37 |
|          | 2    | 2.0  | GFFPSVVDLK                       | ITRAQ4plex@N-term;<br>ITRAQ4plex(K)@10                                                             |                                                            | 0.0037  | 1395.8043 | 698.9094 | 1395.8006 | 698.9076 | 2 | 34.59 |
|          | 2    | 2.0  | LKTSKEFSPQMK                     | ITRAQ4plex@N-term;<br>ITRAQ4plex(K)@2;<br>ITRAQ4plex(K)@5;<br>ITRAQ4plex(S)@8;<br>ITRAQ4plex(K)@12 | missed K-T@2                                               | -0.1039 | 2143.1604 | 715.3941 | 2143.2644 | 715.4287 | 3 | 58.79 |
| LIC11820 |      |      |                                  |                                                                                                    |                                                            |         |           |          |           |          |   |       |
|          | 2    | 3.3  | EFYLK                            | ITRAQ4plex@N-term;<br>ITRAQ4plex(K)@5                                                              | cleaved V-E@N-term                                         | 0.0003  | 986.5684  | 494.2914 | 986.5681  | 494.2913 | 2 | 40.75 |
|          | 2    | 3.3  | LSALNNIQK                        | ITRAQ4plex@N-term;<br>Deamidated(N)@5;<br>ITRAQ4plex(K)@9                                          | cleaved F-L@N-term                                         | 0.0230  | 1288.7825 | 645.3985 | 1288.7594 | 645.3870 | 2 | 49.71 |
|          | 2    | 3.3  | TALSMLSSER                       | ITRAQ4plex@N-term                                                                                  |                                                            | 0.0012  | 1350.7311 | 676.3728 | 1350.7299 | 676.3722 | 2 | 46.94 |
| LIC11826 |      |      |                                  |                                                                                                    |                                                            |         |           |          |           |          |   |       |
|          | 2    | 3.9  | GAIKSFFIK                        | ITRAQ4plex@N-term;<br>ITRAQ4plex(K)@4;<br>Oxidation(F)@7;<br>ITRAQ4plex(K)@9                       | cleaved M-G@N-term; missed K-S@4                           | -0.0628 | 1457.8344 | 729.9244 | 1457.8972 | 729.9559 | 2 | 38.66 |
|          | 2.31 | 4.3  | LFRLGK                           | No ITRAQ4plex@N-term;<br>ITRAQ4plex(K)@7                                                           | missed R-L@3                                               | -0.0233 | 1005.5860 | 503.8003 | 1005.6093 | 503.8119 | 2 | 37.93 |
|          | 2    | 3.9  | RPEEETPPVR                       | ITRAQ4plex@N-term                                                                                  |                                                            | -0.0079 | 1352.7091 | 451.9103 | 1352.7170 | 451.9129 | 3 | 25.89 |
|          | 2.31 | 4.3  | RRPEEETPPVR                      | Carbamyl@N-term                                                                                    | missed R-R@1                                               | 0.0002  | 1407.7220 | 470.2480 | 1407.7219 | 470.2479 | 3 | 33.72 |
| LIC11839 |      |      |                                  |                                                                                                    |                                                            |         |           |          |           |          |   |       |
|          | 7.55 | 9.6  | FEDEINGK                         | ITRAQ4plex@N-term;<br>Deamidated(N)@6;<br>ITRAQ4plex(K)@8                                          |                                                            | -0.0013 | 1239.6213 | 620.8179 | 1239.6227 | 620.8186 | 2 | 28.58 |
|          | 7.55 | 9.6  | KLSVLEIFR                        | ITRAQ4plex@N-term;<br>ITRAQ4plex(K)@1                                                              | missed K-L@1                                               | -0.0255 | 1504.9329 | 502.6516 | 1504.9585 | 502.6601 | 3 | 43.31 |
|          | 7.55 | 9.6  | LDQVK                            | ITRAQ4plex@N-term;<br>ITRAQ4plex(K)@5                                                              | cleaved G-L@N-term                                         | 0.0044  | 889.5521  | 445.7833 | 889.5477  | 445.7811 | 2 | 28.03 |
|          | 7.55 | 9.6  | LSVLEIFR                         | ITRAQ4plex@N-term                                                                                  |                                                            | -0.0037 | 1232.7578 | 617.3862 | 1232.7614 | 617.3880 | 2 | 47.79 |
|          | 7.55 | 9.6  | LSVLEIFRTGYK                     | ITRAQ4plex@N-term;<br>ITRAQ4plex(S)@2;<br>Deamidated(R)@9;<br>ITRAQ4plex(K)@13                     | missed R-T@9                                               | -0.0539 | 1971.1232 | 658.0483 | 1971.1770 | 658.0663 | 3 | 48.13 |
|          | 3.31 | 6.2  | NREEAETKR                        | Carbamyl@N-term;<br>ITRAQ4plex(K)@8                                                                | missed R-E@2; missed K-R@8                                 | -0.0019 | 1318.6692 | 440.5637 | 1318.6711 | 440.5643 | 3 | 34.14 |
|          | 7.55 | 9.6  | QIKNREEAETK                      | ITRAQ4plex@N-term;<br>ITRAQ4plex(K)@3;<br>Deamidated(R)@5;<br>ITRAQ4plex(K)@11                     | cleaved L-Q@N-term; missed K-N@3;<br>missed R-E@5          | 0.0173  | 1778.0073 | 593.6764 | 1777.9899 | 593.6706 | 3 | 27.77 |
|          | 3.31 | 6.2  | RNGQK                            | ITRAQ4plex@N-term;<br>ITRAQ4plex(K)@5                                                              | cleaved S-R@N-term; missed R-N@1                           | 0.0501  | 889.5839  | 445.7992 | 889.5337  | 445.7741 | 2 | 36.74 |
|          | 7.55 | 9.6  | RTGYK                            | ITRAQ4plex@N-term;<br>ITRAQ4plex(K)@5                                                              | cleaved F-R@N-term; missed R-T@1                           | -0.0342 | 911.5090  | 456.7618 | 911.5432  | 456.7789 | 2 | 28.91 |
|          | 7.55 | 9.6  | TVQNFDLAQGEKEFLSR                | ITRAQ4plex@N-term;<br>ITRAQ4plex(K)@13                                                             |                                                            | 0.0057  | 2382.2844 | 795.1021 | 2382.2787 | 795.1002 | 3 | 37.01 |
|          | 3.31 | 6.2  | VLIVDKR                          | ITRAQ4plex@N-term;<br>ITRAQ4plex(K)@6                                                              | missed K-R@6                                               | 0.0013  | 1129.7440 | 565.8793 | 1129.7427 | 565.8786 | 2 | 41.49 |
|          | 7.55 | 9.6  | VVANELQIK                        | ITRAQ4plex@N-term;<br>ITRAQ4plex(K)@9                                                              |                                                            | -0.0043 | 1300.7915 | 651.4030 | 1300.7958 | 651.4052 | 2 | 29.64 |
| LIC11844 |      |      |                                  |                                                                                                    |                                                            |         |           |          |           |          |   |       |
|          | 12   | 27.9 | AEITISEGEKLSRINRSVGEREEAINISEGEK | ITRAQ4plex@N-term;<br>ITRAQ4plex(K)@10;<br>Deamidated(N)@26;<br>ITRAQ4plex(K)@32                   | missed K-L@10; missed R-I@13; missed R-S@16; missed R-E@21 | -0.1654 | 3975.9426 | 994.9929 | 3976.1078 | 995.0342 | 4 | 58.42 |
|          | 12   | 27.9 | ALDEATDPWGIK                     | ITRAQ4plex@N-term;<br>Oxidation(W)@9;<br>ITRAQ4plex(K)@12                                          |                                                            | -0.1201 | 1618.7245 | 810.3695 | 1618.8446 | 810.4296 | 2 | 34.61 |
|          | 12   | 27.9 | ALEIELIAAAK                      | ITRAQ4plex@N-term;<br>ITRAQ4plex(K)@11                                                             |                                                            | -0.0677 | 1428.8119 | 715.4132 | 1428.8795 | 715.4471 | 2 | 56.65 |
|          | 12   | 27.9 | ASYAIENYMLATQQLAQTTLR            | ITRAQ4plex@N-term                                                                                  |                                                            | -0.0046 | 2529.2974 | 844.1064 | 2529.3019 | 844.1079 | 3 | 37.94 |
|          | 12   | 27.9 | DBINSHVVR                        | ITRAQ4plex@N-term                                                                                  |                                                            | 0.0038  | 1197.6262 | 400.2160 | 1197.6224 | 400.2147 | 3 | 26.45 |
|          | 12   | 27.9 | EEAINISEGEK                      | ITRAQ4plex@N-term;<br>Deamidated(N)@5;<br>ITRAQ4plex(K)@11                                         |                                                            | 0.0565  | 1506.8223 | 754.4184 | 1506.7657 | 754.3901 | 2 | 43.23 |
|          | 12   | 27.9 | EILHEMEQVK                       | ITRAQ4plex@N-term;<br>ITRAQ4plex(K)@11                                                             |                                                            | 0.0032  | 1671.8778 | 558.2999 | 1671.8745 | 558.2988 | 3 | 32.26 |

|          |       |      |                                   |                                                                                                      |                                                                                  |         |           |          |           |          |   |       |
|----------|-------|------|-----------------------------------|------------------------------------------------------------------------------------------------------|----------------------------------------------------------------------------------|---------|-----------|----------|-----------|----------|---|-------|
|          | 2     | 6.3  | ISPPK                             | ITRAQ4plex@N-term;<br>ITRAQ4plex(K)@5                                                                | cleaved N-H@N-term                                                               | -0.0100 | 828.5213  | 415.2679 | 828.5313  | 415.2729 | 2 | 54.25 |
|          | 12    | 27.9 | LILDQTFAERDDINSH<br>VVRAL         | ITRAQ4plex@N-term;<br>Deamidated(Q)@5;<br>Oxidation(H)@16                                            | cleaved L-D@C-term; missed R-D@10;<br>missed R-A@19                              | 0.0057  | 2585.3628 | 862.7949 | 2585.3571 | 862.7930 | 3 | 35.96 |
|          | 12    | 27.9 | NEAEGK                            | ITRAQ4plex@N-term;<br>ITRAQ4plex(K)@6                                                                | cleaved I-N@N-term                                                               | 0.0659  | 934.5623  | 468.2884 | 934.4963  | 468.2554 | 2 | 33.49 |
|          | 12    | 27.9 | NISPPKELHEMEEQV<br>K              | ITRAQ4plex@N-term;<br>ITRAQ4plex(K)@6; No<br>ITRAQ4plex(K)@17                                        |                                                                                  | 0.0604  | 2308.2944 | 770.4388 | 2308.2341 | 770.4186 | 3 | 34.04 |
|          | 12    | 27.9 | SVGEREEAINISEGEK                  | ITRAQ4plex@N-term;<br>ITRAQ4plex(K)@16                                                               | missed R-E@5                                                                     | -0.0120 | 2034.0353 | 679.0190 | 2034.0473 | 679.0230 | 3 | 29.28 |
|          | 12    | 27.9 | TISEGEKLSRINRSVG<br>EREEAINISEGEK | ITRAQ4plex@N-term;<br>ITRAQ4plex(K)@7;<br>Deamidated(N)@12;<br>Deamidated(N)@23;<br>ITRAQ4plex(K)@29 | cleaved I-T@N-term; missed K-L@7; missed<br>R-I@10; missed R-S@13; missed R-E@18 | 0.2039  | 3664.1318 | 611.6959 | 3663.9281 | 611.6620 | 6 | 42.05 |
|          | 12    | 27.9 | TTILPAELANIAGVFEG<br>LSK          | ITRAQ4plex@N-term;<br>ITRAQ4plex(K)@20                                                               |                                                                                  | -0.0097 | 2331.3196 | 778.1138 | 2331.3293 | 778.1171 | 3 | 40.84 |
| LIC11845 |       |      |                                   |                                                                                                      |                                                                                  |         |           |          |           |          |   |       |
|          | 12.8  | 24.8 | AASQLAQTMR                        | ITRAQ4plex@N-term                                                                                    | cleaved F-A@N-term                                                               | -0.0309 | 1320.6633 | 661.3389 | 1320.6942 | 661.3544 | 2 | 30.86 |
|          | 12.8  | 24.8 | AQISLSEGDRDAK                     | ITRAQ4plex@N-term;<br>ITRAQ4plex(K)@13                                                               | missed R-D@10                                                                    | -0.0001 | 1676.8936 | 559.9718 | 1676.8937 | 559.9718 | 3 | 28.44 |
|          | 12.8  | 24.8 | EVESIATATAK                       | ITRAQ4plex@N-term;<br>ITRAQ4plex(K)@11                                                               |                                                                                  | -0.0043 | 1406.7819 | 704.3982 | 1406.7860 | 704.4003 | 2 | 27.86 |
|          | 12.8  | 24.8 | GIELIAQSIHSQGGK                   | ITRAQ4plex@N-term;<br>ITRAQ4plex(K)@15                                                               |                                                                                  | -0.0011 | 1825.0291 | 609.3503 | 1825.0301 | 609.3507 | 3 | 32.45 |
|          | 12.8  | 24.8 | ILEVLDQAAEPWGIK                   | ITRAQ4plex@N-term;<br>ITRAQ4plex(K)@15                                                               |                                                                                  | -0.0118 | 1969.1010 | 657.3743 | 1969.1128 | 657.3782 | 3 | 37.57 |
|          | 12.8  | 24.8 | INEAEGVAK                         | ITRAQ4plex@N-term;<br>ITRAQ4plex(K)@9                                                                |                                                                                  | 0.0155  | 1217.7015 | 609.8580 | 1217.6859 | 609.8502 | 2 | 26.92 |
|          | 12.8  | 24.8 | IVSAQDCIVVEK                      | ITRAQ4plex@N-term;<br>Methylthio(C)@7;<br>ITRAQ4plex(K)@12                                           |                                                                                  | 0.0606  | 1636.9377 | 546.6532 | 1636.8772 | 546.6330 | 3 | 55.26 |
|          | 12.8  | 24.8 | KAQISLSEGDR                       | ITRAQ4plex@N-term;<br>ITRAQ4plex(K)@1                                                                | missed K-A@1                                                                     | 0.0286  | 1490.8583 | 497.9600 | 1490.8296 | 497.9505 | 3 | 30.01 |
|          | 12.8  | 24.8 | KTEIVLPLNLANFR                    | ITRAQ4plex@N-term;<br>ITRAQ4plex(K)@1                                                                | missed K-T@1                                                                     | -0.0340 | 1915.1158 | 639.3792 | 1915.1499 | 639.3906 | 3 | 36.16 |
|          | 12.8  | 24.8 | RINEAEGVAK                        | ITRAQ4plex@N-term;<br>ITRAQ4plex(K)@10                                                               | missed R-I@1                                                                     | -0.0474 | 1373.7396 | 458.9205 | 1373.7870 | 458.9363 | 3 | 28.49 |
|          | 12.8  | 24.8 | SILEAMEK                          | ITRAQ4plex@N-term;<br>ITRAQ4plex(K)@8                                                                |                                                                                  | 0.0158  | 1207.6885 | 604.8515 | 1207.6726 | 604.8436 | 2 | 37.34 |
|          | 6     | 12.9 | SLGFK                             | ITRAQ4plex@N-term;<br>ITRAQ4plex(K)@5                                                                |                                                                                  | 0.0017  | 838.5173  | 420.2659 | 838.5156  | 420.2651 | 2 | 38.55 |
|          | 12.8  | 24.8 | TEIVLPLNLANFR                     | ITRAQ4plex@N-term                                                                                    |                                                                                  | -0.0062 | 1642.9467 | 822.4806 | 1642.9528 | 822.4837 | 2 | 36.68 |
| LIC11848 |       |      |                                   |                                                                                                      |                                                                                  |         |           |          |           |          |   |       |
|          | 18.8  | 40.2 | DNYPEYGRPETPAEK                   | ITRAQ4plex@N-term;<br>ITRAQ4plex(K)@15                                                               |                                                                                  | -0.0201 | 2052.9795 | 685.3338 | 2052.9996 | 685.3405 | 3 | 28.34 |
|          | 18.8  | 40.2 | EVYDFIRDEER                       | ITRAQ4plex@N-term                                                                                    | cleaved V-E@N-term; missed R-D@7                                                 | -0.0032 | 1613.7775 | 538.9331 | 1613.7807 | 538.9342 | 3 | 32.93 |
|          | 12.33 | 18.8 | HLDQFDR                           | ITRAQ4plex@N-term                                                                                    |                                                                                  | -0.0006 | 1073.5371 | 537.7758 | 1073.5376 | 537.7761 | 2 | 38.51 |
|          | 18.8  | 40.2 | HTVLMK                            | ITRAQ4plex@N-term;<br>ITRAQ4plex(K)@6                                                                |                                                                                  | -0.0214 | 1015.5878 | 508.8012 | 1015.6092 | 508.8119 | 2 | 29.53 |
|          | 18.8  | 40.2 | IFDYNDQLGNENYKE<br>NVDALK         | ITRAQ4plex@N-term;<br>Deamidated(Q)@7;<br>ITRAQ4plex(K)@14;<br>ITRAQ4plex(K)@21                      |                                                                                  | -0.0173 | 2934.4441 | 979.1553 | 2934.4613 | 979.1610 | 3 | 33.23 |
|          | 12.33 | 18.8 | IFELNOR                           | ITRAQ4plex@N-term                                                                                    |                                                                                  | -0.0103 | 1062.5841 | 532.2993 | 1062.5944 | 532.3045 | 2 | 41.70 |
|          | 18.8  | 40.2 | IISEVMDR                          | ITRAQ4plex@N-term                                                                                    |                                                                                  | -0.0191 | 1105.5732 | 553.7939 | 1105.5923 | 553.8034 | 2 | 30.94 |
|          | 18.8  | 40.2 | IYKNMVLLEDK                       | ITRAQ4plex@N-term;<br>ITRAQ4plex(K)@3;<br>Deamidated(N)@4;<br>ITRAQ4plex(K)@11                       | missed K-N@3                                                                     | 0.0031  | 1798.9896 | 600.6705 | 1798.9864 | 600.6694 | 3 | 31.26 |
|          | 18.8  | 40.2 | LAGVENTKTHPIR                     | ITRAQ4plex@N-term;<br>ITRAQ4plex(K)@8                                                                | cleaved I-L@N-term; missed K-T@8                                                 | -0.0271 | 1722.9713 | 575.3311 | 1722.9984 | 575.3401 | 3 | 36.79 |
|          | 18.8  | 40.2 | NVQALAK                           | ITRAQ4plex@N-term;<br>ITRAQ4plex(K)@8                                                                |                                                                                  | -0.0071 | 1087.6522 | 544.8334 | 1087.6593 | 544.8369 | 2 | 25.74 |
|          | 12.33 | 18.8 | PEPRTEPPR                         | ITRAQ4plex@N-term;<br>ITRAQ4plex(T)@5                                                                | cleaved D-P@N-term; missed R-T@4                                                 | 0.0424  | 1365.8032 | 683.9089 | 1365.7608 | 683.8877 | 2 | 50.09 |
|          | 18.8  | 40.2 | RTEPP                             | ITRAQ4plex@N-term                                                                                    | cleaved P-R@N-term; cleaved P-R@C-<br>term; missed R-T@1                         | 0.0298  | 742.4394  | 743.4467 | 742.4095  | 743.4168 | 1 | 53.48 |
|          | 18.8  | 40.2 | SQPSSAQLGQSILETE<br>R             | ITRAQ4plex@N-term                                                                                    |                                                                                  | -0.0771 | 1973.9369 | 987.9757 | 1974.0140 | 988.0143 | 2 | 30.51 |
|          | 12.33 | 18.8 | THPIRNSFK                         | CarbamyI@N-term;<br>Deamidated(N)@6;<br>ITRAQ4plex(K)@9                                              | missed R-N@5                                                                     | -0.0070 | 1286.6782 | 429.9000 | 1286.6853 | 429.9024 | 3 | 37.91 |
|          | 18.8  | 40.2 | VEVYDFIRDEER                      | ITRAQ4plex@N-term                                                                                    | missed R-D@8                                                                     | -0.0003 | 1712.8489 | 571.9569 | 1712.8491 | 571.9570 | 3 | 40.66 |



|          |       |      |                                    |                                                                                                                      |                                                         |         |           |           |           |           |   |       |
|----------|-------|------|------------------------------------|----------------------------------------------------------------------------------------------------------------------|---------------------------------------------------------|---------|-----------|-----------|-----------|-----------|---|-------|
|          | 18.8  | 40.2 | YILAGVENTK                         | ITRAQ4plex@N-term;<br>ITRAQ4plex(K)@10                                                                               |                                                         | -0.0234 | 1394.7780 | 698.3962  | 1394.8013 | 698.4079  | 2 | 29.90 |
|          | 18.8  | 40.2 | YMEIYFEGQNSNDPE<br>PR              | ITRAQ4plex@N-term;<br>Deamidated(N)@10                                                                               |                                                         | 0.0056  | 2232.9810 | 1117.4980 | 2232.9755 | 1117.4951 | 2 | 33.11 |
|          | 12.33 | 18.8 | YPEYGRPETPAEK                      | ITRAQ4plex@N-term;<br>ITRAQ4plex(K)@13                                                                               | cleaved N-Y@N-term                                      | -0.0018 | 1823.9280 | 608.9833  | 1823.9297 | 608.9839  | 3 | 38.48 |
| LIC11852 |       |      |                                    |                                                                                                                      |                                                         |         |           |           |           |           |   |       |
|          | 2     | 5.5  | DMGASISPFNAWQIL<br>QGVETLPLR       | ITRAQ4plex@N-term                                                                                                    |                                                         | 0.0130  | 2786.4678 | 929.8298  | 2786.4547 | 929.8255  | 3 | 43.19 |
|          | 2     | 5.5  | TRAF                               | ITRAQ4plex@N-term                                                                                                    | cleaved F-Y@C-term; missed R-A@2                        | 0.0277  | 637.3947  | 638.4019  | 637.3669  | 638.3742  | 1 | 56.31 |
| LIC11861 |       |      |                                    |                                                                                                                      |                                                         |         |           |           |           |           |   |       |
|          | 2     | 8.2  | DLLSGHYLQYNIGFK                    | ITRAQ4plex@N-term;<br>ITRAQ4plex(K)@15                                                                               |                                                         | -0.0110 | 2055.0923 | 686.0380  | 2055.1033 | 686.0417  | 3 | 37.26 |
|          | 2     | 8.2  | RQKNEILNQSNSDGK                    | ITRAQ4plex@N-term;<br>ITRAQ4plex(K)@3;<br>Deamidated(N)@11;<br>ITRAQ4plex(K)@15                                      | missed R-Q@1; missed K-N@3                              | 0.0733  | 2163.2341 | 722.0853  | 2163.1609 | 722.0609  | 3 | 37.26 |
| LIC11885 |       |      |                                    |                                                                                                                      |                                                         |         |           |           |           |           |   |       |
|          | 18.43 | 24.5 | AISEWAASVSK                        | ITRAQ4plex@N-term;<br>ITRAQ4plex(K)@11                                                                               |                                                         | -0.0090 | 1435.7825 | 718.8985  | 1435.7915 | 718.9030  | 2 | 31.44 |
|          | 18.43 | 24.5 | ASDGESLGSSLLSK                     | ITRAQ4plex@N-term;<br>ITRAQ4plex(K)@14                                                                               |                                                         | -0.0386 | 1637.8330 | 819.9238  | 1637.8716 | 819.9431  | 2 | 26.52 |
|          | 18.43 | 24.5 | ASVSK                              | No ITRAQ4plex@N-term;<br>ITRAQ4plex(K)@5                                                                             | cleaved A-A@N-term                                      | 0.0162  | 634.3934  | 635.4007  | 634.3772  | 635.3845  | 1 | 54.88 |
|          | 18.43 | 24.5 | DEATK                              | ITRAQ4plex@N-term;<br>ITRAQ4plex(K)@5                                                                                | cleaved A-D@N-term                                      | 0.0169  | 850.4810  | 426.2477  | 850.4640  | 426.2393  | 2 | 29.84 |
|          | 18.43 | 24.5 | FKDDLTEFTATK                       | ITRAQ4plex@N-term;<br>ITRAQ4plex(K)@2;<br>ITRAQ4plex(K)@12                                                           |                                                         | 0.0083  | 1847.0125 | 616.6781  | 1847.0042 | 616.6753  | 3 | 33.45 |
|          | 18.43 | 24.5 | FPTRLIAALAVISFIS<br>CGSSGSTR       | ITRAQ4plex@N-term;<br>Deamidated(R)@5;<br>Methylthio(C)@19                                                           | missed R-L@5                                            | -0.0158 | 2832.4478 | 945.1566  | 2832.4636 | 945.1618  | 3 | 39.93 |
|          | 18.43 | 24.5 | FTGLNADEATK                        | ITRAQ4plex@N-term;<br>ITRAQ4plex(K)@11                                                                               |                                                         | -0.0250 | 1453.7407 | 727.8776  | 1453.7656 | 727.8901  | 2 | 28.60 |
|          | 18.43 | 24.5 | GFSFLATK                           | ITRAQ4plex@N-term;<br>ITRAQ4plex(K)@8                                                                                |                                                         | 0.0147  | 1157.6836 | 579.8491  | 1157.6688 | 579.8417  | 2 | 46.37 |
|          | 18.43 | 24.5 | GGAPVFPATPGNFG<br>AEIIK            | ITRAQ4plex@N-term;<br>ITRAQ4plex(K)@20                                                                               | cleaved V-G@N-term                                      | -4.9957 | 2254.2185 | 752.4135  | 2259.2143 | 754.0787  | 3 | 36.56 |
|          | 18.43 | 24.5 | GVVTLEFKPLK                        | ITRAQ4plex@N-term;<br>ITRAQ4plex(K)@8;<br>ITRAQ4plex(K)@11                                                           |                                                         | 0.0066  | 1662.0510 | 555.0243  | 1662.0445 | 555.0221  | 3 | 34.95 |
|          | 18.43 | 24.5 | IDTQPLMK                           | ITRAQ4plex@N-term;<br>Deamidated(Q)@4;<br>ITRAQ4plex(K)@8                                                            |                                                         | -0.0148 | 1233.6735 | 617.8440  | 1233.6882 | 617.8514  | 2 | 28.85 |
|          | 18.43 | 24.5 | IGEEISNK                           | ITRAQ4plex@N-term;<br>ITRAQ4plex(K)@8                                                                                | cleaved V-I@N-term                                      | -0.0103 | 1176.6490 | 589.3318  | 1176.6594 | 589.3370  | 2 | 27.68 |
|          | 18.43 | 24.5 | IKILAEALQAEVL                      | ITRAQ4plex@N-term;<br>ITRAQ4plex(K)@2;<br>Deamidated(Q)@9                                                            | cleaved L-I@N-term; cleaved L-V@C-term;<br>missed K-I@2 | -0.0760 | 1698.9615 | 850.4880  | 1699.0375 | 850.5260  | 2 | 34.69 |
|          | 18.43 | 24.5 | ISTAVDNLADVGNPR                    | ITRAQ4plex@N-term                                                                                                    |                                                         | 0.0010  | 1797.9717 | 899.9931  | 1797.9707 | 899.9926  | 2 | 35.88 |
|          | 15.94 | 20.6 | IVDSGTADGR                         | ITRAQ4plex@N-term;<br>Carboxy(D)@3;<br>Deamidated(R)@10                                                              |                                                         | 0.0260  | 1178.5797 | 590.2971  | 1178.5537 | 590.2841  | 2 | 43.88 |
|          | 18.43 | 24.5 | SYDIIDEAEGK                        | ITRAQ4plex@N-term;<br>ITRAQ4plex(K)@11                                                                               |                                                         | 0.0058  | 1526.7766 | 764.3956  | 1526.7708 | 764.3927  | 2 | 31.09 |
|          | 18.43 | 24.5 | TIYNAAATGTYK                       | ITRAQ4plex@N-term;<br>ITRAQ4plex(Y)@11;<br>ITRAQ4plex(K)@12                                                          |                                                         | -0.0094 | 1734.9424 | 579.3214  | 1734.9518 | 579.3245  | 3 | 28.17 |
|          | 18.43 | 24.5 | VAVLVLGK                           | ITRAQ4plex@N-term;<br>ITRAQ4plex(K)@8                                                                                |                                                         | 0.0131  | 1085.7548 | 543.8846  | 1085.7416 | 543.8781  | 2 | 49.07 |
|          | 15.94 | 20.6 | VIDPSLTAK                          | ITRAQ4plex@N-term;<br>ITRAQ4plex(K)@9                                                                                |                                                         | -0.0089 | 1230.7339 | 616.3742  | 1230.7427 | 616.3786  | 2 | 39.66 |
|          | 18.43 | 24.5 | VTVIGEAPIYNGDK                     | ITRAQ4plex@N-term;<br>Oxidation(D)@13;<br>ITRAQ4plex(K)@14                                                           |                                                         | 0.0368  | 1779.0027 | 594.0082  | 1778.9658 | 593.9959  | 3 | 51.18 |
|          | 18.43 | 24.5 | VVLLWGDGK                          | ITRAQ4plex@N-term;<br>ITRAQ4plex(K)@9                                                                                |                                                         | -0.0077 | 1273.7561 | 637.8853  | 1273.7638 | 637.8892  | 2 | 40.59 |
| LIC11890 |       |      |                                    |                                                                                                                      |                                                         |         |           |           |           |           |   |       |
|          | 35.69 | 58.4 | ADGSLTLSTADEFAND<br>AIGTLDDALMKINK | ITRAQ4plex@N-term;<br>Phospho(T)@10;<br>Dehydrated(D)@16;<br>Phospho(T)@20;<br>ITRAQ4plex(K)@27;<br>ITRAQ4plex(K)@30 | missed K-I@27                                           | -0.1442 | 3681.6538 | 921.4207  | 3681.7979 | 921.4568  | 4 | 44.69 |
|          | 35.69 | 58.4 | AIQSSNGIYSAEDR                     | ITRAQ4plex@N-term;<br>Deamidated(N)@6                                                                                | cleaved L-A@N-term                                      | -0.0278 | 1654.7643 | 828.3894  | 1654.7920 | 828.4033  | 2 | 28.00 |

|       |      |                                |                                                                                                             |                                                     |         |           |           |           |           |   |       |
|-------|------|--------------------------------|-------------------------------------------------------------------------------------------------------------|-----------------------------------------------------|---------|-----------|-----------|-----------|-----------|---|-------|
| 35.69 | 58.4 | ALLQGDFAR                      | ITRAQ4plex@N-term                                                                                           | cleaved M-A@N-term                                  | -0.0079 | 1133.6237 | 567.8191  | 1133.6315 | 567.8230  | 2 | 30.05 |
| 35.69 | 58.4 | ANLGAYFNR                      | ITRAQ4plex@N-term                                                                                           |                                                     | -0.0748 | 1168.5363 | 585.2754  | 1168.6111 | 585.3128  | 2 | 30.11 |
| 35.69 | 58.4 | ARGSRTSSMWFHIGPNQHQR           | Formyl@N-term;<br>Deamidated(R)@2;<br>Oxidation(R)@5;<br>ITRAQ4plex(S)@8                                    | cleaved F-A@N-term; missed R-G@2;<br>missed R-T@5   | -0.0644 | 2541.1521 | 848.0580  | 2541.2166 | 848.0795  | 3 | 33.17 |
| 35.69 | 58.4 | ATMTAK                         | ITRAQ4plex@N-term;<br>ITRAQ4plex(K)@6                                                                       | cleaved I-A@N-term                                  | -0.0058 | 909.5140  | 455.7643  | 909.5197  | 455.7671  | 2 | 27.80 |
| 35.69 | 58.4 | AYENIQASESR                    | ITRAQ4plex@N-term;<br>ITRAQ4plex(Y)@2                                                                       | cleaved V-A@N-term                                  | -0.0060 | 1554.7822 | 519.2680  | 1554.7882 | 519.2700  | 3 | 26.33 |
| 35.69 | 58.4 | DTDMAEETVAFK                   | ITRAQ4plex@N-term;<br>ITRAQ4plex(K)@13                                                                      |                                                     | 0.0228  | 1744.8661 | 873.4403  | 1744.8433 | 873.4289  | 2 | 58.87 |
| 35.69 | 58.4 | ERVVIATMTAK                    | ITRAQ4plex@N-term;<br>Carboxy(E)@1;<br>ITRAQ4plex(Y)@4;<br>ITRAQ4plex(K)@11                                 | missed R-V@2                                        | -0.1115 | 1757.8596 | 879.9371  | 1757.9711 | 879.9928  | 2 | 32.14 |
| 35.69 | 58.4 | FHIGPNQHQRERVVIATMTAK          | ITRAQ4plex@N-term;<br>Deamidated(N)@6;<br>ITRAQ4plex(K)@21                                                  | cleaved W-F@N-term; missed R-E@10;<br>missed R-V@12 | 0.0292  | 2785.4980 | 929.5067  | 2785.4690 | 929.4969  | 3 | 53.88 |
| 35.69 | 58.4 | FQNNEVAK                       | ITRAQ4plex@N-term;<br>ITRAQ4plex(K)@8                                                                       |                                                     | 0.0051  | 1236.6758 | 619.3452  | 1236.6706 | 619.3426  | 2 | 26.36 |
| 35.69 | 58.4 | GLMVAYENIQASESR                | ITRAQ4plex@N-term                                                                                           |                                                     | 0.0043  | 1810.9049 | 906.4597  | 1810.9005 | 906.4575  | 2 | 59.15 |
| 27.86 | 44.8 | HNLAAINSHR                     | Carbamy@N-term                                                                                              | cleaved N-H@N-term                                  | 0.0051  | 1174.6006 | 588.3076  | 1174.5956 | 588.3051  | 2 | 36.06 |
| 35.69 | 58.4 | IASQAEFNKMLLQ                  | ITRAQ4plex@N-term;<br>Deamidated(Q)@4;<br>ITRAQ4plex(K)@9;<br>Oxidation(M)@10                               | cleaved Q-G@C-term; missed K-M@9                    | -0.1070 | 1867.8887 | 934.9516  | 1867.9957 | 935.0051  | 2 | 31.62 |
| 35.69 | 58.4 | IKADGSLTSTAEFANDAIGTLDDALMK    | ITRAQ4plex@N-term;<br>ITRAQ4plex(K)@2;<br>Phospho(S)@6; Phospho(T)@9;<br>Phospho(S)@11;<br>ITRAQ4plex(K)@29 | cleaved L-I@N-term; missed K-A@2                    | -0.0915 | 3665.6404 | 917.4174  | 3665.7319 | 917.4403  | 4 | 44.40 |
| 35.69 | 58.4 | IRDTDMAEETVAFK                 | ITRAQ4plex@N-term;<br>ITRAQ4plex(K)@15                                                                      | missed R-D@2                                        | -0.0223 | 2014.0061 | 672.3427  | 2014.0285 | 672.3501  | 3 | 31.84 |
| 27.86 | 44.8 | KADGSLTSTAEFANDAIGTLDDALMK     | ITRAQ4plex@N-term; No<br>ITRAQ4plex(K)@1;<br>Deamidated(N)@16;<br>ITRAQ4plex(K)@28                          | cleaved I-K@N-term; missed K-A@1                    | -0.0585 | 3169.5723 | 1057.5310 | 3169.6308 | 1057.5509 | 3 | 54.56 |
| 27.86 | 44.8 | LAAINSHR                       | ITRAQ4plex@N-term                                                                                           | cleaved N-L@N-term                                  | 0.0008  | 1024.5908 | 513.3027  | 1024.5900 | 513.3023  | 2 | 36.71 |
| 27.86 | 44.8 | LAQANVRPQSVLQLLR               | Carbamy@N-term                                                                                              | cleaved M-L@N-term                                  | 0.0037  | 1848.0731 | 925.0438  | 1848.0694 | 925.0420  | 2 | 48.63 |
| 35.69 | 58.4 | LQETNDIIQR                     | ITRAQ4plex@N-term;<br>Deamidated(N)@5                                                                       | cleaved Y-L@N-term                                  | -0.0335 | 1373.6937 | 458.9052  | 1373.7272 | 458.9164  | 3 | 24.48 |
| 35.69 | 58.4 | MALLQGDFAR                     | ITRAQ4plex@N-term                                                                                           |                                                     | -0.0432 | 1264.6288 | 633.3217  | 1264.6720 | 633.3433  | 2 | 32.11 |
| 35.69 | 58.4 | MIINHNAAINSHR                  | ITRAQ4plex@N-term;<br>Deamidated(N)@11                                                                      |                                                     | -0.0054 | 1747.9220 | 583.6479  | 1747.9274 | 583.6497  | 3 | 32.30 |
| 35.69 | 58.4 | NLIKADGSLTSTAEFANDAIGTLDDALMK  | ITRAQ4plex@N-term;<br>Deamidated(N)@1;<br>ITRAQ4plex(K)@4;<br>Methyl(D)@20;<br>ITRAQ4plex(K)@31             | cleaved L-N@N-term; missed K-A@4                    | -0.3169 | 3667.6426 | 917.9179  | 3667.9596 | 917.9972  | 4 | 46.01 |
| 35.69 | 58.4 | NMETLSSGMR                     | ITRAQ4plex@N-term                                                                                           |                                                     | -0.0148 | 1268.5828 | 635.2966  | 1268.5975 | 635.3060  | 2 | 28.16 |
| 35.69 | 58.4 | NTEDGMSLIQTTEGYLQETNDIIQR      | ITRAQ4plex@N-term                                                                                           |                                                     | -0.0240 | 3012.4229 | 1005.1480 | 3012.4468 | 1005.1562 | 3 | 39.82 |
| 35.69 | 58.4 | PQSVLQLLR                      | No ITRAQ4plex@N-term                                                                                        | cleaved R-P@N-term                                  | 0.0104  | 1052.6447 | 527.3296  | 1052.6342 | 527.3244  | 2 | 36.71 |
| 35.69 | 58.4 | QRERVVIATMTAK                  | ITRAQ4plex@N-term;<br>Deamidated(Q)@1;<br>Deamidated(R)@2;<br>Deamidated(R)@4;<br>ITRAQ4plex(K)@13          | cleaved H-Q@N-term; missed R-E@2;<br>missed R-V@4   | -0.0699 | 1856.9210 | 929.4678  | 1856.9910 | 929.5028  | 2 | 36.14 |
| 35.69 | 58.4 | QSVLQLLR                       | Gln->pyro-Glu@N-term                                                                                        | cleaved P-Q@N-term                                  | 0.0192  | 938.5741  | 470.2943  | 938.5549  | 470.2847  | 2 | 32.16 |
| 27.86 | 44.8 | RGSRTSSMWFHIGPNQHQR            | ITRAQ4plex@N-term;<br>Oxidation(R)@4                                                                        | cleaved A-R@N-term; missed R-G@1;<br>missed R-T@4   | -1.1340 | 2440.0667 | 814.3628  | 2441.2005 | 814.7408  | 3 | 46.74 |
| 27.86 | 44.8 | SLNLIK                         | ITRAQ4plex@N-term;<br>ITRAQ4plex(K)@6                                                                       |                                                     | -0.0068 | 974.6301  | 488.3223  | 974.6368  | 488.3257  | 2 | 41.36 |
| 35.69 | 58.4 | SLNLKADGSLTSTAEFANDAIGTLDDALMK | Methylthio@N-term;<br>Deamidated(N)@3; No<br>ITRAQ4plex(K)@6;<br>Deamidated(N)@21;<br>ITRAQ4plex(K)@33      | missed K-A@6                                        | -0.1021 | 3612.7256 | 904.1887  | 3612.8276 | 904.2142  | 4 | 44.96 |
| 35.69 | 58.4 | SVLQLLR                        | ITRAQ4plex@N-term                                                                                           | cleaved Q-S@N-term                                  | 0.0043  | 971.6293  | 486.8219  | 971.6250  | 486.8198  | 2 | 32.97 |
| 35.69 | 58.4 | TSSMWFHIGPNQHQRER              | ITRAQ4plex@N-term;<br>Deamidated(Q)@14;<br>Deamidated(R)@15;<br>Deamidated(R)@17                            | missed R-E@15                                       | -0.0263 | 2257.0193 | 753.3470  | 2257.0456 | 753.3558  | 3 | 36.25 |

|              |       |      |                                    |                                                                                 |                                                     |         |           |           |           |           |   |       |
|--------------|-------|------|------------------------------------|---------------------------------------------------------------------------------|-----------------------------------------------------|---------|-----------|-----------|-----------|-----------|---|-------|
|              | 35.69 | 58.4 | TSSMWFHIGPNQHQR<br>ERV             | ITRAQ4plex@N-term;<br>Oxidation(R)@15;<br>Oxidation(R)@17                       | cleaved V-Y@C-term; missed R-E@15;<br>missed R-V@17 | -0.0808 | 2385.0710 | 796.0309  | 2385.1518 | 796.0579  | 3 | 36.08 |
|              | 35.69 | 58.4 | VAYENIQASESR                       | ITRAQ4plex@N-term                                                               | cleaved M-V@N-term                                  | -0.0049 | 1509.7496 | 755.8821  | 1509.7545 | 755.8845  | 2 | 27.86 |
|              | 35.69 | 58.4 | VLAIQSSNGIYSAEDR                   | ITRAQ4plex@N-term;<br>Deamidated(N)@8                                           |                                                     | -0.0164 | 1866.9281 | 934.4713  | 1866.9445 | 934.4795  | 2 | 31.40 |
|              | 35.69 | 58.4 | VRPQSVLQLLR                        | ITRAQ4plex@N-term                                                               | cleaved N-V@N-term                                  | -0.0060 | 1451.8999 | 484.9739  | 1451.9058 | 484.9759  | 3 | 34.37 |
|              | 35.69 | 58.4 | VYIATMTAK                          | ITRAQ4plex@N-term;<br>ITRAQ4plex(K)@9                                           |                                                     | -0.0094 | 1284.7262 | 643.3704  | 1284.7355 | 643.3750  | 2 | 33.44 |
| LIC11898     |       |      |                                    |                                                                                 |                                                     |         |           |           |           |           |   |       |
|              | 2.47  | 2.8  | RGEGPTLMEISTYR                     | ITRAQ4plex@N-term                                                               | missed R-G@1                                        | 0.0370  | 1752.9321 | 585.3180  | 1752.8951 | 585.3056  | 3 | 48.42 |
| LIC11913     |       |      |                                    |                                                                                 |                                                     |         |           |           |           |           |   |       |
|              | 2.77  | 4.6  | ASLPSEEK                           | ITRAQ4plex@N-term;<br>ITRAQ4plex(K)@8                                           |                                                     | 0.0012  | 1147.6340 | 574.8243  | 1147.6328 | 574.8237  | 2 | 26.17 |
|              | 2.77  | 4.6  | EGISVEVLDLR                        | Delta:H(2)C(2)@N-term;<br>Methyl(I)@3                                           |                                                     | -0.0064 | 1268.6913 | 635.3529  | 1268.6976 | 635.3561  | 2 | 43.48 |
|              | 2.77  | 4.6  | NSFDDLDAPVER                       | ITRAQ4plex@N-term;<br>Oxidation(D)@7; Oxidation(P)@9                            |                                                     | 0.0274  | 1552.7402 | 777.3774  | 1552.7127 | 777.3636  | 2 | 37.48 |
|              | 2.77  | 4.6  | SIRPLDEEAYTSIR                     | ITRAQ4plex@N-term                                                               |                                                     | -0.0147 | 1906.0134 | 636.3451  | 1906.0282 | 636.3500  | 3 | 32.88 |
|              | 2.77  | 4.6  | VPMP                               | ITRAQ4plex@N-term                                                               | cleaved D-V@N-term; cleaved P-Y@C-term              | 0.0282  | 586.3553  | 587.3625  | 586.3271  | 587.3343  | 1 | 53.86 |
|              | 2.77  | 4.6  | VSQGMLSK                           | ITRAQ4plex@N-term;<br>ITRAQ4plex(K)@8                                           |                                                     | 0.0058  | 1136.6526 | 569.3336  | 1136.6467 | 569.3306  | 2 | 27.86 |
| LIC1_SPN3184 |       |      |                                    |                                                                                 |                                                     |         |           |           |           |           |   |       |
|              | 4     | 10.9 | ASDASSQNTESNGLT<br>THEER           | ITRAQ4plex@N-term;<br>Deamidated(N)@8;<br>Deamidated(N)@12                      |                                                     | -0.0185 | 2278.9722 | 760.6647  | 2278.9907 | 760.6709  | 3 | 24.88 |
|              | 4     | 10.9 | DYTEYPLR                           | ITRAQ4plex@N-term;<br>Oxidation(D)@1                                            |                                                     | 0.0378  | 1215.6272 | 608.8209  | 1215.5894 | 608.8020  | 2 | 31.18 |
|              | 5.78  | 12.9 | EDHILEHGR                          | Carbamyl@N-term                                                                 |                                                     | 0.0053  | 1147.5424 | 574.7784  | 1147.5370 | 574.7758  | 2 | 37.90 |
|              | 4     | 10.9 | ESSITQGQAPTSTQNA<br>TSQSSTTSGANTVK | ITRAQ4plex@N-term;<br>ITRAQ4plex(K)@30                                          |                                                     | -0.0378 | 3256.5522 | 1086.5250 | 3256.5899 | 1086.5372 | 3 | 26.85 |
|              | 5.78  | 12.9 | FLSSFR                             | ITRAQ4plex@N-term                                                               |                                                     | 0.0145  | 899.5132  | 450.7639  | 899.4987  | 450.7566  | 2 | 43.10 |
|              | 4     | 10.9 | GVDLGEVIGSGPGGR                    | ITRAQ4plex@N-term;<br>Deamidated(R)@15                                          |                                                     | 0.0527  | 1513.8385 | 505.6201  | 1513.7858 | 505.6025  | 3 | 43.14 |
|              | 5.78  | 12.9 | QDRKLEITGMR                        | ITRAQ4plex@N-term;<br>Deamidated(R)@3;<br>ITRAQ4plex(K)@4                       | missed R-K@3; missed K-L@4                          | -0.1073 | 1634.7943 | 545.9387  | 1634.9018 | 545.9745  | 3 | 48.16 |
|              | 4     | 10.9 | TOIPFDESDSPIRSAR<br>GGR            | No ITRAQ4plex@N-term                                                            | missed R-S@13; missed R-G@16                        | -0.1366 | 2087.8982 | 696.9733  | 2088.0348 | 697.0189  | 3 | 59.89 |
| LIC11928     |       |      |                                    |                                                                                 |                                                     |         |           |           |           |           |   |       |
|              | 6.1   | 8.1  | AGADGLRI                           | ITRAQ4plex@N-term                                                               | cleaved I-G@C-term; missed R-I@7                    | 0.2467  | 915.7727  | 458.8936  | 915.5260  | 458.7703  | 2 | 53.25 |
|              | 10.07 | 11.6 | AQAENLIRAGADGLR                    | ITRAQ4plex@N-term;<br>Oxidation(R)@8                                            | missed R-A@8                                        | -0.0166 | 1713.9078 | 857.9612  | 1713.9244 | 857.9695  | 2 | 58.56 |
|              | 10.07 | 11.6 | DFLVLPGFIDFHPSEV<br>ELETR          | ITRAQ4plex@N-term;<br>ITRAQ4plex(S)@14                                          |                                                     | 0.0174  | 2747.4587 | 687.8719  | 2747.4414 | 687.8676  | 4 | 40.77 |
|              | 10.07 | 11.6 | DIVAGNVVTR                         | ITRAQ4plex@N-term                                                               | cleaved L-D@N-term                                  | 0.0040  | 1186.6831 | 594.3488  | 1186.6792 | 594.3469  | 2 | 28.05 |
|              | 10.07 | 11.6 | EFKNDLIVAGNVVTR                    | Glu->pyro-Glu@N-term;<br>ITRAQ4plex(K)@3;<br>Deamidated(N)@4;<br>Oxidation(D)@6 | missed K-N@3                                        | -0.0042 | 1816.9763 | 909.4954  | 1816.9805 | 909.4975  | 2 | 36.22 |
|              | 10.07 | 11.6 | GFTGIPVTEGTR                       | ITRAQ4plex@N-term                                                               |                                                     | 0.0105  | 1492.7749 | 747.3947  | 1492.7644 | 747.3895  | 2 | 30.13 |
|              | 10.07 | 11.6 | GMASIEAMK                          | ITRAQ4plex@N-term;<br>ITRAQ4plex(K)@9                                           |                                                     | -1.9783 | 1222.6667 | 612.3406  | 1224.6450 | 613.3298  | 2 | 29.52 |
|              | 10.07 | 11.6 | GSILNFIPYLSQGLR                    | ITRAQ4plex@N-term                                                               |                                                     | -0.0009 | 1821.0262 | 911.5204  | 1821.0271 | 911.5208  | 2 | 39.26 |
|              | 6.1   | 8.1  | KGFTGIPVTEGTR                      | ITRAQ4plex@N-term;<br>ITRAQ4plex(K)@1                                           | missed K-G@1                                        | -0.0093 | 1764.9521 | 589.3246  | 1764.9614 | 589.3277  | 3 | 43.58 |
|              | 10.07 | 11.6 | LVLSVRSDLK                         | ITRAQ4plex@N-term;<br>Deamidated(R)@7;<br>ITRAQ4plex(K)@11                      | missed R-S@7                                        | -0.0411 | 1504.8657 | 753.4401  | 1504.9068 | 753.4607  | 2 | 38.93 |
|              | 6.1   | 8.1  | RFENGFITDPVILGPK                   | ITRAQ4plex@N-term;<br>Deamidated(N)@4;<br>ITRAQ4plex(K)@16                      | missed R-F@1                                        | 0.0000  | 2091.1606 | 698.0609  | 2091.1608 | 698.0609  | 3 | 54.10 |
|              | 10.07 | 11.6 | VAQGVSGSVVDR                       | No ITRAQ4plex@N-term                                                            |                                                     | 0.0051  | 1172.6201 | 587.3173  | 1172.6150 | 587.3148  | 2 | 26.65 |
|              | 10.07 | 11.6 | YFNEGQK                            | ITRAQ4plex@N-term;<br>Deamidated(N)@3;<br>ITRAQ4plex(K)@7                       |                                                     | 0.0718  | 1173.6627 | 587.8386  | 1173.5910 | 587.8028  | 2 | 24.44 |
| LIC11929     |       |      |                                    |                                                                                 |                                                     |         |           |           |           |           |   |       |
|              | 4     | 4.6  | AESGVTIKQLWEFGIE<br>K              | ITRAQ4plex@N-term;<br>ITRAQ4plex(K)@8;<br>ITRAQ4plex(K)@17                      | missed K-Q@8                                        | -0.0011 | 2366.3201 | 592.5873  | 2366.3211 | 592.5876  | 4 | 34.18 |
|              | 4     | 4.6  | DSTLRPETVQR                        | ITRAQ4plex@N-term                                                               |                                                     | -0.0052 | 1444.7703 | 482.5974  | 1444.7756 | 482.5991  | 3 | 26.45 |
|              | 4     | 4.6  | ENAVDAFSEILR                       | ITRAQ4plex@N-term                                                               |                                                     | 0.0069  | 1506.7869 | 754.4007  | 1506.7800 | 754.3973  | 2 | 35.20 |

|          |       |      |                                   |                                                                                                   |                                                         |         |           |          |           |          |   |       |
|----------|-------|------|-----------------------------------|---------------------------------------------------------------------------------------------------|---------------------------------------------------------|---------|-----------|----------|-----------|----------|---|-------|
|          | 4     | 4.6  | FMYKPGSMIQYSFIPK                  | ITRAQ4plex@N-term;<br>ITRAQ4plex(K)@4;<br>Deamidated(Q)@10;<br>ITRAQ4plex(K)@17                   |                                                         | 0.0164  | 2497.3279 | 833.4499 | 2497.3115 | 833.4444 | 3 | 35.48 |
|          | 4     | 4.6  | GGALS                             | No ITRAQ4plex@N-term                                                                              | cleaved L-G@N-term; cleaved S-M@C-term                  | -0.0105 | 403.1963  | 404.2035 | 403.2067  | 404.2140 | 1 | 46.96 |
| LIC11940 |       |      |                                   |                                                                                                   |                                                         |         |           |          |           |          |   |       |
|          | 4.31  | 13.4 | ELATLLEQGHVTLVAR                  | ITRAQ4plex@N-term                                                                                 |                                                         | -0.0513 | 2107.1611 | 703.3943 | 2107.2123 | 703.4114 | 3 | 35.16 |
|          | 4.31  | 13.4 | ENIYVPAR                          | ITRAQ4plex@N-term                                                                                 |                                                         | -0.0080 | 1104.5969 | 553.3057 | 1104.6049 | 553.3097 | 2 | 27.82 |
|          | 4.31  | 13.4 | GLDEIYASGVMHNIK<br>PDEFDVEK       | ITRAQ4plex@N-term;<br>ITRAQ4plex(K)@16;<br>ITRAQ4plex(K)@24                                       |                                                         | -0.0147 | 3200.5918 | 801.1552 | 3200.6065 | 801.1589 | 4 | 40.87 |
|          | 4.31  | 13.4 | GLFWLISAK                         | ITRAQ4plex@N-term;<br>ITRAQ4plex(K)@9                                                             |                                                         | 0.0076  | 1321.8079 | 661.9112 | 1321.8002 | 661.9074 | 2 | 37.98 |
|          | 4.31  | 13.4 | IGISSIAGDRGRR                     | ITRAQ4plex@N-term                                                                                 | cleaved I-I@N-term; missed R-G@10;<br>missed R-R@12     | -0.0249 | 1500.8358 | 751.4252 | 1500.8607 | 751.4376 | 2 | 38.92 |
|          | 4.31  | 13.4 | IPSFIFR                           | ITRAQ4plex@N-term                                                                                 | cleaved C-I@N-term                                      | 0.0089  | 1022.6124 | 512.3135 | 1022.6035 | 512.3090 | 2 | 34.64 |
| LIC11955 |       |      |                                   |                                                                                                   |                                                         |         |           |          |           |          |   |       |
|          | 4     | 11.3 | AVAGFHTLDR                        | ITRAQ4plex@N-term                                                                                 |                                                         | -0.0062 | 1229.6576 | 410.8932 | 1229.6639 | 410.8952 | 3 | 29.64 |
|          | 4     | 11.3 | EANLTNESYSK                       | ITRAQ4plex@N-term;<br>ITRAQ4plex(K)@11                                                            |                                                         | 0.0000  | 1542.7770 | 772.3958 | 1542.7769 | 772.3957 | 2 | 26.92 |
|          | 4     | 11.3 | LELPK                             | ITRAQ4plex@N-term;<br>ITRAQ4plex(K)@5                                                             |                                                         | -0.0018 | 886.5713  | 444.2929 | 886.5731  | 444.2938 | 2 | 29.66 |
|          | 4     | 11.3 | RNKYERAVAGFHTLDR                  | ITRAQ4plex@N-term;<br>ITRAQ4plex(K)@3;<br>Oxidation(R)@6;<br>Deamidated(R)@16                     | missed R-N@1; missed K-Y@3; missed R-A@6                | 0.0746  | 2237.2656 | 746.7625 | 2237.1909 | 746.7376 | 3 | 36.84 |
| LIC11958 |       |      |                                   |                                                                                                   |                                                         |         |           |          |           |          |   |       |
|          | 2     | 2.7  | AVPILFEILK                        | ITRAQ4plex@N-term;<br>ITRAQ4plex(K)@10                                                            |                                                         | 0.9744  | 1430.8896 | 716.4521 | 1429.9152 | 715.9649 | 2 | 38.62 |
|          | 2     | 2.5  | ESTL                              | Glu->pyro-Glu@N-term                                                                              | cleaved A-E@N-term; cleaved L-L@C-term                  | 0.1282  | 430.3345  | 431.3418 | 430.2064  | 431.2136 | 1 | 58.37 |
|          | 2     | 2.7  | IRSSDPSPLPGTSSPDLR<br>LRPSGGESGSP | No ITRAQ4plex@N-term                                                                              | cleaved P-I@N-term; cleaved P-P@C-term;<br>missed R-S@2 | 0.0093  | 2636.2771 | 879.7663 | 2636.2678 | 879.7632 | 3 | 40.46 |
|          | 2     | 2.7  | KEVLQVLK                          | ITRAQ4plex@N-term;<br>ITRAQ4plex(K)@1;<br>ITRAQ4plex(K)@9                                         |                                                         | 0.1343  | 1501.1311 | 501.3843 | 1500.9969 | 501.3396 | 3 | 45.03 |
|          | 2     | 2.7  | LHENFNDPEIR                       | ITRAQ4plex@N-term                                                                                 |                                                         | 0.0046  | 1526.7645 | 509.9288 | 1526.7599 | 509.9273 | 3 | 29.89 |
|          | 2     | 2.7  | NLKNKQEVK                         | ITRAQ4plex@N-term;<br>ITRAQ4plex(K)@3;<br>Deamidated(N)@4;<br>ITRAQ4plex(K)@5;<br>ITRAQ4plex(K)@9 | missed K-N@3; missed K-Q@5                              | -0.1037 | 1676.9235 | 559.9818 | 1677.0272 | 560.0164 | 3 | 35.26 |
|          | 2     | 2.7  | SPDLR                             | No ITRAQ4plex@N-term                                                                              | cleaved S-S@N-term; cleaved R-P@C-term                  | 0.0446  | 586.3521  | 587.3594 | 586.3075  | 587.3148 | 1 | 54.24 |
|          | 2     | 2.7  | SSLGK                             | No ITRAQ4plex@N-term;<br>ITRAQ4plex(K)@5                                                          | cleaved V-S@N-term                                      | 0.0056  | 634.3828  | 635.3900 | 634.3772  | 635.3845 | 1 | 54.80 |
|          | 2     | 2.5  | TKKLK                             | ITRAQ4plex@N-term;<br>ITRAQ4plex(K)@2;<br>ITRAQ4plex(K)@3;<br>ITRAQ4plex(K)@5                     | cleaved A-T@N-term; missed K-K@2;<br>missed K-L@3       | 0.1165  | 1192.9520 | 597.4833 | 1192.8354 | 597.4250 | 2 | 50.57 |
| LIC11966 |       |      |                                   |                                                                                                   |                                                         |         |           |          |           |          |   |       |
|          | 12.39 | 44.7 | IMEIMNASTNDLDALNAAMEK             | ITRAQ4plex@N-term;<br>ITRAQ4plex(K)@21                                                            |                                                         | -0.0193 | 2582.2441 | 861.7553 | 2582.2634 | 861.7617 | 3 | 37.65 |
|          | 12.39 | 44.7 | IMEIMNASTNDLDALNAAMEKEDLTNAENVR   | ITRAQ4plex@N-term;<br>ITRAQ4plex(K)@21                                                            |                                                         | -0.0122 | 3723.7876 | 931.9542 | 3723.7997 | 931.9572 | 4 | 37.73 |
| LIC11972 |       |      |                                   |                                                                                                   |                                                         |         |           |          |           |          |   |       |
|          | 1.7   | 8.3  | GEINQSMEANR                       | ITRAQ4plex@N-term                                                                                 |                                                         | 0.0040  | 1391.6625 | 696.8385 | 1391.6585 | 696.8365 | 2 | 24.51 |
|          | 1.7   | 8.3  | GEINQSMEANRVRELNK                 | ITRAQ4plex@N-term;<br>Deamidated(N)@10;<br>Deamidated(N)@17;<br>ITRAQ4plex(K)@18                  | missed R-V@11; missed R-E@13                            | -0.0439 | 2390.2029 | 797.7416 | 2390.2467 | 797.7562 | 3 | 29.34 |
| LIC11978 |       |      |                                   |                                                                                                   |                                                         |         |           |          |           |          |   |       |
|          | 6     | 44.5 | AEVNDTNFK                         | ITRAQ4plex@N-term;<br>ITRAQ4plex(K)@9                                                             | cleaved L-A@N-term                                      | -0.0013 | 1324.6854 | 663.3500 | 1324.6867 | 663.3506 | 2 | 27.41 |
|          | 6     | 44.5 | DGQLVDKVGALPK                     | ITRAQ4plex@N-term;<br>ITRAQ4plex(K)@7;<br>ITRAQ4plex(K)@14                                        | missed K-V@7                                            | -0.0200 | 1884.1210 | 629.0476 | 1884.1410 | 629.0543 | 3 | 43.25 |
|          | 6     | 44.5 | KLNVDDNQDTAQLGSSIPTLLLYK          | ITRAQ4plex@N-term;<br>ITRAQ4plex(K)@1;<br>ITRAQ4plex(K)@26                                        | missed K-L@1                                            | -0.0131 | 3277.8005 | 820.4574 | 3277.8135 | 820.4606 | 4 | 39.67 |
|          | 6     | 44.5 | LAEVNDTNFK                        | ITRAQ4plex@N-term;<br>Deamidated(N)@5;<br>Oxidation(F)@9;<br>ITRAQ4plex(K)@10                     | cleaved A-L@N-term                                      | -0.0225 | 1454.7272 | 485.9163 | 1454.7497 | 485.9238 | 3 | 27.97 |

|          |       |      |                               |                                                                                 |                                          |         |           |           |           |           |   |       |
|----------|-------|------|-------------------------------|---------------------------------------------------------------------------------|------------------------------------------|---------|-----------|-----------|-----------|-----------|---|-------|
|          | 6     | 44.5 | MVAPVLEELSGELDG<br>LVK        | ITRAQ4plex@N-term;<br>ITRAQ4plex(K)@18                                          |                                          | 0.0249  | 2186.2361 | 729.7526  | 2186.2112 | 729.7443  | 3 | 2.80  |
| LIC11985 |       |      |                               |                                                                                 |                                          |         |           |           |           |           |   |       |
|          | 4     | 38.5 | EEGNAIDGLNGTQIR               | ITRAQ4plex@N-term;<br>Deamidated(N)@11                                          |                                          | 0.0003  | 1801.8932 | 901.9539  | 1801.8928 | 901.9537  | 2 | 29.51 |
|          | 4     | 38.5 | MNIYIGNLAYQATEDD<br>LRK       | ITRAQ4plex@N-term;<br>ITRAQ4plex(K)@19                                          | missed R-K@18                            | 0.0027  | 2515.3010 | 839.4410  | 2515.2984 | 839.4401  | 3 | 35.37 |
|          | 4     | 38.5 | NGTQIR                        | ITRAQ4plex@N-term;<br>Deamidated(Q)@4                                           | cleaved L-N@N-term                       | 0.0041  | 832.4567  | 417.2356  | 832.4525  | 417.2335  | 2 | 24.20 |
|          | 4     | 38.5 | QATEDDLRK                     | ITRAQ4plex@N-term;<br>ITRAQ4plex(K)@9                                           | cleaved Y-Q@N-term; missed R-K@8         | -0.0195 | 1362.7152 | 455.2457  | 1362.7347 | 455.2522  | 3 | 26.64 |
|          | 4     | 38.5 | VNEALP                        | ITRAQ4plex@N-term;<br>Deamidated(N)@2                                           | cleaved P-K@C-term                       | 0.0227  | 786.4472  | 787.4545  | 786.4245  | 787.4318  | 1 | 53.35 |
| LIC11990 |       |      |                               |                                                                                 |                                          |         |           |           |           |           |   |       |
|          | 2.03  | 2.1  | DPITGTEIEGSNYAEG<br>YYQRGR    | ITRAQ4plex@N-term;<br>Deamidated(N)@12                                          | missed R-G@20                            | 0.1134  | 2620.3296 | 874.4505  | 2620.2163 | 874.4127  | 3 | 38.64 |
|          | 2.03  | 2.1  | EGLQRQKCLR                    | ITRAQ4plex@N-term;<br>Deamidated(Q)@4;<br>ITRAQ4plex(K)@7;<br>ITRAQ4plex(K)@8   | missed R-Q@5; missed K-K@7; missed K-L@8 | -0.0918 | 1801.0345 | 601.3521  | 1801.1263 | 601.3827  | 3 | 37.63 |
|          | 2.03  | 2.1  | GLLELIK                       | ITRAQ4plex@N-term;<br>ITRAQ4plex(K)@7                                           |                                          | -0.0088 | 1072.7012 | 537.3578  | 1072.7100 | 537.3623  | 2 | 43.30 |
|          | 2.03  | 2.1  | GQVWDNSK                      | ITRAQ4plex@N-term;<br>ITRAQ4plex(K)@8                                           |                                          | 0.0030  | 1220.6423 | 611.3284  | 1220.6393 | 611.3269  | 2 | 59.54 |
|          | 2.03  | 2.1  | IESSPEEIAFDLGSVVG<br>EPVSVSQR | ITRAQ4plex@N-term                                                               |                                          | -0.0320 | 2788.3933 | 930.4717  | 2788.4253 | 930.4824  | 3 | 42.70 |
|          | 2.03  | 2.1  | NPDISEELNPMLSVFR              | ITRAQ4plex@N-term;<br>Deamidated(N)@9                                           |                                          | 0.1318  | 2005.1266 | 669.3828  | 2004.9948 | 669.3389  | 3 | 37.98 |
|          | 2.03  | 2.1  | QSYGAREEDETLIQG<br>NVGR       | Gln->pyro-Glu@N-term;<br>Deamidated(R)@6                                        | missed R-E@6                             | 0.0272  | 2104.9932 | 1053.5040 | 2104.9661 | 1053.4903 | 2 | 24.43 |
|          | 2.03  | 2.1  | TPLPPEIQRELR                  | ITRAQ4plex@N-term;<br>Oxidation(P)@5                                            | missed R-E@9                             | -0.0127 | 1607.8990 | 804.9568  | 1607.9117 | 804.9631  | 2 | 33.43 |
|          | 2.03  | 2.1  | VINHHRQIK                     | ITRAQ4plex@N-term;<br>ITRAQ4plex(K)@9                                           | cleaved F-V@N-term; missed R-Q@6         | 0.0363  | 1431.9030 | 716.9587  | 1431.8666 | 716.9406  | 2 | 36.80 |
| LIC11992 |       |      |                               |                                                                                 |                                          |         |           |           |           |           |   |       |
|          | 2     | 3.6  | ELLDEIENIHLGIR                | ITRAQ4plex@N-term                                                               |                                          | -0.0217 | 1906.0430 | 636.3549  | 1906.0646 | 636.3621  | 3 | 37.56 |
|          | 2     | 3.6  | FSIK                          | No ITRAQ4plex@N-term;<br>ITRAQ4plex(K)@4                                        | cleaved P-F@N-term                       | -0.0034 | 637.3887  | 638.3960  | 637.3921  | 638.3994  | 1 | 55.89 |
|          | 2     | 3.6  | IGGSTEEAQR                    | ITRAQ4plex@N-term                                                               | cleaved H-I@N-term                       | 0.0385  | 1190.6398 | 596.3271  | 1190.6013 | 596.3079  | 2 | 26.88 |
|          | 2     | 3.6  | VVDLEALAK                     | ITRAQ4plex@N-term;<br>ITRAQ4plex(K)@9                                           |                                          | 0.0082  | 1244.7666 | 623.3906  | 1244.7584 | 623.3865  | 2 | 36.20 |
| LIC12001 |       |      |                               |                                                                                 |                                          |         |           |           |           |           |   |       |
|          | 2.14  | 4.9  | INAYGQSLRDIAPLLW<br>VAR       | ITRAQ4plex@N-term;<br>Oxidation(N)@2;<br>Oxidation(W)@16                        | missed R-D@9                             | 0.0634  | 2331.3455 | 778.1224  | 2331.2821 | 778.1013  | 3 | 56.40 |
|          | 4.01  | 4.9  | KNTVQATLASR                   | ITRAQ4plex@N-term;<br>ITRAQ4plex(K)@1                                           | missed K-N@1                             | -0.0209 | 1475.8455 | 492.9557  | 1475.8664 | 492.9627  | 3 | 28.82 |
|          | 4.01  | 4.9  | NTVQATLASR                    | ITRAQ4plex@N-term;<br>Deamidated(N)@1                                           |                                          | 0.0130  | 1204.6664 | 603.3405  | 1204.6533 | 603.3340  | 2 | 27.32 |
|          | 4.01  | 4.9  | PVPYYSK                       | ITRAQ4plex@N-term;<br>ITRAQ4plex(K)@6                                           | cleaved R-P@N-term                       | -0.0227 | 977.5562  | 489.7854  | 977.5790  | 489.7968  | 2 | 26.72 |
|          | 2.14  | 4.9  | QARPVYYSK                     | ITRAQ4plex@N-term;<br>ITRAQ4plex(K)@9                                           |                                          | -0.0104 | 1332.7654 | 445.2624  | 1332.7758 | 445.2659  | 3 | 36.60 |
| LIC12002 |       |      |                               |                                                                                 |                                          |         |           |           |           |           |   |       |
|          | 33.03 | 29.0 | AHSIAAQGGINAAK                | ITRAQ4plex@N-term;<br>ITRAQ4plex(K)@14                                          |                                          | -0.1372 | 1595.7615 | 798.8880  | 1595.8987 | 798.9566  | 2 | 55.27 |
|          | 33.03 | 29.0 | ALNDAEETTKK                   | ITRAQ4plex@N-term;<br>Deamidated(N)@3;<br>ITRAQ4plex(K)@10;<br>ITRAQ4plex(K)@11 | missed K-K@10                            | -0.0402 | 1651.8593 | 551.6270  | 1651.8994 | 551.6404  | 3 | 27.02 |
|          | 19.91 | 14.8 | DIASRAAK                      | ITRAQ4plex@N-term;<br>Oxidation(D)@1;<br>Deamidated(R)@5;<br>ITRAQ4plex(K)@8    | missed R-A@5                             | -0.0750 | 1135.5691 | 568.7918  | 1135.6441 | 568.8293  | 2 | 37.80 |
|          | 33.03 | 29.0 | DRYENLFQMYEQITG<br>ENPYK      | ITRAQ4plex@N-term;<br>ITRAQ4plex(K)@20                                          | missed R-Y@2                             | -0.0132 | 2825.3442 | 942.7887  | 2825.3574 | 942.7931  | 3 | 42.51 |
|          | 33.03 | 29.0 | EEGEAK                        | ITRAQ4plex@N-term;<br>ITRAQ4plex(K)@6                                           | cleaved Q-E@N-term                       | 0.0212  | 949.5172  | 475.7659  | 949.4960  | 475.7553  | 2 | 27.32 |
|          | 33.03 | 29.0 | EEYQEEGEAK                    | ITRAQ4plex@N-term;<br>ITRAQ4plex(K)@10                                          |                                          | 0.0047  | 1498.7079 | 750.3612  | 1498.7031 | 750.3588  | 2 | 25.75 |
|          | 33.03 | 29.0 | EKLEFENVHLAT                  | ITRAQ4plex@N-term;<br>ITRAQ4plex(K)@2                                           | cleaved T-R@C-term; missed K-L@2         | 0.0050  | 1716.9340 | 573.3186  | 1716.9290 | 573.3169  | 3 | 32.41 |
|          | 19.91 | 14.8 | EKLEFENVHLATR                 | Carbamyl@N-term;<br>ITRAQ4plex(K)@2                                             | missed K-L@2                             | 0.0134  | 1771.9473 | 591.6564  | 1771.9339 | 591.6519  | 3 | 46.56 |
|          | 19.91 | 14.8 | ENLFQMYEQITGENPY<br>K         | ITRAQ4plex@N-term;<br>ITRAQ4plex(K)@17                                          | cleaved Y-E@N-term                       | -0.1044 | 2391.0618 | 798.0278  | 2391.1660 | 798.0626  | 3 | 30.53 |

|          |      |                            |                                                                                                           |                                           |         |           |          |           |          |   |       |
|----------|------|----------------------------|-----------------------------------------------------------------------------------------------------------|-------------------------------------------|---------|-----------|----------|-----------|----------|---|-------|
| 33.03    | 29.0 | FCHATAWEFNGVKG             | ITRAQ4plex@N-term; Methylthio(C)@2; Deamidated(N)@10; ITRAQ4plex(K)@14                                    |                                           | 0.0061  | 1900.8905 | 634.6375 | 1900.8844 | 634.6354 | 3 | 34.29 |
| 33.03    | 29.0 | GCVNTATWK                  | ITRAQ4plex@N-term; Methylthio(C)@2; ITRAQ4plex(K)@9                                                       |                                           | 0.0417  | 1312.6929 | 657.3537 | 1312.6511 | 657.3328 | 2 | 45.81 |
| 33.03    | 29.0 | GKRTVDSFHRQLGK             | ITRAQ4plex@N-term; ITRAQ4plex(K)@2; Deamidated(R)@3; Deamidated(R)@10; Deamidated(Q)@11; ITRAQ4plex(K)@14 | missed K-R@2; missed R-T@3; missed R-Q@10 | -0.1309 | 2063.0181 | 688.6799 | 2063.1489 | 688.7236 | 3 | 40.31 |
| 33.03    | 29.0 | GLKEALSEI                  | No ITRAQ4plex@N-term; ITRAQ4plex(K)@3                                                                     | cleaved I-P@C-term                        | -0.0474 | 1102.5883 | 552.3014 | 1102.6356 | 552.3251 | 2 | 29.49 |
| 33.03    | 29.0 | GQTGQQLLLGAYSALSR          | ITRAQ4plex@N-term                                                                                         |                                           | 0.0020  | 1906.0414 | 954.0280 | 1906.0394 | 954.0270 | 2 | 35.10 |
| 33.03    | 29.0 | IPNGSIDK                   | ITRAQ4plex@N-term; Deamidated(N)@3; ITRAQ4plex(K)@8                                                       |                                           | 0.0000  | 1131.6379 | 566.8262 | 1131.6379 | 566.8262 | 2 | 28.07 |
| 33.03    | 29.0 | IPNGSIDKK                  | ITRAQ4plex@N-term; Deamidated(N)@3; ITRAQ4plex(K)@8; ITRAQ4plex(K)@9                                      | missed K-K@8                              | -0.0368 | 1403.7982 | 468.9400 | 1403.8349 | 468.9523 | 3 | 29.03 |
| 33.03    | 29.0 | IREEFWQNVNVPGSGTELNQSLEK   | ITRAQ4plex@N-term; ITRAQ4plex(K)@24                                                                       | missed R-E@2                              | -0.0245 | 3061.5469 | 766.3940 | 3061.5712 | 766.4001 | 4 | 33.99 |
| 33.03    | 29.0 | KYPSYGNLSPR                | ITRAQ4plex@N-term; ITRAQ4plex(K)@1                                                                        | missed K-Y@1                              | 0.0191  | 1568.8745 | 523.9655 | 1568.8555 | 523.9591 | 3 | 46.48 |
| 33.03    | 29.0 | LAEVSVINIDQCVAQGVFPAR      | ITRAQ4plex@N-term; Methylthio(C)@12                                                                       |                                           | -0.0004 | 2418.2517 | 807.0912 | 2418.2521 | 807.0913 | 3 | 48.36 |
| 33.03    | 29.0 | LEFENVHLATR                | ITRAQ4plex@N-term                                                                                         |                                           | 0.0098  | 1471.8003 | 491.6074 | 1471.7905 | 491.6041 | 3 | 32.55 |
| 19.91    | 14.8 | LFYDVTVK                   | ITRAQ4plex@N-term; ITRAQ4plex(K)@7                                                                        |                                           | 0.0004  | 1172.6688 | 587.3417 | 1172.6685 | 587.3415 | 2 | 43.14 |
| 19.91    | 14.8 | LLSIK                      | ITRAQ4plex@N-term; ITRAQ4plex(K)@5                                                                        |                                           | 0.0106  | 860.6045  | 431.3095 | 860.5939  | 431.3042 | 2 | 41.75 |
| 19.91    | 14.8 | LPYTIIGNYLAGVGFNSHPK       | ITRAQ4plex@N-term; Methyl(H)@17; ITRAQ4plex(K)@19                                                         | cleaved I-L@N-term                        | -0.0123 | 2349.2603 | 588.3223 | 2349.2725 | 588.3254 | 4 | 48.81 |
| 33.03    | 29.0 | LVNPANK                    | ITRAQ4plex@N-term; ITRAQ4plex(K)@7                                                                        |                                           | -0.0010 | 1042.6368 | 522.3257 | 1042.6379 | 522.3262 | 2 | 28.04 |
| 33.03    | 29.0 | LVNPANKR                   | ITRAQ4plex@N-term; ITRAQ4plex(K)@7                                                                        | missed K-R@7                              | -0.0442 | 1198.6948 | 400.5722 | 1198.7390 | 400.5869 | 3 | 28.34 |
| 33.03    | 29.0 | NPADIPESER                 | ITRAQ4plex@N-term                                                                                         |                                           | 0.0024  | 1270.6299 | 636.3222 | 1270.6275 | 636.3210 | 2 | 25.88 |
| 33.03    | 29.0 | NPADIPESERDYLLER           | ITRAQ4plex@N-term                                                                                         | missed R-D@10                             | 0.0019  | 2110.0110 | 704.3442 | 2110.0089 | 704.3436 | 3 | 30.90 |
| 33.03    | 29.0 | NYQNDGDSVYR                | ITRAQ4plex@N-term; ITRAQ4plex(Y)@10                                                                       |                                           | -0.0019 | 1617.7607 | 540.2609 | 1617.7627 | 540.2615 | 3 | 25.91 |
| 33.03    | 29.0 | QIGLGSVK                   | Gln->pyro-Glu@N-term; ITRAQ4plex(K)@8                                                                     |                                           | -0.0037 | 927.5474  | 464.7810 | 927.5511  | 464.7828 | 2 | 39.69 |
| 33.03    | 29.0 | RAHSIAAQGGINAAK            | No ITRAQ4plex@N-term; Deamidated(Q)@8; Oxidation(N)@12; ITRAQ4plex(K)@15                                  | missed R-A@1                              | 0.0371  | 1624.9138 | 542.6452 | 1624.8767 | 542.6328 | 3 | 45.98 |
| 19.91    | 14.8 | RNPADIPESER                | Carbamyl@N-term                                                                                           | missed R-N@1                              | 0.0077  | 1325.6401 | 663.8273 | 1325.6324 | 663.8235 | 2 | 34.47 |
| 19.91    | 14.8 | TIGNYLAGVGFNSHPK           | ITRAQ4plex@N-term; Deamidated(N)@12; ITRAQ4plex(K)@16                                                     | cleaved Y-T@N-term                        | 0.0267  | 1963.0675 | 655.3631 | 1963.0407 | 655.3542 | 3 | 49.10 |
| 19.91    | 14.8 | TVDSFHR                    | ITRAQ4plex@N-term                                                                                         |                                           | -0.0008 | 1004.5154 | 503.2650 | 1004.5161 | 503.2653 | 2 | 35.85 |
| 19.91    | 14.8 | VDSFHR                     | ITRAQ4plex@N-term; ITRAQ4plex(S)@3                                                                        | cleaved T-V@N-term                        | -0.0540 | 1047.5166 | 524.7656 | 1047.5705 | 524.7925 | 2 | 35.52 |
| 33.03    | 29.0 | VVRDLVTGK                  | ITRAQ4plex@N-term; Deamidated(R)@3; ITRAQ4plex(K)@9                                                       | cleaved I-V@N-term; missed R-D@3          | -0.0174 | 1274.7628 | 638.3887 | 1274.7802 | 638.3974 | 2 | 44.58 |
| 33.03    | 29.0 | YENLFQMYEQITGENPYK         | ITRAQ4plex@N-term; ITRAQ4plex(K)@18                                                                       |                                           | 0.0377  | 2554.2671 | 852.4296 | 2554.2294 | 852.4171 | 3 | 39.04 |
| 33.03    | 29.0 | YPSYGNLSPR                 | ITRAQ4plex@N-term                                                                                         |                                           | 0.0038  | 1296.6624 | 649.3384 | 1296.6584 | 649.3365 | 2 | 29.04 |
| LIC12003 |      |                            |                                                                                                           |                                           |         |           |          |           |          |   |       |
| 8.13     | 23.0 | AFPVLK                     | ITRAQ4plex@N-term; ITRAQ4plex(K)@6                                                                        |                                           | 0.0104  | 961.6308  | 481.8227 | 961.6204  | 481.8175 | 2 | 40.35 |
| 8.13     | 23.0 | DGDTVYVEPWR                | ITRAQ4plex@N-term                                                                                         |                                           | 0.0033  | 1479.7150 | 740.8647 | 1479.7116 | 740.8631 | 2 | 31.01 |
| 8.13     | 23.0 | DISPNMSFLEMLDVVN EELITK    | ITRAQ4plex@N-term; ITRAQ4plex(K)@22                                                                       |                                           | 0.0077  | 2824.4558 | 942.4926 | 2824.4482 | 942.4900 | 3 | 41.71 |
| 8.13     | 23.0 | GEDPIAFEHDCR               | ITRAQ4plex@N-term; Methylthio(C)@11                                                                       |                                           | -0.0035 | 1577.6689 | 526.8969 | 1577.6724 | 526.8981 | 3 | 31.49 |
| 8.13     | 23.0 | IIOAGGFISVNTGGAP DANALPIPK | ITRAQ4plex@N-term; Deamidated(N)@19; ITRAQ4plex(K)@25                                                     |                                           | -0.0506 | 2709.4441 | 904.1553 | 2709.4945 | 904.1721 | 3 | 56.42 |

|          |       |      |                                 |                                                                                                    |                                  |         |           |          |           |          |   |       |
|----------|-------|------|---------------------------------|----------------------------------------------------------------------------------------------------|----------------------------------|---------|-----------|----------|-----------|----------|---|-------|
|          | 8.13  | 23.0 | ITHLGLLPQGK                     | ITRAQ4plex@N-term;<br>ITRAQ4plex(K)@11                                                             |                                  | -0.0105 | 1463.8964 | 488.9727 | 1463.9068 | 488.9762 | 3 | 31.77 |
|          | 4.92  | 10.7 | IVDYNAK                         | ITRAQ4plex@N-term;<br>ITRAQ4plex(K)@7                                                              |                                  | -0.0025 | 1109.6300 | 555.8223 | 1109.6324 | 555.8235 | 2 | 37.11 |
|          | 8.13  | 23.0 | NASAMLFVSAK                     | ITRAQ4plex@N-term;<br>Deamidated(N)@1;<br>ITRAQ4plex(K)@11                                         |                                  | 0.0178  | 1426.7911 | 714.4028 | 1426.7734 | 714.3940 | 2 | 56.96 |
|          | 4.92  | 10.7 | SFKDGDVTYVYEPWR                 | ITRAQ4plex@N-term;<br>ITRAQ4plex(K)@3                                                              |                                  | 0.0035  | 1986.0126 | 663.0115 | 1986.0091 | 663.0103 | 3 | 47.63 |
| LIC13520 |       |      |                                 |                                                                                                    |                                  |         |           |          |           |          |   |       |
|          | 23.68 | 22.8 | ADPKPQVNEER                     | ITRAQ4plex@N-term;<br>ITRAQ4plex(K)@5                                                              |                                  | -0.0561 | 1684.8063 | 562.6094 | 1684.8624 | 562.6281 | 3 | 25.55 |
|          | 8.27  | 9.1  | ANQTAHYGNR                      | ITRAQ4plex@N-term;<br>Deamidated(N)@2                                                              |                                  | -0.0072 | 1404.6432 | 469.2217 | 1404.6504 | 469.2241 | 3 | 34.83 |
|          | 23.68 | 22.8 | AYSKPSSTNPNER                   | ITRAQ4plex@N-term;<br>ITRAQ4plex(K)@4                                                              | cleaved Y-A@N-term               | -0.0004 | 1737.8885 | 580.3035 | 1737.8889 | 580.3036 | 3 | 25.18 |
|          | 23.68 | 22.8 | EISEFITK                        | ITRAQ4plex@N-term;<br>ITRAQ4plex(K)@8                                                              |                                  | 0.0022  | 1253.7133 | 627.8639 | 1253.7111 | 627.8628 | 2 | 31.07 |
|          | 23.68 | 22.8 | FFQNELDKLK                      | ITRAQ4plex@N-term;<br>ITRAQ4plex(K)@8;<br>ITRAQ4plex(K)@10                                         | missed K-L@8                     | 0.0030  | 1712.9857 | 572.0025 | 1712.9827 | 572.0015 | 3 | 35.79 |
|          | 23.68 | 22.8 | GIEPDPNTASITTOAK                | ITRAQ4plex@N-term;<br>ITRAQ4plex(K)@16                                                             |                                  | -0.0172 | 1930.0079 | 644.3433 | 1930.0251 | 644.3490 | 3 | 28.55 |
|          | 23.68 | 22.8 | IAETNNQNTNIVTK                  | ITRAQ4plex@N-term;<br>ITRAQ4plex(K)@14                                                             |                                  | -0.0136 | 1846.9856 | 616.6691 | 1846.9992 | 616.6737 | 3 | 27.66 |
|          | 23.68 | 22.8 | IAETNNQNTNIVTKDE<br>YDR         | ITRAQ4plex@N-term;<br>Deamidated(N)@8;<br>ITRAQ4plex(K)@14                                         |                                  | -0.0083 | 2526.2358 | 843.0859 | 2526.2442 | 843.0887 | 3 | 29.63 |
|          | 8.27  | 9.1  | IAPILQK                         | ITRAQ4plex@N-term;<br>ITRAQ4plex(K)@7                                                              |                                  | -0.0006 | 1069.7097 | 535.8621 | 1069.7103 | 535.8624 | 2 | 41.50 |
|          | 23.68 | 22.8 | IEKIYPK                         | ITRAQ4plex@N-term;<br>ITRAQ4plex(K)@3;<br>Oxidation(Y)@5;<br>ITRAQ4plex(K)@7                       | missed K-I@3                     | -0.0024 | 1337.8260 | 446.9493 | 1337.8284 | 446.9501 | 3 | 56.44 |
|          | 8.27  | 9.1  | ILFVK                           | ITRAQ4plex@N-term;<br>ITRAQ4plex(K)@5                                                              |                                  | 0.0003  | 906.6149  | 454.3147 | 906.6146  | 454.3146 | 2 | 43.71 |
|          | 23.68 | 22.8 | IPEDFGK                         | ITRAQ4plex@N-term;<br>ITRAQ4plex(K)@7                                                              |                                  | 0.0073  | 1092.6132 | 547.3138 | 1092.6059 | 547.3102 | 2 | 29.93 |
|          | 8.27  | 9.1  | ISSESLK                         | ITRAQ4plex@N-term;<br>ITRAQ4plex(K)@7                                                              |                                  | -0.0062 | 1050.6104 | 526.3124 | 1050.6165 | 526.3155 | 2 | 36.75 |
|          | 23.68 | 22.8 | ITSGMLEFAFGR                    | ITRAQ4plex@N-term                                                                                  | cleaved L-I@N-term               | 0.0223  | 1471.7838 | 491.6019 | 1471.7615 | 491.5944 | 3 | 59.07 |
|          | 23.68 | 22.8 | KQSIFQDYISK                     | ITRAQ4plex@N-term;<br>ITRAQ4plex(K)@1;<br>ITRAQ4plex(K)@11                                         | missed K-Q@1                     | -0.0185 | 1787.9961 | 597.0060 | 1788.0147 | 597.0122 | 3 | 35.49 |
|          | 23.68 | 22.8 | LITSGMLEFAFGR                   | ITRAQ4plex@N-term                                                                                  |                                  | -0.0038 | 1584.8418 | 793.4282 | 1584.8456 | 793.4301 | 2 | 53.64 |
|          | 23.68 | 22.8 | LYAYSKPSSTNPNER                 | ITRAQ4plex@N-term;<br>ITRAQ4plex(K)@6                                                              |                                  | -0.0110 | 2014.0254 | 672.3491 | 2014.0363 | 672.3527 | 3 | 28.39 |
|          | 23.68 | 22.8 | PDKPQVNEER                      | No ITRAQ4plex@N-term;<br>ITRAQ4plex(K)@3                                                           | cleaved D-P@N-term               | -0.0049 | 1354.6914 | 452.5711 | 1354.6963 | 452.5727 | 3 | 24.72 |
|          | 8.27  | 9.1  | QPSD                            | Gln->pyro-Glu@N-term                                                                               | cleaved D-P@C-term               | -0.0678 | 428.0865  | 429.0938 | 428.1543  | 429.1616 | 1 | 59.10 |
|          | 23.68 | 22.8 | QPSDPDPSIPK                     | ITRAQ4plex@N-term;<br>ITRAQ4plex(K)@11                                                             |                                  | -0.0044 | 1467.7769 | 734.8957 | 1467.7813 | 734.8979 | 2 | 27.51 |
|          | 8.27  | 9.1  | SELAVNERANQTAEH<br>YGNR         | ITRAQ4plex@N-term;<br>Deamidated(N)@6                                                              | cleaved Y-S@N-term; missed R-A@8 | 0.0464  | 2303.1477 | 768.7231 | 2303.1012 | 768.7077 | 3 | 46.04 |
|          | 23.68 | 22.8 | SGLKIVDLTPK                     | No ITRAQ4plex@N-term;<br>ITRAQ4plex(K)@4;<br>ITRAQ4plex(K)@11                                      | missed K-I@4                     | -0.0618 | 1457.8444 | 729.9294 | 1457.9061 | 729.9603 | 2 | 45.38 |
|          | 23.68 | 22.8 | SVLFMLIR                        | ITRAQ4plex@N-term                                                                                  |                                  | 0.0249  | 1121.7002 | 561.8574 | 1121.6753 | 561.8449 | 2 | 42.70 |
| LIC12016 |       |      |                                 |                                                                                                    |                                  |         |           |          |           |          |   |       |
|          | 4     | 15.6 | ALGVSPSYLSK                     | ITRAQ4plex@N-term;<br>ITRAQ4plex(K)@11                                                             |                                  | -0.0114 | 1408.8057 | 705.4101 | 1408.8169 | 705.4158 | 2 | 41.27 |
|          | 4     | 15.6 | IETGSDPTEK                      | ITRAQ4plex@N-term;<br>ITRAQ4plex(K)@11                                                             |                                  | 0.0013  | 1491.7673 | 746.8909 | 1491.7660 | 746.8903 | 2 | 33.49 |
|          | 2     | 9.2  | VELGLLEPPDFK                    | ITRAQ4plex@N-term;<br>ITRAQ4plex(K)@13                                                             |                                  | 0.0031  | 1772.9835 | 687.4990 | 1772.9804 | 687.4975 | 2 | 34.74 |
| LIC12032 |       |      |                                 |                                                                                                    |                                  |         |           |          |           |          |   |       |
|          | 18.29 | 18.8 | ASALAGTDPDYATR                  | ITRAQ4plex@N-term                                                                                  |                                  | -0.0013 | 1551.7638 | 776.8892 | 1551.7651 | 776.8898 | 2 | 28.47 |
|          | 18.29 | 18.8 | ASALAGTDPDYATRD<br>LFEAIERKEFPK | ITRAQ4plex@N-term;<br>Oxidation(P)@9;<br>Oxidation(R)@22;<br>ITRAQ4plex(K)@23;<br>ITRAQ4plex(K)@27 | missed R-D@14; missed R-K@22     | 0.1090  | 3474.9087 | 869.7344 | 3474.7996 | 869.7072 | 4 | 50.76 |
|          | 18.29 | 18.8 | ASIFSK                          | ITRAQ4plex@N-term;<br>ITRAQ4plex(K)@6                                                              |                                  | -0.0055 | 939.5579  | 470.7862 | 939.5633  | 470.7889 | 2 | 37.79 |
|          | 18.29 | 18.8 | DLFEAIER                        | ITRAQ4plex@N-term                                                                                  |                                  | -0.0026 | 1135.5969 | 568.8057 | 1135.5995 | 568.8070 | 2 | 32.84 |
|          | 18.29 | 18.8 | DLIYRSIYK                       | ITRAQ4plex@N-term;<br>ITRAQ4plex(K)@9                                                              | cleaved M-D@N-term; missed R-S@5 | -0.0043 | 1457.8444 | 729.9294 | 1457.8486 | 729.9316 | 2 | 45.38 |

|          |      |                            |                                                                                   |                                        |         |           |          |           |          |   |       |
|----------|------|----------------------------|-----------------------------------------------------------------------------------|----------------------------------------|---------|-----------|----------|-----------|----------|---|-------|
| 18.29    | 18.8 | DYPLIEVGVLELNSNP<br>K      | ITRAQ4plex@N-term;<br>ITRAQ4plex(K)@17                                            |                                        | -0.0055 | 2187.1975 | 730.0731 | 2187.2031 | 730.0750 | 3 | 50.60 |
| 18.29    | 18.8 | ERLTSIAIAMHNL              | ITRAQ4plex@N-term;<br>Deamidated(N)@13                                            | cleaved L-P@C-term; missed R-L@2       | 0.1025  | 1687.9709 | 563.6642 | 1687.8685 | 563.6301 | 3 | 38.78 |
| 18.29    | 18.8 | FNPFDLTK                   | ITRAQ4plex@N-term;<br>ITRAQ4plex(K)@8                                             |                                        | -0.0012 | 1268.6997 | 635.3571 | 1268.7009 | 635.3577 | 2 | 33.84 |
| 18.29    | 18.8 | FPDFIHSQK                  | ITRAQ4plex@N-term;<br>ITRAQ4plex(K)@9                                             |                                        | 0.0027  | 1405.7626 | 469.5948 | 1405.7598 | 469.5939 | 3 | 32.23 |
| 18.29    | 18.8 | FYTDEGIWDLVGNNT<br>PVFFAR  | ITRAQ4plex@N-term                                                                 |                                        | 0.0099  | 2604.2871 | 869.1030 | 2604.2771 | 869.0996 | 3 | 41.08 |
| 18.29    | 18.8 | GAGAYGLTITQDLTK            | ITRAQ4plex@N-term;<br>ITRAQ4plex(K)@16                                            |                                        | 0.0338  | 1897.0739 | 633.3652 | 1897.0400 | 633.3540 | 3 | 46.35 |
| 18.29    | 18.8 | GIQYQQLPVNRPK              | ITRAQ4plex@N-term;<br>ITRAQ4plex(K)@13                                            | cleaved L-G@N-term                     | -0.0187 | 1828.0376 | 610.3531 | 1828.0563 | 610.3594 | 3 | 29.78 |
| 18.29    | 18.8 | GPVLIQDTHLIEK              | ITRAQ4plex@N-term;<br>ITRAQ4plex(K)@13                                            |                                        | 0.0025  | 1750.0258 | 584.3492 | 1750.0233 | 584.3484 | 3 | 32.61 |
| 18.29    | 18.8 | GPVLIQDTHLIEKLAHF<br>NRER  | ITRAQ4plex@N-term;<br>Oxidation(P)@2;<br>ITRAQ4plex(K)@13;<br>Deamidated(R)@19    | missed K-L@13; missed R-E@19           | -0.0668 | 2790.4717 | 931.1645 | 2790.5384 | 931.1868 | 3 | 17.23 |
| 18.29    | 18.8 | GSHTFGLWNSKGER             | No ITRAQ4plex@N-term;<br>ITRAQ4plex(K)@11;<br>Oxidation(R)@14                     | cleaved Y-G@N-term; missed K-G@11      | -0.0078 | 1734.8481 | 579.2900 | 1734.8560 | 579.2926 | 3 | 26.94 |
| 18.29    | 18.8 | LGIQYQQLPVNR               | ITRAQ4plex@N-term;<br>Deamidated(Q)@4                                             | cleaved R-P@C-term                     | 0.0313  | 1572.9059 | 787.4602 | 1572.8746 | 787.4446 | 2 | 44.54 |
| 18.29    | 18.8 | LGIQYQQLPVNRPK             | ITRAQ4plex@N-term;<br>ITRAQ4plex(K)@14                                            |                                        | -0.0177 | 1941.1227 | 648.0482 | 1941.1403 | 648.0541 | 3 | 31.40 |
| 18.29    | 18.8 | LTSIAIAMHNLPK              | ITRAQ4plex@N-term;<br>ITRAQ4plex(K)@14                                            | cleaved K-P@C-term                     | -0.0020 | 1770.9885 | 591.3368 | 1770.9906 | 591.3375 | 3 | 33.81 |
| 18.29    | 18.8 | NLSMEKASALAGTD             | ITRAQ4plex@N-term;<br>Oxidation(N)@1;<br>ITRAQ4plex(K)@6                          | cleaved D-P@C-term; missed K-A@6       | -0.0026 | 1710.8677 | 856.4411 | 1710.8702 | 856.4424 | 2 | 53.95 |
| 18.29    | 18.8 | PLLEANLK                   | ITRAQ4plex@N-term;<br>ITRAQ4plex(K)@8                                             | cleaved K-P@N-term                     | 0.0067  | 1184.7439 | 593.3792 | 1184.7372 | 593.3759 | 2 | 31.61 |
| 18.29    | 18.8 | RDPVTGYK                   | ITRAQ4plex@N-term;<br>Oxidation(P)@3;<br>ITRAQ4plex(K)@8                          | missed R-D@1                           | -0.0132 | 1238.6731 | 620.3438 | 1238.6863 | 620.3504 | 2 | 28.75 |
| 18.29    | 18.8 | SIFSK                      | ITRAQ4plex@N-term;<br>ITRAQ4plex(K)@5                                             | cleaved A-S@N-term                     | -0.0043 | 868.5219  | 435.2682 | 868.5262  | 435.2704 | 2 | 34.43 |
| 18.26    | 14.5 | DPLKFPDFIHSQK              | Carbamyl@N-term;<br>ITRAQ4plex(K)@4;<br>ITRAQ4plex(K)@13                          | missed K-F@4                           | 0.0094  | 1902.0337 | 635.0185 | 1902.0243 | 635.0154 | 3 | 49.04 |
| 18.26    | 14.5 | FSTVAGEK                   | ITRAQ4plex@N-term;<br>ITRAQ4plex(K)@8                                             |                                        | -0.0008 | 1125.6266 | 563.8206 | 1125.6274 | 563.8210 | 2 | 36.51 |
| 18.26    | 14.5 | LAHFNRRERIPER              | ITRAQ4plex@N-term;<br>Oxidation(H)@3; Oxidation(R)@6                              | missed R-E@6; missed R-I@8             | -0.0504 | 1712.8689 | 571.9636 | 1712.9192 | 571.9804 | 3 | 48.52 |
| 18.26    | 14.5 | LFAYPDAHR                  | ITRAQ4plex@N-term                                                                 |                                        | 0.0065  | 1232.6489 | 411.8903 | 1232.6424 | 411.8881 | 3 | 42.72 |
| 18.26    | 14.5 | LTTAGGHPVSNQNH             | ITRAQ4plex@N-term                                                                 | cleaved T-L@N-term; cleaved H-S@C-term | -0.0389 | 1589.7643 | 795.8894 | 1589.8032 | 795.9089 | 2 | 33.17 |
| 18.26    | 14.5 | LTTAGGHPVSNQHS<br>LTAGPR   | ITRAQ4plex@N-term                                                                 | cleaved T-L@N-term                     | -0.0677 | 2272.1118 | 758.3779 | 2272.1794 | 758.4004 | 3 | 36.75 |
| 18.26    | 14.5 | PLKFPDFIHSQK               | ITRAQ4plex@N-term; Pro->pyro-<br>Glu(P)@1; ITRAQ4plex(K)@3;<br>ITRAQ4plex(K)@12   | cleaved D-P@N-term; missed K-F@3       | -0.0467 | 1902.0261 | 635.0160 | 1902.0729 | 635.0316 | 3 | 48.93 |
| 18.26    | 14.5 | TLTTAGGHPVSNQNH            | Carbamyl@N-term                                                                   | cleaved H-S@C-term                     | 0.0082  | 1589.7628 | 795.8887 | 1589.7546 | 795.8846 | 2 | 33.31 |
| 18.26    | 14.5 | TLTTAGGHPVSNQNH<br>SLTAGPR | Carbamyl@N-term                                                                   |                                        | -0.0202 | 2272.1106 | 758.3775 | 2272.1309 | 758.3842 | 3 | 36.69 |
| 18.26    | 14.5 | VGLALSR                    | ITRAQ4plex@N-term                                                                 |                                        | 0.0004  | 858.5413  | 430.2779 | 858.5409  | 430.2777 | 2 | 39.34 |
| LIC12040 |      |                            |                                                                                   |                                        |         |           |          |           |          |   |       |
| 6        | 25.3 | FKDLASPEFPVAK              | ITRAQ4plex@N-term;<br>ITRAQ4plex(K)@2;<br>ITRAQ4plex(K)@13                        |                                        | -0.0151 | 1880.0623 | 627.6947 | 1880.0773 | 627.6997 | 3 | 32.65 |
| 6        | 25.3 | IIRFKDLASPEFPVAK           | No ITRAQ4plex@N-term;<br>ITRAQ4plex(K)@5;<br>ITRAQ4plex(K)@16                     | missed R-F@3                           | -0.0430 | 2118.2017 | 707.0745 | 2118.2445 | 707.0888 | 3 | 30.83 |
| 6        | 25.3 | IMHIALPIGK                 | ITRAQ4plex@N-term;<br>ITRAQ4plex(K)@10                                            |                                        | -0.0051 | 1379.8516 | 690.9330 | 1379.8566 | 690.9356 | 2 | 52.91 |
| 6        | 25.3 | LINP                       | No ITRAQ4plex@N-term;<br>Deamidated(N)@3                                          | cleaved A-L@N-term; cleaved P-H@C-term | 0.0110  | 456.2694  | 457.2766 | 456.2584  | 457.2657 | 1 | 56.48 |
| 6        | 25.3 | LINPHINFNGNAEEAF<br>TFYK   | No ITRAQ4plex@N-term;<br>Deamidated(N)@3;<br>Oxidation(Y)@19;<br>ITRAQ4plex(K)@20 | cleaved A-L@N-term                     | 0.0376  | 2499.2568 | 834.0929 | 2499.2192 | 834.0804 | 3 | 33.03 |



|          |      |      |                               |                                                                                                      |                                                         |         |           |          |           |          |   |       |
|----------|------|------|-------------------------------|------------------------------------------------------------------------------------------------------|---------------------------------------------------------|---------|-----------|----------|-----------|----------|---|-------|
|          | 6    | 25.3 | SVFGGEFAK                     | ITRAQ4plex@N-term;<br>ITRAQ4plex(K)@9                                                                |                                                         | -0.0023 | 1228.6672 | 615.3409 | 1228.6696 | 615.3421 | 2 | 31.28 |
|          | 6    | 25.3 | YNMLMANDVPEAMG<br>R           | ITRAQ4plex@N-term                                                                                    |                                                         | 0.0046  | 1854.8595 | 928.4370 | 1854.8548 | 928.4347 | 2 | 33.01 |
| LIC12075 |      |      |                               |                                                                                                      |                                                         |         |           |          |           |          |   |       |
|          | 5.92 | 17.7 | AVWGEEK                       | ITRAQ4plex@N-term;<br>ITRAQ4plex(K)@7                                                                |                                                         | 0.0054  | 1105.6066 | 553.8105 | 1105.6011 | 553.8078 | 2 | 29.22 |
|          | 5.92 | 17.7 | DLVPPFK                       | ITRAQ4plex@N-term;<br>ITRAQ4plex(K)@7                                                                |                                                         | -0.0069 | 1102.6561 | 552.3353 | 1102.6630 | 552.3388 | 2 | 31.05 |
|          | 5.92 | 17.7 | FIDIGGIK                      | ITRAQ4plex@N-term;<br>ITRAQ4plex(K)@8                                                                |                                                         | 0.0009  | 1149.7010 | 575.8578 | 1149.7001 | 575.8573 | 2 | 32.82 |
|          | 5.92 | 17.7 | FSIYLAINETTSINPEK             | ITRAQ4plex@N-term;<br>ITRAQ4plex(K)@18                                                               |                                                         | 0.0164  | 2340.2983 | 781.1068 | 2340.2820 | 781.1013 | 3 | 56.69 |
|          | 5.92 | 17.7 | GEFLDVMVEMENR                 | ITRAQ4plex@N-term                                                                                    |                                                         | -2.9096 | 1708.8936 | 855.4540 | 1711.8031 | 856.9088 | 2 | 44.26 |
|          | 5.92 | 17.7 | GFDLENTFVINFQNL<br>MPOK       | ITRAQ4plex@N-term;<br>ITRAQ4plex(K)@20                                                               |                                                         | 0.0202  | 2656.3765 | 886.4661 | 2656.3563 | 886.4594 | 3 | 38.39 |
|          | 5.92 | 17.7 | IDIGGIK                       | ITRAQ4plex@N-term;<br>ITRAQ4plex(K)@7                                                                | cleaved F-I@N-term                                      | 0.0092  | 1002.6409 | 502.3277 | 1002.6317 | 502.3231 | 2 | 30.66 |
|          | 5.92 | 17.7 | KDQVLISNFVDQTEEE<br>R         | ITRAQ4plex@N-term;<br>ITRAQ4plex(K)@1                                                                |                                                         | -0.0202 | 2337.1855 | 780.0691 | 2337.2056 | 780.0758 | 3 | 33.62 |
|          | 4.29 | 9.6  | NISFFR                        | ITRAQ4plex@N-term                                                                                    |                                                         | 0.0041  | 926.5137  | 464.2641 | 926.5096  | 464.2621 | 2 | 43.06 |
|          | 4.29 | 9.6  | VVVLIFNPLK                    | ITRAQ4plex@N-term;<br>ITRAQ4plex(K)@10                                                               |                                                         | -1.0696 | 1427.8617 | 714.9381 | 1428.9312 | 715.4729 | 2 | 53.52 |
| LIC12078 |      |      |                               |                                                                                                      |                                                         |         |           |          |           |          |   |       |
|          | 2    | 3.0  | IQLLLK                        | ITRAQ4plex@N-term;<br>ITRAQ4plex(K)@6                                                                | cleaved L-I@N-term                                      | -0.0062 | 1014.6983 | 508.3564 | 1014.7045 | 508.3595 | 2 | 59.44 |
|          | 2    | 3.0  | LDIH                          | ITRAQ4plex@N-term                                                                                    | cleaved N-L@N-term; cleaved H-N@C-term                  | -0.0038 | 640.3628  | 641.3701 | 640.3666  | 641.3739 | 1 | 56.98 |
|          | 2    | 3.0  | NLLYVSGVR                     | ITRAQ4plex@N-term;<br>Oxidation(N)@1; Oxidation(R)@9                                                 |                                                         | 0.0507  | 1195.7190 | 598.8668 | 1195.6683 | 598.8414 | 2 | 43.72 |
|          | 2    | 3.0  | VADIAAAGALLHDLGK              | ITRAQ4plex@N-term;<br>ITRAQ4plex(K)@16                                                               |                                                         | -0.0094 | 1822.0463 | 608.3560 | 1822.0556 | 608.3591 | 3 | 36.25 |
|          | 2    | 3.0  | VELVYLANM                     | ITRAQ4plex@N-term;<br>Deamidated(N)@8                                                                | cleaved L-V@N-term; cleaved M-M@C-term                  | 0.0737  | 1195.7018 | 598.8582 | 1195.6280 | 598.8213 | 2 | 29.31 |
| LIC12084 |      |      |                               |                                                                                                      |                                                         |         |           |          |           |          |   |       |
|          | 1.52 | 3.6  | KSEIPAILSLEK                  | ITRAQ4plex@N-term;<br>ITRAQ4plex(K)@1;<br>ITRAQ4plex(K)@13                                           | missed K-S@1                                            | -0.0101 | 1872.1560 | 625.0593 | 1872.1661 | 625.0626 | 3 | 43.56 |
| LIC12095 |      |      |                               |                                                                                                      |                                                         |         |           |          |           |          |   |       |
|          | 2    | 10.7 | LMPETPTLTAPPEET<br>K          | ITRAQ4plex@N-term;<br>ITRAQ4plex(K)@17                                                               |                                                         | -0.0991 | 2143.0337 | 536.7657 | 2143.1326 | 536.7904 | 4 | 24.85 |
|          | 2    | 10.7 | SETNTQNPDSLTPK                | ITRAQ4plex@N-term;<br>ITRAQ4plex(K)@14                                                               |                                                         | -0.0053 | 1818.9150 | 910.4648 | 1818.9203 | 910.4674 | 2 | 26.21 |
| LIC12112 |      |      |                               |                                                                                                      |                                                         |         |           |          |           |          |   |       |
|          | 2    | 8.0  | IVVENFQLLGSK                  | ITRAQ4plex@N-term;<br>ITRAQ4plex(K)@12                                                               |                                                         | -0.0308 | 1633.9340 | 817.9742 | 1633.9647 | 817.9896 | 2 | 51.22 |
|          | 2    | 8.0  | LKQDTWETPEGK                  | ITRAQ4plex@N-term;<br>ITRAQ4plex(K)@2;<br>ITRAQ4plex(K)@12                                           | missed K-Q@2                                            | -0.0198 | 1862.9906 | 622.0042 | 1863.0103 | 622.0107 | 3 | 30.80 |
|          | 2    | 8.0  | SINGTSLVNFSLANGR<br>TYVSNGEKR | ITRAQ4plex@N-term;<br>Deamidated(N)@9;<br>Deamidated(N)@14;<br>Deamidated(N)@21;<br>ITRAQ4plex(K)@24 | missed R-T@16; missed K-R@24                            | -0.0301 | 2974.4939 | 992.5052 | 2974.5240 | 992.5153 | 3 | 59.23 |
| LIC12166 |      |      |                               |                                                                                                      |                                                         |         |           |          |           |          |   |       |
|          | 4.01 | 7.0  | AAMQR                         | ITRAQ4plex@N-term                                                                                    | cleaved E-A@N-term                                      | 0.0296  | 719.4166  | 720.4239 | 719.3870  | 720.3943 | 1 | 55.36 |
|          | 4.01 | 7.0  | GIYKIGIPTVAGSGAEAS<br>SR      | ITRAQ4plex@N-term;<br>ITRAQ4plex(K)@4                                                                | cleaved P-G@N-term; missed K-I@4                        | 2.9454  | 2137.1443 | 713.3887 | 2134.1990 | 712.4069 | 3 | 39.38 |
|          | 4.01 | 7.0  | IGIPTVAGSGAEASR               | Delta: H(2)C(2)@N-term;<br>Methyl(I)@3                                                               |                                                         | -0.0040 | 1424.7583 | 713.3864 | 1424.7623 | 713.3884 | 2 | 39.28 |
|          | 4.01 | 7.0  | LLFGFNTIDR                    | ITRAQ4plex@N-term                                                                                    |                                                         | -0.0084 | 1338.7334 | 670.3740 | 1338.7418 | 670.3782 | 2 | 35.18 |
|          | 2    | 2.8  | SSLIK                         | No ITRAQ4plex@N-term;<br>ITRAQ4plex(K)@5                                                             | cleaved D-S@N-term                                      | 0.0171  | 690.4569  | 691.4642 | 690.4398  | 691.4471 | 1 | 58.76 |
| LIC12168 |      |      |                               |                                                                                                      |                                                         |         |           |          |           |          |   |       |
|          | 2    | 3.0  | DDLISILSK                     | ITRAQ4plex@N-term;<br>ITRAQ4plex(K)@9                                                                |                                                         | -0.0223 | 1290.7416 | 646.3781 | 1290.7639 | 646.3892 | 2 | 39.98 |
|          | 2    | 3.0  | GRTGA                         | ITRAQ4plex@N-term                                                                                    | cleaved F-G@N-term; cleaved A-T@C-term;<br>missed R-T@2 | 0.0148  | 604.3563  | 605.3635 | 604.3415  | 605.3487 | 1 | 56.30 |
|          | 2    | 3.0  | IALLTEERR                     | ITRAQ4plex@N-term;<br>Phospho(T)@5                                                                   | missed R-R@8                                            | 0.0354  | 1323.7388 | 442.2535 | 1323.7034 | 442.2417 | 3 | 40.92 |
|          | 2    | 3.0  | NVSLADKVPGLR                  | ITRAQ4plex@N-term;<br>ITRAQ4plex(K)@7                                                                | missed K-V@7                                            | 0.0069  | 1555.9358 | 519.6525 | 1555.9290 | 519.6503 | 3 | 31.56 |
| LIC12179 |      |      |                               |                                                                                                      |                                                         |         |           |          |           |          |   |       |
|          | 4    | 9.8  | FTNWAANFLDKPK                 | ITRAQ4plex@N-term;<br>ITRAQ4plex(K)@12;<br>ITRAQ4plex(K)@14                                          |                                                         | -0.0056 | 2096.1729 | 699.7316 | 2096.1784 | 699.7334 | 3 | 36.69 |

|          |       |      |                                                        |                                                                                                                                                 |                                                               |         |           |           |           |           |   |       |
|----------|-------|------|--------------------------------------------------------|-------------------------------------------------------------------------------------------------------------------------------------------------|---------------------------------------------------------------|---------|-----------|-----------|-----------|-----------|---|-------|
|          | 4     | 9.8  | SLVEETLPIISIDLAR                                       | ITRAQ4plex@N-term                                                                                                                               |                                                               | -0.0055 | 2013.1427 | 1007.5790 | 2013.1480 | 1007.5813 | 2 | 39.23 |
|          | 4     | 9.8  | SRLGGESNYTFR                                           | ITRAQ4plex@N-term;<br>Oxidation(R)@2                                                                                                            | missed R-L@2                                                  | 0.1378  | 1545.9036 | 516.3085  | 1545.7658 | 516.2625  | 3 | 44.56 |
| LIC12187 |       |      |                                                        |                                                                                                                                                 |                                                               |         |           |           |           |           |   |       |
|          | 2     | 2.8  | AIPVHMNGR                                              | ITRAQ4plex@N-term;<br>Deamidated(N)@8                                                                                                           |                                                               | 0.0136  | 1251.7017 | 418.2411  | 1251.6880 | 418.2366  | 3 | 42.48 |
|          | 2     | 2.8  | IIPNR                                                  | No ITRAQ4plex@N-term                                                                                                                            | cleaved V-I@N-term                                            | 0.0057  | 611.3812  | 612.3885  | 611.3755  | 612.3828  | 1 | 58.03 |
| LIC12188 |       |      |                                                        |                                                                                                                                                 |                                                               |         |           |           |           |           |   |       |
|          | 3.11  | 3.7  | DLIRSK                                                 | ITRAQ4plex@N-term;<br>ITRAQ4plex(K)@6                                                                                                           | cleaved F-D@N-term; missed R-S@4                              | -0.0135 | 1018.6243 | 510.3194  | 1018.6379 | 510.3262  | 2 | 43.66 |
|          | 3.11  | 3.7  | GIETLPEFFDPNLR                                         | ITRAQ4plex@N-term                                                                                                                               |                                                               | 0.0008  | 1861.9705 | 931.9925  | 1861.9696 | 931.9921  | 2 | 36.57 |
|          | 3.11  | 3.7  | IDTYSPLGHIPVK                                          | ITRAQ4plex@N-term;<br>ITRAQ4plex(K)@13                                                                                                          |                                                               | -0.0136 | 1726.9725 | 576.6648  | 1726.9861 | 576.6693  | 3 | 32.34 |
|          | 3.11  | 3.7  | LGAGS                                                  | ITRAQ4plex@N-term                                                                                                                               | cleaved N-L@N-term; cleaved S-F@C-term                        | 0.0244  | 547.3333  | 548.3405  | 547.3088  | 548.3160  | 1 | 42.24 |
|          | 3.11  | 3.7  | LNLGAGSFVVDIGSND<br>GTLISYFK                           | ITRAQ4plex@N-term;<br>ITRAQ4plex(K)@24                                                                                                          |                                                               | -0.0330 | 2774.4404 | 925.8207  | 2774.4734 | 925.8318  | 3 | 2.38  |
|          | 3.11  | 3.7  | VKAELIQELEK                                            | ITRAQ4plex@N-term;<br>ITRAQ4plex(K)@2;<br>ITRAQ4plex(K)@11                                                                                      | missed K-A@2                                                  | -0.0094 | 1731.0414 | 578.0211  | 1731.0508 | 578.0242  | 3 | 36.06 |
| LIC12193 |       |      |                                                        |                                                                                                                                                 |                                                               |         |           |           |           |           |   |       |
|          | 2     | 4.2  | LGEFFEPITLR                                            | ITRAQ4plex@N-term                                                                                                                               |                                                               | 0.0039  | 1464.8138 | 733.4142  | 1464.8099 | 733.4122  | 2 | 49.36 |
|          | 2     | 4.2  | SESEQQITDEYIR                                          | No ITRAQ4plex@N-term;<br>Oxidation(D)@9                                                                                                         | cleaved L-S@N-term                                            | 0.1110  | 1612.8326 | 807.4236  | 1612.7217 | 807.3681  | 2 | 56.82 |
| LIC12199 |       |      |                                                        |                                                                                                                                                 |                                                               |         |           |           |           |           |   |       |
|          | 2.6   | 4.5  | ISSDK                                                  | ITRAQ4plex@N-term;<br>Oxidation(D)@4;<br>ITRAQ4plex(K)@5                                                                                        | cleaved H-I@N-term                                            | 0.0278  | 852.5075  | 427.2610  | 852.4796  | 427.2471  | 2 | 26.62 |
|          | 2.6   | 4.5  | PATVCGYSR                                              | No ITRAQ4plex@N-term;<br>Methylthio(C)@5                                                                                                        | cleaved R-P@N-term                                            | 0.0139  | 1095.4980 | 548.7563  | 1095.4841 | 548.7493  | 2 | 29.83 |
|          | 2.6   | 4.5  | SINLDAFRPLVEISK                                        | ITRAQ4plex@N-term;<br>ITRAQ4plex(K)@15                                                                                                          |                                                               | -0.0266 | 1989.1238 | 664.0485  | 1989.1502 | 664.0574  | 3 | 36.17 |
|          | 2.6   | 4.5  | VGAMLVPR                                               | No ITRAQ4plex@N-term                                                                                                                            | cleaved Y-V@N-term                                            | 0.0173  | 841.5017  | 421.7581  | 841.4844  | 421.7495  | 2 | 29.56 |
| LIC12210 |       |      |                                                        |                                                                                                                                                 |                                                               |         |           |           |           |           |   |       |
|          | 3.39  | 8.0  | KIQIQTN                                                | ITRAQ4plex@N-term;<br>ITRAQ4plex(K)@1                                                                                                           | missed I-L@1                                                  | -0.0100 | 1131.6755 | 566.8450  | 1131.6855 | 566.8500  | 2 | 36.22 |
| LIC12231 |       |      |                                                        |                                                                                                                                                 |                                                               |         |           |           |           |           |   |       |
|          | 2     | 7.0  | FFEDSAPDLLNKK                                          | ITRAQ4plex@N-term;<br>ITRAQ4plex(K)@12;<br>ITRAQ4plex(K)@13                                                                                     | missed K-K@12                                                 | 0.0121  | 1955.0852 | 652.7023  | 1955.0729 | 652.6983  | 3 | 33.07 |
|          | 2     | 7.0  | IAGGS                                                  | ITRAQ4plex@N-term                                                                                                                               | cleaved T-I@N-term; cleaved S-N@C-term                        | 0.0244  | 547.3333  | 548.3405  | 547.3088  | 548.3160  | 1 | 42.24 |
|          | 2     | 7.0  | IYNGTIAGGSNR                                           | ITRAQ4plex@N-term;<br>Deamidated(N)@11;<br>Deamidated(R)@12                                                                                     |                                                               | 0.0157  | 1367.6960 | 684.8553  | 1367.6803 | 684.8474  | 2 | 33.26 |
|          | 2     | 7.0  | IYNGTIAGGSNRLNDVI<br>QFDSPFSSQTVK                      | ITRAQ4plex@N-term;<br>Deamidated(Q)@25;<br>ITRAQ4plex(T)@26;<br>ITRAQ4plex(K)@28                                                                | missed R-L@12                                                 | 0.0043  | 3473.8201 | 869.4623  | 3473.8156 | 869.4612  | 4 | 47.03 |
|          | 2     | 7.0  | IYNGTIAGGSNRLNDVI<br>QFDSPFSSQTVKSDTL<br>PEKGLYLKITEQR | ITRAQ4plex@N-term;<br>Deamidated(N)@14;<br>Deamidated(Q)@18;<br>Deamidated(Q)@25;<br>ITRAQ4plex(K)@28;<br>ITRAQ4plex(K)@35;<br>ITRAQ4plex(K)@40 | missed R-L@12; missed K-S@28; missed K<br>G@35; missed K-I@40 | -0.2057 | 5704.8271 | 951.8118  | 5705.0327 | 951.8461  | 6 | 58.63 |
| LIC12232 |       |      |                                                        |                                                                                                                                                 |                                                               |         |           |           |           |           |   |       |
|          | 2.01  | 2.5  | ASTFVK                                                 | ITRAQ4plex@N-term;<br>ITRAQ4plex(K)@6                                                                                                           | cleaved T-A@N-term                                            | -0.0053 | 939.5580  | 470.7863  | 939.5633  | 470.7889  | 2 | 34.75 |
|          | 2.01  | 2.5  | EFHPETASTFVK                                           | ITRAQ4plex@N-term;<br>ITRAQ4plex(K)@12                                                                                                          |                                                               | 0.0081  | 1679.8844 | 560.9688  | 1679.8763 | 560.9660  | 3 | 30.22 |
|          | 2.01  | 2.5  | LMNSYDVPNEQR                                           | No ITRAQ4plex@N-term                                                                                                                            |                                                               | 0.0741  | 1464.7408 | 489.2542  | 1464.6667 | 489.2295  | 3 | 26.17 |
|          | 2.01  | 2.5  | RLMNSYDVPNEQR                                          | ITRAQ4plex@N-term;<br>Deamidated(N)@10                                                                                                          | cleaved Y-R@N-term; missed R-L@1                              | 0.0473  | 1765.9012 | 883.9579  | 1765.8539 | 883.9342  | 2 | 32.38 |
|          | 2.01  | 2.5  | SILGIPKSILNDQDAIDL<br>VLNPAK                           | ITRAQ4plex@N-term;<br>ITRAQ4plex(K)@7;<br>Deamidated(N)@21;<br>ITRAQ4plex(K)@24                                                                 | missed K-S@7                                                  | -0.2762 | 2979.4460 | 994.1559  | 2979.7222 | 994.2480  | 3 | 49.47 |
|          | 2.01  | 2.5  | SILNDQDAIDLVLNLP                                       | ITRAQ4plex@N-term;<br>Oxidation(N)@14                                                                                                           | cleaved P-A@C-term                                            | -0.0503 | 1798.8932 | 900.4539  | 1798.9434 | 900.4790  | 2 | 47.96 |
|          | 2.01  | 2.5  | SILNDQDAIDLVLNPAK                                      | ITRAQ4plex@N-term;<br>Deamidated(N)@4;<br>Oxidation(P)@15;<br>ITRAQ4plex(K)@17                                                                  |                                                               | 0.0203  | 2143.1819 | 715.4012  | 2143.1616 | 715.3945  | 3 | 49.09 |
| LIC12233 |       |      |                                                        |                                                                                                                                                 |                                                               |         |           |           |           |           |   |       |
|          | 18.24 | 33.9 | AGGMGLISGR                                             | No ITRAQ4plex@N-term                                                                                                                            |                                                               | -0.0034 | 917.4719  | 459.7432  | 917.4753  | 459.7449  | 2 | 28.83 |

|          |       |      |                                |                                                                                                   |                                   |         |           |           |           |           |   |       |
|----------|-------|------|--------------------------------|---------------------------------------------------------------------------------------------------|-----------------------------------|---------|-----------|-----------|-----------|-----------|---|-------|
|          | 18.24 | 33.9 | DGVALLNAIQDVYLSK               | ITRAQ4plex@N-term;<br>ITRAQ4plex(K)@16                                                            |                                   | -0.0052 | 2006.1240 | 669.7153  | 2006.1292 | 669.7170  | 3 | 38.70 |
|          | 18.24 | 33.9 | ESLSLPGANYVDEVLSK              | ITRAQ4plex@N-term;<br>ITRAQ4plex(K)@17                                                            |                                   | -0.0002 | 2108.1243 | 1055.0690 | 2108.1245 | 1055.0695 | 2 | 36.42 |
|          | 18.24 | 33.9 | INHNELLSYPNK                   | ITRAQ4plex@N-term;<br>Deamidated(N)@2;<br>Deamidated(N)@4;<br>Oxidation(Y)@9;<br>ITRAQ4plex(K)@12 |                                   | 0.0286  | 1746.9318 | 583.3179  | 1746.9032 | 583.3083  | 3 | 35.91 |
|          | 18.24 | 33.9 | IPFIVK                         | ITRAQ4plex@N-term;<br>ITRAQ4plex(K)@6                                                             |                                   | -0.0058 | 1003.6616 | 502.8380  | 1003.6674 | 502.8410  | 2 | 32.90 |
|          | 18.24 | 33.9 | LAGTGYTSILPVDQGI<br>EHSAGASFAK | ITRAQ4plex@N-term;<br>Methyl(L)@10; Oxidation(F)@24;<br>ITRAQ4plex(K)@26                          |                                   | 0.0936  | 2907.6157 | 485.6099  | 2907.5222 | 485.5943  | 6 | 44.08 |
|          | 18.24 | 33.9 | LAIEGGCNAVASTLGV<br>LGLVSR     | ITRAQ4plex@N-term;<br>Methylthio(C)@7                                                             |                                   | -0.0290 | 2289.2017 | 764.0745  | 2289.2307 | 764.0842  | 3 | 49.20 |
|          | 18.24 | 33.9 | LPEVFAGGFK                     | ITRAQ4plex@N-term;<br>ITRAQ4plex(K)@10                                                            |                                   | -0.0085 | 1351.7659 | 676.8902  | 1351.7744 | 676.8945  | 2 | 34.38 |
|          | 12.43 | 16.8 | LVSARK                         | ITRAQ4plex@N-term;<br>Deamidated(R)@4;<br>ITRAQ4plex(K)@5                                         | cleaved G-L@N-term; missed R-K@4  | 0.0243  | 890.6036  | 446.3091  | 890.5793  | 446.2969  | 2 | 42.48 |
|          | 18.24 | 33.9 | MYTQLTADNPIDMAR                | ITRAQ4plex@N-term;<br>Oxidation(M)@1                                                              |                                   | 0.0002  | 1898.8990 | 950.4568  | 1898.8988 | 950.4567  | 2 | 31.75 |
|          | 18.24 | 33.9 | NYQAILNTGR                     | ITRAQ4plex@N-term                                                                                 |                                   | -0.0220 | 1292.6740 | 647.3442  | 1292.6959 | 647.3552  | 2 | 29.30 |
|          | 18.24 | 33.9 | NYQAILNTGRLAGTGY<br>TSILP      | ITRAQ4plex@N-term;<br>Oxidation(R)@10                                                             | cleaved P-V@C-term; missed R-L@10 | 0.0179  | 2382.2844 | 795.1021  | 2382.2665 | 795.0961  | 3 | 37.01 |
|          | 18.24 | 33.9 | QIQEISDAFHR                    | Gln->pyro-Glu@N-term                                                                              |                                   | -0.0023 | 1325.6342 | 663.8243  | 1325.6364 | 663.8255  | 2 | 34.87 |
|          | 18.24 | 33.9 | QKLPEVFAGGFK                   | ITRAQ4plex@N-term;<br>ITRAQ4plex(K)@2;<br>ITRAQ4plex(K)@12                                        | missed K-L@2                      | -0.0079 | 1752.0221 | 585.0146  | 1752.0300 | 585.0173  | 3 | 35.05 |
|          | 18.24 | 33.9 | TALGAEADSLNHTCK                | ITRAQ4plex@N-term;<br>Methylthio(C)@15;<br>ITRAQ4plex(K)@16                                       |                                   | 0.0023  | 1976.9927 | 660.0048  | 1976.9903 | 660.0040  | 3 | 34.59 |
|          | 18.24 | 33.9 | TSILPVDQGIHSAGA<br>SFAK        | ITRAQ4plex@N-term;<br>Oxidation(H)@12;<br>ITRAQ4plex(K)@20                                        | cleaved Y-T@N-term                | 0.0976  | 2331.3291 | 778.1169  | 2331.2314 | 778.0844  | 3 | 40.66 |
|          | 18.24 | 33.9 | VFAGGFK                        | ITRAQ4plex@N-term;<br>ITRAQ4plex(K)@7                                                             | cleaved E-V@N-term                | 0.0005  | 1012.5955 | 507.3050  | 1012.5949 | 507.3047  | 2 | 43.31 |
| LIC12247 |       |      |                                |                                                                                                   |                                   |         |           |           |           |           |   |       |
|          | 3.7   | 11.1 | FYDLNKEEK                      | ITRAQ4plex@N-term;<br>ITRAQ4plex(K)@6;<br>ITRAQ4plex(K)@9                                         |                                   | -0.0342 | 1616.8434 | 539.9551  | 1616.8775 | 539.9665  | 3 | 31.11 |
|          | 3.7   | 11.1 | MNVATSHITWSIPMAN<br>NK         | ITRAQ4plex@N-term;<br>Phospho(S)@11;<br>ITRAQ4plex(K)@18                                          |                                   | 0.1030  | 2382.2500 | 795.0906  | 2382.1469 | 795.0562  | 3 | 19.53 |
|          | 3.7   | 11.1 | VATSLNPLGK                     | ITRAQ4plex@N-term;<br>ITRAQ4plex(K)@10                                                            |                                   | -1.0854 | 1285.6948 | 643.8547  | 1286.7802 | 644.3974  | 2 | 29.72 |
| LIC12263 |       |      |                                |                                                                                                   |                                   |         |           |           |           |           |   |       |
|          | 5.54  | 10.6 | ETITDYEKVRNTLINYI<br>DNDLLQR   | Glu->pyro-Glu@N-term;<br>ITRAQ4plex(K)@8;<br>Deamidated(N)@15;<br>Deamidated(N)@19                | missed K-V@8; missed R-N@10       | -0.2044 | 3066.3589 | 767.5970  | 3066.5631 | 767.6481  | 4 | 45.86 |
|          | 5.54  | 10.6 | ETLPPPIPTK                     | ITRAQ4plex@N-term;<br>ITRAQ4plex(K)@9                                                             |                                   | 0.0002  | 1282.7743 | 642.3944  | 1282.7740 | 642.3943  | 2 | 29.42 |
|          | 3.95  | 6.3  | IAQHLLR                        | ITRAQ4plex@N-term                                                                                 |                                   | -0.0049 | 993.6157  | 497.8151  | 993.6205  | 497.8175  | 2 | 43.12 |
|          | 5.54  | 10.6 | IGENK                          | ITRAQ4plex@N-term;<br>ITRAQ4plex(K)@5                                                             | cleaved L-I@N-term                | 0.0044  | 847.5051  | 424.7598  | 847.5007  | 424.7576  | 2 | 23.51 |
|          | 5.54  | 10.6 | ILLEYASPLIVR                   | ITRAQ4plex@N-term                                                                                 |                                   | -0.0048 | 1529.9255 | 765.9700  | 1529.9303 | 765.9724  | 2 | 36.15 |
|          | 3.95  | 6.3  | LGALP                          | ITRAQ4plex@N-term                                                                                 | cleaved P-S@C-term                | -0.0002 | 613.3919  | 614.3992  | 613.3921  | 614.3994  | 1 | 50.66 |
|          | 3.95  | 6.3  | LGALPSYISLK                    | ITRAQ4plex@N-term;<br>ITRAQ4plex(K)@11                                                            |                                   | -0.0344 | 1448.8502 | 725.4324  | 1448.8846 | 725.4496  | 2 | 45.76 |
|          | 3.95  | 6.3  | LLHGEQIK                       | ITRAQ4plex@N-term;<br>ITRAQ4plex(K)@9                                                             |                                   | -0.0064 | 1266.7841 | 423.2686  | 1266.7903 | 423.2707  | 3 | 44.76 |
|          | 5.54  | 10.6 | NTLINYIDNDLLQR                 | ITRAQ4plex@N-term                                                                                 |                                   | 0.0093  | 1847.9956 | 617.0058  | 1847.9863 | 617.0027  | 3 | 36.99 |
|          | 5.54  | 10.6 | SLSFK                          | ITRAQ4plex@N-term;<br>ITRAQ4plex(K)@5                                                             | cleaved Y-S@N-term                | -0.0043 | 868.5219  | 435.2682  | 868.5262  | 435.2704  | 2 | 34.43 |
| LIC12277 |       |      |                                |                                                                                                   |                                   |         |           |           |           |           |   |       |
|          | 2.66  | 4.5  | EETNVYKEEPK                    | ITRAQ4plex@N-term;<br>ITRAQ4plex(K)@7;<br>ITRAQ4plex(K)@11                                        |                                   | -0.0311 | 1796.9210 | 599.9810  | 1796.9522 | 599.9913  | 3 | 28.59 |
|          | 2.66  | 4.5  | LREETNNYK                      | ITRAQ4plex@N-term;<br>Deamidated(N)@6;<br>ITRAQ4plex(K)@9                                         | missed R-E@2                      | -0.0337 | 1454.7272 | 485.9163  | 1454.7609 | 485.9276  | 3 | 27.97 |
| LIC12311 |       |      |                                |                                                                                                   |                                   |         |           |           |           |           |   |       |
|          | 2     | 12.2 | MILRINLSR                      | No ITRAQ4plex@N-term;<br>Oxidation(R)@4                                                           | missed R-I@4                      | 0.0260  | 1244.7284 | 415.9167  | 1244.7023 | 415.9081  | 3 | 27.97 |

|          |       |      |                                 |                                                                                                   |                                                         |         |           |           |           |           |   |       |
|----------|-------|------|---------------------------------|---------------------------------------------------------------------------------------------------|---------------------------------------------------------|---------|-----------|-----------|-----------|-----------|---|-------|
|          | 2     | 12.2 | SLINEPELLADEPSG<br>DLDPENSELVR  | ITRAQ4plex@N-term                                                                                 |                                                         | -0.0122 | 3107.5508 | 1036.8580 | 3107.5632 | 1036.8617 | 3 | 37.82 |
| LIC12320 |       |      |                                 |                                                                                                   |                                                         |         |           |           |           |           |   |       |
|          | 2     | 4.7  | SAALEYAKK                       | ITRAQ4plex@N-term;<br>Oxidation(Y)@6;<br>ITRAQ4plex(K)@8;<br>ITRAQ4plex(K)@9                      | missed K-K@8                                            | -0.0073 | 1427.8278 | 714.9211  | 1427.8349 | 714.9248  | 2 | 49.12 |
|          | 2     | 4.7  | TEILDELFLAK                     | ITRAQ4plex@N-term;<br>ITRAQ4plex(K)@12                                                            |                                                         | -0.0165 | 1715.9536 | 572.9918  | 1715.9702 | 572.9973  | 3 | 39.51 |
| LIC12321 |       |      |                                 |                                                                                                   |                                                         |         |           |           |           |           |   |       |
|          | 1.52  | 3.5  | DIYGK                           | ITRAQ4plex@N-term;<br>ITRAQ4plex(K)@5                                                             | cleaved T-D@N-term                                      | -0.0015 | 882.5040  | 442.2592  | 882.5055  | 442.2600  | 2 | 26.59 |
|          | 1.52  | 3.5  | IDSIESELSLEIINK                 | No ITRAQ4plex@N-term;<br>ITRAQ4plex(K)@16                                                         |                                                         | 0.0504  | 1961.0830 | 654.7016  | 1961.0327 | 654.6848  | 3 | 47.19 |
|          | 1.52  | 3.5  | YLLVLLQDLK                      | ITRAQ4plex@N-term;<br>ITRAQ4plex(K)@10                                                            |                                                         | -0.0209 | 1504.9264 | 753.4705  | 1504.9472 | 753.4809  | 2 | 1.47  |
| LIC12323 |       |      |                                 |                                                                                                   |                                                         |         |           |           |           |           |   |       |
|          | 2     | 5.9  | AEKAVIGNIGVNER                  | ITRAQ4plex@N-term;<br>ITRAQ4plex(K)@3                                                             | cleaved P-A@N-term; missed K-A@3                        | 0.0027  | 1757.0066 | 586.6761  | 1757.0039 | 586.6752  | 3 | 49.89 |
|          | 2     | 5.9  | FPEMHPAEK                       | ITRAQ4plex@N-term;<br>Oxidation(P)@2;<br>ITRAQ4plex(K)@9                                          |                                                         | 0.1067  | 1388.8069 | 463.9429  | 1388.7002 | 463.9073  | 3 | 42.30 |
|          | 2     | 5.9  | GSERF                           | No ITRAQ4plex@N-term                                                                              | cleaved I-G@N-term; cleaved F-S@C-term;<br>missed R-F@4 | 0.0486  | 594.3248  | 595.3320  | 594.2762  | 595.2835  | 1 | 50.79 |
|          | 2     | 5.9  | GTDVVVQDVLK                     | ITRAQ4plex@N-term;<br>Oxidation(D)@3;<br>ITRAQ4plex(K)@11                                         | cleaved P-G@N-term                                      | 0.0012  | 1475.8451 | 492.9556  | 1475.8439 | 492.9552  | 3 | 45.39 |
|          | 2     | 5.9  | VGNTSAASIPVLSEYY<br>YK          | ITRAQ4plex@N-term;<br>ITRAQ4plex(K)@19                                                            |                                                         | -0.0369 | 2362.2295 | 788.4171  | 2362.2664 | 788.4294  | 3 | 35.60 |
| LIC12324 |       |      |                                 |                                                                                                   |                                                         |         |           |           |           |           |   |       |
|          | 14.08 | 5.8  | DDLQWADTPSLELVK                 | ITRAQ4plex@N-term;<br>Deamidated(Q)@4;<br>ITRAQ4plex(K)@15                                        | cleaved L-D@N-term                                      | 0.0366  | 2018.0817 | 673.7012  | 2018.0452 | 673.6890  | 3 | 32.31 |
|          | 14.08 | 5.8  | DLKPDNIIFNPDENILR               | ITRAQ4plex@N-term;<br>ITRAQ4plex(K)@3                                                             |                                                         | -0.0101 | 2313.2471 | 772.0897  | 2313.2572 | 772.0930  | 3 | 34.85 |
|          | 14.08 | 5.8  | EINKPLTESK                      | ITRAQ4plex@N-term;<br>ITRAQ4plex(K)@4;<br>ITRAQ4plex(K)@10                                        |                                                         | -0.0354 | 1589.9000 | 530.9739  | 1589.9354 | 530.9857  | 3 | 29.01 |
|          | 14.08 | 5.8  | ELEEAK                          | ITRAQ4plex@N-term;<br>ITRAQ4plex(K)@6                                                             |                                                         | 0.0536  | 1005.6122 | 503.8134  | 1005.5586 | 503.7866  | 2 | 59.42 |
|          | 14.08 | 5.8  | EVSRTYSTHEVK                    | ITRAQ4plex@N-term;<br>ITRAQ4plex(S)@3;<br>ITRAQ4plex(K)@12                                        | missed R-T@4                                            | 0.0390  | 1867.0554 | 623.3591  | 1867.0165 | 623.3461  | 3 | 44.04 |
|          | 14.08 | 5.8  | FDQYNRNVPF                      | ITRAQ4plex@N-term;<br>Deamidated(Q)@3;<br>Deamidated(N)@5;<br>Deamidated(N)@7                     | cleaved F-S@C-term; missed R-N@6                        | 0.0842  | 1445.7428 | 723.8787  | 1445.6585 | 723.8365  | 2 | 55.88 |
|          | 14.08 | 5.8  | GSISK                           | No ITRAQ4plex@N-term;<br>ITRAQ4plex(K)@5                                                          | cleaved E-G@N-term                                      | 0.0162  | 634.3934  | 635.4007  | 634.3772  | 635.3845  | 1 | 54.88 |
|          | 14.08 | 5.8  | GTGLLR                          | ITRAQ4plex@N-term                                                                                 |                                                         | -0.0087 | 759.4637  | 760.4710  | 759.4725  | 760.4797  | 1 | 56.94 |
|          | 14.08 | 5.8  | ILLKPLSLENVNELLS<br>SLR         | ITRAQ4plex@N-term;<br>ITRAQ4plex(K)@4                                                             |                                                         | -1.0945 | 2552.4041 | 851.8086  | 2553.4985 | 852.1735  | 3 | 41.02 |
|          | 14.08 | 5.8  | LGATLK                          | ITRAQ4plex@N-term;<br>ITRAQ4plex(K)@6                                                             | cleaved I-L@N-term                                      | -0.0389 | 889.5452  | 445.7798  | 889.5840  | 445.7993  | 2 | 27.69 |
|          | 14.08 | 5.8  | LGTTLILSNLR                     | ITRAQ4plex@N-term;<br>Deamidated(N)@9;<br>Deamidated(R)@11                                        | cleaved I-L@N-term                                      | -0.0543 | 1345.7396 | 673.8771  | 1345.7939 | 673.9042  | 2 | 33.99 |
|          | 14.08 | 5.8  | LLQLNLQAAQK                     | Methylthio@N-term;<br>Deamidated(N)@5;<br>ITRAQ4plex(K)@11                                        |                                                         | 0.0022  | 1429.8107 | 477.6108  | 1429.8085 | 477.6101  | 3 | 26.33 |
|          | 14.08 | 5.8  | LPSDDLAK                        | ITRAQ4plex@N-term;<br>ITRAQ4plex(K)@9                                                             | cleaved I-L@N-term                                      | 0.0242  | 1258.7618 | 630.3882  | 1258.7376 | 630.3761  | 2 | 31.82 |
|          | 14.08 | 5.8  | LQIMNILSSQAAISI                 | ITRAQ4plex@N-term                                                                                 | cleaved I-D@C-term                                      | -0.0062 | 1744.9817 | 873.4981  | 1744.9879 | 873.5012  | 2 | 34.70 |
|          | 14.08 | 5.8  | LQNVLSLPAYEQK                   | ITRAQ4plex@N-term;<br>Deamidated(Q)@2;<br>Deamidated(N)@3;<br>Oxidation(P)@8;<br>ITRAQ4plex(K)@13 |                                                         | 0.0082  | 1807.9893 | 603.6703  | 1807.9811 | 603.6676  | 3 | 58.33 |
|          | 14.08 | 5.8  | NLPISLIYVER                     | ITRAQ4plex@N-term                                                                                 |                                                         | -0.0078 | 1622.9076 | 812.4611  | 1622.9154 | 812.4650  | 2 | 37.10 |
|          | 14.08 | 5.8  | NQLAALFDEYQAGEA<br>QRDDITLIGFRV | ITRAQ4plex@N-term;<br>Deamidated(N)@1;<br>Oxidation(Y)@10;<br>Deamidated(Q)@16                    | missed R-D@17; missed R-V@26                            | 0.1396  | 3214.7300 | 536.7956  | 3214.5904 | 536.7723  | 6 | 59.11 |
|          | 14.08 | 5.8  | QAAQKAK                         | Gln->pyro-Glu@N-term;<br>Deamidated(Q)@4;<br>ITRAQ4plex(K)@5;<br>ITRAQ4plex(K)@7                  | cleaved L-Q@N-term; missed K-A@5                        | -0.0028 | 1015.5878 | 508.8012  | 1015.5906 | 508.8026  | 2 | 29.53 |

|          |       |      |                                     |                                                                                                                             |                                        |         |           |          |           |          |   |       |
|----------|-------|------|-------------------------------------|-----------------------------------------------------------------------------------------------------------------------------|----------------------------------------|---------|-----------|----------|-----------|----------|---|-------|
|          | 14.08 | 5.8  | SGQTLDLQSVLK                        | No iTRAQ4plex@N-term;<br>iTRAQ4plex(K)@12                                                                                   | cleaved Y-S@N-term                     | 0.0469  | 1431.8524 | 716.9335 | 1431.8055 | 716.9100 | 2 | 30.94 |
|          | 14.08 | 5.8  | TLIGFR                              | iTRAQ4plex@N-term                                                                                                           | cleaved I-T@N-term                     | -0.0395 | 849.4799  | 425.7472 | 849.5194  | 425.7670 | 2 | 30.56 |
|          | 14.08 | 5.8  | VITDVLPELEFIIGEQP<br>PVTELG PQENANR | iTRAQ4plex@N-term                                                                                                           |                                        | -0.1709 | 3460.6504 | 866.1699 | 3460.8211 | 866.2126 | 4 | 42.46 |
|          | 14.08 | 5.8  | YGLWGANLK                           | iTRAQ4plex@N-term;<br>iTRAQ4plex(K)@9                                                                                       |                                        | -1.0681 | 1307.6753 | 654.8449 | 1308.7434 | 655.3790 | 2 | 32.59 |
| LIC12325 |       |      |                                     |                                                                                                                             |                                        |         |           |          |           |          |   |       |
|          | 2.03  | 8.7  | KSDGPLSFNISPIDDK                    | iTRAQ4plex@N-term;<br>iTRAQ4plex(K)@1;<br>iTRAQ4plex(K)@16                                                                  | missed K-S@1                           | 0.0050  | 2164.1792 | 722.4003 | 2164.1741 | 722.3986 | 3 | 35.22 |
|          | 2.03  | 8.7  | LSQEVLT EFGSMIR                     | No iTRAQ4plex@N-term;<br>Deamidated(R)@14                                                                                   |                                        | 0.0945  | 1609.8967 | 805.9556 | 1609.8022 | 805.9084 | 2 | 51.53 |
|          | 2.03  | 8.7  | QLRSNRPEDSK                         | iTRAQ4plex@N-term;<br>Deamidated(Q)@1;<br>Deamidated(R)@6;<br>Oxidation(F)@7;<br>iTRAQ4plex(K)@11                           | missed R-S@3                           | -0.0490 | 1634.7979 | 545.9399 | 1634.8467 | 545.9562 | 3 | 49.03 |
|          | 2.03  | 8.7  | SLDLFK                              | iTRAQ4plex@N-term;<br>iTRAQ4plex(K)@6                                                                                       |                                        | 0.0205  | 1009.6257 | 505.8201 | 1009.6052 | 505.8099 | 2 | 46.23 |
| LIC12326 |       |      |                                     |                                                                                                                             |                                        |         |           |          |           |          |   |       |
|          | 4     | 21.0 | VIMDILDSLQK                         | iTRAQ4plex@N-term;<br>iTRAQ4plex(K)@11                                                                                      |                                        | -0.9986 | 1560.9008 | 781.4576 | 1561.8993 | 781.9569 | 2 | 48.86 |
|          | 4     | 21.0 | YKPVFDWLNAMNSK                      | iTRAQ4plex@N-term;<br>iTRAQ4plex(K)@2;<br>iTRAQ4plex(K)@15                                                                  | cleaved F-Y@N-term                     | 0.0086  | 2215.1912 | 739.4043 | 2215.1825 | 739.4014 | 3 | 39.87 |
| LIC12341 |       |      |                                     |                                                                                                                             |                                        |         |           |          |           |          |   |       |
|          | 2.63  | 3.7  | AIALIHVK                            | iTRAQ4plex@N-term;<br>iTRAQ4plex(K)@8                                                                                       |                                        | -0.0044 | 1151.7590 | 576.8868 | 1151.7634 | 576.8890 | 2 | 48.71 |
|          | 2.63  | 3.7  | AIALIHKQFSNQLLKS<br>SGK             | No iTRAQ4plex@N-term;<br>iTRAQ4plex(K)@8;<br>Deamidated(Q)@9;<br>Deamidated(Q)@13;<br>iTRAQ4plex(K)@16;<br>iTRAQ4plex(K)@20 | missed K-Q@8; missed K-S@16            | 0.1008  | 2615.6384 | 654.9169 | 2615.5376 | 654.8917 | 4 | 49.72 |
|          | 2.63  | 3.7  | IALIK                               | iTRAQ4plex@N-term;<br>iTRAQ4plex(K)@5                                                                                       | cleaved T-I@N-term                     | 0.0125  | 844.6115  | 423.3130 | 844.5990  | 423.3068 | 2 | 42.63 |
|          | 2     | 5.0  | IDINYEKPIK                          | iTRAQ4plex@N-term;<br>iTRAQ4plex(K)@7;<br>iTRAQ4plex(K)@11                                                                  |                                        | 0.0001  | 1777.0717 | 593.3645 | 1777.0715 | 593.3644 | 3 | 32.73 |
|          | 2     | 5.0  | INYEK                               | No iTRAQ4plex@N-term;<br>iTRAQ4plex(K)@5                                                                                    | cleaved D-I@N-term; cleaved K-P@C-term | 0.0530  | 809.4935  | 405.7540 | 809.4405  | 405.7275 | 2 | 32.84 |
| LIC12349 |       |      |                                     |                                                                                                                             |                                        |         |           |          |           |          |   |       |
|          | 2     | 1.9  | FIDPNLPNEVK                         | iTRAQ4plex@N-term;<br>Oxidation(P)@4;<br>Deamidated(N)@5;<br>iTRAQ4plex(K)@11                                               | cleaved Y-F@N-term                     | 0.0092  | 1589.8636 | 795.9391 | 1589.8545 | 795.9345 | 2 | 38.05 |
|          | 2     | 1.9  | FLATS                               | iTRAQ4plex@N-term                                                                                                           | cleaved L-F@N-term; cleaved S-F@C-term | 0.0320  | 681.4139  | 682.4212 | 681.3819  | 682.3892 | 1 | 55.75 |
|          | 2     | 1.9  | ITSSVIPILIFL                        | No iTRAQ4plex@N-term                                                                                                        | cleaved L-G@C-term                     | 0.0327  | 1314.8490 | 439.2903 | 1314.8163 | 439.2794 | 3 | 32.01 |
|          | 2     | 1.9  | LEYGQIGILEDSFLYFF<br>SVLIAGDTLLSR   | iTRAQ4plex@N-term;<br>Oxidation(Y)@3;<br>Oxidation(F)@17                                                                    |                                        | -0.0883 | 3454.7151 | 864.6860 | 3454.8034 | 864.7081 | 4 | 46.97 |
|          | 2     | 1.9  | LGVLFAFPK                           | iTRAQ4plex@N-term;<br>iTRAQ4plex(K)@9                                                                                       | cleaved P-L@N-term                     | 0.0120  | 1278.8064 | 640.4105 | 1278.7944 | 640.4045 | 2 | 39.41 |
|          | 2     | 1.9  | LVSHSYFLK                           | iTRAQ4plex@N-term;<br>iTRAQ4plex(K)@9                                                                                       | cleaved I-L@N-term                     | -0.0001 | 1380.8008 | 691.4077 | 1380.8009 | 691.4077 | 2 | 33.48 |
|          | 2     | 1.9  | VPEDKPAEEGR                         | iTRAQ4plex@N-term;<br>iTRAQ4plex(K)@5                                                                                       |                                        | 0.0067  | 1513.8047 | 505.6089 | 1513.7980 | 505.6066 | 3 | 25.76 |
| LIC12371 |       |      |                                     |                                                                                                                             |                                        |         |           |          |           |          |   |       |
|          | 2     | 10.7 | FLAQDENDKPOGMYA<br>K                | iTRAQ4plex@N-term;<br>iTRAQ4plex(K)@9;<br>iTRAQ4plex(K)@16                                                                  |                                        | 0.0027  | 2286.1709 | 763.0642 | 2286.1680 | 763.0633 | 3 | 30.25 |
| LIC12392 |       |      |                                     |                                                                                                                             |                                        |         |           |          |           |          |   |       |
|          | 2.93  | 2.2  | DMVHSIGGAPLTCGS<br>K                | iTRAQ4plex@N-term;<br>Methylthio(C)@13;<br>iTRAQ4plex(K)@16                                                                 |                                        | 0.0665  | 1906.0020 | 636.3412 | 1905.9354 | 636.3191 | 3 | 44.41 |
|          | 2.93  | 2.2  | LIHPIELVESAIOR                      | Carbamyl@N-term                                                                                                             |                                        | 0.0063  | 1659.9371 | 830.9758 | 1659.9308 | 830.9727 | 2 | 52.21 |
|          | 2.93  | 2.2  | LPLGLLFTAAR                         | iTRAQ4plex@N-term                                                                                                           |                                        | -0.0064 | 1314.8081 | 658.4113 | 1314.8145 | 658.4145 | 2 | 51.99 |
| LIC12397 |       |      |                                     |                                                                                                                             |                                        |         |           |          |           |          |   |       |
|          | 4.01  | 5.2  | GAGSTRSGASSAR                       | iTRAQ4plex@N-term                                                                                                           | missed R-S@6                           | -0.0260 | 1307.6405 | 654.8275 | 1307.6664 | 654.8405 | 2 | 29.48 |
|          | 4.01  | 5.2  | GAGSTRSGASSARG<br>GSVSK             | iTRAQ4plex@N-term; No<br>iTRAQ4plex(K)@19                                                                                   | missed R-S@6; missed R-G@13            | 0.0436  | 1822.9802 | 608.6674 | 1822.9367 | 608.6529 | 3 | 27.72 |
|          | 4.01  | 5.2  | KEENNPEDSL                          | iTRAQ4plex@N-term;<br>iTRAQ4plex(K)@1;<br>Deamidated(N)@5;<br>Phospho(S)@9                                                  | cleaved L-S@C-term                     | 0.1069  | 1542.7764 | 772.3954 | 1542.6694 | 772.3420 | 2 | 23.06 |

|          |      |                                  |                                                                                                                           |                                                         |         |           |           |           |           |   |       |
|----------|------|----------------------------------|---------------------------------------------------------------------------------------------------------------------------|---------------------------------------------------------|---------|-----------|-----------|-----------|-----------|---|-------|
| 4.01     | 5.2  | KEESASGRQPNIRQG<br>QR            | ITRAQ4plex@N-term;<br>ITRAQ4plex(K)@1;<br>Deamidated(N)@11;<br>Deamidated(Q)@14;<br>Deamidated(Q)@16;<br>Deamidated(R)@17 | missed R-Q@8; missed R-Q@13                             | -0.0575 | 2232.0764 | 745.0327  | 2232.1338 | 745.0519  | 3 | 23.35 |
| 4.01     | 5.2  | LENGDLFGGVTELSPE<br>EEMEK        | ITRAQ4plex@N-term;<br>Deamidated(N)@3;<br>Oxidation(F)@7;<br>ITRAQ4plex(K)@20                                             |                                                         | 0.0574  | 2498.2554 | 833.7590  | 2498.1978 | 833.7399  | 3 | 33.01 |
| 4.01     | 5.2  | LSVRLK                           | ITRAQ4plex@N-term;<br>Deamidated(R)@4;<br>ITRAQ4plex(K)@6                                                                 | missed R-L@4                                            | -0.0023 | 1003.6610 | 502.8378  | 1003.6633 | 502.8390  | 2 | 36.18 |
| 4.01     | 5.2  | MHKIYDNEEVNQIIEP<br>HNAAPDLPAISR | ITRAQ4plex@N-term;<br>ITRAQ4plex(K)@3;<br>Oxidation(N)@7;<br>Deamidated(N)@11                                             | missed K-I@3                                            | 0.1114  | 3617.9507 | 905.4949  | 3617.8392 | 905.4671  | 4 | 49.03 |
| 4.01     | 5.2  | NLSGK                            | No ITRAQ4plex@N-term;<br>ITRAQ4plex(K)@5                                                                                  | cleaved F-N@N-term                                      | 0.0105  | 661.3986  | 662.4059  | 661.3881  | 662.3954  | 1 | 55.90 |
| 4.01     | 5.2  | NMAEFDK                          | ITRAQ4plex@N-term;<br>Deamidated(N)@1;<br>ITRAQ4plex(K)@7                                                                 | cleaved M-N@N-term                                      | 0.0769  | 1142.6290 | 572.3218  | 1142.5521 | 572.2833  | 2 | 31.76 |
| 4.01     | 5.2  | QPNIR                            | Gln->pyro-Glu@N-term;<br>Deamidated(R)@5                                                                                  |                                                         | 0.0472  | 610.3547  | 611.3619  | 610.3075  | 611.3148  | 1 | 54.11 |
| 4.01     | 5.2  | RALQEFDYLFGLTFEK                 | No ITRAQ4plex@N-term;<br>Oxidation(F)@10;<br>ITRAQ4plex(K)@16                                                             | missed R-A@1                                            | 0.0063  | 2136.1077 | 713.0432  | 2136.1013 | 713.0411  | 3 | 33.15 |
| 4.01     | 5.2  | RSIGVNNLDDK                      | ITRAQ4plex@N-term;<br>Deamidated(R)@1;<br>Oxidation(N)@6;<br>Deamidated(N)@7;<br>ITRAQ4plex(K)@11                         | missed R-S@1                                            | -0.0027 | 1535.8008 | 512.9409  | 1535.8035 | 512.9418  | 3 | 32.51 |
| 4.01     | 5.2  | RTLTP                            | No ITRAQ4plex@N-term                                                                                                      | cleaved M-R@N-term; cleaved P-L@C-term;<br>missed R-T@1 | -0.0071 | 485.2891  | 486.2963  | 485.2962  | 486.3035  | 1 | 33.69 |
| 4.01     | 5.2  | SGASSARGGSVSK                    | No ITRAQ4plex@N-term;<br>Deamidated(R)@7;<br>ITRAQ4plex(K)@13                                                             | missed R-G@7                                            | 0.0080  | 1294.6680 | 648.3412  | 1294.6599 | 648.3372  | 2 | 25.80 |
| 4.01     | 5.2  | TLPLDQLRK                        | ITRAQ4plex@N-term;<br>Oxidation(R)@8;<br>ITRAQ4plex(K)@9                                                                  | missed R-K@8                                            | -0.0193 | 1386.8246 | 694.4196  | 1386.8438 | 694.4292  | 2 | 49.97 |
| 4.01     | 5.2  | VKDPLYSIFR                       | ITRAQ4plex@N-term;<br>ITRAQ4plex(K)@2                                                                                     |                                                         | 0.0073  | 1524.8981 | 509.3066  | 1524.8908 | 509.3042  | 3 | 36.16 |
| 4.01     | 5.2  | VTGFSSDILLPSLSE<br>FNLGK         | ITRAQ4plex@N-term;<br>ITRAQ4plex(K)@22                                                                                    |                                                         | -0.0144 | 2619.3533 | 874.1250  | 2619.3676 | 874.1298  | 3 | 39.75 |
| LIC12401 |      |                                  |                                                                                                                           |                                                         |         |           |           |           |           |   |       |
| 2        | 9.2  | LTSIPEGVCSFPNLTK<br>LDLR         | ITRAQ4plex@N-term;<br>Methylthio(C)@9                                                                                     |                                                         | 0.0102  | 2392.2354 | 798.4191  | 2392.2252 | 798.4157  | 3 | 40.60 |
| 2        | 9.2  | NSGIK                            | ITRAQ4plex@N-term;<br>Deamidated(N)@1;<br>ITRAQ4plex(K)@5                                                                 | cleaved L-N@N-term                                      | 0.1163  | 806.5905  | 404.3025  | 806.4742  | 404.2444  | 2 | 19.05 |
| LIC12407 |      |                                  |                                                                                                                           |                                                         |         |           |           |           |           |   |       |
| 28.35    | 46.3 | ANNVLFYDFR                       | ITRAQ4plex@N-term                                                                                                         |                                                         | 0.0148  | 1401.7311 | 701.8728  | 1401.7163 | 701.8654  | 2 | 33.55 |
| 28.35    | 46.3 | ESVEHMLLDK                       | ITRAQ4plex@N-term;<br>ITRAQ4plex(K)@10                                                                                    |                                                         | -0.0048 | 1487.7849 | 496.9356  | 1487.7897 | 496.9372  | 3 | 32.30 |
| 28.35    | 46.3 | FDNIK                            | ITRAQ4plex@N-term;<br>Deamidated(N)@3;<br>ITRAQ4plex(K)@5                                                                 | cleaved I-F@N-term                                      | 0.0014  | 924.5175  | 463.2660  | 924.5160  | 463.2653  | 2 | 28.82 |
| 28.35    | 46.3 | FELSLEIREK                       | ITRAQ4plex@N-term;<br>ITRAQ4plex(K)@11                                                                                    | cleaved L-F@N-term; missed R-E@9                        | -0.0262 | 1665.8918 | 556.3046  | 1665.9181 | 556.3133  | 3 | 33.14 |
| 28.35    | 46.3 | FETEIWPWEGR                      | ITRAQ4plex@N-term                                                                                                         | cleaved R-P@C-term                                      | 0.0418  | 1592.8164 | 797.4155  | 1592.7745 | 797.3945  | 2 | 35.41 |
| 28.35    | 46.3 | FGTLIEADNVQK                     | ITRAQ4plex@N-term;<br>ITRAQ4plex(K)@13                                                                                    |                                                         | 0.0031  | 1692.9321 | 565.3180  | 1692.9290 | 565.3169  | 3 | 32.65 |
| 28.35    | 46.3 | FPDSSANPYLAFAAM<br>LMAGIDGVQK    | ITRAQ4plex@N-term;<br>ITRAQ4plex(K)@25                                                                                    |                                                         | -0.0339 | 2901.4309 | 968.1509  | 2901.4649 | 968.1622  | 3 | 43.15 |
| 28.35    | 46.3 | GGYFPVAPVDSQVDL<br>R             | ITRAQ4plex@N-term                                                                                                         |                                                         | -0.0282 | 1862.9366 | 932.4756  | 1862.9648 | 932.4897  | 2 | 32.97 |
| 28.35    | 46.3 | GIQQMPHTLR                       | ITRAQ4plex@N-term                                                                                                         |                                                         | 0.0167  | 1323.7371 | 442.2530  | 1323.7203 | 442.2474  | 3 | 37.66 |
| 28.35    | 46.3 | GLPFDGSSIPAWQPI                  | ITRAQ4plex@N-term;<br>Oxidation(F)@14                                                                                     | cleaved I-D@C-term                                      | 0.0539  | 1743.9492 | 582.3237  | 1743.8954 | 582.3057  | 3 | 50.36 |
| 28.35    | 46.3 | GLPFDGSSIPAWQPID<br>R            | ITRAQ4plex@N-term                                                                                                         |                                                         | -0.0267 | 1999.0018 | 1000.5080 | 1999.0285 | 1000.5215 | 2 | 34.85 |
| 13.09    | 17.8 | GPPREEDLFELSLEI<br>R             | ITRAQ4plex@N-term;<br>Oxidation(F)@3                                                                                      | cleaved P-G@N-term; missed R-E@4                        | -0.0559 | 2174.0417 | 1088.0280 | 2174.0977 | 1088.0561 | 2 | 50.50 |
| 28.35    | 46.3 | GYQNLSDTAMHYIGG<br>VLSHAK        | ITRAQ4plex@N-term;<br>ITRAQ4plex(K)@21                                                                                    |                                                         | 0.0009  | 2549.2949 | 638.3310  | 2549.2940 | 638.3308  | 4 | 53.12 |
| 28.35    | 46.3 | IDPGPREEDLFELSLEI<br>DEIR        | ITRAQ4plex@N-term                                                                                                         | missed R-E@7                                            | -0.0098 | 2483.2568 | 828.7595  | 2483.2666 | 828.7628  | 3 | 36.47 |

|          |       |      |                                      |                                                                                                     |                                                    |         |           |           |           |           |   |       |
|----------|-------|------|--------------------------------------|-----------------------------------------------------------------------------------------------------|----------------------------------------------------|---------|-----------|-----------|-----------|-----------|---|-------|
|          | 13.09 | 17.8 | IFDNK                                | ITRAQ4plex@N-term;<br>ITRAQ4plex(K)@6                                                               | cleaved F-I@N-term                                 | 0.0231  | 1036.6393 | 519.3269  | 1036.6161 | 519.3153  | 2 | 48.83 |
|          | 28.35 | 46.3 | IPFVNGDK                             | ITRAQ4plex@N-term;<br>Deamidated(N)@5;<br>ITRAQ4plex(K)@8                                           |                                                    | -0.0034 | 1177.6553 | 589.8349  | 1177.6587 | 589.8366  | 2 | 31.18 |
|          | 28.35 | 46.3 | KGDVFTEEFIQTYK                       | ITRAQ4plex@N-term;<br>ITRAQ4plex(K)@1;<br>ITRAQ4plex(K)@14                                          | missed K-G@1                                       | -0.0114 | 2136.1355 | 713.0524  | 2136.1468 | 713.0562  | 3 | 37.21 |
|          | 28.35 | 46.3 | LLPGFEAPSILAYSAQ<br>NR               | ITRAQ4plex@N-term                                                                                   |                                                    | 0.0061  | 2090.1343 | 697.7187  | 2090.1282 | 697.7167  | 3 | 38.18 |
|          | 28.35 | 46.3 | MSRTPSEVIAYAK                        | ITRAQ4plex@N-term;<br>Oxidation(P)@5;<br>Oxidation(Y)@11;<br>ITRAQ4plex(K)@13                       | missed R-T@3                                       | 0.0990  | 1772.0372 | 591.6863  | 1771.9382 | 591.6533  | 3 | 35.71 |
|          | 28.35 | 46.3 | NGVNLFAGK                            | ITRAQ4plex@N-term;<br>Deamidated(N)@1;<br>ITRAQ4plex(K)@9                                           |                                                    | 0.0049  | 1207.6854 | 604.8500  | 1207.6805 | 604.8475  | 2 | 30.66 |
|          | 13.09 | 17.8 | QMPHTLR                              | No ITRAQ4plex@N-term                                                                                | cleaved Q-Q@N-term                                 | 0.0519  | 881.5060  | 441.7603  | 881.4542  | 441.7344  | 2 | 41.96 |
|          | 28.35 | 46.3 | TPSEVIAYAK                           | ITRAQ4plex@N-term;<br>ITRAQ4plex(K)@10                                                              |                                                    | -0.0166 | 1365.7582 | 683.8864  | 1365.7748 | 683.8947  | 2 | 29.27 |
|          | 28.35 | 46.3 | YLESGLADTAYFGPE<br>NEFFIFDNK         | ITRAQ4plex@N-term;<br>ITRAQ4plex(K)@26                                                              |                                                    | 0.0245  | 3274.6199 | 1092.5470 | 3274.5954 | 1092.5391 | 3 | 50.08 |
| LIC12438 |       |      |                                      |                                                                                                     |                                                    |         |           |           |           |           |   |       |
|          | 6     | 31.1 | GQGSPEVNSSLNENS<br>GTVK              | ITRAQ4plex@N-term;<br>ITRAQ4plex(K)@19                                                              |                                                    | -0.0230 | 2191.0730 | 731.3649  | 2191.0960 | 731.3726  | 3 | 26.88 |
|          | 6     | 31.1 | IITIPLENIDFSSPGK                     | ITRAQ4plex@N-term;<br>ITRAQ4plex(K)@16                                                              |                                                    | -0.0151 | 2031.1345 | 678.0521  | 2031.1496 | 678.0571  | 3 | 35.97 |
|          | 6     | 31.1 | ISNDKAEDILISFYDDIP<br>NETR           | ITRAQ4plex@N-term;<br>ITRAQ4plex(K)@5                                                               | missed K-A@5                                       | -0.0038 | 2855.4395 | 952.8204  | 2855.4433 | 952.8217  | 3 | 38.80 |
|          | 6     | 31.1 | SLIYQMIIVAVSK                        | ITRAQ4plex@N-term;<br>ITRAQ4plex(K)@12                                                              |                                                    | -3.0084 | 1635.9539 | 818.9842  | 1638.9622 | 820.4884  | 2 | 51.75 |
| LIC12446 |       |      |                                      |                                                                                                     |                                                    |         |           |           |           |           |   |       |
|          | 2     | 4.0  | ALEILEK                              | ITRAQ4plex@N-term;<br>ITRAQ4plex(K)@7                                                               | cleaved I-A@N-term                                 | -0.0238 | 1102.6604 | 552.3375  | 1102.6841 | 552.3493  | 2 | 37.21 |
|          | 5.7   | 11.7 | EPTEVK                               | ITRAQ4plex@N-term;<br>ITRAQ4plex(K)@6                                                               | cleaved E-E@N-term                                 | -0.0373 | 989.5264  | 495.7705  | 989.5637  | 495.7891  | 2 | 32.24 |
|          | 5.7   | 11.7 | GTIALEILEK                           | ITRAQ4plex@N-term;<br>ITRAQ4plex(K)@10                                                              |                                                    | 0.0070  | 1373.8444 | 687.9294  | 1373.8374 | 687.9260  | 2 | 57.30 |
|          | 5.7   | 11.7 | KIEEPTVK                             | ITRAQ4plex@N-term;<br>ITRAQ4plex(K)@1;<br>ITRAQ4plex(K)@9                                           | missed K-I@1                                       | -0.0391 | 1503.8483 | 502.2900  | 1503.8874 | 502.3031  | 3 | 29.10 |
|          | 5.7   | 11.7 | KVLDQEIKTTPATDYNT<br>VKQYATFLLIQLNQK | ITRAQ4plex@N-term;<br>ITRAQ4plex(K)@1;<br>ITRAQ4plex(K)@8;<br>ITRAQ4plex(K)@18;<br>ITRAQ4plex(K)@31 | missed K-V@1; missed K-T@8; missed K-Q@18          | 0.1742  | 4343.6455 | 869.7364  | 4343.4714 | 869.7015  | 5 | 55.36 |
|          | 5.7   | 11.7 | TLSDLYSRNGEFQKA<br>ADK               | ITRAQ4plex@N-term;<br>Deamidated(N)@9;<br>ITRAQ4plex(K)@14;<br>ITRAQ4plex(K)@18                     | missed R-N@8; missed K-A@14                        | -0.0052 | 2475.2917 | 826.1046  | 2475.2971 | 826.1063  | 3 | 37.01 |
|          | 5.7   | 11.7 | TPATDYNTVK                           | ITRAQ4plex@N-term;<br>ITRAQ4plex(K)@10                                                              |                                                    | -0.0061 | 1396.7380 | 699.3763  | 1396.7442 | 699.3794  | 2 | 26.62 |
|          | 5.7   | 11.7 | VLDQEIKTTPATDYNTV<br>KQYATFLLIQLNQ   | ITRAQ4plex@N-term;<br>Deamidated(Q)@4;<br>ITRAQ4plex(K)@7;<br>ITRAQ4plex(K)@17;<br>Deamidated(Q)@26 | cleaved Q-K@C-term; missed K-T@7;<br>missed K-Q@17 | 0.0037  | 3801.0491 | 951.2695  | 3801.0453 | 951.2686  | 4 | 42.03 |
| LIC12447 |       |      |                                      |                                                                                                     |                                                    |         |           |           |           |           |   |       |
|          | 8.62  | 9.1  | ALEREEMSK                            | ITRAQ4plex@N-term;<br>ITRAQ4plex(K)@9                                                               | missed R-E@4                                       | 0.0606  | 1379.7928 | 690.9037  | 1379.7322 | 690.8734  | 2 | 45.08 |
|          | 8.62  | 9.1  | EMVIRGTVTSLTK                        | ITRAQ4plex@N-term;<br>ITRAQ4plex(K)@13                                                              | missed R-G@5                                       | -0.0254 | 1721.9700 | 574.9973  | 1721.9953 | 575.0057  | 3 | 38.58 |
|          | 8.62  | 9.1  | FGAFVELK                             | ITRAQ4plex@N-term;<br>ITRAQ4plex(K)@8                                                               |                                                    | 0.0167  | 1197.7168 | 599.8657  | 1197.7001 | 599.8573  | 2 | 52.26 |
|          | 8.62  | 9.1  | GNVLEGVITGITK                        | ITRAQ4plex@N-term;<br>ITRAQ4plex(K)@13                                                              |                                                    | -2.0321 | 1585.9119 | 793.9632  | 1587.9439 | 794.9792  | 2 | 34.74 |
|          | 2.08  | 2.3  | GNYSVAIVK                            | ITRAQ4plex@N-term;<br>ITRAQ4plex(K)@9                                                               |                                                    | -0.0034 | 1237.7240 | 619.8693  | 1237.7274 | 619.8710  | 2 | 40.45 |
|          | 2.08  | 2.3  | IEGLK                                | ITRAQ4plex@N-term;<br>ITRAQ4plex(K)@5                                                               | cleaved A-I@N-term                                 | 0.0204  | 846.5623  | 424.2884  | 846.5418  | 424.2782  | 2 | 43.53 |
|          | 8.62  | 9.1  | ISCGLK                               | ITRAQ4plex@N-term;<br>Methylthio(C)@3;<br>ITRAQ4plex(K)@6                                           |                                                    | 0.0223  | 953.5505  | 477.7825  | 953.5282  | 477.7714  | 2 | 28.62 |
|          | 8.62  | 9.1  | IVEGK                                | ITRAQ4plex@N-term;<br>ITRAQ4plex(K)@5                                                               | cleaved T-I@N-term                                 | 0.0235  | 832.5497  | 417.2821  | 832.5262  | 417.2704  | 2 | 36.00 |
|          | 2.08  | 2.3  | LALGLK                               | ITRAQ4plex@N-term;<br>ITRAQ4plex(K)@6                                                               |                                                    | 0.0074  | 901.6279  | 451.8212  | 901.6204  | 451.8175  | 2 | 41.54 |

|          |      |                                             |                                                                                                       |                                                    |         |           |          |           |          |   |       |
|----------|------|---------------------------------------------|-------------------------------------------------------------------------------------------------------|----------------------------------------------------|---------|-----------|----------|-----------|----------|---|-------|
| 8.62     | 9.1  | LLDEVNEEKWDALLK                             | ITRAQ4plex@N-term;<br>ITRAQ4plex(K)@9;<br>ITRAQ4plex(K)@16                                            | missed K-W@9                                       | -0.0104 | 2359.3259 | 787.4493 | 2359.3364 | 787.4528 | 3 | 37.27 |
| 8.62     | 9.1  | NEHPVGTIVEGK                                | ITRAQ4plex@N-term;<br>ITRAQ4plex(K)@12                                                                |                                                    | -0.0026 | 1566.8584 | 523.2934 | 1566.8609 | 523.2943 | 3 | 28.20 |
| 8.62     | 9.1  | QEGRIPIR                                    | Gln->pyro-Glu@N-term                                                                                  | missed R-I@4                                       | 0.0620  | 837.5077  | 419.7611 | 837.4457  | 419.7301 | 2 | 29.88 |
| 2.08     | 2.3  | QLMENPYEIFR                                 | ITRAQ4plex@N-term                                                                                     |                                                    | 0.0256  | 1582.8192 | 792.4169 | 1582.7935 | 792.4041 | 2 | 46.52 |
| 2.08     | 2.3  | QWEQSIHEEPELR                               | Gln->pyro-Glu@N-term                                                                                  |                                                    | 0.0090  | 1662.7728 | 832.3937 | 1662.7638 | 832.3892 | 2 | 42.14 |
| 2.08     | 2.3  | QWEQSIHEEPELRK                              | ITRAQ4plex@N-term;<br>ITRAQ4plex(K)@14                                                                | missed R-K@13                                      | -0.0744 | 2096.0151 | 699.6790 | 2096.0894 | 699.7038 | 3 | 37.37 |
| 8.62     | 9.1  | RGNVLEGVITGITK                              | ITRAQ4plex@N-term;<br>ITRAQ4plex(K)@14                                                                | missed R-G@1                                       | -0.0091 | 1744.0360 | 582.3526 | 1744.0451 | 582.3556 | 3 | 35.78 |
| 2.08     | 2.3  | RLSLGLK                                     | No ITRAQ4plex@N-term;<br>ITRAQ4plex(K)@7                                                              | missed R-L@1                                       | 0.0114  | 929.6258  | 465.8202 | 929.6144  | 465.8145 | 2 | 43.29 |
| 8.62     | 9.1  | SRESLGSFLNTSLR                              | ITRAQ4plex@N-term;<br>Deamidated(R)@14                                                                | cleaved P-S@N-term; missed R-E@2                   | -0.0114 | 1710.8909 | 856.4527 | 1710.9022 | 856.4584 | 2 | 57.08 |
| 8.62     | 9.1  | STFAEVFK                                    | ITRAQ4plex@N-term;<br>ITRAQ4plex(K)@8                                                                 |                                                    | -0.9607 | 1214.7136 | 608.3641 | 1215.6743 | 608.8444 | 2 | 44.79 |
| 8.62     | 9.1  | TNKEEK                                      | ITRAQ4plex@N-term;<br>ITRAQ4plex(K)@3;<br>ITRAQ4plex(K)@6                                             | cleaved M-T@N-term                                 | -0.0463 | 1179.6361 | 590.8253 | 1179.6825 | 590.8485 | 2 | 26.25 |
| 8.62     | 9.1  | TRSGVVSRLK                                  | ITRAQ4plex@N-term; No<br>ITRAQ4plex(K)@9                                                              | missed R-S@2; missed R-K@8                         | 0.0131  | 1132.6930 | 567.3538 | 1132.6798 | 567.3472 | 2 | 27.14 |
| 8.62     | 9.1  | VANPTSQLK                                   | ITRAQ4plex@N-term;<br>ITRAQ4plex(K)@9                                                                 |                                                    | -0.0034 | 1244.7299 | 623.3722 | 1244.7332 | 623.3739 | 2 | 27.61 |
| 8.62     | 9.1  | VANPTSQKKGDTVR                              | ITRAQ4plex@N-term;<br>Oxidation(N)@3;<br>Deamidated(Q)@7;<br>ITRAQ4plex(K)@9;<br>ITRAQ4plex(K)@10     | missed K-K@9; missed K-G@10                        | -0.0459 | 2062.1289 | 688.3836 | 2062.1748 | 688.3989 | 3 | 29.75 |
| 8.62     | 9.1  | YMILDVNLDAQR                                | ITRAQ4plex@N-term;<br>Deamidated(N)@7                                                                 |                                                    | 0.0263  | 1594.8411 | 798.4278 | 1594.8147 | 798.4146 | 2 | 44.24 |
| LIC12454 |      |                                             |                                                                                                       |                                                    |         |           |          |           |          |   |       |
| 8.01     | 52.5 | ARIMVTALGQEDLLAKA<br>KAIMGVKDFVVKPFS<br>PER | ITRAQ4plex@N-term;<br>ITRAQ4plex(K)@17;<br>ITRAQ4plex(K)@20;<br>ITRAQ4plex(K)@24;<br>ITRAQ4plex(K)@29 | missed R-I@2; missed K-A@17; missed K-M@20         | -0.0086 | 4590.6646 | 766.1180 | 4590.6731 | 766.1195 | 6 | 41.21 |
| 8.01     | 52.5 | DALQTGTGHEIVGEAEN<br>GNIAVEQYK              | ITRAQ4plex@N-term;<br>Deamidated(N)@16;<br>ITRAQ4plex(K)@25                                           |                                                    | 0.0076  | 2974.4841 | 992.5020 | 2974.4763 | 992.4994 | 3 | 59.12 |
| 8.01     | 52.5 | DFVVKPFSPER                                 | ITRAQ4plex@N-term;<br>ITRAQ4plex(K)@5                                                                 |                                                    | 0.0135  | 1607.9049 | 536.9756 | 1607.8915 | 536.9711 | 3 | 49.14 |
| 8.01     | 52.5 | EKDGIEAAQEIFK                               | ITRAQ4plex@N-term;<br>ITRAQ4plex(K)@2;<br>ITRAQ4plex(K)@13                                            |                                                    | -0.0203 | 1909.0320 | 637.3513 | 1909.0522 | 637.3580 | 3 | 35.63 |
| 8.01     | 52.5 | IIMVTALGQEDLLAK                             | ITRAQ4plex@N-term;<br>Deamidated(Q)@9;<br>ITRAQ4plex(K)@15                                            |                                                    | -0.0730 | 1903.0215 | 635.3478 | 1903.0944 | 635.3721 | 3 | 58.45 |
| 8.01     | 52.5 | MDIT                                        | ITRAQ4plex@N-term                                                                                     | cleaved T-M@N-term; cleaved T-M@C-term             | 0.0458  | 622.3576  | 623.3649 | 622.3118  | 623.3191 | 1 | 59.66 |
| 8.01     | 52.5 | TLKPDVLTMDITMR                              | ITRAQ4plex@N-term;<br>ITRAQ4plex(K)@3                                                                 |                                                    | 0.0058  | 1921.0679 | 641.3632 | 1921.0620 | 641.3613 | 3 | 33.95 |
| LIC13522 |      |                                             |                                                                                                       |                                                    |         |           |          |           |          |   |       |
| 8.46     | 4.5  | AIIESFLTQK                                  | ITRAQ4plex@N-term;<br>ITRAQ4plex(K)@10                                                                |                                                    | -0.0119 | 1436.8364 | 719.4255 | 1436.8482 | 719.4314 | 2 | 47.12 |
| 14.09    | 7.8  | APQEK                                       | ITRAQ4plex@N-term;<br>ITRAQ4plex(K)@5                                                                 |                                                    | -0.0509 | 859.4498  | 860.4571 | 859.5007  | 860.5080 | 1 | 48.80 |
| 14.09    | 7.8  | FSEHFYGLRIR                                 | ITRAQ4plex@N-term;<br>ITRAQ4plex(Y)@7                                                                 | missed R-I@10                                      | 0.0457  | 1826.0288 | 609.6835 | 1825.9831 | 609.6683 | 3 | 59.62 |
| 14.09    | 7.8  | GLTGASIMGDGTIIMVL<br>DIPGI                  | No ITRAQ4plex@N-term                                                                                  | cleaved I-V@C-term                                 | -0.0128 | 2143.1143 | 715.3787 | 2143.1269 | 715.3829 | 3 | 48.12 |
| 14.09    | 7.8  | GVGMNVNLIQEYK                               | ITRAQ4plex@N-term;<br>ITRAQ4plex(K)@15                                                                |                                                    | 0.0107  | 1949.0754 | 650.6991 | 1949.0648 | 650.6955 | 3 | 43.88 |
| 14.09    | 7.8  | IDLINR                                      | ITRAQ4plex@N-term                                                                                     |                                                    | 0.0355  | 886.5713  | 444.2929 | 886.5358  | 444.2752 | 2 | 29.66 |
| 14.09    | 7.8  | IEDDMAASESK                                 | ITRAQ4plex@N-term;<br>ITRAQ4plex(K)@11                                                                |                                                    | -0.0070 | 1482.7046 | 742.3596 | 1482.7116 | 742.3631 | 2 | 27.65 |
| 14.09    | 7.8  | IIGLQDKTDREEF                               | ITRAQ4plex@N-term;<br>ITRAQ4plex(K)@7;<br>Oxidation(F)@13                                             | cleaved F-P@C-term; missed K-T@7;<br>missed R-E@10 | -0.0122 | 1866.9810 | 934.4977 | 1866.9931 | 934.5038 | 2 | 52.45 |
| 14.09    | 7.8  | IVAEKEEVFR                                  | ITRAQ4plex@N-term;<br>ITRAQ4plex(K)@5                                                                 |                                                    | -0.0088 | 1506.8562 | 503.2927 | 1506.8650 | 503.2956 | 3 | 31.04 |
| 14.09    | 7.8  | KIGFMVDELVGK                                | ITRAQ4plex@N-term;<br>ITRAQ4plex(K)@1;<br>ITRAQ4plex(K)@12                                            | missed K-I@1                                       | -0.0127 | 1767.0203 | 590.0140 | 1767.0330 | 590.0183 | 3 | 39.03 |
| 14.09    | 7.8  | KPFVSSSEYYR                                 | ITRAQ4plex@N-term;<br>ITRAQ4plex(K)@1                                                                 |                                                    | 0.0021  | 1657.8575 | 553.6265 | 1657.8555 | 553.6258 | 3 | 29.95 |



|          |       |      |                                           |                                                                                                                           |                                        |         |           |          |           |          |   |       |
|----------|-------|------|-------------------------------------------|---------------------------------------------------------------------------------------------------------------------------|----------------------------------------|---------|-----------|----------|-----------|----------|---|-------|
|          | 14.09 | 7.8  | LENVVNTGMMNAGM<br>VLSQLLK                 | ITRAQ4plex@N-term;<br>Oxidation(N)@6;<br>ITRAQ4plex(T)@7;<br>ITRAQ4plex(K)@21                                             |                                        | 0.0497  | 2709.5090 | 904.1769 | 2709.4593 | 904.1604 | 3 | 55.12 |
|          | 14.09 | 7.8  | MAGILGEYTELFLEES<br>EDQIEELNANLLK         | No ITRAQ4plex@N-term;<br>Deamidated(O)@19;<br>Deamidated(N)@26;<br>ITRAQ4plex(K)@29                                       |                                        | 0.1628  | 3456.8496 | 865.2197 | 3456.6867 | 865.1790 | 4 | 53.83 |
|          | 14.09 | 7.8  | MENLLQLIRDGK                              | No ITRAQ4plex@N-term;<br>Deamidated(O)@6;<br>Oxidation(D)@10;<br>ITRAQ4plex(K)@12                                         | missed R-D@9                           | -0.0007 | 1589.8562 | 795.9354 | 1589.8569 | 795.9357 | 2 | 37.94 |
|          | 14.09 | 7.8  | NSVDHGIETPAER                             | ITRAQ4plex@N-term                                                                                                         |                                        | -0.0083 | 1567.7629 | 523.5949 | 1567.7712 | 523.5977 | 3 | 26.97 |
|          | 14.09 | 7.8  | PAETSSQAAPPVVK                            | ITRAQ4plex@N-term;<br>ITRAQ4plex(K)@14                                                                                    | cleaved K-P@N-term                     | 0.0002  | 1668.9292 | 557.3170 | 1668.9290 | 557.3169 | 3 | 27.13 |
|          | 8.46  | 4.5  | RNSVDHGIETPAER                            | No ITRAQ4plex@N-term;<br>Oxidation(N)@2; Oxidation(D)@5                                                                   | cleaved I-R@N-term; missed R-N@1       | -0.0077 | 1611.7523 | 538.2581 | 1611.7601 | 538.2606 | 3 | 34.82 |
|          | 14.09 | 7.8  | SIPDLEEEK                                 | ITRAQ4plex@N-term;<br>ITRAQ4plex(K)@10                                                                                    |                                        | -0.0025 | 1459.7990 | 730.9067 | 1459.8014 | 730.9080 | 2 | 32.76 |
|          | 8.46  | 4.5  | TTNPTNVYNHK                               | ITRAQ4plex@N-term;<br>ITRAQ4plex(K)@11                                                                                    |                                        | 0.0015  | 1575.8263 | 526.2827 | 1575.8249 | 526.2822 | 3 | 36.83 |
|          | 14.09 | 7.8  | VIDALGEPLHLIR                             | ITRAQ4plex@N-term                                                                                                         |                                        | 0.0034  | 1702.0298 | 568.3505 | 1702.0263 | 568.3494 | 3 | 37.61 |
| LIC12457 |       |      |                                           |                                                                                                                           |                                        |         |           |          |           |          |   |       |
|          | 3.7   | 14.1 | DFYGEPLGNIMTSFDN<br>R                     | ITRAQ4plex@N-term                                                                                                         | cleaved L-D@N-term                     | 0.1839  | 2119.1641 | 707.3953 | 2118.9802 | 707.3340 | 3 | 57.42 |
|          | 3.7   | 14.1 | GEIPIILDLK                                | ITRAQ4plex@N-term;<br>ITRAQ4plex(K)@10                                                                                    |                                        | 0.0032  | 1397.8770 | 699.9457 | 1397.8737 | 699.9441 | 2 | 35.37 |
|          | 3.7   | 14.1 | IPNGDDYILGVINLR                           | ITRAQ4plex@N-term;<br>Deamidated(N)@3                                                                                     |                                        | 0.0065  | 1815.9917 | 909.0031 | 1815.9852 | 908.9999 | 2 | 54.83 |
| LIC12460 |       |      |                                           |                                                                                                                           |                                        |         |           |          |           |          |   |       |
|          | 9.88  | 22.2 | AENGRLESENETLR                            | ITRAQ4plex@N-term;<br>Deamidated(N)@3;<br>Deamidated(N)@10                                                                | missed R-L@5                           | -0.0142 | 1762.8314 | 588.6177 | 1762.8455 | 588.6224 | 3 | 27.43 |
|          | 9.88  | 22.2 | ALELIADLR                                 | ITRAQ4plex@N-term                                                                                                         |                                        | 0.0105  | 1156.7042 | 579.3594 | 1156.6938 | 579.3542 | 2 | 54.01 |
|          | 9.88  | 22.2 | ALELIADLRAENGR                            | ITRAQ4plex@N-term;<br>Deamidated(N)@12                                                                                    | missed R-A@9                           | -0.0707 | 1684.8523 | 562.6247 | 1684.9230 | 562.6483 | 3 | 25.67 |
|          | 9.88  | 22.2 | EKELSSLR                                  | ITRAQ4plex@N-term;<br>ITRAQ4plex(K)@2                                                                                     |                                        | -0.0192 | 1248.7090 | 417.2436 | 1248.7281 | 417.2500 | 3 | 58.87 |
|          | 9.88  | 22.2 | ENGRLESENETLR                             | ITRAQ4plex@N-term;<br>Deamidated(N)@2                                                                                     | cleaved A-E@N-term; missed R-L@4       | -0.0005 | 1690.8239 | 564.6152 | 1690.8244 | 564.6154 | 3 | 27.65 |
|          | 9.88  | 22.2 | EQLQKTTNELNDLK                            | Glu->pyro-Glu@N-term;<br>Deamidated(O)@2;<br>Deamidated(O)@4;<br>ITRAQ4plex(K)@5;<br>Deamidated(N)@8;<br>ITRAQ4plex(K)@14 | missed K-T@5                           | -0.0117 | 1945.9971 | 649.6730 | 1946.0088 | 649.6769 | 3 | 30.30 |
|          | 9.88  | 22.2 | IADLR                                     | No ITRAQ4plex@N-term                                                                                                      | cleaved L-I@N-term                     | 0.0082  | 586.3521  | 587.3594 | 586.3439  | 587.3511 | 1 | 54.24 |
|          | 8.35  | 22.2 | INQLLGR                                   | ITRAQ4plex@N-term                                                                                                         |                                        | -0.0188 | 956.5702  | 479.2924 | 956.5889  | 479.3017 | 2 | 41.28 |
|          | 8.35  | 22.2 | INQLLGR                                   | ITRAQ4plex@N-term;<br>Deamidated(N)@2                                                                                     | cleaved L-D@C-term; missed R-L@7       | -0.0386 | 1070.6184 | 536.3165 | 1070.6570 | 536.3358 | 2 | 58.35 |
|          | 9.88  | 22.2 | LIADLR                                    | No ITRAQ4plex@N-term                                                                                                      | cleaved E-L@N-term                     | 0.0238  | 699.4517  | 700.4590 | 699.4279  | 700.4352 | 1 | 56.81 |
|          | 9.88  | 22.2 | METIEELESK                                | ITRAQ4plex@N-term;<br>ITRAQ4plex(K)@10                                                                                    | cleaved T-M@N-term                     | -0.0065 | 1495.7618 | 748.8882 | 1495.7683 | 748.8914 | 2 | 31.38 |
|          | 9.88  | 22.2 | MLTMETIEELESK                             | ITRAQ4plex@N-term;<br>ITRAQ4plex(K)@13                                                                                    |                                        | 0.0023  | 1840.9429 | 921.4787 | 1840.9406 | 921.4776 | 2 | 50.65 |
|          | 9.88  | 22.2 | TTNELNDLKER                               | ITRAQ4plex@N-term;<br>ITRAQ4plex(K)@9                                                                                     |                                        | 0.0003  | 1619.8726 | 540.9648 | 1619.8722 | 540.9647 | 3 | 29.23 |
| LIC12475 |       |      |                                           |                                                                                                                           |                                        |         |           |          |           |          |   |       |
|          | 11.09 | 11.3 | AGIEYK                                    | ITRAQ4plex@N-term;<br>ITRAQ4plex(K)@6                                                                                     | cleaved A-A@N-term                     | 0.0267  | 967.5850  | 484.7997 | 967.5582  | 484.7864 | 2 | 38.21 |
|          | 11.09 | 11.3 | ALLDSSEEYHK                               | ITRAQ4plex@N-term;<br>ITRAQ4plex(K)@11                                                                                    |                                        | 0.0021  | 1578.8153 | 527.2791 | 1578.8133 | 527.2784 | 3 | 40.62 |
|          | 11.09 | 11.3 | LLGAFVFGPRASDMV<br>AELAVAMEFGASAEDI<br>AR | ITRAQ4plex@N-term                                                                                                         | missed R-A@10                          | 0.0013  | 3554.8037 | 889.7082 | 3554.8023 | 889.7079 | 4 | 56.61 |
|          | 11.09 | 11.3 | LMNRKQIVK                                 | ITRAQ4plex@N-term;<br>Deamidated(N)@3;<br>Deamidated(R)@4;<br>ITRAQ4plex(K)@5;<br>ITRAQ4plex(K)@10                        | missed R-K@4                           | 0.0230  | 1678.0043 | 560.3420 | 1677.9813 | 560.3344 | 3 | 52.11 |
|          | 11.09 | 11.3 | LVAVG                                     | ITRAQ4plex@N-term                                                                                                         | cleaved V-L@N-term; cleaved G-R@C-term | 0.0188  | 601.4109  | 602.4182 | 601.3921  | 602.3994 | 1 | 53.62 |
|          | 11.09 | 11.3 | NIITSDHAIDVR                              | Carbamyl@N-term                                                                                                           |                                        | 0.0088  | 1395.7195 | 698.8670 | 1395.7106 | 698.8626 | 2 | 41.20 |
| LIC12476 |       |      |                                           |                                                                                                                           |                                        |         |           |          |           |          |   |       |
|          | 12.15 | 15.3 | ATLTLPEIPKAVPAAR                          | No ITRAQ4plex@N-term;<br>ITRAQ4plex(K)@10                                                                                 | missed K-A@10                          | -0.0645 | 1791.0095 | 598.0104 | 1791.0740 | 598.0319 | 3 | 50.81 |

|          |       |      |                                |                                                                                                                         |                                           |         |           |           |           |           |   |       |
|----------|-------|------|--------------------------------|-------------------------------------------------------------------------------------------------------------------------|-------------------------------------------|---------|-----------|-----------|-----------|-----------|---|-------|
| LIC12486 |       |      |                                |                                                                                                                         |                                           |         |           |           |           |           |   |       |
|          | 2     | 3.6  | HIPK                           | No iTRAQ4plex@N-term;<br>iTRAQ4plex(K)@4                                                                                | cleaved F-H@N-term                        | -0.0146 | 637.3887  | 638.3960  | 637.4033  | 638.4106  | 1 | 55.89 |
|          | 2     | 3.6  | VEGLEEDHSK                     | iTRAQ4plex@N-term;<br>iTRAQ4plex(K)@10                                                                                  |                                           | 0.0178  | 1429.7471 | 477.5896  | 1429.7293 | 477.5837  | 3 | 26.73 |
| LIC12495 |       |      |                                |                                                                                                                         |                                           |         |           |           |           |           |   |       |
|          | 2.04  | 7.4  | IGILNK                         | iTRAQ4plex@N-term;<br>iTRAQ4plex(K)@6                                                                                   |                                           | 0.0153  | 944.6415  | 473.3280  | 944.6262  | 473.3204  | 2 | 41.07 |
|          | 2.04  | 7.4  | LGLPEVSLGLIPGFGG<br>TQR        | iTRAQ4plex@N-term                                                                                                       |                                           | 0.0247  | 2054.1892 | 1028.1020 | 2054.1646 | 1028.0896 | 2 | 53.59 |
|          | 2.04  | 7.4  | QRPS                           | Gln->pyro-Glu@N-term                                                                                                    | cleaved I-Q@N-term; cleaved S-A@C-term    | 0.0147  | 469.2432  | 470.2504  | 469.2285  | 470.2358  | 1 | 59.34 |
| LIC12534 |       |      |                                |                                                                                                                         |                                           |         |           |           |           |           |   |       |
|          | 2     | 2.2  | IGLINK                         | iTRAQ4plex@N-term;<br>iTRAQ4plex(K)@6                                                                                   | cleaved G-I@N-term                        | 0.0159  | 944.6422  | 473.3283  | 944.6262  | 473.3204  | 2 | 40.86 |
|          | 2     | 2.2  | INFMAAFGR                      | iTRAQ4plex@N-term                                                                                                       |                                           | 0.0181  | 1169.6318 | 585.8232  | 1169.6137 | 585.8141  | 2 | 48.40 |
| LIC12537 |       |      |                                |                                                                                                                         |                                           |         |           |           |           |           |   |       |
|          | 2     | 3.7  | IEAVLLLLDKEK                   | iTRAQ4plex@N-term;<br>iTRAQ4plex(K)@10;<br>iTRAQ4plex(K)@12                                                             |                                           | -0.0054 | 1815.1393 | 606.0537  | 1815.1447 | 606.0555  | 3 | 37.99 |
|          | 2     | 3.7  | QVIR                           | Gln->pyro-Glu@N-term                                                                                                    | cleaved D-Q@N-term                        | 0.0034  | 497.2996  | 498.3068  | 497.2962  | 498.3035  | 1 | 56.15 |
| LIC12538 |       |      |                                |                                                                                                                         |                                           |         |           |           |           |           |   |       |
|          | 13.43 | 12.0 | AATVILYPNFATRELEL<br>AVR       | No iTRAQ4plex@N-term                                                                                                    | cleaved L-A@N-term; missed R-E@13         | -0.0691 | 2246.1733 | 749.7317  | 2246.2423 | 749.7547  | 3 | 42.81 |
|          | 13.43 | 12.0 | EEAVDLANVISEGALPI<br>PLR       | iTRAQ4plex@N-term                                                                                                       |                                           | 0.0103  | 2249.2493 | 750.7570  | 2249.2389 | 750.7536  | 3 | 39.76 |
|          | 13.43 | 12.0 | EIENLNK                        | iTRAQ4plex@N-term;<br>Deamidated(N)@4;<br>Deamidated(N)@6;<br>iTRAQ4plex(K)@7                                           |                                           | 0.0276  | 1148.6444 | 575.3295  | 1148.6169 | 575.3157  | 2 | 25.68 |
|          | 13.43 | 12.0 | GDFEDYASK                      | iTRAQ4plex@N-term;<br>iTRAQ4plex(K)@9                                                                                   |                                           | 0.0029  | 1318.6315 | 660.3230  | 1318.6285 | 660.3215  | 2 | 28.75 |
|          | 2.01  | 1.9  | GRPLTIK                        | No iTRAQ4plex@N-term;<br>iTRAQ4plex(K)@7                                                                                |                                           | -0.0031 | 927.5956  | 464.8051  | 927.5987  | 464.8066  | 2 | 39.37 |
|          | 13.43 | 12.0 | ILAATVILYPNFATR                | iTRAQ4plex@N-term;<br>Oxidation(F)@10                                                                                   | cleaved I-I@N-term                        | -0.0013 | 1822.0463 | 608.3560  | 1822.0475 | 608.3564  | 3 | 36.25 |
|          | 13.43 | 12.0 | INQISQENPELILEAK               | iTRAQ4plex@N-term;<br>Oxidation(N)@2;<br>Deamidated(Q)@6;<br>iTRAQ4plex(K)@16                                           |                                           | 0.0017  | 2143.1633 | 715.3950  | 2143.1616 | 715.3945  | 3 | 58.82 |
|          | 13.43 | 12.0 | ITSAK                          | iTRAQ4plex@N-term;<br>iTRAQ4plex(K)@5                                                                                   | cleaved F-I@N-term                        | 0.0936  | 806.6041  | 404.3093  | 806.5105  | 404.2625  | 2 | 8.83  |
|          | 13.43 | 12.0 | KEFISISPEQK                    | iTRAQ4plex@N-term;<br>iTRAQ4plex(K)@1;<br>iTRAQ4plex(K)@11                                                              |                                           | -0.0474 | 1736.9564 | 579.9927  | 1737.0038 | 580.0085  | 3 | 32.65 |
|          | 13.43 | 12.0 | LGLDLQGGMR                     | Delta:H(2)C(2)@N-term;<br>Methyl(L)@3                                                                                   |                                           | 0.0143  | 1098.6000 | 550.3073  | 1098.5856 | 550.3001  | 2 | 34.25 |
|          | 13.43 | 12.0 | LLELEKAKLIIDNRLTS<br>QNLTEPQVR | iTRAQ4plex@N-term;<br>iTRAQ4plex(K)@6;<br>iTRAQ4plex(K)@8;<br>Deamidated(R)@14;<br>Deamidated(N)@19;<br>Oxidation(F)@23 | missed K-A@6; missed K-L@8; missed R-L@14 | -0.1678 | 3483.8201 | 871.9623  | 3483.9878 | 872.0042  | 4 | 44.93 |
|          | 13.43 | 12.0 | LRPTLVEEWITK                   | iTRAQ4plex@N-term;<br>iTRAQ4plex(K)@12                                                                                  |                                           | -0.0068 | 1772.0372 | 591.6863  | 1772.0440 | 591.6886  | 3 | 35.71 |
|          | 13.43 | 12.0 | LTSQNLTEPQVR                   | No iTRAQ4plex@N-term                                                                                                    |                                           | -0.0037 | 1384.7273 | 693.3709  | 1384.7310 | 693.3728  | 2 | 29.11 |
|          | 13.43 | 12.0 | LVMDLLVNR                      | iTRAQ4plex@N-term;<br>Deamidated(N)@8                                                                                   |                                           | 0.0375  | 1216.7346 | 406.5855  | 1216.6971 | 406.5730  | 3 | 26.94 |
|          | 13.43 | 12.0 | LYPNFATR                       | iTRAQ4plex@N-term                                                                                                       | cleaved I-L@N-term                        | 0.0417  | 1124.6517 | 563.3331  | 1124.6100 | 563.3123  | 2 | 26.80 |
|          | 13.43 | 12.0 | SIAAGGVAIQDGSFTK               | iTRAQ4plex@N-term;<br>iTRAQ4plex(K)@16                                                                                  |                                           | 0.0124  | 1809.0000 | 604.0073  | 1808.9876 | 604.0031  | 3 | 59.25 |
|          | 13.43 | 12.0 | SGAEK                          | No iTRAQ4plex@N-term;<br>iTRAQ4plex(K)@5                                                                                | cleaved S-S@N-term                        | 0.0042  | 634.3450  | 635.3523  | 634.3408  | 635.3481  | 1 | 37.78 |
|          | 13.43 | 12.0 | TSQLNTEPQVR                    | No iTRAQ4plex@N-term                                                                                                    | cleaved L-T@N-term                        | 0.0045  | 1271.6515 | 636.8330  | 1271.6470 | 636.8308  | 2 | 27.42 |
|          | 13.43 | 12.0 | TVTDPSEKKEK                    | iTRAQ4plex@N-term;<br>iTRAQ4plex(K)@10;<br>iTRAQ4plex(K)@12                                                             |                                           | -0.0391 | 1750.8923 | 584.6381  | 1750.9314 | 584.6511  | 3 | 26.44 |
|          | 13.43 | 12.0 | VLEMRFIGPTLGIESIE<br>VGMK      | iTRAQ4plex@N-term;<br>Deamidated(R)@5;<br>iTRAQ4plex(K)@21                                                              | missed R-F@5                              | -0.0695 | 2607.3564 | 870.1261  | 2607.4260 | 870.1493  | 3 | 53.72 |
| LIC12540 |       |      |                                |                                                                                                                         |                                           |         |           |           |           |           |   |       |
|          | 2     | 12.0 | DTNVSFTASTVLK                  | iTRAQ4plex@N-term;<br>iTRAQ4plex(K)@13                                                                                  |                                           | -2.0488 | 1667.8643 | 834.9394  | 1669.9130 | 835.9638  | 2 | 51.84 |
|          | 2     | 12.0 | GDEVVTSSGIHGK                  | iTRAQ4plex@N-term;<br>iTRAQ4plex(K)@13                                                                                  |                                           | -0.0071 | 1572.8280 | 525.2833  | 1572.8351 | 525.2856  | 3 | 27.03 |

|          |      |      |                 |                                                                                                     |                                        |         |           |          |           |          |   |       |
|----------|------|------|-----------------|-----------------------------------------------------------------------------------------------------|----------------------------------------|---------|-----------|----------|-----------|----------|---|-------|
|          | 2    | 12.0 | KEMIDSLKK       | ITRAQ4plex@N-term;<br>ITRAQ4plex(K)@1;<br>Dethiomethyl(M)@3;<br>ITRAQ4plex(K)@8;<br>ITRAQ4plex(K)@9 | missed K-K@8                           | -0.0769 | 1618.9337 | 540.6519 | 1619.0105 | 540.6774 | 3 | 28.93 |
| LIC12542 |      |      |                 |                                                                                                     |                                        |         |           |          |           |          |   |       |
|          | 2    | 5.2  | IQFFR           | ITRAQ4plex@N-term                                                                                   | cleaved A-I@N-term                     | 0.0410  | 853.5342  | 427.7744 | 853.4932  | 427.7539 | 2 | 34.82 |
|          | 2    | 5.2  | VIFINPNILTMLR   | ITRAQ4plex@N-term                                                                                   |                                        | -0.0153 | 1686.9824 | 844.4985 | 1686.9977 | 844.5061 | 2 | 41.26 |
|          | 2    | 5.2  | VLYPNLSKGMFQK   | ITRAQ4plex@N-term;<br>ITRAQ4plex(K)@8;<br>Deamidated(Q)@12;<br>ITRAQ4plex(K)@13                     | missed K-G@8                           | -0.0423 | 1957.0649 | 653.3622 | 1957.1072 | 653.3764 | 3 | 40.39 |
| LIC12544 |      |      |                 |                                                                                                     |                                        |         |           |          |           |          |   |       |
|          | 2.8  | 3.5  | IISQAVTENSAK    | No ITRAQ4plex@N-term;<br>ITRAQ4plex(K)@12                                                           |                                        | -0.0008 | 1403.7734 | 702.8940 | 1403.7742 | 702.8944 | 2 | 34.88 |
|          | 6.01 | 11.3 | ILSYTIPEISSLR   | No ITRAQ4plex@N-term                                                                                |                                        | -0.0072 | 1490.8273 | 746.4209 | 1490.8344 | 746.4245 | 2 | 42.58 |
|          | 2.8  | 3.5  | IQNGK           | ITRAQ4plex@N-term;<br>ITRAQ4plex(K)@5                                                               | cleaved M-I@N-term; cleaved K-P@C-term | 0.0455  | 846.5623  | 424.2884 | 846.5167  | 424.2656 | 2 | 43.53 |
|          | 6.01 | 11.3 | KLDIPENIDFLSR   | ITRAQ4plex@N-term;<br>ITRAQ4plex(K)@1                                                               | missed K-L@1                           | -0.0150 | 1847.0248 | 616.6822 | 1847.0396 | 616.6872 | 3 | 34.77 |
|          | 6.01 | 11.3 | LDTGQLINLYRGEK  | ITRAQ4plex@N-term;<br>Deamidated(Q)@5;<br>Deamidated(R)@11;<br>ITRAQ4plex(K)@14                     | missed R-G@11                          | 0.0443  | 1909.0844 | 637.3687 | 1909.0400 | 637.3540 | 3 | 33.86 |
|          | 6.01 | 11.3 | LFIDSVEK        | ITRAQ4plex@N-term;<br>ITRAQ4plex(K)@8                                                               |                                        | 0.0002  | 1237.7164 | 619.8655 | 1237.7162 | 619.8654 | 2 | 31.51 |
|          | 6.01 | 11.3 | TASYTYKINVDK    | ITRAQ4plex@N-term;<br>ITRAQ4plex(K)@7;<br>Oxidation(D)@11;<br>ITRAQ4plex(K)@12                      | cleaved P-T@N-term; missed K-I@7       | -0.0147 | 1850.0004 | 617.6741 | 1850.0151 | 617.6790 | 3 | 36.18 |
|          | 6.01 | 11.3 | VGDGSAVEMIQNGPK | ITRAQ4plex@N-term;<br>Deamidated(N)@12;<br>ITRAQ4plex(K)@14;<br>ITRAQ4plex(K)@16                    |                                        | 0.0195  | 2062.1289 | 688.3836 | 2062.1094 | 688.3771 | 3 | 29.75 |
| LIC12563 |      |      |                 |                                                                                                     |                                        |         |           |          |           |          |   |       |
|          | 4    | 3.7  | EFFENHLFK       | ITRAQ4plex@N-term;<br>ITRAQ4plex(K)@10                                                              |                                        | 0.0029  | 1610.8729 | 537.9649 | 1610.8700 | 537.9640 | 3 | 35.65 |
|          | 4    | 3.7  | EKESSVVK        | ITRAQ4plex@N-term;<br>ITRAQ4plex(K)@2;<br>ITRAQ4plex(K)@8                                           | cleaved V-E@N-term                     | -0.0866 | 1294.6593 | 648.3369 | 1294.7458 | 648.3802 | 2 | 24.96 |
|          | 4    | 3.7  | INMRAFRHSQK     | ITRAQ4plex@N-term;<br>Deamidated(R)@7;<br>Deamidated(Q)@10;<br>ITRAQ4plex(K)@11                     | missed R-A@4; missed R-H@7             | 0.0176  | 1676.9199 | 559.9806 | 1676.9024 | 559.9748 | 3 | 35.15 |
|          | 4    | 3.7  | KESSVKGWQK      | ITRAQ4plex@N-term; No<br>ITRAQ4plex(K)@1;<br>ITRAQ4plex(K)@7;<br>ITRAQ4plex(K)@10                   | cleaved E-K@N-term; missed K-W@7       | -0.0470 | 1607.8890 | 536.9703 | 1607.9361 | 536.9860 | 3 | 44.11 |
|          | 4    | 3.7  | LMPFVETVYHYVANK | ITRAQ4plex@N-term;<br>ITRAQ4plex(K)@15                                                              |                                        | 0.0349  | 2098.1514 | 700.3911 | 2098.1165 | 700.3794 | 3 | 40.69 |
|          | 4    | 3.7  | VANKVPIISLEK    | ITRAQ4plex@N-term;<br>Deamidated(N)@3;<br>ITRAQ4plex(K)@4;<br>Oxidation(P)@8;<br>ITRAQ4plex(K)@13   | cleaved Y-V@N-term; missed K-V@4       | -0.0101 | 1872.1560 | 625.0593 | 1872.1661 | 625.0626 | 3 | 43.56 |
| LIC12568 |      |      |                 |                                                                                                     |                                        |         |           |          |           |          |   |       |
|          | 3.3  | 6.8  | DALDFK          | ITRAQ4plex@N-term;<br>ITRAQ4plex(K)@6                                                               |                                        | 0.0153  | 995.5685  | 498.7915 | 995.5531  | 498.7838 | 2 | 37.22 |
|          | 1.4  | 0.0  | EFPIQWVK        | ITRAQ4plex@N-term;<br>ITRAQ4plex(K)@8                                                               |                                        | 0.0322  | 1347.8116 | 674.9131 | 1347.7794 | 674.8970 | 2 | 49.66 |
|          | 3.3  | 6.8  | EIKDLIEENR      | ITRAQ4plex@N-term;<br>ITRAQ4plex(K)@3                                                               |                                        | 0.0028  | 1545.8635 | 516.2951 | 1545.8606 | 516.2941 | 3 | 32.14 |
|          | 1.4  | 0.0  | ELLALHER        | Carbamylation@N-term                                                                                |                                        | -0.0099 | 1022.5410 | 512.2778 | 1022.5509 | 512.2827 | 2 | 41.85 |
|          | 1.4  | 0.0  | IDLLK           | ITRAQ4plex@N-term;<br>ITRAQ4plex(K)@5                                                               | cleaved A-I@N-term                     | -0.0006 | 888.5882  | 445.3014 | 888.5888  | 445.3017 | 2 | 38.84 |
|          | 3.3  | 6.8  | LDFK            | ITRAQ4plex@N-term;<br>ITRAQ4plex(K)@4                                                               | cleaved A-L@N-term                     | -0.0022 | 809.4869  | 405.7507 | 809.4891  | 405.7518 | 2 | 29.36 |
|          | 3.3  | 6.8  | TQELKDALDFKK    | No ITRAQ4plex@N-term;<br>ITRAQ4plex(K)@5;<br>ITRAQ4plex(K)@11;<br>ITRAQ4plex(K)@12                  | missed K-K@11                          | -0.0306 | 1867.0475 | 623.3564 | 1867.0780 | 623.3666 | 3 | 41.44 |
|          | 3.3  | 6.8  | VSEILDSMK       | ITRAQ4plex@N-term;<br>ITRAQ4plex(K)@9                                                               |                                        | -0.0096 | 1308.7107 | 655.3626 | 1308.7203 | 655.3674 | 2 | 32.74 |
| LIC12574 |      |      |                 |                                                                                                     |                                        |         |           |          |           |          |   |       |
|          | 5.4  | 12.7 | IAGQTAPPGK      | ITRAQ4plex@N-term;<br>ITRAQ4plex(K)@10                                                              | cleaved F-I@N-term                     | -0.0341 | 1226.6886 | 614.3516 | 1226.7227 | 614.3686 | 2 | 26.72 |

|          |      |      |                            |                                                                                                                                            |                                                   |         |           |          |           |          |   |       |
|----------|------|------|----------------------------|--------------------------------------------------------------------------------------------------------------------------------------------|---------------------------------------------------|---------|-----------|----------|-----------|----------|---|-------|
|          | 5.4  | 12.7 | KPVVGFIAQTAPPK             | ITRAQ4plex@N-term;<br>ITRAQ4plex(K)@1;<br>ITRAQ4plex(K)@16                                                                                 |                                                   | -0.0186 | 1998.1805 | 667.0674 | 1998.1992 | 667.0737 | 3 | 31.15 |
|          | 8    | 18.2 | LGIMPGFIHSPGSGVIVSR        | Carbamyli@N-term                                                                                                                           |                                                   | 0.0056  | 1966.0515 | 984.0330 | 1966.0459 | 984.0302 | 2 | 49.16 |
|          | 5.4  | 12.7 | TYESVAQITK                 | ITRAQ4plex@N-term;<br>Deamidated(O)@7;<br>ITRAQ4plex(K)@10                                                                                 | cleaved L-T@N-term                                | 0.0627  | 1427.8379 | 714.9262 | 1427.7751 | 714.8948 | 2 | 46.77 |
|          | 8    | 18.2 | VDENTKVVQGITGK             | ITRAQ4plex@N-term;<br>ITRAQ4plex(K)@6;<br>ITRAQ4plex(K)@15                                                                                 | cleaved L-V@N-term; missed K-V@6                  | -0.0687 | 2018.1050 | 673.7089 | 2018.1737 | 673.7319 | 3 | 46.86 |
|          | 5.4  | 12.7 | VVAGVTPGK                  | ITRAQ4plex@N-term;<br>ITRAQ4plex(K)@9                                                                                                      |                                                   | 0.0049  | 1114.7003 | 558.3574 | 1114.6954 | 558.3550 | 2 | 26.77 |
|          | 8    | 18.2 | VVQGITGK                   | ITRAQ4plex@N-term;<br>ITRAQ4plex(K)@9                                                                                                      |                                                   | -0.0148 | 1187.7334 | 594.8740 | 1187.7481 | 594.8813 | 2 | 39.31 |
|          | 5.4  | 12.7 | WEDKVPVFNTIK               | ITRAQ4plex@N-term;<br>ITRAQ4plex(K)@4;<br>ITRAQ4plex(K)@12                                                                                 | missed K-V@4                                      | 0.0019  | 1907.0901 | 636.7040 | 1907.0882 | 636.7033 | 3 | 34.54 |
| LIC12575 |      |      |                            |                                                                                                                                            |                                                   |         |           |          |           |          |   |       |
|          | 5.63 | 9.8  | ADFLNALK                   | ITRAQ4plex@N-term;<br>ITRAQ4plex(K)@8                                                                                                      |                                                   | 0.0109  | 1178.7012 | 590.3578 | 1178.6903 | 590.3524 | 2 | 42.34 |
|          | 5.63 | 9.8  | ATISQDLLK                  | ITRAQ4plex@N-term;<br>ITRAQ4plex(K)@9                                                                                                      |                                                   | -0.0001 | 1275.7640 | 638.8893 | 1275.7642 | 638.8894 | 2 | 30.03 |
|          | 7.62 | 7.3  | IEALEASHR                  | ITRAQ4plex@N-term                                                                                                                          |                                                   | -0.0020 | 1168.6302 | 585.3224 | 1168.6322 | 585.3234 | 2 | 38.85 |
|          | 5.63 | 9.8  | IPDDTTLSEETNLLLEELTEKPEYTK | ITRAQ4plex@N-term;<br>ITRAQ4plex(K)@20;<br>ITRAQ4plex(K)@25                                                                                |                                                   | -0.0314 | 3339.6873 | 835.9291 | 3339.7186 | 835.9369 | 4 | 36.97 |
|          | 5.63 | 9.8  | LNALK                      | ITRAQ4plex@N-term;<br>Deamidated(N)@2;<br>ITRAQ4plex(K)@5                                                                                  | cleaved F-L@N-term                                | 0.0189  | 846.5607  | 424.2876 | 846.5418  | 424.2782 | 2 | 39.47 |
|          | 7.62 | 7.3  | LTTEETVKR                  | ITRAQ4plex@N-term;<br>ITRAQ4plex(K)@8                                                                                                      | missed K-R@8                                      | 0.0009  | 1363.7924 | 455.6047 | 1363.7915 | 455.6044 | 3 | 36.76 |
|          | 5.63 | 9.8  | NALDTHVQDQLR               | ITRAQ4plex@N-term                                                                                                                          |                                                   | 0.0060  | 1552.8140 | 518.6119 | 1552.8080 | 518.6099 | 3 | 31.72 |
|          | 7.62 | 7.3  | NALDTHVQDQLRLTQAK          | ITRAQ4plex@N-term;<br>ITRAQ4plex(T)@14;<br>ITRAQ4plex(K)@17                                                                                | missed R-L@12                                     | -0.0514 | 2382.2830 | 795.1016 | 2382.3345 | 795.1188 | 3 | 55.09 |
|          | 5.63 | 9.8  | QLVENTRNIRNLTARK           | ITRAQ4plex@N-term;<br>ITRAQ4plex(K)@16                                                                                                     | missed R-N@7; missed R-N@10; missed R-K@15        | -0.0324 | 2213.2637 | 738.7618 | 2213.2960 | 738.7726 | 3 | 41.94 |
|          | 5.63 | 9.8  | RYELAKSDTNFLK              | No ITRAQ4plex@N-term;<br>Methyl(E)@3; ITRAQ4plex(K)@6;<br>ITRAQ4plex(K)@13                                                                 | cleaved L-R@N-term; missed R-Y@1;<br>missed K-S@6 | -0.0252 | 1886.0253 | 629.6824 | 1886.0505 | 629.6908 | 3 | 54.70 |
|          | 5.63 | 9.8  | SSQSILPFNQANFFTK           | ITRAQ4plex@N-term;<br>ITRAQ4plex(K)@18                                                                                                     |                                                   | -0.0634 | 2274.1255 | 759.0491 | 2274.1888 | 759.0702 | 3 | 35.02 |
|          | 5.63 | 9.8  | TQAVKTYKQLVENTRNIR         | ITRAQ4plex@N-term;<br>Deamidated(O)@2;<br>ITRAQ4plex(K)@5;<br>ITRAQ4plex(K)@8;<br>Deamidated(Q)@9;<br>Deamidated(N)@13;<br>Oxidation(R)@15 | missed K-T@5; missed K-Q@8; missed R-N@15         | -0.0432 | 2612.4067 | 871.8095 | 2612.4499 | 871.8239 | 3 | 56.49 |
|          | 5.63 | 9.8  | VNFDLLR                    | ITRAQ4plex@N-term                                                                                                                          |                                                   | -0.0010 | 1246.7146 | 624.3646 | 1246.7156 | 624.3651 | 2 | 34.53 |
| LIC12618 |      |      |                            |                                                                                                                                            |                                                   |         |           |          |           |          |   |       |
|          | 2.01 | 3.3  | IGPPVVLFQEFK               | ITRAQ4plex@N-term;<br>ITRAQ4plex(K)@14                                                                                                     |                                                   | -0.0151 | 1861.0443 | 931.5294 | 1861.0593 | 931.5369 | 2 | 54.30 |
|          | 2.01 | 3.3  | LFPK                       | ITRAQ4plex@N-term;<br>ITRAQ4plex(K)@5                                                                                                      | cleaved N-L@N-term                                | 0.0208  | 848.5571  | 425.2858 | 848.5364  | 425.2755 | 2 | 37.89 |
|          | 2.01 | 3.3  | LGGGFK                     | ITRAQ4plex@N-term;<br>ITRAQ4plex(K)@6                                                                                                      | cleaved N-L@N-term                                | -0.0032 | 865.5234  | 433.7690 | 865.5265  | 433.7705 | 2 | 39.25 |
|          | 2.01 | 3.3  | TVLEIMKR                   | Carbamyli@N-term;<br>ITRAQ4plex(K)@7                                                                                                       | missed K-R@7                                      | 0.0350  | 1175.7168 | 588.8657 | 1175.6818 | 588.8482 | 2 | 45.07 |
|          | 2.01 | 3.3  | YGLT                       | ITRAQ4plex@N-term                                                                                                                          | cleaved A-Y@N-term; cleaved T-V@C-term            | 0.0027  | 596.3318  | 597.3391 | 596.3292  | 597.3364 | 1 | 59.75 |
| LIC12620 |      |      |                            |                                                                                                                                            |                                                   |         |           |          |           |          |   |       |
|          | 2.28 | 1.5  | ELPPEADGKPNK               | ITRAQ4plex@N-term;<br>ITRAQ4plex(K)@9;<br>ITRAQ4plex(K)@12                                                                                 |                                                   | -0.0192 | 1725.9435 | 576.3218 | 1725.9627 | 576.3282 | 3 | 27.79 |
|          | 2.28 | 1.5  | ETVPK                      | Glu->pyro-Glu@N-term;<br>ITRAQ4plex(K)@5                                                                                                   |                                                   | -0.0198 | 698.3887  | 699.3960 | 698.4085  | 699.4158 | 1 | 44.59 |
|          | 2.28 | 1.5  | GIFRAFVNI                  | ITRAQ4plex@N-term                                                                                                                          | cleaved I-L@C-term; missed R-A@4                  | -0.0220 | 1310.7072 | 656.3608 | 1310.7291 | 656.3718 | 2 | 41.17 |
|          | 2.28 | 1.5  | GMSGGVVAAPIWGR             | ITRAQ4plex@N-term                                                                                                                          |                                                   | 0.0017  | 1500.8010 | 751.4078 | 1500.7993 | 751.4069 | 2 | 31.86 |
|          | 2.28 | 1.5  | NEYEPIAEFYRFSRVV LNIK      | ITRAQ4plex@N-term;<br>Deamidated(N)@1;<br>Oxidation(P)@5;<br>Deamidated(N)@18;<br>ITRAQ4plex(K)@20                                         | missed R-F@11; missed R-V@14                      | -0.1179 | 2792.3450 | 699.0935 | 2792.4629 | 699.1230 | 4 | 44.17 |

|          |       |      |                     |                                                                       |                                                  |         |           |          |           |          |   |       |
|----------|-------|------|---------------------|-----------------------------------------------------------------------|--------------------------------------------------|---------|-----------|----------|-----------|----------|---|-------|
|          | 2.28  | 1.5  | SPNDSAFGDRLNRF      | ITRAQ4plex@N-term                                                     | cleaved P-Y@C-term; missed R-L@10; missed R-F@13 | 0.0532  | 1835.9568 | 612.9929 | 1835.9036 | 612.9752 | 3 | 27.75 |
| LIC12621 |       |      |                     |                                                                       |                                                  |         |           |          |           |          |   |       |
|          | 14    | 44.1 | EVTVSGTMIGNIK       | ITRAQ4plex@N-term; ITRAQ4plex(K)@13                                   |                                                  | 0.0058  | 1635.9167 | 818.9656 | 1635.9109 | 818.9627 | 2 | 52.26 |
|          | 9.52  | 31.6 | FYIAGSLR            | ITRAQ4plex@N-term                                                     |                                                  | 0.0028  | 1069.6071 | 535.8108 | 1069.6042 | 535.8094 | 2 | 43.12 |
|          | 14    | 44.1 | GDIIAPALHLAK        | ITRAQ4plex@N-term; ITRAQ4plex(K)@12                                   | cleaved L-G@N-term                               | -0.0039 | 1505.9135 | 502.9784 | 1505.9173 | 502.9797 | 3 | 32.50 |
|          | 14    | 44.1 | GNITITGGQK          | ITRAQ4plex@N-term; ITRAQ4plex(K)@10                                   |                                                  | 0.0017  | 1275.7407 | 638.8776 | 1275.7390 | 638.8768 | 2 | 26.36 |
|          | 14    | 44.1 | GSIFEGK             | No ITRAQ4plex@N-term; ITRAQ4plex(K)@7                                 | cleaved P-G@N-term                               | 0.0304  | 880.5080  | 441.2613 | 880.4776  | 441.2461 | 2 | 25.12 |
|          | 9.52  | 31.6 | IFEGK               | ITRAQ4plex@N-term; ITRAQ4plex(K)@5                                    | cleaved S-I@N-term                               | 0.0201  | 880.5463  | 441.2804 | 880.5262  | 441.2704 | 2 | 45.47 |
|          | 9.52  | 31.6 | IVEESFGGTR          | ITRAQ4plex@N-term                                                     |                                                  | -0.0023 | 1237.6403 | 619.8274 | 1237.6425 | 619.8285 | 2 | 39.66 |
|          | 14    | 44.1 | KIVEESFGGTR         | ITRAQ4plex@N-term; ITRAQ4plex(K)@1                                    | missed K-I@1                                     | 0.0035  | 1509.8430 | 504.2883 | 1509.8395 | 504.2871 | 3 | 39.24 |
|          | 14    | 44.1 | LGDIAPALHLAK        | ITRAQ4plex@N-term; ITRAQ4plex(K)@13                                   | cleaved L-L@N-term                               | -0.0085 | 1618.9929 | 540.6716 | 1619.0014 | 540.6744 | 3 | 35.35 |
|          | 14    | 44.1 | LLGDIAPALHLAK       | ITRAQ4plex@N-term; ITRAQ4plex(K)@14                                   |                                                  | 0.0000  | 1732.0854 | 578.3691 | 1732.0855 | 578.3691 | 3 | 37.60 |
|          | 14    | 44.1 | TDDTLYIGETGK        | ITRAQ4plex@N-term; ITRAQ4plex(K)@12                                   |                                                  | -0.0011 | 1599.8225 | 800.9185 | 1599.8236 | 800.9191 | 2 | 29.12 |
|          | 14    | 44.1 | TNISAREVTVSGTMIGNIK | ITRAQ4plex@N-term; Phospho(T)@13; ITRAQ4plex(K)@19                    | missed R-E@6                                     | 0.0658  | 2358.2881 | 787.1033 | 2358.2222 | 787.0813 | 3 | 41.29 |
| LIC12629 |       |      |                     |                                                                       |                                                  |         |           |          |           |          |   |       |
|          | 4.95  | 8.0  | FFDLILK             | ITRAQ4plex@N-term; ITRAQ4plex(K)@7                                    |                                                  | 0.0052  | 1182.7308 | 592.3727 | 1182.7256 | 592.3701 | 2 | 50.24 |
|          | 4.95  | 8.0  | GAMQSFRRER          | No ITRAQ4plex@N-term; Dehiomethyl(M)@3                                | missed R-E@7                                     | 0.0265  | 1032.5366 | 517.2756 | 1032.5101 | 517.2623 | 2 | 41.52 |
|          | 4.95  | 8.0  | IGLVTK              | ITRAQ4plex@N-term; ITRAQ4plex(K)@6                                    |                                                  | 0.0034  | 917.6187  | 459.8166 | 917.6153  | 459.8149 | 2 | 38.91 |
|          | 4.95  | 8.0  | IVVSGIK             | ITRAQ4plex@N-term; ITRAQ4plex(K)@7                                    |                                                  | -0.0060 | 1002.6622 | 502.3383 | 1002.6681 | 502.3413 | 2 | 40.16 |
|          | 4.95  | 8.0  | LPSIIQQGHTR         | ITRAQ4plex@N-term                                                     |                                                  | 0.0172  | 1321.7760 | 441.5993 | 1321.7588 | 441.5935 | 3 | 43.01 |
|          | 4.95  | 8.0  | TAILYLRPEK          | ITRAQ4plex@N-term; ITRAQ4plex(K)@11                                   |                                                  | -0.0108 | 1604.9386 | 535.9868 | 1604.9494 | 535.9904 | 3 | 42.63 |
| LIC12636 |       |      |                     |                                                                       |                                                  |         |           |          |           |          |   |       |
|          | 8.35  | 8.9  | ALFDNLTPLYPNER      | ITRAQ4plex@N-term; Oxidation(P)@11; Deamidated(N)@12                  |                                                  | 0.0569  | 1822.9792 | 912.4969 | 1822.9223 | 912.4684 | 2 | 50.76 |
|          | 13.7  | 16.8 | AYNQVIPTSGK         | ITRAQ4plex@N-term; ITRAQ4plex(K)@11                                   |                                                  | -0.0063 | 1464.8118 | 733.4131 | 1464.8180 | 733.4163 | 2 | 28.17 |
|          | 13.7  | 16.8 | DGQVHAAGVMEK        | ITRAQ4plex@N-term; ITRAQ4plex(K)@12                                   |                                                  | -0.0157 | 1528.7754 | 510.5991 | 1528.7911 | 510.6043 | 3 | 27.09 |
|          | 13.7  | 16.8 | DGQVHAAGVMEKLP      | ITRAQ4plex@N-term; Oxidation(M)@10; ITRAQ4plex(K)@12                  | cleaved P-D@C-term; missed K-L@12                | -0.0218 | 1754.9011 | 585.9743 | 1754.9229 | 585.9816 | 3 | 31.14 |
|          | 8.35  | 8.9  | FFAMLR              | ITRAQ4plex@N-term                                                     |                                                  | 0.0084  | 927.5206  | 464.7676 | 927.5122  | 464.7634 | 2 | 46.90 |
|          | 13.7  | 16.8 | GEVVSSTFDEPAQR      | ITRAQ4plex@N-term                                                     |                                                  | -0.0177 | 1664.7950 | 833.4048 | 1664.8128 | 833.4137 | 2 | 28.42 |
|          | 13.7  | 16.8 | GTGNMEIHLDR         | ITRAQ4plex@N-term                                                     |                                                  | -0.0011 | 1385.6832 | 462.9017 | 1385.6843 | 462.9021 | 3 | 29.90 |
|          | 13.7  | 16.8 | HVRGEVVSSTF         | No ITRAQ4plex@N-term; Deamidated(R)@3                                 | cleaved F-D@C-term; missed R-G@3                 | 0.0163  | 1217.6204 | 609.8174 | 1217.6041 | 609.8093 | 2 | 61.08 |
|          | 8.35  | 8.9  | ILDLMCPIGK          | ITRAQ4plex@N-term; Methylthio(C)@6; ITRAQ4plex(K)@10                  |                                                  | 0.0051  | 1435.7897 | 718.9021 | 1435.7845 | 718.8995 | 2 | 51.15 |
|          | 13.7  | 16.8 | LPDGYGFLR           | ITRAQ4plex@N-term                                                     |                                                  | 0.0093  | 1180.6456 | 591.3301 | 1180.6362 | 591.3254 | 2 | 32.86 |
|          | 13.7  | 16.8 | PAIDINKSGTRK        | ITRAQ4plex@N-term; Deamidated(N)@6; ITRAQ4plex(K)@7; ITRAQ4plex(K)@12 | cleaved F-P@N-term; missed K-S@7; missed R-K@11  | 0.0495  | 1732.0704 | 578.3641 | 1732.0209 | 578.3476 | 3 | 38.73 |
|          | 8.35  | 8.9  | QNLIFAILQAQAER      | ITRAQ4plex@N-term; Deamidated(Q)@9                                    |                                                  | -0.0158 | 1758.9592 | 587.3270 | 1758.9750 | 587.3323 | 3 | 46.76 |
|          | 13.7  | 16.8 | TGDTVEGQIRPPK       | ITRAQ4plex@N-term; ITRAQ4plex(K)@13                                   |                                                  | -0.0147 | 1684.9204 | 562.6474 | 1684.9352 | 562.6523 | 3 | 28.34 |
| LIC12695 |       |      |                     |                                                                       |                                                  |         |           |          |           |          |   |       |
|          | 1.52  | 2.7  | EEFEEAEITNQI        | ITRAQ4plex@N-term; Deamidated(Q)@11                                   | cleaved I-A@C-term                               | 0.0328  | 1595.7653 | 798.8899 | 1595.7324 | 798.8735 | 2 | 48.77 |
|          | 1.52  | 2.7  | MESI                | ITRAQ4plex@N-term                                                     | cleaved Y-M@N-term; cleaved I-N@C-term           | 0.0458  | 622.3576  | 623.3649 | 622.3118  | 623.3191 | 1 | 59.66 |
|          | 1.52  | 2.7  | QTNEENTPGVVK        | Gln->pyro-Glu@N-term; ITRAQ4plex(K)@12                                |                                                  | -0.0079 | 1441.7091 | 721.8618 | 1441.7171 | 721.8658 | 2 | 35.02 |
| LIC12701 |       |      |                     |                                                                       |                                                  |         |           |          |           |          |   |       |
|          | 17.37 | 17.5 | AFQMDLK             | ITRAQ4plex@N-term; Oxidation(M)@4; ITRAQ4plex(K)@7                    | cleaved T-A@N-term                               | 0.0451  | 1155.6653 | 578.8399 | 1155.6202 | 578.8174 | 2 | 34.41 |

|          |      |                             |                                                                                 |                                                          |         |           |          |           |          |   |       |
|----------|------|-----------------------------|---------------------------------------------------------------------------------|----------------------------------------------------------|---------|-----------|----------|-----------|----------|---|-------|
| 17.37    | 17.5 | AYLHELEYEIVR                | ITRAQ4plex@N-term                                                               |                                                          | -0.0156 | 1677.8691 | 560.2970 | 1677.8848 | 560.3022 | 3 | 37.74 |
| 17.37    | 17.5 | DTIVLETGSWAK                | ITRAQ4plex@N-term;<br>ITRAQ4plex(K)@12                                          |                                                          | -0.9804 | 1605.9006 | 803.9576 | 1606.8810 | 804.4478 | 2 | 48.44 |
| 17.37    | 17.5 | EIGHGNLAER                  | Glu->pyro-Glu@N-term                                                            |                                                          | 0.0043  | 1076.5406 | 539.2776 | 1076.5363 | 539.2754 | 2 | 26.74 |
| 17.37    | 17.5 | EILNSDLDLVVAGTK             | ITRAQ4plex@N-term;<br>ITRAQ4plex(K)@15                                          |                                                          | -0.0245 | 1874.0359 | 625.6859 | 1874.0604 | 625.6941 | 3 | 59.38 |
| 16.94    | 13.3 | EQVLTKGRFDGRKL<br>DEIR      | Glu->pyro-Glu@N-term;<br>ITRAQ4plex(K)@6;<br>ITRAQ4plex(K)@14                   | missed K-G@6; missed R-F@9; missed R-K@13; missed K-L@14 | -0.0072 | 2530.4153 | 844.4790 | 2530.4223 | 844.4814 | 3 | 53.12 |
| 17.37    | 17.5 | EVVEFFKDTIEDSDK             | ITRAQ4plex@N-term;<br>ITRAQ4plex(K)@7;<br>ITRAQ4plex(K)@15                      |                                                          | 0.0243  | 2232.1770 | 745.0663 | 2232.1527 | 745.0582 | 3 | 36.42 |
| 17.37    | 17.5 | FHILDIMEK                   | ITRAQ4plex@N-term;<br>ITRAQ4plex(K)@9                                           |                                                          | 0.0048  | 1432.8040 | 478.6086 | 1432.7992 | 478.6070 | 3 | 35.12 |
| 17.37    | 17.5 | FPGGYFK                     | ITRAQ4plex@N-term;<br>ITRAQ4plex(K)@7                                           |                                                          | 0.0125  | 1102.6180 | 552.3163 | 1102.6055 | 552.3100 | 2 | 31.70 |
| 17.37    | 17.5 | GISELTGAELYIEDDG<br>K       | ITRAQ4plex@N-term;<br>ITRAQ4plex(K)@17                                          |                                                          | 0.0244  | 2097.0964 | 700.0394 | 2097.0721 | 700.0313 | 3 | 46.98 |
| 17.37    | 17.5 | GITAFQMDLK                  | ITRAQ4plex@N-term;<br>ITRAQ4plex(K)@10                                          |                                                          | 0.0284  | 1410.8069 | 706.4107 | 1410.7785 | 706.3965 | 2 | 35.05 |
| 16.94    | 13.3 | GRREIGHGNLAER               | ITRAQ4plex@N-term;<br>Deamidated(R)@2;<br>Deamidated(R)@3;<br>Deamidated(N)@9   | cleaved P-G@N-term; missed R-R@2;<br>missed R-E@3        | -0.0595 | 1610.7653 | 537.9290 | 1610.8247 | 537.9488 | 3 | 34.55 |
| 16.94    | 13.3 | HTISGQYGR                   | ITRAQ4plex@N-term;<br>ITRAQ4plex(S)@4                                           | cleaved T-H@N-term                                       | -0.0438 | 1305.6595 | 436.2271 | 1305.7033 | 436.2417 | 3 | 34.62 |
| 17.37    | 17.5 | IADFGAFVEILPGK              | ITRAQ4plex@N-term;<br>ITRAQ4plex(K)@14                                          |                                                          | 0.0457  | 1764.0524 | 589.0247 | 1764.0065 | 589.0095 | 3 | 41.67 |
| 17.37    | 17.5 | IGELIGPGGK                  | ITRAQ4plex@N-term;<br>ITRAQ4plex(K)@10                                          |                                                          | -5.0647 | 1222.6783 | 612.3464 | 1227.7431 | 614.8788 | 2 | 29.93 |
| 16.94    | 13.3 | LTTANQTPDK                  | ITRAQ4plex@N-term;<br>ITRAQ4plex(K)@10                                          |                                                          | -0.0019 | 1375.7532 | 688.8839 | 1375.7551 | 688.8848 | 2 | 33.78 |
| 16.94    | 13.3 | LTTANQTPDKTARNK<br>EI       | ITRAQ4plex@N-term;<br>ITRAQ4plex(K)@10;<br>Oxidation(N)@14;<br>ITRAQ4plex(K)@15 | cleaved I-S@C-term; missed K-T@10;<br>missed R-N@13      | -0.1186 | 2348.1838 | 783.7352 | 2348.3025 | 783.7748 | 3 | 32.24 |
| 17.37    | 17.5 | LVLPKPDEFPYVIR              | ITRAQ4plex@N-term;<br>ITRAQ4plex(K)@5                                           |                                                          | -0.0074 | 1973.1520 | 658.7246 | 1973.1594 | 658.7271 | 3 | 35.52 |
| 17.37    | 17.5 | MHTHISGQYGRDITVL<br>ETGSWAK | ITRAQ4plex@N-term;<br>Oxidation(M)@1;<br>Oxidation(H)@3;<br>ITRAQ4plex(K)@23    | missed R-D@11                                            | 0.0140  | 2870.4617 | 718.6227 | 2870.4476 | 718.6192 | 4 | 42.17 |
| 17.37    | 17.5 | PAFSVGEVRRSSGPG<br>R        | ITRAQ4plex@N-term;<br>Oxidation(P)@1                                            | cleaved F-P@N-term; missed R-R@9;<br>missed R-S@10       | 0.0194  | 1817.9813 | 607.0010 | 1817.9618 | 606.9946 | 3 | 29.45 |
| 16.94    | 13.3 | REIGHGNLAER                 | Carbamyl@N-term                                                                 | missed R-E@1                                             | 0.0028  | 1293.6566 | 432.2261 | 1293.6538 | 432.2252 | 3 | 35.67 |
| 17.37    | 17.5 | REIGHGNLAERALK              | ITRAQ4plex@N-term;<br>Oxidation(H)@5;<br>ITRAQ4plex(K)@14                       | missed R-E@1; missed R-A@11                              | -0.0068 | 1867.0563 | 623.3594 | 1867.0632 | 623.3617 | 3 | 43.78 |
| 16.94    | 13.3 | SFMLHYNFPAFSVGE<br>VR       | ITRAQ4plex@N-term                                                               |                                                          | 0.0135  | 2144.0769 | 715.6996 | 2144.0635 | 715.6951 | 3 | 54.82 |
| 17.37    | 17.5 | SISVEINPLPGPHGSA<br>VFTR    | ITRAQ4plex@N-term;<br>ITRAQ4plex(S)@15                                          |                                                          | -0.0049 | 2365.2949 | 592.3310 | 2365.2998 | 592.3322 | 4 | 34.22 |
| 16.94    | 13.3 | THTISGQYGR                  | ITRAQ4plex@N-term                                                               | cleaved M-T@N-term                                       | -0.0031 | 1262.6459 | 421.8892 | 1262.6489 | 421.8903 | 3 | 35.10 |
| 17.37    | 17.5 | VRDEELLSK                   | ITRAQ4plex@N-term;<br>ITRAQ4plex(K)@9                                           | missed R-D@2                                             | -0.0121 | 1375.7794 | 459.6004 | 1375.7915 | 459.6044 | 3 | 30.07 |
| 17.37    | 17.5 | VTGVSFVLESVFEQ<br>AQR       | ITRAQ4plex@N-term                                                               |                                                          | -0.0097 | 2154.0981 | 719.0400 | 2154.1079 | 719.0432 | 3 | 46.57 |
| 17.37    | 17.5 | VTISGSNQESA EK              | ITRAQ4plex@N-term;<br>ITRAQ4plex(K)@13                                          |                                                          | 0.0081  | 1636.8594 | 819.4370 | 1636.8512 | 819.4329 | 2 | 26.05 |
| 17.37    | 17.5 | YAVLSDIAGLEDHFGD<br>MDCK    | ITRAQ4plex@N-term;<br>Methylthio(C)@19;<br>ITRAQ4plex(K)@20                     |                                                          | 0.0159  | 2532.1738 | 845.0652 | 2532.1579 | 845.0599 | 3 | 38.29 |
| LIC12706 |      |                             |                                                                                 |                                                          |         |           |          |           |          |   |       |
| 3.06     | 4.3  | DAMSIDLGK                   | ITRAQ4plex@N-term;<br>ITRAQ4plex(K)@9                                           |                                                          | -1.9585 | 1234.7043 | 618.3594 | 1236.6628 | 619.3387 | 2 | 30.24 |
| 3.06     | 4.3  | DPVGA                       | No ITRAQ4plex@N-term                                                            | cleaved I-D@N-term; cleaved A-C@C-term                   | 0.0384  | 457.2557  | 458.2630 | 457.2173  | 458.2245 | 1 | 0.29  |
| 2.89     | 2.4  | EGELTHGYFQR                 | ITRAQ4plex@N-term                                                               |                                                          | 0.0259  | 1479.7487 | 494.2568 | 1479.7228 | 494.2482 | 3 | 41.50 |
| 3.06     | 4.3  | EKPVELSR                    | ITRAQ4plex@N-term;<br>ITRAQ4plex(K)@2                                           |                                                          | -0.0048 | 1244.7284 | 415.9167 | 1244.7332 | 415.9183 | 3 | 27.97 |
| 2.89     | 2.4  | GQILK                       | ITRAQ4plex@N-term;<br>ITRAQ4plex(K)@5                                           | cleaved A-G@N-term                                       | 0.0307  | 845.5885  | 423.8015 | 845.5578  | 423.7862 | 2 | 40.38 |
| 3.06     | 4.3  | GVRIQSIVR                   | ITRAQ4plex@N-term;<br>Deamidated(R)@3;<br>Deamidated(Q)@5                       | missed R-I@3                                             | -0.0708 | 1172.6292 | 587.3218 | 1172.6999 | 587.3572 | 2 | 44.45 |
| 2.89     | 2.4  | IVGILK                      | ITRAQ4plex@N-term;<br>ITRAQ4plex(K)@6                                           |                                                          | -0.0259 | 929.6258  | 465.8202 | 929.6517  | 465.8331 | 2 | 43.29 |

|          |      |      |                          |                                                                              |                                        |         |           |          |           |          |   |       |
|----------|------|------|--------------------------|------------------------------------------------------------------------------|----------------------------------------|---------|-----------|----------|-----------|----------|---|-------|
|          | 3.06 | 4.3  | SEGIKDLTLEIYSQD<br>DLAK  | ITRAQ4plex@N-term;<br>ITRAQ4plex(K)@5;<br>ITRAQ4plex(K)@20                   |                                        | -0.0098 | 2698.4182 | 900.4800 | 2698.4278 | 900.4832 | 3 | 39.11 |
|          | 3.06 | 4.3  | SGLEESSELEK              | ITRAQ4plex@N-term;<br>ITRAQ4plex(K)@11                                       | cleaved K-P@C-term                     | 0.0901  | 1494.8558 | 748.4352 | 1494.7657 | 748.3901 | 2 | 49.43 |
|          | 3.06 | 4.3  | TVTQYNAELASP             | ITRAQ4plex@N-term                                                            | cleaved P-E@C-term                     | 0.0786  | 1436.8055 | 719.4100 | 1436.7269 | 719.3707 | 2 | 58.03 |
|          | 2.89 | 2.4  | VEGIMPR                  | ITRAQ4plex@N-term                                                            |                                        | 0.1180  | 944.6415  | 473.3280 | 944.5235  | 473.2690 | 2 | 41.07 |
|          | 3.06 | 4.3  | VEGIMPRREQNPGEK          | ITRAQ4plex@N-term;<br>Dethiomethyl(M)@5;<br>ITRAQ4plex(K)@15                 | missed R-R@7; missed R-E@8             | 0.0113  | 1979.0905 | 660.7041 | 1979.0792 | 660.7003 | 3 | 40.56 |
| LIC12725 |      |      |                          |                                                                              |                                        |         |           |          |           |          |   |       |
|          | 4.11 | 11.3 | ATEIAIALSESAPLALS<br>ELK | ITRAQ4plex@N-term;<br>ITRAQ4plex(K)@20                                       |                                        | -1.0624 | 2313.2615 | 772.0944 | 2314.3239 | 772.4486 | 3 | 54.69 |
|          | 2.6  | 3.8  | ELFGTHIANR               | CarbamyI@N-term                                                              |                                        | -0.0050 | 1199.5997 | 600.8071 | 1199.6047 | 600.8096 | 2 | 42.33 |
|          | 4.11 | 11.3 | GFIDRDTIDLGSNGK          | ITRAQ4plex@N-term;<br>ITRAQ4plex(K)@15                                       | cleaved M-G@N-term; missed R-D@5       | -0.0098 | 1894.9894 | 632.6704 | 1894.9992 | 632.6737 | 3 | 31.61 |
|          | 4.11 | 11.3 | IIEGLETPEQNKPR           | ITRAQ4plex@N-term;<br>ITRAQ4plex(K)@13                                       |                                        | -0.0069 | 2024.1442 | 675.7220 | 2024.1510 | 675.7243 | 3 | 32.95 |
|          | 4.11 | 11.3 | LLFLAETLNGEEAFR          | ITRAQ4plex@N-term;<br>Deamidated(N)@9                                        |                                        | 0.0268  | 1867.0117 | 934.5131 | 1866.9849 | 934.4997 | 2 | 50.64 |
|          | 2.6  | 3.8  | VVILTGK                  | ITRAQ4plex@N-term;<br>ITRAQ4plex(K)@7                                        |                                        | 0.0005  | 1016.6843 | 509.3494 | 1016.6838 | 509.3492 | 2 | 40.71 |
| LIC12730 |      |      |                          |                                                                              |                                        |         |           |          |           |          |   |       |
|          | 2    | 1.5  | AIYRGISDLLGRLGPR         | ITRAQ4plex@N-term;<br>Deamidated(R)@4;<br>Oxidation(D)@8;<br>Oxidation(P)@15 | missed R-G@4; missed R-L@12            | 0.0106  | 1933.0973 | 967.5559 | 1933.0867 | 967.5506 | 2 | 57.45 |
|          | 2    | 1.5  | GILR                     | ITRAQ4plex@N-term                                                            | cleaved V-G@N-term                     | 0.0481  | 601.4515  | 602.4587 | 601.4033  | 602.4106 | 1 | 53.83 |
|          | 2    | 1.5  | GISDLLGRLGPR             | ITRAQ4plex@N-term;<br>Oxidation(D)@4                                         | missed R-L@8                           | -0.0612 | 1412.7609 | 707.3877 | 1412.8221 | 707.4183 | 2 | 52.23 |
|          | 2    | 1.5  | LLTSLR                   | ITRAQ4plex@N-term                                                            | cleaved P-L@N-term                     | 0.0429  | 845.5885  | 423.8015 | 845.5456  | 423.7801 | 2 | 40.38 |
|          | 2    | 1.5  | SLRPLLTSLR               | CarbamyI@N-term                                                              |                                        | 0.0802  | 1197.7996 | 599.9070 | 1197.7194 | 599.8670 | 2 | 46.15 |
|          | 2    | 1.5  | VRDRSGR                  | ITRAQ4plex@N-term;<br>Oxidation(R)@2; Oxidation(R)@7                         | missed R-D@2; missed R-S@4             | 0.0054  | 1020.5601 | 511.2873 | 1020.5546 | 511.2846 | 2 | 41.43 |
| LIC12739 |      |      |                          |                                                                              |                                        |         |           |          |           |          |   |       |
|          | 3.52 | 16.9 | DLRGRTARMTLK             | ITRAQ4plex@N-term;<br>Deamidated(R)@7;<br>ITRAQ4plex(K)@11                   | missed R-G@3; missed R-M@7             | -0.0667 | 1549.8187 | 775.9166 | 1549.8854 | 775.9500 | 2 | 56.24 |
|          | 3.52 | 16.9 | ELKDLRGTAR               | ITRAQ4plex@N-term;<br>ITRAQ4plex(K)@3                                        | cleaved I-E@N-term; missed R-G@6       | -0.0689 | 1445.7870 | 723.9008 | 1445.8558 | 723.9352 | 2 | 58.51 |
|          | 3.52 | 16.9 | FADATLDHQWIHTDP<br>DK    | ITRAQ4plex@N-term;<br>ITRAQ4plex(K)@17                                       |                                        | -0.0274 | 2297.1047 | 766.7089 | 2297.1320 | 766.7180 | 3 | 35.36 |
|          | 3.52 | 16.9 | GTAR                     | No ITRAQ4plex@N-term                                                         |                                        | 0.0304  | 403.2484  | 404.2556 | 403.2179  | 404.2252 | 1 | 47.41 |
|          | 3.52 | 16.9 | LKAELIELK                | ITRAQ4plex@N-term;<br>ITRAQ4plex(K)@2;<br>ITRAQ4plex(K)@9                    | missed K-A@2                           | -0.0129 | 1487.9523 | 496.9914 | 1487.9652 | 496.9957 | 3 | 35.43 |
| LIC12742 |      |      |                          |                                                                              |                                        |         |           |          |           |          |   |       |
|          | 2    | 5.9  | FGAERPSFSR               | ITRAQ4plex@N-term                                                            |                                        | -0.0013 | 1393.7211 | 465.5810 | 1393.7224 | 465.5814 | 3 | 29.94 |
|          | 1.7  | 5.9  | GLSDLSK                  | ITRAQ4plex@N-term;<br>Oxidation(D)@4;<br>ITRAQ4plex(K)@7                     | cleaved M-G@N-term                     | -0.0320 | 1022.5532 | 512.2839 | 1022.5852 | 512.2999 | 2 | 45.69 |
| LIC12743 |      |      |                          |                                                                              |                                        |         |           |          |           |          |   |       |
|          | 2    | 7.3  | EDGE                     | Glu->pyro-Glu@N-term                                                         | cleaved L-E@N-term; cleaved E-S@C-term | -0.0397 | 430.0939  | 431.1011 | 430.1336  | 431.1409 | 1 | 19.64 |
|          | 2    | 7.3  | EPRFEVNYLLR              | ITRAQ4plex@N-term;<br>Deamidated(R)@3;<br>Oxidation(N)@7; Oxidation(Y)@8     | missed R-F@3                           | 0.0068  | 1611.8446 | 538.2888 | 1611.8379 | 538.2866 | 3 | 29.96 |
|          | 2    | 7.3  | ILMPDNFQGHPLR            | ITRAQ4plex@N-term                                                            |                                        | 0.0051  | 1680.8943 | 561.3054 | 1680.8892 | 561.3037 | 3 | 32.61 |
| LIC12744 |      |      |                          |                                                                              |                                        |         |           |          |           |          |   |       |
|          | 4.02 | 6.9  | DIPIGEDGSVLHR            | No ITRAQ4plex@N-term                                                         | cleaved F-D@N-term                     | -0.0095 | 1406.7059 | 704.3602 | 1406.7154 | 704.3650 | 2 | 33.55 |
|          | 4.02 | 6.9  | GGISA                    | No ITRAQ4plex@N-term                                                         | cleaved I-G@N-term; cleaved A-E@C-term | 0.0052  | 403.2119  | 404.2191 | 403.2067  | 404.2140 | 1 | 46.98 |
|          | 4.02 | 6.9  | GLKPAIEEFNSLLK           | ITRAQ4plex@N-term;<br>ITRAQ4plex(K)@3;<br>ITRAQ4plex(K)@15                   |                                        | -0.0199 | 2103.2471 | 702.0896 | 2103.2669 | 702.0962 | 3 | 39.74 |
|          | 4.02 | 6.9  | IGGLEK                   | ITRAQ4plex@N-term;<br>ITRAQ4plex(K)@6                                        |                                        | 0.0069  | 903.5703  | 452.7924 | 903.5633  | 452.7889 | 2 | 28.49 |
|          | 4.02 | 6.9  | LTGARLTTTFCR             | No ITRAQ4plex@N-term;<br>Methylthio(C)@11                                    | missed R-L@5                           | 0.0392  | 1384.7347 | 693.3746 | 1384.6955 | 693.3550 | 2 | 28.90 |
|          | 4.02 | 6.9  | VDFDIPIGEDGSVLHR<br>SLVR | ITRAQ4plex@N-term;<br>Deamidated(R)@16                                       | missed R-S@16                          | -0.0144 | 2368.2366 | 790.4194 | 2368.2509 | 790.4242 | 3 | 36.08 |
|          | 4.02 | 6.9  | VYNNMEELIYHFK            | ITRAQ4plex@N-term;<br>ITRAQ4plex(K)@13                                       |                                        | 0.0140  | 1987.0258 | 663.3492 | 1987.0117 | 663.3445 | 3 | 37.99 |

|          |       |      |                          |                                                                                                     |                                        |         |           |          |           |          |   |       |
|----------|-------|------|--------------------------|-----------------------------------------------------------------------------------------------------|----------------------------------------|---------|-----------|----------|-----------|----------|---|-------|
|          | 4.02  | 6.9  | YEKTAEHFEQK              | ITRAQ4plex@N-term;<br>Oxidation(Y)@1;<br>ITRAQ4plex(K)@3;<br>ITRAQ4plex(K)@11                       | cleaved M-Y@N-term; missed K-T@3       | -0.0427 | 1856.9207 | 929.4676 | 1856.9634 | 929.4890 | 2 | 43.83 |
| LIC12745 |       |      |                          |                                                                                                     |                                        |         |           |          |           |          |   |       |
|          | 4     | 15.6 | LGIHTGQTTSDQK            | ITRAQ4plex@N-term;<br>ITRAQ4plex(K)@13                                                              |                                        | 0.0028  | 1672.9015 | 558.6411 | 1672.8988 | 558.6402 | 3 | 26.92 |
|          | 4     | 15.6 | SLILPCLYLQR              | ITRAQ4plex@N-term;<br>Methylthio(C)@6                                                               |                                        | -0.0376 | 1620.8842 | 811.4493 | 1620.9217 | 811.4681 | 2 | 40.88 |
| LIC12746 |       |      |                          |                                                                                                     |                                        |         |           |          |           |          |   |       |
|          | 2     | 2.9  | LKPPFPAVSGLYR            | ITRAQ4plex@N-term;<br>ITRAQ4plex(K)@2                                                               |                                        | -0.0160 | 1732.0120 | 578.3446 | 1732.0279 | 578.3499 | 3 | 51.74 |
| LIC12750 |       |      |                          |                                                                                                     |                                        |         |           |          |           |          |   |       |
|          | 2.06  | 1.8  | IFLNGK                   | ITRAQ4plex@N-term;<br>ITRAQ4plex(K)@6                                                               | cleaved M-I@N-term                     | -0.0067 | 978.6039  | 490.3092 | 978.6106  | 490.3126 | 2 | 29.80 |
|          | 2.06  | 1.8  | IGAIGK                   | ITRAQ4plex@N-term;<br>ITRAQ4plex(K)@6                                                               | cleaved F-I@N-term                     | 0.0107  | 845.5685  | 423.7915 | 845.5578  | 423.7862 | 2 | 30.74 |
|          | 2.06  | 1.8  | IGDLGMLLGIAFVFW          | ITRAQ4plex@N-term;<br>Oxidation(D)@3                                                                | cleaved W-Y@C-term                     | -0.0513 | 1810.9301 | 906.4723 | 1810.9813 | 906.4980 | 2 | 8.52  |
|          | 2.06  | 1.8  | ILTSYFGPVFIR             | No ITRAQ4plex@N-term                                                                                |                                        | -0.0231 | 1411.7633 | 706.8889 | 1411.7864 | 706.9005 | 2 | 37.55 |
|          | 2.06  | 1.8  | NLVLAEILLIF              | ITRAQ4plex@N-term                                                                                   | cleaved L-N@N-term; cleaved F-L@C-term | 0.0129  | 1514.9323 | 758.4734 | 1514.9194 | 758.4670 | 2 | 46.45 |
|          | 2.06  | 1.8  | SGIFIAR                  | No ITRAQ4plex@N-term                                                                                | cleaved I-S@N-term                     | -0.0106 | 762.4283  | 763.4355 | 762.4388  | 763.4461 | 1 | 50.29 |
|          | 2.06  | 1.8  | VPDSEESHTGIK             | ITRAQ4plex@N-term;<br>ITRAQ4plex(K)@12                                                              |                                        | -0.0165 | 1585.8026 | 529.6082 | 1585.8191 | 529.6137 | 3 | 26.82 |
| LIC12776 |       |      |                          |                                                                                                     |                                        |         |           |          |           |          |   |       |
|          | 2     | 10.6 | VLLFAESNNKVHIGQP<br>ELK  | ITRAQ4plex@N-term;<br>ITRAQ4plex(S)@7;<br>ITRAQ4plex(K)@10;<br>Oxidation(H)@12;<br>ITRAQ4plex(K)@19 | missed K-V@10                          | 0.0076  | 2727.5847 | 682.9034 | 2727.5771 | 682.9015 | 4 | 37.45 |
|          | 2     | 10.6 | VTQDQEFLETK              | ITRAQ4plex@N-term;<br>ITRAQ4plex(K)@11                                                              |                                        | 0.0082  | 1624.8634 | 813.4390 | 1624.8552 | 813.4349 | 2 | 29.33 |
| LIC12795 |       |      |                          |                                                                                                     |                                        |         |           |          |           |          |   |       |
|          | 15.88 | 20.4 | AATVALEGIKMDTG<br>WDWEK  | No ITRAQ4plex@N-term;<br>ITRAQ4plex(K)@12;<br>ITRAQ4plex(K)@21                                      | cleaved F-A@N-term; missed K-M@12      | 0.0342  | 2607.3589 | 870.1269 | 2607.3247 | 870.1155 | 3 | 48.99 |
|          | 15.88 | 20.4 | AFESFK                   | ITRAQ4plex@N-term;<br>ITRAQ4plex(K)@6                                                               | cleaved L-A@N-term                     | 0.0072  | 1015.5654 | 508.7900 | 1015.5582 | 508.7864 | 2 | 30.68 |
|          | 23.7  | 30.6 | ALGPYPGHHLGK             | Carbamyl@N-term;<br>ITRAQ4plex(K)@12                                                                |                                        | 0.0129  | 1432.7826 | 478.6015 | 1432.7697 | 478.5972 | 3 | 41.71 |
|          | 23.7  | 30.6 | ALLDETGIK                | ITRAQ4plex@N-term;<br>ITRAQ4plex(K)@9                                                               |                                        | -0.0016 | 1246.7361 | 624.3753 | 1246.7376 | 624.3761 | 2 | 41.96 |
|          | 15.88 | 20.4 | AMLMFDNPGMK              | ITRAQ4plex@N-term;<br>ITRAQ4plex(K)@11                                                              |                                        | 0.0032  | 1541.7681 | 771.8913 | 1541.7648 | 771.8897 | 2 | 33.13 |
|          | 15.88 | 20.4 | ANAIMDLK                 | ITRAQ4plex@N-term;<br>Oxidation(M)@5;<br>ITRAQ4plex(K)@8                                            | cleaved I-A@N-term                     | 0.0409  | 1178.6982 | 590.3564 | 1178.6573 | 590.3359 | 2 | 42.13 |
|          | 15.88 | 20.4 | DTGWDWEK                 | ITRAQ4plex@N-term;<br>ITRAQ4plex(K)@8                                                               | cleaved M-D@N-term                     | -0.0043 | 1323.6296 | 662.8221 | 1323.6339 | 662.8242 | 2 | 31.53 |
|          | 15.88 | 20.4 | EGLVENPTR                | Delta:H(2)C(2)@N-term                                                                               |                                        | 0.0007  | 1039.5305 | 520.7725 | 1039.5298 | 520.7722 | 2 | 28.32 |
|          | 15.88 | 20.4 | GVHPNMGIGQAVAT<br>K      | ITRAQ4plex@N-term;<br>ITRAQ4plex(K)@16                                                              |                                        | -0.0140 | 1880.9994 | 628.0071 | 1881.0134 | 628.0118 | 3 | 29.43 |
|          | 15.88 | 20.4 | INPNGGSAIGHPFGAT<br>GIR  | ITRAQ4plex@N-term;<br>Deamidated(N)@4                                                               |                                        | 0.0137  | 2093.1277 | 698.7165 | 2093.1140 | 698.7119 | 3 | 46.68 |
|          | 15.88 | 20.4 | IVAEDILAK                | ITRAQ4plex@N-term;<br>ITRAQ4plex(K)@9                                                               |                                        | -0.0093 | 1258.7646 | 630.3896 | 1258.7740 | 630.3943 | 2 | 31.88 |
|          | 15.88 | 20.4 | KINPNGGSAIGHPFG<br>ATGIR | ITRAQ4plex@N-term;<br>ITRAQ4plex(K)@1;<br>Deamidated(N)@5                                           | missed K-I@1                           | -0.0621 | 2365.2490 | 592.3195 | 2365.3110 | 592.3350 | 4 | 36.32 |
|          | 15.88 | 20.4 | KLLPDNLPEGVLR            | ITRAQ4plex@N-term;<br>ITRAQ4plex(K)@1                                                               | missed K-L@1                           | -0.9843 | 1879.1133 | 627.3784 | 1880.0975 | 627.7064 | 3 | 32.81 |
|          | 15.88 | 20.4 | LAFESFK                  | ITRAQ4plex@N-term;<br>ITRAQ4plex(K)@7                                                               |                                        | 0.0115  | 1128.6538 | 565.3342 | 1128.6423 | 565.3284 | 2 | 32.74 |
|          | 15.88 | 20.4 | LIANAIMDLK               | ITRAQ4plex@N-term;<br>ITRAQ4plex(K)@10                                                              |                                        | -0.0033 | 1388.8273 | 695.4209 | 1388.8305 | 695.4225 | 2 | 45.76 |
|          | 15.88 | 20.4 | LLPDNLPEGVLR             | ITRAQ4plex@N-term                                                                                   |                                        | -0.0015 | 1607.8990 | 804.9568 | 1607.9005 | 804.9575 | 2 | 33.43 |
|          | 15.88 | 20.4 | LTKPLAICTPR              | ITRAQ4plex@N-term;<br>ITRAQ4plex(K)@3;<br>Methylthio(C)@8                                           |                                        | -0.0053 | 1545.8926 | 516.3048 | 1545.8979 | 516.3066 | 3 | 40.88 |
|          | 15.88 | 20.4 | MDTGWDWEK                | ITRAQ4plex@N-term;<br>ITRAQ4plex(K)@9                                                               |                                        | 0.0414  | 1454.7158 | 728.3652 | 1454.6744 | 728.3445 | 2 | 37.96 |
|          | 15.88 | 20.4 | RTPFAQIAK                | ITRAQ4plex@N-term;<br>ITRAQ4plex(K)@9                                                               | missed R-T@1                           | -0.0053 | 1318.7911 | 440.6043 | 1318.7965 | 440.6061 | 3 | 31.78 |
|          | 15.88 | 20.4 | SDGAAGVIVTTVEK           | ITRAQ4plex@N-term;<br>ITRAQ4plex(K)@14                                                              |                                        | 0.0209  | 1633.9340 | 817.9742 | 1633.9130 | 817.9638 | 2 | 51.22 |



|          |       |      |                           |                                                                                                     |                                                    |         |           |          |           |          |   |       |
|----------|-------|------|---------------------------|-----------------------------------------------------------------------------------------------------|----------------------------------------------------|---------|-----------|----------|-----------|----------|---|-------|
|          | 23.7  | 30.6 | SHGPTVSIIFNASPR           | CarbamyI@N-term;<br>Deamidated(N)@10                                                                |                                                    | -0.9881 | 1511.7440 | 756.8793 | 1512.7321 | 757.3733 | 2 | 41.78 |
|          | 15.88 | 20.4 | VIANLVGMR                 | ITRAQ4plex@N-term                                                                                   |                                                    | 0.0123  | 1115.6730 | 558.8438 | 1115.6607 | 558.8376 | 2 | 32.05 |
| LIC12801 |       |      |                           |                                                                                                     |                                                    |         |           |          |           |          |   |       |
|          | 4     | 6.3  | AGLTYK                    | ITRAQ4plex@N-term;<br>ITRAQ4plex(K)@6                                                               | cleaved A-A@N-term                                 | 0.0015  | 939.5649  | 470.7897 | 939.5633  | 470.7889 | 2 | 40.08 |
|          | 4     | 6.3  | LLETFLIEK                 | ITRAQ4plex@N-term;<br>ITRAQ4plex(K)@9                                                               |                                                    | -0.0069 | 1392.8403 | 697.4274 | 1392.8472 | 697.4309 | 2 | 49.19 |
|          | 4     | 6.3  | LPNVQSVFTR                | ITRAQ4plex@N-term                                                                                   |                                                    | 0.0103  | 1303.7473 | 652.8809 | 1303.7370 | 652.8758 | 2 | 44.59 |
| LIC12805 |       |      |                           |                                                                                                     |                                                    |         |           |          |           |          |   |       |
|          | 1.52  | 3.0  | AIDPSMNPDPNEVM<br>AFGETVK | ITRAQ4plex@N-term;<br>Oxidation(D)@3;<br>ITRAQ4plex(K)@23                                           |                                                    | 0.1056  | 2824.4558 | 942.4926 | 2824.3503 | 942.4574 | 3 | 41.71 |
|          | 1.52  | 3.0  | EIIEEKPTLK                | ITRAQ4plex@N-term;<br>ITRAQ4plex(K)@6;<br>ITRAQ4plex(K)@10                                          |                                                    | -0.0016 | 1630.9856 | 544.6691 | 1630.9871 | 544.6696 | 3 | 30.33 |
|          | 1.52  | 3.0  | IIEEK                     | ITRAQ4plex@N-term;<br>ITRAQ4plex(K)@5                                                               | cleaved E-I@N-term; cleaved K-P@C-term             | -0.0283 | 918.5347  | 460.2746 | 918.5630  | 460.2888 | 2 | 23.70 |
|          | 1.52  | 3.0  | ISAEFK                    | ITRAQ4plex@N-term;<br>ITRAQ4plex(K)@6                                                               |                                                    | 0.0078  | 981.5817  | 491.7981 | 981.5739  | 491.7942 | 2 | 32.72 |
|          | 1.52  | 3.0  | RNLASPESSQSILLT<br>R      | ITRAQ4plex@N-term;<br>Deamidated(R)@1;<br>Oxidation(P)@6;<br>Deamidated(Q)@10                       | missed R-N@1                                       | 0.0301  | 2062.0964 | 688.3727 | 2062.0664 | 688.3627 | 3 | 40.41 |
|          | 1.52  | 3.0  | RSGALEETSVMKFNQ<br>AAK    | ITRAQ4plex@N-term;<br>ITRAQ4plex(K)@11;<br>ITRAQ4plex(K)@18                                         | cleaved I-R@N-term; missed R-S@1;<br>missed K-N@11 | -0.0305 | 2381.2722 | 794.7647 | 2381.3028 | 794.7749 | 3 | 46.25 |
| LIC12812 |       |      |                           |                                                                                                     |                                                    |         |           |          |           |          |   |       |
|          | 2     | 4.9  | DINGRVGINR                | ITRAQ4plex@N-term                                                                                   | cleaved L-D@N-term; missed R-V@5                   | -0.0444 | 1369.7468 | 685.8807 | 1369.7912 | 685.9029 | 2 | 36.29 |
|          | 2     | 4.9  | HPGP                      | ITRAQ4plex@N-term                                                                                   | cleaved A-H@N-term; cleaved P-F@C-term             | 0.0259  | 550.3245  | 551.3317 | 550.2985  | 551.3058 | 1 | 46.25 |
|          | 2     | 4.9  | IKPEGEIVPIELGSSA<br>VK    | ITRAQ4plex@N-term;<br>ITRAQ4plex(K)@2;<br>ITRAQ4plex(K)@19                                          |                                                    | -0.0163 | 2412.3679 | 805.1299 | 2412.3841 | 805.1353 | 3 | 33.02 |
|          | 2     | 5.7  | IQNVPAHPGPFDPFF<br>DQFFGR | ITRAQ4plex@N-term                                                                                   |                                                    | -0.0016 | 2633.2920 | 878.7713 | 2633.2937 | 878.7719 | 3 | 56.33 |
|          | 2     | 5.7  | LALLK                     | ITRAQ4plex@N-term;<br>ITRAQ4plex(K)@5                                                               | cleaved D-L@N-term                                 | 0.0125  | 844.6115  | 423.3130 | 844.5990  | 423.3068 | 2 | 42.63 |
|          | 2     | 4.9  | QGNISRISQLKERP            | ITRAQ4plex@N-term;<br>ITRAQ4plex(K)@12;<br>Deamidated(R)@14                                         | cleaved P-N@C-term; missed R-I@6                   | -0.0903 | 2027.0828 | 676.7015 | 2027.1731 | 676.7316 | 3 | 39.36 |
|          | 2     | 4.9  | QGNISRISQLKERPN           | ITRAQ4plex@N-term;<br>Deamidated(Q)@1;<br>Deamidated(N)@3;<br>ITRAQ4plex(K)@12;<br>Deamidated(R)@14 | missed R-I@6                                       | -0.0080 | 2143.1760 | 715.3993 | 2143.1841 | 715.4020 | 3 | 46.71 |
| LIC12821 |       |      |                           |                                                                                                     |                                                    |         |           |          |           |          |   |       |
|          | 5.41  | 16.4 | DLIDLEYSK                 | ITRAQ4plex@N-term;<br>ITRAQ4plex(K)@9                                                               |                                                    | -0.0089 | 1382.7448 | 692.3796 | 1382.7537 | 692.3841 | 2 | 31.50 |
|          | 5.41  | 16.4 | DSLSVEK                   | ITRAQ4plex@N-term;<br>ITRAQ4plex(K)@7                                                               |                                                    | 0.0111  | 1064.6068 | 533.3107 | 1064.5957 | 533.3051 | 2 | 26.88 |
|          | 2.69  | 5.5  | FFINGSLK                  | ITRAQ4plex@N-term;<br>Deamidated(N)@4;<br>ITRAQ4plex(K)@8                                           |                                                    | 0.0009  | 1213.6959 | 607.8552 | 1213.6950 | 607.8548 | 2 | 44.67 |
|          | 2.69  | 5.5  | ILGDIR                    | ITRAQ4plex@N-term                                                                                   |                                                    | 0.0066  | 829.5210  | 415.7678 | 829.5143  | 415.7644 | 2 | 40.97 |
|          | 5.41  | 16.4 | SLQAEQLYIGVTGK            | ITRAQ4plex@N-term;<br>ITRAQ4plex(K)@14                                                              |                                                    | 0.0071  | 1794.0201 | 599.0140 | 1794.0131 | 599.0116 | 3 | 48.17 |
|          | 5.41  | 16.4 | TPELIQNGVILEGR            | ITRAQ4plex@N-term;<br>Deamidated(N)@8                                                               |                                                    | 0.0058  | 1796.0223 | 899.0184 | 1796.0165 | 899.0156 | 2 | 54.26 |
|          | 5.41  | 16.4 | VMLLPTSK                  | ITRAQ4plex@N-term;<br>ITRAQ4plex(K)@8                                                               |                                                    | -0.0096 | 1175.7096 | 588.8621 | 1175.7191 | 588.8669 | 2 | 30.37 |
| LIC12822 |       |      |                           |                                                                                                     |                                                    |         |           |          |           |          |   |       |
|          | 2.01  | 3.9  | ISHEQILELQK               | No ITRAQ4plex@N-term;<br>Deamidated(Q)@5;<br>ITRAQ4plex(K)@11                                       | cleaved A-I@N-term                                 | -0.0305 | 1481.7906 | 494.9375 | 1481.8211 | 494.9477 | 3 | 28.35 |
|          | 2.01  | 3.9  | LPVLNETHVRFDFSHT<br>NEK   | ITRAQ4plex@N-term;<br>Oxidation(P)@2;<br>Deamidated(N)@5;<br>ITRAQ4plex(K)@19                       | cleaved Y-L@N-term; missed R-F@10                  | -0.0005 | 2587.3269 | 863.4496 | 2587.3274 | 863.4498 | 3 | 34.70 |
|          | 2.01  | 3.9  | NEFLNK                    | ITRAQ4plex@N-term;<br>Deamidated(N)@5;<br>ITRAQ4plex(K)@6                                           | cleaved F-N@N-term                                 | 0.0497  | 1052.6243 | 527.3194 | 1052.5746 | 527.2946 | 2 | 43.60 |
|          | 2.01  | 3.9  | QEFREQLSR                 | ITRAQ4plex@N-term;<br>Deamidated(R)@9                                                               | missed R-E@4                                       | -0.0973 | 1336.5884 | 669.3015 | 1336.6857 | 669.3501 | 2 | 32.96 |
|          | 2.01  | 3.9  | YKENPNEAGR                | ITRAQ4plex@N-term;<br>ITRAQ4plex(K)@2                                                               |                                                    | -0.0156 | 1464.7408 | 489.2542 | 1464.7565 | 489.2594 | 3 | 26.17 |

|          |       |      |                               |                                                                                |                                  |         |           |           |           |           |   |       |
|----------|-------|------|-------------------------------|--------------------------------------------------------------------------------|----------------------------------|---------|-----------|-----------|-----------|-----------|---|-------|
|          | 2.01  | 3.9  | YQKMIHQLEK                    | ITRAQ4plex@N-term;<br>ITRAQ4plex(K)@3;<br>Deamidated(Q)@7;<br>ITRAQ4plex(K)@10 | missed K-M@3                     | 0.0191  | 1750.0002 | 584.3407  | 1749.9813 | 584.3344  | 3 | 32.07 |
| LIC12829 |       |      |                               |                                                                                |                                  |         |           |           |           |           |   |       |
|          | 11.49 | 14.5 | AEVAALK                       | ITRAQ4plex@N-term;<br>ITRAQ4plex(K)@7                                          | cleaved M-A@N-term               | -0.0010 | 1030.6620 | 516.3383  | 1030.6630 | 516.3388  | 2 | 40.12 |
|          | 11.49 | 14.5 | AIDISK                        | ITRAQ4plex@N-term;<br>ITRAQ4plex(K)@6                                          |                                  | -0.0126 | 933.5613  | 467.7879  | 933.5739  | 467.7942  | 2 | 37.33 |
|          | 16.98 | 26.6 | ALGIPVNMFTVMFAM<br>GR         | ITRAQ4plex@N-term                                                              |                                  | -0.0037 | 1998.0338 | 1000.0240 | 1998.0375 | 1000.0260 | 2 | 49.26 |
|          | 16.98 | 26.6 | ELEETALHDPYFVER               | ITRAQ4plex@N-term                                                              |                                  | -0.0024 | 1990.9733 | 664.6650  | 1990.9758 | 664.6659  | 3 | 31.96 |
|          | 16.98 | 26.6 | FPTIAAFAYK                    | ITRAQ4plex@N-term;<br>ITRAQ4plex(K)@10                                         |                                  | 0.0029  | 1415.8086 | 708.9116  | 1415.8057 | 708.9101  | 2 | 34.32 |
|          | 16.98 | 26.6 | GVQDSLDDIAK                   | ITRAQ4plex@N-term;<br>ITRAQ4plex(K)@11                                         | cleaved L-G@N-term               | 0.0066  | 1445.8400 | 723.9272  | 1445.8333 | 723.9239  | 2 | 32.65 |
|          | 11.49 | 14.5 | GWIAQWK                       | ITRAQ4plex@N-term;<br>ITRAQ4plex(K)@7                                          | cleaved P-G@N-term               | -0.0136 | 1175.6559 | 588.8352  | 1175.6695 | 588.8420  | 2 | 47.20 |
|          | 16.98 | 26.6 | HGGANQEVLEMLQEI<br>QASGLPVK   | ITRAQ4plex@N-term;<br>ITRAQ4plex(K)@23                                         |                                  | -0.0073 | 2735.4446 | 912.8221  | 2735.4520 | 912.8246  | 3 | 42.30 |
|          | 16.98 | 26.6 | HISMIR                        | ITRAQ4plex@N-term                                                              |                                  | 0.1940  | 899.7073  | 450.8609  | 899.5133  | 450.7639  | 2 | 53.41 |
|          | 16.98 | 26.6 | IDGKEYELPIVIGTEK              | ITRAQ4plex@N-term;<br>ITRAQ4plex(K)@4;<br>ITRAQ4plex(K)@16                     |                                  | 0.0128  | 2235.2856 | 746.1025  | 2235.2728 | 746.0982  | 3 | 34.12 |
|          | 16.98 | 26.6 | IPSDSELKK                     | ITRAQ4plex@N-term;<br>ITRAQ4plex(K)@8;<br>ITRAQ4plex(K)@9                      | missed K-K@8                     | -0.0639 | 1447.7972 | 483.6064  | 1447.8612 | 483.6277  | 3 | 29.61 |
|          | 16.98 | 26.6 | ISMIR                         | ITRAQ4plex@N-term                                                              | cleaved H-I@N-term               | -0.0061 | 762.4484  | 763.4556  | 762.4544  | 763.4617  | 1 | 57.23 |
|          | 11.49 | 14.5 | KLYPNVDFYSGIYR                | ITRAQ4plex@N-term;<br>ITRAQ4plex(K)@1;<br>Deamidated(N)@5                      | missed K-L@1                     | 0.0170  | 2136.1670 | 713.0629  | 2136.1499 | 713.0572  | 3 | 53.08 |
|          | 16.98 | 26.6 | LGVQDSLDDIAK                  | ITRAQ4plex@N-term;<br>ITRAQ4plex(K)@12                                         |                                  | -0.0107 | 1558.9067 | 780.4606  | 1558.9174 | 780.4660  | 2 | 33.59 |
|          | 16.98 | 26.6 | LPGWIAQWK                     | ITRAQ4plex@N-term;<br>ITRAQ4plex(K)@9                                          |                                  | 0.0052  | 1385.8115 | 693.9130  | 1385.8063 | 693.9104  | 2 | 35.72 |
|          | 11.49 | 14.5 | LSGFGHR                       | ITRAQ4plex@N-term                                                              |                                  | -0.0010 | 916.4991  | 459.2568  | 916.5001  | 459.2573  | 2 | 38.68 |
|          | 16.98 | 26.6 | LVGSSLANLYGAISAGI<br>CALWGPGR | ITRAQ4plex@N-term;<br>Oxidation(Y)@10;<br>Methylthio(C)@18                     |                                  | -0.0178 | 2594.3293 | 865.7837  | 2594.3471 | 865.7896  | 3 | 41.72 |
|          | 16.98 | 26.6 | LYPNVDFYSGIYR                 | ITRAQ4plex@N-term                                                              |                                  | -0.0338 | 1862.9351 | 932.4748  | 1862.9689 | 932.4917  | 2 | 50.75 |
|          | 16.98 | 26.6 | QIYTGSTETSYK                  | Gln->pyro-Glu@N-term;<br>ITRAQ4plex(K)@12                                      |                                  | 0.0062  | 1503.7278 | 752.8712  | 1503.7215 | 752.8680  | 2 | 38.33 |
|          | 11.49 | 14.5 | SVPSEDYK                      | ITRAQ4plex@N-term;<br>ITRAQ4plex(K)@8                                          | cleaved F-S@N-term               | 0.0091  | 1211.6368 | 606.8257  | 1211.6278 | 606.8212  | 2 | 34.71 |
| LIC12909 |       |      |                               |                                                                                |                                  |         |           |           |           |           |   |       |
|          | 2     | 2.7  | VSEDK                         | ITRAQ4plex@N-term;<br>ITRAQ4plex(K)@5                                          | cleaved V-V@N-term               | 0.0465  | 864.5261  | 433.2703  | 864.4796  | 433.2471  | 2 | 39.70 |
|          | 2     | 2.7  | YGGTSGVTPER                   | ITRAQ4plex@N-term                                                              |                                  | 0.0030  | 1266.6356 | 634.3251  | 1266.6326 | 634.3236  | 2 | 34.05 |
| LIC12921 |       |      |                               |                                                                                |                                  |         |           |           |           |           |   |       |
|          | 37.48 | 32.2 | AVSFSEEIADGNLIAQ<br>SSHDK     | ITRAQ4plex@N-term;<br>ITRAQ4plex(S)@18;<br>ITRAQ4plex(K)@21                    |                                  | -0.0216 | 2649.3396 | 663.3422  | 2649.3611 | 663.3476  | 4 | 37.47 |
|          | 37.48 | 32.2 | DEIGTLSSMNK                   | ITRAQ4plex@N-term;<br>ITRAQ4plex(K)@12                                         |                                  | 0.0106  | 1594.8586 | 798.4366  | 1594.8480 | 798.4313  | 2 | 34.07 |
|          | 37.48 | 32.2 | DSNR                          | ITRAQ4plex@N-term                                                              | cleaved F-D@N-term               | 0.0800  | 634.3957  | 635.4030  | 634.3156  | 635.3229  | 1 | 54.64 |
|          | 37.48 | 32.2 | DYLDTGMGIIR                   | ITRAQ4plex@N-term                                                              |                                  | -0.0360 | 1396.6782 | 699.3464  | 1396.7142 | 699.3644  | 2 | 32.90 |
|          | 37.48 | 32.2 | EEAVLEQKR                     | Glu->pyro-Glu@N-term;<br>ITRAQ4plex(K)@8                                       | cleaved I-E@N-term; missed K-R@8 | 0.0002  | 1226.6743 | 409.8987  | 1226.6741 | 409.8986  | 3 | 26.85 |
|          | 37.48 | 32.2 | EEIVLEAAK                     | ITRAQ4plex@N-term;<br>ITRAQ4plex(K)@9                                          |                                  | 0.0068  | 1288.7550 | 645.3848  | 1288.7482 | 645.3814  | 2 | 29.74 |
|          | 37.48 | 32.2 | ELEYLSK                       | ITRAQ4plex@N-term;<br>ITRAQ4plex(K)@8                                          |                                  | -0.0043 | 1331.7174 | 666.8660  | 1331.7217 | 666.8681  | 2 | 32.55 |
|          | 37.48 | 32.2 | EMQDLVELAALSK                 | ITRAQ4plex@N-term;<br>ITRAQ4plex(K)@13                                         |                                  | 0.0080  | 1733.9557 | 867.9851  | 1733.9477 | 867.9811  | 2 | 35.48 |
|          | 37.48 | 32.2 | FPLFSAPPR                     | ITRAQ4plex@N-term                                                              |                                  | 0.0108  | 1287.7570 | 644.8857  | 1287.7461 | 644.8803  | 2 | 35.27 |
|          | 37.48 | 32.2 | FTTDSGDYTHYFFPH<br>IGK        | ITRAQ4plex@N-term;<br>ITRAQ4plex(K)@19                                         |                                  | 0.0016  | 2583.2332 | 646.8156  | 2583.2314 | 646.8151  | 4 | 39.41 |
|          | 37.48 | 32.2 | GFAVVAEEIGK                   | ITRAQ4plex@N-term;<br>ITRAQ4plex(K)@11                                         |                                  | 0.0027  | 1406.8041 | 704.4093  | 1406.8013 | 704.4079  | 2 | 50.17 |
|          | 37.48 | 32.2 | GIYAVNGFDSNR                  | ITRAQ4plex@N-term;<br>Deamidated(N)@6                                          |                                  | -0.0252 | 1456.6816 | 729.3481  | 1456.7068 | 729.3607  | 2 | 29.82 |
|          | 37.48 | 32.2 | GQAR                          | ITRAQ4plex@N-term                                                              | cleaved H-G@N-term               | -0.0063 | 574.3246  | 575.3318  | 574.3309  | 575.3382  | 1 | 37.85 |
|          | 37.48 | 32.2 | GQTKEIVLEAAK                  | ITRAQ4plex@N-term;<br>ITRAQ4plex(K)@4;<br>ITRAQ4plex(K)@13                     |                                  | 0.0064  | 1847.0793 | 616.7004  | 1847.0729 | 616.6983  | 3 | 32.55 |

|          |      |                               |                                                                                  |                                  |         |           |          |           |          |   |       |
|----------|------|-------------------------------|----------------------------------------------------------------------------------|----------------------------------|---------|-----------|----------|-----------|----------|---|-------|
| 37.48    | 32.2 | GSLVNSTNTAVLNGN<br>TK         | ITRAQ4plex@N-term;<br>Deamidated(N)@5;<br>ITRAQ4plex(K)@17                       | cleaved I-G@N-term               | 0.0674  | 1978.1250 | 660.3823 | 1978.0575 | 660.3598 | 3 | 42.68 |
| 37.48    | 32.2 | ILSILFK                       | ITRAQ4plex@N-term;<br>ITRAQ4plex(K)@7                                            | cleaved A-I@N-term               | -0.0204 | 1120.7261 | 561.3703 | 1120.7464 | 561.3805 | 2 | 52.36 |
| 37.48    | 32.2 | ISDAK                         | ITRAQ4plex@N-term;<br>ITRAQ4plex(K)@5                                            |                                  | -0.0110 | 820.4789  | 411.2467 | 820.4898  | 411.2522 | 2 | 30.36 |
| 37.48    | 32.2 | ITEILSITEISER                 | ITRAQ4plex@N-term                                                                |                                  | -0.0668 | 1759.9385 | 880.9765 | 1760.0053 | 881.0099 | 2 | 44.56 |
| 37.48    | 32.2 | KDEIGTLSSMNK                  | ITRAQ4plex@N-term;<br>ITRAQ4plex(K)@1;<br>ITRAQ4plex(K)@13                       |                                  | -0.0192 | 1867.0259 | 623.3492 | 1867.0450 | 623.3556 | 3 | 38.14 |
| 37.48    | 32.2 | KLEQEVVNSSEITAER              | ITRAQ4plex@N-term;<br>ITRAQ4plex(K)@1                                            | missed K-L@1                     | 0.0097  | 2119.1462 | 707.3893 | 2119.1364 | 707.3861 | 3 | 31.30 |
| 37.48    | 32.2 | KPFQDLGYLTLISPK               | ITRAQ4plex@N-term;<br>ITRAQ4plex(K)@1;<br>ITRAQ4plex(K)@15                       |                                  | -0.0173 | 2151.2495 | 718.0905 | 2151.2669 | 718.0962 | 3 | 36.68 |
| 37.48    | 32.2 | LAYEPNSLDGNDLEF<br>QNTLGHSTGR | ITRAQ4plex@N-term;<br>Deamidated(N)@11;<br>ITRAQ4plex(T)@24                      |                                  | -0.0232 | 3151.4707 | 788.8749 | 3151.4938 | 788.8807 | 4 | 33.04 |
| 37.48    | 32.2 | LKEQIVNINR                    | ITRAQ4plex@N-term;<br>ITRAQ4plex(K)@2                                            |                                  | -0.0090 | 1513.9094 | 505.6437 | 1513.9184 | 505.6467 | 3 | 30.75 |
| 37.48    | 32.2 | LREQVEEFDR                    | ITRAQ4plex@N-term                                                                | missed R-E@2                     | 0.0063  | 1463.7554 | 488.9257 | 1463.7490 | 488.9236 | 3 | 30.32 |
| 37.48    | 32.2 | NQIIAALR                      | No ITRAQ4plex@N-term                                                             |                                  | 0.0050  | 897.5446  | 449.7796 | 897.5396  | 449.7771 | 2 | 29.93 |
| 37.48    | 32.2 | PFHIGK                        | ITRAQ4plex@N-term;<br>ITRAQ4plex(K)@6                                            | cleaved F-P@N-term               | -0.0521 | 985.5432  | 493.7789 | 985.5953  | 493.8049 | 2 | 35.64 |
| 37.48    | 32.2 | RATDEITK                      | ITRAQ4plex@N-term;<br>ITRAQ4plex(K)@8                                            | missed R-A@1                     | -0.0073 | 1220.6896 | 611.3521 | 1220.6968 | 611.3557 | 2 | 25.22 |
| 37.48    | 32.2 | REMQDLVELAALSK                | ITRAQ4plex@N-term;<br>ITRAQ4plex(K)@14                                           | cleaved N-R@N-term; missed R-E@1 | -0.0060 | 1890.0428 | 631.0215 | 1890.0488 | 631.0235 | 3 | 35.58 |
| 37.48    | 32.2 | RTNLLALNAIEAAR                | ITRAQ4plex@N-term;<br>Deamidated(N)@3;<br>Oxidation(N)@8                         | cleaved E-R@N-term; missed R-T@1 | 0.0824  | 1757.0742 | 586.6987 | 1756.9917 | 586.6712 | 3 | 38.16 |
| 37.48    | 32.2 | VAEAFNILK                     | ITRAQ4plex@N-term;<br>ITRAQ4plex(K)@9                                            |                                  | -0.0043 | 1291.7700 | 646.8923 | 1291.7744 | 646.8945 | 2 | 33.23 |
| 37.48    | 32.2 | VLREIGGSANTLRDTS<br>EK        | ITRAQ4plex@N-term;<br>Deamidated(N)@10;<br>Deamidated(R)@13;<br>ITRAQ4plex(K)@18 | missed R-E@3; missed R-D@13      | 0.0991  | 2235.2942 | 746.1053 | 2235.1950 | 746.0723 | 3 | 36.27 |
| 37.48    | 32.2 | VNINREMQDLVELAAL<br>SK        | ITRAQ4plex@N-term;<br>Deamidated(Q)@8;<br>ITRAQ4plex(K)@18                       | cleaved I-V@N-term; missed R-E@5 | 0.0578  | 2331.3291 | 778.1169 | 2331.2712 | 778.0977 | 3 | 40.66 |
| 37.48    | 32.2 | WTYEVK                        | ITRAQ4plex@N-term;<br>ITRAQ4plex(K)@6                                            |                                  | 0.0026  | 1112.6136 | 557.3141 | 1112.6110 | 557.3128 | 2 | 30.14 |
| 21.16    | 18.1 | AVLSMK                        | ITRAQ4plex@N-term;<br>ITRAQ4plex(K)@6                                            |                                  | 0.0096  | 935.5814  | 468.7979 | 935.5718  | 468.7932 | 2 | 38.36 |
| 21.16    | 18.1 | AVLSMKEIDGNVIR                | ITRAQ4plex@N-term;<br>ITRAQ4plex(K)@6;<br>Deamidated(N)@11                       |                                  | -0.1115 | 1832.9159 | 917.4652 | 1833.0274 | 917.5210 | 2 | 54.94 |
| 21.16    | 18.1 | ENLLKVLREIGGSANT<br>LR        | No ITRAQ4plex@N-term;<br>Oxidation(N)@2;<br>ITRAQ4plex(K)@5;<br>Deamidated(N)@15 | missed K-V@5; missed R-E@8       | 0.0103  | 2143.2185 | 715.4135 | 2143.2083 | 715.4100 | 3 | 55.83 |
| 21.16    | 18.1 | FIPYLHR                       | ITRAQ4plex@N-term                                                                |                                  | -0.0116 | 1088.6138 | 545.3141 | 1088.6253 | 545.3199 | 2 | 44.41 |
| 21.16    | 18.1 | IPYLHR                        | ITRAQ4plex@N-term                                                                | cleaved F-I@N-term               | -0.0012 | 941.5557  | 471.7851 | 941.5569  | 471.7857 | 2 | 43.01 |
| 21.16    | 18.1 | LKVLRL                        | ITRAQ4plex@N-term;<br>ITRAQ4plex(K)@2                                            | cleaved L-L@N-term; missed K-V@2 | 0.0121  | 915.6594  | 458.8370 | 915.6473  | 458.8309 | 2 | 54.64 |
| 21.16    | 18.1 | NVLTSVK                       | ITRAQ4plex@N-term;<br>ITRAQ4plex(K)@7                                            |                                  | 0.0019  | 1047.6552 | 524.8348 | 1047.6532 | 524.8339 | 2 | 38.41 |
| 21.16    | 18.1 | TEILSITEISER                  | ITRAQ4plex@N-term;<br>Dehydrated(T)@1                                            | cleaved I-T@N-term               | -0.9957 | 1627.9150 | 814.9648 | 1628.9107 | 815.4626 | 2 | 54.92 |
| 21.16    | 18.1 | VNDHYFGAR                     | CarbamyI@N-term                                                                  |                                  | 0.0088  | 1120.5138 | 561.2642 | 1120.5050 | 561.2598 | 2 | 39.01 |
| LIC12925 |      |                               |                                                                                  |                                  |         |           |          |           |          |   |       |
| 6.89     | 9.2  | DPNSGELNYR                    | ITRAQ4plex@N-term                                                                |                                  | 0.0794  | 1307.7021 | 436.9080 | 1307.6228 | 436.8815 | 3 | 28.70 |
| 6.89     | 9.2  | ELFTAMQVIGK                   | ITRAQ4plex@N-term;<br>ITRAQ4plex(K)@11                                           |                                  | 0.0784  | 1523.9409 | 762.9777 | 1523.8625 | 762.9385 | 2 | 47.21 |
| 6.89     | 9.2  | IEDILK                        | ITRAQ4plex@N-term;<br>ITRAQ4plex(K)@6                                            | cleaved L-I@N-term               | 0.0108  | 1017.6422 | 509.8284 | 1017.6314 | 509.8230 | 2 | 34.58 |
| 6.89     | 9.2  | INLFDGFP GK                   | ITRAQ4plex@N-term;<br>Deamidated(N)@2;<br>ITRAQ4plex(K)@10                       | cleaved M-I@N-term               | -0.0084 | 1395.7559 | 698.8852 | 1395.7642 | 698.8894 | 2 | 41.43 |
| 6.89     | 9.2  | LPGWLAHWR                     | ITRAQ4plex@N-term                                                                |                                  | 0.0046  | 1278.7152 | 427.2457 | 1278.7107 | 427.2442 | 3 | 35.76 |
| 6.89     | 9.2  | LPTEQQLK                      | ITRAQ4plex@N-term;<br>ITRAQ4plex(K)@8                                            |                                  | -0.0094 | 1243.7286 | 622.8716 | 1243.7380 | 622.8763 | 2 | 28.33 |
| 4.54     | 5.9  | QIYSGEMGR                     | Gln->pyro-Glu@N-term;<br>ITRAQ4plex(Y)@3                                         |                                  | -0.0157 | 1166.5355 | 584.2750 | 1166.5512 | 584.2829 | 2 | 37.14 |
| 6.89     | 9.2  | RDPNSGELNYR                   | ITRAQ4plex@N-term                                                                | missed R-D@1                     | 0.0225  | 1463.7463 | 488.9227 | 1463.7239 | 488.9152 | 3 | 27.46 |

|          |      |      |                            |                                                                                                  |                                                 |         |           |           |           |           |   |       |
|----------|------|------|----------------------------|--------------------------------------------------------------------------------------------------|-------------------------------------------------|---------|-----------|-----------|-----------|-----------|---|-------|
|          | 6.89 | 9.2  | SEFIEIK                    | ITRAQ4plex@N-term;<br>ITRAQ4plex(K)@7                                                            | cleaved M-S@N-term                              | -0.0184 | 1152.6450 | 577.3298  | 1152.6634 | 577.3390  | 2 | 38.07 |
|          | 6.89 | 9.2  | SVPEYFEK                   | ITRAQ4plex@N-term;<br>ITRAQ4plex(K)@8                                                            |                                                 | 0.0150  | 1285.6948 | 643.8547  | 1285.6798 | 643.8472  | 2 | 29.72 |
|          | 4.54 | 5.9  | SYQFPLISGTDGKK             | ITRAQ4plex@N-term;<br>ITRAQ4plex(K)@13;<br>ITRAQ4plex(K)@14                                      | missed K-K@13                                   | 0.0367  | 1972.1361 | 658.3860  | 1972.0995 | 658.3738  | 3 | 54.35 |
|          | 6.89 | 9.2  | TGLISYDPGFFNTAYA<br>VSR    | ITRAQ4plex@N-term                                                                                |                                                 | 0.0044  | 2222.1172 | 1112.0660 | 2222.1130 | 1112.0638 | 2 | 37.55 |
|          | 6.89 | 9.2  | VSGNYSK                    | ITRAQ4plex@N-term;<br>ITRAQ4plex(K)@7                                                            |                                                 | 0.0057  | 1041.5756 | 521.7950  | 1041.5698 | 521.7922  | 2 | 24.11 |
| LIC12931 |      |      |                            |                                                                                                  |                                                 |         |           |           |           |           |   |       |
|          | 4    | 10.3 | ARKNGLSLEDNLK              | ITRAQ4plex@N-term;<br>Oxidation(R)@2;<br>ITRAQ4plex(K)@3;<br>Oxidation(N)@4;<br>ITRAQ4plex(K)@14 | missed R-K@2; missed K-N@3                      | -0.0235 | 2034.1564 | 679.0594  | 2034.1799 | 679.0672  | 3 | 36.89 |
|          | 4    | 10.3 | GVIALQSGDNRRLME<br>RMNPFID | No ITRAQ4plex@N-term;<br>Deamidated(N)@19                                                        | missed R-R@11; missed R-I@12; missed R-<br>M@17 | 0.0951  | 2645.4370 | 882.8196  | 2645.3418 | 882.7879  | 3 | 34.08 |
|          | 4    | 10.3 | KLPLGELFLDFAER             | ITRAQ4plex@N-term;<br>ITRAQ4plex(K)@1                                                            | missed K-L@1                                    | -0.0118 | 1935.0956 | 646.0391  | 1935.1073 | 646.0430  | 3 | 45.25 |
|          | 4    | 10.3 | KNGLSLEDNLK                | ITRAQ4plex@N-term;<br>ITRAQ4plex(K)@1;<br>Deamidated(N)@2;<br>ITRAQ4plex(K)@12                   | missed K-N@1                                    | -0.0201 | 1776.0157 | 593.0125  | 1776.0358 | 593.0192  | 3 | 36.95 |
|          | 4    | 10.3 | RQAIIR                     | ITRAQ4plex@N-term                                                                                | missed R-Q@1                                    | 0.1146  | 899.6933  | 450.8539  | 899.5787  | 450.7966  | 2 | 51.39 |
|          | 4    | 10.3 | SGDNR                      | No ITRAQ4plex@N-term                                                                             | cleaved Q-S@N-term                              | 0.0849  | 547.3199  | 548.3272  | 547.2350  | 548.2423  | 1 | 40.34 |
| LIC12936 |      |      |                            |                                                                                                  |                                                 |         |           |           |           |           |   |       |
|          | 4    | 11.0 | EVENGGPYQENPKE             | ITRAQ4plex@N-term;<br>Deamidated(N)@4;<br>ITRAQ4plex(K)@13                                       |                                                 | -0.0021 | 1877.8866 | 626.9695  | 1877.8887 | 626.9702  | 3 | 26.15 |
|          | 4    | 11.0 | ITNEGPNSELVVR              | No ITRAQ4plex@N-term;<br>Deamidated(N)@3                                                         |                                                 | 0.0238  | 1540.8336 | 514.6185  | 1540.8097 | 514.6105  | 3 | 30.57 |
|          | 4    | 11.0 | MRPQYEEISILK               | ITRAQ4plex@N-term;<br>ITRAQ4plex(K)@12                                                           |                                                 | 0.0025  | 1793.9978 | 599.0065  | 1793.9953 | 599.0057  | 3 | 32.68 |
|          | 4    | 11.0 | NRYMLDLR                   | ITRAQ4plex@N-term;<br>Deamidated(N)@1;<br>Deamidated(R)@2;<br>Oxidation(D)@6                     | missed R-Y@2                                    | 0.0035  | 1241.6232 | 621.8188  | 1241.6196 | 621.8171  | 2 | 31.15 |
|          | 4    | 11.0 | QEFEPDGK                   | Gln->pyro-Glu@N-term;<br>ITRAQ4plex(K)@8                                                         | cleaved S-Q@N-term                              | -0.0032 | 1075.4912 | 538.7529  | 1075.4944 | 538.7545  | 2 | 37.08 |
|          | 4    | 11.0 | VSGAGATNSPLK               | ITRAQ4plex@N-term;<br>Oxidation(P)@10;<br>ITRAQ4plex(K)@12                                       |                                                 | -0.0057 | 1404.7759 | 703.3952  | 1404.7816 | 703.3981  | 2 | 27.55 |
| LIC12958 |      |      |                            |                                                                                                  |                                                 |         |           |           |           |           |   |       |
|          | 2    | 12.9 | DEIYMVK                    | No ITRAQ4plex@N-term;<br>ITRAQ4plex(K)@7                                                         |                                                 | 0.0745  | 1040.6079 | 521.3112  | 1040.5334 | 521.2740  | 2 | 40.79 |
|          | 2    | 12.9 | DKYILR                     | ITRAQ4plex@N-term;<br>ITRAQ4plex(K)@2                                                            | cleaved A-D@N-term; missed K-Y@2                | -0.0264 | 1094.6428 | 548.3287  | 1094.6692 | 548.3419  | 2 | 57.19 |
|          | 2    | 12.9 | ELPIKDEIYMVK               | ITRAQ4plex@N-term;<br>ITRAQ4plex(K)@5;<br>ITRAQ4plex(K)@12                                       |                                                 | -0.0357 | 1909.0603 | 637.3607  | 1909.0960 | 637.3726  | 3 | 57.49 |
| LIC12966 |      |      |                            |                                                                                                  |                                                 |         |           |           |           |           |   |       |
|          | 36.5 | 47.6 | ADAINEASLSLTGITK           | ITRAQ4plex@N-term;<br>ITRAQ4plex(K)@16                                                           |                                                 | 0.0154  | 1891.0660 | 631.3626  | 1891.0506 | 631.3575  | 3 | 49.12 |
|          | 36.5 | 47.6 | AGFAASMATGK                | ITRAQ4plex@N-term;<br>ITRAQ4plex(K)@11                                                           | cleaved V-A@N-term                              | 0.0079  | 1298.6975 | 650.3560  | 1298.6896 | 650.3521  | 2 | 28.37 |
|          | 36.5 | 47.6 | AKGQSWGAK                  | ITRAQ4plex@N-term;<br>ITRAQ4plex(K)@2;<br>ITRAQ4plex(K)@9                                        | missed K-G@2                                    | -0.0734 | 1363.7203 | 682.8674  | 1363.7938 | 682.9042  | 2 | 23.49 |
|          | 36.5 | 47.6 | ANLATYYFSTGDFEK            | ITRAQ4plex@N-term;<br>ITRAQ4plex(K)@15                                                           |                                                 | -0.0024 | 2013.9904 | 672.3374  | 2013.9927 | 672.3382  | 3 | 33.90 |
|          | 36.5 | 47.6 | DVEYVPFK                   | ITRAQ4plex@N-term;<br>ITRAQ4plex(K)@9                                                            | cleaved V-D@N-term                              | 0.0186  | 1380.7720 | 691.3932  | 1380.7533 | 691.3839  | 2 | 42.91 |
|          | 36.5 | 47.6 | DVNTGNEPVSKPTG             | ITRAQ4plex@N-term;<br>ITRAQ4plex(K)@11                                                           | cleaved G-V@C-term                              | -0.0044 | 1701.8733 | 851.9439  | 1701.8777 | 851.9461  | 2 | 25.68 |
|          | 36.5 | 47.6 | DVNTGNEPVSKPTG<br>R        | ITRAQ4plex@N-term;<br>ITRAQ4plex(K)@11                                                           |                                                 | -0.1111 | 1956.9362 | 653.3193  | 1957.0472 | 653.3564  | 3 | 26.99 |
|          | 36.5 | 47.6 | EAWEK                      | ITRAQ4plex@N-term;<br>ITRAQ4plex(K)@5                                                            |                                                 | 0.0059  | 949.5172  | 475.7659  | 949.5113  | 475.7629  | 2 | 27.32 |
|          | 36.5 | 47.6 | ELLQEGYEEIVGETPS<br>FK     | ITRAQ4plex@N-term;<br>ITRAQ4plex(K)@18                                                           |                                                 | -0.0011 | 2355.2078 | 786.0765  | 2355.2089 | 786.0769  | 3 | 35.87 |
|          | 36.5 | 47.6 | EPVSKPTGVR                 | ITRAQ4plex@N-term;<br>ITRAQ4plex(K)@5                                                            | cleaved N-E@N-term                              | -0.0104 | 1356.7865 | 453.2694  | 1356.7969 | 453.2729  | 3 | 26.26 |
|          | 36.5 | 47.6 | GQSWGAK                    | ITRAQ4plex@N-term;<br>ITRAQ4plex(K)@7                                                            |                                                 | -0.0018 | 1020.5579 | 511.2862  | 1020.5596 | 511.2871  | 2 | 25.87 |

|          |      |                                   |                                                                                 |                    |         |           |           |           |           |   |       |
|----------|------|-----------------------------------|---------------------------------------------------------------------------------|--------------------|---------|-----------|-----------|-----------|-----------|---|-------|
| 36.5     | 47.6 | IDAVAAGLK                         | ITRAQ4plex@N-term;<br>ITRAQ4plex(K)@9                                           |                    | -0.0473 | 1144.6587 | 573.3366  | 1144.7059 | 573.3602  | 2 | 29.78 |
| 36.5     | 47.6 | IFNSVGNLECP SIL                   | ITRAQ4plex@N-term;<br>Oxidation(N)@7;<br>Methylthio(C)@10                       | cleaved L-D@C-term | 0.0625  | 1710.9067 | 856.4606  | 1710.8443 | 856.4294  | 2 | 6.62  |
| 36.5     | 47.6 | IFNSVGNLECP SILDSF<br>GGGLDEAAAIK | ITRAQ4plex@N-term;<br>Methylthio(C)@10;<br>ITRAQ4plex(K)@29                     |                    | 0.0036  | 3404.6912 | 1135.9040 | 3404.6876 | 1135.9031 | 3 | 41.99 |
| 36.5     | 47.6 | IGNLIGAEAL IYGYQKP<br>Y           | ITRAQ4plex@N-term;<br>Deamidated(Q)@16;<br>ITRAQ4plex(K)@17;<br>Oxidation(P)@18 | cleaved Y-T@C-term | -0.0729 | 2400.2456 | 801.0891  | 2400.3184 | 801.1134  | 3 | 36.54 |
| 36.5     | 47.6 | IPLDATLIK                         | ITRAQ4plex@N-term;<br>ITRAQ4plex(K)@9                                           | cleaved L-I@N-term | -0.0113 | 1270.7991 | 636.4068  | 1270.8104 | 636.4125  | 2 | 32.34 |
| 36.5     | 47.6 | KSLWEAIFGEGSSFID<br>QMP SK        | ITRAQ4plex@N-term;<br>ITRAQ4plex(K)@1;<br>ITRAQ4plex(K)@21                      | missed K-S@1       | 0.0399  | 2788.4871 | 930.5029  | 2788.4471 | 930.4897  | 3 | 44.78 |
| 36.5     | 47.6 | MMLIPLDATLIK                      | ITRAQ4plex@N-term;<br>ITRAQ4plex(K)@12                                          |                    | -0.0116 | 1645.9639 | 823.9892  | 1645.9754 | 823.9950  | 2 | 36.92 |
| 36.5     | 47.6 | NVGLAVEAPK                        | ITRAQ4plex@N-term;<br>ITRAQ4plex(K)@10                                          |                    | -0.0463 | 1284.7183 | 643.3664  | 1284.7645 | 643.3895  | 2 | 28.23 |
| 36.5     | 47.6 | PVSKPTGVR                         | No ITRAQ4plex@N-term;<br>ITRAQ4plex(K)@4                                        | cleaved E-P@N-term | 0.0040  | 1083.6563 | 542.8354  | 1083.6522 | 542.8334  | 2 | 27.20 |
| 36.5     | 47.6 | RVEATFAVDESNAK                    | No ITRAQ4plex@N-term;<br>ITRAQ4plex(K)@14                                       | missed R-V@1       | -0.0577 | 1679.8024 | 840.9084  | 1679.8600 | 840.9373  | 2 | 24.21 |
| 36.5     | 47.6 | SLWEAIFGEGSSFIDQ<br>MPSK          | ITRAQ4plex@N-term;<br>ITRAQ4plex(K)@20                                          |                    | 0.0059  | 2516.2561 | 839.7593  | 2516.2501 | 839.7573  | 3 | 40.59 |
| 36.5     | 47.6 | SSPAK                             | No ITRAQ4plex@N-term;<br>ITRAQ4plex(K)@5                                        | cleaved V-S@N-term | 0.0052  | 632.3668  | 633.3740  | 632.3615  | 633.3688  | 1 | 51.34 |
| 36.5     | 47.6 | TGNEPVSKPTGVR                     | ITRAQ4plex@N-term;<br>ITRAQ4plex(K)@8                                           | cleaved N-T@N-term | -0.0235 | 1628.8855 | 543.9691  | 1628.9090 | 543.9769  | 3 | 26.30 |
| 36.5     | 47.6 | VAAGLK                            | ITRAQ4plex@N-term;<br>ITRAQ4plex(K)@6                                           | cleaved A-V@N-term | 0.0063  | 845.5641  | 423.7893  | 845.5578  | 423.7862  | 2 | 27.52 |
| 36.5     | 47.6 | VAGFAASMATGK                      | No ITRAQ4plex@N-term;<br>ITRAQ4plex(K)@12                                       |                    | -0.0087 | 1253.6473 | 627.8309  | 1253.6560 | 627.8353  | 2 | 28.91 |
| 36.5     | 47.6 | VEATFAVDESNAK                     | ITRAQ4plex@N-term;<br>ITRAQ4plex(K)@13                                          |                    | 0.0282  | 1667.8892 | 834.9518  | 1667.8610 | 834.9378  | 2 | 58.41 |
| 36.5     | 47.6 | VETGEVK                           | ITRAQ4plex@N-term;<br>ITRAQ4plex(K)@7                                           |                    | 0.0024  | 1048.6031 | 525.3088  | 1048.6008 | 525.3077  | 2 | 25.23 |
| 36.5     | 47.6 | VFEAFDK                           | ITRAQ4plex@N-term;<br>ITRAQ4plex(K)@7                                           |                    | 0.0075  | 1142.6290 | 572.3218  | 1142.6215 | 572.3180  | 2 | 31.76 |
| 36.5     | 47.6 | VFEAFDKESYYK                      | ITRAQ4plex@N-term;<br>ITRAQ4plex(K)@7;<br>ITRAQ4plex(K)@12                      |                    | 0.0365  | 1957.0563 | 653.3594  | 1957.0198 | 653.3472  | 3 | 40.60 |
| 36.5     | 47.6 | VFVKDEDEEVK                       | ITRAQ4plex@N-term;<br>ITRAQ4plex(K)@4;<br>ITRAQ4plex(K)@11                      |                    | -0.0236 | 1767.9384 | 590.3201  | 1767.9620 | 590.3279  | 3 | 30.67 |
| 19.09    | 19.0 | AGFAASMATGKD VNT<br>GNEPVSKPTGVR  | ITRAQ4plex@N-term;<br>ITRAQ4plex(K)@11;<br>ITRAQ4plex(K)@22                     | cleaved V-A@N-term | -7.0968 | 3086.5273 | 618.3127  | 3093.6243 | 619.7321  | 5 | 35.65 |
| 19.09    | 19.0 | DVNTGNEPVSK                       | ITRAQ4plex@N-term;<br>ITRAQ4plex(K)@11                                          | cleaved K-P@C-term | 0.0014  | 1446.7572 | 724.3859  | 1446.7558 | 724.3852  | 2 | 32.64 |
| 19.09    | 19.0 | LSPIVK                            | ITRAQ4plex@N-term;<br>ITRAQ4plex(K)@6                                           |                    | -0.0273 | 943.6037  | 472.8091  | 943.6310  | 472.8228  | 2 | 38.97 |
| 19.09    | 19.0 | LTDL SK                           | ITRAQ4plex@N-term;<br>ITRAQ4plex(K)@6                                           |                    | -0.0022 | 963.5823  | 482.7984  | 963.5844  | 482.7995  | 2 | 37.90 |
| 19.09    | 19.0 | LYEEAMK                           | ITRAQ4plex@N-term;<br>ITRAQ4plex(K)@7                                           |                    | -0.0048 | 1170.6150 | 586.3148  | 1170.6198 | 586.3172  | 2 | 39.28 |
| 19.09    | 19.0 | PVFPK                             | ITRAQ4plex@N-term;<br>Oxidation(P)@1;<br>ITRAQ4plex(K)@5                        | cleaved Y-P@N-term | 0.0566  | 890.6036  | 446.3091  | 890.5469  | 446.2807  | 2 | 42.48 |
| 19.09    | 19.0 | VETGEVKK                          | Carbamy l@N-term;<br>ITRAQ4plex(K)@7;<br>ITRAQ4plex(K)@8                        | missed K-K@7       | -0.0165 | 1219.6852 | 610.8499  | 1219.7016 | 610.8581  | 2 | 34.61 |
| LIC13009 |      |                                   |                                                                                 |                    |         |           |           |           |           |   |       |
| 4.03     | 3.9  | AHGVMQAALEAALR                    | ITRAQ4plex@N-term;<br>Oxidation(H)@2; Oxidation(M)@5                            |                    | -0.0033 | 1612.8444 | 538.6221  | 1612.8477 | 538.6232  | 3 | 44.05 |
| 4.03     | 3.9  | AIGTIGYR                          | ITRAQ4plex@N-term                                                               |                    | -0.0031 | 993.5699  | 497.7922  | 993.5729  | 497.7937  | 2 | 38.71 |
| 6.96     | 7.4  | AVFQKPIEYNLTK                     | ITRAQ4plex@N-term;<br>ITRAQ4plex(K)@5;<br>ITRAQ4plex(K)@14                      |                    | -0.0128 | 2145.2070 | 716.0763  | 2145.2199 | 716.0806  | 3 | 32.76 |
| 4.03     | 3.9  | DKWPLLASGER                       | ITRAQ4plex@N-term;<br>ITRAQ4plex(K)@2                                           | missed K-W@2       | -0.0006 | 1671.9547 | 558.3255  | 1671.9552 | 558.3257  | 3 | 52.41 |

|          |       |      |                               |                                                                                                     |                                        |         |           |           |           |           |   |       |
|----------|-------|------|-------------------------------|-----------------------------------------------------------------------------------------------------|----------------------------------------|---------|-----------|-----------|-----------|-----------|---|-------|
|          | 6.96  | 7.4  | GGTQEOK                       | ITRAQ4plex@N-term;<br>ITRAQ4plex(T)@3;<br>Deamidated(Q)@6;<br>ITRAQ4plex(K)@7                       |                                        | -0.0100 | 1179.6361 | 590.8253  | 1179.6461 | 590.8303  | 2 | 26.25 |
|          | 6.96  | 7.4  | HDDIIPEDIIGGLK                | ITRAQ4plex@N-term;<br>ITRAQ4plex(K)@14                                                              |                                        | -0.0085 | 1821.9995 | 608.3405  | 1822.0080 | 608.3433  | 3 | 35.07 |
|          | 6.96  | 7.4  | IFNDEINQFLENAMAIQ<br>NYNEIAEK | ITRAQ4plex@N-term;<br>Deamidated(N)@7;<br>Deamidated(Q)@8;<br>ITRAQ4plex(Y)@19;<br>ITRAQ4plex(K)@25 |                                        | 0.0233  | 3404.7043 | 1135.9090 | 3404.6812 | 1135.9010 | 3 | 41.68 |
|          | 6.96  | 7.4  | IQTAARAHGVMQAAL<br>EAALRYAR   | ITRAQ4plex@N-term;<br>Deamidated(Q)@12                                                              | missed R-A@6; missed R-Y@20            | 0.0371  | 2612.4463 | 871.8227  | 2612.4091 | 871.8103  | 3 | 3.85  |
|          | 6.96  | 7.4  | SEISSRPSEYGIK                 | ITRAQ4plex@N-term;<br>ITRAQ4plex(K)@13                                                              |                                        | -0.0173 | 1739.9125 | 580.9781  | 1739.9297 | 580.9839  | 3 | 28.80 |
|          | 6.96  | 7.4  | WLPLLASGER                    | ITRAQ4plex@N-term                                                                                   |                                        | 0.0130  | 1284.7443 | 643.3794  | 1284.7312 | 643.3729  | 2 | 34.79 |
| LIC13017 |       |      |                               |                                                                                                     |                                        |         |           |           |           |           |   |       |
|          | 4.08  | 1.9  | ARTIVINANL                    | ITRAQ4plex@N-term;<br>Oxidation(R)@2;<br>Deamidated(N)@7                                            | cleaved L-A@C-term; missed R-T@2       | -0.0107 | 1244.7104 | 623.3625  | 1244.7210 | 623.3678  | 2 | 39.59 |
|          | 4.08  | 1.9  | ILSLK                         | ITRAQ4plex@N-term;<br>ITRAQ4plex(K)@5                                                               | cleaved S-I@N-term                     | 0.0197  | 860.6136  | 431.3141  | 860.5939  | 431.3042  | 2 | 41.65 |
|          | 4.08  | 1.9  | LIPLSAISVGK                   | ITRAQ4plex@N-term;<br>ITRAQ4plex(K)@11                                                              |                                        | 0.0001  | 1384.8899 | 693.4522  | 1384.8897 | 693.4521  | 2 | 46.35 |
|          | 4.08  | 1.9  | LISYQMPVVIANRLKT<br>AGLNVPVGK | No ITRAQ4plex@N-term; No<br>ITRAQ4plex(K)@16;<br>ITRAQ4plex(K)@26                                   | missed R-L@14; missed K-T@16           | -0.1479 | 2925.5481 | 732.3943  | 2925.6960 | 732.4313  | 4 | 52.29 |
| LIC13021 |       |      |                               |                                                                                                     |                                        |         |           |           |           |           |   |       |
|          | 2     | 1.4  | EVPTSLDEMGONFFEK              | ITRAQ4plex@N-term;<br>ITRAQ4plex(S)@5;<br>Deamidated(N)@12;<br>ITRAQ4plex(K)@16                     |                                        | 0.0120  | 2303.1477 | 768.7231  | 2303.1357 | 768.7192  | 3 | 46.04 |
|          | 2     | 1.4  | FEFASLYEANVR                  | ITRAQ4plex@N-term;<br>Deamidated(N)@10                                                              |                                        | -0.0364 | 1589.7484 | 795.8815  | 1589.7848 | 795.8997  | 2 | 52.58 |
|          | 2     | 1.4  | FIGENSLVEK                    | ITRAQ4plex@N-term;<br>Oxidation(N)@5;<br>ITRAQ4plex(K)@10                                           | cleaved F-F@N-term                     | 0.0186  | 1438.8097 | 480.6105  | 1438.7911 | 480.6043  | 3 | 39.47 |
|          | 2     | 1.4  | ISGILK                        | ITRAQ4plex@N-term;<br>ITRAQ4plex(K)@6                                                               | cleaved Q-I@N-term                     | 0.0034  | 917.6187  | 459.8166  | 917.6153  | 459.8149  | 2 | 38.91 |
|          | 2     | 1.4  | IVLPIFAQGDLK                  | ITRAQ4plex@N-term;<br>ITRAQ4plex(K)@12                                                              |                                        | -0.0094 | 1600.9702 | 801.4924  | 1600.9796 | 801.4971  | 2 | 49.88 |
|          | 2     | 1.4  | LANVLDQISGILK                 | ITRAQ4plex@N-term; No<br>ITRAQ4plex(K)@13                                                           |                                        | -0.0276 | 1526.8878 | 764.4512  | 1526.9154 | 764.4650  | 2 | 52.25 |
|          | 2     | 1.4  | VHEL                          | ITRAQ4plex@N-term                                                                                   | cleaved V-V@N-term; cleaved L-M@C-term | 0.0144  | 640.3810  | 641.3883  | 640.3666  | 641.3739  | 1 | 58.72 |
| LIC13046 |       |      |                               |                                                                                                     |                                        |         |           |           |           |           |   |       |
|          | 3.05  | 3.8  | ASIHKNVR                      | ITRAQ4plex@N-term;<br>Oxidation(H)@4;<br>ITRAQ4plex(K)@5;<br>Oxidation(N)@6                         | missed K-N@5                           | 0.0187  | 1243.7428 | 622.8787  | 1243.7241 | 622.8693  | 2 | 54.30 |
|          | 3.05  | 3.8  | ATIETTVGNHTK                  | ITRAQ4plex@N-term;<br>ITRAQ4plex(K)@13                                                              |                                        | -0.0105 | 1659.8929 | 554.3049  | 1659.9035 | 554.3085  | 3 | 26.74 |
|          | 3.05  | 3.8  | FIELLSLFEK                    | ITRAQ4plex@N-term;<br>ITRAQ4plex(K)@10                                                              |                                        | 0.0146  | 1525.9146 | 763.9645  | 1525.9000 | 763.9573  | 2 | 40.30 |
| LIC13050 |       |      |                               |                                                                                                     |                                        |         |           |           |           |           |   |       |
|          | 13.53 | 21.9 | AEPITIDAQGEHTIEAK             | ITRAQ4plex@N-term;<br>Oxidation(P)@3;<br>Oxidation(H)@12;<br>ITRAQ4plex(K)@17                       | cleaved Y-A@N-term                     | 0.0162  | 2142.1211 | 715.0476  | 2142.1048 | 715.0422  | 3 | 47.77 |
|          | 13.53 | 21.9 | AGVNLIK                       | ITRAQ4plex@N-term;<br>Oxidation(N)@4;<br>ITRAQ4plex(K)@7                                            |                                        | 0.0124  | 1017.6550 | 509.8348  | 1017.6426 | 509.8286  | 2 | 44.44 |
|          | 13.53 | 21.9 | AIDNVGNESETK                  | ITRAQ4plex@N-term;<br>ITRAQ4plex(K)@12                                                              |                                        | -0.0001 | 1563.7983 | 782.9064  | 1563.7984 | 782.9065  | 2 | 26.50 |
|          | 13.53 | 21.9 | AIDNVGNESETKK                 | ITRAQ4plex@N-term;<br>ITRAQ4plex(K)@12;<br>ITRAQ4plex(K)@13                                         | missed K-K@12                          | -0.0386 | 1835.9568 | 612.9929  | 1835.9954 | 613.0058  | 3 | 27.75 |
|          | 13.53 | 21.9 | ALVVVVVDNTAPTvk               | ITRAQ4plex@N-term;<br>Deamidated(N)@8;<br>ITRAQ4plex(K)@14                                          |                                        | -0.0530 | 1713.9591 | 857.9868  | 1714.0120 | 858.0133  | 2 | 45.40 |
|          | 13.53 | 21.9 | AVDQSGSIK                     | ITRAQ4plex@N-term;<br>Oxidation(D)@3;<br>Deamidated(Q)@5;<br>ITRAQ4plex(K)@9                        |                                        | 0.0542  | 1178.6929 | 590.3537  | 1178.6387 | 590.3266  | 2 | 45.63 |
|          | 13.53 | 21.9 | DAQGEHTIEAK                   | ITRAQ4plex@N-term;<br>Deamidated(Q)@3;<br>ITRAQ4plex(K)@11                                          | cleaved I-D@N-term                     | -0.0227 | 1486.7280 | 496.5833  | 1486.7507 | 496.5909  | 3 | 26.05 |

|          |       |      |                                  |                                                                                |                                        |         |           |          |           |          |   |       |
|----------|-------|------|----------------------------------|--------------------------------------------------------------------------------|----------------------------------------|---------|-----------|----------|-----------|----------|---|-------|
|          | 13.53 | 21.9 | IGEMDYAK                         | ITRAQ4plex@N-term;<br>ITRAQ4plex(K)@8                                          |                                        | 0.0009  | 1213.6266 | 607.8206 | 1213.6256 | 607.8201 | 2 | 28.90 |
|          | 13.53 | 21.9 | IVPSEILYLDGYNFGSK                | ITRAQ4plex@N-term;<br>ITRAQ4plex(K)@18                                         |                                        | -0.0122 | 2316.2124 | 773.0781 | 2316.2245 | 773.0821 | 3 | 37.11 |
|          | 13.53 | 21.9 | KVEVGTNNGSQSTSESK                | ITRAQ4plex@N-term;<br>ITRAQ4plex(K)@1;<br>Deamidated(N)@8;<br>ITRAQ4plex(K)@17 | cleaved K-P@C-term; missed K-V@1       | -0.0181 | 2184.1055 | 729.0424 | 2184.1235 | 729.0485 | 3 | 27.14 |
|          | 4.18  | 5.5  | PAPAPAAPAAK                      | ITRAQ4plex@N-term;<br>ITRAQ4plex(K)@11                                         | cleaved K-P@N-term; cleaved K-P@C-term | -0.0003 | 1248.7432 | 625.3788 | 1248.7434 | 625.3790 | 2 | 32.63 |
|          | 13.53 | 21.9 | TSQNSGTTQGEEVKK                  | ITRAQ4plex@N-term;<br>ITRAQ4plex(K)@14;<br>ITRAQ4plex(K)@15                    | missed K-K@14                          | -0.0273 | 2025.0430 | 676.0216 | 2025.0704 | 676.0307 | 3 | 26.06 |
|          | 13.53 | 21.9 | YTSPITILK                        | ITRAQ4plex@N-term;<br>ITRAQ4plex(K)@9                                          |                                        | 0.0019  | 1322.8073 | 662.4109 | 1322.8053 | 662.4099 | 2 | 31.82 |
| LIC13056 |       |      |                                  |                                                                                |                                        |         |           |          |           |          |   |       |
|          | 8     | 21.1 | AGMPEVRISAASMGASRPALPNTSPENRSSNR | ITRAQ4plex@N-term;<br>Deamidated(N)@22;<br>Deamidated(N)@31                    | missed R-I@7; missed R-S@28            | 0.1396  | 3456.8357 | 865.2162 | 3456.6960 | 865.1813 | 4 | 57.13 |
|          | 8     | 21.1 | ALNVLHTMIK                       | ITRAQ4plex@N-term;<br>ITRAQ4plex(K)@10                                         |                                        | 0.0096  | 1426.8669 | 476.6296 | 1426.8574 | 476.6264 | 3 | 33.20 |
|          | 8     | 21.1 | FQIEGHTDDTPTGIK                  | ITRAQ4plex@N-term;<br>ITRAQ4plex(K)@15                                         |                                        | -0.0018 | 1945.9971 | 649.6730 | 1945.9989 | 649.6736 | 3 | 30.30 |
|          | 8     | 21.1 | GYTNWELASSR                      | ITRAQ4plex@N-term                                                              |                                        | -0.0032 | 1426.6931 | 714.3538 | 1426.6963 | 714.3554 | 2 | 29.95 |
|          | 8     | 21.1 | GYTNWELASSRNLV<br>LHTMIK         | ITRAQ4plex@N-term;<br>Oxidation(W)@5;<br>Deamidated(R)@11;<br>ITRAQ4plex(K)@21 | missed R-A@11                          | 0.1001  | 2708.5200 | 903.8473 | 2708.4200 | 903.8139 | 3 | 52.66 |
|          | 8     | 21.1 | PALPNTSPENR                      | No ITRAQ4plex@N-term                                                           | cleaved R-P@N-term                     | 0.0044  | 1194.6038 | 598.3091 | 1194.5993 | 598.3069 | 2 | 27.11 |
| LIC10405 |       |      |                                  |                                                                                |                                        |         |           |          |           |          |   |       |
|          | 1.7   | 1.6  | EALGDYLLLENK                     | ITRAQ4plex@N-term;<br>Deamidated(N)@10;<br>ITRAQ4plex(K)@11                    |                                        | 0.0474  | 1552.8702 | 518.6307 | 1552.8228 | 518.6149 | 3 | 32.93 |
|          | 1.7   | 1.6  | QASNLSPNEAK                      | Gln->pyro-Glu@N-term;<br>ITRAQ4plex(K)@11                                      |                                        | -0.0087 | 1284.6345 | 643.3245 | 1284.6432 | 643.3289 | 2 | 34.40 |
| LIC10396 |       |      |                                  |                                                                                |                                        |         |           |          |           |          |   |       |
|          | 5.71  | 13.2 | AAQYLAVQK                        | ITRAQ4plex@N-term;<br>Deamidated(Q)@3;<br>Deamidated(Q)@8;<br>ITRAQ4plex(K)@9  | cleaved F-A@N-term                     | 0.0390  | 1280.7610 | 641.3878 | 1280.7220 | 641.3683 | 2 | 30.05 |
|          | 5.71  | 13.2 | DLSAVDLGVLVSK                    | No ITRAQ4plex@N-term;<br>Methyl(L)@2; Oxidation(D)@6;<br>ITRAQ4plex(K)@13      |                                        | 0.0752  | 1488.9274 | 745.4709 | 1488.8521 | 745.4333 | 2 | 55.51 |
|          | 5.71  | 13.2 | IYLGDADAVLAGGVES<br>MSNAPYVVR    | ITRAQ4plex@N-term                                                              |                                        | 0.0299  | 2710.4058 | 904.4758 | 2710.3758 | 904.4659 | 3 | 51.91 |
|          | 5.71  | 13.2 | LKEEIFVTIPGK                     | ITRAQ4plex@N-term;<br>ITRAQ4plex(K)@2;<br>ITRAQ4plex(K)@13                     |                                        | -0.0229 | 1906.1276 | 636.3831 | 1906.1505 | 636.3908 | 3 | 34.49 |
|          | 2.03  | 3.8  | MGIGPALAIPAALKK                  | ITRAQ4plex@N-term;<br>ITRAQ4plex(K)@14;<br>ITRAQ4plex(K)@15                    | missed K-K@14                          | -0.0163 | 1882.1639 | 628.3953 | 1882.1803 | 628.4007 | 3 | 48.62 |
|          | 5.71  | 13.2 | TGLPLGVPALTLNR                   | ITRAQ4plex@N-term                                                              |                                        | -0.0067 | 1564.9355 | 783.4750 | 1564.9423 | 783.4784 | 2 | 34.33 |
|          | 5.71  | 13.2 | TPFGNFGGTLK                      | ITRAQ4plex@N-term;<br>Deamidated(N)@5;<br>ITRAQ4plex(K)@11                     |                                        | -0.0769 | 1426.6931 | 714.3538 | 1426.7700 | 714.3923 | 2 | 29.95 |
| LIC10380 |       |      |                                  |                                                                                |                                        |         |           |          |           |          |   |       |
|          | 2     | 7.2  | ASIEIYEPLTEHK                    | ITRAQ4plex@N-term;<br>ITRAQ4plex(K)@13                                         |                                        | 0.0064  | 1816.9878 | 606.6699 | 1816.9814 | 606.6678 | 3 | 32.13 |
| LIC10362 |       |      |                                  |                                                                                |                                        |         |           |          |           |          |   |       |
|          | 2     | 7.1  | SNLFKPSVFR                       | ITRAQ4plex@N-term;<br>ITRAQ4plex(K)@5                                          |                                        | -0.0114 | 1481.8484 | 494.9568 | 1481.8598 | 494.9605 | 3 | 49.69 |
| LIC10361 |       |      |                                  |                                                                                |                                        |         |           |          |           |          |   |       |
|          | 15.31 | 36.0 | AENADVIIGGR                      | ITRAQ4plex@N-term;<br>Deamidated(N)@3                                          |                                        | -0.0122 | 1258.6517 | 630.3331 | 1258.6639 | 630.3392 | 2 | 28.97 |
|          | 15.31 | 36.0 | AMGADRAVHIK                      | ITRAQ4plex@N-term;<br>ITRAQ4plex(K)@11                                         | cleaved Y-A@N-term; missed R-A@6       | -0.0247 | 1455.7977 | 486.2732 | 1455.8224 | 486.2814 | 3 | 33.91 |
|          | 15.31 | 36.0 | EIVGLEPPPPR                      | ITRAQ4plex@N-term                                                              | cleaved I-E@N-term                     | -0.0011 | 1346.7670 | 674.3907 | 1346.7680 | 674.3913 | 2 | 30.39 |
|          | 15.31 | 36.0 | EVEGGTQTVETSTPVALTAQK            | ITRAQ4plex@N-term;<br>ITRAQ4plex(K)@21                                         |                                        | -0.0300 | 2433.2544 | 812.0920 | 2433.2842 | 812.1020 | 3 | 29.41 |
|          | 12.35 | 26.5 | GGEVIAVSLGPDR                    | ITRAQ4plex@N-term                                                              | cleaved H-G@N-term                     | 4.9589  | 1417.7334 | 709.8740 | 1412.7745 | 707.3945 | 2 | 48.88 |
|          | 15.31 | 36.0 | GLEPP                            | ITRAQ4plex@N-term                                                              | cleaved V-G@N-term; cleaved P-P@C-term | 0.0043  | 655.3706  | 656.3779 | 655.3663  | 656.3736 | 1 | 55.94 |
|          | 12.35 | 26.5 | HGGEVIAVSLGPDR                   | Carbamyl@N-term                                                                |                                        | 0.0733  | 1448.8105 | 725.4125 | 1448.7372 | 725.3759 | 2 | 54.66 |
|          | 15.31 | 36.0 | IIEVGLEPPPPR                     | ITRAQ4plex@N-term                                                              |                                        | -0.0138 | 1459.8383 | 730.9264 | 1459.8520 | 730.9333 | 2 | 32.28 |
|          | 15.31 | 36.0 | IIVLVK                           | ITRAQ4plex@N-term;<br>ITRAQ4plex(K)@6                                          |                                        | -0.0004 | 971.6983  | 486.8564 | 971.6987  | 486.8566 | 2 | 57.82 |

|          |      |                           |                                                                                        |                                            |         |           |           |           |           |   |       |
|----------|------|---------------------------|----------------------------------------------------------------------------------------|--------------------------------------------|---------|-----------|-----------|-----------|-----------|---|-------|
| 15.31    | 36.0 | ISPYDEFAIEEGIRLR          | ITRAQ4plex@N-term                                                                      | cleaved I-I@N-term; missed R-L@14          | -0.0466 | 2051.0342 | 1026.5240 | 2051.0809 | 1026.5477 | 2 | 40.78 |
| 15.31    | 36.0 | PDTETSIK                  | No ITRAQ4plex@N-term; ITRAQ4plex(K)@8                                                  | cleaved V-P@N-term                         | 0.0026  | 1033.5439 | 517.7792  | 1033.5413 | 517.7779  | 2 | 37.54 |
| 12.35    | 26.5 | PVALTAQKGLNEPR            | No ITRAQ4plex@N-term; ITRAQ4plex(K)@8; Deamidated(N)@11                                | cleaved T-P@N-term; missed K-G@8           | 0.0766  | 1637.9989 | 820.0067  | 1637.9223 | 819.9684  | 2 | 56.85 |
| 15.31    | 36.0 | QVPDTETSIK                | Gln->pyro-Glu@N-term; ITRAQ4plex(K)@10                                                 |                                            | -0.0028 | 1243.6390 | 622.8268  | 1243.6418 | 622.8282  | 2 | 37.49 |
| 15.31    | 36.0 | SAADLGSPASK               | ITRAQ4plex@N-term; ITRAQ4plex(K)@11                                                    |                                            | -0.0039 | 1290.6984 | 646.3564  | 1290.7023 | 646.3584  | 2 | 25.47 |
| 12.35    | 26.5 | SINETGIK                  | ITRAQ4plex@N-term; ITRAQ4plex(K)@8                                                     |                                            | 0.0008  | 1148.6653 | 575.3399  | 1148.6645 | 575.3395  | 2 | 35.61 |
| 12.35    | 26.5 | SLKGIMTAK                 | Acetyl@N-term; ITRAQ4plex(K)@3; ITRAQ4plex(K)@9                                        | cleaved P-S@N-term; missed K-G@3           | 0.0256  | 1277.7876 | 426.9365  | 1277.7621 | 426.9280  | 3 | 43.85 |
| 12.35    | 26.5 | TAYAMGADR                 | ITRAQ4plex@N-term; ITRAQ4plex(Y)@3                                                     |                                            | 0.0054  | 1242.6324 | 415.2181  | 1242.6270 | 415.2163  | 3 | 35.62 |
| 15.31    | 36.0 | VDNYVPFDNNTAELI<br>SNFAK  | ITRAQ4plex@N-term; Deamidated(N)@11; ITRAQ4plex(K)@21                                  |                                            | 0.0085  | 2660.3298 | 887.7839  | 2660.3213 | 887.7811  | 3 | 36.75 |
| 15.31    | 36.0 | WIISPYDEFAIEEGIR          | ITRAQ4plex@N-term                                                                      |                                            | 0.0146  | 2081.0737 | 1041.5440 | 2081.0591 | 1041.5368 | 2 | 38.81 |
| 15.31    | 36.0 | YPSLKGIMTAK               | ITRAQ4plex@N-term; Acetyl(S)@3; No ITRAQ4plex(K)@5; ITRAQ4plex(K)@11                   | missed K-G@5                               | 0.0407  | 1537.9189 | 513.6469  | 1537.8782 | 513.6333  | 3 | 32.45 |
| LIC10360 |      |                           |                                                                                        |                                            |         |           |           |           |           |   |       |
| 25.75    | 45.8 | AGAGAVEATS                | ITRAQ4plex@N-term; Dehydrated(T)@9; Dehydrated(S)@10                                   | cleaved S-P@C-term                         | -0.0032 | 940.4705  | 471.2425  | 940.4736  | 471.2441  | 2 | 25.03 |
| 25.75    | 45.8 | AGAGAVEATSPSAGN<br>A      | ITRAQ4plex@N-term                                                                      | cleaved A-K@C-term                         | -0.0151 | 1473.7030 | 737.8588  | 1473.7181 | 737.8663  | 2 | 33.63 |
| 25.75    | 45.8 | AGAGAVEATSPSAGN<br>AK     | ITRAQ4plex@N-term; Deamidated(N)@15; ITRAQ4plex(K)@17                                  |                                            | 0.0061  | 1746.9054 | 874.4600  | 1746.8992 | 874.4569  | 2 | 25.52 |
| 18.92    | 38.6 | AQNPAVLLPHTSQG<br>K       | ITRAQ4plex@N-term; ITRAQ4plex(K)@16                                                    |                                            | 0.0116  | 1947.1261 | 650.0493  | 1947.1145 | 650.0455  | 3 | 43.95 |
| 25.75    | 45.8 | AYANFK                    | ITRAQ4plex@N-term; ITRAQ4plex(K)@6                                                     |                                            | 0.0013  | 1000.5598 | 501.2872  | 1000.5586 | 501.2866  | 2 | 28.66 |
| 25.75    | 45.8 | GPENWPIQLADTL<br>GAALGASR | ITRAQ4plex@N-term; Cation:K(E)@10                                                      |                                            | 0.0235  | 2560.3044 | 854.4421  | 2560.2810 | 854.4343  | 3 | 5.95  |
| 18.92    | 38.6 | IADSIGGK                  | ITRAQ4plex@N-term; ITRAQ4plex(K)@8                                                     |                                            | 0.0146  | 1047.6313 | 524.8229  | 1047.6168 | 524.8157  | 2 | 36.90 |
| 18.92    | 38.6 | ISREITSAGRKIADSIG<br>GK   | ITRAQ4plex@N-term; Oxidation(R)@3; ITRAQ4plex(K)@11; Oxidation(D)@14; ITRAQ4plex(K)@19 | missed R-E@3; missed R-K@10; missed K-I@11 | -0.0046 | 2422.3823 | 808.4681  | 2422.3869 | 808.4696  | 3 | 58.31 |
| 25.75    | 45.8 | IVAINK                    | ITRAQ4plex@N-term; ITRAQ4plex(K)@6                                                     | cleaved Y-I@N-term                         | -0.0048 | 944.6215  | 473.3180  | 944.6262  | 473.3204  | 2 | 30.42 |
| 25.75    | 45.8 | IVGELK                    | ITRAQ4plex@N-term; ITRAQ4plex(K)@6                                                     | cleaved F-I@N-term                         | 0.0337  | 945.6439  | 473.8292  | 945.6103  | 473.8124  | 2 | 49.84 |
| 25.75    | 45.8 | IVSSDLSGGSK               | ITRAQ4plex@N-term; ITRAQ4plex(K)@11                                                    |                                            | -0.1367 | 1336.6074 | 669.3110  | 1336.7442 | 669.3794  | 2 | 32.84 |
| 25.75    | 45.8 | KISREITSAGR               | ITRAQ4plex@N-term; ITRAQ4plex(K)@1                                                     | missed K-I@1; missed R-E@4                 | 0.0610  | 1504.9539 | 502.6586  | 1504.8929 | 502.6382  | 3 | 41.31 |
| 25.75    | 45.8 | PNSQEITQK                 | ITRAQ4plex@N-term; ITRAQ4plex(K)@9                                                     | cleaved R-P@N-term                         | -0.0031 | 1331.7258 | 666.8702  | 1331.7289 | 666.8717  | 2 | 25.53 |
| 25.75    | 45.8 | SNVFIVGELK                | ITRAQ4plex@N-term; ITRAQ4plex(K)@10                                                    | cleaved M-S@N-term                         | -0.0196 | 1392.8025 | 697.4085  | 1392.8220 | 697.4183  | 2 | 41.62 |
| 25.75    | 45.8 | SNVFIVGELKDGEL            | ITRAQ4plex@N-term; Oxidation(F)@4; ITRAQ4plex(K)@10                                    | cleaved M-S@N-term; cleaved L-K@C-term     | 0.0547  | 1823.0468 | 608.6895  | 1822.9920 | 608.6713  | 3 | 34.10 |
| 25.75    | 45.8 | TVRPNSQEITQK              | ITRAQ4plex@N-term; ITRAQ4plex(K)@12                                                    | cleaved F-T@N-term                         | -0.0179 | 1687.9281 | 563.6500  | 1687.9461 | 563.6560  | 3 | 26.57 |
| 25.75    | 45.8 | VATYGVGLDFEVVPA<br>VTAEFK | ITRAQ4plex@N-term; ITRAQ4plex(K)@22                                                    |                                            | 0.0117  | 2612.4463 | 871.8227  | 2612.4345 | 871.8188  | 3 | 3.85  |
| 25.75    | 45.8 | VGAGIADVVGFVSDG<br>GK     | ITRAQ4plex@N-term; ITRAQ4plex(K)@18                                                    |                                            | 0.0057  | 1948.0929 | 650.3716  | 1948.0873 | 650.3697  | 3 | 37.32 |
| 25.75    | 45.8 | VIALLIGNGVEK              | ITRAQ4plex@N-term; Deamidated(N)@8; ITRAQ4plex(K)@12                                   |                                            | 0.0052  | 1513.9375 | 757.9760  | 1513.9323 | 757.9734  | 2 | 51.84 |
| 25.75    | 45.8 | VQLTEASIVSGGR             | ITRAQ4plex@N-term                                                                      |                                            | -0.0008 | 1572.8949 | 787.4547  | 1572.8957 | 787.4551  | 2 | 44.75 |
| 25.75    | 45.8 | VSSDLSGGSK                | ITRAQ4plex@N-term; ITRAQ4plex(K)@10                                                    | cleaved I-V@N-term                         | 0.0061  | 1223.6663 | 612.8404  | 1223.6601 | 612.8373  | 2 | 25.71 |
| 25.75    | 45.8 | VTSPIQIFTVRPN             | ITRAQ4plex@N-term                                                                      | cleaved N-S@C-term                         | -0.0072 | 1614.9143 | 808.4644  | 1614.9215 | 808.4680  | 2 | 34.16 |



|          |       |      |                       |                                                                                                          |                                                      |         |           |          |           |          |   |       |
|----------|-------|------|-----------------------|----------------------------------------------------------------------------------------------------------|------------------------------------------------------|---------|-----------|----------|-----------|----------|---|-------|
|          | 25.75 | 45.8 | VTSPQIIVTRPNSQEITQK   | ITRAQ4plex@N-term; Deamidated(N)@13; ITRAQ4plex(K)@20                                                    |                                                      | -0.0063 | 2574.4199 | 859.1472 | 2574.4261 | 859.1493 | 3 | 34.03 |
|          | 25.75 | 45.8 | YIVAINK               | ITRAQ4plex@N-term; ITRAQ4plex(K)@7                                                                       |                                                      | -0.0057 | 1107.6838 | 554.8492 | 1107.6896 | 554.8521 | 2 | 29.70 |
| LIC10351 |       |      |                       |                                                                                                          |                                                      |         |           |          |           |          |   |       |
|          | 3.7   | 10.9 | ENQIEFLPMGGIDLR       | ITRAQ4plex@N-term; Deamidated(N)@2; Deamidated(Q)@3; Deamidated(R)@15                                    |                                                      | -0.0553 | 1877.8650 | 626.9623 | 1877.9203 | 626.9807 | 3 | 26.37 |
|          | 3.7   | 10.9 | ISIPGFLTGEELTFSGK     | ITRAQ4plex@N-term; ITRAQ4plex(K)@18                                                                      |                                                      | 0.0148  | 2230.2278 | 744.4165 | 2230.2129 | 744.4116 | 3 | 39.37 |
|          | 3.7   | 10.9 | KIPAELVALGANILK       | ITRAQ4plex@N-term; ITRAQ4plex(K)@1; ITRAQ4plex(K)@15                                                     | missed K-I@1                                         | -0.0151 | 1981.2513 | 661.4244 | 1981.2665 | 661.4294 | 3 | 39.36 |
|          | 3.7   | 10.9 | LKEGK                 | ITRAQ4plex@N-term; ITRAQ4plex(K)@2; ITRAQ4plex(K)@5                                                      | cleaved S-L@N-term                                   | -0.0604 | 1005.5944 | 503.8045 | 1005.6548 | 503.8347 | 2 | 28.70 |
| LIC10344 |       |      |                       |                                                                                                          |                                                      |         |           |          |           |          |   |       |
|          | 4     | 13.6 | DIGHSDEVEAK           | ITRAQ4plex@N-term; ITRAQ4plex(K)@11                                                                      | cleaved L-D@N-term                                   | -0.0242 | 1486.7264 | 496.5828 | 1486.7507 | 496.5909 | 3 | 26.15 |
|          | 2     | 10.2 | HTLVALNGR             | No ITRAQ4plex@N-term; Deamidated(N)@7                                                                    |                                                      | 0.0022  | 980.5425  | 491.2785 | 980.5403  | 491.2774 | 2 | 39.21 |
|          | 2     | 10.2 | ISSSG                 | ITRAQ4plex@N-term                                                                                        | cleaved Y-I@N-term; cleaved G-D@C-term               | 0.0195  | 593.3337  | 594.3409 | 593.3142  | 594.3215 | 1 | 50.51 |
|          | 4     | 13.6 | LDIGHSDEVEAK          | ITRAQ4plex@N-term; ITRAQ4plex(K)@12                                                                      |                                                      | -0.0100 | 1599.8248 | 534.2822 | 1599.8348 | 534.2855 | 3 | 29.03 |
| LIC10339 |       |      |                       |                                                                                                          |                                                      |         |           |          |           |          |   |       |
|          | 2     | 2.0  | AQEYEKAAGVR           | ITRAQ4plex@N-term; Oxidation(Y)@4; ITRAQ4plex(K)@6                                                       | missed K-A@6                                         | 0.0692  | 1524.8832 | 509.3017 | 1524.8140 | 509.2786 | 3 | 38.48 |
|          | 2     | 2.0  | ILNNLNINLNELRK        | ITRAQ4plex@N-term; Deamidated(N)@3; Deamidated(N)@4; Deamidated(N)@8; Deamidated(N)@10; ITRAQ4plex(K)@14 | missed R-K@13                                        | -0.0840 | 1972.0244 | 658.3488 | 1972.1084 | 658.3768 | 3 | 58.23 |
|          | 2     | 2.0  | KILNN                 | ITRAQ4plex@N-term; ITRAQ4plex(K)@1                                                                       | cleaved I-K@N-term; cleaved N-L@C-term; missed K-I@1 | 0.0187  | 888.5823  | 445.2984 | 888.5636  | 445.2891 | 2 | 63.02 |
|          | 2     | 2.0  | NDRYLPDKAIDIIDEAGAK   | ITRAQ4plex@N-term; Deamidated(N)@1; ITRAQ4plex(K)@8; ITRAQ4plex(K)@19                                    | cleaved I-N@N-term; missed R-Y@3; missed K-A@8       | -0.0661 | 2549.3042 | 638.3333 | 2549.3703 | 638.3498 | 4 | 57.05 |
|          | 2     | 2.0  | NLNELRKEVER           | ITRAQ4plex@N-term; Oxidation(R)@6; ITRAQ4plex(K)@7                                                       | cleaved I-N@N-term; missed R-K@6                     | -0.0028 | 1702.9541 | 568.6586 | 1702.9570 | 568.6596 | 3 | 35.42 |
|          | 2     | 2.0  | RTREASGALLMDVAGQDRYQK | ITRAQ4plex@N-term; Oxidation(R)@19; ITRAQ4plex(Y)@20; ITRAQ4plex(K)@22                                   | missed R-T@1; missed R-E@3; missed R-Y@19            | -0.0657 | 2869.4536 | 957.4918 | 2869.5194 | 957.5137 | 3 | 53.78 |
|          | 2     | 2.0  | SFSVYNNVIK            | ITRAQ4plex@N-term; ITRAQ4plex(K)@10                                                                      | cleaved Y-S@N-term                                   | 0.0269  | 1457.8391 | 729.9268 | 1457.8122 | 729.9134 | 2 | 48.64 |
|          | 2     | 2.0  | SIILLDEIEK            | ITRAQ4plex@N-term; ITRAQ4plex(K)@10                                                                      | cleaved Y-S@N-term                                   | -0.0753 | 1459.7990 | 730.9067 | 1459.8741 | 730.9443 | 2 | 32.76 |
|          | 2     | 2.0  | TPILDEFARDLTQLAR      | ITRAQ4plex@N-term; Deamidated(Q)@13                                                                      | missed R-D@9                                         | 0.0306  | 2003.1116 | 668.7111 | 2003.0809 | 668.7009 | 3 | 31.23 |
|          | 2     | 2.0  | VAEPSVDDAIQIQGLK      | ITRAQ4plex@N-term; ITRAQ4plex(K)@17                                                                      |                                                      | -0.0073 | 2083.1694 | 695.3971 | 2083.1769 | 695.3996 | 3 | 37.85 |
| LIC10325 |       |      |                       |                                                                                                          |                                                      |         |           |          |           |          |   |       |
|          | 10    | 16.1 | AAALFQEATDK           | ITRAQ4plex@N-term; Deamidated(Q)@6; ITRAQ4plex(K)@11                                                     |                                                      | 0.0110  | 1452.7815 | 727.3980 | 1452.7704 | 727.3925 | 2 | 30.14 |
|          | 10    | 16.1 | AAALFQEATDKYPDSPVGR   | ITRAQ4plex@N-term; ITRAQ4plex(K)@11                                                                      | missed K-Y@11                                        | -0.0210 | 2323.1843 | 775.4020 | 2323.2052 | 775.4090 | 3 | 33.18 |
|          | 10    | 16.1 | AVDIFSELSAR           | ITRAQ4plex@N-term                                                                                        |                                                      | 0.0039  | 1350.7305 | 676.3725 | 1350.7265 | 676.3705 | 2 | 44.94 |
|          | 10    | 16.1 | EIPEEHSFR             | ITRAQ4plex@N-term                                                                                        |                                                      | -0.0082 | 1286.6295 | 429.8838 | 1286.6377 | 429.8865 | 3 | 28.74 |
|          | 10    | 16.1 | ESLDQVEDNLHYK         | ITRAQ4plex@N-term; ITRAQ4plex(K)@13                                                                      |                                                      | 0.0083  | 1876.9493 | 626.6570 | 1876.9410 | 626.6543 | 3 | 31.37 |
|          | 10    | 16.1 | SAWK                  | No ITRAQ4plex@N-term; ITRAQ4plex(K)@4                                                                    | cleaved A-S@N-term                                   | -0.0110 | 634.3450  | 635.3523 | 634.3560  | 635.3633 | 1 | 37.78 |
|          | 10    | 16.1 | SGILEKAR              | No ITRAQ4plex@N-term; ITRAQ4plex(K)@6                                                                    | missed K-A@6                                         | -0.0347 | 1016.5753 | 509.2949 | 1016.6100 | 509.3123 | 2 | 30.16 |
|          | 10    | 16.1 | SKEDLETEKLD           | ITRAQ4plex@N-term; ITRAQ4plex(K)@2; ITRAQ4plex(K)@9                                                      | missed K-L@9                                         | -0.0404 | 1737.8958 | 580.3058 | 1737.9362 | 580.3193 | 3 | 30.03 |
| LIC10318 |       |      |                       |                                                                                                          |                                                      |         |           |          |           |          |   |       |
|          | 4     | 3.6  | ISLTRFR               | ITRAQ4plex@N-term                                                                                        | cleaved N-I@N-term                                   | 0.0515  | 879.5815  | 440.7980 | 879.5300  | 440.7723 | 2 | 42.23 |

|          |       |      |                    |                                                                                                   |                                           |         |           |          |           |          |   |       |  |
|----------|-------|------|--------------------|---------------------------------------------------------------------------------------------------|-------------------------------------------|---------|-----------|----------|-----------|----------|---|-------|--|
| LIC10314 |       |      |                    |                                                                                                   |                                           |         |           |          |           |          |   |       |  |
|          | 4.03  | 4.9  | AGEEVRGTNEK        | No ITRAQ4plex@N-term;<br>ITRAQ4plex(K)@11                                                         | missed R-G@6                              | -0.0168 | 1332.6588 | 667.3367 | 1332.6755 | 667.3450 | 2 | 37.18 |  |
|          | 4.03  | 4.9  | DVHTDELEDEVNK      | ITRAQ4plex@N-term;<br>ITRAQ4plex(K)@13                                                            |                                           | -0.0060 | 1829.8826 | 610.9681 | 1829.8887 | 610.9702 | 3 | 28.75 |  |
|          | 4.03  | 4.9  | ELEELKR            | ITRAQ4plex@N-term;<br>ITRAQ4plex(K)@6                                                             | missed K-R@6                              | -0.0003 | 1203.7064 | 402.2427 | 1203.7067 | 402.2428 | 3 | 29.74 |  |
|          | 5.82  | 4.0  | FVTPQSIGISK        | ITRAQ4plex@N-term;<br>ITRAQ4plex(K)@11                                                            |                                           | -0.0035 | 1463.8557 | 732.9351 | 1463.8591 | 732.9369 | 2 | 42.89 |  |
|          | 4.03  | 4.9  | GDFNK              | ITRAQ4plex@N-term;<br>ITRAQ4plex(K)@5                                                             |                                           | 0.0068  | 867.4763  | 434.7454 | 867.4694  | 434.7420 | 2 | 24.95 |  |
|          | 5.82  | 4.0  | IGISK              | ITRAQ4plex@N-term;<br>ITRAQ4plex(K)@5                                                             | cleaved S-I@N-term                        | 0.0044  | 804.5357  | 403.2751 | 804.5313  | 403.2729 | 2 | 38.14 |  |
|          | 5.82  | 4.0  | ILFLK              | ITRAQ4plex@N-term;<br>ITRAQ4plex(K)@5                                                             |                                           | 0.0076  | 920.6379  | 461.3262 | 920.6303  | 461.3224 | 2 | 46.28 |  |
|          | 4.03  | 4.9  | LQNEK              | ITRAQ4plex@N-term;<br>ITRAQ4plex(K)@5                                                             | cleaved D-L@N-term                        | -0.0032 | 918.5347  | 460.2746 | 918.5378  | 460.2762 | 2 | 23.70 |  |
|          | 5.82  | 4.0  | SDSSSSKSGSDK       | No ITRAQ4plex@N-term;<br>Oxidation(D)@2;<br>ITRAQ4plex(K)@7;<br>ITRAQ4plex(K)@12                  | missed K-S@7                              | -0.0028 | 1474.6963 | 738.3554 | 1474.6991 | 738.3568 | 2 | 53.73 |  |
|          | 5.82  | 4.0  | THTQGGISVTR        | ITRAQ4plex@N-term                                                                                 |                                           | 0.0003  | 1299.7020 | 434.2413 | 1299.7017 | 434.2412 | 3 | 35.35 |  |
|          | 4.03  | 4.9  | TQILIPLEDVLGK      | ITRAQ4plex@N-term;<br>ITRAQ4plex(K)@14                                                            |                                           | 0.0253  | 1825.1422 | 913.5784 | 1825.1168 | 913.5657 | 2 | 0.17  |  |
|          | 5.82  | 4.0  | VGSLAESLK          | Carbaryl@N-term;<br>ITRAQ4plex(K)@10                                                              |                                           | -0.0046 | 1146.6321 | 574.3233 | 1146.6366 | 574.3256 | 2 | 43.15 |  |
|          | 4.03  | 4.9  | VRFINRSSARAGEEVR   | ITRAQ4plex@N-term;<br>Deamidated(R)@10                                                            | missed R-F@2; missed R-S@6; missed R-A@10 | -0.1034 | 1990.9747 | 664.6655 | 1991.0783 | 664.7000 | 3 | 31.86 |  |
| LIC10301 |       |      |                    |                                                                                                   |                                           |         |           |          |           |          |   |       |  |
|          | 3.4   | 17.7 | EELILGDVVK         | ITRAQ4plex@N-term;<br>ITRAQ4plex(K)@10                                                            |                                           | -0.0557 | 1488.7875 | 745.4010 | 1488.8432 | 745.4289 | 2 | 9.10  |  |
|          | 3.4   | 17.7 | KEELILGDVVK        | ITRAQ4plex@N-term;<br>ITRAQ4plex(K)@1;<br>ITRAQ4plex(K)@11                                        |                                           | -0.0234 | 1761.0168 | 588.0129 | 1761.0402 | 588.0207 | 3 | 40.03 |  |
|          | 3.4   | 17.7 | KTNAEEYFEK         | ITRAQ4plex@N-term;<br>ITRAQ4plex(K)@1;<br>ITRAQ4plex(T)@2;<br>Oxidation(Y)@7;<br>ITRAQ4plex(K)@10 | missed K-T@1                              | 0.0079  | 1849.9988 | 617.6735 | 1849.9909 | 617.6709 | 3 | 42.46 |  |
|          | 1.78  | 8.0  | NHLQIFPQGLAK       | No ITRAQ4plex@N-term;<br>ITRAQ4plex(K)@12                                                         |                                           | -0.0517 | 1508.8069 | 755.4107 | 1508.8585 | 755.4365 | 2 | 52.50 |  |
|          | 3.4   | 17.7 | YDAFHLYTK          | ITRAQ4plex@N-term;<br>ITRAQ4plex(K)@9                                                             |                                           | 0.0013  | 1444.7607 | 482.5942 | 1444.7594 | 482.5938 | 3 | 32.24 |  |
| LIC10290 |       |      |                    |                                                                                                   |                                           |         |           |          |           |          |   |       |  |
|          | 8.45  | 10.9 | ATQEIVTALK         | ITRAQ4plex@N-term;<br>ITRAQ4plex(K)@10                                                            |                                           | -0.0060 | 1360.8109 | 681.4127 | 1360.8169 | 681.4158 | 2 | 30.26 |  |
|          | 8.45  | 10.9 | DLYNILTDR          | ITRAQ4plex@N-term                                                                                 |                                           | -0.0134 | 1265.6604 | 633.8375 | 1265.6738 | 633.8442 | 2 | 33.46 |  |
|          | 7.83  | 12.9 | EIVTALK            | ITRAQ4plex@N-term;<br>ITRAQ4plex(K)@7                                                             | cleaved Q-E@N-term                        | 0.0161  | 1060.6897 | 531.3521 | 1060.6736 | 531.3441 | 2 | 49.03 |  |
|          | 8.45  | 10.9 | GIDVEFAIHPVAGR     | ITRAQ4plex@N-term                                                                                 |                                           | 0.0095  | 1623.8950 | 542.3056 | 1623.8855 | 542.3024 | 3 | 58.82 |  |
|          | 7.83  | 12.9 | GVYLSVK            | ITRAQ4plex@N-term;<br>ITRAQ4plex(K)@7                                                             | cleaved I-G@N-term                        | -0.0506 | 1052.5968 | 527.3057 | 1052.6474 | 527.3310 | 2 | 43.90 |  |
|          | 8.45  | 10.9 | INLIYLLSSILFI      | ITRAQ4plex@N-term                                                                                 | cleaved I-I@N-term; cleaved I-H@C-term    | -0.0950 | 1664.9290 | 833.4717 | 1665.0239 | 833.5192 | 2 | 38.00 |  |
|          | 8.45  | 10.9 | KATQEIVTALK        | ITRAQ4plex@N-term;<br>ITRAQ4plex(K)@1;<br>ITRAQ4plex(K)@11                                        | missed K-A@1                              | -0.1285 | 1632.8855 | 545.3024 | 1633.0140 | 545.3453 | 3 | 32.88 |  |
|          | 8.45  | 10.9 | LLSHPKTAVR         | ITRAQ4plex@N-term;<br>ITRAQ4plex(K)@6                                                             | missed K-T@6                              | 0.0914  | 1408.9672 | 705.4908 | 1408.8758 | 705.4452 | 2 | 55.30 |  |
|          | 8.45  | 10.9 | SLPNVLFGGGLAAVDNSK | ITRAQ4plex@N-term;<br>ITRAQ4plex(K)@18                                                            |                                           | 0.0023  | 2046.1377 | 683.0532 | 2046.1353 | 683.0524 | 3 | 36.10 |  |
|          | 8.45  | 10.9 | TDPGSPGIAGMPIL     | ITRAQ4plex@N-term;<br>Oxidation(P)@11                                                             | cleaved L-D@C-term                        | 0.0865  | 1427.8318 | 714.9232 | 1427.7452 | 714.8799 | 2 | 28.49 |  |
|          | 8.45  | 10.9 | TDPGSPGIAGMPILDVDK | ITRAQ4plex@N-term;<br>Oxidation(P)@11;<br>Oxidation(D)@16;<br>ITRAQ4plex(K)@17                    |                                           | 0.0303  | 2045.0897 | 682.7039 | 2045.0594 | 682.6938 | 3 | 38.90 |  |
|          | 7.83  | 12.9 | TVIVIK             | ITRAQ4plex@N-term;<br>ITRAQ4plex(K)@6                                                             |                                           | 0.0071  | 959.6694  | 480.8420 | 959.6623  | 480.8384 | 2 | 40.35 |  |
|          | 8.45  | 10.9 | VVIVPGYGMVAQAQHAVR | ITRAQ4plex@N-term                                                                                 |                                           | 1.0058  | 2110.1697 | 704.3972 | 2109.1639 | 704.0619 | 3 | 58.97 |  |
| LIC10253 |       |      |                    |                                                                                                   |                                           |         |           |          |           |          |   |       |  |
|          | 11.92 | 18.7 | AIWDIAGK           | ITRAQ4plex@N-term;<br>ITRAQ4plex(K)@8                                                             |                                           | 0.0034  | 1160.6831 | 581.3488 | 1160.6797 | 581.3471 | 2 | 38.60 |  |
|          | 11.92 | 18.7 | FNHWGALTSEINK      | ITRAQ4plex@N-term;<br>ITRAQ4plex(K)@13                                                            |                                           | 0.0098  | 1803.9609 | 602.3276 | 1803.9512 | 602.3243 | 3 | 33.17 |  |

|          |       |      |                        |                                                                                                        |                                        |         |           |          |           |          |   |       |
|----------|-------|------|------------------------|--------------------------------------------------------------------------------------------------------|----------------------------------------|---------|-----------|----------|-----------|----------|---|-------|
|          | 11.92 | 18.7 | GLNDLVIDKK             | ITRAQ4plex@N-term;<br>ITRAQ4plex(K)@9;<br>ITRAQ4plex(K)@10                                             | missed K-K@9                           | -0.0283 | 1545.9174 | 516.3130 | 1545.9456 | 516.3225 | 3 | 32.86 |
|          | 11.92 | 18.7 | LQGSHFANDENSK          | ITRAQ4plex@N-term;<br>Deamidated(N)@8;<br>ITRAQ4plex(K)@13                                             |                                        | 0.0065  | 1734.8481 | 579.2900 | 1734.8417 | 579.2878 | 3 | 26.94 |
|          | 4.66  | 5.5  | MYAQVVRPER             | Carbamyl@N-term                                                                                        |                                        | -0.0099 | 1290.6405 | 646.3275 | 1290.6503 | 646.3324 | 2 | 40.14 |
|          | 11.92 | 18.7 | QGSHFANDENSK           | ITRAQ4plex@N-term;<br>Deamidated(N)@7;<br>ITRAQ4plex(K)@12                                             | cleaved L-Q@N-term                     | 0.0590  | 1621.8168 | 541.6129 | 1621.7576 | 541.5931 | 3 | 26.75 |
|          | 11.92 | 18.7 | RLQGSHFANDENSK         | ITRAQ4plex@N-term;<br>Oxidation(N)@12;<br>ITRAQ4plex(K)@14                                             | missed R-L@1                           | 0.0553  | 1906.0090 | 636.3436 | 1905.9537 | 636.3252 | 3 | 32.97 |
|          | 11.92 | 18.7 | SQIESVPIGTLPLGQ<br>VPK | ITRAQ4plex@N-term;<br>ITRAQ4plex(K)@19                                                                 | cleaved M-S@N-term                     | 0.0073  | 2247.3154 | 750.1124 | 2247.3082 | 750.1100 | 3 | 33.51 |
|          | 11.92 | 18.7 | VGDEVVLHCGIWDK         | ITRAQ4plex@N-term;<br>Methylthio(C)@9;<br>ITRAQ4plex(K)@14                                             |                                        | 0.0997  | 1903.0573 | 635.3597 | 1902.9576 | 635.3265 | 3 | 58.08 |
|          | 11.92 | 18.7 | YAQVVRPER              | ITRAQ4plex@N-term                                                                                      | cleaved M-Y@N-term                     | -0.0047 | 1260.7013 | 421.2411 | 1260.7061 | 421.2426 | 3 | 28.03 |
| LIC10244 |       |      |                        |                                                                                                        |                                        |         |           |          |           |          |   |       |
|          | 2     | 4.0  | AFHSLSYNELK            | ITRAQ4plex@N-term;<br>ITRAQ4plex(K)@11                                                                 |                                        | -0.0730 | 1595.7821 | 798.8983 | 1595.8551 | 798.9348 | 2 | 48.57 |
|          | 2     | 4.0  | EGIETIQKELPISVFLE<br>R | ITRAQ4plex@N-term;<br>Deamidated(Q)@7;<br>ITRAQ4plex(K)@8                                              | cleaved F-E@N-term                     | -0.1121 | 2389.2227 | 797.4149 | 2389.3348 | 797.4522 | 3 | 59.85 |
|          | 2     | 4.0  | ELPISVFLER             | ITRAQ4plex@N-term                                                                                      |                                        | 0.0057  | 1345.7784 | 673.8965 | 1345.7727 | 673.8936 | 2 | 36.19 |
|          | 2     | 4.0  | IISGSYEGKELLDR         | ITRAQ4plex@N-term;<br>ITRAQ4plex(K)@9                                                                  | cleaved Y-I@N-term                     | 0.0384  | 1867.0679 | 623.3632 | 1867.0295 | 623.3504 | 3 | 41.74 |
|          | 2     | 4.0  | QVSLPDLAEALK           | Gln->pyro-Glu@N-term;<br>Oxidation(P)@5;<br>ITRAQ4plex(K)@12                                           |                                        | 0.0235  | 1425.8071 | 476.2763 | 1425.7837 | 476.2685 | 3 | 41.83 |
| LIC10237 |       |      |                        |                                                                                                        |                                        |         |           |          |           |          |   |       |
|          | 3.1   | 2.7  | ANFEGMYK               | ITRAQ4plex@N-term;<br>ITRAQ4plex(K)@8                                                                  |                                        | -0.0031 | 1182.6281 | 592.3213 | 1182.6311 | 592.3228 | 2 | 29.52 |
|          | 3.1   | 2.7  | DENLVLDLLTK            | ITRAQ4plex@N-term;<br>ITRAQ4plex(K)@11                                                                 |                                        | 0.9987  | 1560.9001 | 781.4573 | 1559.9014 | 780.9580 | 2 | 43.24 |
|          | 3.1   | 2.7  | FIIR                   | No ITRAQ4plex@N-term                                                                                   | cleaved F-F@N-term                     | 0.0461  | 547.3944  | 548.4017 | 547.3482  | 548.3555 | 1 | 52.52 |
|          | 3.1   | 2.7  | IADTLTLVEK             | ITRAQ4plex@N-term;<br>ITRAQ4plex(K)@11                                                                 |                                        | -0.0691 | 1502.8472 | 752.4308 | 1502.9163 | 752.4654 | 2 | 37.21 |
|          | 2.03  | 2.7  | LHVYR                  | Carbamyl@N-term                                                                                        |                                        | -0.0002 | 828.4605  | 415.2375 | 828.4606  | 415.2376 | 2 | 40.43 |
| LIC10235 |       |      |                        |                                                                                                        |                                        |         |           |          |           |          |   |       |
|          | 4     | 16.0 | ISNDDLESITGVK          | ITRAQ4plex@N-term;<br>ITRAQ4plex(K)@14                                                                 |                                        | -0.0140 | 1790.9729 | 896.4937 | 1790.9869 | 896.5007 | 2 | 34.95 |
|          | 4     | 16.0 | KISNDDLESITGVK         | ITRAQ4plex@N-term;<br>ITRAQ4plex(K)@1;<br>Deamidated(N)@4;<br>ITRAQ4plex(K)@15                         | missed K-I@1                           | 0.0410  | 2064.2090 | 689.0770 | 2064.1680 | 689.0633 | 3 | 35.23 |
|          | 4     | 16.0 | NNGLCIVCGNK            | No ITRAQ4plex@N-term;<br>Methylthio(C)@5;<br>Methylthio(C)@8;<br>ITRAQ4plex(K)@11                      |                                        | 0.0967  | 1369.7064 | 685.8605 | 1369.6097 | 685.8121 | 2 | 37.34 |
|          | 4     | 16.0 | VQLLYQK                | ITRAQ4plex@N-term;<br>Deamidated(Q)@2;<br>Oxidation(Y)@5;<br>ITRAQ4plex(K)@7                           |                                        | -0.0039 | 1195.7018 | 598.8582 | 1195.7056 | 598.8601 | 2 | 29.31 |
| LIC10232 |       |      |                        |                                                                                                        |                                        |         |           |          |           |          |   |       |
|          | 2.09  | 3.1  | ALPVENIHDLVGNK         | ITRAQ4plex@N-term;<br>ITRAQ4plex(K)@14                                                                 |                                        | 0.0004  | 1806.0247 | 603.0155 | 1806.0243 | 603.0154 | 3 | 32.60 |
|          | 2.09  | 3.1  | EEIARYNVENQVLIGK       | Glu->pyro-Glu@N-term;<br>Deamidated(R)@5;<br>Deamidated(N)@7;<br>Deamidated(N)@10;<br>ITRAQ4plex(K)@16 | missed R-Y@5                           | 0.0803  | 2003.1135 | 668.7118 | 2003.0333 | 668.6851 | 3 | 40.24 |
|          | 2.09  | 3.1  | IFLVTSR                | ITRAQ4plex@N-term                                                                                      | cleaved L-I@N-term                     | 0.0050  | 978.6035  | 490.3090 | 978.5984  | 490.3065 | 2 | 29.70 |
|          | 2.09  | 3.1  | TVGFFK                 | ITRAQ4plex@N-term;<br>ITRAQ4plex(K)@6                                                                  |                                        | 0.0196  | 985.6036  | 493.8091 | 985.5840  | 493.7993 | 2 | 40.39 |
|          | 2.09  | 3.1  | VAGLLSLK               | ITRAQ4plex@N-term;<br>ITRAQ4plex(K)@8                                                                  |                                        | -0.0020 | 1087.7189 | 544.8667 | 1087.7209 | 544.8677 | 2 | 32.69 |
| LIC10231 |       |      |                        |                                                                                                        |                                        |         |           |          |           |          |   |       |
|          | 2     | 4.5  | GILGISMTAIFS           | ITRAQ4plex@N-term;<br>Oxidation(F)@13                                                                  | cleaved L-G@N-term; cleaved F-L@C-term | -0.0935 | 1515.7195 | 758.8670 | 1515.8129 | 758.9137 | 2 | 31.44 |
|          | 2     | 4.5  | KPVETLEQIFPSGAR        | ITRAQ4plex@N-term;<br>ITRAQ4plex(K)@1                                                                  |                                        | 0.0022  | 1959.1055 | 654.0424 | 1959.1033 | 654.0417 | 3 | 34.44 |
|          | 2     | 4.5  | LVELFQTNGK             | ITRAQ4plex@N-term;<br>ITRAQ4plex(K)@10                                                                 |                                        | -0.0209 | 1435.8069 | 718.9107 | 1435.8278 | 718.9212 | 2 | 51.36 |
|          | 2     | 4.5  | VAVGK                  | No ITRAQ4plex@N-term;<br>ITRAQ4plex(K)@5                                                               | cleaved V-V@N-term                     | 0.0564  | 616.4594  | 617.4667 | 616.4030  | 617.4103 | 1 | 55.94 |

|          |       |      |                               |                                                                                                    |                                                    |         |           |           |           |           |   |       |
|----------|-------|------|-------------------------------|----------------------------------------------------------------------------------------------------|----------------------------------------------------|---------|-----------|-----------|-----------|-----------|---|-------|
|          | 2     | 4.5  | VIPMK                         | ITRAQ4plex@N-term;<br>Oxidation(M)@4;<br>ITRAQ4plex(K)@5                                           |                                                    | 0.0533  | 890.6036  | 446.3091  | 890.5503  | 446.2824  | 2 | 42.48 |
| NA       |       |      |                               |                                                                                                    |                                                    |         |           |           |           |           |   |       |
|          | 2.02  | 14.0 | EALNFAIGAAK                   | ITRAQ4plex@N-term;<br>Deamidated(N)@4;<br>ITRAQ4plex(K)@11                                         |                                                    | 0.0344  | 1392.8201 | 697.4173  | 1392.7856 | 697.4001  | 2 | 44.77 |
|          | 2.02  | 14.0 | EIKEALNFAIGAAK                | ITRAQ4plex@N-term;<br>ITRAQ4plex(K)@3;<br>ITRAQ4plex(K)@14                                         |                                                    | 0.0051  | 1906.1305 | 636.3841  | 1906.1253 | 636.3824  | 3 | 34.39 |
|          | 2.02  | 14.0 | EQADSILLK                     | ITRAQ4plex@N-term;<br>ITRAQ4plex(K)@9                                                              |                                                    | -2.9676 | 1300.7915 | 651.4030  | 1303.7591 | 652.8868  | 2 | 29.64 |
|          | 2.02  | 14.0 | YIEDALHSVEGVAGQ<br>VNSK       | ITRAQ4plex@N-term;<br>ITRAQ4plex(K)@19                                                             |                                                    | -0.0118 | 2303.1882 | 768.7367  | 2303.2001 | 768.7406  | 3 | 35.81 |
| LIC10225 |       |      |                               |                                                                                                    |                                                    |         |           |           |           |           |   |       |
|          | 2.07  | 3.6  | AELSNREEENIR                  | ITRAQ4plex@N-term                                                                                  | missed R-E@6                                       | -0.0004 | 1602.8079 | 535.2766  | 1602.8083 | 535.2767  | 3 | 27.37 |
|          | 2.07  | 3.6  | EEENIRMEDK                    | ITRAQ4plex@N-term;<br>ITRAQ4plex(K)@10                                                             | missed R-M@6                                       | 0.0660  | 1579.8416 | 790.9280  | 1579.7756 | 790.8951  | 2 | 39.56 |
|          | 2.07  | 3.6  | ELKVTNLGKISK                  | ITRAQ4plex@N-term;<br>ITRAQ4plex(K)@3;<br>Deamidated(N)@6;<br>ITRAQ4plex(K)@9;<br>ITRAQ4plex(K)@12 | missed K-V@3; missed K-I@9                         | -0.0548 | 1906.1401 | 636.3873  | 1906.1950 | 636.4056  | 3 | 34.84 |
|          | 2.07  | 3.6  | FNQALEEIGVDKR                 | ITRAQ4plex@N-term;<br>ITRAQ4plex(K)@12                                                             | missed K-R@12                                      | -0.0114 | 1805.9766 | 602.9995  | 1805.9879 | 603.0033  | 3 | 32.83 |
|          | 2.07  | 3.6  | LSASN                         | ITRAQ4plex@N-term                                                                                  | cleaved N-L@N-term; cleaved N-S@C-term             | 0.0364  | 634.3772  | 635.3845  | 634.3408  | 635.3481  | 1 | 54.37 |
|          | 2.07  | 3.6  | NLSKDKTLDLVSRCG<br>DGEEDALR   | ITRAQ4plex@N-term;<br>ITRAQ4plex(K)@4;<br>ITRAQ4plex(K)@6;<br>Methylthio(C)@14                     | cleaved M-N@N-term; missed K-T@6;<br>missed R-C@13 | -0.0027 | 3011.5354 | 1004.8520 | 3011.5381 | 1004.8533 | 3 | 52.79 |
|          | 2.07  | 3.6  | TGLSPEALK                     | ITRAQ4plex@N-term;<br>ITRAQ4plex(K)@9                                                              |                                                    | 0.1443  | 1202.8557 | 602.4351  | 1202.7114 | 602.3630  | 2 | 52.15 |
| LIC10215 |       |      |                               |                                                                                                    |                                                    |         |           |           |           |           |   |       |
|          | 6.01  | 14.3 | ARGRR                         | ITRAQ4plex@N-term                                                                                  | missed R-G@2; missed R-R@4                         | -0.0051 | 758.4694  | 759.4767  | 758.4745  | 759.4818  | 1 | 59.81 |
|          | 6.64  | 14.3 | EIQLISDSSDPIK                 | ITRAQ4plex@N-term;<br>Deamidated(Q)@3;<br>Oxidation(D)@7;<br>Oxidation(P)@11;<br>ITRAQ4plex(K)@13  |                                                    | 0.0520  | 1764.9757 | 883.4951  | 1764.9237 | 883.4691  | 2 | 3.43  |
|          | 6.64  | 14.3 | EIQLISDSSDPIKR                | ITRAQ4plex@N-term;<br>ITRAQ4plex(K)@13                                                             | missed K-R@13                                      | -0.0146 | 1888.0364 | 630.3527  | 1888.0509 | 630.3576  | 3 | 31.72 |
|          | 6.64  | 14.3 | ILDIADTHFLDGLPLPN             | ITRAQ4plex@N-term                                                                                  | cleaved N-F@C-term                                 | 0.0063  | 2120.1702 | 707.7307  | 2120.1639 | 707.7286  | 3 | 40.71 |
|          | 6.64  | 14.3 | ILDIADTHFLDGLPLPN<br>FVLR     | ITRAQ4plex@N-term                                                                                  |                                                    | 0.0043  | 2635.4902 | 879.5040  | 2635.4859 | 879.5026  | 3 | 40.47 |
|          | 6.64  | 14.3 | ILDTSVVIDGR                   | ITRAQ4plex@N-term                                                                                  |                                                    | 0.0160  | 1330.7738 | 666.3942  | 1330.7578 | 666.3862  | 2 | 32.74 |
|          | 6.64  | 14.3 | LDIADTHFLDGLPLPN<br>FVLR      | ITRAQ4plex@N-term                                                                                  | cleaved I-L@N-term                                 | -0.0844 | 2522.3176 | 841.7798  | 2522.4019 | 841.8079  | 3 | 50.97 |
|          | 6.01  | 14.3 | LSGVFAFK                      | ITRAQ4plex@N-term;<br>ITRAQ4plex(K)@8                                                              | cleaved I-L@N-term                                 | -0.0095 | 1079.6488 | 540.8317  | 1079.6583 | 540.8364  | 2 | 38.57 |
|          | 6.01  | 14.3 | MIFTK                         | ITRAQ4plex@N-term;<br>ITRAQ4plex(K)@5                                                              |                                                    | 0.0121  | 926.5624  | 464.2885  | 926.5503  | 464.2824  | 2 | 41.02 |
|          | 6.64  | 14.3 | VTVTSIIQTAAGK                 | ITRAQ4plex@N-term;<br>ITRAQ4plex(K)@13                                                             |                                                    | -0.0019 | 1575.9421 | 788.9783  | 1575.9439 | 788.9792  | 2 | 33.80 |
| LIC10214 |       |      |                               |                                                                                                    |                                                    |         |           |           |           |           |   |       |
|          | 2     | 12.2 | GVTQEEAGNLVSDVL<br>ASTLSPSEK  | ITRAQ4plex@N-term;<br>ITRAQ4plex(K)@24                                                             |                                                    | 0.0184  | 2718.4353 | 907.1523  | 2718.4167 | 907.1462  | 3 | 37.69 |
|          | 2     | 12.2 | MKVMIPVDK                     | ITRAQ4plex@N-term;<br>ITRAQ4plex(K)@2;<br>Oxidation(M)@4;<br>Oxidation(D)@8;<br>ITRAQ4plex(K)@9    | missed K-V@2                                       | 0.0573  | 1523.9354 | 762.9750  | 1523.8781 | 762.9463  | 2 | 52.75 |
|          | 2     | 12.2 | RASGK                         | No ITRAQ4plex@N-term;<br>ITRAQ4plex(K)@5                                                           | missed R-A@1                                       | -0.0007 | 661.3986  | 662.4059  | 661.3993  | 662.4066  | 1 | 55.90 |
| LIC10211 |       |      |                               |                                                                                                    |                                                    |         |           |           |           |           |   |       |
|          | 2     | 16.2 | SMGKPLPPEDDQDQ<br>YR          | ITRAQ4plex@N-term;<br>ITRAQ4plex(K)@4                                                              |                                                    | -0.0172 | 2105.0283 | 702.6833  | 2105.0455 | 702.6891  | 3 | 28.91 |
| LIC10208 |       |      |                               |                                                                                                    |                                                    |         |           |           |           |           |   |       |
|          | 8     | 9.6  | TLEWTPSPPTHENFE<br>K          | ITRAQ4plex@N-term;<br>ITRAQ4plex(K)@17                                                             |                                                    | -9.0210 | 2304.1675 | 769.0631  | 2313.1885 | 772.0701  | 3 | 55.36 |
| LIC10206 |       |      |                               |                                                                                                    |                                                    |         |           |           |           |           |   |       |
|          | 21.87 | 36.3 | EFESGPGVIADENYIR              | ITRAQ4plex@N-term                                                                                  |                                                    | 0.0020  | 1938.9465 | 970.4805  | 1938.9445 | 970.4795  | 2 | 32.17 |
|          | 21.87 | 36.3 | GDIEIHVTAR                    | ITRAQ4plex@N-term                                                                                  |                                                    | 0.0000  | 1253.6849 | 418.9023  | 1253.6850 | 418.9023  | 3 | 59.15 |
|          | 21.87 | 36.3 | GYPPAMPSYQGQLSD<br>DEINALEYIK | ITRAQ4plex@N-term;<br>ITRAQ4plex(K)@26                                                             |                                                    | 0.0064  | 3199.6057 | 1067.5420 | 3199.5991 | 1067.5403 | 3 | 38.32 |

|          |       |      |                           |                                                                                                    |                                   |         |           |           |           |           |   |       |
|----------|-------|------|---------------------------|----------------------------------------------------------------------------------------------------|-----------------------------------|---------|-----------|-----------|-----------|-----------|---|-------|
|          | 21.87 | 36.3 | IEYIK                     | ITRAQ4plex@N-term;<br>ITRAQ4plex(K)@5                                                              | cleaved L-I@N-term                | 0.0147  | 952.5984  | 477.3065  | 952.5837  | 477.2991  | 2 | 26.79 |
|          | 21.87 | 36.3 | IPPTELGK                  | ITRAQ4plex@N-term;<br>ITRAQ4plex(K)@8                                                              |                                   | -0.0149 | 1141.6802 | 571.8474  | 1141.6950 | 571.8548  | 2 | 28.12 |
|          | 21.87 | 36.3 | KSILOPTAQVVK              | ITRAQ4plex@N-term;<br>ITRAQ4plex(K)@1;<br>ITRAQ4plex(K)@12                                         | missed K-S@1                      | -0.0077 | 1743.0908 | 582.0375  | 1743.0984 | 582.0401  | 3 | 31.19 |
|          | 11.2  | 15.3 | LFSTR                     | ITRAQ4plex@N-term                                                                                  | cleaved G-L@N-term                | 0.0416  | 823.5090  | 412.7617  | 823.4674  | 412.7410  | 2 | 39.97 |
|          | 21.87 | 36.3 | LNTLFPNGIYVPVVK           | ITRAQ4plex@N-term;<br>Deamidated(N)@8;<br>ITRAQ4plex(K)@16                                         |                                   | 0.0016  | 2048.1565 | 1025.0860 | 2048.1550 | 1025.0848 | 2 | 35.22 |
|          | 11.2  | 15.3 | LVGPSYK                   | ITRAQ4plex@N-term;<br>ITRAQ4plex(K)@7                                                              |                                   | 0.0007  | 1050.6324 | 526.3235  | 1050.6317 | 526.3231  | 2 | 37.69 |
|          | 21.87 | 36.3 | LVMTSQDVLHSFYVP<br>AFR    | ITRAQ4plex@N-term                                                                                  |                                   | -0.0106 | 2253.1633 | 752.0617  | 2253.1738 | 752.0652  | 3 | 36.37 |
|          | 21.87 | 36.3 | PNGIYVPVVK                | No ITRAQ4plex@N-term;<br>Deamidated(N)@2;<br>ITRAQ4plex(K)@10                                      | cleaved Q-P@N-term                | 0.0096  | 1187.6768 | 594.8456  | 1187.6672 | 594.8409  | 2 | 35.37 |
|          | 11.2  | 15.3 | PPTELGK                   | No ITRAQ4plex@N-term;<br>ITRAQ4plex(K)@7                                                           | cleaved I-P@N-term                | -0.0113 | 884.4977  | 443.2561  | 884.5089  | 443.2617  | 2 | 40.84 |
|          | 21.87 | 36.3 | QPTAQVVK                  | Gln->pyro-Glu@N-term;<br>ITRAQ4plex(K)@8                                                           | cleaved L-Q@N-term                | -0.0137 | 996.5590  | 499.2867  | 996.5726  | 499.2936  | 2 | 35.65 |
|          | 21.87 | 36.3 | QWQWTFK                   | ITRAQ4plex@N-term;<br>ITRAQ4plex(K)@7                                                              |                                   | 0.0283  | 1310.7299 | 656.3722  | 1310.7015 | 656.3580  | 2 | 54.16 |
|          | 21.87 | 36.3 | SILQPTAQVVK               | ITRAQ4plex@N-term;<br>ITRAQ4plex(K)@11                                                             |                                   | -0.0339 | 1470.8674 | 736.4410  | 1470.9013 | 736.4580  | 2 | 29.11 |
|          | 21.87 | 36.3 | TSFMPVQASEVAK             | ITRAQ4plex@N-term;<br>ITRAQ4plex(K)@13                                                             | cleaved A-T@N-term                | -0.0121 | 1681.8833 | 841.9489  | 1681.8953 | 841.9549  | 2 | 30.32 |
|          | 21.87 | 36.3 | VDNETFDK                  | ITRAQ4plex@N-term;<br>ITRAQ4plex(K)@8                                                              | cleaved V-V@N-term                | 0.0004  | 1254.6340 | 628.3243  | 1254.6336 | 628.3241  | 2 | 27.47 |
|          | 21.87 | 36.3 | VGPSYK                    | ITRAQ4plex@N-term;<br>ITRAQ4plex(K)@6                                                              | cleaved L-V@N-term                | 0.0030  | 937.5507  | 469.7826  | 937.5477  | 469.7811  | 2 | 26.31 |
|          | 21.87 | 36.3 | VQASEVAK                  | ITRAQ4plex@N-term;<br>ITRAQ4plex(K)@8                                                              | cleaved P-V@N-term                | -0.1043 | 1118.5497 | 560.2821  | 1118.6539 | 560.3342  | 2 | 36.66 |
|          | 21.87 | 36.3 | VVDNETFDK                 | ITRAQ4plex@N-term;<br>ITRAQ4plex(K)@9                                                              |                                   | -0.0251 | 1353.6769 | 677.8457  | 1353.7020 | 677.8583  | 2 | 28.23 |
|          | 21.87 | 36.3 | WLNLLITATSFMPVQAS<br>EVAK | ITRAQ4plex@N-term;<br>Oxidation(W)@1;<br>Deamidated(N)@3;<br>Deamidated(Q)@14;<br>ITRAQ4plex(K)@20 | cleaved T-W@N-term                | -0.0542 | 2511.2632 | 838.0950  | 2511.3174 | 838.1131  | 3 | 57.89 |
|          | 21.87 | 36.3 | WYAEAGNVDSLK              | ITRAQ4plex@N-term;<br>ITRAQ4plex(K)@12                                                             |                                   | 0.0363  | 1639.8813 | 820.9479  | 1639.8450 | 820.9298  | 2 | 59.60 |
|          | 21.87 | 36.3 | YTLTLFTPTEK               | ITRAQ4plex@N-term;<br>ITRAQ4plex(K)@11                                                             |                                   | -0.0209 | 1588.8383 | 795.4264  | 1588.8592 | 795.4369  | 2 | 30.74 |
| LIC10191 |       |      |                           |                                                                                                    |                                   |         |           |           |           |           |   |       |
|          | 2     | 19.4 | EHSLNLPANIQAK             | ITRAQ4plex@N-term;<br>ITRAQ4plex(K)@13                                                             |                                   | -0.0071 | 1721.9597 | 574.9938  | 1721.9668 | 574.9962  | 3 | 30.53 |
|          | 2     | 19.4 | ILFFK                     | ITRAQ4plex@N-term;<br>ITRAQ4plex(K)@5                                                              | cleaved M-I@N-term                | 0.0128  | 954.6275  | 478.3210  | 954.6146  | 478.3146  | 2 | 47.80 |
| LIC10175 |       |      |                           |                                                                                                    |                                   |         |           |           |           |           |   |       |
|          | 43.52 | 57.9 | AANR                      | ITRAQ4plex@N-term                                                                                  | cleaved A-A@N-term                | -0.0063 | 574.3246  | 575.3318  | 574.3309  | 575.3382  | 1 | 37.85 |
|          | 34.51 | 48.7 | AAPEPSTQEQSAAAN<br>R      | ITRAQ4plex@N-term                                                                                  | cleaved S-A@N-term                | -0.0064 | 1770.8555 | 886.4350  | 1770.8618 | 886.4382  | 2 | 30.11 |
|          | 43.52 | 57.9 | ADVTPGDFSEWSK             | ITRAQ4plex@N-term;<br>ITRAQ4plex(K)@13                                                             |                                   | -0.0236 | 1725.8218 | 863.9182  | 1725.8453 | 863.9300  | 2 | 31.70 |
|          | 34.51 | 48.7 | APEPSTQEQSAAANR           | ITRAQ4plex@N-term                                                                                  | cleaved A-A@N-term                | -0.0059 | 1699.8188 | 850.9167  | 1699.8247 | 850.9196  | 2 | 30.65 |
|          | 34.51 | 48.7 | DGLTRPGFSYK               | ITRAQ4plex@N-term;<br>ITRAQ4plex(K)@11                                                             | cleaved P-D@N-term                | 0.0008  | 1527.8297 | 510.2838  | 1527.8289 | 510.2836  | 3 | 45.35 |
|          | 43.52 | 57.9 | DVTPGDFSEWSK              | ITRAQ4plex@N-term;<br>ITRAQ4plex(K)@12                                                             | cleaved A-D@N-term                | -0.0068 | 1654.8015 | 828.4080  | 1654.8082 | 828.4114  | 2 | 31.72 |
|          | 43.52 | 57.9 | EESAAPPEPSTQEQ            | ITRAQ4plex@N-term;<br>Dehydrated(E)@12                                                             | cleaved Q-S@C-term                | 0.0285  | 1527.7096 | 764.8621  | 1527.6811 | 764.8478  | 2 | 23.18 |
|          | 43.52 | 57.9 | EESAAPPEPSTQEQSA<br>AANR  | ITRAQ4plex@N-term                                                                                  |                                   | -0.0060 | 2115.9731 | 706.3317  | 2115.9791 | 706.3336  | 3 | 23.07 |
|          | 43.52 | 57.9 | EESAAPPEPSTQEQSA<br>AANRN | ITRAQ4plex@N-term;<br>Deamidated(N)@20                                                             | cleaved N-V@C-term; missed R-N@19 | -0.0158 | 2230.9902 | 744.6707  | 2231.0060 | 744.6759  | 3 | 24.55 |
|          | 43.52 | 57.9 | EPSTQEQSAAANR             | ITRAQ4plex@N-term                                                                                  | cleaved P-E@N-term                | -7.0193 | 1524.7156 | 763.3651  | 1531.7348 | 766.8747  | 2 | 24.95 |
|          | 43.52 | 57.9 | ESAAPEPSTQEQSAA<br>ANR    | ITRAQ4plex@N-term                                                                                  | cleaved E-E@N-term                | -0.0027 | 1986.9338 | 663.3185  | 1986.9365 | 663.3194  | 3 | 22.01 |
|          | 43.52 | 57.9 | GAGSSEPVSGDLAK            | ITRAQ4plex@N-term;<br>ITRAQ4plex(K)@14                                                             |                                   | -0.0177 | 1561.8014 | 781.9080  | 1561.8191 | 781.9168  | 2 | 27.31 |
|          | 43.52 | 57.9 | GNIFYSELR                 | ITRAQ4plex@N-term                                                                                  |                                   | -0.0295 | 1241.6232 | 621.8188  | 1241.6526 | 621.8336  | 2 | 31.15 |
|          | 34.51 | 48.7 | IFYSELR                   | ITRAQ4plex@N-term                                                                                  | cleaved N-I@N-term                | 0.0031  | 1070.5913 | 536.3029  | 1070.5882 | 536.3014  | 2 | 42.84 |

|       |      |                                               |                                                                                                    |                                                          |         |           |           |           |           |   |       |
|-------|------|-----------------------------------------------|----------------------------------------------------------------------------------------------------|----------------------------------------------------------|---------|-----------|-----------|-----------|-----------|---|-------|
| 43.52 | 57.9 | KADVTPGDFSEWSK                                | ITRAQ4plex@N-term;<br>ITRAQ4plex(K)@1;<br>ITRAQ4plex(K)@14                                         | missed K-A@1                                             | -0.0147 | 1998.0276 | 667.0165  | 1998.0424 | 667.0214  | 3 | 33.48 |
| 43.52 | 57.9 | KEESAAPE                                      | ITRAQ4plex@N-term;<br>ITRAQ4plex(K)@1;<br>Dehydrated(E)@8                                          | cleaved E-P@C-term                                       | 0.0053  | 1129.5912 | 565.8029  | 1129.5859 | 565.8002  | 2 | 23.84 |
| 43.52 | 57.9 | KEESAAPEPS                                    | ITRAQ4plex@N-term;<br>ITRAQ4plex(K)@1;<br>Dehydrated(S)@10                                         | cleaved S-T@C-term                                       | -0.0025 | 1313.6682 | 657.8414  | 1313.6707 | 657.8426  | 2 | 22.40 |
| 43.52 | 57.9 | KEESAAPEPST                                   | ITRAQ4plex@N-term;<br>ITRAQ4plex(K)@1;<br>Dehydrated(S)@10                                         | cleaved T-Q@C-term                                       | 0.0062  | 1414.7246 | 708.3696  | 1414.7184 | 708.3665  | 2 | 23.47 |
| 43.52 | 57.9 | KEESAAPEPSTQ                                  | ITRAQ4plex@N-term;<br>ITRAQ4plex(K)@1;<br>Dehydrated(T)@11                                         | cleaved Q-E@C-term                                       | -0.0006 | 1542.7764 | 772.3954  | 1542.7769 | 772.3957  | 2 | 23.06 |
| 43.52 | 57.9 | KEESAAPEPSTQE                                 | ITRAQ4plex@N-term;<br>ITRAQ4plex(K)@1;<br>Dehydrated(E)@13                                         | cleaved E-Q@C-term                                       | -0.0075 | 1671.8120 | 558.2780  | 1671.8195 | 558.2805  | 3 | 25.13 |
| 43.52 | 57.9 | KEESAAPEPSTQEIQ                               | ITRAQ4plex@N-term;<br>ITRAQ4plex(K)@1;<br>Dehydrated(E)@13                                         | cleaved Q-S@C-term                                       | -0.0279 | 1799.8502 | 600.9573  | 1799.8781 | 600.9666  | 3 | 22.24 |
| 43.52 | 57.9 | KEESAAPEPSTQEIQS                              | ITRAQ4plex@N-term;<br>ITRAQ4plex(K)@1;<br>Dehydrated(S)@15                                         | cleaved S-A@C-term                                       | 0.0082  | 1886.9183 | 629.9800  | 1886.9101 | 629.9773  | 3 | 22.13 |
| 43.52 | 57.9 | KEESAAPEPSTQEIQS<br>AA                        | ITRAQ4plex@N-term;<br>ITRAQ4plex(K)@1;<br>Dehydrated(S)@10                                         | cleaved A-A@C-term                                       | -0.0265 | 2028.9578 | 677.3265  | 2028.9844 | 677.3354  | 3 | 24.85 |
| 43.52 | 57.9 | KEESAAPEPSTQEIQS<br>AAAN                      | ITRAQ4plex@N-term;<br>ITRAQ4plex(K)@1                                                              | cleaved N-R@C-term                                       | 0.0014  | 2232.0764 | 745.0327  | 2232.0750 | 745.0323  | 3 | 23.35 |
| 43.52 | 57.9 | KEESAAPEPSTQEIQS<br>AAANR                     | ITRAQ4plex@N-term;<br>ITRAQ4plex(K)@1;<br>Cation:K(E)@6                                            |                                                          | -0.0174 | 2426.1147 | 607.5359  | 2426.1320 | 607.5403  | 4 | 21.78 |
| 43.52 | 57.9 | KEESAAPEPSTQEIQS<br>AAANRN                    | ITRAQ4plex@N-term;<br>ITRAQ4plex(K)@1;<br>Deamidated(Q)@12                                         | cleaved N-V@C-term; missed R-N@20                        | 0.0021  | 2503.2051 | 835.4090  | 2503.2030 | 835.4083  | 3 | 24.71 |
| 43.52 | 57.9 | KEESAAPEPSTQEIQS<br>AAANRNVVNSPEAI<br>ADSLNEK | ITRAQ4plex@N-term;<br>ITRAQ4plex(K)@1;<br>Oxidation(P)@7;<br>ITRAQ4plex(K)@37                      | missed R-N@20                                            | -0.4751 | 4343.6567 | 869.7386  | 4344.1319 | 869.8337  | 5 | 52.04 |
| 43.52 | 57.9 | KGNIFYSELR                                    | ITRAQ4plex@N-term;<br>ITRAQ4plex(K)@1                                                              | missed K-G@1                                             | -0.0107 | 1513.8389 | 505.6202  | 1513.8496 | 505.6238  | 3 | 46.29 |
| 43.52 | 57.9 | LEITGHTDAIGPEQAE<br>GAK                       | ITRAQ4plex@N-term;<br>ITRAQ4plex(K)@19                                                             | cleaved A-L@N-term                                       | -0.0112 | 2224.1467 | 742.3895  | 2224.1579 | 742.3932  | 3 | 30.84 |
| 34.51 | 48.7 | LLGAIASFSLCSSAEK<br>KEESAAPEPSTQEIQS<br>AAANR | ITRAQ4plex@N-term;<br>Methylthio(C)@12;<br>ITRAQ4plex(K)@17;<br>ITRAQ4plex(K)@18                   | cleaved I-L@N-term; missed K-K@17                        | -7.2011 | 4309.9609 | 1078.4980 | 4317.1623 | 1080.2978 | 4 | 31.83 |
| 43.52 | 57.9 | LPDSYALEITGHTDAIG<br>PEQAEQAK                 | ITRAQ4plex@N-term;<br>ITRAQ4plex(K)@25                                                             |                                                          | -0.0053 | 2870.4487 | 957.8235  | 2870.4542 | 957.8253  | 3 | 47.17 |
| 43.52 | 57.9 | NRRVTRFATSAPQQ                                | ITRAQ4plex@N-term;<br>Oxidation(R)@3;<br>Deamidated(R)@7;<br>Deamidated(Q)@14;<br>Deamidated(Q)@15 | missed R-R@2; missed R-V@3; missed R-F@7                 | 0.0025  | 1940.9851 | 648.0023  | 1940.9826 | 648.0015  | 3 | 35.75 |
| 43.52 | 57.9 | NVDVNSPEAIADSLNE<br>K                         | ITRAQ4plex@N-term;<br>ITRAQ4plex(K)@17                                                             |                                                          | -0.0508 | 2102.0227 | 1052.0190 | 2102.0735 | 1052.0440 | 2 | 31.46 |
| 43.52 | 57.9 | PEPSTQEIQSAAANR                               | No ITRAQ4plex@N-term                                                                               | cleaved A-P@N-term                                       | 0.0024  | 1484.6880 | 743.3513  | 1484.6855 | 743.3501  | 2 | 23.64 |
| 43.52 | 57.9 | PGFSYK                                        | ITRAQ4plex@N-term;<br>ITRAQ4plex(K)@6                                                              | cleaved R-P@N-term                                       | 0.0027  | 985.5504  | 493.7825  | 985.5477  | 493.7811  | 2 | 28.51 |
| 43.52 | 57.9 | PSTQEIQSAAANR                                 | No ITRAQ4plex@N-term                                                                               | cleaved E-P@N-term                                       | 0.0039  | 1258.5941 | 630.3043  | 1258.5902 | 630.3024  | 2 | 23.55 |
| 43.52 | 57.9 | PSTQEIQSAAANRNV<br>VNS                        | No ITRAQ4plex@N-term                                                                               | cleaved E-P@N-term; cleaved S-P@C-term;<br>missed R-N@12 | 0.0465  | 1886.9183 | 629.9800  | 1886.8718 | 629.9646  | 3 | 22.19 |
| 34.51 | 48.7 | PSTQEIQSAAANRNV<br>VNSPEAI                    | No ITRAQ4plex@N-term;<br>Oxidation(N)@17;<br>Oxidation(P)@19                                       | cleaved E-P@N-term; cleaved I-A@C-term;<br>missed R-N@12 | -0.0339 | 2329.0442 | 777.3553  | 2329.0782 | 777.3667  | 3 | 33.39 |
| 43.52 | 57.9 | QEQSAAANR                                     | No ITRAQ4plex@N-term                                                                               | cleaved T-Q@N-term                                       | -0.0032 | 973.4545  | 487.7345  | 973.4577  | 487.7361  | 2 | 23.95 |
| 43.52 | 57.9 | QGIPANRIVTK                                   | ITRAQ4plex@N-term;<br>ITRAQ4plex(K)@11                                                             | missed R-I@7                                             | 0.0321  | 1483.9401 | 742.9773  | 1483.9078 | 742.9612  | 2 | 35.96 |
| 43.52 | 57.9 | QSAAA                                         | Gln->pyro-Glu@N-term                                                                               | cleaved E-Q@N-term; cleaved A-N@C-term                   | 0.0358  | 429.2218  | 430.2290  | 429.1860  | 430.1932  | 1 | 25.71 |
| 34.51 | 48.7 | RFATSAPQQ                                     | ITRAQ4plex@N-term                                                                                  | cleaved F-R@N-term; missed R-F@1                         | 0.0088  | 1148.6149 | 575.3147  | 1148.6060 | 575.3103  | 2 | 33.00 |
| 34.51 | 48.7 | RYPDGLTRPGFSYK                                | No ITRAQ4plex@N-term;<br>Amino(Y)@2; Oxidation(P)@3;<br>ITRAQ4plex(K)@14                           | cleaved F-R@N-term; missed R-Y@1                         | 0.0042  | 1830.9541 | 611.3253  | 1830.9499 | 611.3239  | 3 | 42.76 |
| 43.52 | 57.9 | SAAPEPSTQEIQSAAA<br>NR                        | ITRAQ4plex@N-term                                                                                  | cleaved E-S@N-term                                       | -0.0107 | 1857.8832 | 929.9489  | 1857.8939 | 929.9542  | 2 | 20.87 |

|          |       |      |                                  |                                                                                    |                                                                          |         |           |          |           |          |   |       |
|----------|-------|------|----------------------------------|------------------------------------------------------------------------------------|--------------------------------------------------------------------------|---------|-----------|----------|-----------|----------|---|-------|
|          | 34.51 | 48.7 | SSAEKKEESAPEPS<br>TOEQSAAANR     | ITRAQ4plex@N-term;<br>ITRAQ4plex(K)@5;<br>ITRAQ4plex(K)@6                          | cleaved C-S@N-term; missed K-K@5                                         | -9.0555 | 3025.4614 | 757.3726 | 3034.5169 | 759.6365 | 4 | 32.65 |
|          | 43.52 | 57.9 | TNAPVIK                          | ITRAQ4plex@N-term;<br>ITRAQ4plex(K)@7                                              |                                                                          | 0.0022  | 1029.6448 | 515.8297 | 1029.6426 | 515.8286 | 2 | 25.27 |
|          | 43.52 | 57.9 | TOEQSAAANR                       | No ITRAQ4plex@N-term                                                               | cleaved S-T@N-term                                                       | 0.0020  | 1074.5074 | 538.2610 | 1074.5054 | 538.2600 | 2 | 23.74 |
|          | 43.52 | 57.9 | YPDGLTR                          | ITRAQ4plex@N-term                                                                  | cleaved R-P@C-term                                                       | 0.0033  | 964.5133  | 483.2639 | 964.5100  | 483.2623 | 2 | 28.79 |
|          | 43.52 | 57.9 | YPDGLTRPG                        | ITRAQ4plex@N-term                                                                  | cleaved G-F@C-term                                                       | -0.0004 | 1118.5839 | 560.2992 | 1118.5842 | 560.2994 | 2 | 28.10 |
|          | 43.52 | 57.9 | YPDGLTRPGFSY                     | ITRAQ4plex@N-term;<br>ITRAQ4plex(Y)@12                                             | cleaved Y-K@C-term                                                       | 0.0271  | 1659.8772 | 554.2997 | 1659.8500 | 554.2906 | 3 | 31.67 |
|          | 43.52 | 57.9 | YPDGLTRPGFSYK                    | ITRAQ4plex@N-term;<br>ITRAQ4plex(K)@13                                             |                                                                          | 0.0079  | 1787.9529 | 596.9916 | 1787.9450 | 596.9889 | 3 | 53.73 |
|          | 43.52 | 57.9 | YSELRANAVK                       | ITRAQ4plex@N-term;<br>Deamidated(N)@7;<br>ITRAQ4plex(K)@10                         | cleaved F-Y@N-term; missed R-A@5                                         | 0.0418  | 1438.8442 | 480.6220 | 1438.8024 | 480.6081 | 3 | 32.03 |
| LIC10132 |       |      |                                  |                                                                                    |                                                                          |         |           |          |           |          |   |       |
|          | 2     | 2.0  | AIEVVVGEVEAR                     | ITRAQ4plex@N-term                                                                  |                                                                          | -0.0021 | 1413.7928 | 707.9037 | 1413.7949 | 707.9047 | 2 | 32.84 |
|          | 2     | 2.0  | IDVRVIAATNADLEK                  | ITRAQ4plex@N-term;<br>Oxidation(D)@2; Oxidation(R)@4<br>ITRAQ4plex(K)@15           | missed R-V@4                                                             | -0.0372 | 1947.0509 | 650.0242 | 1947.0880 | 650.0366 | 3 | 45.35 |
|          | 2     | 2.0  | SDDIPLLNHIFIAK                   | ITRAQ4plex@N-term;<br>ITRAQ4plex(K)@14                                             |                                                                          | -0.0077 | 1883.0684 | 628.6967 | 1883.0760 | 628.6993 | 3 | 37.03 |
| LIC10125 |       |      |                                  |                                                                                    |                                                                          |         |           |          |           |          |   |       |
|          | 2.01  | 1.0  | ALISLK                           | ITRAQ4plex@N-term;<br>ITRAQ4plex(K)@6                                              | cleaved E-A@N-term                                                       | 0.0077  | 931.6387  | 466.8266 | 931.6310  | 466.8228 | 2 | 42.87 |
|          | 2.01  | 1.0  | ALSIDK                           | ITRAQ4plex@N-term;<br>ITRAQ4plex(K)@6                                              |                                                                          | -0.0126 | 933.5613  | 467.7879 | 933.5739  | 467.7942 | 2 | 37.33 |
|          | 2.01  | 1.0  | ILSGEYEAALK                      | ITRAQ4plex@N-term;<br>ITRAQ4plex(K)@11                                             |                                                                          | 0.0351  | 1480.8733 | 741.4439 | 1480.8381 | 741.4263 | 2 | 48.24 |
|          | 2.01  | 1.0  | IQTATPYK                         | No ITRAQ4plex@N-term;<br>Deamidated(Q)@2;<br>ITRAQ4plex(K)@8                       |                                                                          | -0.0037 | 1065.5791 | 533.7968 | 1065.5828 | 533.7987 | 2 | 48.26 |
|          | 2.01  | 1.0  | IVLFK                            | ITRAQ4plex@N-term;<br>ITRAQ4plex(K)@5                                              | cleaved G-I@N-term                                                       | 0.0003  | 906.6149  | 454.3147 | 906.6146  | 454.3146 | 2 | 43.71 |
|          | 2.01  | 1.0  | KLESQ                            | ITRAQ4plex@N-term;<br>ITRAQ4plex(K)@1;<br>Deamidated(Q)@6                          | cleaved G-K@N-term; cleaved Q-V@C-term; missed K-L@1                     | -0.0090 | 1005.5860 | 503.8003 | 1005.5950 | 503.8048 | 2 | 37.93 |
|          | 2.01  | 1.0  | LISLK                            | ITRAQ4plex@N-term;<br>ITRAQ4plex(K)@5                                              | cleaved A-L@N-term                                                       | 0.0197  | 860.6136  | 431.3141 | 860.5939  | 431.3042 | 2 | 41.65 |
| LIC10124 |       |      |                                  |                                                                                    |                                                                          |         |           |          |           |          |   |       |
|          | 4     | 6.2  | DVSGVWR                          | ITRAQ4plex@N-term;<br>Oxidation(W)@6                                               | cleaved L-D@N-term                                                       | 0.0694  | 977.5746  | 489.7946 | 977.5052  | 489.7599 | 2 | 26.62 |
|          | 4     | 6.2  | IGIASFR                          | ITRAQ4plex@N-term                                                                  |                                                                          | 0.0670  | 906.6078  | 907.6151 | 906.5409  | 907.5482 | 1 | 55.65 |
|          | 4     | 6.2  | ILSFPEALQVALDGLK                 | ITRAQ4plex@N-term;<br>ITRAQ4plex(K)@16                                             |                                                                          | 0.0003  | 2001.1758 | 668.0659 | 2001.1754 | 668.0657 | 3 | 41.37 |
|          | 4     | 6.2  | IQEMSWKNPSQLS<br>QELK            | No ITRAQ4plex@N-term;<br>ITRAQ4plex(K)@7;<br>Deamidated(Q)@11;<br>ITRAQ4plex(K)@17 | missed K-N@7                                                             | 0.0789  | 2334.2922 | 779.1047 | 2334.2133 | 779.0784 | 3 | 34.59 |
|          | 4     | 6.2  | SASSADTEVL                       | ITRAQ4plex@N-term                                                                  | cleaved F-S@N-term; cleaved L-F@C-term                                   | -0.0197 | 1122.5330 | 562.2737 | 1122.5526 | 562.2836 | 2 | 25.17 |
|          | 4     | 6.2  | SLKEEEAILGGSSDSD<br>YK           | ITRAQ4plex@N-term;<br>ITRAQ4plex(K)@3;<br>ITRAQ4plex(K)@18                         |                                                                          | 0.0122  | 2359.2241 | 787.4153 | 2359.2120 | 787.4113 | 3 | 33.17 |
|          | 4     | 6.2  | SSLVPIWEK                        | ITRAQ4plex@N-term;<br>ITRAQ4plex(K)@9                                              |                                                                          | -0.0453 | 1345.7396 | 673.8771 | 1345.7849 | 673.8997 | 2 | 33.99 |
|          | 4     | 6.2  | VLEDRLDVGWVRIS<br>LTRGENFSKRSPLR | No ITRAQ4plex@N-term;<br>ITRAQ4plex(K)@25;<br>Oxidation(P)@28                      | missed R-L@5; missed R-I@13; missed R-G@19; missed K-R@25; missed R-S@26 | -0.0612 | 3657.9575 | 610.6669 | 3658.0189 | 610.6771 | 6 | 47.61 |
|          | 4     | 6.2  | WVWNQKITDPVK                     | ITRAQ4plex@N-term;<br>ITRAQ4plex(K)@6; No<br>ITRAQ4plex(K)@12                      | missed K-I@6                                                             | -0.0364 | 1713.9658 | 857.9902 | 1714.0021 | 858.0083 | 2 | 58.54 |
| LIC10123 |       |      |                                  |                                                                                    |                                                                          |         |           |          |           |          |   |       |
|          | 2.22  | 3.6  | EADRNNADEITK                     | ITRAQ4plex@N-term;<br>ITRAQ4plex(K)@12                                             | missed R-N@4                                                             | -0.0213 | 1662.8203 | 555.2807 | 1662.8417 | 555.2878 | 3 | 26.58 |
|          | 2.22  | 3.6  | GESSEVILSKNR                     | No ITRAQ4plex@N-term;<br>ITRAQ4plex(K)@10;<br>Deamidated(N)@11                     | missed K-N@10                                                            | 0.0672  | 1462.8420 | 488.6213 | 1462.7749 | 488.5989 | 3 | 37.31 |
|          | 2.22  | 3.6  | IVWLLGDVK                        | ITRAQ4plex@N-term;<br>ITRAQ4plex(K)@9                                              |                                                                          | -0.0019 | 1329.8246 | 665.9196 | 1329.8264 | 665.9205 | 2 | 36.79 |
|          | 2.22  | 3.6  | NRELRIEKQK                       | ITRAQ4plex@N-term;<br>ITRAQ4plex(K)@8; No<br>ITRAQ4plex(K)@11                      | missed R-E@2; missed R-I@5; missed K-N@8                                 | 0.0591  | 1715.0637 | 572.6952 | 1715.0046 | 572.6755 | 3 | 31.35 |
| LIC10117 |       |      |                                  |                                                                                    |                                                                          |         |           |          |           |          |   |       |
|          | 6     | 7.5  | DSVSVDFQNRSLER                   | ITRAQ4plex@N-term;<br>Oxidation(N)@9                                               | cleaved I-D@N-term; missed R-S@10                                        | -0.0037 | 1810.8895 | 906.4520 | 1810.8931 | 906.4538 | 2 | 61.13 |

|          |       |      |                            |                                                                                  |                                  |         |           |           |           |           |   |       |
|----------|-------|------|----------------------------|----------------------------------------------------------------------------------|----------------------------------|---------|-----------|-----------|-----------|-----------|---|-------|
|          | 6     | 7.5  | FGIGGYQK                   | ITRAQ4plex@N-term;<br>Deamidated(Q)@7;<br>ITRAQ4plex(K)@8                        |                                  | 0.0347  | 1157.6672 | 579.8409  | 1157.6324 | 579.8235  | 2 | 38.35 |
|          | 6     | 7.5  | IFWESILEDPEYLTL<br>ILNR    | ITRAQ4plex@N-term                                                                |                                  | -1.0799 | 2650.3169 | 884.4462  | 2651.3969 | 884.8062  | 3 | 43.50 |
|          | 6     | 7.5  | KIDQLIEGILFR               | ITRAQ4plex@N-term;<br>ITRAQ4plex(K)@1                                            | missed K-I@1                     | -0.0161 | 1732.0331 | 578.3516  | 1732.0491 | 578.3570  | 3 | 43.48 |
|          | 6     | 7.5  | LPDGDLYIHLEK               | ITRAQ4plex@N-term;<br>ITRAQ4plex(K)@13                                           |                                  | -0.0102 | 1862.9919 | 622.0046  | 1863.0022 | 622.0080  | 3 | 34.08 |
|          | 6     | 7.5  | LQAELEFRAVR                | ITRAQ4plex@N-term                                                                | missed R-A@7                     | -0.0168 | 1345.7784 | 673.8965  | 1345.7952 | 673.9049  | 2 | 36.19 |
|          | 6     | 7.5  | SLFFRMPKSK                 | ITRAQ4plex@N-term;<br>Oxidation(M)@6;<br>ITRAQ4plex(K)@8;<br>ITRAQ4plex(K)@10    | missed R-M@5; missed K-S@8       | 0.0639  | 1688.0449 | 563.6889  | 1687.9809 | 563.6676  | 3 | 35.74 |
| LIC10115 |       |      |                            |                                                                                  |                                  |         |           |           |           |           |   |       |
|          | 8     | 13.1 | FVFSEIK                    | ITRAQ4plex@N-term;<br>Oxidation(F)@3;<br>ITRAQ4plex(K)@7                         | cleaved L-F@N-term               | -0.0253 | 1172.6432 | 587.3289  | 1172.6685 | 587.3415  | 2 | 48.18 |
|          | 8     | 13.1 | GLYGGK                     | ITRAQ4plex@N-term;<br>ITRAQ4plex(K)@6                                            | cleaved L-G@N-term               | 0.0480  | 881.5694  | 441.7920  | 881.5214  | 441.7680  | 2 | 39.29 |
|          | 8     | 13.1 | INSTPTLFINSKPLPK           | ITRAQ4plex@N-term;<br>Deamidated(N)@10;<br>ITRAQ4plex(K)@12;<br>ITRAQ4plex(K)@16 |                                  | 0.0193  | 2202.3181 | 735.1133  | 2202.2989 | 735.1069  | 3 | 49.05 |
|          | 8     | 13.1 | NGLNMNQFR                  | ITRAQ4plex@N-term;<br>Oxidation(N)@4;<br>Oxidation(M)@5;<br>Deamidated(N)@6      |                                  | -0.0062 | 1269.5831 | 635.7988  | 1269.5894 | 635.8020  | 2 | 40.03 |
|          | 8     | 13.1 | SISEQLK                    | ITRAQ4plex@N-term;<br>ITRAQ4plex(K)@7                                            |                                  | 0.0149  | 1091.6580 | 546.8362  | 1091.6430 | 546.8288  | 2 | 42.64 |
|          | 8     | 13.1 | SLSDK                      | ITRAQ4plex@N-term;<br>Oxidation(D)@4;<br>ITRAQ4plex(K)@5                         |                                  | 0.0205  | 852.5002  | 427.2574  | 852.4796  | 427.2471  | 2 | 35.11 |
|          | 8     | 13.1 | YGGK                       | No ITRAQ4plex@N-term;<br>ITRAQ4plex(K)@4                                         | cleaved L-Y@N-term               | 0.0376  | 567.3514  | 568.3587  | 567.3138  | 568.3211  | 1 | 59.50 |
| LIC10103 |       |      |                            |                                                                                  |                                  |         |           |           |           |           |   |       |
|          | 1.7   | 4.5  | FLLSLDLR                   | ITRAQ4plex@N-term                                                                |                                  | 0.0108  | 1220.7358 | 611.3752  | 1220.7251 | 611.3698  | 2 | 51.73 |
|          | 1.7   | 4.5  | GYRSPFGK                   | ITRAQ4plex@N-term;<br>Deamidated(R)@3;<br>ITRAQ4plex(K)@8                        | missed R-S@3                     | 0.0140  | 1199.6682 | 600.8414  | 1199.6542 | 600.8344  | 2 | 48.53 |
| LIC10095 |       |      |                            |                                                                                  |                                  |         |           |           |           |           |   |       |
|          | 13.7  | 28.0 | AESKKEEAAPASESS<br>TPAGEEQ | Formyl@N-term;<br>ITRAQ4plex(K)@4;<br>ITRAQ4plex(K)@5                            | missed K-K@4                     | -0.0098 | 2548.1924 | 850.4047  | 2548.2020 | 850.4079  | 3 | 25.78 |
|          | 15.28 | 28.0 | EEAAPASESSTPAGE<br>EQ      | ITRAQ4plex@N-term;<br>Dehydrated(E)@2;<br>ITRAQ4plex(S)@7; Methyl(E)@8           |                                  | -0.0147 | 1972.8959 | 987.4552  | 1972.9105 | 987.4625  | 2 | 31.99 |
|          | 13.7  | 28.0 | EETSETPSEQTESPK            | ITRAQ4plex@N-term;<br>ITRAQ4plex(K)@15                                           | cleaved A-E@N-term               | -0.0108 | 1965.9152 | 656.3123  | 1965.9258 | 656.3159  | 3 | 21.58 |
|          | 15.28 | 28.0 | ETSETPSEQTESPK             | ITRAQ4plex@N-term;<br>ITRAQ4plex(K)@14                                           | cleaved E-E@N-term               | -0.0152 | 1836.8680 | 919.4413  | 1836.8833 | 919.4489  | 2 | 31.21 |
|          | 15.28 | 28.0 | FFFRSLK                    | ITRAQ4plex@N-term;<br>Oxidation(P)@2; Oxidation(R)@4<br>ITRAQ4plex(K)@7          | cleaved S-F@N-term; missed R-S@4 | -0.0104 | 1213.6959 | 607.8552  | 1213.7063 | 607.8604  | 2 | 44.67 |
|          | 13.7  | 28.0 | ILIQLLIAAMALTGF            | ITRAQ4plex@N-term;<br>Deamidated(Q)@4                                            | cleaved F-S@C-term               | 0.0403  | 1732.0734 | 578.3651  | 1732.0331 | 578.3516  | 3 | 44.11 |
|          | 13.7  | 28.0 | KEEAAPASESST               | ITRAQ4plex@N-term;<br>ITRAQ4plex(K)@1;<br>Dehydrated(S)@11                       | cleaved T-P@C-term               | 0.0189  | 1475.7537 | 738.8841  | 1475.7347 | 738.8746  | 2 | 22.48 |
|          | 13.7  | 28.0 | KEEAAPASESSTPAGE<br>E      | ITRAQ4plex@N-term;<br>ITRAQ4plex(K)@1;<br>Dehydrated(E)@16                       | cleaved E-E@C-term               | -0.0023 | 1829.8865 | 915.9505  | 1829.8887 | 915.9516  | 2 | 22.79 |
|          | 13.7  | 28.0 | KEEAAPASESSTPAGE<br>EE     | ITRAQ4plex@N-term;<br>ITRAQ4plex(K)@1;<br>Dehydrated(E)@17                       | cleaved E-Q@C-term               | -0.0075 | 1958.9238 | 980.4692  | 1958.9313 | 980.4729  | 2 | 22.83 |
|          | 13.7  | 28.0 | KEEAAPASESSTPAGE<br>EEQ    | ITRAQ4plex@N-term;<br>ITRAQ4plex(K)@1                                            |                                  | -0.0070 | 2104.9932 | 1053.5040 | 2105.0004 | 1053.5075 | 2 | 24.43 |
|          | 13.7  | 28.0 | PSEQTESPK                  | ITRAQ4plex@N-term;<br>ITRAQ4plex(K)@9                                            | cleaved T-P@N-term               | -0.0008 | 1289.6699 | 645.8422  | 1289.6707 | 645.8426  | 2 | 22.75 |
|          | 15.28 | 28.0 | SALVAEETSETPSEQ<br>ESPK    | ITRAQ4plex@N-term;<br>ITRAQ4plex(K)@20                                           | cleaved F-S@N-term               | 2.9373  | 2410.1218 | 804.3812  | 2407.1846 | 803.4021  | 3 | 31.42 |
|          | 15.28 | 28.0 | SETPSEQTESPK               | No ITRAQ4plex@N-term;<br>ITRAQ4plex(K)@12                                        | cleaved T-S@N-term               | -0.0022 | 1462.6887 | 732.3516  | 1462.6909 | 732.3527  | 2 | 30.84 |
|          | 13.7  | 28.0 | TSETPSEQTESPK              | ITRAQ4plex@N-term;<br>ITRAQ4plex(K)@13                                           | cleaved E-T@N-term               | -0.0018 | 1707.8389 | 854.9267  | 1707.8407 | 854.9276  | 2 | 23.20 |



|          |      |      |                        |                                                              |                                                         |         |           |          |           |          |   |       |
|----------|------|------|------------------------|--------------------------------------------------------------|---------------------------------------------------------|---------|-----------|----------|-----------|----------|---|-------|
| LIC10076 |      |      |                        |                                                              |                                                         |         |           |          |           |          |   |       |
|          | 1.52 | 11.7 | NANSTEEK               | ITRAQ4plex@N-term;<br>ITRAQ4plex(K)@8                        |                                                         | 0.0386  | 1179.6361 | 590.8253 | 1179.5975 | 590.8060 | 2 | 26.25 |
|          | 1.52 | 11.7 | RDPSQPQELGR            | ITRAQ4plex@N-term                                            | missed R-D@1                                            | -0.0066 | 1425.7380 | 476.2533 | 1425.7446 | 476.2555 | 3 | 25.99 |
|          | 1.52 | 11.7 | RDPSQPQELGRDK          | ITRAQ4plex@N-term;<br>ITRAQ4plex(K)@13                       | missed R-D@1; missed R-D@11                             | -0.0150 | 1812.9536 | 605.3251 | 1812.9686 | 605.3301 | 3 | 30.69 |
|          | 2.09 | 12.8 | RRDPSQPQELGR           | Carbamyl@N-term                                              | missed R-R@1; missed R-D@2                              | -0.0052 | 1480.7443 | 494.5887 | 1480.7495 | 494.5904 | 3 | 34.60 |
| LIC10064 |      |      |                        |                                                              |                                                         |         |           |          |           |          |   |       |
|          | 5.1  | 15.6 | DAQVDVHK               | ITRAQ4plex@N-term;<br>ITRAQ4plex(K)@8                        |                                                         | -0.0185 | 1198.6365 | 400.5528 | 1198.6550 | 400.5589 | 3 | 26.27 |
|          | 9.53 | 23.7 | EKDAQVDVHK             | Carbamyl@N-term;<br>ITRAQ4plex(K)@2;<br>ITRAQ4plex(K)@10     |                                                         | -0.0044 | 1498.7939 | 500.6053 | 1498.7983 | 500.6067 | 3 | 35.56 |
|          | 5.1  | 15.6 | EPTYPADSK              | ITRAQ4plex@N-term;<br>ITRAQ4plex(K)@9                        |                                                         | 0.0032  | 1294.6681 | 648.3413 | 1294.6649 | 648.3397 | 2 | 25.86 |
|          | 9.53 | 23.7 | IDVHNKDESLR            | Carbamyl@N-term;<br>ITRAQ4plex(K)@6                          |                                                         | -0.0107 | 1511.7708 | 504.9308 | 1511.7814 | 504.9344 | 3 | 38.15 |
|          | 5.1  | 15.6 | IVWLK                  | ITRAQ4plex@N-term;<br>ITRAQ4plex(K)@5                        |                                                         | 0.0142  | 945.6397  | 473.8271 | 945.6255  | 473.8200 | 2 | 52.94 |
|          | 9.53 | 23.7 | LTLRNADTLDLK           | ITRAQ4plex@N-term;<br>Deamidated(N)@5;<br>ITRAQ4plex(K)@12   | missed R-N@4                                            | -0.0050 | 1660.9553 | 554.6591 | 1660.9603 | 554.6607 | 3 | 45.04 |
|          | 9.53 | 23.7 | NADTLDLK               | Carbamyl@N-term;<br>ITRAQ4plex(K)@8                          |                                                         | 0.0123  | 1075.5754 | 538.7950 | 1075.5631 | 538.7888 | 2 | 40.58 |
|          | 9.53 | 23.7 | PTYPADSK               | No ITRAQ4plex@N-term;<br>ITRAQ4plex(K)@8                     | cleaved E-P@N-term                                      | -0.0082 | 1021.5121 | 511.7633 | 1021.5202 | 511.7674 | 2 | 34.57 |
|          | 5.1  | 15.6 | VGFMIMGK               | ITRAQ4plex@N-term;<br>ITRAQ4plex(K)@8                        |                                                         | 0.0030  | 1169.6575 | 585.8360 | 1169.6544 | 585.8345 | 2 | 33.11 |
|          | 5.1  | 15.6 | VYDPK                  | ITRAQ4plex@N-term;<br>ITRAQ4plex(K)@5                        |                                                         | 0.0071  | 908.5283  | 455.2714 | 908.5211  | 455.2678 | 2 | 26.58 |
| LIC10060 |      |      |                        |                                                              |                                                         |         |           |          |           |          |   |       |
|          | 7.52 | 5.6  | AVIFVVLVLF             | ITRAQ4plex@N-term;<br>Oxidation(F)@10                        | cleaved F-A@N-term; cleaved F-P@C-term                  | -0.0010 | 1278.8064 | 640.4105 | 1278.8073 | 640.4109 | 2 | 39.41 |
|          | 2.91 | 1.3  | DAFVNTNK               | ITRAQ4plex@N-term;<br>Deamidated(N)@5; No<br>ITRAQ4plex(K)@8 |                                                         | 0.0717  | 1052.5978 | 527.3062 | 1052.5260 | 527.2703 | 2 | 44.16 |
|          | 7.52 | 5.6  | DLAEEVAK               | ITRAQ4plex@N-term;<br>Oxidation(D)@1;<br>ITRAQ4plex(K)@8     | cleaved F-D@N-term                                      | 0.0426  | 1177.6860 | 589.8503 | 1177.6434 | 589.8290 | 2 | 31.97 |
|          | 7.52 | 5.6  | EFVHPTSVK              | Glu->pyro-Glu@N-term;<br>ITRAQ4plex(H)@4;<br>ITRAQ4plex(K)@9 |                                                         | -0.0397 | 1312.6986 | 657.3566 | 1312.7383 | 657.3764 | 2 | 42.91 |
|          | 7.52 | 5.6  | ENLSNLVNLSDIYR         | ITRAQ4plex@N-term;<br>Deamidated(N)@8                        | cleaved P-E@N-term                                      | 0.0041  | 1793.9323 | 598.9847 | 1793.9281 | 598.9833 | 3 | 30.25 |
|          | 7.52 | 5.6  | EQALQASLKLNDIQP        | ITRAQ4plex@N-term;<br>ITRAQ4plex(K)@9;<br>Oxidation(N)@11    | cleaved Y-E@N-term; cleaved P-E@C-term;<br>missed K-L@9 | 0.0365  | 1971.1245 | 658.0488 | 1971.0880 | 658.0366 | 3 | 50.77 |
|          | 7.52 | 5.6  | EVLNNYLK               | ITRAQ4plex@N-term;<br>Deamidated(N)@5;<br>ITRAQ4plex(K)@8    | cleaved I-E@N-term                                      | 0.0207  | 1280.7428 | 641.3787 | 1280.7220 | 641.3683 | 2 | 35.30 |
|          | 7.52 | 5.6  | FKPAETR                | ITRAQ4plex@N-term;<br>ITRAQ4plex(K)@2;<br>ITRAQ4plex(T)@6    | cleaved Y-F@N-term                                      | -0.0095 | 1279.7520 | 427.5912 | 1279.7614 | 427.5944 | 3 | 27.73 |
|          | 7.52 | 5.6  | GDVLILGSDGRDDIDL<br>TP | ITRAQ4plex@N-term                                            | cleaved P-E@C-term; missed R-D@11                       | -0.0024 | 2014.0316 | 672.3511 | 2014.0340 | 672.3520 | 3 | 58.12 |
|          | 7.52 | 5.6  | GGDR                   | No ITRAQ4plex@N-term                                         | cleaved T-G@N-term                                      | 0.0147  | 403.1963  | 404.2035 | 403.1815  | 404.1888 | 1 | 46.96 |
|          | 7.52 | 5.6  | GKGNLEIESEIR           | ITRAQ4plex@N-term;<br>ITRAQ4plex(K)@2                        | missed K-G@2                                            | 0.0257  | 1746.9613 | 583.3277 | 1746.9356 | 583.3191 | 3 | 31.81 |
|          | 7.52 | 5.6  | IEVALNPDIYEDAK         | ITRAQ4plex@N-term;<br>Oxidation(D)@13;<br>ITRAQ4plex(K)@15   |                                                         | 0.0424  | 2006.1240 | 669.7153 | 2006.0816 | 669.7011 | 3 | 38.70 |
|          | 7.52 | 5.6  | IILDESPEYFAGHK         | ITRAQ4plex@N-term;<br>ITRAQ4plex(K)@14                       |                                                         | 0.0010  | 1906.0090 | 636.3436 | 1906.0080 | 636.3433 | 3 | 32.97 |
|          | 2.91 | 1.3  | LLGLLSFK               | ITRAQ4plex@N-term;<br>ITRAQ4plex(K)@8                        |                                                         | 0.0232  | 1177.7911 | 589.9028 | 1177.7678 | 589.8912 | 2 | 51.33 |
|          | 7.52 | 5.6  | LNLLSGVEK              | ITRAQ4plex@N-term;<br>Oxidation(N)@3;<br>ITRAQ4plex(K)@10    | cleaved P-L@N-term                                      | 0.0349  | 1389.8420 | 695.9283 | 1389.8071 | 695.9108 | 2 | 42.50 |
|          | 2.91 | 1.3  | LSLLK                  | ITRAQ4plex@N-term;<br>ITRAQ4plex(K)@5                        | cleaved D-L@N-term                                      | 0.0197  | 860.6136  | 431.3141 | 860.5939  | 431.3042 | 2 | 41.65 |
|          | 7.52 | 5.6  | LVNVEK                 | ITRAQ4plex@N-term;<br>ITRAQ4plex(K)@6                        | cleaved F-L@N-term                                      | 0.0018  | 988.6179  | 495.3162 | 988.6161  | 495.3153 | 2 | 28.56 |
|          | 7.52 | 5.6  | RELQDYAENLEEK          | ITRAQ4plex@N-term;<br>ITRAQ4plex(K)@13                       | missed R-E@1                                            | 0.0103  | 1923.9884 | 642.3367 | 1923.9782 | 642.3333 | 3 | 32.65 |
|          | 2.91 | 1.3  | SAANNR                 | ITRAQ4plex@N-term;<br>ITRAQ4plex(S)@1;<br>Oxidation(R)@6     |                                                         | 0.0127  | 935.5155  | 468.7650 | 935.5028  | 468.7587 | 2 | 46.53 |

|          |       |      |                        |                                                                               |                                                         |         |           |          |           |          |   |       |
|----------|-------|------|------------------------|-------------------------------------------------------------------------------|---------------------------------------------------------|---------|-----------|----------|-----------|----------|---|-------|
|          | 7.52  | 5.6  | VDLQNTLYEEIASLKE<br>DR | ITRAQ4plex@N-term;<br>ITRAQ4plex(K)@16                                        |                                                         | -0.0053 | 2536.3574 | 846.4598 | 2536.3628 | 846.4615 | 3 | 37.53 |
|          | 7.52  | 5.6  | YEQAQLQASLK            | ITRAQ4plex@N-term;<br>ITRAQ4plex(K)@10                                        |                                                         | -0.0318 | 1437.7754 | 719.8950 | 1437.8071 | 719.9108 | 2 | 30.15 |
|          | 2.91  | 1.3  | YFSYFKAETR             | ITRAQ4plex@N-term;<br>ITRAQ4plex(K)@6                                         |                                                         | 0.0281  | 1695.9146 | 566.3121 | 1695.8864 | 566.3028 | 3 | 45.82 |
| LIC10055 |       |      |                        |                                                                               |                                                         |         |           |          |           |          |   |       |
|          | 2     | 5.1  | FITGDIHPGAK            | ITRAQ4plex@N-term;<br>ITRAQ4plex(K)@12                                        |                                                         | 0.0140  | 1555.9106 | 519.6442 | 1555.8966 | 519.6395 | 3 | 45.63 |
|          | 2     | 5.1  | SNDNLEEILDEFIHGG<br>G  | ITRAQ4plex@N-term;<br>Deamidated(N)@4;<br>Oxidation(H)@14                     | cleaved G-I@C-term                                      | -0.0159 | 2018.9031 | 673.9750 | 2018.9191 | 673.9803 | 3 | 35.05 |
| LIC10046 |       |      |                        |                                                                               |                                                         |         |           |          |           |          |   |       |
|          | 16.53 | 18.5 | AGASLVSR               | ITRAQ4plex@N-term                                                             |                                                         | -0.0449 | 903.4811  | 904.4883 | 903.5260  | 904.5332 | 1 | 41.50 |
|          | 12.8  | 16.7 | APLLITK                | ITRAQ4plex@N-term;<br>ITRAQ4plex(K)@7                                         |                                                         | 0.0057  | 1042.7052 | 522.3599 | 1042.6994 | 522.3570 | 2 | 41.64 |
|          | 16.53 | 18.5 | AVLLAASHLAR            | ITRAQ4plex@N-term                                                             |                                                         | -0.0439 | 1264.7299 | 633.3722 | 1264.7737 | 633.3941 | 2 | 51.55 |
|          | 16.53 | 18.5 | EQVHSLGAK              | ITRAQ4plex@N-term;<br>ITRAQ4plex(K)@9                                         |                                                         | 0.0017  | 1255.7146 | 419.5788 | 1255.7128 | 419.5782 | 3 | 26.11 |
|          | 16.53 | 18.5 | FADPTTLGK              | Formyl@N-term;<br>ITRAQ4plex(K)@9                                             | cleaved H-F@N-term                                      | 0.0012  | 1120.5898 | 561.3022 | 1120.5886 | 561.3016 | 2 | 37.12 |
|          | 12.8  | 16.7 | GVTVIGHK               | ITRAQ4plex@N-term;<br>ITRAQ4plex(K)@8                                         |                                                         | 0.0006  | 1097.6807 | 549.8476 | 1097.6801 | 549.8473 | 2 | 37.87 |
|          | 16.53 | 18.5 | HGQNVVTPK              | Delta:H(2)C(2)@N-term;<br>ITRAQ4plex(K)@9                                     |                                                         | 0.0020  | 1148.6444 | 575.3295 | 1148.6424 | 575.3285 | 2 | 25.68 |
|          | 16.53 | 18.5 | IGATVLVEK              | ITRAQ4plex@N-term;<br>ITRAQ4plex(K)@9                                         |                                                         | -0.0172 | 1216.7463 | 609.3804 | 1216.7635 | 609.3890 | 2 | 36.51 |
|          | 16.53 | 18.5 | IVDALK                 | ITRAQ4plex@N-term;<br>ITRAQ4plex(K)@6                                         | cleaved D-I@N-term                                      | 0.0295  | 945.6397  | 473.8271 | 945.6103  | 473.8124 | 2 | 52.94 |
|          | 16.53 | 18.5 | KAPLLITK               | ITRAQ4plex@N-term;<br>ITRAQ4plex(K)@1;<br>ITRAQ4plex(K)@8                     | missed K-A@1                                            | -0.0492 | 1314.8473 | 439.2897 | 1314.8964 | 439.3061 | 3 | 32.15 |
|          | 16.53 | 18.5 | KIGATVLVEK             | ITRAQ4plex@N-term;<br>ITRAQ4plex(K)@1;<br>ITRAQ4plex(K)@10                    | missed K-I@1                                            | -0.1119 | 1488.8486 | 497.2902 | 1488.9605 | 497.3274 | 3 | 49.44 |
|          | 16.53 | 18.5 | KVEVLSLDAIAR           | ITRAQ4plex@N-term;<br>ITRAQ4plex(K)@1                                         | missed K-V@1                                            | -0.0234 | 1600.9523 | 534.6580 | 1600.9756 | 534.6658 | 3 | 33.28 |
|          | 12.8  | 16.7 | LDAIAR                 | No ITRAQ4plex@N-term                                                          | cleaved S-L@N-term                                      | -0.0186 | 657.3624  | 658.3696 | 657.3810  | 658.3883 | 1 | 44.33 |
|          | 16.53 | 18.5 | LGAVVDVFDTRPEVK        | ITRAQ4plex@N-term;<br>ITRAQ4plex(K)@15                                        |                                                         | -0.0055 | 1932.0869 | 645.0363 | 1932.0924 | 645.0381 | 3 | 34.20 |
|          | 12.8  | 16.7 | LTLDALGSK              | ITRAQ4plex@N-term;<br>ITRAQ4plex(K)@9                                         |                                                         | 0.0020  | 1204.7291 | 603.3718 | 1204.7271 | 603.3708 | 2 | 43.27 |
|          | 12.8  | 16.7 | MNIGILK                | ITRAQ4plex@N-term;<br>ITRAQ4plex(K)@7                                         |                                                         | 0.0020  | 1075.6688 | 538.8417 | 1075.6667 | 538.8406 | 2 | 43.60 |
|          | 16.53 | 18.5 | NKSNLIVSIHF            | ITRAQ4plex@N-term;<br>Deamidated(N)@1;<br>ITRAQ4plex(K)@2;<br>Deamidated(N)@4 | cleaved I-N@N-term; cleaved F-A@C-term;<br>missed K-S@2 | 0.0485  | 1560.9241 | 781.4693 | 1560.8755 | 781.4450 | 2 | 48.80 |
|          | 16.53 | 18.5 | NLAGSIPADASK           | ITRAQ4plex@N-term;<br>ITRAQ4plex(K)@12                                        |                                                         | -0.0239 | 1430.7734 | 716.3940 | 1430.7973 | 716.4059 | 2 | 27.92 |
|          | 16.53 | 18.5 | NVLNFLK                | ITRAQ4plex@N-term;<br>ITRAQ4plex(K)@7                                         |                                                         | 0.0022  | 1134.7028 | 568.3586 | 1134.7005 | 568.3575 | 2 | 51.72 |
|          | 16.53 | 18.5 | SGAAK                  | No ITRAQ4plex@N-term;<br>ITRAQ4plex(K)@5                                      | cleaved K-P@C-term                                      | 0.0366  | 576.3719  | 577.3792 | 576.3353  | 577.3426 | 1 | 57.36 |
|          | 16.53 | 18.5 | VSRQDVINK              | ITRAQ4plex@N-term;<br>Deamidated(R)@3;<br>Deamidated(O)@4;<br>ITRAQ4plex(K)@9 | cleaved L-V@N-term; missed R-Q@3                        | 0.0427  | 1347.8030 | 674.9088 | 1347.7602 | 674.8874 | 2 | 31.92 |
|          | 16.53 | 18.5 | VSVTPDIVDALK           | ITRAQ4plex@N-term;<br>ITRAQ4plex(K)@12                                        |                                                         | -0.0076 | 1543.8989 | 772.9567 | 1543.9065 | 772.9605 | 2 | 33.28 |
|          | 16.53 | 18.5 | VSVTPDIVDALKK          | ITRAQ4plex@N-term;<br>ITRAQ4plex(K)@12;<br>ITRAQ4plex(K)@13                   | missed K-K@12                                           | -0.0053 | 1816.0983 | 606.3734 | 1816.1035 | 606.3751 | 3 | 33.34 |
| LIC10043 |       |      |                        |                                                                               |                                                         |         |           |          |           |          |   |       |
|          | 4.01  | 4.4  | EIVSGNFLMEIPEK         | ITRAQ4plex@N-term;<br>ITRAQ4plex(S)@4;<br>ITRAQ4plex(K)@14                    |                                                         | 0.0193  | 2037.1375 | 680.0531 | 2037.1182 | 680.0467 | 3 | 47.34 |
|          | 4.01  | 4.4  | ESIKDIVNLIDNTTK        | ITRAQ4plex@N-term;<br>ITRAQ4plex(K)@4;<br>ITRAQ4plex(K)@15                    |                                                         | -0.0170 | 2134.2041 | 712.4086 | 2134.2211 | 712.4143 | 3 | 40.83 |
|          | 4.01  | 4.4  | LDEIVK                 | ITRAQ4plex@N-term;<br>ITRAQ4plex(K)@6                                         | cleaved T-L@N-term                                      | 0.0458  | 1003.6616 | 502.8380 | 1003.6157 | 502.8151 | 2 | 32.90 |
|          | 4.01  | 4.4  | LNRYKEIR               | ITRAQ4plex@N-term;<br>ITRAQ4plex(K)@5                                         | cleaved I-L@N-term; missed R-K@4                        | 0.0633  | 1378.8922 | 460.6380 | 1378.8289 | 460.6169 | 3 | 34.39 |
|          | 4.01  | 4.4  | NTILNYRK               | ITRAQ4plex@N-term;<br>ITRAQ4plex(K)@8                                         | cleaved I-N@N-term; missed R-K@7                        | -0.0487 | 1308.7271 | 655.3708 | 1308.7758 | 655.3952 | 2 | 31.28 |

|          |      |      |                                  |                                                                                                    |                                                   |         |           |           |           |           |   |       |
|----------|------|------|----------------------------------|----------------------------------------------------------------------------------------------------|---------------------------------------------------|---------|-----------|-----------|-----------|-----------|---|-------|
|          | 4.01 | 4.4  | TFEKAILAMNEIK                    | ITRAQ4plex@N-term;<br>ITRAQ4plex(K)@4;<br>ITRAQ4plex(K)@13                                         | missed K-A@4                                      | 0.0201  | 1939.1379 | 647.3866  | 1939.1178 | 647.3799  | 3 | 38.19 |
|          | 4.01 | 4.4  | TNLLSLNASIESAR                   | No ITRAQ4plex@N-term;<br>Oxidation(N)@7                                                            |                                                   | 0.0885  | 1503.8778 | 752.9462  | 1503.7893 | 752.9019  | 2 | 50.74 |
|          | 4.01 | 4.4  | VNESIQNVSK                       | ITRAQ4plex@N-term;<br>ITRAQ4plex(K)@10                                                             |                                                   | -0.0057 | 1404.7759 | 703.3952  | 1404.7816 | 703.3981  | 2 | 27.55 |
| LIC10037 |      |      |                                  |                                                                                                    |                                                   |         |           |           |           |           |   |       |
|          | 4.01 | 5.0  | AQVIHDGPTK                       | ITRAQ4plex@N-term;<br>ITRAQ4plex(K)@10                                                             |                                                   | 0.0031  | 1352.7687 | 451.9302  | 1352.7656 | 451.9291  | 3 | 26.32 |
|          | 4.01 | 5.0  | ELIFPFTDMETPVLD<br>R             | ITRAQ4plex@N-term                                                                                  |                                                   | -0.0057 | 2165.1143 | 1083.5640 | 2165.1200 | 1083.5673 | 2 | 40.18 |
|          | 4.01 | 5.0  | FDWVLEK                          | ITRAQ4plex@N-term;<br>ITRAQ4plex(K)@7                                                              |                                                   | 0.0104  | 1223.6898 | 612.8522  | 1223.6794 | 612.8470  | 2 | 34.09 |
|          | 4.01 | 5.0  | IITPK                            | ITRAQ4plex@N-term;<br>ITRAQ4plex(K)@5                                                              |                                                   | 0.0278  | 858.6060  | 859.6133  | 858.5782  | 859.5855  | 1 | 55.95 |
|          | 4.01 | 5.0  | KMLAEVQAAAGAK                    | ITRAQ4plex@N-term;<br>ITRAQ4plex(K)@1;<br>ITRAQ4plex(K)@13                                         | cleaved L-K@N-term; missed K-M@1                  | 0.0146  | 1719.0225 | 574.0148  | 1719.0078 | 574.0099  | 3 | 31.56 |
|          | 4.01 | 5.0  | NMLRGLK                          | ITRAQ4plex@N-term;<br>Oxidation(R)@4;<br>ITRAQ4plex(K)@7                                           | missed R-G@4                                      | 0.0230  | 1134.7018 | 568.3582  | 1134.6787 | 568.3466  | 2 | 33.67 |
| LIC10027 |      |      |                                  |                                                                                                    |                                                   |         |           |           |           |           |   |       |
|          | 4.13 | 7.3  | GETTENPAPRAAR                    | ITRAQ4plex@N-term;<br>Oxidation(R)@10; Cation:K@C-<br>term                                         | missed R-A@10                                     | 0.0520  | 1566.7794 | 523.2671  | 1566.7274 | 523.2498  | 3 | 25.07 |
|          | 4.13 | 7.3  | ILGGGLLGLSMWFNV<br>W             | ITRAQ4plex@N-term                                                                                  | cleaved I-I@N-term; cleaved W-F@C-term            | -0.0207 | 1906.0090 | 636.3436  | 1906.0297 | 636.3505  | 3 | 32.97 |
|          | 4.13 | 7.3  | KATQQLVPR                        | ITRAQ4plex@N-term;<br>ITRAQ4plex(K)@1                                                              | missed K-A@1                                      | -0.0246 | 1327.7933 | 443.6051  | 1327.8180 | 443.6133  | 3 | 37.90 |
|          | 4.13 | 7.3  | PMLFLMGAAR                       | No ITRAQ4plex@N-term                                                                               | cleaved I-P@N-term                                | 0.0144  | 1105.5920 | 553.8033  | 1105.5776 | 553.7961  | 2 | 44.49 |
|          | 4.13 | 7.3  | TNLLSIPMLFLMGAA<br>R             | ITRAQ4plex@N-term                                                                                  |                                                   | -0.0034 | 1992.0989 | 665.0402  | 1992.1022 | 665.0413  | 3 | 50.52 |
|          | 2.8  | 7.3  | VLWWFR                           | ITRAQ4plex@N-term                                                                                  |                                                   | 0.0260  | 1049.6193 | 525.8169  | 1049.5933 | 525.8039  | 2 | 52.55 |
| LIC10002 |      |      |                                  |                                                                                                    |                                                   |         |           |           |           |           |   |       |
|          | 8.83 | 16.1 | AIHAVEGVITTR                     | ITRAQ4plex@N-term                                                                                  |                                                   | 0.0103  | 1409.8215 | 705.9180  | 1409.8112 | 705.9129  | 2 | 59.53 |
|          | 8.83 | 16.1 | EQVIPK                           | ITRAQ4plex@N-term;<br>ITRAQ4plex(K)@6                                                              | cleaved Y-E@N-term                                | -0.0531 | 1000.5630 | 501.2888  | 1000.6161 | 501.3153  | 2 | 32.03 |
|          | 8.83 | 16.1 | FIFNGLYMIPNGDK                   | No ITRAQ4plex@N-term;<br>Oxidation(F)@10;<br>ITRAQ4plex(K)@14                                      |                                                   | 0.0404  | 1787.9443 | 596.9887  | 1787.9038 | 596.9752  | 3 | 37.48 |
|          | 8.83 | 16.1 | FSTSISKEEFQVSLR                  | ITRAQ4plex@N-term;<br>Oxidation(F)@1;<br>ITRAQ4plex(K)@7;<br>Deamidated(Q)@11;<br>Deamidated(R)@15 |                                                   | 0.0203  | 2063.0869 | 688.7029  | 2063.0666 | 688.6962  | 3 | 31.32 |
|          | 8.83 | 16.1 | GEYLMDFR                         | ITRAQ4plex@N-term                                                                                  |                                                   | 0.0073  | 1286.6523 | 644.3334  | 1286.6451 | 644.3298  | 2 | 35.55 |
|          | 8.83 | 16.1 | IEFSDANSPVIFKDP<br>SDFEFISVIMPMK | ITRAQ4plex@N-term;<br>ITRAQ4plex(K)@13;<br>ITRAQ4plex(K)@28                                        |                                                   | -0.9247 | 3583.9265 | 896.9889  | 3584.8512 | 897.2201  | 4 | 37.65 |
|          | 8.83 | 16.1 | ISGMDADEIK                       | ITRAQ4plex@N-term;<br>ITRAQ4plex(K)@10                                                             |                                                   | 0.0100  | 1365.7155 | 683.8650  | 1365.7054 | 683.8600  | 2 | 29.00 |
|          | 8.83 | 16.1 | LTFSKNLNLFAQTLG<br>ASEASINK      | ITRAQ4plex@N-term;<br>ITRAQ4plex(K)@5;<br>Deamidated(N)@9;<br>ITRAQ4plex(K)@24                     | cleaved K-P@C-term; missed K-N@5                  | 0.0079  | 3013.6528 | 754.4205  | 3013.6450 | 754.4185  | 4 | 57.13 |
|          | 8.83 | 16.1 | PSRQVRLTSK                       | ITRAQ4plex@N-term;<br>Deamidated(R)@3;<br>Deamidated(Q)@4;<br>ITRAQ4plex(K)@11                     | cleaved E-P@N-term; missed R-Q@3;<br>missed R-L@6 | 0.0633  | 1607.9872 | 537.0030  | 1607.9239 | 536.9819  | 3 | 36.37 |
|          | 8.83 | 16.1 | QVLTAAEPPSRQVR                   | ITRAQ4plex@N-term;<br>Deamidated(Q)@1;<br>Oxidation(F)@9                                           | missed R-Q@11                                     | 0.0745  | 1743.9983 | 873.0064  | 1743.9237 | 872.9691  | 2 | 52.48 |
|          | 8.83 | 16.1 | TSYAIAHEDQR                      | ITRAQ4plex@N-term                                                                                  |                                                   | -0.0031 | 1433.6990 | 478.9070  | 1433.7021 | 478.9080  | 3 | 26.57 |
|          | 8.83 | 16.1 | VNTSEFLK                         | ITRAQ4plex@N-term;<br>ITRAQ4plex(K)@8                                                              |                                                   | -0.0006 | 1224.6952 | 613.3549  | 1224.6958 | 613.3552  | 2 | 30.56 |
| LIC12853 |      |      |                                  |                                                                                                    |                                                   |         |           |           |           |           |   |       |
|          | 2    | 2.6  | GWSTGTELEPAR                     | ITRAQ4plex@N-term                                                                                  |                                                   | -0.0019 | 1446.7206 | 724.3676  | 1446.7225 | 724.3685  | 2 | 29.14 |
|          | 2    | 2.6  | ITLPGAMF                         | ITRAQ4plex@N-term                                                                                  | cleaved F-L@C-term                                | -0.0069 | 992.5418  | 497.2782  | 992.5487  | 497.2816  | 2 | 29.94 |
|          | 2    | 2.6  | NVLILLIFI                        | ITRAQ4plex@N-term;<br>Deamidated(N)@1                                                              | cleaved L-N@N-term; cleaved I-L@C-term            | -0.0242 | 1314.8407 | 439.2875  | 1314.8648 | 439.2956  | 3 | 49.34 |
|          | 2    | 2.6  | PIIFASSLILF                      | ITRAQ4plex@N-term;<br>Oxidation(F)@11                                                              | cleaved M-P@N-term; cleaved F-P@C-term            | -0.0043 | 1378.8143 | 690.9144  | 1379.8186 | 690.9166  | 2 | 45.52 |
| LIC12856 |      |      |                                  |                                                                                                    |                                                   |         |           |           |           |           |   |       |
|          | 6.4  | 22.5 | FSFNALSVVDQR                     | ITRAQ4plex@N-term                                                                                  |                                                   | -0.0036 | 1582.8190 | 792.4167  | 1582.8225 | 792.4185  | 2 | 46.41 |
|          | 6.4  | 22.5 | GISLNLK                          | ITRAQ4plex@N-term;<br>ITRAQ4plex(K)@6                                                              |                                                   | -0.0065 | 918.5677  | 460.2911  | 918.5742  | 460.2944  | 2 | 37.12 |

|          |       |      |                                   |                                                                                                                                                |                                                           |         |           |           |           |           |   |       |
|----------|-------|------|-----------------------------------|------------------------------------------------------------------------------------------------------------------------------------------------|-----------------------------------------------------------|---------|-----------|-----------|-----------|-----------|---|-------|
|          | 6.4   | 22.5 | IGFGK                             | ITRAQ4plex@N-term;<br>ITRAQ4plex(K)@5                                                                                                          | cleaved G-I@N-term                                        | -0.0182 | 808.4869  | 405.2507  | 808.5051  | 405.2598  | 2 | 37.75 |
|          | 6.4   | 22.5 | LFGKD                             | ITRAQ4plex@N-term;<br>ITRAQ4plex(K)@4                                                                                                          |                                                           | 0.0049  | 866.5154  | 434.2650  | 866.5105  | 434.2625  | 2 | 39.91 |
|          | 6.4   | 22.5 | VILKPSSTAGTIIAGAS<br>VR           | ITRAQ4plex@N-term;<br>ITRAQ4plex(K)@4                                                                                                          |                                                           | -0.0191 | 2098.2527 | 700.4248  | 2098.2718 | 700.4312  | 3 | 54.04 |
| LIC11336 |       |      |                                   |                                                                                                                                                |                                                           |         |           |           |           |           |   |       |
|          | 8.29  | 42.7 | ASIKPLGDR                         | ITRAQ4plex@N-term;<br>ITRAQ4plex(K)@4                                                                                                          | cleaved M-A@N-term                                        | -0.0227 | 1243.7264 | 415.5828  | 1243.7492 | 415.5903  | 3 | 28.31 |
|          | 8.29  | 42.7 | ESDILAVVK                         | ITRAQ4plex@N-term;<br>ITRAQ4plex(K)@9                                                                                                          |                                                           | -1.9914 | 1258.7618 | 630.3882  | 1260.7533 | 631.3839  | 2 | 31.82 |
|          | 9.79  | 47.9 | EYLIIR                            | ITRAQ4plex@N-term                                                                                                                              |                                                           | -0.0015 | 949.5704  | 475.7925  | 949.5719  | 475.7932  | 2 | 41.87 |
|          | 9.79  | 47.9 | GSIFVPDTAK                        | No ITRAQ4plex@N-term;<br>ITRAQ4plex(K)@10                                                                                                      | cleaved I-G@N-term                                        | 0.0120  | 1177.6584 | 589.8365  | 1177.6465 | 589.8305  | 2 | 42.97 |
|          | 9.79  | 47.9 | GTEIK                             | No ITRAQ4plex@N-term;<br>ITRAQ4plex(K)@5                                                                                                       | cleaved S-G@N-term                                        | 0.0106  | 690.4139  | 691.4212  | 690.4034  | 691.4107  | 1 | 57.98 |
|          | 8.29  | 42.7 | IGSIFVPDTAK                       | ITRAQ4plex@N-term;<br>ITRAQ4plex(K)@11                                                                                                         |                                                           | 0.0049  | 1434.8375 | 718.4260  | 1434.8326 | 718.4236  | 2 | 31.61 |
|          | 8.29  | 42.7 | LIPLEVK                           | ITRAQ4plex@N-term;<br>ITRAQ4plex(K)@7                                                                                                          |                                                           | -0.0040 | 1098.7217 | 550.3681  | 1098.7256 | 550.3701  | 2 | 32.03 |
|          | 8.29  | 42.7 | RESDILAVVK                        | ITRAQ4plex@N-term;<br>Oxidation(D)@4;<br>ITRAQ4plex(K)@10                                                                                      | cleaved I-R@N-term; missed R-E@1                          | 0.0622  | 1432.9115 | 478.6444  | 1432.8493 | 478.6237  | 3 | 31.05 |
|          | 8.29  | 42.7 | VGDTVLYGK                         | ITRAQ4plex@N-term;<br>ITRAQ4plex(K)@9                                                                                                          |                                                           | -0.0391 | 1238.6724 | 620.3434  | 1238.7114 | 620.3630  | 2 | 28.89 |
|          | 8.29  | 42.7 | VLVEPRQEAEEK                      | ITRAQ4plex@N-term;<br>Cation:K(E)@4; Oxidation(P)@5;<br>ITRAQ4plex(K)@12                                                                       | missed R-Q@6                                              | 0.0492  | 1767.9504 | 590.3241  | 1767.9013 | 590.3077  | 3 | 29.17 |
|          | 9.79  | 47.9 | VVEIGSGK                          | ITRAQ4plex@N-term;<br>ITRAQ4plex(K)@8                                                                                                          |                                                           | -0.0089 | 1075.6393 | 538.8269  | 1075.6481 | 538.8313  | 2 | 36.86 |
|          | 8.29  | 42.7 | YSGTEIK                           | ITRAQ4plex@N-term;<br>ITRAQ4plex(K)@7                                                                                                          |                                                           | -0.0144 | 1084.5864 | 543.3005  | 1084.6008 | 543.3077  | 2 | 27.56 |
| LIC11335 |       |      |                                   |                                                                                                                                                |                                                           |         |           |           |           |           |   |       |
|          | 69.71 | 63.0 | AAVEEGIVPGGTLTL<br>K              | ITRAQ4plex@N-term;<br>ITRAQ4plex(K)@17                                                                                                         |                                                           | -0.0406 | 1911.0879 | 956.5512  | 1911.1284 | 956.5715  | 2 | 33.57 |
|          | 69.71 | 63.0 | AKDIEYNATAR                       | ITRAQ4plex@N-term;<br>ITRAQ4plex(K)@2                                                                                                          | cleaved M-A@N-term                                        | -0.0328 | 1596.8024 | 533.2747  | 1596.8351 | 533.2856  | 3 | 27.52 |
|          | 69.71 | 63.0 | AQEA VGS LK                       | ITRAQ4plex@N-term;<br>ITRAQ4plex(K)@9                                                                                                          |                                                           | -0.0109 | 1189.6801 | 595.8473  | 1189.6910 | 595.8528  | 2 | 27.29 |
|          | 69.71 | 63.0 | AVTAAVESIQK                       | ITRAQ4plex@N-term;<br>ITRAQ4plex(K)@11                                                                                                         |                                                           | -0.0564 | 1403.7664 | 702.8904  | 1403.8228 | 702.9187  | 2 | 29.07 |
|          | 69.71 | 63.0 | DGVITVEEAK                        | ITRAQ4plex@N-term;<br>ITRAQ4plex(K)@10                                                                                                         |                                                           | -0.0201 | 1347.7289 | 674.8717  | 1347.7489 | 674.8817  | 2 | 28.24 |
|          | 69.71 | 63.0 | DIANVASISANNDNTIG<br>NLIADAMDK    | ITRAQ4plex@N-term;<br>ITRAQ4plex(K)@26                                                                                                         |                                                           | -0.0173 | 2947.4629 | 983.4949  | 2947.4800 | 983.5006  | 3 | 38.14 |
|          | 69.71 | 63.0 | DIEYNATAR                         | ITRAQ4plex@N-term                                                                                                                              |                                                           | -0.0013 | 1253.5997 | 627.8071  | 1253.6010 | 627.8078  | 2 | 25.71 |
|          | 69.71 | 63.0 | DLIH                              | ITRAQ4plex@N-term                                                                                                                              | cleaved H-I@C-term                                        | -0.0038 | 640.3628  | 641.3701  | 640.3666  | 641.3739  | 1 | 56.98 |
|          | 69.71 | 63.0 | DLIHLEK                           | ITRAQ4plex@N-term;<br>ITRAQ4plex(K)@8                                                                                                          |                                                           | -0.0252 | 1267.7491 | 423.5903  | 1267.7744 | 423.5987  | 3 | 33.52 |
|          | 69.71 | 63.0 | EDTTSEYDREK                       | ITRAQ4plex@N-term;<br>ITRAQ4plex(K)@11                                                                                                         | cleaved I-E@N-term; missed R-E@9                          | -0.0190 | 1659.7640 | 554.2620  | 1659.7831 | 554.2683  | 3 | 26.31 |
|          | 69.71 | 63.0 | EIELEDPLENMG AQM<br>VK            | ITRAQ4plex@N-term;<br>ITRAQ4plex(K)@17                                                                                                         |                                                           | -0.0488 | 2233.0725 | 745.3648  | 2233.1214 | 745.3811  | 3 | 34.93 |
|          | 69.71 | 63.0 | EIQGRIGQIKQIEDTT<br>SEYDREK       | ITRAQ4plex@N-term;<br>ITRAQ4plex(K)@10;<br>ITRAQ4plex(K)@11;<br>ITRAQ4plex(K)@12;<br>Deamidated(Q)@15;<br>Oxidation(D)@15;<br>ITRAQ4plex(K)@24 | missed R-I@5; missed K-K@10; missed K-Q@11; missed R-E@22 | -0.0115 | 3456.8433 | 865.2181  | 3456.8547 | 865.2210  | 4 | 45.65 |
|          | 69.71 | 63.0 | ENTTLQMLGR                        | ITRAQ4plex@N-term                                                                                                                              | cleaved L-E@N-term                                        | -0.0445 | 1305.6388 | 653.8267  | 1305.6833 | 653.8489  | 2 | 29.69 |
|          | 69.71 | 63.0 | FGAPTITK                          | ITRAQ4plex@N-term;<br>ITRAQ4plex(K)@8                                                                                                          |                                                           | -0.0085 | 1121.6604 | 561.8375  | 1121.6688 | 561.8417  | 2 | 28.64 |
|          | 45.86 | 44.0 | FGAPTITKDGVTVAK                   | ITRAQ4plex@N-term;<br>ITRAQ4plex(K)@8;<br>ITRAQ4plex(K)@15                                                                                     |                                                           | -0.0045 | 1936.1313 | 646.3844  | 1936.1359 | 646.3859  | 3 | 41.42 |
|          | 69.71 | 63.0 | GNEGFNALT MVWED<br>MIQAGV V DPAK  | ITRAQ4plex@N-term;<br>ITRAQ4plex(K)@25                                                                                                         |                                                           | -0.0254 | 2979.4460 | 994.1559  | 2979.4714 | 994.1644  | 3 | 49.47 |
|          | 69.71 | 63.0 | GYISPYM V TDAESMV<br>ATLNDPFLIYDK | ITRAQ4plex@N-term;<br>ITRAQ4plex(K)@28                                                                                                         |                                                           | -0.0275 | 3453.7056 | 1152.2420 | 3453.7332 | 1152.2517 | 3 | 46.34 |
|          | 69.71 | 63.0 | IEDTTSEYDREK                      | ITRAQ4plex@N-term;<br>ITRAQ4plex(K)@12                                                                                                         | cleaved Q-I@N-term; missed R-E@10                         | 0.0018  | 1772.8690 | 591.9636  | 1772.8672 | 591.9630  | 3 | 27.88 |
|          | 45.86 | 44.0 | IGQIK                             | ITRAQ4plex@N-term;<br>ITRAQ4plex(K)@5                                                                                                          |                                                           | -0.0087 | 845.5491  | 423.7818  | 845.5578  | 423.7862  | 2 | 36.63 |
|          | 45.86 | 44.0 | IIFRALEEPIR                       | No ITRAQ4plex@N-term                                                                                                                           | missed R-A@4                                              | 0.0391  | 1355.8315 | 452.9511  | 1355.7925 | 452.9381  | 3 | 43.92 |
|          | 69.71 | 63.0 | ISSMK                             | ITRAQ4plex@N-term;<br>ITRAQ4plex(K)@5                                                                                                          |                                                           | 0.0086  | 852.5069  | 427.2607  | 852.4983  | 427.2564  | 2 | 26.68 |

|       |      |                                 |                                                                                               |                                   |         |           |          |           |          |   |       |
|-------|------|---------------------------------|-----------------------------------------------------------------------------------------------|-----------------------------------|---------|-----------|----------|-----------|----------|---|-------|
| 69.71 | 63.0 | KDJANVASISANNDNTI<br>GNLIADAMDK | ITRAQ4plex@N-term;<br>ITRAQ4plex(K)@1;<br>ITRAQ4plex(K)@27                                    |                                   | -0.0101 | 3219.6670 | 805.9240 | 3219.6771 | 805.9265 | 4 | 39.72 |
| 69.71 | 63.0 | KDIEYNETAR                      | ITRAQ4plex@N-term;<br>ITRAQ4plex(K)@1                                                         | cleaved A-K@N-term                | -0.0387 | 1525.7593 | 509.5937 | 1525.7980 | 509.6066 | 3 | 28.14 |
| 69.71 | 63.0 | KEIELEDPLENMGQAQ<br>MVK         | ITRAQ4plex@N-term;<br>ITRAQ4plex(K)@1;<br>ITRAQ4plex(K)@18                                    | cleaved A-K@N-term                | -0.0111 | 2505.3074 | 627.3341 | 2505.3184 | 627.3369 | 4 | 34.74 |
| 69.71 | 63.0 | KGNEGFALTMVVE<br>DMIQAGVVDPAK   | ITRAQ4plex@N-term;<br>ITRAQ4plex(K)@1;<br>Oxidation(M)@11;<br>ITRAQ4plex(K)@26                | missed K-G@1                      | -0.0361 | 3267.6272 | 817.9141 | 3267.6633 | 817.9231 | 4 | 50.56 |
| 69.71 | 63.0 | KQIEDTTSEYDR                    | ITRAQ4plex@N-term;<br>ITRAQ4plex(K)@1                                                         | missed K-Q@1                      | -0.0120 | 1771.8711 | 591.6310 | 1771.8832 | 591.6350 | 3 | 28.24 |
| 69.71 | 63.0 | KTISCVAVK                       | ITRAQ4plex@N-term;<br>ITRAQ4plex(K)@1;<br>Methylthio(C)@5;<br>ITRAQ4plex(K)@9                 | missed K-T@1                      | -0.0214 | 1425.8199 | 476.2806 | 1425.8413 | 476.2877 | 3 | 50.49 |
| 69.71 | 63.0 | LAGGVAVIHVGAATEV<br>EMK         | ITRAQ4plex@N-term;<br>ITRAQ4plex(K)@19                                                        |                                   | -1.0485 | 2138.1479 | 713.7233 | 2139.1965 | 714.0728 | 3 | 7.11  |
| 69.71 | 63.0 | LDGDEATGAK                      | ITRAQ4plex@N-term;<br>ITRAQ4plex(K)@10                                                        |                                   | 0.0211  | 1263.6761 | 632.8453 | 1263.6550 | 632.8348 | 2 | 24.23 |
| 69.71 | 63.0 | LEGVNKLNAVK                     | ITRAQ4plex@N-term;<br>Oxidation(N)@5;<br>ITRAQ4plex(K)@6;<br>ITRAQ4plex(K)@12                 | cleaved L-L@N-term; missed K-L@6  | -0.0733 | 1702.9574 | 852.4860 | 1703.0307 | 852.5226 | 2 | 50.28 |
| 69.71 | 63.0 | LENTTLQMLGR                     | No ITRAQ4plex@N-term;<br>Oxidation(M)@8                                                       |                                   | -0.0006 | 1290.6597 | 646.3371 | 1290.6602 | 646.3374 | 2 | 30.72 |
| 45.86 | 44.0 | LIHILEK                         | ITRAQ4plex@N-term;<br>ITRAQ4plex(K)@7                                                         | cleaved D-L@N-term                | -0.0259 | 1152.7216 | 577.3680 | 1152.7474 | 577.3810 | 2 | 52.64 |
| 45.86 | 44.0 | LLEGVNK                         | ITRAQ4plex@N-term;<br>ITRAQ4plex(K)@7                                                         |                                   | -0.0135 | 1059.6398 | 530.8271 | 1059.6532 | 530.8339 | 2 | 39.25 |
| 69.71 | 63.0 | LLEGVNKLNAVK                    | ITRAQ4plex@N-term;<br>ITRAQ4plex(K)@7;<br>Deamidated(N)@10;<br>ITRAQ4plex(K)@13               | missed K-L@7                      | -0.0718 | 1801.0321 | 601.3513 | 1801.1039 | 601.3752 | 3 | 52.70 |
| 45.86 | 44.0 | MAKDIEYNETAR                    | Protein Terminal Acetyl@N-term;<br>No ITRAQ4plex(K)@3;<br>Dehydrated(D)@4;<br>Deamidated(N)@8 |                                   | 0.0766  | 1464.7321 | 733.3733 | 1464.6555 | 733.3350 | 2 | 35.65 |
| 69.71 | 63.0 | MITSNAGLEGSVIVEH<br>AK          | ITRAQ4plex@N-term;<br>ITRAQ4plex(K)@18                                                        |                                   | -0.0025 | 2143.1526 | 715.3915 | 2143.1551 | 715.3923 | 3 | 58.88 |
| 69.71 | 63.0 | MVTDAESMVATLNDP<br>FILIYDK      | ITRAQ4plex@N-term;<br>ITRAQ4plex(K)@22                                                        | cleaved Y-M@N-term                | -0.0105 | 2773.4058 | 925.4758 | 2773.4162 | 925.4793 | 3 | 40.03 |
| 69.71 | 63.0 | MVTDAESMVATLNDP<br>FILIYDKK     | ITRAQ4plex@N-term;<br>ITRAQ4plex(K)@22;<br>ITRAQ4plex(K)@23                                   | cleaved Y-M@N-term; missed K-K@22 | 0.0010  | 3045.6143 | 762.4108 | 3045.6132 | 762.4106 | 4 | 41.42 |
| 69.71 | 63.0 | NVTAGANPMSLK                    | ITRAQ4plex@N-term;<br>Oxidation(M)@9;<br>ITRAQ4plex(K)@12                                     |                                   | 0.0087  | 1505.8203 | 753.9174 | 1505.8115 | 753.9130 | 2 | 26.92 |
| 69.71 | 63.0 | NVTAGANPMSLKK                   | ITRAQ4plex@N-term;<br>Oxidation(M)@9;<br>ITRAQ4plex(K)@12;<br>ITRAQ4plex(K)@13                | missed K-K@12                     | -0.0013 | 1778.0073 | 593.6764 | 1778.0086 | 593.6768 | 3 | 27.77 |
| 45.86 | 44.0 | NVVIDKK                         | No ITRAQ4plex@N-term;<br>ITRAQ4plex(K)@6;<br>ITRAQ4plex(K)@7                                  | missed K-K@6                      | 0.0073  | 1102.7028 | 552.3586 | 1102.6954 | 552.3550 | 2 | 36.70 |
| 69.71 | 63.0 | PGGGLTLK                        | No ITRAQ4plex@N-term;<br>ITRAQ4plex(K)@9                                                      | cleaved V-P@N-term                | 0.0040  | 998.6287  | 500.3216 | 998.6246  | 500.3196 | 2 | 34.12 |
| 69.71 | 63.0 | QIEDTTSEYDR                     | ITRAQ4plex@N-term;<br>ITRAQ4plex(Y)@9                                                         |                                   | -0.0130 | 1643.7753 | 548.9324 | 1643.7882 | 548.9367 | 3 | 26.77 |
| 69.71 | 63.0 | QIEDTTSEYDREK                   | ITRAQ4plex@N-term;<br>ITRAQ4plex(K)@13                                                        | missed R-E@11                     | -0.0677 | 1900.8582 | 634.6266 | 1900.9258 | 634.6492 | 3 | 27.40 |
| 45.86 | 44.0 | RALEEPIR                        | ITRAQ4plex@N-term                                                                             | cleaved F-R@N-term; missed R-A@1  | -0.0032 | 1126.6549 | 564.3347 | 1126.6580 | 564.3363 | 2 | 39.41 |
| 69.71 | 63.0 | SALQNAASIGSM                    | ITRAQ4plex@N-term                                                                             | cleaved M-I@C-term                | 0.0024  | 1292.6541 | 647.3343 | 1292.6516 | 647.3331 | 2 | 40.26 |
| 69.71 | 63.0 | SIETTLVDVEGMQFDR                | ITRAQ4plex@N-term                                                                             |                                   | 0.0102  | 1982.9844 | 992.4995 | 1982.9741 | 992.4943 | 2 | 52.48 |
| 69.71 | 63.0 | SMLEDIAITGGQVISE<br>DLGMK       | ITRAQ4plex@N-term;<br>ITRAQ4plex(K)@22                                                        |                                   | -0.0103 | 2607.3640 | 870.1286 | 2607.3743 | 870.1320 | 3 | 48.63 |
| 45.86 | 44.0 | TISCVAVK                        | ITRAQ4plex@N-term;<br>Methylthio(C)@4;<br>ITRAQ4plex(K)@8                                     |                                   | -0.0107 | 1153.6335 | 577.8240 | 1153.6443 | 577.8294 | 2 | 41.54 |
| 69.71 | 63.0 | TNDVAGDGTTTATILA<br>QSIINEGLK   | ITRAQ4plex@N-term;<br>ITRAQ4plex(K)@25                                                        |                                   | -0.0143 | 2790.4712 | 931.1643 | 2790.4855 | 931.1691 | 3 | 37.17 |
| 69.71 | 63.0 | VEDALSATR                       | ITRAQ4plex@N-term                                                                             |                                   | 0.0073  | 1104.5969 | 553.3057 | 1104.5897 | 553.3021 | 2 | 27.82 |

|          |       |      |                 |                                                                                |                            |         |           |          |           |          |      |       |
|----------|-------|------|-----------------|--------------------------------------------------------------------------------|----------------------------|---------|-----------|----------|-----------|----------|------|-------|
|          | 45.86 | 44.0 | VGKDGVTVEEAK    | ITRAQ4plex@N-term;<br>ITRAQ4plex(K)@3;<br>ITRAQ4plex(K)@13                     |                            | -0.0076 | 1776.0282 | 593.0167 | 1776.0358 | 593.0192 | 3    | 42.99 |
|          | 69.71 | 63.0 | VTVDKENTIIIEGK  | ITRAQ4plex@N-term;<br>ITRAQ4plex(K)@5;<br>ITRAQ4plex(K)@14                     |                            | -0.0929 | 1978.0383 | 660.3534 | 1978.1312 | 660.3843 | 3    | 30.02 |
| LIC13219 | 69.71 | 63.0 | YNETAR          | ITRAQ4plex@N-term                                                              | cleaved E-Y@N-term         | 0.0515  | 896.4989  | 449.2567 | 896.4474  | 449.2310 | 2    | 24.35 |
|          | 2.23  | 1.6  | EVGLDAILK       | ITRAQ4plex@N-term;<br>ITRAQ4plex(K)@9                                          |                            | -0.0125 | 1244.7460 | 623.3802 | 1244.7584 | 623.3865 | 2    | 45.75 |
|          | 2.23  | 1.6  | IHTDIHFINAK     | ITRAQ4plex@N-term;<br>ITRAQ4plex(K)@11                                         |                            | -0.1316 | 1595.7711 | 798.8928 | 1595.9027 | 798.9586 | 2    | 47.05 |
|          | 2.23  | 1.6  | IKNEMPEEQSVLR   | ITRAQ4plex@N-term;<br>ITRAQ4plex(K)@2                                          | missed K-N@2               | -0.0134 | 1859.9884 | 621.0034 | 1860.0019 | 621.0079 | 3    | 30.57 |
|          | 2.23  | 1.6  | IRKSIR          | No ITRAQ4plex@N-term;<br>ITRAQ4plex(K)@3                                       | missed R-K@2; missed K-S@3 | 0.0560  | 915.6660  | 458.8403 | 915.6100  | 458.8123 | 2    | 54.69 |
|          | 2.23  | 1.6  | LPVIR           | No ITRAQ4plex@N-term                                                           | cleaved T-L@N-term         | 0.0779  | 596.4789  | 597.4862 | 596.4010  | 597.4083 | 1    | 53.77 |
| LIC10157 |       |      |                 |                                                                                |                            |         |           |          |           |          |      |       |
|          | 6.01  | 6.7  | DFTGPNGELIQVAR  | ITRAQ4plex@N-term;<br>Deamidated(N)@6                                          |                            | -0.0130 | 1660.8413 | 831.4279 | 1660.8542 | 831.4344 | 2    | 31.86 |
|          | 6.01  | 6.7  | TDKESGVDFAGTGSR | ITRAQ4plex@N-term;<br>ITRAQ4plex(K)@3                                          |                            | 0.0057  | 1813.9106 | 605.6442 | 1813.9050 | 605.6423 | 3    | 27.96 |
|          | 6.01  | 6.7  | TKESNSADPVVQK   | ITRAQ4plex@N-term;<br>ITRAQ4plex(K)@2;<br>Deamidated(N)@5;<br>ITRAQ4plex(K)@13 |                            | -0.0151 | 1834.9850 | 612.6689 | 1835.0002 | 612.6740 | 3    | 26.89 |
|          | 6.01  | 6.7  | DFTGPNGELIQVAR  | ITRAQ4plex@N-term;<br>Deamidated(N)@6                                          |                            | 0.0051  | 1660.8594 | 831.4370 | 1660.8542 | 831.4344 | 2    | 31.96 |
|          | 6.01  | 6.7  | TKESNSADPVVQK   | ITRAQ4plex@N-term;<br>ITRAQ4plex(K)@2;<br>Deamidated(N)@5;<br>ITRAQ4plex(K)@13 |                            | -0.0134 | 1834.9867 | 612.6695 | 1835.0002 | 612.6740 | 3    | 27.00 |
| LIC10161 |       |      |                 |                                                                                |                            |         |           |          |           |          |      |       |
|          | 2     | 10.2 | HTLVALNGR       | No ITRAQ4plex@N-term;<br>Deamidated(N)@7                                       |                            | -0.0032 | 980.5372  | 491.2758 | 980.5403  | 491.2774 | 2    | 39.32 |
|          | 2     | 10.2 | HTLVALNGR       | No ITRAQ4plex@N-term;<br>Deamidated(N)@7                                       |                            | 0.0022  | 980.5425  | 491.2785 | 980.5403  | 491.2774 | 2    | 39.21 |
|          | 4     | 13.6 | DIGHSDEVEAK     | ITRAQ4plex@N-term;<br>ITRAQ4plex(K)@11                                         | cleaved L-D@N-term         | -0.0242 | 1486.7264 | 496.5828 | 1486.7507 | 496.5909 | 3    | 26.15 |
|          | 4     | 13.6 | LDIGHSDEVEAK    | ITRAQ4plex@N-term;<br>ITRAQ4plex(K)@12                                         |                            | -0.0100 | 1599.8248 | 534.2822 | 1599.8348 | 534.2855 | 3    | 29.03 |
|          | 4     | 13.6 | DIGHSDEVEAK     | ITRAQ4plex@N-term;<br>ITRAQ4plex(K)@11                                         | cleaved L-D@N-term         | -0.0227 | 1486.7280 | 496.5833 | 1486.7507 | 496.5909 | 3    | 26.05 |
|          | 4     | 13.6 | DIGHSDEVEAK     | ITRAQ4plex@N-term;<br>ITRAQ4plex(K)@11                                         | cleaved L-D@N-term         | -0.0086 | 1486.7421 | 496.5880 | 1486.7507 | 496.5909 | 3    | 25.98 |
|          | 4     | 13.6 | DIGHSDEVEAK     | ITRAQ4plex@N-term;<br>ITRAQ4plex(K)@11                                         | cleaved L-D@N-term         | -0.0092 | 1486.7416 | 496.5878 | 1486.7507 | 496.5909 | 3    | 26.09 |
|          | 4     | 13.6 | LDIGHSDEVEAK    | ITRAQ4plex@N-term;<br>ITRAQ4plex(K)@12                                         |                            | 0.0006  | 1599.8354 | 534.2858 | 1599.8348 | 534.2855 | 3    | 29.13 |
|          | 4     | 13.6 | LDIGHSDEVEAK    | ITRAQ4plex@N-term;<br>ITRAQ4plex(K)@12                                         |                            | 0.0645  | 1599.8994 | 534.3071 | 1599.8348 | 534.2855 | 3    | 37.96 |
|          | 4     | 13.6 | LDIGHSDEVEAK    | ITRAQ4plex@N-term;<br>ITRAQ4plex(K)@12                                         |                            | -0.0321 | 1599.8027 | 534.2748 | 1599.8348 | 534.2855 | 3    | 28.86 |
|          | 4     | 13.6 | LDIGHSDEVEAK    | ITRAQ4plex@N-term;<br>ITRAQ4plex(K)@12                                         |                            | 0.0695  | 1599.9043 | 534.3087 | 1599.8348 | 534.2855 | 3    | 40.10 |
| LIC10219 |       |      |                 |                                                                                |                            |         |           |          |           |          |      |       |
|          | 4     | 11.0 | EVENGGPYQENPKE  | ITRAQ4plex@N-term;<br>Deamidated(N)@4;<br>ITRAQ4plex(K)@13                     |                            | -0.0021 | 1877.8866 | 626.9695 | 1877.8887 | 626.9702 | 3.00 | 26.15 |
|          | 4     | 11.0 | MRPQYEEISILK    | ITRAQ4plex@N-term;<br>ITRAQ4plex(K)@12                                         |                            | 0.0025  | 1793.9978 | 599.0065 | 1793.9953 | 599.0057 | 3.00 | 32.68 |
|          | 4     | 11.0 | EVENGGPYQENPKE  | ITRAQ4plex@N-term;<br>Deamidated(N)@4;<br>ITRAQ4plex(K)@13                     |                            | -0.0021 | 1877.8866 | 626.9695 | 1877.8887 | 626.9702 | 3.00 | 26.09 |
|          | 4     | 11.0 | EVENGGPYQENPKE  | ITRAQ4plex@N-term;<br>Deamidated(N)@4;<br>ITRAQ4plex(K)@13                     |                            | -0.0237 | 1877.8650 | 626.9623 | 1877.8887 | 626.9702 | 3.00 | 26.37 |
|          | 4     | 11.0 | EVENGGPYQENPKE  | ITRAQ4plex@N-term;<br>Deamidated(N)@4;<br>ITRAQ4plex(K)@13                     |                            | -0.0294 | 1877.8594 | 626.9604 | 1877.8887 | 626.9702 | 3.00 | 26.48 |
| LIC10901 |       |      |                 |                                                                                |                            |         |           |          |           |          |      |       |
|          | 11.48 | 17.4 | GRDAISGLPR      | Carbamyl@N-term                                                                | missed R-D@2               | -0.0056 | 1083.5730 | 542.7938 | 1083.5785 | 542.7965 | 2    | 38.38 |
|          | 11.48 | 17.4 | IVIGVPSGITEVER  | No ITRAQ4plex@N-term                                                           |                            | -0.0115 | 1467.8182 | 734.9164 | 1467.8297 | 734.9221 | 2    | 43.73 |
|          | 11.48 | 17.4 | AENPLTCVVLGTGK  | ITRAQ4plex@N-term;<br>Methylthio(C)@7;<br>ITRAQ4plex(K)@14                     |                            | -0.0014 | 1734.9238 | 868.4692 | 1734.9252 | 868.4699 | 2    | 47.72 |
|          | 11.48 | 17.4 | IVIGVPSGITEVER  | ITRAQ4plex@N-term                                                              |                            | -0.0094 | 1611.9224 | 806.9684 | 1611.9318 | 806.9732 | 2    | 44.56 |

|          |      |                        |                                                             |                                                             |         |           |          |           |          |   |       |  |
|----------|------|------------------------|-------------------------------------------------------------|-------------------------------------------------------------|---------|-----------|----------|-----------|----------|---|-------|--|
| 11.48    | 17.4 | TPGEIVAIRPMK           | ITRAQ4plex@N-term;<br>ITRAQ4plex(K)@12                      |                                                             | -0.0031 | 1598.9392 | 533.9870 | 1598.9422 | 533.9880 | 3 | 43.54 |  |
| 11.48    | 17.4 | VLAVGQEAQ              | ITRAQ4plex@N-term;<br>ITRAQ4plex(K)@9                       |                                                             | 0.0118  | 1201.7393 | 601.8769 | 1201.7274 | 601.8710 | 2 | 37.79 |  |
| 11.48    | 17.4 | IVIGVPSGITEVER         | ITRAQ4plex@N-term                                           |                                                             | -0.0042 | 1611.9276 | 806.9711 | 1611.9318 | 806.9732 | 2 | 44.66 |  |
| 11.48    | 17.4 | TPGEIVAIRPMK           | ITRAQ4plex@N-term;<br>ITRAQ4plex(K)@12                      |                                                             | -0.0120 | 1598.9302 | 533.9840 | 1598.9422 | 533.9880 | 3 | 43.60 |  |
| 11.48    | 17.4 | VLAVGQEAQ              | ITRAQ4plex@N-term;<br>ITRAQ4plex(K)@9                       |                                                             | 0.0049  | 1201.7323 | 601.8734 | 1201.7274 | 601.8710 | 2 | 37.68 |  |
|          |      |                        |                                                             |                                                             |         |           |          |           |          |   |       |  |
| 14.01    | 24.4 | LTIGNAFPEKK            | ITRAQ4plex@N-term;<br>ITRAQ4plex(K)@10;<br>ITRAQ4plex(K)@11 | missed K-K@10                                               | -0.0048 | 1648.9830 | 550.6683 | 1648.9878 | 550.6699 | 3 | 32.51 |  |
| 14.01    | 24.4 | TPGEIVAIRPMK           | ITRAQ4plex@N-term;<br>ITRAQ4plex(K)@12                      |                                                             | -0.0049 | 1598.9374 | 533.9864 | 1598.9422 | 533.9880 | 3 | 40.47 |  |
| 14.01    | 24.4 | ALKEPTDEILDGIK         | ITRAQ4plex@N-term;<br>ITRAQ4plex(K)@3;<br>ITRAQ4plex(K)@14  |                                                             | -0.0117 | 1973.1293 | 658.7170 | 1973.1410 | 658.7210 | 3 | 33.23 |  |
| 14.01    | 24.4 | GQIVLSEPSVAVHA<br>ATGK | ITRAQ4plex@N-term;<br>ITRAQ4plex(K)@20                      |                                                             | -0.0061 | 2207.2458 | 736.7559 | 2207.2518 | 736.7579 | 3 | 32.30 |  |
| 14.01    | 24.4 | IVIGVPSGITEVER         | ITRAQ4plex@N-term                                           |                                                             | -0.0182 | 1611.9136 | 806.9641 | 1611.9318 | 806.9732 | 2 | 33.18 |  |
| 14.01    | 24.4 | TPGEIVAIRPMK           | ITRAQ4plex@N-term;<br>ITRAQ4plex(K)@12                      |                                                             | -0.0100 | 1598.9323 | 533.9847 | 1598.9422 | 533.9880 | 3 | 50.35 |  |
| 14.01    | 24.4 | TPPELASDIVER           | ITRAQ4plex@N-term                                           |                                                             | 0.0038  | 1469.7886 | 735.9016 | 1469.7848 | 735.8997 | 2 | 31.13 |  |
| 14.01    | 24.4 | ALKEPTDEILDGIK         | ITRAQ4plex@N-term;<br>ITRAQ4plex(K)@3;<br>ITRAQ4plex(K)@14  |                                                             | -0.0113 | 1973.1296 | 658.7172 | 1973.1410 | 658.7210 | 3 | 33.38 |  |
| 14.01    | 24.4 | ALKEPTDEILDGIK         | ITRAQ4plex@N-term;<br>ITRAQ4plex(K)@3;<br>ITRAQ4plex(K)@14  |                                                             | -0.0109 | 1973.1302 | 658.7173 | 1973.1410 | 658.7210 | 3 | 33.67 |  |
| 14.01    | 24.4 | GQIVLSEPSVAVHA<br>ATGK | ITRAQ4plex@N-term;<br>ITRAQ4plex(K)@20                      |                                                             | -0.0281 | 2207.2236 | 736.7485 | 2207.2518 | 736.7579 | 3 | 59.28 |  |
| 14.01    | 24.4 | GQIVLSEPSVAVHA<br>ATGK | ITRAQ4plex@N-term;<br>ITRAQ4plex(K)@20                      |                                                             | -1.9538 | 2205.2979 | 736.1066 | 2207.2518 | 736.7579 | 3 | 59.52 |  |
| 14.01    | 24.4 | IVIGVPSGITEVER         | ITRAQ4plex@N-term                                           |                                                             | -0.0075 | 1611.9243 | 806.9694 | 1611.9318 | 806.9732 | 2 | 33.07 |  |
| 14.01    | 24.4 | TPGEIVAIRPMK           | ITRAQ4plex@N-term;<br>ITRAQ4plex(K)@12                      |                                                             | -0.0100 | 1598.9323 | 533.9847 | 1598.9422 | 533.9880 | 3 | 40.30 |  |
| 14.01    | 24.4 | TPGEIVAIRPMK           | ITRAQ4plex@N-term;<br>ITRAQ4plex(K)@12                      |                                                             | 0.0022  | 1598.9445 | 533.9888 | 1598.9422 | 533.9880 | 3 | 43.77 |  |
| 14.01    | 24.4 | TPGEIVAIRPMK           | ITRAQ4plex@N-term;<br>ITRAQ4plex(K)@12                      |                                                             | 0.0032  | 1598.9454 | 533.9891 | 1598.9422 | 533.9880 | 3 | 46.92 |  |
| 14.01    | 24.4 | TPPELASDIVER           | ITRAQ4plex@N-term                                           |                                                             | -0.0173 | 1469.7675 | 735.8910 | 1469.7848 | 735.8997 | 2 | 30.61 |  |
| 14.01    | 24.4 | TPPELASDIVER           | ITRAQ4plex@N-term                                           |                                                             | -0.0157 | 1469.7690 | 735.8918 | 1469.7848 | 735.8997 | 2 | 30.72 |  |
| LIC11243 |      |                        |                                                             |                                                             |         |           |          |           |          |   |       |  |
|          | 4    | 14.0                   | LDHYEFDVER                                                  | Carbamyl@N-term                                             | -0.0097 | 1364.5901 | 683.3023 | 1364.5997 | 683.3071 | 2 | 43.38 |  |
|          | 4    | 14.0                   | LDHYEFDVER                                                  | Carbamyl@N-term                                             | -0.0028 | 1364.5969 | 683.3057 | 1364.5997 | 683.3071 | 2 | 43.28 |  |
|          | 4    | 14.0                   | LDHYEFDVER                                                  | Carbamyl@N-term                                             | -0.0084 | 1364.5913 | 683.3029 | 1364.5997 | 683.3071 | 2 | 43.49 |  |
|          | 4    | 14.0                   | YTYLKPIYPGR                                                 | ITRAQ4plex@N-term;<br>ITRAQ4plex(K)@5                       | 0.0073  | 1657.9509 | 553.6576 | 1657.9435 | 553.6551 | 3 | 44.96 |  |
|          | 4    | 14.0                   | YTYLKPIYPGR                                                 | ITRAQ4plex@N-term;<br>ITRAQ4plex(K)@5                       | 0.0136  | 1657.9572 | 553.6597 | 1657.9435 | 553.6551 | 3 | 45.16 |  |
| LIC11635 |      |                        |                                                             |                                                             |         |           |          |           |          |   |       |  |
|          | 10   | 10.3                   | TLEWTISSPPTHE<br>NK                                         | ITRAQ4plex@N-term;<br>Deamidated(N)@14;<br>ITRAQ4plex(K)@17 | -0.0542 | 2304.0977 | 769.0398 | 2304.1518 | 769.0579 | 3 | 48.78 |  |
|          | 10   | 10.3                   | PVITGGPYEYR                                                 | ITRAQ4plex@N-term;<br>ITRAQ4plex(Y)@10                      | -0.0630 | 1538.7708 | 770.3926 | 1538.8337 | 770.4241 | 2 | 39.91 |  |
|          | 10   | 10.3                   | STATASHTDNYLN<br>HEK                                        | Carbamyl@N-term;<br>ITRAQ4plex(K)@16                        | 0.0070  | 1974.9222 | 659.3147 | 1974.9153 | 659.3124 | 3 | 37.16 |  |
|          | 10   | 10.3                   | TAGDNPWGGK                                                  | ITRAQ4plex@N-term;<br>ITRAQ4plex(K)@10                      | -0.0180 | 1289.6428 | 645.8287 | 1289.6608 | 645.8377 | 2 | 37.64 |  |
|          | 10   | 10.3                   | TLEWTISSPPTHE<br>NK                                         | ITRAQ4plex@N-term;<br>ITRAQ4plex(K)@17                      | -0.0201 | 2303.1477 | 768.7231 | 2303.1677 | 768.7299 | 3 | 46.04 |  |
|          | 10   | 10.3                   | TPVITGGPYEYR                                                | ITRAQ4plex@N-term                                           | -0.0182 | 1495.7611 | 748.8878 | 1495.7793 | 748.8969 | 2 | 40.38 |  |
|          | 10   | 10.3                   | STATASHTDNYLN<br>HEK                                        | Carbamyl@N-term;<br>Deamidated(N)@13;<br>ITRAQ4plex(K)@16   | 0.0066  | 1975.9059 | 659.3147 | 1975.8993 | 659.3124 | 3 | 36.47 |  |
|          | 10   | 10.3                   | STATASHTDNYLN<br>HEK                                        | Carbamyl@N-term;<br>ITRAQ4plex(K)@16                        | 0.0092  | 1974.9244 | 659.3154 | 1974.9153 | 659.3124 | 3 | 37.31 |  |
|          | 10   | 10.3                   | STATASHTDNYLN<br>HEK                                        | Carbamyl@N-term;<br>ITRAQ4plex(K)@16                        | -0.0016 | 1974.9137 | 659.3118 | 1974.9153 | 659.3124 | 3 | 37.41 |  |
|          | 10   | 10.3                   | TAGDNPWGGK                                                  | ITRAQ4plex@N-term;<br>ITRAQ4plex(K)@10                      | -0.0131 | 1289.6477 | 645.8311 | 1289.6608 | 645.8377 | 2 | 37.58 |  |
|          | 10   | 10.3                   | TAGDNPWGGK                                                  | ITRAQ4plex@N-term;<br>ITRAQ4plex(K)@10                      | -0.0134 | 1289.6475 | 645.8310 | 1289.6608 | 645.8377 | 2 | 37.79 |  |
|          | 10   | 10.3                   | TLEWTISSPPTHE<br>NK                                         | ITRAQ4plex@N-term;<br>ITRAQ4plex(K)@17                      | 0.0012  | 2303.1689 | 768.7302 | 2303.1677 | 768.7299 | 3 | 45.97 |  |

|          |    |      |                         |                                                                |  |         |           |          |           |          |   |       |  |
|----------|----|------|-------------------------|----------------------------------------------------------------|--|---------|-----------|----------|-----------|----------|---|-------|--|
|          | 10 | 10.3 | TLEWTISSPPTHENFEK       | ITRAQ4plex@N-term; ITRAQ4plex(K)@17                            |  | -0.0096 | 2303.1580 | 768.7266 | 2303.1677 | 768.7299 | 3 | 46.14 |  |
|          | 10 | 10.3 | TLEWTISSPPTHENFEK       | ITRAQ4plex@N-term; ITRAQ4plex(K)@17                            |  | -0.0129 | 2303.1548 | 768.7255 | 2303.1677 | 768.7299 | 3 | 49.19 |  |
|          | 10 | 10.3 | TLEWTISSPPTHENFEK       | ITRAQ4plex@N-term; ITRAQ4plex(K)@17                            |  | -0.0087 | 2303.1589 | 768.7269 | 2303.1677 | 768.7299 | 3 | 49.30 |  |
|          | 10 | 10.3 | TLEWTISSPPTHENFEK       | ITRAQ4plex@N-term; ITRAQ4plex(K)@17                            |  | -0.0071 | 2303.1606 | 768.7275 | 2303.1677 | 768.7299 | 3 | 49.40 |  |
|          | 10 | 10.3 | TPVITGGPYEYR            | ITRAQ4plex@N-term                                              |  | -0.0067 | 1495.7726 | 748.8936 | 1495.7793 | 748.8969 | 2 | 40.32 |  |
|          | 10 | 10.3 | TPVITGGPYEYR            | ITRAQ4plex@N-term                                              |  | -0.0154 | 1495.7639 | 748.8892 | 1495.7793 | 748.8969 | 2 | 40.49 |  |
|          | 10 | 10.3 | TPVITGGPYEYR            | ITRAQ4plex@N-term; ITRAQ4plex(Y)@9                             |  | 0.0001  | 1639.8816 | 547.6345 | 1639.8813 | 547.6344 | 3 | 40.43 |  |
|          |    |      |                         |                                                                |  |         |           |          |           |          |   |       |  |
|          | 2  | 9.6  | TLEWTISSPPTHENFEK       | ITRAQ4plex@N-term; ITRAQ4plex(K)@17                            |  | -0.9822 | 2302.1855 | 768.4025 | 2303.1677 | 768.7299 | 3 | 51.19 |  |
|          | 2  | 9.6  | GIWSWLTIDHK             | ITRAQ4plex@N-term; ITRAQ4plex(K)@12                            |  | -0.0150 | 1743.9402 | 582.3207 | 1743.9552 | 582.3257 | 3 | 39.11 |  |
|          | 2  | 9.6  | TLEWTISSPPTHENFEK       | ITRAQ4plex@N-term; ITRAQ4plex(K)@17                            |  | -1.9281 | 2301.2397 | 768.0872 | 2303.1677 | 768.7299 | 3 | 55.05 |  |
|          | 2  | 9.6  | GIWSWLTIDHK             | ITRAQ4plex@N-term; ITRAQ4plex(K)@12                            |  | -0.0003 | 1743.9548 | 582.3256 | 1743.9552 | 582.3257 | 3 | 39.22 |  |
|          | 2  | 9.6  | GIWSWLTIDHK             | ITRAQ4plex@N-term; ITRAQ4plex(K)@12                            |  | -0.0041 | 1743.9510 | 582.3243 | 1743.9552 | 582.3257 | 3 | 39.28 |  |
|          | 2  | 9.6  | GIWSWLTIDHK             | ITRAQ4plex@N-term; ITRAQ4plex(K)@12                            |  | -0.0065 | 1743.9486 | 582.3235 | 1743.9552 | 582.3257 | 3 | 39.38 |  |
|          | 2  | 9.6  | GIWSWLTIDHK             | ITRAQ4plex@N-term; ITRAQ4plex(K)@12                            |  | -0.0102 | 1743.9449 | 582.3223 | 1743.9552 | 582.3257 | 3 | 39.21 |  |
|          | 2  | 9.6  | TAGDNPWGGK              | ITRAQ4plex@N-term; ITRAQ4plex(K)@10                            |  | -0.0013 | 1289.6595 | 645.8370 | 1289.6608 | 645.8377 | 2 | 27.89 |  |
|          | 2  | 9.6  | TAGDNPWGGK              | Carbamyl@N-term; ITRAQ4plex(K)@10                              |  | 0.0557  | 1188.6202 | 595.3174 | 1188.5645 | 595.2895 | 2 | 28.01 |  |
|          | 2  | 9.6  | TAGDNPWGGK              | Carbamyl@N-term; ITRAQ4plex(K)@10                              |  | 0.0451  | 1188.6096 | 595.3121 | 1188.5645 | 595.2895 | 2 | 28.11 |  |
|          | 2  | 9.6  | TAGDNPWGGK              | Carbamyl@N-term; ITRAQ4plex(K)@10                              |  | 0.0382  | 1188.6028 | 595.3087 | 1188.5645 | 595.2895 | 2 | 28.21 |  |
|          | 2  | 9.6  | TLEWTISSPPTHENFEK       | ITRAQ4plex@N-term; ITRAQ4plex(K)@17                            |  | -0.9811 | 2302.1868 | 768.4028 | 2303.1677 | 768.7299 | 3 | 46.09 |  |
|          | 2  | 9.6  | TLEWTISSPPTHENFEK       | ITRAQ4plex@N-term; ITRAQ4plex(K)@17                            |  | -0.9859 | 2302.1819 | 768.4012 | 2303.1677 | 768.7299 | 3 | 49.83 |  |
|          | 2  | 9.6  | TLEWTISSPPTHENFEK       | ITRAQ4plex@N-term; ITRAQ4plex(K)@17                            |  | 0.0146  | 2303.1824 | 768.7347 | 2303.1677 | 768.7299 | 3 | 58.86 |  |
|          | 2  | 9.6  | TPVITGGPYEYR            | ITRAQ4plex@N-term                                              |  | -0.0654 | 1495.7139 | 748.8642 | 1495.7793 | 748.8969 | 2 | 29.78 |  |
|          | 2  | 9.6  | TPVITGGPYEYR            | ITRAQ4plex@N-term                                              |  | -0.0578 | 1495.7214 | 748.8680 | 1495.7793 | 748.8969 | 2 | 29.67 |  |
|          | 2  | 9.6  | TPVITGGPYEYR            | ITRAQ4plex@N-term; ITRAQ4plex(Y)@11                            |  | -0.0035 | 1639.8779 | 547.6332 | 1639.8813 | 547.6344 | 3 | 30.11 |  |
|          | 2  | 9.6  | TPVITGGPYEYR            | ITRAQ4plex@N-term; ITRAQ4plex(Y)@9                             |  | -0.0040 | 1639.8773 | 547.6331 | 1639.8813 | 547.6344 | 3 | 30.22 |  |
|          | 2  | 9.6  | TPVITGGPYEYR            | ITRAQ4plex@N-term                                              |  | 0.0014  | 1495.7808 | 748.8976 | 1495.7793 | 748.8969 | 2 | 31.15 |  |
|          | 2  | 9.6  | TPVITGGPYEYR            | ITRAQ4plex@N-term                                              |  | 0.0008  | 1495.7802 | 748.8973 | 1495.7793 | 748.8969 | 2 | 31.26 |  |
|          | 2  | 9.6  | TPVITGGPYEYR            | ITRAQ4plex@N-term                                              |  | 0.0036  | 1495.7830 | 748.8987 | 1495.7793 | 748.8969 | 2 | 31.36 |  |
|          | 2  | 9.6  | TLEWTISSPPTHENFEK       | ITRAQ4plex@N-term; ITRAQ4plex(K)@17                            |  | -0.0185 | 2303.1492 | 768.7237 | 2303.1677 | 768.7299 | 3 | 32.59 |  |
|          | 2  | 9.6  | TLEWTISSPPTHENFEK       | ITRAQ4plex@N-term; ITRAQ4plex(K)@17                            |  | -0.0207 | 2303.1470 | 768.7230 | 2303.1677 | 768.7299 | 3 | 33.03 |  |
|          | 2  | 9.6  | TLEWTISSPPTHENFEK       | ITRAQ4plex@N-term; ITRAQ4plex(K)@17                            |  | -0.0220 | 2303.1458 | 768.7225 | 2303.1677 | 768.7299 | 3 | 33.14 |  |
|          | 2  | 9.6  | TLEWTISSPPTHENFEK       | ITRAQ4plex@N-term; ITRAQ4plex(K)@17                            |  | -0.0236 | 2303.1440 | 768.7220 | 2303.1677 | 768.7299 | 3 | 32.49 |  |
|          | 2  | 9.6  | TLEWTISSPPTHENFEK       | ITRAQ4plex@N-term; ITRAQ4plex(K)@17                            |  | -0.0229 | 2303.1448 | 768.7222 | 2303.1677 | 768.7299 | 3 | 32.82 |  |
|          | 2  | 9.6  | TLEWTISSPPTHENFEK       | ITRAQ4plex@N-term; Dehydrated(T)@5; Hex(S)@7; ITRAQ4plex(K)@17 |  | 0.0173  | 2447.2273 | 612.8141 | 2447.2100 | 612.8098 | 4 | 35.80 |  |
|          | 2  | 9.6  | TLEWTISSPPTHENFEK       | ITRAQ4plex@N-term; ITRAQ4plex(K)@17                            |  | -0.9775 | 2302.1904 | 768.4041 | 2303.1677 | 768.7299 | 3 | 44.26 |  |
|          | 2  | 9.6  | TLEWTISSPPTHENFEK       | ITRAQ4plex@N-term; ITRAQ4plex(K)@17                            |  | -0.9755 | 2302.1924 | 768.4047 | 2303.1677 | 768.7299 | 3 | 46.72 |  |
|          | 2  | 9.6  | TLEWTISSPPTHENFEK       | ITRAQ4plex@N-term; ITRAQ4plex(K)@17                            |  | -0.9432 | 2302.2246 | 768.4155 | 2303.1677 | 768.7299 | 3 | 49.93 |  |
|          | 2  | 9.6  | TLEWTISSPPTHENFEK       | ITRAQ4plex@N-term; ITRAQ4plex(K)@17                            |  | 0.0000  | 2303.1677 | 768.7299 | 2303.1677 | 768.7299 | 3 | 50.61 |  |
|          | 2  | 9.6  | TLEWTISSPPTHENFEK       | ITRAQ4plex@N-term; ITRAQ4plex(K)@17                            |  | -0.0052 | 2303.1626 | 768.7281 | 2303.1677 | 768.7299 | 3 | 58.40 |  |
| LIC12141 |    |      |                         |                                                                |  |         |           |          |           |          |   |       |  |
|          | 4  | 9.3  | EISPILNLETDELSSLI SEFPK | ITRAQ4plex@N-term; ITRAQ4plex(K)@23                            |  | 0.0062  | 2890.5369 | 964.5196 | 2890.5307 | 964.5175 | 3 | 40.55 |  |



|          |      |     |                          |                                        |  |         |           |          |           |          |   |       |  |
|----------|------|-----|--------------------------|----------------------------------------|--|---------|-----------|----------|-----------|----------|---|-------|--|
|          | 4    | 9.3 | ITVDDILDIVHEEASEDI<br>LR | ITRAQ4plex@N-term                      |  | 0.0022  | 2438.2686 | 813.7634 | 2438.2662 | 813.7627 | 3 | 1.68  |  |
|          | 4    | 9.3 | ITVDDILDIVHEEASEDI<br>LR | ITRAQ4plex@N-term                      |  | 0.0254  | 2438.2917 | 813.7712 | 2438.2662 | 813.7627 | 3 | 1.43  |  |
|          | 4    | 9.3 | ITVDDILDIVHEEASEDI<br>LR | ITRAQ4plex@N-term                      |  | 0.0201  | 2438.2864 | 813.7694 | 2438.2662 | 813.7627 | 3 | 1.53  |  |
|          | 4    | 9.3 | ITVDDILDIVHEEASEDI<br>LR | ITRAQ4plex@N-term                      |  | -0.9530 | 2437.3132 | 813.4450 | 2438.2662 | 813.7627 | 3 | 39.83 |  |
|          | 4    | 9.3 | ITVDDILDIVHEEASEDI<br>LR | ITRAQ4plex@N-term                      |  | -0.0127 | 2438.2534 | 813.7584 | 2438.2662 | 813.7627 | 3 | 39.94 |  |
|          | 4    | 9.3 | ITVDDILDIVHEEASEDI<br>LR | ITRAQ4plex@N-term                      |  | -0.9658 | 2437.3003 | 813.4407 | 2438.2662 | 813.7627 | 3 | 40.04 |  |
| LIC13076 |      |     |                          |                                        |  |         |           |          |           |          |   |       |  |
|          | 4.82 | 7.7 | TVIGDHNIFR               | Carbamyl@N-term                        |  | -0.0097 | 1213.6107 | 607.8126 | 1213.6204 | 607.8175 | 2 | 42.59 |  |
|          | 4.82 | 7.7 | TVIGDHNIFR               | Carbamyl@N-term                        |  | -0.0054 | 1213.6150 | 607.8148 | 1213.6204 | 607.8175 | 2 | 42.65 |  |
|          | 4.82 | 7.7 | TVIGDHNIFR               | Carbamyl@N-term                        |  | -0.0047 | 1213.6157 | 607.8151 | 1213.6204 | 607.8175 | 2 | 42.75 |  |
|          | 4.82 | 7.7 | VIVHSGISTR               | ITRAQ4plex@N-term                      |  | -0.0025 | 1275.7031 | 426.2417 | 1275.7057 | 426.2425 | 3 | 38.06 |  |
|          | 4.82 | 7.7 | TVIGDHNIFR               | ITRAQ4plex@N-term                      |  | 0.0112  | 1314.7278 | 439.2499 | 1314.7166 | 439.2461 | 3 | 43.45 |  |
|          | 4.82 | 7.7 | VIVHSGISTR               | ITRAQ4plex@N-term                      |  | 0.0149  | 1275.7206 | 426.2475 | 1275.7057 | 426.2425 | 3 | 37.96 |  |
| LIC13491 |      |     |                          |                                        |  |         |           |          |           |          |   |       |  |
|          | 3.22 | 1.9 | IFNIQAEK                 | ITRAQ4plex@N-term;<br>ITRAQ4plex(K)@9  |  | 0.0182  | 1386.8046 | 463.2755 | 1386.7863 | 463.2694 | 3 | 43.54 |  |
|          | 3.5  | 2.1 | NESTTIEHLK               | ITRAQ4plex@N-term;<br>ITRAQ4plex(K)@10 |  | -0.0054 | 1458.7867 | 487.2695 | 1458.7922 | 487.2713 | 3 | 29.00 |  |
