# Supplementary material
Source: PubMed Central journal article supplement (PMC2757032)
Supplement: pr9004597_si_006.pdf [file pr9004597_si_006.pdf]

|            |                                                  |          |           |                       |   |                                       |    |      |     |    |    |    |         |     |
|------------|--------------------------------------------------|----------|-----------|-----------------------|---|---------------------------------------|----|------|-----|----|----|----|---------|-----|
|            |                                                  |          | 1683.8210 |                       |   |                                       |    |      |     |    |    |    |         |     |
|            |                                                  |          | 1716.8656 |                       |   |                                       |    |      |     |    |    |    |         |     |
|            |                                                  |          | 1722.8843 |                       |   |                                       |    |      |     |    |    |    |         |     |
|            |                                                  |          | 1723.8721 |                       |   |                                       |    |      |     |    |    |    |         |     |
|            |                                                  |          | 1771.9745 |                       |   |                                       |    |      |     |    |    |    |         |     |
|            |                                                  |          | 1870.9263 |                       |   |                                       |    |      |     |    |    |    |         |     |
|            |                                                  |          | 2029.0257 |                       |   |                                       |    |      |     |    |    |    |         |     |
|            |                                                  |          | 2211.1040 |                       |   |                                       |    |      |     |    |    |    |         |     |
|            |                                                  |          | 2225.1204 |                       |   |                                       |    |      |     |    |    |    |         |     |
|            |                                                  |          | 2284.0171 |                       |   |                                       |    |      |     |    |    |    |         |     |
|            |                                                  |          | 2383.9614 |                       |   |                                       |    |      |     |    |    |    |         |     |
|            |                                                  |          | 2546.1104 |                       |   |                                       |    |      |     |    |    |    |         |     |
|            |                                                  |          | 2645.2730 |                       |   |                                       |    |      |     |    |    |    |         |     |
|            |                                                  |          | 2659.2826 |                       |   |                                       |    |      |     |    |    |    |         |     |
|            |                                                  |          | 2705.1729 |                       |   |                                       |    |      |     |    |    |    |         |     |
|            |                                                  |          | 3677.9168 |                       |   |                                       |    |      |     |    |    |    |         |     |
| Q72MM7     | Protein of unknown function                      | LIC13166 | 515.3240  | MSDB - All entries    | 1 | Carbamidomethyl (C) and Oxidation (M) | 10 | Mono | MH+ | 13 | 10 | 35 | Trypsin | 147 |
|            |                                                  |          | 542.2433  |                       |   |                                       |    |      |     |    |    |    |         |     |
|            |                                                  |          | 568.1255  |                       |   |                                       |    |      |     |    |    |    |         |     |
|            |                                                  |          | 712.2583  |                       |   |                                       |    |      |     |    |    |    |         |     |
|            |                                                  |          | 751.4588  |                       |   |                                       |    |      |     |    |    |    |         |     |
|            |                                                  |          | 787.4142  |                       |   |                                       |    |      |     |    |    |    |         |     |
|            |                                                  |          | 805.4199  |                       |   |                                       |    |      |     |    |    |    |         |     |
|            |                                                  |          | 842.5100  |                       |   |                                       |    |      |     |    |    |    |         |     |
|            |                                                  |          | 867.4572  |                       |   |                                       |    |      |     |    |    |    |         |     |
|            |                                                  |          | 908.4482  |                       |   |                                       |    |      |     |    |    |    |         |     |
|            |                                                  |          | 961.5203  |                       |   |                                       |    |      |     |    |    |    |         |     |
|            |                                                  |          | 1023.5545 |                       |   |                                       |    |      |     |    |    |    |         |     |
|            |                                                  |          | 1112.5680 |                       |   |                                       |    |      |     |    |    |    |         |     |
|            |                                                  |          | 1215.6330 |                       |   |                                       |    |      |     |    |    |    |         |     |
|            |                                                  |          | 1620.8879 |                       |   |                                       |    |      |     |    |    |    |         |     |
|            |                                                  |          | 1647.8838 |                       |   |                                       |    |      |     |    |    |    |         |     |
|            |                                                  |          | 1661.8899 |                       |   |                                       |    |      |     |    |    |    |         |     |
|            |                                                  |          | 1706.8445 |                       |   |                                       |    |      |     |    |    |    |         |     |
|            |                                                  |          | 1816.9220 |                       |   |                                       |    |      |     |    |    |    |         |     |
|            |                                                  |          | 1832.0406 |                       |   |                                       |    |      |     |    |    |    |         |     |
|            |                                                  |          | 1869.8318 |                       |   |                                       |    |      |     |    |    |    |         |     |
|            |                                                  |          | 2211.1040 |                       |   |                                       |    |      |     |    |    |    |         |     |
|            |                                                  |          | 2826.4335 |                       |   |                                       |    |      |     |    |    |    |         |     |
| Q72VD7     | Electron transfer flavoprotein beta-subunit EtFB | LIC10361 | 832.3351  | MSDB - Other bacteria | 1 | Carbamidomethyl (C) and Oxidation (M) | 10 | Mono | MH+ | 6  | 15 | 33 | Trypsin | 70  |
|            |                                                  |          | 842.5100  |                       |   |                                       |    |      |     |    |    |    |         |     |
|            |                                                  |          | 1114.5891 |                       |   |                                       |    |      |     |    |    |    |         |     |
|            |                                                  |          | 1205.7860 |                       |   |                                       |    |      |     |    |    |    |         |     |
|            |                                                  |          | 1250.7256 |                       |   |                                       |    |      |     |    |    |    |         |     |
|            |                                                  |          | 1266.7112 |                       |   |                                       |    |      |     |    |    |    |         |     |
|            |                                                  |          | 1316.7707 |                       |   |                                       |    |      |     |    |    |    |         |     |
|            |                                                  |          | 1330.7755 |                       |   |                                       |    |      |     |    |    |    |         |     |
|            |                                                  |          | 1406.7475 |                       |   |                                       |    |      |     |    |    |    |         |     |
|            |                                                  |          | 1475.7624 |                       |   |                                       |    |      |     |    |    |    |         |     |
|            |                                                  |          | 1659.9022 |                       |   |                                       |    |      |     |    |    |    |         |     |
|            |                                                  |          | 1663.8831 |                       |   |                                       |    |      |     |    |    |    |         |     |
|            |                                                  |          | 1920.9607 |                       |   |                                       |    |      |     |    |    |    |         |     |
|            |                                                  |          | 1937.9858 |                       |   |                                       |    |      |     |    |    |    |         |     |
|            |                                                  |          | 1951.9799 |                       |   |                                       |    |      |     |    |    |    |         |     |
|            |                                                  |          | 1969.9597 |                       |   |                                       |    |      |     |    |    |    |         |     |
|            |                                                  |          | 1993.9779 |                       |   |                                       |    |      |     |    |    |    |         |     |
|            |                                                  |          | 2146.0811 |                       |   |                                       |    |      |     |    |    |    |         |     |
|            |                                                  |          | 2211.1040 |                       |   |                                       |    |      |     |    |    |    |         |     |
|            |                                                  |          | 2372.1447 |                       |   |                                       |    |      |     |    |    |    |         |     |
|            |                                                  |          | 2807.3291 |                       |   |                                       |    |      |     |    |    |    |         |     |
| CH10_LEPIC | GroES                                            | LIC11336 | 524.1285  | MSDB - All entries    | 1 | Carbamidomethyl (C) and Oxidation (M) | 10 | Mono | MH+ | 6  | 13 | 56 | Trypsin | 88  |
